# Supplementary material for: Parent-of-origin effects propagate through networks to shape metabolic traits
Source: bioRxiv preprint, doi:10.1101/2021.08.10.455860, version 1 (2021-08-11)
Supplement: Supplemental Table 1 [file 455860_file03.xlsx]

## Sheet: SummaryStatistics
	Model:	Cross				Cross:Sex				Cross:Diet				Cross:Sex:Diet				Group POE Scores
	Gene	F-statistic	Effect Size	P-value	Adjusted P-value	F-statistic	Effect Size	P-value	Adjusted P-value	F-statistic	Effect Size	P-value	Adjusted P-value	F-statistic	Effect Size	P-value	Adjusted P-value	Cross	High Fat Males	Low Fat Males	High Fat Females	Low Fat Females	Males	Females	High Fat	Low Fat
	Peg3	411110	0.999933	2.06746e-50	0.0111111	1.3668	6.49184e-06	0.274862	0.827644	0.48703	2.36918e-06	0.620643	0.955843	0.481133	2.34049e-06	0.624165	0.974875	0.997357	1	1	0.992274	0.997559	1	0.994917	0.995877	0.998779
	Mir770	6.26149e+31	1	3.56972e-246	0.0125	1.07488	3.4333e-32	0.364748	0.872871	NA	NA	NA	NA	NA	NA	NA	NA	-1	NA	-1	NA	-1	-1	-1	NA	-1
	Gm7162	1.42052e+32	1	1.56205e-279	0.0142857	1.59312	2.24301e-32	0.230658	0.811391	NA	NA	NA	NA	NA	NA	NA	NA	1	1	1	NA	1	1	1	1	1
	Gm16574	5.79828e+31	1	4.5047e-291	0.0166667	0.555794	1.9171e-32	0.582665	0.94787	NA	NA	NA	NA	NA	NA	NA	NA	1	NA	1	1	1	1	1	1	1
	Rian	4.61139e+31	1	0	0.02	1.68745	7.31861e-32	0.208067	0.792376	0.145885	6.32717e-33	0.865086	0.984427	1.68745	7.31861e-32	0.208067	0.92646	-1	-1	-1	-1	-1	-1	-1	-1	-1
	Snrpn	6.20423e+32	1	0	0.02	0.906086	2.92087e-33	0.418047	0.882098	1.01058	3.25772e-33	0.379607	0.920798	0.906086	2.92087e-33	0.418047	0.936005	1	1	1	1	1	1	1	1	1
	Snurf	6.20423e+32	1	0	0.02	0.906086	2.92087e-33	0.418047	0.882098	1.01058	3.25772e-33	0.379607	0.920798	0.906086	2.92087e-33	0.418047	0.936005	1	1	1	1	1	1	1	1	1
	Airn	4.75961e+33	1	0	0.02	0.00873016	0	0.991311	0.99941	1.70238	7.15345e-34	0.205392	0.822383	9.11436e-32	-1.45969e-48	1	1	1	1	1	1	1	1	1	1	1
	Mirg	Inf	1	0	0.02	NA	NA	NA	NA	NA	NA	NA	NA	NA	NA	NA	NA	-1	NA	NA	NA	NA	NA	NA	NA	NA
	Ctsh	102.575	0.777648	6.01112e-10	0.0238095	1.24039	0.021717	0.307909	0.847959	1.64084	0.0248794	0.215704	0.835814	0.283304	0.00429561	0.755881	0.991185	0.125065	0.145131	0.132411	0.132108	0.0990716	0.136354	0.11559	0.136322	0.115741
	Blcap	103.608	0.790244	5.46594e-10	0.025	1.76877	0.0270336	0.192963	0.784327	0.0394347	0.000601555	0.961398	0.996812	0.442261	0.00674645	0.647933	0.974745	-0.222151	-0.170275	-0.207908	-0.271845	-0.227114	-0.190882	-0.24948	-0.226879	-0.217511
	Mcts2	131.112	0.801401	5.60042e-11	0.0263158	2.5315	0.031849	0.101467	0.679014	1.27316	0.015564	0.298948	0.891643	0.940994	0.0115034	0.404755	0.93437	-0.652949	-0.513905	-0.553625	-0.754475	-0.777423	-0.535819	-0.765949	-0.633476	-0.665524
	Sgce	107378	0.999734	1.04635e-43	0.0272727	0.894444	1.41191e-05	0.422585	0.887933	1.03205	1.92177e-05	0.372195	0.914351	0.884615	1.64723e-05	0.426458	0.947417	0.996875	1	1	0.988281	1	1	0.994141	0.993304	1
	Gm10222	586.34	0.896224	7.21132e-18	0.0277778	15.0438	0.04538	6.64416e-05	0.0470588	0.0493402	0.000150834	0.951958	0.996487	7.35384	0.0224808	0.00339568	0.586364	-0.739678	-0.514516	-0.683346	-0.9375	-0.76706	-0.61099	-0.85228	-0.756221	-0.725203
	Gnas	48.717	0.627366	4.09892e-07	0.0291667	0.277677	0.00536487	0.760045	0.975294	1.26485	0.032577	0.301192	0.893677	1.42558	0.0367166	0.260825	0.926308	-0.051965	-0.0629307	-0.0522384	-0.0286241	-0.0651828	-0.057503	-0.0469034	-0.0440664	-0.0587106
	H13	741.948	0.937029	5.25472e-19	0.0294118	5.07557	0.013664	0.0149327	0.341429	4.49618	0.0113567	0.0224821	0.474249	3.85883	0.00974687	0.0358844	0.946857	-0.42887	-0.359784	-0.399195	-0.4148	-0.536958	-0.379477	-0.475879	-0.385544	-0.468077
	Grb10	148416	0.9998	2.53187e-45	0.03	3.1295	4.31564e-05	0.0627892	0.58556	0.124738	1.68058e-06	0.883321	0.986553	0.106918	1.4405e-06	0.899043	0.997667	-0.995037	-1	-1	-0.992424	-0.988965	-1	-0.990695	-0.995671	-0.994483
	Gm20721	68.1531	0.703751	2.49062e-08	0.0304348	0.256324	0.00396345	0.776072	0.975465	1.19061	0.0245886	0.322089	0.902986	1.39784	0.0288683	0.267349	0.92824	-0.0593025	-0.0699474	-0.0591771	-0.0379141	-0.0713288	-0.0644265	-0.0546214	-0.0522805	-0.0652529
	Mir1906-1	1027.91	0.975688	1.35713e-20	0.03125	0.145015	0.000275294	0.865794	0.98718	0.327008	0.000620787	0.724376	0.97092	0.83479	0.00158475	0.446694	0.953831	-0.929036	-0.960526	-0.875835	-0.930147	-0.949635	-0.91818	-0.939891	-0.945337	-0.912735
	Il1rl1	20630.3	0.999806	1.40929e-08	0.0318182	NA	NA	NA	NA	NA	NA	NA	NA	NA	NA	NA	NA	-0.652581	NA	NA	NA	NA	NA	NA	-0.652581	NA
	Adam23	33.7518	0.470623	6.41393e-06	0.032	2.01345	0.0569744	0.156392	0.750744	2.22005	0.061911	0.131352	0.763832	3.2493	0.0906139	0.0571683	0.898311	0.0948878	0.155965	0.076568	0.0324155	0.116484	0.115006	0.0744497	0.0907793	0.0965259
	Peg10	2257.46	0.987383	1.82384e-24	0.0333333	0.395692	0.000446911	0.677709	0.970283	2.21777	0.00194005	0.131602	0.764326	0.309955	0.00027114	0.736496	0.986869	0.861828	0.824836	0.880295	0.852186	0.876762	0.857901	0.864474	0.8417	0.878528
	Nnat	7607.37	0.995649	2.25933e-28	0.0357143	1.45197	0.000500176	0.256668	0.819646	3.20362	0.000838577	0.0610543	0.631185	1.46698	0.000383994	0.253309	0.929632	0.972528	1	0.98873	1	0.91087	0.99356	0.955435	1	0.9498
	Meg3	5918.52	0.995721	3.00039e-29	0.0384615	0.202579	6.8163e-05	0.818063	0.978599	0.200736	6.7543e-05	0.819546	0.978624	0.814471	0.00027405	0.455244	0.955156	-0.969605	-0.980769	-0.947281	-0.969551	-0.98082	-0.964025	-0.975186	-0.97516	-0.96405
	Cdkn1c	6059.07	0.995277	2.29294e-29	0.0416667	0.958333	0.000314836	0.398323	0.886618	0.958333	0.000314836	0.398323	0.92138	0.958333	0.000314836	0.398323	0.932252	-0.987779	-1	-1	-0.951117	-1	-1	-0.975559	-0.975559	-1
	Plcd1	21.744	0.38475	0.000119489	0.0923077	1.09458	0.0579943	0.352226	0.870679	4.7683	0.168746	0.0190409	0.461084	0.522409	0.0184876	0.600265	0.976846	0.250183	0.502474	0.233114	0.272849	0.0813694	0.332666	0.177109	0.375955	0.157242
	Bak1	18.0071	0.41828	0.000362984	0.151852	0.512615	0.0192302	0.606231	0.952573	0.0651396	0.0030262	0.937125	0.995481	1.44389	0.0670791	0.258497	0.925545	0.332524	0.386941	0.152364	0.314836	0.503623	0.264491	0.40923	0.355991	0.304044
	Hebp1	16.4015	0.259068	0.000496974	0.171429	2.3064	0.0798986	0.122208	0.720395	5.19678	0.16417	0.0137325	0.411728	4.45094	0.140608	0.0232264	0.946296	-0.0261863	-0.0186759	-0.0357652	-0.0269218	-0.0242702	-0.0277752	-0.025596	-0.0234719	-0.0300177
	Uqcrb	16.079	0.256813	0.00054893	0.172414	2.69513	0.0858371	0.0888022	0.66761	3.91715	0.125129	0.034354	0.555556	5.15309	0.16461	0.0141526	0.933333	-0.0505956	-0.129309	-0.0136989	-0.0435453	-0.0191103	-0.0697091	-0.0313278	-0.0871748	-0.0164046
	Pde7a	15.3049	0.296223	0.000699526	0.18	1.64259	0.0624605	0.215373	0.797135	0.15495	0.00599805	0.857345	0.981919	4.88342	0.189035	0.0170755	0.906098	0.0499779	0.0571962	0.080205	0.0225099	0.0343249	0.0725929	0.0284174	0.0420632	0.057265
	Ppp2r5a	15.1458	0.239092	0.00073576	0.180645	6.19489	0.174484	0.00704328	0.25969	5.87834	0.185591	0.00866821	0.323846	0.527411	0.0166515	0.597098	0.975314	0.0291271	0.0439672	0.0625703	-0.0098434	0.0182797	0.0561369	0.00421817	0.0153631	0.040425
	Col3a1	15.1375	0.388626	0.000787077	0.18125	0.0964675	0.00585085	0.908421	0.992745	0.520018	0.026701	0.601638	0.951298	0.290379	0.0149099	0.750802	0.989105	-0.0986772	-0.0943241	-0.110548	-0.0723328	-0.116415	-0.103595	-0.0943739	-0.0817576	-0.113482
	Ccnd2	14.4022	0.363301	0.000934617	0.197059	0.0828046	0.00378674	0.920804	0.990684	0.69252	0.0349381	0.510447	0.931718	0.344901	0.0174005	0.711892	0.984217	0.0255741	0.024878	0.030151	0.0108689	0.0354305	0.0280889	0.0231497	0.0176654	0.0327908
	Fsd2	14.6563	0.272376	0.00086073	0.20303	4.24546	0.160844	0.0269612	0.4609	2.51312	0.0934085	0.103009	0.74221	1.31788	0.0489835	0.287169	0.931409	0.0414585	0.0589024	0.0483352	0.00487132	0.0622001	0.0520318	0.0335357	0.0280186	0.0552676
	Procr	14.0868	0.282488	0.00103611	0.205714	2.09715	0.0937143	0.145672	0.745037	3.17864	0.127485	0.060414	0.626096	1.11429	0.0446906	0.345225	0.934974	-0.163389	-0.219104	-0.109573	-0.304829	-0.0385901	-0.160621	-0.171709	-0.262385	-0.0740818
	Agap1	13.7754	0.338383	0.00114825	0.219444	0.71892	0.03552	0.497906	0.921333	0.698797	0.0343308	0.507434	0.932547	0.549382	0.0269902	0.584696	0.973671	0.204084	0.13033	0.310491	0.19815	0.186287	0.221241	0.192218	0.159889	0.248389
	Ogfrl1	125.835	0.976714	0.00151873	0.248718	NA	NA	NA	NA	NA	NA	NA	NA	NA	NA	NA	NA	0.552637	NA	NA	NA	NA	NA	NA	NA	NA
	Ldlrad4	12.8794	0.286104	0.00155211	0.25	0.789521	0.0351666	0.465986	0.913668	3.10192	0.137813	0.0641668	0.642455	0.677058	0.0300805	0.51795	0.96316	-0.237816	-0.121865	-0.464261	-0.037761	-0.320197	-0.296783	-0.178979	-0.0756303	-0.392229
	Lrrcc1	30.3129	0.83477	0.00150682	0.25	NA	NA	NA	NA	NA	NA	NA	NA	NA	NA	NA	NA	0.563085	NA	0.500474	NA	NA	0.500474	NA	NA	0.57396
	Rapgef5	13.1563	0.296591	0.00141278	0.251351	2.62447	0.116672	0.0940473	0.672678	1.12991	0.0509448	0.340346	0.906653	0.346641	0.0156291	0.71069	0.98476	0.0969818	0.156796	0.15874	0.0810459	-0.00547233	0.16008	0.0377868	0.116316	0.0766338
	Gm12002	13.3754	0.400941	0.00167529	0.258537	0.492288	0.0295137	0.61881	0.95414	NA	NA	NA	NA	NA	NA	NA	NA	-0.30856	-0.604809	NA	-0.346735	-0.210937	-0.392354	-0.278836	-0.43276	-0.176254
	Abi3	16.6465	0.415493	0.00221433	0.297826	6.70899	0.334909	0.0141989	0.334804	NA	NA	NA	NA	NA	NA	NA	NA	-0.288469	NA	NA	-0.452038	NA	0.0470225	-0.487842	-0.290324	NA
	Stx16	12.1626	0.229605	0.00198771	0.302381	6.109	0.238431	0.00744864	0.257664	2.01497	0.0760772	0.156189	0.792717	0.780641	0.0294738	0.469876	0.95852	-0.046339	0.0411012	-0.0378467	-0.0822377	-0.0949589	-0.00225268	-0.0885983	-0.0238947	-0.0664028
	Npepl1	11.9536	0.335237	0.0021388	0.304444	0.179171	0.0104056	0.837118	0.983119	0.0840482	0.00471426	0.919668	0.992247	0.0884953	0.0049637	0.915618	0.999791	-0.0600821	-0.0522597	-0.0728817	-0.0554043	-0.0559997	-0.0641177	-0.055702	-0.0550667	-0.0644407
	Ugt1a7c	12.0252	0.160146	0.00208564	0.306977	15.4696	0.430638	5.533e-05	0.04	2.27218	0.0605196	0.125746	0.758304	2.29007	0.0609962	0.123882	0.897126	0.0214809	0.0692469	0.0390293	0.000970484	-0.0158601	0.053583	-0.0074448	0.0323367	0.0115846
	H2-K1	11.6556	0.161461	0.00237634	0.308333	5.16681	0.136093	0.0140192	0.332673	12.0721	0.334462	0.000260281	0.0296296	1.52739	0.0423168	0.238323	0.936427	0.00987639	0.0150366	0.0144974	0.00631439	0.00584278	0.0133541	0.00607858	0.010554	0.0101701
	Fto	11.9624	0.326286	0.00213216	0.311364	0.643212	0.0344067	0.534797	0.931992	0.0675984	0.00368762	0.934821	0.995531	0.139151	0.00759095	0.870824	0.996204	-0.110612	-0.101329	-0.0498466	-0.139736	-0.147221	-0.0746032	-0.143478	-0.12333	-0.0985338
	Mfsd11	11.6715	0.301936	0.00236296	0.312766	1.06921	0.0531116	0.359735	0.872574	0.684869	0.0354346	0.514145	0.934778	0.237881	0.0123078	0.790212	0.992376	0.0553104	0.0336557	0.0606812	0.0380465	0.0872755	0.049001	0.062661	0.0351493	0.0739783
	Rnf19b	11.2934	0.261444	0.00270474	0.32	0.317697	0.0148117	0.730966	0.976629	2.35434	0.109007	0.117432	0.760101	1.77938	0.082386	0.191196	0.924027	0.047262	0.0663908	0.0261282	0.0767399	0.0246597	0.0443212	0.0506998	0.0692244	0.0253939
	Tle1	11.3871	0.250715	0.00261522	0.320408	2.98516	0.131478	0.0703733	0.620875	0.839412	0.0369634	0.444773	0.919403	1.69114	0.0744691	0.206433	0.927982	0.0726472	0.0810893	-0.00508952	0.0942748	0.109275	0.0385327	0.101775	0.0933726	0.0520928
	Mat2b	11.2524	0.235809	0.0027449	0.321569	0.895173	0.0355126	0.422299	0.88214	5.07926	0.212885	0.0148945	0.428655	0.758536	0.0317922	0.479713	0.956475	-0.0651254	-0.118094	-0.0216967	-0.117923	0.000319764	-0.0701496	-0.0588014	-0.121493	-0.0106884
	Akr1e1	11.045	0.261775	0.00295862	0.338462	2.50384	0.110281	0.103796	0.682404	1.31	0.0620958	0.289209	0.883973	0.260032	0.0123259	0.773263	0.994079	-0.0784384	-0.0947093	-0.166093	0.00996757	-0.0685037	-0.131989	-0.0292681	-0.0364469	-0.117298
	Ugt1a9	10.8771	0.156252	0.00314496	0.345283	12.5507	0.378424	0.000206561	0.0607143	2.36934	0.0680722	0.11598	0.759132	2.94762	0.0846866	0.0725048	0.910133	0.0231339	0.0749675	0.0353671	0.00379298	-0.0138123	0.054579	-0.00500965	0.0365479	0.0107774
	Car3	10.168	0.148182	0.00408723	0.369355	3.63636	0.121786	0.0424404	0.533666	12.6561	0.368885	0.000196432	0.0291667	1.43261	0.0417559	0.2592	0.924544	-0.0161867	-0.0259937	-0.00464765	-0.0471943	0.00750936	-0.0131873	-0.0198425	-0.0362002	0.00143086
	Ugt1a10	10.3069	0.150586	0.00388061	0.372881	12.5979	0.385611	0.000201964	0.0592593	2.19721	0.0642034	0.133892	0.765145	2.77417	0.0810624	0.0833084	0.916783	0.0226657	0.0741946	0.0353671	0.00276211	-0.0138123	0.0541925	-0.00552508	0.0355724	0.0107774
	Ugt1a8	10.3069	0.150586	0.00388061	0.372881	12.5979	0.385611	0.000201964	0.0592593	2.19721	0.0642034	0.133892	0.765145	2.77417	0.0810624	0.0833084	0.916783	0.0226657	0.0741946	0.0353671	0.00276211	-0.0138123	0.0541925	-0.00552508	0.0355724	0.0107774
	Ugt1a6b	10.4305	0.149037	0.00370648	0.373684	12.4206	0.370759	0.000219864	0.0586207	2.33483	0.0667227	0.119351	0.759379	3.52239	0.10066	0.0462943	0.911915	0.0207681	0.0699377	0.0319077	0.00167504	-0.0137668	0.0505417	-0.00604585	0.0333433	0.00907046
	Dhcr7	10.664	0.147789	0.00406866	0.37541	2.50568	0.0953862	0.108193	0.696265	17.2141	0.477129	5.42428e-05	0.0125	1.52672	0.0423166	0.242736	0.935178	-0.162114	0.0973823	-0.278251	0.0650925	-0.621914	-0.0825873	-0.229339	0.0758367	-0.450083
	Gm22881	10.2659	0.254336	0.00394047	0.376667	0.67944	0.0349383	0.516786	0.929419	1.28989	0.0639137	0.294481	0.888613	1.57946	0.078262	0.227636	0.937836	-0.0403244	-0.0330337	-0.0332486	-0.044792	-0.0505125	-0.0333586	-0.0476523	-0.0400381	-0.0418806
	Wtap	10.4578	0.266909	0.00366916	0.378571	2.36728	0.122156	0.116179	0.708286	0.300766	0.0153526	0.743118	0.97148	0.193636	0.00988413	0.825287	0.993926	-0.0630872	-0.0310235	-0.0224867	-0.0778855	-0.1181	-0.0273172	-0.0979929	-0.0545277	-0.0702935
	Ube2q2	10.4989	0.142452	0.00361371	0.38	2.32216	0.0483509	0.120615	0.718051	8.84446	0.240008	0.00141545	0.145833	8.93461	0.242454	0.00134528	0.466667	-0.0474591	-0.151265	0.0857452	-0.0711273	-0.0637503	-0.0244537	-0.0674388	-0.111282	0.0109974
	Sec24a	10.5196	0.239094	0.0035862	0.381481	1.67567	0.0787828	0.209238	0.79337	1.84106	0.0836887	0.181275	0.817916	1.72235	0.0782929	0.200897	0.925391	-0.0620634	-0.0777022	-0.0708079	-0.0235412	-0.0650201	-0.0790138	-0.0442807	-0.0533492	-0.067914
	Thap4	10.4109	0.288492	0.00468061	0.389231	1.88689	0.124065	0.180322	0.776719	0.996969	0.0552533	0.388479	0.918452	0.954316	0.0528894	0.40372	0.933816	0.295511	-0.163552	0.346957	0.367055	0.423609	0.159616	0.411994	0.178164	0.37636
	Plekhg6	14.3139	0.466181	0.0043265	0.392063	3.69535	0.240703	0.06736	0.604467	NA	NA	NA	NA	NA	NA	NA	NA	-0.249522	NA	-0.374558	NA	NA	-0.33424	-0.0747239	NA	-0.245996
	Gm11410	9.85602	0.264512	0.00459661	0.392188	0.664335	0.0406294	0.524214	0.929751	0.840398	0.0451085	0.444365	0.920718	0.697851	0.0374573	0.507887	0.962686	-0.0106662	-0.0208092	-0.00944229	-0.00598417	-0.00818176	-0.0145842	-0.00708297	-0.0129028	-0.00881202
	Ptprm	9.75346	0.236995	0.004779	0.392424	2.03018	0.098785	0.154182	0.749822	0.284489	0.0138254	0.755008	0.972109	1.88591	0.09165	0.174411	0.916277	-0.0552325	-0.126243	-0.0392065	-0.0137278	-0.0457324	-0.0808384	-0.0297301	-0.0687725	-0.0424694
	Itgb3bp	9.58142	0.261585	0.00510306	0.4	1.48715	0.0767703	0.246954	0.814938	0.476475	0.0260168	0.626962	0.956381	0.059819	0.00326627	0.942081	1.00222	0.0452284	0.0349905	0.00692133	0.07405	0.0651295	0.0192406	0.0695898	0.0559049	0.0360254
	Gm15922	18.5664	0.375708	0.00504362	0.401471	NA	NA	NA	NA	12.4253	0.502877	0.00735629	0.314159	NA	NA	NA	NA	0.16502	NA	0.330357	NA	NA	0.16502	NA	0.0547945	0.330357
	Ptchd4	9.74022	0.249059	0.00497538	0.401493	0.293716	0.0224062	0.748366	0.977463	2.94382	0.150548	0.0736409	0.67532	0.446412	0.0228296	0.645589	0.975363	-0.135598	-0.12367	-0.147386	-0.154388	-0.154113	-0.131768	-0.143805	-0.140198	-0.144733
	Cdca7	11.3893	0.442419	0.00552101	0.410959	NA	NA	NA	NA	1.17694	0.0914373	0.341406	0.908528	NA	NA	NA	NA	0.341913	0.194692	0.502311	NA	NA	0.348502	NA	0.312506	0.426032
	Snx13	9.449	0.275778	0.00536893	0.411268	0.22375	0.0154736	0.801235	0.979226	0.550507	0.0321341	0.584069	0.948905	0.132793	0.0077514	0.876312	0.997178	0.086768	0.119785	0.0958752	0.110124	0.0278823	0.10606	0.0690033	0.114217	0.0618788
	Casd1	9.39372	0.21058	0.00548441	0.413889	3.32724	0.147264	0.0538063	0.57376	1.27883	0.0573354	0.297424	0.891051	1.5015	0.0673184	0.243838	0.93228	0.0565528	0.105496	0.0982147	0.0364336	-0.0153374	0.105606	0.0105481	0.0709414	0.0414387
	Ppp1r35	9.56878	0.225982	0.00530703	0.414286	0.837395	0.0395528	0.446172	0.904167	4.50911	0.212979	0.0228489	0.47735	0.0406811	0.0019215	0.960207	1.00078	-0.141585	-0.254228	0.0373614	-0.291376	-0.0346213	-0.108433	-0.162999	-0.277302	-0.0058688
	Cldn25	9.31989	0.213866	0.0056429	0.416216	2.25807	0.0986095	0.127238	0.728072	1.6802	0.077112	0.208412	0.827597	1.69087	0.0776017	0.206481	0.927599	0.040977	0.0547409	0.0216062	0.0328378	0.0542697	0.0401833	0.0435537	0.0424857	0.0379379
	Ankmy2	9.09398	0.208913	0.00616004	0.41875	1.97135	0.0906691	0.162106	0.758753	2.07869	0.0955061	0.147965	0.789752	1.66796	0.0766349	0.210651	0.926725	0.0682414	0.170811	0.0312531	0.0284559	0.0489021	0.0975685	0.038679	0.0958783	0.0400776
	Pik3r3	9.62559	0.317562	0.00614543	0.422785	0.231053	0.0174317	0.796015	0.980159	0.647129	0.0426994	0.535303	0.936897	0.464477	0.0306475	0.635789	0.974439	0.314869	0.399427	0.294251	0.146636	0.432548	0.359495	0.262639	0.269021	0.358489
	Ugt1a2	9.04955	0.149457	0.00626775	0.423457	9.75818	0.340646	0.000854036	0.0843137	2.27114	0.0750177	0.125855	0.756103	2.22066	0.0733501	0.131285	0.898153	0.0214498	0.0695415	0.0309602	0.0052961	-0.012594	0.0495124	-0.00364896	0.0348178	0.00918308
	Ugt1a5	9.01933	0.149029	0.00634221	0.42439	9.75088	0.340501	0.000857412	0.0826923	2.27603	0.0752149	0.125342	0.758156	2.2238	0.0734888	0.130939	0.902575	0.0213995	0.0694054	0.0309602	0.0053857	-0.012789	0.0494605	-0.00370167	0.0348107	0.00908558
	Gm13067	12.6675	0.447451	0.00612751	0.426923	3.32141	0.234643	0.0831139	0.656006	NA	NA	NA	NA	NA	NA	NA	NA	-0.347742	NA	-0.534702	-0.314815	NA	-0.57869	-0.276201	-0.290123	-0.309212
	Ugt1a1	9.17258	0.148226	0.00597442	0.427632	10.6334	0.361845	0.000536989	0.0636364	2.19809	0.0710411	0.133793	0.766927	2.02331	0.0653924	0.155085	0.935837	0.0213556	0.070099	0.0318906	0.0041085	-0.0130071	0.0502236	-0.00444932	0.0343192	0.00944172
	Lman2	8.95255	0.207483	0.00651019	0.428916	0.361853	0.0162283	0.700279	0.97325	3.59881	0.166811	0.0436699	0.565079	1.63722	0.0758882	0.216388	0.932423	-0.0487874	-0.049117	-0.040401	-0.0990708	-0.00636091	-0.0455039	-0.0527158	-0.0735247	-0.023381
	Hmgxb4	9.18655	0.113227	0.00594208	0.430667	7.78704	0.221487	0.002615	0.14186	8.98504	0.221487	0.00130768	0.151163	7.70146	0.189846	0.0027522	0.56	-0.0112689	0	0	0	-0.0422582	0	-0.0211291	0	-0.0211291
	Rpl32	9.1099	0.150391	0.00612194	0.432468	1.32946	0.0506477	0.284204	0.828386	1.53399	0.0506477	0.236938	0.844881	11.3691	0.375372	0.000368695	0.8	-0.00249049	-0.00822235	0	0	-0.00317259	-0.00352386	-0.00158629	-0.00352386	-0.00158629
	Cmtm6	8.73163	0.16821	0.00710181	0.455294	7.42003	0.284823	0.00326154	0.156383	2.18139	0.0840464	0.135684	0.764317	0.487308	0.0187754	0.620477	0.973762	-0.0187668	0.00825229	-0.0133003	-0.0203828	-0.0487583	-0.00313035	-0.0345705	-0.00537004	-0.0310293
	Rnf141	8.77204	0.236144	0.00698933	0.459524	0.125623	0.00642199	0.882548	0.989651	1.3501	0.0726898	0.278997	0.882977	1.21173	0.0652397	0.315989	0.926349	0.023997	0.0153591	0.0300559	0.009662	0.03963	0.0235799	0.024646	0.0129027	0.0348429
	Wwtr1	8.44837	0.190734	0.00794869	0.462105	1.87841	0.0848031	0.175539	0.769029	1.31015	0.0591569	0.289169	0.884479	3.23427	0.146036	0.0578425	0.89701	-0.0242171	-0.0543228	-0.0176758	0.0109262	-0.036319	-0.0357795	-0.0126964	-0.0203352	-0.0269974
	AC122821.1	8.6604	0.220081	0.007305	0.462791	0.137931	0.00715371	0.871874	0.988723	3.15322	0.160261	0.0616303	0.633747	0.554125	0.0281633	0.582056	0.971576	0.0936988	0.12683	0.0421756	0.201539	0.00786071	0.0827855	0.1047	0.164584	0.0250182
	Far1	8.46062	0.214497	0.00790987	0.465957	1.6515	0.0918488	0.213702	0.795909	0.964383	0.0488988	0.396106	0.921337	1.37582	0.0697605	0.272656	0.934297	-0.0259537	-0.00659537	-0.00993096	-0.022923	-0.0583675	-0.00985689	-0.0406453	-0.0166749	-0.0341492
	Larp1	9.20838	0.299002	0.00788975	0.469892	1.00613	0.0653393	0.387627	0.881016	1.69837	0.110294	0.214353	0.832594	0.0898369	0.00583412	0.914538	0.999561	0.237172	0.45902	0.249099	0.161666	0.0856361	0.354059	0.132246	0.30265	0.163099
	Rbfox2	8.55766	0.241522	0.00760944	0.470787	0.800212	0.0402855	0.46135	0.913495	0.811694	0.0458167	0.456426	0.924552	0.325377	0.0183662	0.725526	0.983603	-0.0678907	-0.0718882	-0.113109	-0.0466836	-0.0356822	-0.0971291	-0.0411829	-0.0588403	-0.0743957
	Ssbp3	15.3119	0.718466	0.00786483	0.472826	NA	NA	NA	NA	NA	NA	NA	NA	NA	NA	NA	NA	-0.0946151	NA	NA	NA	NA	NA	-0.0977171	NA	-0.0976574
	Cops2	8.56883	0.237653	0.00757567	0.473864	1.32936	0.0699548	0.284229	0.828008	0.524294	0.0290822	0.59888	0.94919	0.389941	0.0216298	0.681488	0.975169	-0.0636109	-0.0722637	-0.118199	-0.0241306	-0.0352638	-0.0995112	-0.0296972	-0.0482477	-0.0767312
	Samsn1	10.525	0.457717	0.00781506	0.475824	0.734772	0.0639084	0.501744	0.922058	NA	NA	NA	NA	NA	NA	NA	NA	0.228635	0.161531	0.196485	0.324797	NA	0.175512	0.324797	0.244913	0.196485
	Diexf	8.83848	0.296663	0.00751949	0.477011	0.477278	0.0320395	0.627358	0.954573	NA	NA	NA	NA	NA	NA	NA	NA	0.212366	NA	0.203502	0.159752	0.346267	0.132505	0.25301	0.118191	0.289355
	Klra2	127.217	0.984522	0.00776907	0.478889	NA	NA	NA	NA	NA	NA	NA	NA	NA	NA	NA	NA	-0.594363	NA	NA	NA	NA	NA	NA	NA	NA
	Usb1	8.24905	0.196455	0.00861119	0.488889	0.125765	0.00844844	0.882425	0.989725	3.1317	0.149166	0.0626809	0.635845	2.11276	0.100633	0.143762	0.930412	0.11735	0.0769248	0.113832	-0.0427112	0.314349	0.0970944	0.135819	0.0150933	0.21409
	Klc1	8.25173	0.23586	0.00860191	0.491837	0.33758	0.0177474	0.716971	0.974862	1.39491	0.0797419	0.268048	0.871455	0.134497	0.00768869	0.874838	0.996871	0.0387269	0.0211596	0.0366356	0.0549181	0.0430294	0.0279969	0.0489737	0.0391129	0.0398325
	Adh1	8.29009	0.178245	0.00846996	0.492708	1.42077	0.0597483	0.261943	0.820997	2.79079	0.12001	0.082201	0.686589	3.39814	0.146127	0.0509338	0.906107	-0.0634897	-0.107585	-0.0807436	-0.0656636	0.00899243	-0.100531	-0.0283356	-0.0899755	-0.0358756
	Ppp2r3a	8.25694	0.246747	0.00858387	0.495876	0.647469	0.0402296	0.532646	0.93106	0.231067	0.0138102	0.795506	0.975814	0.224585	0.0134228	0.800579	0.993236	-0.0638585	-0.00685447	-0.0653109	-0.0865639	-0.0899593	-0.0378913	-0.0882616	-0.0491198	-0.0776351
	Trpc4ap	8.00659	0.190747	0.00950045	0.496262	1.09184	0.0519269	0.352372	0.869442	0.0644015	0.00306857	0.937797	0.994574	4.32796	0.206216	0.0253887	0.962393	0.0316547	0.0262278	0.0170528	0.0400039	0.0490101	0.018595	0.044507	0.0304468	0.0330315
	Acot1	21.8673	0.845365	0.00947411	0.5	NA	NA	NA	NA	NA	NA	NA	NA	NA	NA	NA	NA	0.266587	NA	0.225687	NA	NA	0.225687	NA	NA	0.266587
	Ubxn7	8.0297	0.205708	0.00941146	0.500952	2.44655	0.118739	0.108807	0.697482	0.591791	0.0303215	0.561543	0.943956	0.964012	0.0493929	0.396241	0.948393	-0.0449846	-0.0486164	-0.0496308	-0.018509	-0.0694557	-0.0484794	-0.0439823	-0.0286143	-0.0595433
	Cmc1	8.05718	0.208956	0.00930688	0.500971	1.77334	0.0880948	0.192199	0.781798	0.228448	0.0118492	0.797552	0.975897	1.74926	0.0907311	0.196255	0.921576	0.105506	0.159624	0.182265	0.00368527	0.0732368	0.177847	0.0384611	0.0805125	0.127751
	Mib2	10.2975	0.402382	0.00934837	0.501923	NA	NA	NA	NA	2.6469	0.20686	0.119515	0.758984	NA	NA	NA	NA	0.259157	0.121796	0.265365	NA	NA	0.193581	NA	0.127781	0.324838
	Lgals3	8.14077	0.119678	0.00899643	0.503	10.9372	0.32527	0.000459065	0.0675	7.14381	0.210043	0.00386256	0.247368	0.359698	0.0105759	0.701744	0.984167	0.0344691	-0.00598552	0.0271874	0.0398065	0.0820858	0.0095787	0.0609461	0.0156843	0.0546366
	Gm26359	8.22032	0.24768	0.00922595	0.503922	1.40719	0.0850822	0.266987	0.822002	0.176373	0.0106283	0.839534	0.979613	0.400902	0.0241586	0.674733	0.975791	0.163671	0.265998	0.24212	0.1309	0.0544525	0.254059	0.0909803	0.193243	0.133144
	Gm21967	8.09716	0.187183	0.00915696	0.505941	1.57287	0.0729152	0.228961	0.808987	1.02225	0.0472628	0.375559	0.918572	3.48532	0.161141	0.0476285	0.907819	0.0869005	0.110513	0.012783	0.089808	0.158603	0.0496486	0.124205	0.091199	0.0856928
	Chad	16.4552	0.766957	0.00976263	0.510185	NA	NA	NA	NA	NA	NA	NA	NA	NA	NA	NA	NA	0.745776	NA	NA	NA	NA	NA	0.661035	NA	NA
	Gabarap	7.8044	0.16758	0.0103198	0.511504	0.275458	0.0147023	0.761693	0.975174	2.2171	0.0952129	0.131677	0.762938	5.39089	0.231511	0.0120232	0.865	0.0178499	-0.0233391	0.0427695	0.026215	0.0185616	0.012951	0.0223883	0.00415193	0.0306655
	Gm23751	7.80936	0.202402	0.0102988	0.513393	2.06908	0.110928	0.149175	0.743807	0.729051	0.0377909	0.493184	0.934988	1.08891	0.0564442	0.353316	0.93809	-0.077043	-0.198358	-0.0744573	-0.00674342	-0.0456823	-0.130027	-0.0262129	-0.0970036	-0.0600698
	Gnptg	7.83203	0.179999	0.0102034	0.514414	2.03678	0.0934863	0.15332	0.750223	3.46205	0.159133	0.0484871	0.57494	0.840895	0.0386516	0.444159	0.955156	-0.0498943	-0.0872577	0.0352772	-0.0914148	-0.0612277	-0.0232614	-0.0763212	-0.087474	-0.0129752
	Slc16a12	7.83208	0.136293	0.0104691	0.516667	3.80789	0.147001	0.0380097	0.530303	7.18765	0.250156	0.00396075	0.246154	2.82104	0.0981825	0.0811654	0.912919	0.0462017	-0.00677453	0.0167185	0.00570757	0.18701	0.00283903	0.0872394	0.000592059	0.0967899
	Abcg1	7.84979	0.156526	0.0101293	0.517273	8.52389	0.340782	0.0016991	0.10411	0.892358	0.0355875	0.423404	0.913647	0.2339	0.00932799	0.793301	0.993181	-0.0275027	-0.0129606	0.00793444	-0.0518011	-0.0566769	-0.000969055	-0.054239	-0.0317163	-0.0243712
	Pcnxl4	7.71013	0.16567	0.0107282	0.517949	0.204843	0.00804281	0.816245	0.979701	7.59299	0.326306	0.00293748	0.206061	0.116643	0.00501267	0.890426	0.996665	-0.118178	-0.265452	-0.0278284	-0.194458	-0.0175072	-0.129546	-0.105983	-0.229492	-0.0226678
	Il16	9.05977	0.410692	0.0100449	0.518349	NA	NA	NA	NA	NA	NA	NA	NA	NA	NA	NA	NA	-0.310208	NA	NA	NA	-0.221607	NA	-0.252822	NA	-0.223274
	Top3a	20.4081	0.83612	0.0106785	0.518966	NA	NA	NA	NA	NA	NA	NA	NA	NA	NA	NA	NA	-0.497866	NA	NA	NA	NA	NA	NA	-0.495733	NA
	1600012H06Rik	7.79496	0.236492	0.0106281	0.522609	0.696545	0.0441215	0.508963	0.924453	0.368306	0.0223481	0.696091	0.967621	0.518093	0.0314369	0.602744	0.976481	-0.0774544	-0.0967341	-0.115635	-0.0966324	-0.00563659	-0.107534	-0.0511345	-0.096676	-0.0606356
	Zfp770	7.65003	0.225814	0.0109979	0.527966	0.270108	0.0189736	0.765685	0.976132	1.0106	0.0596617	0.379602	0.921579	0.333068	0.019663	0.720121	0.985962	-0.0804514	-0.137907	-0.0423991	-0.114396	-0.041862	-0.0844005	-0.0781292	-0.12192	-0.0421305
	Golga5	7.5884	0.238983	0.0112822	0.535833	0.456381	0.0293736	0.639187	0.959944	0.112371	0.00707783	0.894201	0.986994	0.0134773	0.000848888	0.986621	1.0029	-0.028127	-0.028247	-0.0305695	-0.0280197	-0.0237518	-0.0298686	-0.0258857	-0.0288485	-0.0271606
	Gm13142	10.7392	0.573088	0.0112368	0.536975	NA	NA	NA	NA	NA	NA	NA	NA	NA	NA	NA	NA	-0.528609	NA	NA	NA	-0.625822	NA	-0.499702	NA	-0.693531
	Pde5a	7.54568	0.175002	0.0114841	0.543802	0.535866	0.028598	0.592292	0.952484	2.36026	0.10948	0.116857	0.760483	3.38983	0.157236	0.0512619	0.906084	0.0500545	0.0804146	0.0102701	0.082885	0.0296884	0.0446166	0.0562867	0.0838186	0.0199792
	Dnaja2	7.42156	0.180289	0.0120936	0.554032	4.75662	0.230316	0.0186715	0.388655	0.189621	0.00921282	0.828553	0.97819	0.425335	0.020665	0.658588	0.974081	-0.0477079	-0.0360947	-0.00349457	-0.0680898	-0.0726508	-0.0201224	-0.0703703	-0.057649	-0.0380727
	Ptpn22	7.79028	0.190429	0.0125378	0.554688	8.05944	0.394016	0.00345282	0.158763	NA	NA	NA	NA	NA	NA	NA	NA	-0.121317	-0.0369557	-0.0361531	-0.275537	NA	-0.0336675	-0.275537	-0.173288	-0.0361531
	Olr1	8.013	0.290779	0.012052	0.556098	1.77198	0.128605	0.201772	0.791991	NA	NA	NA	NA	NA	NA	NA	NA	0.0887025	0.0390193	0.19662	0.0642129	NA	0.105029	0.0642129	0.0570921	0.19662
	Cdv3	7.34218	0.185822	0.0125021	0.55748	1.83297	0.0898307	0.182543	0.776312	2.39047	0.121	0.113968	0.75668	0.361402	0.0182933	0.700585	0.983802	-0.0236204	-0.0418155	-0.0377096	-0.0243719	0.00916977	-0.0408869	-0.00760108	-0.0324631	-0.0142699
	Setd8	7.43642	0.166869	0.0120188	0.560656	0.193621	0.0075693	0.825299	0.980747	0.688774	0.0309115	0.512253	0.932205	6.18154	0.277421	0.00710468	0.82	0.0440466	0.0807144	0.00784337	0.0098165	0.0755773	0.0461766	0.0426969	0.045222	0.0417103
	Mettl16	7.36429	0.176364	0.0123868	0.5608	1.88564	0.0899973	0.174451	0.769607	0.734844	0.0351969	0.490505	0.936032	3.07547	0.147306	0.0655189	0.911607	0.0443037	0.0402871	0.0841403	0.035276	0.00637258	0.0679943	0.0208243	0.0419142	0.0452564
	Gp49a	7.23796	0.0877862	0.0130618	0.561069	15.2161	0.384817	6.1679e-05	0.05	5.89578	0.143015	0.00856882	0.323256	4.99408	0.121142	0.0158034	0.947945	-0.0368359	-0.0175413	-0.0530121	-0.0619897	-0.0226173	-0.0361916	-0.0423035	-0.0388514	-0.0378147
	Znhit1	8.20732	0.301235	0.0124791	0.561111	2.51912	0.184919	0.116281	0.708163	NA	NA	NA	NA	NA	NA	NA	NA	0.281239	0.357692	NA	0.219032	0.336227	0.340979	0.284535	0.269786	0.355215
	Chpt1	7.27631	0.145782	0.0128527	0.562791	2.4147	0.0880126	0.111706	0.703412	5.9377	0.237926	0.00833488	0.32126	1.46549	0.058723	0.251739	0.932436	0.0156733	-0.00311016	0.0173989	0.0179892	0.0277131	0.00728307	0.0228511	0.00963512	0.022556
	Thtpa	7.24803	0.172916	0.0130065	0.564615	0.058936	0.00284573	0.942909	0.992479	3.5242	0.168154	0.0462299	0.581378	2.25103	0.107406	0.127988	0.897365	0.0620212	0.0815767	0.0338927	0.122937	0.0130284	0.055991	0.0679825	0.100039	0.0234605
	6330403A02Rik	8.93542	0.471889	0.0135918	0.57803	NA	NA	NA	NA	NA	NA	NA	NA	NA	NA	NA	NA	-0.175022	NA	NA	NA	-0.23741	NA	-0.191059	NA	-0.21446
	Ifngr1	7.07114	0.158116	0.0140163	0.585926	1.18139	0.0528468	0.324792	0.849057	3.74814	0.167623	0.0389969	0.567353	2.39548	0.10713	0.113495	0.89736	-0.0280873	-0.0827999	0.000308788	-0.0131358	-0.020511	-0.0393468	-0.0168234	-0.0457848	-0.0101011
	Lsm14b	7.07662	0.182484	0.0139838	0.589552	1.92017	0.0952626	0.169359	0.772149	0.432255	0.0222931	0.654208	0.95796	1.99892	0.103092	0.158339	0.933774	-0.0643501	-0.10715	0.0174361	-0.064542	-0.0992833	-0.0425529	-0.0819126	-0.089242	-0.0409236
	C4b	6.8968	0.130456	0.0150971	0.590278	4.79294	0.179921	0.0181983	0.385408	0.428202	0.0161993	0.65677	0.959101	6.26382	0.236967	0.00673528	0.833333	-0.0121534	-0.0195711	0.00095362	0.00102202	-0.0293284	-0.00903675	-0.0141532	-0.010251	-0.0141874
	Dkk3	7.00429	0.14742	0.0144203	0.591304	1.82259	0.0646059	0.184185	0.777625	6.38574	0.268802	0.00622582	0.297059	0.545806	0.0229752	0.586695	0.973364	0.0890298	0.149398	0.0480258	0.175068	-0.00765853	0.0903042	0.0837045	0.169541	0.0201837
	4932702P03Rik	7.07283	0.165596	0.0150525	0.591608	3.9712	0.208637	0.035291	0.517391	2.0461	0.0958106	0.155431	0.793069	1.80193	0.0843774	0.190752	0.925781	0.11413	0.111329	0.0451536	0.213001	0.0856347	0.067212	0.149318	0.17911	0.0653941
	Tjp1	7.09801	0.220682	0.0138575	0.591729	0.817872	0.0480747	0.4538	0.909048	0.124815	0.00776118	0.883254	0.986696	0.0902862	0.00561412	0.913992	0.999519	0.0526194	0.0659569	0.0614515	0.029711	0.0574879	0.0638824	0.0435994	0.0446711	0.0594697
	Sulf2	6.96892	0.197407	0.0146392	0.593525	2.20514	0.123047	0.133004	0.734924	0.0125506	0.000711039	0.987535	0.999089	0.448999	0.0254374	0.643743	0.975178	-0.0241657	-0.00567001	-0.00864093	-0.0436412	-0.0362935	-0.0065747	-0.0399673	-0.0261292	-0.0224672
	B3galt4	6.95114	0.192818	0.0147506	0.593571	0.228229	0.0180906	0.797723	0.980318	2.44032	0.135384	0.109367	0.748054	0.381037	0.0211392	0.687385	0.977691	-0.121948	-0.172876	-0.143616	-0.137036	-0.0622983	-0.147224	-0.0996669	-0.149027	-0.102957
	Acss2	6.93318	0.153325	0.0148641	0.593617	0.731778	0.0301942	0.491921	0.920451	5.30695	0.234723	0.0127321	0.408553	1.60412	0.070949	0.222759	0.93875	0.0363811	-0.0100881	0.0547091	0.0530224	0.0355519	0.0289364	0.0442871	0.023969	0.0451305
	9630033F20Rik	7.00718	0.199497	0.0144025	0.594891	0.0771057	0.00270375	0.92603	0.990404	1.35249	0.077012	0.2784	0.882769	1.12892	0.0642818	0.340653	0.933476	-0.0467856	-0.0579505	-0.047881	0.00795242	-0.0882336	-0.0539569	-0.0401406	-0.0227013	-0.0680573
	AV039307	6.91103	0.176347	0.0150055	0.595775	1.75648	0.0952201	0.195029	0.787947	2.1712	0.110804	0.136851	0.765137	0.711776	0.0363244	0.501266	0.960621	-0.126332	-0.333009	-0.110396	-0.12409	0.0449296	-0.2185	-0.0395802	-0.225519	-0.0327331
	Gm7120	7.02151	0.169554	0.014315	0.596324	1.35815	0.0653256	0.276996	0.826103	1.02845	0.0496696	0.373427	0.916092	3.30848	0.159785	0.0545951	0.890459	0.0912561	0.131052	-0.00522818	0.093058	0.173241	0.0490062	0.133149	0.102386	0.0840063
	Gtf3c3	6.79743	0.184934	0.0157542	0.605479	0.119265	0.00652074	0.888118	0.991415	0.271473	0.0147717	0.764664	0.973552	3.08853	0.168056	0.0648472	0.909281	-0.0464967	-0.0379277	-0.0715152	-0.0700052	-0.0111901	-0.0523732	-0.0405976	-0.0528241	-0.0413526
	Itga7	6.81745	0.116529	0.0156193	0.605517	3.57303	0.141476	0.0445367	0.54067	9.69125	0.331301	0.000885575	0.110811	1.07909	0.0368892	0.356501	0.935026	-0.0189684	0.0050251	-0.0196399	-0.0347618	-0.016573	-0.0105547	-0.0256674	-0.0177478	-0.0181064
	Ptp4a2	6.77103	0.185254	0.0159341	0.608844	1.17527	0.0653316	0.326602	0.851123	0.723596	0.0395949	0.495721	0.933198	1.4906	0.0815651	0.246201	0.934079	-0.014895	-0.0138085	-0.026479	-0.0053227	-0.0137132	-0.020174	-0.00951794	-0.00904817	-0.0200961
	Gdf3	10.9123	0.6398	0.0163391	0.612	0.0717462	0.00841314	0.931553	0.990334	NA	NA	NA	NA	NA	NA	NA	NA	0.149383	NA	NA	0.158009	NA	0.140756	0.158009	0.147483	NA
	Src	6.68869	0.185666	0.0165098	0.613245	2.11476	0.119707	0.143519	0.741816	0.377046	0.0209322	0.690046	0.966941	0.676516	0.0375578	0.518215	0.963242	-0.0681689	-0.0646986	-0.114099	-0.0417413	-0.0467353	-0.0904197	-0.0442383	-0.0538681	-0.0804173
	Gm10309	10.9248	0.645491	0.0163005	0.613423	NA	NA	NA	NA	NA	NA	NA	NA	NA	NA	NA	NA	0.403677	NA	NA	NA	0.5	NA	0.405626	NA	0.506173
	Ptrf	6.71993	0.153018	0.0162887	0.616216	1.35764	0.0549467	0.277123	0.825983	3.2958	0.150095	0.0551359	0.601109	2.44465	0.111333	0.108978	0.906597	-0.0108624	-0.0130544	-0.00600318	-0.00331143	-0.0199159	-0.0105329	-0.0116137	-0.0078758	-0.0129596
	Pgm2	6.63627	0.179875	0.0168884	0.620395	1.5547	0.0811298	0.232651	0.811042	0.401398	0.0217596	0.673982	0.963601	1.67268	0.0906754	0.209784	0.928534	0.0158654	0.0192724	0.00187494	0.0109967	0.0322426	0.00908695	0.0216197	0.0149883	0.0170588
	Cnpy2	6.60439	0.19945	0.0171233	0.62549	1.21934	0.068158	0.313821	0.847451	0.481525	0.0290837	0.62393	0.955802	0.0534274	0.00322698	0.948092	1.002	0.0379335	0.0520145	0.0684791	-0.000895543	0.0334226	0.061472	0.0162635	0.0234478	0.0509509
	Il33	6.59265	0.154523	0.0172107	0.627922	5.82719	0.273138	0.0089671	0.272848	0.192578	0.00902752	0.826147	0.979497	0.516195	0.0241978	0.603539	0.976981	0.0448309	0.0770811	0.0772878	0.0230885	-0.00346419	0.0789954	0.00981216	0.0528045	0.0369118
	Epb4.1l2	6.55714	0.0702783	0.0174782	0.632258	10.1797	0.25614	0.000681431	0.0702128	20.2272	0.433583	8.54207e-06	0.05	1.46577	0.0314198	0.251677	0.933722	-0.0190483	0.0329192	0.00471023	-0.0110335	-0.0899988	0.0151594	-0.0505161	0.00880197	-0.0426443
	Cul9	6.42325	0.201185	0.0185289	0.634146	0.280485	0.0164989	0.757964	0.975617	0.391	0.0244933	0.680791	0.964328	0.58046	0.0363615	0.56763	0.968436	-0.169522	-0.120783	-0.265809	-0.119815	-0.18348	-0.191844	-0.151648	-0.111985	-0.224644
	Rdh13	6.42935	0.197826	0.0184796	0.635583	0.0489698	0.00385373	0.952309	0.995296	0.920319	0.056635	0.412571	0.912341	0.566038	0.0348331	0.575481	0.971641	0.129372	0.189773	0.0832107	0.0764034	0.187725	0.127579	0.132064	0.127579	0.135468
	Map3k11	6.42984	0.203979	0.0184756	0.639506	0.225056	0.0136039	0.800209	0.978875	0.713084	0.0452435	0.500649	0.932582	0.107978	0.00685096	0.898099	0.997516	-0.0468969	-0.0638193	-0.0122131	-0.0769375	-0.038584	-0.0356478	-0.0577608	-0.0698071	-0.0253986
	Acad8	6.43503	0.186382	0.0184338	0.640994	1.77798	0.103107	0.191428	0.782101	0.218573	0.0126613	0.805315	0.976994	0.548944	0.0317988	0.584941	0.973804	0.0996843	0.126344	0.0896222	0.112399	0.0755728	0.110876	0.0939859	0.116645	0.0825975
	Prdm16	6.89196	0.235757	0.0183727	0.645	1.847	0.126258	0.189797	0.781446	0.00829245	0.000567327	0.991746	0.998696	1.31542	0.0899942	0.29587	0.932469	0.216807	0.188715	0.420089	0.192088	-0.0138331	0.327006	0.0735248	0.230047	0.20735
	Gm17017	6.44851	0.203663	0.0183254	0.647799	0.343428	0.0218219	0.71291	0.974809	0.697444	0.0440547	0.508082	0.932504	0.0662001	0.00418159	0.936121	1.00349	-0.0569006	-0.0850719	-0.0524006	-0.0678657	-0.0244793	-0.0693969	-0.0461725	-0.0753725	-0.03844
	Dpep1	6.46315	0.189961	0.0182086	0.648101	1.29497	0.0751104	0.293139	0.841658	0.967285	0.0568598	0.395047	0.920258	0.0179137	0.00105302	0.98226	1.00235	0.0286921	0.0280646	0.000476594	0.0512437	0.0319697	0.0140367	0.0416067	0.041386	0.0162232
	Etf1	6.46796	0.124592	0.0181705	0.651592	6.02283	0.230981	0.00788091	0.262143	0.486134	0.0187287	0.621177	0.955812	4.71369	0.181599	0.019248	0.909783	0.0275578	-0.0402521	0.0494623	0.0697633	0.0267067	0.00759089	0.048235	0.0164058	0.0380845
	Ugt1a6a	6.47709	0.122442	0.0180982	0.653846	7.95507	0.319179	0.00236673	0.134524	2.05305	0.0776214	0.151216	0.785671	1.70292	0.0643838	0.204324	0.928494	0.0185999	0.0638838	0.0274728	0.00398691	-0.0138869	0.0448808	-0.00495002	0.0315163	0.00679292
	Nrg4	6.35068	0.118085	0.0191276	0.653939	8.55496	0.317164	0.00166907	0.1	1.46527	0.0544907	0.251788	0.853231	2.19477	0.0816193	0.134167	0.905168	0.0235425	-0.0155178	0.0130283	0.0710903	0.0218524	0.00113939	0.0464713	0.0290402	0.0174403
	Tln1	6.31451	0.161709	0.019434	0.666265	3.76751	0.191749	0.0384318	0.529348	0.178284	0.00913139	0.83785	0.979217	0.921284	0.0471864	0.412202	0.939594	-0.0591742	0.0211272	-0.0275243	-0.149747	-0.0745777	-0.00490041	-0.112162	-0.0687132	-0.051051
	Ehd4	6.29363	0.162898	0.0196134	0.669461	0.0558268	0.00404004	0.945831	0.993324	1.02475	0.0530474	0.374696	0.917791	3.59033	0.185857	0.043953	0.907589	-0.0374263	0.00520958	-0.0585218	-0.0719012	-0.0118755	-0.0325262	-0.0418883	-0.0383578	-0.0351986
	Cgnl1	5.72648	0.182576	0.0252654	0.671364	0.419649	0.0266795	0.662209	0.9652	0.483265	0.0308156	0.622889	0.956361	0.416322	0.0265469	0.664339	0.975691	0.0141344	0.029153	0.0102747	0.00807917	0.0104097	0.0192285	0.00924446	0.0178917	0.0103422
	Cmklr1	5.72702	0.184403	0.0252592	0.673973	0.0861397	0.00537358	0.917761	0.989702	0.136294	0.00877701	0.873286	0.986245	0.942565	0.060699	0.404167	0.934283	-0.0330695	-0.0516142	-0.0101906	-0.0332542	-0.0424682	-0.028147	-0.0378612	-0.0404213	-0.0263294
	Ptprf	5.70481	0.17547	0.0259303	0.675111	2.4034	0.147849	0.113751	0.704751	NA	NA	NA	NA	NA	NA	NA	NA	0.163355	NA	-0.0942171	0.174283	0.182282	0.0541888	0.178283	0.227666	0.107431
	Gm25636	6.25415	0.173847	0.0199576	0.67574	0.491071	0.0273256	0.618242	0.953856	0.156894	0.00872238	0.855702	0.982562	2.7125	0.150799	0.0875618	0.92	-0.0381709	-0.00477429	-0.0889322	-0.0562068	0.00240335	-0.0495513	-0.0269017	-0.0331901	-0.0432644
	Myo1b	5.62607	0.167832	0.0264442	0.675983	0.871807	0.0520249	0.431563	0.894154	0.144962	0.00864875	0.865839	0.983857	1.43124	0.0853907	0.259516	0.92472	-0.12887	-0.151611	-0.0217299	-0.0628409	-0.273289	-0.0828846	-0.168065	-0.110463	-0.14751
	Rnf150	5.67863	0.111536	0.0258197	0.676233	2.42242	0.11322	0.110996	0.699882	6.38695	0.250896	0.00622096	0.3	2.3079	0.0906604	0.122055	0.895859	0.0285838	0.0687129	0.0112509	0.0260395	0.019357	0.0366491	0.0226983	0.0454688	0.015304
	Tcp11l1	5.63296	0.162969	0.0263614	0.676316	0.727099	0.0415644	0.494089	0.91967	1.06205	0.0614527	0.362102	0.904764	1.17669	0.0680861	0.326182	0.929743	-0.0577985	-0.0786515	0.00317216	-0.0808747	-0.0797877	-0.0349463	-0.0803312	-0.0806629	-0.0383077
	Arhgap11a	5.70921	0.171577	0.0258791	0.676339	0.71455	0.0352168	0.500423	0.920444	1.30586	0.0784892	0.291132	0.8874	0.762389	0.0458238	0.478485	0.957616	0.0741645	0.0163806	0.113179	0.0704223	0.1134	0.0538826	0.0919112	0.0407094	0.112747
	Gm24362	5.72733	0.140912	0.0252556	0.677064	0.488393	0.0341527	0.619832	0.953705	3.98047	0.195866	0.0327725	0.550676	1.48991	0.0733136	0.246351	0.93244	0.0487893	-0.0428068	0.0883006	0.0232927	0.10406	0.0319777	0.0636764	-0.00374453	0.0961804
	RP23-161N17.14	5.72733	0.140912	0.0252556	0.677064	0.488393	0.0341527	0.619832	0.953705	3.98047	0.195866	0.0327725	0.550676	1.48991	0.0733136	0.246351	0.93244	0.0487893	-0.0428068	0.0883006	0.0232927	0.10406	0.0319777	0.0636764	-0.00374453	0.0961804
	Gm4524	6.10671	0.156773	0.0216875	0.677174	1.86812	0.111078	0.178096	0.774112	2.29595	0.117884	0.124282	0.757024	1.25891	0.0646382	0.303632	0.930552	-0.134169	-0.176709	-0.141161	-0.166984	-0.0624567	-0.156396	-0.11472	-0.171152	-0.101809
	Polr3gl	5.69379	0.165017	0.0256426	0.677376	0.607953	0.0358147	0.552983	0.936134	0.409381	0.0237294	0.668805	0.962019	1.88786	0.109428	0.174119	0.919037	0.0545095	0.0744728	0.0716871	0.0673196	-0.000970024	0.0764757	0.0331748	0.074637	0.0353585
	CAAA01201205.1	5.85022	0.13056	0.0257799	0.677477	4.50176	0.20703	0.0250981	0.4425	1.4945	0.0667054	0.249579	0.851384	3.98306	0.17778	0.0359239	0.936723	-0.143625	0.0352444	-0.215291	-0.416115	0.0058072	-0.0900232	-0.211957	-0.190435	-0.0998818
	1110032A03Rik	6.26256	0.144269	0.0198836	0.677976	0.204821	0.00962337	0.816263	0.979521	4.86007	0.22392	0.0173579	0.453158	2.00827	0.0925279	0.157083	0.930556	0.0368552	0.0661467	0.0211604	0.0598993	0.00214657	0.0425896	0.0310229	0.0611863	0.0116535
	Gm15448	7.3402	0.416087	0.0266878	0.678261	NA	NA	NA	NA	1.1504	0.130424	0.36381	0.904463	NA	NA	NA	NA	0.205512	0.280023	0.0519344	NA	NA	0.188787	NA	0.280023	0.0519344
	Phtf1	5.63417	0.125465	0.0263468	0.679295	4.07213	0.187596	0.0306212	0.480442	0.866659	0.0385986	0.433633	0.914367	3.19724	0.142396	0.0595407	0.9	-0.118992	-0.10282	-0.0911856	-0.248605	-0.035941	-0.103843	-0.142273	-0.179568	-0.0635633
	Creb3l1	6.58396	0.354847	0.0262403	0.680531	0.485194	0.0522997	0.628152	0.954722	NA	NA	NA	NA	NA	NA	NA	NA	-0.303588	NA	-0.20212	-0.607843	NA	-0.202863	-0.418845	-0.4377	-0.140919
	Dstn	6.07013	0.124272	0.0216529	0.680874	2.57356	0.0950936	0.0980348	0.677184	2.35496	0.0964247	0.117372	0.760809	4.95917	0.203055	0.0161933	0.954054	0.0376845	-0.00541172	0.0958296	0.00535029	0.0463572	0.0525733	0.0258538	0.0016177	0.0710934
	Vps13c	5.73568	0.164559	0.0251604	0.681481	0.496331	0.0272501	0.615131	0.952984	0.0958183	0.00549814	0.90899	0.989412	2.46741	0.141582	0.106953	0.903169	-0.0239605	-0.0524811	-0.0189141	0.00801584	-0.0383544	-0.0336405	-0.0151693	-0.0189403	-0.0286343
	Dcp2	5.74501	0.0759755	0.0250544	0.68186	3.97997	0.112	0.0327846	0.49697	17.6662	0.467258	2.24857e-05	0.0222222	1.78958	0.0473331	0.189516	0.930336	-0.0144049	0.00730863	-0.00223965	-0.00484036	-0.0509489	-0.000650563	-0.0278946	0.000914017	-0.0265943
	Tcof1	6.02358	0.18798	0.0221067	0.682353	1.09794	0.0660786	0.350413	0.86875	0.324434	0.0202494	0.726191	0.971041	0.0877329	0.00547581	0.916311	0.999937	0.110772	0.142457	0.199191	0.0138613	0.0949286	0.173302	0.054395	0.0725756	0.14706
	Phf10	8.55655	0.550029	0.0221766	0.682447	NA	NA	NA	NA	NA	NA	NA	NA	NA	NA	NA	NA	-0.0468474	NA	NA	NA	NA	NA	-0.0699278	NA	-0.0497886
	Hspa13	6.07323	0.117656	0.021623	0.682967	0.48543	0.0182577	0.621596	0.953902	1.25995	0.0488177	0.302525	0.893436	9.52733	0.369143	0.000968296	0.6	0.0152296	0.0256168	0.00163659	-0.0116555	0.0458221	0.0136472	0.0170833	0.00645323	0.0237294
	Ei24	5.56029	0.144291	0.0272497	0.683333	4.05033	0.209565	0.0311185	0.479814	0.0010636	5.52016e-05	0.998937	1.00008	0.936092	0.0485836	0.406593	0.935297	-0.0284672	-0.0153189	0.00096644	-0.0407015	-0.055678	-0.00547494	-0.0481897	-0.0297672	-0.0273558
	Clstn2	5.6247	0.160953	0.0268826	0.68355	3.66073	0.209507	0.0424236	0.53609	NA	NA	NA	NA	NA	NA	NA	NA	0.1225	NA	0.229311	0.0366667	0.0557409	0.220442	0.0462038	0.0977778	0.142489
	Fbxl19	6.35196	0.219716	0.0220125	0.683784	2.77898	0.192251	0.0903164	0.669874	NA	NA	NA	NA	NA	NA	NA	NA	0.133436	NA	0	NA	0.41713	0	0.200155	0.0733333	0.208565
	Twsg1	5.56588	0.126864	0.0271802	0.684549	4.27908	0.197135	0.0263079	0.453684	2.10134	0.0957923	0.145156	0.781447	1.27305	0.0580336	0.298977	0.931765	0.0335081	0.116763	0.0354321	0.00192469	-0.0141277	0.0753645	-0.00610148	0.0568034	0.0106522
	Ccdc28b	5.75302	0.152932	0.0249637	0.684579	0.79095	0.0364092	0.465363	0.913086	3.6352	0.193268	0.0424777	0.571233	0.00643731	0.000342244	0.993585	1.00263	0.0479657	0.0799874	-0.0267634	0.119672	0.0201911	0.0237385	0.0699317	0.101814	-0.00328613
	Flcn	6.08033	0.131846	0.0215548	0.685083	3.63255	0.157231	0.0425633	0.533582	1.34485	0.0583236	0.280311	0.881427	3.54091	0.153562	0.0456429	0.903846	0.0640073	0.132972	-0.0634879	0.060294	0.138416	0.0303415	0.0993548	0.0901242	0.0374639
	Sulf1	6.02445	0.137046	0.0220982	0.686022	5.44634	0.241424	0.0115785	0.301111	0.816913	0.0371667	0.454207	0.923687	1.20418	0.0547863	0.318154	0.92787	0.0240101	-0.0109738	0.0390081	0.0324276	0.0329608	0.0168683	0.0326942	0.0108328	0.0359844
	Mogat1	5.6068	0.174651	0.0271007	0.686638	2.24804	0.140052	0.129315	0.732845	NA	NA	NA	NA	NA	NA	NA	NA	0.139215	0.228678	0.2279	NA	-0.0907582	0.228234	0.019613	0.238594	0.0685711
	Smim15	5.75467	0.173558	0.0249451	0.687324	0.578453	0.0348918	0.568716	0.94219	0.261332	0.0157634	0.772281	0.976721	1.36136	0.0821163	0.2762	0.932339	0.00592366	0	0.00815224	0.0093637	0.00617871	0.00407612	0.0077712	0.00468185	0.00716548
	Tfr2	5.86843	0.228614	0.0276522	0.688085	1.90059	0.148081	0.181732	0.776143	NA	NA	NA	NA	NA	NA	NA	NA	-0.0330353	-0.00902865	NA	-0.0690294	NA	-0.00137581	-0.0552235	-0.0417732	0
	Stxbp3a	6.12724	0.157099	0.0211102	0.688636	2.23311	0.115667	0.129922	0.729979	2.69454	0.138173	0.0888441	0.707512	0.00996388	0.000510936	0.99009	1.00295	-0.092067	-0.172051	-0.0704411	-0.101253	-0.0160368	-0.122919	-0.0586451	-0.139457	-0.043239
	Gpx3	6.0831	0.126113	0.0215283	0.688889	0.283366	0.0176667	0.755836	0.975558	7.03481	0.291688	0.004132	0.25125	2.25791	0.0936206	0.127254	0.896471	0.0169501	0.0180626	0.0223598	0.013967	0.0155521	0.0196129	0.0147595	0.0165618	0.0189559
	Eif3e	5.75778	0.122627	0.02491	0.689151	1.35102	0.0581823	0.278768	0.825713	0.969561	0.0412986	0.394218	0.920912	6.7774	0.288684	0.00485298	0.816667	-0.0100064	-0.0130897	-0.0157391	0.00108668	-0.0143539	-0.0132044	-0.00663359	-0.00478861	-0.0150465
	Ppp1r21	6.10115	0.188881	0.0213563	0.689326	0.236071	0.0112975	0.791615	0.979764	1.16382	0.0720598	0.330013	0.907337	0.20029	0.0124013	0.819906	0.992836	-0.0680671	-0.0500371	-0.113006	-0.0478641	-0.0526691	-0.0874026	-0.0502666	-0.0495026	-0.0828375
	Ppp1r12b	5.97614	0.184694	0.0225802	0.689418	0.65949	0.043486	0.526621	0.930858	0.36424	0.0225139	0.69866	0.969209	0.666688	0.0412083	0.52305	0.964921	0.0448819	0.0224276	0.0377106	0.0603291	0.0487591	0.0332713	0.0545441	0.045635	0.0432349
	Ttc14	5.89063	0.152068	0.0234623	0.689848	1.77722	0.0957202	0.191555	0.781315	0.265892	0.0137281	0.768846	0.975563	2.87999	0.148695	0.0765245	0.90802	-0.0156998	-0.00718554	-0.0294722	-0.0306028	0.00471726	-0.0194657	-0.0129428	-0.0193899	-0.0123775
	3110082I17Rik	6.20668	0.181983	0.0203803	0.69	0.155545	0.0105659	0.856842	0.985149	1.29459	0.0759162	0.293239	0.888845	0.99942	0.058607	0.383523	0.946869	0.103137	0.22814	0.0288403	0.118332	0.0597912	0.119421	0.0890616	0.164249	0.0443157
	Adcy9	6.10523	0.191485	0.0213175	0.69096	0.0110814	0.00101911	0.988985	0.999948	1.19984	0.0752637	0.319407	0.901636	0.178294	0.0111841	0.837841	0.995476	0.15092	0.282932	0.0281045	0.209881	0.0974399	0.148587	0.15366	0.243444	0.0627722
	B230216N24Rik	6.13455	0.190745	0.0210418	0.691429	1.03204	0.0640962	0.3722	0.877115	0.374862	0.0233116	0.691507	0.967043	0.106303	0.00661066	0.899592	0.997161	-0.164577	-0.254286	-0.273709	-0.00490189	-0.140221	-0.262392	-0.0725616	-0.121851	-0.206965
	Trub1	5.76084	0.16259	0.0248755	0.691469	1.22414	0.0676274	0.312464	0.848443	0.824435	0.0465367	0.451029	0.921587	1.28681	0.0726364	0.295297	0.932921	0.0664937	0.0667932	0.0618231	0.0963867	0.0365954	0.0694896	0.066491	0.082802	0.0492092
	Srsf1	6.08563	0.19683	0.0215041	0.69162	0.00643746	0.000518039	0.993585	0.999567	0.519288	0.0335911	0.601755	0.950923	0.390539	0.0252627	0.681095	0.975047	0.0548078	0.0753402	0.0365278	0.0818977	0.0304691	0.0534811	0.0561834	0.0772368	0.0334985
	Lrp4	5.49752	0.098423	0.0280439	0.692797	6.34685	0.23261	0.0063836	0.23629	1.61753	0.0579178	0.220154	0.838289	5.71487	0.204629	0.00966343	0.788235	-0.0886594	-0.224735	0.0111051	0.0455959	-0.231794	-0.09321	-0.0930991	-0.0696761	-0.110345
	Prcp	5.48694	0.161302	0.0281803	0.692827	1.46883	0.0840419	0.250996	0.817815	0.681327	0.0400585	0.515866	0.933846	0.614665	0.0361391	0.54947	0.969363	0.0310692	0.0384487	0.0629413	0.00385813	0.0190071	0.0513539	0.0114326	0.0196392	0.0409742
	Ythdf1	5.85107	0.195775	0.0238833	0.693035	0.0964543	0.00654391	0.908417	0.992931	0.318849	0.0213371	0.730148	0.96974	0.102549	0.0068625	0.902944	0.999133	-0.0478904	-0.0724918	-0.0400803	-0.0404315	-0.0433028	-0.05391	-0.0418672	-0.0555122	-0.0416915
	Zc3h4	6.14346	0.161135	0.0209588	0.693103	1.2809	0.0725226	0.296871	0.840592	1.03273	0.0541742	0.371964	0.905045	2.17771	0.114237	0.136104	0.908	-0.0340494	-0.0932903	-0.0122673	-0.0240088	-0.0198282	-0.0482637	-0.0219185	-0.0531377	-0.0160477
	Gmip	5.89074	0.147526	0.0234612	0.693367	1.4863	0.0792864	0.247141	0.815166	2.15287	0.107832	0.138979	0.772993	1.88055	0.0941918	0.175217	0.914482	-0.0901231	-0.117497	-0.0382184	-0.0798613	-0.10122	-0.0852566	-0.0905407	-0.106943	-0.0697192
	Dgkq	5.82343	0.129726	0.0241826	0.693627	1.11322	0.05325	0.345563	0.868736	4.89361	0.218026	0.0169538	0.457838	2.02654	0.0902887	0.15466	0.938662	0.0756512	0.180371	-0.0160338	0.0388172	0.095378	0.0816234	0.0670976	0.107908	0.0396721
	Sub1	5.81244	0.176094	0.0243027	0.693659	0.585401	0.0296112	0.564967	0.940615	0.805146	0.0487856	0.459227	0.919732	0.706985	0.0428379	0.503533	0.961615	0.00235422	0.00359969	0	0.00318275	0.0029458	0.00154272	0.00306427	0.00336144	0.0014729
	Xrcc5	5.90888	0.164891	0.0241099	0.694089	1.89719	0.118863	0.174821	0.768051	1.19618	0.0667606	0.322124	0.902565	1.3697	0.0764445	0.275976	0.935239	0.164569	0.261028	0.382291	0.144089	-0.076032	0.30362	0.0399718	0.176464	0.172635
	Lbp	5.76254	0.129673	0.0248564	0.694286	1.8515	0.0780836	0.179651	0.774883	3.4293	0.154337	0.0497246	0.581473	2.5575	0.115101	0.0993301	0.898295	-0.0334079	-0.0322491	0.0125367	-0.0408498	-0.0756838	-0.00735397	-0.0582668	-0.0379242	-0.0315736
	Lipa	5.83891	0.0362264	0.0240145	0.694554	55.3719	0.695652	1.61333e-09	0	5.11021	0.0634106	0.0145784	0.427381	5.68762	0.0705755	0.00984109	0.790385	-0.00933679	0.00955549	-0.00240288	-0.028937	-0.0179631	0.00312926	-0.02345	-0.00922315	-0.010183
	Srek1ip1	5.85377	0.178122	0.0238543	0.6955	0.374134	0.0235132	0.691995	0.972697	0.173768	0.010575	0.841585	0.98026	1.45716	0.0886783	0.253608	0.929209	0.0599434	0.0754809	0.00797218	0.0594333	0.101683	0.0377521	0.080558	0.064511	0.0548274
	Fam103a1	5.89466	0.164578	0.0234199	0.695897	0.286757	0.0151426	0.753339	0.975187	1.42772	0.0797234	0.260329	0.86117	1.74659	0.0975292	0.196711	0.921723	-0.0514693	0.0247456	-0.116207	-0.0578345	-0.0485515	-0.0507282	-0.053193	-0.0195741	-0.0823795
	Bet1	5.4862	0.145787	0.0286229	0.696234	0.434886	0.0207368	0.652784	0.964003	0.321987	0.0171125	0.728065	0.970487	4.3159	0.229375	0.0262272	0.968852	-0.0865308	0.0676419	-0.170584	-0.199774	-0.0048639	-0.068487	-0.102319	-0.0851674	-0.0877238
	Mina	5.867	0.1752	0.0237128	0.696465	0.354802	0.0220791	0.705083	0.973005	0.284879	0.0170141	0.75472	0.972214	1.67052	0.0997699	0.210181	0.926597	-0.057591	-0.10309	-0.00718328	-0.0268479	-0.103685	-0.050656	-0.0652664	-0.0610931	-0.0554341
	Stat6	6.146	0.194258	0.0209352	0.696532	0.666983	0.0420617	0.522904	0.928754	0.517742	0.0327288	0.602646	0.950446	0.0614186	0.00388255	0.940583	1.00241	-0.0388843	-0.0167226	-0.036387	-0.0301009	-0.0715415	-0.0270398	-0.0508212	-0.0230079	-0.0539642
	Jmjd4	5.84881	0.250588	0.0287686	0.696667	1.2458	0.10675	0.315838	0.848673	NA	NA	NA	NA	NA	NA	NA	NA	0.237375	0.633005	0.0234462	NA	0.126122	0.371526	0.109378	0.367863	0.0838824
	4930474H06Rik	5.93658	0.218781	0.0248401	0.697129	0.635362	0.0532485	0.540631	0.932803	0.160184	0.0118065	0.853125	0.982009	0.303567	0.0223747	0.741695	0.987799	-0.130788	-0.137965	-0.0382938	-0.151059	-0.205099	-0.0881294	-0.184493	-0.140851	-0.12382
	Sp140	5.45452	0.157296	0.0286029	0.697479	2.20152	0.12969	0.133409	0.732997	0.339859	0.0196015	0.715385	0.968939	0.569763	0.0328614	0.573442	0.971233	-0.0413598	-0.0509335	-0.0579298	-0.0598344	-0.000596362	-0.055712	-0.0302154	-0.0539306	-0.0292631
	Zkscan14	6.69194	0.35208	0.0237944	0.697487	0.157468	0.0165696	0.856041	0.98436	NA	NA	NA	NA	NA	NA	NA	NA	-0.286069	NA	NA	NA	-0.193044	-0.338002	-0.246673	-0.436994	-0.169164
	Lrp1	5.79405	0.183281	0.0245051	0.697573	0.499741	0.0311838	0.613125	0.953583	0.365284	0.0231097	0.697954	0.968512	0.544442	0.0344442	0.58746	0.973095	-0.00874722	-0.00711782	-0.00457636	-0.0130321	-0.0101748	-0.00584012	-0.0116034	-0.0104065	-0.00737557
	Glipr2	6.17123	0.123261	0.0207025	0.697661	4.12373	0.17384	0.0294782	0.476144	6.0737	0.242626	0.00762249	0.31453	0.250176	0.00999376	0.780755	0.99678	0.0370992	0.0459073	-0.00176906	0.102538	0.0128273	0.0176669	0.0576829	0.0735579	0.00552912
	Mycl1	8.10911	0.536703	0.0247717	0.698077	NA	NA	NA	NA	NA	NA	NA	NA	NA	NA	NA	NA	0.153353	NA	0.165863	NA	NA	0.129496	NA	NA	0.18972
	Strada	8.80867	0.380297	0.0208686	0.698256	3.67698	0.317492	0.0809921	0.651914	NA	NA	NA	NA	NA	NA	NA	NA	-0.422625	NA	-0.693101	NA	NA	-0.747155	-0.163987	-0.579487	-0.39646
	B430306N03Rik	8.3427	0.126253	0.0233705	0.698454	NA	NA	NA	NA	25.3683	0.767814	0.00062053	0.0818182	NA	NA	NA	NA	-0.14731	NA	0.0749318	NA	NA	0.0237637	NA	-0.523569	0.0749318
	Ttc17	5.77655	0.133367	0.0246995	0.7	4.70602	0.198997	0.019353	0.388306	1.64304	0.0758683	0.215289	0.834366	0.919207	0.0424448	0.412996	0.937086	-0.112921	-0.140306	-0.266288	-0.00633157	-0.0554214	-0.208669	-0.0308765	-0.0560936	-0.160855
	Mtif2	5.91677	0.176737	0.0231886	0.7	0.00628724	0.000261966	0.993734	0.999446	1.05607	0.0630906	0.364089	0.90376	1.21821	0.0727768	0.314143	0.927267	-0.0628702	-0.139583	0.00739014	-0.055933	-0.0709767	-0.0620494	-0.0634549	-0.0947423	-0.0317933
	Tmx1	5.90688	0.152816	0.0232918	0.701036	1.90904	0.0987064	0.170982	0.772765	1.36289	0.0705183	0.275823	0.879521	1.60142	0.08286	0.223288	0.938071	-0.0426754	-0.0849992	-0.0631761	0.0361587	-0.0638426	-0.0723248	-0.0138419	-0.0217458	-0.0635093
	Brd4	5.92123	0.146879	0.0231423	0.701571	0.92104	0.0460482	0.412295	0.88021	0.16444	0.00815802	0.849357	0.981581	4.61073	0.228743	0.020711	0.911111	0.0667153	0.00218433	0.188397	0.105605	-0.0400787	0.102157	0.0327631	0.0596774	0.074159
	Zfp458	6.10518	0.172458	0.0231148	0.704737	0.480456	0.0284146	0.625814	0.953463	2.6213	0.148092	0.0987772	0.737865	2.04611	0.115597	0.156759	0.931394	-0.130263	-0.122964	-0.0473716	-0.203845	-0.177656	-0.0725691	-0.176466	-0.176885	-0.0996127
	Gm20427	5.40783	0.131955	0.0292241	0.709129	4.94124	0.245869	0.0163975	0.368807	0.668286	0.0326133	0.52226	0.93203	0.677761	0.0330757	0.517606	0.963608	0.0194006	0.00086085	-0.0136597	0.0325367	0.0548641	-0.00605555	0.0437004	0.0175064	0.0206022
	Gm16253	5.50104	0.177338	0.0294305	0.713636	0.163526	0.00991218	0.850268	0.984139	0.0761357	0.00490879	0.926958	0.994396	2.5199	0.162468	0.10568	0.903214	0.189414	0.0229974	0.369612	0.327994	0.00951806	0.225019	0.168756	0.201691	0.178489
	Zc3hav1	5.27983	0.115019	0.0310056	0.714625	5.0363	0.224479	0.0153456	0.344601	3.0143	0.131331	0.0687656	0.656979	0.761441	0.0331754	0.478407	0.958181	-0.0355593	0.00436187	0.0116338	-0.042051	-0.109296	0.00550471	-0.0756734	-0.0189806	-0.048831
	Rhob	5.37881	0.150491	0.0296177	0.714815	2.3712	0.133658	0.115801	0.709132	0.0949666	0.00531403	0.909758	0.989884	1.21535	0.0680069	0.314957	0.927074	-0.0276745	-0.0126032	-0.030492	-0.054252	-0.0160596	-0.0213901	-0.0351558	-0.0322946	-0.0232758
	Sde2	5.27244	0.163335	0.0311121	0.715748	1.41656	0.0940889	0.262929	0.819254	0.52523	0.0325422	0.598344	0.950261	0.0619533	0.00383851	0.940083	1.00247	0.0408832	0.0076079	0.0501916	0.0383324	0.058205	0.0309875	0.0482687	0.026037	0.0541983
	Ptcd2	5.82852	0.25091	0.0300383	0.71626	0.865819	0.0745448	0.442057	0.901774	0.0856202	0.00737168	0.91842	0.992177	0.749053	0.0644915	0.490847	0.961348	0.0635625	0.0454917	0.113675	0.0581512	0.0330622	0.0854042	0.0417208	0.0518215	0.0733684
	Cep85l	5.38556	0.194451	0.0309879	0.716667	1.15534	0.0834297	0.335097	0.863051	NA	NA	NA	NA	NA	NA	NA	NA	-0.182241	NA	-0.063395	-0.169037	-0.10218	-0.275507	-0.135608	-0.274128	-0.0864101
	Tfdp2	5.24647	0.106615	0.0314897	0.716732	4.73523	0.189918	0.0189563	0.392116	2.98449	0.121298	0.0704105	0.660976	2.76175	0.112245	0.0841467	0.912615	-0.0167218	-0.0236454	-0.0466783	0.0119518	-0.0153808	-0.0338858	-0.0017145	-0.00213785	-0.0310296
	4833420G17Rik	5.31185	0.13365	0.0305489	0.717269	1.84718	0.106759	0.180321	0.777326	2.33626	0.117564	0.119209	0.759701	1.53284	0.0771348	0.237179	0.93323	0.0407328	0.0150749	0.0296355	-0.000616452	0.105435	0.0260586	0.0524094	0.0105071	0.0675354
	Fam213a	5.35495	0.150661	0.0299458	0.717551	0.072431	0.00520562	0.930341	0.989687	1.3559	0.0762961	0.277554	0.881429	2.16573	0.121865	0.137482	0.913855	0.0177124	0.0349929	-0.00288809	0.0104542	0.0299741	0.0149456	0.0202141	0.0213584	0.013543
	Xrcc6	5.32413	0.165871	0.0303756	0.717814	0.498258	0.0312414	0.613997	0.953159	1.36184	0.084855	0.276084	0.880371	0.0268043	0.00167016	0.973582	1.00215	-0.0910998	-0.0268823	-0.1407	-0.0548985	-0.133563	-0.0850409	-0.0942306	-0.0449585	-0.137132
	Ift81	5.35593	0.19384	0.0308636	0.717928	0.637353	0.0461338	0.538613	0.932183	NA	NA	NA	NA	NA	NA	NA	NA	-0.124252	NA	-0.232726	-0.0844429	-0.087889	-0.159999	-0.0923352	-0.104336	-0.147086
	E230015J15Rik	5.25965	0.104666	0.0312975	0.718824	8.35657	0.339296	0.00187122	0.110256	0.761867	0.0303221	0.478216	0.930173	1.87751	0.0747245	0.175675	0.915401	-0.053049	-0.0842457	-0.0468746	0.033633	-0.107166	-0.0640294	-0.0367665	-0.0271101	-0.0770203
	Apcdd1	5.23513	0.122871	0.0316562	0.718992	4.84417	0.231367	0.017553	0.381057	0.649352	0.0304812	0.531697	0.936706	1.69226	0.0794364	0.206231	0.929021	-0.0220445	-0.00897048	-0.0215401	-0.0336222	-0.0251327	-0.0162091	-0.0293775	-0.0213643	-0.0233364
	Bcl2a1b	5.58557	0.262624	0.0331076	0.719259	NA	NA	NA	NA	0.841362	0.0791189	0.451799	0.920648	NA	NA	NA	NA	-0.169931	-0.102296	-0.05616	NA	NA	-0.0844425	NA	-0.233392	-0.05616
	Rcsd1	5.31319	0.157176	0.0305298	0.719355	1.6785	0.0986127	0.208721	0.793827	0.374852	0.0221779	0.691514	0.966821	0.69209	0.0409471	0.510654	0.961784	-0.0778162	-0.0814684	0.0158446	-0.113335	-0.137749	-0.0293744	-0.125542	-0.0975022	-0.060952
	Ube2i	5.24989	0.152027	0.0314397	0.719531	1.14933	0.0715614	0.334385	0.863493	1.70982	0.0990269	0.2031	0.818049	0.28215	0.0163411	0.756734	0.990997	-0.0510782	-0.138607	-0.0376173	-0.0486937	0.01117	-0.085975	-0.0187619	-0.0909184	-0.0132237
	Hook3	5.21273	0.155887	0.0319878	0.719615	0.0584676	0.00370451	0.943349	0.992644	0.437435	0.026163	0.650951	0.95697	2.11732	0.126637	0.143209	0.930533	-0.0397417	-0.0695661	-0.0182171	-0.0401221	-0.0302153	-0.0443804	-0.0351687	-0.056497	-0.0242162
	1700023H06Rik	9.03062	0.643637	0.0299235	0.720082	NA	NA	NA	NA	NA	NA	NA	NA	NA	NA	NA	NA	0.156091	NA	NA	NA	0.119917	NA	0.13032	NA	0.166337
	Wdr20a	5.29303	0.140381	0.0308163	0.7204	0.257266	0.0168107	0.775358	0.975257	4.24893	0.225379	0.026893	0.509615	0.199655	0.0105904	0.820418	0.992839	-0.0451553	-0.0366842	-0.0219553	-0.0886271	-0.0240961	-0.0326239	-0.0563616	-0.0652206	-0.0230257
	Rassf8	5.21707	0.135443	0.0319233	0.721236	1.12026	0.0565141	0.343351	0.869363	1.75745	0.0912519	0.194866	0.824637	2.27305	0.118024	0.125655	0.893611	0.0184341	-0.01987	0.043975	0.0250816	0.0209494	0.014304	0.0230155	0.0037677	0.0324622
	Slc19a2	5.20537	0.123729	0.0330546	0.721561	1.3409	0.0669378	0.283106	0.828267	1.04441	0.0496501	0.369476	0.907424	5.54732	0.263715	0.0116349	0.856897	-0.124057	-0.346892	-0.123255	0.018006	-0.108271	-0.200515	-0.055735	-0.164443	-0.100945
	Vdr	8.60109	0.632382	0.0325284	0.721591	NA	NA	NA	NA	NA	NA	NA	NA	NA	NA	NA	NA	-0.151409	NA	NA	NA	NA	NA	NA	NA	-0.120201
	Urb2	5.1518	0.164413	0.03291	0.722015	1.09045	0.0690496	0.352818	0.869195	0.299278	0.0191022	0.744196	0.971797	0.201616	0.0128686	0.818838	0.993974	0.0610189	0.0486969	0.0355774	0.0885418	0.0693692	0.044269	0.0789555	0.0688311	0.0524733
	Gba	5.11704	0.113481	0.0334493	0.722794	2.40291	0.106887	0.112801	0.702445	3.39474	0.15057	0.0510676	0.582639	2.68971	0.1193	0.0891924	0.906452	0.104038	0.0233478	0.00233299	0.0125231	0.377363	0.00938475	0.194943	0.0178611	0.189848
	Syt7	5.84188	0.310323	0.0324951	0.722814	0.491648	0.0522331	0.623416	0.953644	NA	NA	NA	NA	NA	NA	NA	NA	0.231452	NA	0.145647	0.213374	0.275099	0.145647	0.252767	0.213374	0.230715
	Lima1	5.12228	0.150357	0.0333675	0.722878	1.35097	0.0755189	0.278781	0.82533	0.590995	0.0346957	0.561968	0.944021	1.03059	0.0605029	0.372695	0.94062	0.0221882	0.0323335	0.0152268	0.0304869	0.00842813	0.0240118	0.0194575	0.0334954	0.0118275
	Sec11c	5.18113	0.170751	0.0324625	0.724046	0.508348	0.0324199	0.60809	0.954138	0.53935	0.0355501	0.590324	0.949736	0.0332834	0.00219381	0.967311	1.00067	0.0662585	0.044513	0.057518	0.0697569	0.0908214	0.0530219	0.0802892	0.0557591	0.0741697
	Psap	5.15247	0.0439419	0.0328998	0.724345	35.8848	0.61879	8.47577e-08	0	5.98981	0.102166	0.0080537	0.315574	2.67729	0.0456656	0.0900955	0.901483	0.0059496	-0.00619997	0.00673828	0.0124601	0.0123294	0.000522486	0.0123947	0.00266692	0.00953382
	Rfwd2	5.15841	0.158155	0.0328086	0.724812	1.05215	0.0607471	0.365399	0.872886	0.372322	0.0228305	0.693211	0.967043	0.804389	0.0493246	0.459552	0.954402	-0.0322131	-0.00986217	-0.037077	-0.0533434	-0.0263159	-0.0227589	-0.0398297	-0.0336768	-0.0316965
	Cd44	5.19013	0.102069	0.0327836	0.726792	4.58794	0.192862	0.0216094	0.396255	4.62524	0.18192	0.0210488	0.467265	2.61633	0.102906	0.095644	0.902976	-0.0464475	0.0406706	-0.0355934	-0.00428133	-0.164806	-0.00290882	-0.0845438	0.0149838	-0.1002
	Cdk2	5.18215	0.166201	0.0324469	0.72682	0.333097	0.0231816	0.720101	0.975011	0.161933	0.010387	0.851459	0.981642	1.0039	0.0643937	0.381947	0.947073	0.0802884	0.0758643	0.136028	0.121927	-0.00879066	0.106685	0.0565682	0.0985188	0.0636186
	2700060E02Rik	5.09184	0.132879	0.0338466	0.727839	0.202663	0.0115631	0.817996	0.978717	4.65244	0.242825	0.0201042	0.469953	0.258661	0.0135003	0.774301	0.994304	-0.0159604	0.00775136	-0.039541	-0.00141693	-0.0283375	-0.0168171	-0.0148772	0.00250812	-0.0339392
	Dnajc12	5.77044	0.288152	0.0350973	0.755839	NA	NA	NA	NA	1.62762	0.162553	0.240326	0.848123	NA	NA	NA	NA	0.272789	0.0914021	0.253783	NA	NA	0.181088	NA	0.394268	0.237928
	Rin2	4.98081	0.162447	0.035661	0.756631	0.946252	0.0616929	0.402792	0.877922	0.0152576	0.000995244	0.984868	0.998783	0.378625	0.0246975	0.688992	0.979125	0.0255586	0.00715644	0.0140095	0.0413164	0.0393567	0.0100268	0.0403365	0.0244715	0.0266831
	P2ry6	4.96049	0.157972	0.0355696	0.757194	1.22034	0.0777256	0.312798	0.847014	NA	NA	NA	NA	NA	NA	NA	NA	0.136427	0.130551	-0.00819118	0.421527	NA	0.063166	0.238939	0.290455	-0.0526316
	Mmgt2	8.16117	0.620094	0.0355404	0.759206	NA	NA	NA	NA	NA	NA	NA	NA	NA	NA	NA	NA	0.286861	NA	NA	NA	NA	NA	NA	NA	0.299002
	Slc39a7	4.99095	0.124757	0.0354909	0.761232	4.76297	0.242877	0.0185878	0.38903	0.678122	0.0339017	0.51743	0.93329	0.566058	0.0282992	0.57547	0.971918	0.0188021	5.66899e-05	-0.0136597	0.0325367	0.0532743	-0.00645763	0.0429055	0.0171043	0.0198073
	Zfp277	5.0529	0.139747	0.0354538	0.762909	3.904	0.21381	0.0361756	0.512325	0.983639	0.0544086	0.390528	0.91974	0.164645	0.00910713	0.849279	0.996289	0.124148	-0.0342547	0.0820312	0.171102	0.270427	0.0321944	0.218315	0.0644814	0.176229
	Mnt	4.79754	0.136137	0.0388997	0.768227	1.79905	0.101915	0.18797	0.779699	1.91811	0.108858	0.169658	0.813653	0.00434431	0.000246552	0.995666	1.0024	0.0594925	0.12412	0.0493355	0.0717928	-0.00920247	0.0867015	0.0312952	0.0992725	0.0200665
	Cyb5b	4.92902	0.148852	0.0365445	0.77	1.45053	0.0854575	0.255105	0.819253	0.827142	0.0499581	0.449891	0.921109	0.314545	0.018998	0.733212	0.986434	-0.0249098	-0.0237781	-0.00889759	-0.0244489	-0.0422528	-0.0170606	-0.0333508	-0.0231821	-0.0255752
	Btnl9	4.79818	0.0987082	0.0388878	0.770134	0.468374	0.0129457	0.63186	0.957063	5.73368	0.235906	0.00954286	0.332374	4.20373	0.172958	0.0277966	0.948872	-0.0244034	-0.0196513	-0.0500742	0.021992	-0.0500969	-0.0355591	-0.0140525	0.00494882	-0.0500855
	Ifi35	4.80977	0.125355	0.0386736	0.770608	0.689073	0.036297	0.512109	0.925492	3.7089	0.193327	0.04017	0.57147	0.881679	0.0459578	0.427622	0.951329	-0.0818011	-0.00921867	-0.0922834	0.0178238	-0.24689	-0.0487301	-0.114533	0.00890367	-0.169587
	Mir331	4.80433	0.134913	0.038774	0.770707	2.1843	0.115038	0.135352	0.728557	0.799915	0.0449259	0.461478	0.921264	0.918844	0.0516053	0.413135	0.936496	0.063631	-0.026225	0.0365099	0.143402	0.0862976	0.00683455	0.11485	0.0687496	0.0614038
	Cant1	4.77312	0.130635	0.0393557	0.772093	3.24485	0.177564	0.0573669	0.57179	1.11475	0.061019	0.34508	0.906565	0.0227874	0.00124733	0.977492	1.00285	0.0521849	0.0258001	-0.0190874	0.127221	0.0722364	0.00383862	0.0997286	0.0779102	0.0265745
	Gdpd1	6.40206	0.477692	0.0392198	0.772333	NA	NA	NA	NA	NA	NA	NA	NA	NA	NA	NA	NA	0.21133	NA	0.112242	NA	NA	0.240578	NA	NA	0.119543
	Gtf3a	4.84287	0.153612	0.0380688	0.772852	0.206483	0.0106561	0.814931	0.978684	1.11177	0.0705286	0.346021	0.906742	0.523671	0.0332207	0.599237	0.976827	0.0289655	0.00838324	0.0599544	0.0074683	0.0363964	0.036782	0.0219324	0.00857025	0.0481754
	Zfp369	4.95672	0.192348	0.0376456	0.772917	0.273359	0.0180556	0.763617	0.975287	0.118024	0.00915992	0.889289	0.988669	0.0150528	0.00116826	0.985071	1.00281	-0.137845	-0.225	-0.147251	-0.119912	-0.0763235	-0.179943	-0.0917554	-0.172589	-0.111787
	Hmgcs1	4.81277	0.126706	0.0386183	0.77322	0.298798	0.016986	0.744545	0.979171	3.03557	0.159835	0.067617	0.652132	1.75113	0.0922041	0.195937	0.920939	-0.0148629	-0.00178871	-0.022761	-0.0165294	-0.0176783	-0.0127916	-0.0171038	-0.0102191	-0.0202197
	Slc15a4	4.83227	0.155317	0.0382614	0.773288	0.344476	0.0198411	0.712185	0.97456	1.29454	0.0832169	0.293254	0.888342	0.0010123	6.5074e-05	0.998988	1.00069	-0.0397331	-0.0163872	-0.0355842	-0.0436031	-0.0631572	-0.0247929	-0.0533802	-0.0313469	-0.0493707
	Csrnp2	4.8964	0.150981	0.0375946	0.773868	0.878145	0.0541553	0.42962	0.894507	0.273486	0.0168659	0.763271	0.97372	1.61548	0.0996269	0.221502	0.935452	0.0845864	0.115631	0.113337	0.113604	0.00330265	0.11015	0.0590232	0.114617	0.0583199
	Tgfb2	5.30599	0.28729	0.0384104	0.774061	0.0815783	0.008834	0.922129	0.990844	NA	NA	NA	NA	NA	NA	NA	NA	-0.212584	NA	-0.198974	NA	-0.0707475	-0.23886	-0.195309	NA	-0.121893
	Mrgprf	5.06247	0.206421	0.0371957	0.774648	0.0394459	0.00206777	0.961405	0.996845	0.116608	0.00950938	0.8906	0.987414	0.575173	0.0469052	0.572615	0.970697	-0.147645	-0.109972	-0.213766	-0.212244	-0.0939693	-0.164471	-0.130818	-0.150614	-0.146172
	Ret	4.84654	0.107324	0.0380026	0.774828	7.22928	0.323877	0.00366466	0.162	1.10895	0.0491141	0.346911	0.906725	0.317536	0.0140633	0.731081	0.98531	-0.0769707	-0.0507147	-0.104214	0.00193425	-0.134508	-0.0792439	-0.0662867	-0.0333286	-0.119361
	Abr	4.89628	0.145085	0.0371156	0.775265	0.595922	0.0416215	0.559341	0.938542	2.05623	0.121859	0.150809	0.788325	0.273517	0.0162096	0.763139	0.992387	-0.0554377	-0.157335	-0.0180723	-0.0638395	0.00286664	-0.0827372	-0.0304864	-0.106664	-0.00760283
	Tnfrsf22	4.96914	0.180276	0.0374313	0.775439	0.211124	0.0153188	0.811455	0.979815	0.756343	0.0548788	0.482341	0.932357	0.330007	0.0239447	0.72276	0.985173	-0.11358	-0.0698097	-0.147893	-0.087696	-0.180767	-0.105731	-0.124625	-0.079863	-0.160024
	Pbld1	5.32297	0.260355	0.0396801	0.775828	NA	NA	NA	NA	1.56103	0.152705	0.249703	0.850611	NA	NA	NA	NA	-0.127989	NA	NA	-0.119022	-0.0512093	NA	-0.0814038	-0.204769	-0.0512093
	Zfand2b	4.81288	0.164144	0.0386163	0.77585	0.0610621	0.00408867	0.940917	0.992121	0.0795915	0.00542895	0.923747	0.993017	0.613487	0.041846	0.550085	0.969172	0.0887798	0.0325005	0.11939	0.103305	0.0890112	0.0817147	0.0961582	0.0725151	0.104201
	Atp6v1g1	4.68355	0.116597	0.0410803	0.775884	3.60184	0.180256	0.0435694	0.536098	0.556294	0.027698	0.580853	0.950179	2.08436	0.103781	0.147256	0.9326	0.0285535	0.0967519	0.0315684	-0.0135563	0.00415919	0.0635126	-0.00469854	0.0394233	0.0178638
	Eef1g	4.90139	0.127908	0.0370259	0.776241	1.72862	0.0754092	0.199806	0.791071	3.05486	0.159441	0.0665934	0.648728	0.425704	0.0222185	0.658353	0.974478	0.0252826	0.0428793	-0.0226099	0.0644857	0.0198443	0.00640097	0.042165	0.0545135	-0.00138279
	Adig	4.87156	0.154474	0.0375535	0.776573	0.0974738	0.00463231	0.907499	0.993073	0.766677	0.0486218	0.476064	0.930701	0.968251	0.0614054	0.394695	0.947106	-0.0170449	-0.0150972	-0.0262038	-0.0030807	-0.0244323	-0.0205779	-0.0137565	-0.0078833	-0.0253181
	Fnip1	5.67839	0.386854	0.0410297	0.777097	NA	NA	NA	NA	NA	NA	NA	NA	NA	NA	NA	NA	-0.238343	NA	NA	NA	NA	NA	-0.276537	-0.209677	NA
	Arfgap3	4.84845	0.138301	0.0379681	0.777163	1.58132	0.0876648	0.227265	0.807967	0.668393	0.0381314	0.522207	0.932568	1.35473	0.0772865	0.277844	0.930966	-0.0701284	-0.107973	0.0715793	-0.109143	-0.140083	-0.0122931	-0.124613	-0.107899	-0.0342517
	Crybg3	4.7434	0.125483	0.0399187	0.777558	0.040393	0.00222669	0.96048	0.996736	2.76567	0.146327	0.0838815	0.693801	2.22288	0.117609	0.13104	0.899145	-0.02698	-0.0365599	-0.0202281	0.0121874	-0.0695556	-0.025369	-0.0286841	-0.0093851	-0.0448918
	Mettl13	4.90592	0.159347	0.0369464	0.77758	0.216687	0.0132609	0.806807	0.980389	0.250192	0.0162528	0.780743	0.978064	0.973996	0.0632718	0.39261	0.945783	0.0788933	0.0744707	0.08039	0.0686009	0.0849445	0.0795482	0.0767727	0.0766213	0.0826672
	Zfp940	4.80919	0.186807	0.0409559	0.777994	0.967495	0.0751623	0.397986	0.887437	NA	NA	NA	NA	NA	NA	NA	NA	0.182486	-0.0243563	0.546883	NA	0.240816	0.25923	0.141183	-0.0638501	0.34628
	Angpt1	4.86185	0.109185	0.0415174	0.778914	5.721	0.262851	0.0125937	0.315789	1.43708	0.0645463	0.26507	0.867857	4.17534	0.187535	0.033489	0.974375	0.149717	0.0802662	0.692135	0.0321288	-0.00793853	0.339579	0.0149571	0.0527591	0.27416
	Mrpl28	4.69107	0.142627	0.0409323	0.779545	0.50477	0.0350012	0.610177	0.953388	2.05987	0.125256	0.150344	0.790102	0.0350963	0.00213413	0.965564	1.0001	0.0299548	0.0027146	0.0591861	0.00431178	0.0463749	0.0339831	0.0253433	0.00456886	0.0527805
	Ttc9	5.95908	0.426896	0.0404936	0.780065	NA	NA	NA	NA	NA	NA	NA	NA	NA	NA	NA	NA	0.260057	NA	NA	NA	0.291514	NA	0.218636	NA	0.325071
	RP24-547D11.3	4.72074	0.143747	0.0413935	0.780128	1.79099	0.117955	0.191349	0.782309	0.350484	0.0213446	0.708389	0.970028	1.41842	0.0863823	0.264357	0.93036	0.106539	-0.058871	0.109154	0.245186	0.0965559	0.0326834	0.181487	0.107125	0.103755
	AC130214.1	4.72439	0.133557	0.0407787	0.78013	2.84598	0.157466	0.0795716	0.64644	1.32174	0.0747304	0.28703	0.880955	0.156846	0.00886801	0.855783	0.997425	-0.0940228	-0.207355	-0.139171	0.000133384	-0.0247864	-0.179886	-0.0123265	-0.0969732	-0.0819788
	Pip4k2c	4.71642	0.158506	0.0404377	0.781311	0.00942549	0.000581789	0.990623	0.999774	0.973999	0.0654668	0.392608	0.919681	0.0361178	0.00242764	0.964581	1.00026	0.0342174	0.0142333	0.0550329	0.0212992	0.0459499	0.0349944	0.0336245	0.0177995	0.0504914
	Rnf135	4.64896	0.156395	0.041769	0.783121	0.73321	0.0510474	0.491259	0.920408	0.259691	0.0174724	0.773521	0.976824	0.0454988	0.00306124	0.955607	1.00141	0.113927	0.164915	0.124869	0.140769	0.0375748	0.144438	0.089172	0.148002	0.0812217
	Gm25835	4.63995	0.129564	0.0419504	0.783175	0.547964	0.0327923	0.585488	0.949156	0.607735	0.0339403	0.553097	0.941494	2.93031	0.16365	0.0735113	0.913158	0.0401145	0.0645955	0.0230293	-0.0185012	0.0956128	0.0404392	0.0385558	0.0195876	0.059321
	Kdr	4.71805	0.159115	0.0404061	0.783224	0.656186	0.045653	0.52827	0.931543	0.286581	0.0193297	0.753468	0.971912	0.0241578	0.00162943	0.976156	1.00242	0.042207	0.0653258	0.0467889	0.0480576	0.0131762	0.0558917	0.0306169	0.0548321	0.0299825
	Crnkl1	4.62392	0.114316	0.0422754	0.783596	3.31114	0.162566	0.0544827	0.572912	1.07147	0.0529791	0.358994	0.908176	2.02976	0.100362	0.154237	0.938137	0.0296987	0.104322	0.0255974	-0.0180562	0.0125142	0.0636019	-0.00277101	0.0398865	0.0190558
	Ssh1	4.57353	0.133218	0.0433162	0.78483	0.178819	0.0091534	0.837409	0.982909	0.394799	0.0229994	0.678295	0.964511	2.80525	0.163422	0.081251	0.911933	0.0342226	0.0106181	0.0663898	0.0608916	-0.00201053	0.0399002	0.0294405	0.0353978	0.0321896
	Zfp251	4.79268	0.200015	0.0428225	0.785	1.08444	0.0905149	0.360366	0.872735	NA	NA	NA	NA	NA	NA	NA	NA	-0.231437	NA	NA	-0.250644	-0.285728	-0.0434641	-0.279142	-0.121702	-0.314504
	Nr2f2	4.59563	0.122225	0.0445283	0.785843	4.31116	0.197687	0.0277493	0.464626	2.01671	0.107272	0.159273	0.799224	0.174253	0.00926879	0.841346	0.995159	-0.112021	-0.273576	-0.0362573	-0.16917	-0.0289966	-0.129271	-0.0990833	-0.224279	-0.0236593
	Arntl	5.41707	0.351368	0.0422326	0.786076	NA	NA	NA	NA	NA	NA	NA	NA	NA	NA	NA	NA	-0.362906	-0.248474	NA	NA	NA	-0.259343	NA	-0.24056	NA
	Med9	4.61047	0.133151	0.0425505	0.786164	2.45431	0.148379	0.108114	0.696502	0.781328	0.0451297	0.469574	0.927591	0.272084	0.0157156	0.764208	0.991689	0.0442444	0.0174603	0.0128736	0.0658914	0.0666668	0.0179585	0.0662791	0.0474155	0.0397702
	Cdk11b	4.50956	0.112166	0.0446791	0.786186	1.48796	0.0795243	0.246777	0.814769	1.83806	0.0914364	0.181743	0.815411	3.02131	0.150298	0.0683845	0.910198	0.100439	0.391647	-0.00318924	0.0090755	0.0373322	0.184158	0.0232038	0.188363	0.0170715
	Itga6	4.59885	0.0701927	0.0427898	0.786834	8.41339	0.271262	0.00181073	0.106579	9.47747	0.289311	0.000995095	0.126316	1.06843	0.0326151	0.359993	0.936026	-0.00746787	-0.0119697	-7.97869e-05	-0.00882765	-0.00644522	-0.00630147	-0.00763644	-0.0109881	-0.00326251
	Zfp551	5.53957	0.365052	0.0430483	0.786916	NA	NA	NA	NA	0.317592	0.041858	0.735734	0.969581	NA	NA	NA	NA	0.236649	NA	NA	0.260809	0.182037	NA	0.216871	0.264904	0.2175
	Ctu2	4.57444	0.122887	0.043297	0.787267	3.37089	0.180389	0.0520175	0.559244	0.700524	0.0376376	0.506609	0.934667	0.753691	0.0404942	0.481898	0.95917	0.025446	0.0515234	0.0541427	-0.0214617	0.0213444	0.0515987	-5.86888e-05	0.0127396	0.0377435
	Lyrm9	4.55389	0.148875	0.0437296	0.787692	1.13725	0.0702535	0.338081	0.868072	0.311074	0.0203391	0.735694	0.969817	0.0690996	0.00451798	0.933427	1.00313	0.073254	0.0441923	-0.00121729	0.143744	0.102783	0.0196162	0.123264	0.0985502	0.050783
	Fubp1	4.49839	0.145579	0.044922	0.787725	0.676588	0.0418755	0.51818	0.929619	0.325996	0.0211	0.725089	0.971305	0.698223	0.0451924	0.507709	0.963141	0.0219152	0.00970178	0.0324328	0.034717	0.00991728	0.0223149	0.0223171	0.022107	0.021175
	9430008C03Rik	4.51677	0.136404	0.0445232	0.788218	1.30359	0.0753544	0.290878	0.839406	1.15083	0.0695091	0.33393	0.906123	0.343769	0.0207633	0.712674	0.984569	0.0538372	0.0922721	0.0389968	0.0934513	-0.00740235	0.0626791	0.0430245	0.094403	0.0157972
	Mir378b	11.313	0.7904	0.0436208	0.788272	NA	NA	NA	NA	NA	NA	NA	NA	NA	NA	NA	NA	-0.126603	NA	NA	NA	NA	NA	-0.126603	NA	NA
	Lyz2	4.37897	0.137378	0.0476142	0.788319	0.582496	0.0407886	0.566531	0.940736	0.95874	0.0601556	0.398174	0.921526	0.706955	0.0443575	0.503548	0.961309	-0.00881504	-0.00358751	-0.00464817	-0.00376265	-0.0226342	-0.00415457	-0.0131984	-0.00347694	-0.0136412
	Nmrk1	5.3323	0.371846	0.0462988	0.788921	0.0038867	0.000542075	0.996123	0.99905	NA	NA	NA	NA	NA	NA	NA	NA	-0.373781	NA	-0.306624	NA	-0.384977	-0.365385	-0.384977	NA	-0.3458
	Acot2	4.38039	0.11923	0.0475812	0.789714	0.739469	0.0391115	0.488377	0.919389	1.40828	0.0766638	0.264874	0.868723	2.5316	0.137815	0.101459	0.896846	-0.0394638	0.0534596	-0.0985635	-0.0603755	-0.0420321	-0.0282573	-0.0512038	-0.00651412	-0.0702978
	Ring1	4.51742	0.115784	0.044509	0.79	2.49436	0.12085	0.104608	0.682555	2.99715	0.153637	0.0697068	0.657547	0.257724	0.0132112	0.775011	0.994308	0.0699904	0.152491	0.130923	0.0464794	-0.044985	0.145174	0.000747221	0.0935201	0.0429688
	Ccdc80	4.38762	0.115724	0.0474132	0.790258	3.61424	0.194324	0.0431603	0.533415	1.48132	0.07814	0.248233	0.849709	0.167853	0.0088543	0.846504	0.997105	-0.0155094	-0.016023	-0.0175177	-0.00699846	-0.0256575	-0.0160075	-0.016328	-0.00975327	-0.0215876
	Ttll12	4.45222	0.15062	0.045942	0.790294	0.488482	0.0320556	0.619779	0.954147	0.307354	0.0207957	0.738364	0.970333	0.257718	0.0174374	0.775015	0.994066	-0.10806	-0.160576	-0.160185	0.0133238	-0.132184	-0.159638	-0.0594301	-0.0681098	-0.146184
	Bbc3	4.58285	0.188403	0.046233	0.790643	0.870938	0.0716093	0.435469	0.896299	NA	NA	NA	NA	NA	NA	NA	NA	-0.19063	-0.3601	-0.158506	-0.201602	NA	-0.27472	-0.107596	-0.276035	-0.0705278
	Igha	4.39266	0.14839	0.0478179	0.791477	0.266824	0.0183086	0.76825	0.975993	0.112787	0.0076202	0.893854	0.987562	1.22514	0.0827738	0.312987	0.928862	0.0985924	0.03029	0.136338	0.195887	0.0411981	0.0757923	0.118542	0.114811	0.0844954
	Siglech	4.43725	0.16338	0.0473646	0.791667	0.860955	0.0634007	0.437151	0.898068	NA	NA	NA	NA	NA	NA	NA	NA	-0.113679	NA	-0.0299442	-0.165178	-0.112693	-0.059284	-0.138935	-0.203135	-0.0713184
	Arsk	4.44125	0.130235	0.0461881	0.792082	2.16898	0.134371	0.137107	0.730303	0.809538	0.0474778	0.457346	0.924133	0.351724	0.0206279	0.707193	0.984043	0.0471426	0.117147	0.0810765	0.0271219	-0.0227981	0.0950308	0.00216192	0.0676634	0.0291392
	Gm15270	4.51987	0.135494	0.0444561	0.792097	1.84669	0.102008	0.180397	0.775741	0.825179	0.0494735	0.450716	0.922321	0.247397	0.0148327	0.782881	0.99422	0.0803644	0.0374812	-0.0191087	0.169113	0.128528	0.00605679	0.14882	0.11093	0.0547098
	Mre11a	4.43674	0.124862	0.0468079	0.792174	2.52686	0.136602	0.102838	0.682228	2.01393	0.113355	0.157336	0.795005	0.00736973	0.00041481	0.99266	1.00287	0.0740975	0.0354501	0.166465	-0.0373605	0.110861	0.106529	0.0323278	0.00149865	0.145682
	Mis12	4.40501	0.146696	0.0470119	0.792197	0.288429	0.0219389	0.752111	0.976855	0.592014	0.0394305	0.561424	0.944472	0.431161	0.028717	0.654899	0.973083	-0.0409803	-0.0375553	-0.0403162	-0.00374377	-0.0787841	-0.0396534	-0.0412639	-0.020634	-0.0595501
	Zfp583	4.31835	0.116775	0.0490501	0.792244	0.24929	0.0137726	0.781433	0.976184	0.989783	0.0535305	0.38694	0.919587	3.59182	0.194257	0.0439033	0.914414	0.0519323	0.0686843	0.0560787	0.0970156	-0.00404323	0.0589087	0.0464862	0.0780722	0.0260177
	Cbr1	4.45226	0.137749	0.045941	0.792625	1.09088	0.0690337	0.35268	0.869353	0.627168	0.0388082	0.542991	0.938409	0.716544	0.0443386	0.499021	0.961083	0.0272637	0.0183933	-0.000291579	0.0472682	0.0434142	0.00820607	0.0453412	0.0324687	0.0215613
	Pop5	4.39324	0.137504	0.047283	0.793084	0.612106	0.0377777	0.550807	0.93506	0.29542	0.0184927	0.747001	0.970886	1.37082	0.0858105	0.273876	0.935925	0.110583	0.00500959	0.228552	0.138125	0.0601225	0.12678	0.0991236	0.0760059	0.144337
	Mycbp	4.30172	0.137645	0.0499812	0.79346	0.635354	0.0492686	0.539192	0.931693	1.33141	0.0852036	0.284565	0.88166	0.508547	0.0325446	0.608267	0.976483	0.0891983	0.160297	0.0694855	0.082088	0.0840036	0.104031	0.0806539	0.111911	0.075031
	Derl2	4.41688	0.126053	0.0467403	0.793605	2.05604	0.115937	0.150833	0.745931	0.227819	0.0130034	0.798044	0.975397	1.5276	0.0871922	0.238279	0.936997	0.02365	0.0359982	0.0362044	0.0252729	-0.000636913	0.0344114	0.012318	0.0302809	0.0177837
	CT030159.1	4.73765	0.189038	0.0458957	0.794083	0.94409	0.0648702	0.410973	0.879259	0.439499	0.0350731	0.652396	0.956912	1.27855	0.102031	0.307107	0.930682	-0.184423	-0.0632499	-0.448433	-0.129188	0.0243035	-0.293776	-0.062335	-0.0974317	-0.244338
	Riok1	4.52801	0.124324	0.0442811	0.79419	0.624607	0.0282572	0.544311	0.933889	3.82162	0.209858	0.0368996	0.573981	0.000252045	1.38406e-05	0.999748	1.00025	-0.0377919	-0.0328794	-0.0738072	0.00255302	-0.0399681	-0.0580427	-0.0187076	-0.0142223	-0.0568877
	Znhit3	4.52121	0.144308	0.0444272	0.794207	0.485307	0.023957	0.62167	0.953785	1.32596	0.0846438	0.285096	0.880324	0.0933036	0.00595611	0.91126	0.998345	0.028938	0.0261905	0.0490196	0	0.0398551	0.0392357	0.0199275	0.0112245	0.0444373
	Osbpl11	4.32052	0.10241	0.048998	0.794444	1.90244	0.0874574	0.171953	0.769512	0.889746	0.0421795	0.424431	0.913421	4.64184	0.220052	0.0202565	0.902062	-0.0400071	-0.0407238	0.0344478	-0.0198175	-0.132338	-0.00115002	-0.0760777	-0.032167	-0.0489451
	Idh1	4.28041	0.134089	0.0499738	0.794809	2.15115	0.134951	0.139181	0.73417	0.116284	0.00728548	0.890743	0.987396	0.0534065	0.00334605	0.948112	1.00184	0.0227117	0.000276005	-0.000321117	0.0493081	0.0385354	0.000462028	0.0439218	0.0263115	0.0191072
	Arhgap30	4.47278	0.135097	0.0454846	0.795224	0.182629	0.0105766	0.834273	0.982532	0.107539	0.00649627	0.898491	0.988868	2.52734	0.152673	0.101814	0.897593	0.0294075	0.0168014	0.0487794	0.0465566	0.00699457	0.0316719	0.0267756	0.0314804	0.027887
	Nfkbib	4.55439	0.107397	0.0442277	0.796012	4.89202	0.226152	0.0174723	0.378319	0.985139	0.046461	0.389265	0.920279	2.04922	0.0966448	0.152718	0.932834	-0.0756926	-0.112432	-0.0845267	0.0309318	-0.182787	-0.0948118	-0.0713157	-0.0245907	-0.1248
	Rpap2	4.19522	0.0867714	0.0521202	0.796063	1.34885	0.0528768	0.279309	0.82408	7.29013	0.301569	0.00353047	0.2375	1.93741	0.0801443	0.166877	0.927201	-0.0440178	-0.123224	0.0813932	-0.0953073	-0.0371678	-0.0184154	-0.0662375	-0.111527	0.0221127
	Fgb	10.4467	0.776897	0.0481377	0.796317	NA	NA	NA	NA	NA	NA	NA	NA	NA	NA	NA	NA	-0.706667	NA	NA	NA	NA	NA	NA	NA	NA
	Ptov1	4.28199	0.117263	0.0499349	0.796438	0.286446	0.0111233	0.753567	0.974956	2.67098	0.14629	0.0905582	0.713426	1.65964	0.0908991	0.212187	0.928993	-0.0690838	-0.19236	0.0728294	-0.117101	-0.0596286	-0.047401	-0.0883647	-0.150269	0.00660036
	Trim14	4.45445	0.118151	0.045892	0.796439	0.940727	0.0465016	0.404854	0.877132	3.78282	0.200673	0.0379912	0.572036	0.399868	0.0212125	0.674979	0.975613	-0.0704882	-0.0358044	-0.0284882	-0.108058	-0.115505	-0.027494	-0.111781	-0.0752709	-0.0719968
	Actl6a	4.22109	0.135954	0.0514576	0.796543	0.0198087	0.00125986	0.980403	0.996432	1.53628	0.0989618	0.236461	0.845615	0.35729	0.0230155	0.703384	0.985189	-0.0435874	-0.0752146	-0.0167038	-0.0584326	-0.0219268	-0.0470694	-0.0401797	-0.0676383	-0.0193153
	Rfc3	4.32083	0.135256	0.0489905	0.796657	0.973119	0.066265	0.392927	0.883827	0.765121	0.0479016	0.476759	0.929601	0.574105	0.0359427	0.571075	0.970609	0.0937462	0.0583786	0.000816759	0.102974	0.203752	0.0291464	0.153363	0.0810399	0.102284
	Arpc1b	4.2968	0.137909	0.0495724	0.79697	0.18449	0.00980171	0.832747	0.982604	0.27804	0.0178478	0.759775	0.973182	1.46748	0.0941993	0.251297	0.934916	-0.000663843	-0.00120035	0	-0.000600296	-0.000988853	-0.000514437	-0.000794574	-0.000857463	-0.000494426
	Rpn2	4.33075	0.108263	0.0487524	0.797199	4.66591	0.223105	0.0199124	0.382879	0.371412	0.0185696	0.693822	0.966249	1.29843	0.0649176	0.29223	0.929203	-0.0123577	0.00451632	0.00206505	-0.0360293	-0.0180785	0.00403614	-0.0270539	-0.01732	-0.00800673
	Med10	4.30178	0.107064	0.0494511	0.797238	4.17383	0.188687	0.0284126	0.470134	1.77574	0.0883907	0.1918	0.824713	0.489228	0.0243522	0.619336	0.973804	-0.0480517	-0.0362679	-0.128863	-0.00863185	-0.0174441	-0.0893677	-0.013038	-0.018419	-0.0731537
	Angel2	4.04222	0.0972346	0.0562427	0.797821	0.57075	0.0266244	0.572903	0.943208	0.0919497	0.00442365	0.912485	0.990595	6.60211	0.317624	0.00542176	0.846154	-0.0244992	-0.086931	0.0033643	0.0295518	-0.0533707	-0.0379397	-0.0119095	-0.0235687	-0.0250032
	Chn1	5.41439	0.386553	0.0483966	0.798023	0.296226	0.0422973	0.751435	0.978151	NA	NA	NA	NA	NA	NA	NA	NA	0.388583	NA	0.246254	NA	0.142857	0.246254	0.485714	NA	0.224126
	Ing1	4.19613	0.123948	0.0520968	0.798158	2.3133	0.136268	0.121508	0.719824	0.0514772	0.00304114	0.949934	0.996227	0.964105	0.0569568	0.396207	0.948788	-0.0335582	-0.0549803	-0.022527	-0.00490175	-0.0492194	-0.0381156	-0.0270606	-0.0314322	-0.0358732
	Zbtb5	4.04574	0.1327	0.0561438	0.798301	0.666271	0.0426649	0.523256	0.928678	0.558964	0.036668	0.579376	0.949895	0.495823	0.032526	0.615431	0.974933	-0.0223022	-0.00867694	-0.0534201	-0.0108583	-0.0124857	-0.0332127	-0.011672	-0.0106076	-0.0329529
	Gng11	4.38127	0.0920843	0.0486563	0.798315	2.15998	0.0888491	0.140262	0.735831	1.03958	0.0436993	0.371101	0.906661	7.89923	0.332048	0.00276752	0.533333	-0.0764505	-0.147839	0.114744	-0.0814281	-0.250828	-0.00313343	-0.154028	-0.106018	-0.0419296
	Vars	4.28525	0.10973	0.0498548	0.798352	3.79429	0.200142	0.0376649	0.530556	0.974962	0.0499305	0.39226	0.920406	1.1145	0.0570768	0.345158	0.935805	0.0519361	-0.00763906	-0.0110436	0.12538	0.0888318	-0.00973312	0.107106	0.0638035	0.0388941
	Zc2hc1a	4.26161	0.151292	0.0509703	0.798387	0.394987	0.0296912	0.678371	0.970063	0.208916	0.0148335	0.813055	0.979337	0.34937	0.024806	0.708974	0.984492	-0.0472265	-0.0163717	-0.0471506	-0.0444406	-0.0732292	-0.0339597	-0.0588349	-0.0324111	-0.0601899
	Gin1	4.53597	0.23962	0.0514147	0.7984	0.196946	0.020808	0.823472	0.980451	NA	NA	NA	NA	NA	NA	NA	NA	0.230025	0.357527	NA	0.3536	NA	0.194318	0.278826	0.327393	0.188568
	Dennd5a	4.32159	0.113405	0.0489721	0.798603	2.43505	0.13075	0.109844	0.696793	0.145748	0.00764928	0.865167	0.984431	2.81226	0.147596	0.080794	0.913189	0.0323933	0.00622071	0.0659774	0.0723056	-0.0127039	0.0375316	0.0298009	0.0387426	0.0266368
	H60b	4.56342	0.164215	0.04589	0.79881	2.11293	0.152068	0.148398	0.744088	NA	NA	NA	NA	NA	NA	NA	NA	-0.264369	-0.413181	-0.09185	-0.287765	NA	-0.269342	-0.280212	-0.332832	-0.150839
	Tbc1d17	4.20483	0.121689	0.0518729	0.798942	0.00097102	0.000175056	0.999029	0.999122	0.372176	0.0215417	0.693308	0.966974	3.30147	0.19109	0.0548935	0.890526	-0.0443684	-0.0267892	-0.0675274	-0.0978824	0.0106287	-0.0451219	-0.0436268	-0.0619859	-0.0284494
	Rnf123	4.24175	0.153935	0.0534112	0.798977	2.15683	0.156545	0.143173	0.741043	NA	NA	NA	NA	NA	NA	NA	NA	-0.141082	NA	-0.306519	-0.157674	0.00177382	-0.222252	-0.0779499	-0.0927878	-0.174862
	Ptbp3	4.1221	0.12327	0.0540462	0.79899	1.94072	0.118182	0.166405	0.767728	0.384834	0.0230167	0.684864	0.964324	0.833172	0.0498316	0.447368	0.953328	0.0273949	-0.000531063	0.00408251	0.0625543	0.0391484	0.0015691	0.0508514	0.0329122	0.0216154
	Zfp280d	5.07892	0.388329	0.0542577	0.798995	NA	NA	NA	NA	NA	NA	NA	NA	NA	NA	NA	NA	0.373558	NA	NA	NA	NA	0.5	NA	0.566667	NA
	Ccdc117	4.19753	0.124922	0.0520606	0.799208	1.90213	0.111576	0.171999	0.769131	0.689633	0.0410482	0.511838	0.932358	0.610053	0.0363114	0.551881	0.967837	0.0409583	0.00405895	0.0139391	0.107096	0.0283105	0.0104709	0.0677031	0.0613062	0.0211248
	Phkb	4.2583	0.101282	0.050521	0.799457	3.19456	0.159026	0.0596658	0.578113	3.15107	0.149894	0.0617347	0.634091	1.04722	0.0498155	0.367053	0.934097	0.106478	0.177687	0.00865766	0.0882693	0.120301	0.0998187	0.104285	0.143174	0.0644793
	Fbxo22	4.22472	0.119682	0.0513655	0.799465	0.92827	0.0468129	0.409546	0.87941	0.873463	0.0494886	0.430899	0.914899	2.23568	0.126669	0.129643	0.898124	0.0241486	0.0118063	0.0582921	0.00107743	0.0210697	0.0387173	0.0110736	0.00731181	0.0396809
	Clp1	4.15833	0.135864	0.0530821	0.799485	1.29573	0.0846973	0.29294	0.841221	0.311804	0.0203751	0.735171	0.969941	0.116514	0.0076137	0.89054	0.99658	-0.0790886	0.00922596	-0.0647259	-0.121409	-0.136617	-0.0281466	-0.129013	-0.0574638	-0.100671
	Cdkn1b	4.04684	0.0878429	0.0561131	0.799513	5.79649	0.230447	0.00915182	0.26859	3.2794	0.142369	0.0558434	0.601528	0.435193	0.0188931	0.652359	0.975176	0.017108	0.0247499	-0.00238093	0.0475147	-0.00361142	0.00996111	0.0219517	0.0393323	-0.00299617
	Pck2	4.33665	0.140741	0.0486116	0.799718	1.07503	0.0649859	0.357826	0.872022	0.593201	0.0385032	0.560791	0.944132	0.069987	0.00454268	0.932604	1.0028	-0.0551283	-0.0668259	-0.0496562	-0.0794972	-0.0244883	-0.0558094	-0.0519927	-0.0761016	-0.0370722
	Aen	4.18249	0.13281	0.0524499	0.799738	1.3291	0.0862287	0.284296	0.827786	0.282475	0.0179394	0.756493	0.972226	0.543261	0.0345013	0.588123	0.972973	0.0675972	0.0844142	0.0656242	0.0042636	0.114013	0.0729678	0.0591385	0.0442001	0.0898188
	Traf6	4.12527	0.115926	0.0539611	0.799747	0.332803	0.022439	0.720307	0.974948	0.759474	0.0426847	0.479291	0.92955	3.13774	0.17635	0.0623843	0.908359	-0.0291424	-0.0615651	-0.018245	-0.0376696	-0.0108546	-0.0350887	-0.0242621	-0.045266	-0.0145498
	Hcfc2	4.463	0.188093	0.0518129	0.8	2.13231	0.179732	0.153102	0.750179	NA	NA	NA	NA	NA	NA	NA	NA	0.232214	0.0982128	NA	0.273477	NA	0.211282	0.326788	0.204498	0.278575
	Dapk1	3.9772	0.111357	0.0581057	0.8	1.61616	0.0950149	0.220419	0.800522	2.14349	0.12003	0.140082	0.772366	0.60966	0.0341395	0.552087	0.96718	0.0252877	0.0338419	0.062154	0.00757097	-0.000136729	0.0480197	0.00371712	0.020903	0.0310086
	Zfp30	3.97159	0.115967	0.0582695	0.8	0.181208	0.0133708	0.835441	0.983166	1.25784	0.0734553	0.303102	0.893121	2.19902	0.128419	0.133689	0.906031	0.0967208	-0.0428593	0.140931	0.0938882	0.155739	0.0669089	0.124814	0.0378588	0.148335
	Hnrnpk	4.14907	0.122619	0.0533266	0.800256	2.88909	0.166867	0.0759697	0.636901	0.0584863	0.00345695	0.943331	0.994721	0.396356	0.0234274	0.677274	0.9754	0.0222959	0.0217642	0.042688	0.0174987	0.00893982	0.0336958	0.0132192	0.0182541	0.0258139
	Akirin2	4.22994	0.143161	0.051233	0.800268	0.127303	0.00816963	0.881083	0.989214	0.301526	0.0204102	0.742568	0.971453	0.729535	0.0493819	0.492959	0.961053	-0.0626058	-0.0425042	-0.106026	-0.0778046	-0.020008	-0.0768398	-0.0489063	-0.0605164	-0.0630171
	Camk1	4.24064	0.147514	0.0509632	0.80027	0.19571	0.0157936	0.823606	0.980455	0.405838	0.0282349	0.671097	0.962339	0.151788	0.0105602	0.860024	0.995719	0.0748906	0.0368915	0.0732001	0.0471177	0.137208	0.0554539	0.0921626	0.0422861	0.105204
	Rnf7	4.24447	0.111817	0.050867	0.80027	2.8591	0.1564	0.0778146	0.64511	1.36567	0.0719546	0.27514	0.88036	1.13254	0.0596718	0.339532	0.930777	0.0263053	0.010989	-0.0184349	0.0309706	0.0780406	-0.00321418	0.0545056	0.0211915	0.0298029
	Magi1	4.11558	0.13267	0.0542218	0.800504	0.962272	0.0696382	0.396878	0.887984	0.86563	0.0558088	0.434049	0.914546	0.124939	0.00805503	0.883146	0.994475	0.044174	0.0120022	0.0304582	0.0503525	0.0745736	0.0229972	0.062463	0.0335174	0.0525159
	Paqr9	4.02485	0.109783	0.0567336	0.800721	0.337477	0.0187601	0.717042	0.974506	1.96083	0.106969	0.163568	0.807123	2.52016	0.137482	0.102415	0.899263	-0.020271	0.013984	-0.0449536	-0.0263497	-0.019936	-0.0177363	-0.0231428	-0.00832865	-0.0324448
	Pum2	4.06849	0.104567	0.0560554	0.800732	1.20869	0.0716918	0.317659	0.84725	1.4113	0.0725453	0.265052	0.868269	3.79979	0.195321	0.0382392	0.930688	-0.0813189	-0.285936	0.00757355	-0.00403141	-0.0940361	-0.118216	-0.0490338	-0.124848	-0.0432313
	Antxr2	4.15141	0.149385	0.0532646	0.801285	0.0703535	0.0053804	0.932264	0.990413	0.22508	0.0161986	0.80019	0.975702	0.0238869	0.00171909	0.97642	1.00252	-0.0256652	-0.0260543	-0.0290818	-0.0196926	-0.0266446	-0.0280608	-0.0231686	-0.0227596	-0.0278632
	A930028C08Rik	4.15869	0.121202	0.0530725	0.801292	3.22677	0.188097	0.058182	0.572553	0.25272	0.0147308	0.778814	0.977873	0.0971318	0.00566169	0.907807	0.998822	0.0401209	0.071418	0.0780048	-0.0137086	0.0249013	0.074611	0.00559635	0.0285338	0.0514531
	Mcm2	6.39317	0.56114	0.052628	0.801305	NA	NA	NA	NA	NA	NA	NA	NA	NA	NA	NA	NA	0.424637	NA	NA	NA	NA	0.313526	NA	0.583333	NA
	Rpl36al	4.36694	0.245581	0.0586042	0.801392	0.707581	0.0795835	0.512286	0.925234	NA	NA	NA	NA	NA	NA	NA	NA	-0.195322	-0.114579	NA	NA	NA	-0.117403	-0.284123	-0.255066	-0.152844
	Lsm11	4.16279	0.1039	0.0529646	0.801554	3.85507	0.195767	0.0359857	0.514689	1.43492	0.071629	0.258668	0.861991	1.16126	0.0579682	0.330782	0.9306	-0.044625	-0.138179	-0.0803525	-0.0279402	0.0544336	-0.10577	0.0132467	-0.077411	-0.0129594
	Aldh5a1	3.97738	0.0736233	0.0581004	0.801639	7.43299	0.293671	0.00323597	0.155914	3.69736	0.13688	0.0405221	0.569714	2.39266	0.0885786	0.113761	0.897697	0.0358899	0.04844	0.052248	0.0496035	0.0048283	0.0499127	0.0272159	0.0468468	0.0285381
	1810037I17Rik	4.03355	0.103863	0.0564871	0.801691	4.53926	0.235548	0.0217975	0.39777	0.886223	0.0456401	0.425822	0.912442	0.475366	0.0244812	0.62763	0.973862	0.0171897	0.02989	0.0320861	-0.00388761	0.00711977	0.0324464	0.00161608	0.0138582	0.0196029
	Hn1	4.05261	0.138732	0.0559512	0.801711	0.187354	0.0140923	0.830403	0.982242	0.132038	0.00903998	0.876968	0.985654	0.760257	0.0520511	0.478939	0.957084	0.0461658	0.0450572	0.0346541	0.0226619	0.0766042	0.0415223	0.0496331	0.0357136	0.0556291
	Sh3bgrl3	4.12532	0.111486	0.0539596	0.801777	1.40688	0.0880611	0.265203	0.818985	1.74392	0.094258	0.197168	0.820986	1.78805	0.0966437	0.189766	0.929882	0.0298546	-0.0176868	0.0247333	0.0298278	0.0677389	0.00858492	0.0487833	0.0110141	0.0462361
	Lrig2	4.13102	0.138282	0.0538068	0.801781	0.513219	0.0344736	0.60526	0.952842	0.186231	0.0124677	0.831321	0.978769	0.672036	0.0449914	0.520413	0.964659	0.0433125	0.0176339	0.0285448	0.0757544	0.0448715	0.0260053	0.060313	0.049613	0.0367082
	Cadm4	4.2963	0.18121	0.0537131	0.801786	1.20631	0.10176	0.323669	0.848408	NA	NA	NA	NA	NA	NA	NA	NA	-0.2056	NA	-0.382353	NA	-0.170189	-0.259395	-0.173604	-0.052641	-0.261116
	Fez2	4.02611	0.100667	0.0566979	0.802169	3.68516	0.182624	0.0408981	0.529639	0.893326	0.0446725	0.423024	0.914174	1.9057	0.0952983	0.171473	0.920261	-0.0345875	-0.0117257	-0.0970877	-0.026404	-0.0104368	-0.0548876	-0.0184204	-0.0149571	-0.0537623
	Atm	4.62726	0.189964	0.0508535	0.802439	0.096386	0.0103945	0.908756	0.992579	1.24921	0.102568	0.318979	0.902168	2.02009	0.165863	0.172206	0.922258	-0.315577	0.0284314	-1	-0.275701	-0.206804	-0.382941	-0.253866	-0.123635	-0.580044
	Oasl1	5.18165	0.425365	0.0569441	0.802638	NA	NA	NA	NA	NA	NA	NA	NA	NA	NA	NA	NA	0.306499	NA	NA	NA	NA	0.267748	NA	0.456053	NA
	Dennd4c	4.00034	0.0939431	0.0574347	0.80285	6.60694	0.311184	0.00540515	0.217949	0.889188	0.041763	0.424651	0.912786	0.294991	0.013855	0.747313	0.987497	-0.0302617	-0.0590524	-0.0112855	-0.0233599	-0.0222054	-0.0344968	-0.0227826	-0.0437256	-0.0167454
	Pex11b	4.10202	0.130662	0.054589	0.803	0.634787	0.0368667	0.539083	0.932001	1.4341	0.0913612	0.258856	0.86189	0.0771576	0.00491542	0.925983	1.00309	0.0500535	0.0410209	0.0507874	0.060654	0.0455173	0.0487227	0.0530857	0.0491431	0.0481523
	Stab2	4.29913	0.205423	0.0585649	0.803023	1.81454	0.173406	0.201831	0.791643	NA	NA	NA	NA	NA	NA	NA	NA	-0.296345	NA	-0.324324	-0.198698	NA	-0.409088	-0.198698	-0.271647	-0.382883
	Arhgap5	4.16349	0.130442	0.0529463	0.803117	0.519677	0.0277118	0.601531	0.952473	0.876997	0.0549527	0.429486	0.913814	0.980694	0.0614504	0.390193	0.945493	-0.0375087	-0.0684713	-0.0452491	0.00959057	-0.0500592	-0.0563664	-0.0202343	-0.0250665	-0.0476542
	Csnk1a1	3.99526	0.119691	0.0575813	0.803318	2.10398	0.134191	0.144833	0.743703	0.878168	0.0526168	0.429019	0.9136	0.21011	0.0125891	0.812033	0.993115	-0.01181	-0.0209942	-0.00616405	-0.0131069	-0.0103545	-0.0127316	-0.0117307	-0.0160332	-0.00825926
	1700034J05Rik	4.16946	0.140067	0.0527897	0.803385	1.057	0.0710637	0.363778	0.87244	0.110917	0.00745218	0.895489	0.98724	0.131154	0.00881185	0.877734	0.995693	0.0386948	0.0469624	0.0662337	0.0274253	0.0120106	0.0576447	0.019718	0.0376243	0.0391222
	Fyttd1	4.05547	0.114442	0.0558714	0.803431	0.369382	0.0209279	0.695187	0.972235	0.0721498	0.004072	0.930601	0.995093	3.74924	0.2116	0.0389646	0.901005	-0.0291622	-0.00978014	-0.0451864	-0.0557072	-0.00564632	-0.0266906	-0.0306768	-0.032902	-0.0254164
	Snd1	3.97836	0.119515	0.0580718	0.803521	1.22375	0.0730956	0.312573	0.848013	0.00992358	0.000596232	0.99013	0.998657	1.92098	0.115417	0.169242	0.92439	0.0328407	0.00231098	0.0582983	0.064056	0.00756961	0.0314295	0.0358128	0.0325311	0.032934
	Ubxn2a	3.99005	0.130168	0.0577319	0.803546	0.481319	0.0360962	0.624054	0.953886	0.669947	0.0437115	0.521441	0.932847	0.680258	0.0443843	0.516387	0.963741	-0.0853705	-0.0283076	-0.0467756	-0.052856	-0.195273	-0.0431405	-0.124064	-0.0452736	-0.121024
	C2	4.07001	0.113435	0.0554673	0.804198	0.600302	0.0270045	0.557018	0.937532	3.29232	0.18352	0.0552852	0.601327	0.512186	0.0285502	0.605859	0.97574	0.0189065	0.0355062	-0.0118509	0.0430825	0.0145678	0.00834051	0.0288251	0.0387982	0.00135846
	Gm25450	9.42955	0.75864	0.0545299	0.804261	NA	NA	NA	NA	NA	NA	NA	NA	NA	NA	NA	NA	0.0460594	NA	NA	NA	NA	0.0535575	NA	NA	NA
	Fahd2a	4.05826	0.11776	0.0557937	0.804423	1.18226	0.0705759	0.324536	0.848918	0.427846	0.02483	0.656995	0.958801	2.09175	0.121395	0.146339	0.931339	-0.0720788	-0.000788768	-0.04664	-0.0661266	-0.151941	-0.0298416	-0.109034	-0.0440079	-0.0992908
	Ngdn	4.00129	0.111323	0.0574074	0.804524	1.26145	0.0672465	0.302117	0.841469	0.203816	0.0113411	0.817069	0.978678	3.0056	0.167243	0.0692411	0.902778	0.026677	0.0670228	0.0356297	-0.0152188	0.02762	0.0486154	0.00620061	0.0208307	0.0316248
	1700066M21Rik	4.07098	0.166446	0.0579743	0.804706	0.693679	0.0567233	0.511953	0.926061	NA	NA	NA	NA	NA	NA	NA	NA	0.107202	0.00925058	NA	0.0792827	0.160975	0.0503837	0.115664	0.0502406	0.195854
	Emcn	3.9864	0.127488	0.057838	0.804717	0.370426	0.0239525	0.694485	0.973201	1.38757	0.0887517	0.269809	0.870492	0.383144	0.0245065	0.685985	0.976888	-0.0849472	-0.175216	-0.0220637	-0.0815292	-0.0591912	-0.098236	-0.0703602	-0.128599	-0.0406274
	Ahnak2	4.0943	0.0860697	0.0547992	0.804988	2.77298	0.115948	0.0833884	0.653949	6.51588	0.273951	0.0057278	0.289583	0.948806	0.0398912	0.401843	0.932614	0.019943	0.0287538	-0.0193969	0.0710764	0.00347412	0.0024339	0.0372753	0.0512143	-0.00796139
	2510009E07Rik	4.0034	0.129977	0.0573468	0.805251	1.37666	0.0867921	0.27245	0.824095	0.0531885	0.00345371	0.948318	0.996554	0.468857	0.0304445	0.631567	0.974253	-0.0333155	-0.0387798	0.00298883	-0.0395967	-0.057011	-0.0157141	-0.0483039	-0.0402641	-0.0270111
	Dpagt1	4.07381	0.116567	0.0553621	0.805693	2.42114	0.136426	0.111113	0.700118	0.436128	0.0249585	0.651771	0.957108	1.07994	0.0618022	0.356223	0.93549	0.0453703	0.00301581	-0.00309757	0.121291	0.0544843	0.00148662	0.0878877	0.0669587	0.0256934
	Lgals9	4.06027	0.126971	0.0557375	0.805911	0.526406	0.0334061	0.597672	0.953094	0.568622	0.0355633	0.574066	0.948452	1.36383	0.0852981	0.275592	0.937358	-0.0632396	-0.0986638	0.00576137	-0.0572566	-0.110654	-0.0427554	-0.0839553	-0.076939	-0.0524464
	Gosr1	3.90142	0.127287	0.060366	0.805923	0.931518	0.0563361	0.408317	0.878269	0.456492	0.029787	0.639119	0.953488	0.486505	0.0317454	0.620955	0.973461	0.0408729	0.0548192	0.0796009	-0.0114222	0.0389402	0.0700947	0.013759	0.0205605	0.0592706
	Fggy	4.00635	0.115232	0.057262	0.805981	2.75102	0.156517	0.0848784	0.658443	0.167642	0.00964358	0.846681	0.98	0.961946	0.0553359	0.396997	0.948303	-0.0831466	-0.177686	-0.0160508	-0.0401335	-0.100597	-0.0901439	-0.0703653	-0.109343	-0.058324
	Pigt	3.89666	0.139245	0.0605114	0.806136	0.120042	0.00966614	0.887435	0.991466	0.191403	0.0136794	0.827102	0.978249	0.232297	0.016602	0.794548	0.993474	0.0342352	0.00510943	0.043045	0.0433175	0.0415891	0.0254595	0.0424533	0.0251807	0.0423171
	Clmp	3.90569	0.116653	0.060236	0.806393	1.24401	0.0663531	0.306905	0.847758	1.63544	0.0976928	0.216726	0.835803	0.40837	0.0243939	0.669458	0.976471	-0.0134857	-0.0254434	-0.0131913	-0.00328758	-0.0127752	-0.0199491	-0.00803141	-0.0131374	-0.0129833
	B3galt6	3.88768	0.0820451	0.0607864	0.806576	6.93267	0.274884	0.00440311	0.183486	1.74239	0.0735421	0.19743	0.820952	1.57344	0.0664114	0.228845	0.935835	-0.0320678	-0.0491039	-0.0660398	0.000740612	-0.0151011	-0.0624569	-0.00718026	-0.0207237	-0.0405705
	Kif1c	4.07718	0.132465	0.0552692	0.8067	0.132606	0.00858265	0.876475	0.988545	0.208394	0.0135412	0.813403	0.979324	1.51006	0.0981217	0.241999	0.935997	-0.0127663	-0.0147837	-0.00527456	-0.00886786	-0.0209096	-0.0106636	-0.0148887	-0.0121368	-0.0130921
	Kpna6	4.08226	0.116389	0.0551292	0.806716	0.141598	0.0113359	0.868721	0.987704	2.19898	0.12539	0.133693	0.767226	1.65549	0.0943987	0.212958	0.92772	0.0214132	0.011891	0.0213734	-0.0114906	0.0638761	0.0161163	0.0261928	-0.00123235	0.0426247
	Serbp1	3.91331	0.112771	0.0600048	0.806865	2.80604	0.170975	0.0811991	0.652905	0.683265	0.0393795	0.514923	0.933967	0.404809	0.0233309	0.671765	0.976411	-0.0205402	0.00305443	-0.0176522	-0.031771	-0.0292468	-0.00834199	-0.0305089	-0.0167273	-0.0234495
	F3	3.85207	0.0996287	0.0618917	0.807111	2.44355	0.126583	0.109077	0.697608	1.55885	0.080635	0.231804	0.842076	1.90369	0.098473	0.171769	0.921001	0.038203	-0.0343263	0.0191416	0.0524038	0.105105	-0.00447621	0.0787543	0.0142771	0.0621232
	Zdhhc17	3.85402	0.13041	0.0618305	0.808018	0.428075	0.0313142	0.65685	0.964167	0.849554	0.0574935	0.440591	0.919985	0.0718767	0.00486425	0.930854	1.00239	0.0416472	0.0799683	0.0438643	0.0577779	-0.0100407	0.0611275	0.0238686	0.0674731	0.0169118
	Abcb10	3.91626	0.131839	0.0599156	0.808257	0.0190453	0.000385151	0.98115	0.996522	1.14677	0.0772109	0.335166	0.904479	0.22849	0.015384	0.797519	0.99319	0.0716123	0.0840418	0.062252	0.0368391	0.0966659	0.07715	0.0667525	0.0594602	0.079459
	Obsl1	6.63829	0.624	0.0615553	0.808277	NA	NA	NA	NA	NA	NA	NA	NA	NA	NA	NA	NA	-0.0581749	NA	NA	NA	NA	NA	-0.0395759	NA	NA
	Gm10277	4.1486	0.206364	0.0597187	0.808506	0.477341	0.0474889	0.62954	0.955405	NA	NA	NA	NA	NA	NA	NA	NA	-0.168336	NA	-0.075431	-0.286063	-0.114809	-0.167026	-0.189035	-0.3	-0.0916213
	Nbas	3.86779	0.123577	0.0614009	0.80852	0.192018	0.0128873	0.826601	0.980535	1.5911	0.101672	0.22532	0.84172	0.432361	0.027628	0.654142	0.973599	-0.0308239	-0.00686643	-0.0390499	-0.00846866	-0.0652215	-0.0238726	-0.0368451	-0.00922094	-0.0521357
	Recql5	3.94156	0.170334	0.0617331	0.808929	0.099304	0.00858282	0.905934	0.993698	NA	NA	NA	NA	NA	NA	NA	NA	-0.199086	NA	0.0602721	-0.178887	-0.269871	-0.135819	-0.228096	-0.240461	-0.153989
	Ccdc58	3.9387	0.156169	0.0610771	0.809255	0.641016	0.0508324	0.537241	0.932878	NA	NA	NA	NA	NA	NA	NA	NA	-0.129578	NA	-0.186278	0.0277195	-0.209637	-0.222662	-0.090959	-0.0144131	-0.192224
	Nhsl1	4.51107	0.270445	0.059628	0.809447	1.08455	0.13004	0.374722	0.876848	NA	NA	NA	NA	NA	NA	NA	NA	-0.0853151	NA	NA	NA	-0.151818	-0.0249905	-0.142506	NA	-0.101513
	Cox14	3.86887	0.105326	0.0613676	0.809663	2.73304	0.149344	0.0861193	0.661538	1.85044	0.100753	0.179816	0.81755	0.348208	0.0189592	0.70961	0.984067	-0.028113	0.00968268	-0.0154345	-0.0420858	-0.0608809	-0.00472454	-0.0514833	-0.0156231	-0.0381577
	Gm26347	5.29378	0.468734	0.0610317	0.809955	NA	NA	NA	NA	NA	NA	NA	NA	NA	NA	NA	NA	-0.403308	NA	NA	NA	NA	NA	NA	NA	-0.310345
	Asic2	5.28178	0.468169	0.0612504	0.810135	NA	NA	NA	NA	NA	NA	NA	NA	NA	NA	NA	NA	0.326947	NA	NA	NA	0.251994	NA	0.326947	NA	0.251994
	Zfp874b	3.93444	0.125736	0.0593689	0.810185	0.899637	0.0627687	0.420554	0.881294	0.442095	0.0282566	0.648036	0.95734	0.836736	0.0534803	0.445884	0.95366	-0.0329042	-0.0445619	-0.0546356	-0.0345707	-0.000553915	-0.0503817	-0.0175623	-0.0394743	-0.0275948
	Htt	3.84169	0.130171	0.0622183	0.810865	0.390233	0.0266514	0.681296	0.971508	0.0467558	0.00316854	0.954411	0.99675	0.898448	0.0608858	0.421018	0.934891	0.051754	0.0561917	0.00927518	0.0389207	0.105863	0.029042	0.0723919	0.0458818	0.0575691
	Gm12785	4.07427	0.141424	0.059603	0.811316	0.197075	0.00327699	0.822978	0.98048	2.94749	0.204624	0.0796201	0.684497	0.722717	0.0501733	0.499759	0.960759	0.064829	0.126371	-0.0250952	0.0807309	0.0726427	0.0456693	0.0828105	0.103113	0.0291796
	AI987944	4.01574	0.202507	0.0634811	0.823673	0.407208	0.0410695	0.672645	0.970431	NA	NA	NA	NA	NA	NA	NA	NA	0.216464	-0.125749	0.268955	NA	0.241855	0.125346	0.316536	0.0709275	0.263021
	Pde8a	3.96572	0.205581	0.0649693	0.831155	0.162317	0.0168288	0.851645	0.984025	NA	NA	NA	NA	NA	NA	NA	NA	0.188638	0.171012	NA	0.175336	0.270802	0.143549	0.217372	0.144998	0.236811
	Ltbr	3.75473	0.0945842	0.0650315	0.831304	0.863098	0.0467823	0.435072	0.895985	4.88205	0.245964	0.0170919	0.454011	0.72612	0.0365829	0.494545	0.96034	0.0330512	0.0172658	0.0313758	0.079225	0.011827	0.0209814	0.045526	0.0488533	0.0216014
	Ubxn11	3.75743	0.098814	0.064942	0.832969	0.318647	0.0219987	0.730291	0.976766	3.33989	0.175667	0.0532808	0.592099	1.97541	0.1039	0.161544	0.934941	0.0294185	-0.0219997	0.0429944	0.017613	0.0643398	0.0172014	0.0409764	0.00146796	0.0536671
	AC122371.1	3.74532	0.100947	0.0653446	0.833766	3.25157	0.164113	0.0570672	0.574656	0.704668	0.0379854	0.504634	0.934336	1.22212	0.0658788	0.313034	0.928016	-0.0394222	-0.0329279	-0.11423	-0.0260386	0.0162189	-0.0789213	-0.00490986	-0.0274061	-0.0490056
	Zbtb12	4.31934	0.296877	0.064381	0.833921	0.114948	0.0158013	0.892573	0.992154	NA	NA	NA	NA	NA	NA	NA	NA	-0.214453	NA	NA	NA	-0.0379346	-0.222973	-0.221024	-0.269537	-0.174322
	Tceb3	3.75983	0.0824857	0.0648628	0.834136	3.25937	0.162074	0.056721	0.575889	4.338	0.19034	0.025204	0.502016	1.81348	0.0795707	0.18564	0.927839	0.0219334	-0.0250151	0.0396078	-0.00290317	0.0615803	0.0120948	0.0293386	-0.00946288	0.0505941
	Itgam	3.79266	0.092945	0.0643528	0.83532	1.4736	0.0833577	0.250848	0.817767	2.30089	0.112774	0.123774	0.758493	3.73187	0.182911	0.0402237	0.913235	-0.0690296	-0.0535774	-0.0366248	0.0320816	-0.210097	-0.0421232	-0.0884129	-0.00637799	-0.126282
	Nus1	3.7454	0.117305	0.065342	0.835575	0.0575222	0.00294035	0.944236	0.992523	2.28846	0.143347	0.124049	0.757757	0.245731	0.0153924	0.78416	0.99313	-0.0301712	-0.040049	-0.0256005	-0.0543866	0.000774009	-0.0340431	-0.0268063	-0.047225	-0.0124133
	Ash1l	3.7618	0.126967	0.0647976	0.835746	1.25575	0.0832633	0.303673	0.843173	0.0114729	0.000774461	0.988598	0.998693	0.165929	0.0112008	0.848111	0.995504	-0.0315643	-0.0445533	-0.0529591	-0.0146011	-0.0169312	-0.04983	-0.0157661	-0.0277859	-0.0349452
	Atp13a3	3.73873	0.120852	0.0655649	0.836069	1.75095	0.114742	0.195968	0.791971	0.274372	0.0177379	0.762502	0.974031	0.0734865	0.00475082	0.929366	1.00345	-0.0193718	-0.0172691	-0.00763958	-0.0251264	-0.0305015	-0.0114931	-0.0278139	-0.0201829	-0.0190706
	Hist1h2bh	3.81998	0.117161	0.0647695	0.837143	1.91318	0.104761	0.17367	0.770185	1.71366	0.105118	0.205625	0.822824	0.765459	0.0469541	0.478272	0.958203	0.090375	0.00713596	0.267885	0.014329	0.0478577	0.144093	0.0290736	0.0151793	0.176811
	Rps5	3.64944	0.127194	0.0686344	0.837166	0.683492	0.0474794	0.514813	0.927382	0.219295	0.0152862	0.804744	0.976888	0.118431	0.00825537	0.888851	0.996212	0.0167179	0.0160391	0.00216061	0.0286639	0.0201211	0.0089599	0.0243925	0.0226216	0.0111409
	Crbn	3.63573	0.120794	0.06912	0.838163	1.47613	0.0989225	0.249377	0.816627	0.237072	0.015753	0.790838	0.975195	0.0182737	0.00121425	0.981906	1.00284	-0.105241	-0.0781615	-0.0293989	-0.206436	-0.115364	-0.0509486	-0.1609	-0.141376	-0.0723816
	Srsf2	3.63804	0.102758	0.0690377	0.838241	0.14498	0.0120833	0.865824	0.987066	1.59799	0.0902712	0.223961	0.838829	2.64008	0.149139	0.0928604	0.912241	0.0240435	0.0385881	-0.000816912	-0.00580117	0.064488	0.0181014	0.0293434	0.0142973	0.0318355
	Maml1	3.74362	0.154956	0.0688832	0.83832	0.124566	0.0103121	0.883634	0.989511	0.645982	0.0534769	0.535876	0.936989	0.437273	0.0361992	0.652475	0.97474	-0.146179	-0.225237	0.0286873	-0.162045	-0.199472	-0.100835	-0.173024	-0.190622	-0.106911
	Gm17494	4.74101	0.403799	0.0658946	0.838578	NA	NA	NA	NA	NA	NA	NA	NA	NA	NA	NA	NA	0.305841	0.25	NA	NA	NA	0.25	NA	0.369859	NA
	Gm16033	3.97475	0.204393	0.0694203	0.838821	1.73594	0.178534	0.217685	0.800661	NA	NA	NA	NA	NA	NA	NA	NA	-0.12916	-0.208114	-0.219048	NA	0.0238618	-0.213581	-0.0199084	-0.153571	-0.0975929
	Gm16034	3.97475	0.204393	0.0694203	0.838821	1.73594	0.178534	0.217685	0.800661	NA	NA	NA	NA	NA	NA	NA	NA	-0.12916	-0.208114	-0.219048	NA	0.0238618	-0.213581	-0.0199084	-0.153571	-0.0975929
	Mertk	3.64965	0.0761584	0.0686269	0.838889	0.834891	0.0356022	0.446652	0.903687	0.640109	0.0267147	0.536371	0.936309	9.1611	0.382335	0.00118512	0.5875	-0.0416389	0.0504468	-0.0957168	-0.165695	0.0491637	-0.025406	-0.0582654	-0.0623157	-0.0232766
	Wfdc12	4.62366	0.39778	0.0685862	0.839794	NA	NA	NA	NA	NA	NA	NA	NA	NA	NA	NA	NA	-0.170427	NA	NA	-0.146368	NA	NA	-0.170427	-0.146368	NA
	Clcn4-2	3.71751	0.112268	0.0662798	0.839914	2.38652	0.13665	0.114341	0.705069	0.310364	0.0187457	0.736203	0.969645	0.500855	0.0302513	0.61247	0.977718	0.0330386	0.0281026	0.0825633	0.0145189	0.0105038	0.0571108	0.0125114	0.0180762	0.0465335
	Smek2	3.65301	0.117768	0.0685085	0.840496	2.00831	0.129313	0.157078	0.752182	0.0136196	0.000878153	0.986481	0.999088	0.160944	0.0103772	0.85229	0.995859	0.0410552	0.00597136	0.00741932	0.0795886	0.0686938	0.00749197	0.0741412	0.0444225	0.0380566
	Mmp2	3.65492	0.0810881	0.0684412	0.841201	3.78152	0.152113	0.0380287	0.529121	5.10809	0.226656	0.0145998	0.426627	0.319671	0.0141844	0.729564	0.985254	-0.0291087	-0.0119096	-0.0218853	-0.0361284	-0.0438342	-0.0147012	-0.0399813	-0.0285631	-0.0328597
	Tapt1	3.73447	0.105396	0.0662774	0.84172	0.14822	0.00428223	0.863095	0.986888	4.15806	0.234701	0.0293927	0.534066	0.542897	0.0306437	0.588649	0.973331	0.106061	-0.00258052	0.192281	0.0119342	0.18715	0.0964817	0.119332	0.0104556	0.189716
	Rnf138	3.70963	0.121066	0.0665478	0.841756	0.793538	0.0517516	0.464238	0.914097	0.567496	0.0370412	0.574682	0.948709	0.604817	0.0394772	0.554633	0.966754	-0.0312512	-0.0797649	-0.0226576	-0.0108271	-0.0166501	-0.0493167	-0.0137386	-0.0427877	-0.0196539
	Ephx1	3.58721	0.10405	0.0708708	0.842285	0.329586	0.0189489	0.722562	0.976069	2.50229	0.145162	0.103929	0.739106	1.11248	0.0645367	0.345795	0.936013	0.028485	0.00630023	0.0654499	0.03565	0.00597467	0.0360459	0.0208124	0.0230257	0.0357123
	Xylb	3.70601	0.131479	0.0701676	0.842308	2.7097	0.198983	0.0935989	0.67112	0.107128	0.00760119	0.898979	0.987654	0.423728	0.0300654	0.660964	0.975118	0.168035	-0.00987029	-0.00834393	0.315704	0.444692	-0.0227715	0.381957	0.164765	0.175051
	Man2b1	3.65807	0.0577664	0.0683307	0.84262	12.3359	0.401748	0.000229016	0.0566667	3.50355	0.110653	0.0469672	0.580151	2.49412	0.0787718	0.104629	0.903249	0.0224133	0.0252462	0.0282681	0.0149643	0.0295705	0.0265882	0.0222674	0.0174254	0.0289193
	Scn2b	5.26266	0.512797	0.070293	0.842626	NA	NA	NA	NA	NA	NA	NA	NA	NA	NA	NA	NA	0.331648	NA	NA	NA	0.320984	NA	0.320984	NA	0.331648
	Atpaf2	3.67263	0.116799	0.0683951	0.842739	0.0637885	0.00113779	0.938376	0.99163	2.7433	0.174488	0.086361	0.701597	0.0785882	0.00499861	0.924679	1.0033	0.0601309	0.117793	-0.0127834	0.146547	-0.0146287	0.0489242	0.0713796	0.13395	-0.0143064
	Rbm48	4.01537	0.219513	0.0681941	0.843333	1.1384	0.124469	0.352615	0.869554	NA	NA	NA	NA	NA	NA	NA	NA	-0.203755	-0.0694444	NA	-0.5	NA	-0.0527645	-0.366298	-0.284722	-0.122787
	Ifi202b	3.58787	0.0348498	0.0708466	0.843373	22.1273	0.449525	4.37593e-06	0	14.5946	0.283521	8.0853e-05	0.0157895	1.46034	0.0283693	0.252893	0.929097	-0.014506	-0.0037207	-0.0378929	-0.0100457	0.00667416	-0.0248139	-0.00168579	-0.0105717	-0.0156094
	Ndufs2	3.70346	0.113667	0.0667582	0.84359	0.999815	0.0653099	0.383384	0.879586	1.06969	0.0656623	0.359576	0.907446	0.869605	0.05338	0.432447	0.949119	0.0101731	0.00380996	0.00245472	0.020329	0.012766	0.00311555	0.0165475	0.0124284	0.00761034
	Gm14137	3.66124	0.139422	0.0701154	0.843611	0.171487	0.0130606	0.843637	0.983669	0.986943	0.0751665	0.39015	0.919358	0.141044	0.010742	0.869308	0.996308	0.135237	0.235841	0.106294	0.21942	-0.0349375	0.177843	0.100394	0.227518	0.0280281
	Rab10	3.58902	0.106013	0.0708045	0.844668	0.00449861	0.000222534	0.995512	0.999948	0.332872	0.0196649	0.720258	0.971301	3.29533	0.194677	0.0551557	0.894056	0.0187118	-0.00346449	0.0426815	0.0267507	0.00891275	0.0196373	0.0178317	0.0113713	0.0257971
	Rpusd2	3.66227	0.115237	0.0681834	0.845094	0.0444936	0.000968327	0.956564	0.995851	1.63848	0.103113	0.216151	0.835342	0.876002	0.0551288	0.429884	0.95155	-0.0807679	-0.158633	0.00284854	-0.0881898	-0.0927403	-0.0698761	-0.090465	-0.123727	-0.0449459
	Fam114a2	3.58962	0.115012	0.0707826	0.846169	1.15697	0.074155	0.332074	0.860761	0.100264	0.00642491	0.904992	0.988401	1.05341	0.0675028	0.364976	0.934837	-0.0530958	-0.0764578	0.0210975	-0.0530571	-0.108662	-0.0255936	-0.0808594	-0.062498	-0.0437821
	Slc35e3	3.66331	0.131844	0.0681471	0.846444	0.196947	0.0162882	0.822604	0.980273	0.237526	0.0170973	0.790487	0.975567	0.126502	0.0091057	0.881781	0.994811	-0.037799	-0.026908	-0.0328161	-0.0287347	-0.0573376	-0.0314309	-0.0430361	-0.0293091	-0.0450769
	Helz	3.664	0.121939	0.0681229	0.847589	0.437362	0.0339422	0.650997	0.963392	0.682402	0.0454211	0.515343	0.933912	0.572119	0.0380806	0.572156	0.971178	0.0592906	0.118492	0.0404205	0.0735244	0.0233469	0.0727383	0.0484356	0.0899108	0.0318837
	Trim29	3.90865	0.137466	0.0680745	0.848319	5.26251	0.37016	0.0197529	0.385827	NA	NA	NA	NA	NA	NA	NA	NA	0.145282	0.0882346	0.174117	0	NA	0.130031	0	0.0894909	0.174117
	Pgd	3.39595	0.0984774	0.0782839	0.849084	0.898424	0.0485164	0.421028	0.882332	0.316546	0.0183587	0.731785	0.969718	2.82935	0.164094	0.079693	0.915328	-0.0404897	-0.00591451	-0.0213762	-0.108842	-0.0279232	-0.0102601	-0.0683828	-0.0581028	-0.0246497
	Amigo2	3.40243	0.0939834	0.0780189	0.849265	2.0313	0.107252	0.154036	0.749867	0.90471	0.0499806	0.418581	0.91248	1.964	0.108501	0.163126	0.931439	0.0533065	0.00260541	-0.0160738	0.166034	0.0503505	-0.004457	0.108192	0.0930887	0.0171383
	Lefty1	4.5	Inf	0.0781407	0.849358	NA	NA	NA	NA	NA	NA	NA	NA	NA	NA	NA	NA	0	NA	NA	NA	NA	NA	NA	0	NA
	Ttc19	3.48735	0.138026	0.0773452	0.849444	0.132854	0.0163362	0.8764	0.988601	1.05293	0.0833478	0.368409	0.907682	0.203515	0.0161099	0.817613	0.994033	0.143143	0.152461	0.16416	0.047122	0.235996	0.161267	0.125828	0.0890002	0.200078
	Aven	3.63418	0.10819	0.0718446	0.849501	1.20113	0.0751839	0.322696	0.848011	0.696989	0.041499	0.510376	0.932201	3.58013	0.213162	0.0479248	0.906531	0.215004	-0.142928	0.545171	0.271207	0.226676	0.201122	0.236563	0.0937206	0.344656
	Fam46a	3.66637	0.0987045	0.0680399	0.849895	0.614939	0.0352839	0.549327	0.93536	1.06291	0.0572305	0.361815	0.90599	3.56144	0.191759	0.0449324	0.902597	-0.029031	-0.0926718	0.000794133	-0.00811171	-0.0204291	-0.0452969	-0.0142704	-0.0489697	-0.00981747
	Slc16a11	3.97266	0.234062	0.0676645	0.85	NA	NA	NA	NA	NA	NA	NA	NA	NA	NA	NA	NA	-0.204856	NA	NA	NA	-0.325947	NA	-0.306352	NA	-0.201927
	AA987161	3.42415	0.114428	0.0777252	0.850369	0.469452	0.0369763	0.631466	0.95672	1.75829	0.117516	0.195706	0.823373	0.022272	0.00148856	0.977996	1.00281	-0.0675993	-0.139129	-0.0138693	-0.11647	-0.0188113	-0.0675522	-0.0676406	-0.126181	-0.0163403
	Strip1	3.47149	0.125885	0.0779679	0.85046	0.431221	0.019089	0.655918	0.963735	1.40847	0.10215	0.268916	0.870177	0.712888	0.0517022	0.502878	0.961289	-0.204761	-0.02242	-0.322425	-0.228319	-0.163928	-0.147091	-0.235212	-0.125369	-0.276714
	Slc48a1	3.41934	0.0925907	0.0773311	0.850835	3.55411	0.192008	0.0451846	0.544313	0.741825	0.040175	0.487298	0.934521	0.959236	0.0519493	0.397992	0.948586	0.019932	-0.0266648	0.0279792	0.0398681	0.0354517	0.00250983	0.0376599	0.00768794	0.0317154
	Zfp942	3.70196	0.120582	0.0680074	0.850844	1.88996	0.123219	0.175895	0.770326	0.646662	0.0421266	0.533909	0.935907	0.462855	0.0301525	0.635754	0.974719	-0.135176	-0.0196217	-0.101477	-0.119964	-0.266074	-0.066396	-0.207224	-0.0701681	-0.183776
	Bptf	3.42222	0.108523	0.0772149	0.850929	0.791264	0.0529547	0.465227	0.913521	0.989064	0.0627288	0.387197	0.919579	0.77585	0.0492063	0.471989	0.961265	0.108354	0.154384	0.21005	0.00995296	0.0668863	0.18409	0.0384196	0.0812906	0.138468
	AC124446.1	3.41267	0.0999119	0.0776017	0.851017	1.50276	0.0896029	0.243566	0.819372	0.49248	0.0288364	0.617407	0.954409	1.87681	0.109894	0.175781	0.915174	-0.0635787	-0.0657831	-0.0854963	-0.0836108	-0.0164109	-0.0740781	-0.0500108	-0.0749676	-0.0509536
	Tesk2	3.67981	0.121411	0.0675724	0.851168	0.199131	0.013798	0.82084	0.979808	0.731722	0.0482847	0.491946	0.936036	0.883589	0.058306	0.426865	0.951707	-0.108263	-0.0329455	-0.127137	-0.0564165	-0.219997	-0.0774701	-0.138207	-0.0388869	-0.173567
	Naglu	3.56086	0.118631	0.0718426	0.8512	0.519803	0.034595	0.601458	0.952847	0.114776	0.00764758	0.892073	0.987518	1.09313	0.0728358	0.351955	0.937989	-0.0516589	0.0208638	-0.076142	-0.104672	-0.0399389	-0.0308303	-0.0723054	-0.0456226	-0.0580405
	Cuedc1	3.68338	0.126013	0.0674489	0.851277	0.0370939	0.00325191	0.963643	0.997597	1.20105	0.0821787	0.319059	0.901479	0.0352148	0.00240949	0.96545	1.00022	0.0526049	0.0924145	0.0330144	0.0694998	0.0239491	0.0585919	0.0467244	0.0807504	0.0284818
	Fat4	3.66917	0.102907	0.0679422	0.851797	2.23212	0.12021	0.13003	0.728986	0.933015	0.0523353	0.407752	0.909759	1.32792	0.0744866	0.284595	0.930301	-0.0480745	0.0105039	-0.139264	-0.0382397	-0.0243771	-0.069457	-0.0313084	-0.0125799	-0.0818205
	Mapk6	3.53118	0.108158	0.0729557	0.852465	1.2791	0.0726411	0.297353	0.84006	0.52446	0.0321278	0.598785	0.949595	1.25501	0.0768804	0.303876	0.929856	0.0205639	0.00522541	0.062677	0.0108306	0.00153577	0.0365741	0.00618318	0.00806288	0.0321064
	Rilpl1	3.54009	0.165862	0.0771402	0.852514	0.401746	0.0376456	0.675339	0.969743	NA	NA	NA	NA	NA	NA	NA	NA	-0.218795	NA	-0.258987	-0.381953	-0.0759446	-0.269557	-0.198094	-0.329848	-0.15473
	Sik3	3.56565	0.122971	0.0722447	0.852789	0.128476	0.0090495	0.88009	0.988382	0.773765	0.0533708	0.473424	0.929602	0.812848	0.0560666	0.456477	0.953852	-0.0673298	-0.0318696	-0.0769124	-0.137567	0.00227623	-0.06417	-0.0676455	-0.0972632	-0.0373181
	Cenpc1	3.70044	0.0930049	0.0674332	0.852878	3.91097	0.187248	0.0352172	0.517442	1.33741	0.0672275	0.283045	0.881155	1.7952	0.0902393	0.189583	0.929812	-0.129069	-0.217759	-0.242646	0.173444	-0.214568	-0.224435	-0.0129649	-0.0123595	-0.2467
	Nipal3	3.5328	0.0959465	0.0728944	0.852964	0.608909	0.0388147	0.552481	0.93552	1.0636	0.0577724	0.361586	0.906276	3.47135	0.188555	0.0481418	0.904453	0.0546679	0.0774595	0.0723337	0.101343	-0.0114275	0.0671528	0.0449575	0.0827293	0.0304531
	Creb3l2	3.37939	0.103458	0.0789668	0.853005	0.505769	0.0312539	0.609594	0.95289	0.551365	0.0337596	0.583591	0.948978	2.08528	0.12768	0.147142	0.932902	-0.0772113	-0.213307	-0.0288933	-0.0121685	-0.060563	-0.120803	-0.0363658	-0.109981	-0.0447282
	Rasgrp3	4.26436	0.347703	0.0727888	0.853267	NA	NA	NA	NA	NA	NA	NA	NA	NA	NA	NA	NA	-0.13688	NA	NA	NA	-0.136818	NA	-0.13688	NA	-0.136818
	Repin1	3.38244	0.0896849	0.0788405	0.853285	1.10963	0.0565892	0.346696	0.869472	1.09558	0.0580984	0.351169	0.906692	3.46092	0.183532	0.0485293	0.895618	-0.0296452	-0.0437026	0.0115045	0.0066	-0.0930714	-0.013773	-0.0432357	-0.0192178	-0.0407835
	Bcl7a	4.54139	0.430815	0.0770971	0.853545	NA	NA	NA	NA	NA	NA	NA	NA	NA	NA	NA	NA	-0.328192	NA	NA	NA	NA	NA	NA	NA	-0.304383
	Perp	3.61637	0.147801	0.0724872	0.853678	0.925753	0.0756709	0.413384	0.88094	NA	NA	NA	NA	NA	NA	NA	NA	-0.0860374	NA	-0.0177044	-0.104922	-0.075646	-0.0741585	-0.0882891	-0.144075	-0.0522679
	Fam214a	3.52456	0.105443	0.0732066	0.85374	1.38133	0.0837026	0.271316	0.823294	0.724335	0.0433392	0.495376	0.936029	1.3452	0.0804875	0.280224	0.931442	0.0382473	0.0863141	0.0546983	0.0429005	-0.0232477	0.0674665	0.0098264	0.0618624	0.0157253
	Pkhd1l1	3.53849	0.115628	0.0726798	0.85377	1.19923	0.0801491	0.319583	0.847501	0.301277	0.0196898	0.742748	0.97158	0.5314	0.0347294	0.594825	0.9754	0.105956	0.245008	0.128542	0.0371284	0.0233342	0.184247	0.0302313	0.139968	0.0759379
	Vav3	4.2929	0.298618	0.0769968	0.854393	NA	NA	NA	NA	1.5415	0.214456	0.27879	0.88273	NA	NA	NA	NA	-0.19196	-0.147859	-0.312464	NA	NA	-0.230161	NA	-0.107498	-0.312464
	Apba1	3.61695	0.155566	0.0733212	0.854617	0.816692	0.0702521	0.45761	0.91049	NA	NA	NA	NA	NA	NA	NA	NA	0.156584	NA	0.0658561	0.199738	0.0420391	0.232499	0.114876	0.290168	0.0489587
	Fam58b	3.38274	0.0831595	0.0788281	0.854845	1.29632	0.0576304	0.292783	0.841947	1.14673	0.0563814	0.335177	0.904074	4.70444	0.231303	0.0193746	0.893617	0.0490576	-0.0232558	0.0532729	0.193267	-0.0373233	0.01602	0.0779719	0.093115	0.00797483
	Tdo2	7.02404	0.70072	0.0769747	0.855805	NA	NA	NA	NA	NA	NA	NA	NA	NA	NA	NA	NA	-0.335337	NA	NA	NA	NA	NA	NA	NA	NA
	Zfp71-rs1	3.43613	0.0888522	0.0793781	0.856	0.496274	0.0262808	0.61647	0.952992	6.28044	0.324802	0.0080583	0.313008	1.34142	0.0693733	0.285139	0.93133	0.106983	0.400215	-0.0550103	0.223964	-0.0787348	0.12704	0.0865102	0.284317	-0.0668725
	Msl2	3.42977	0.0957824	0.0769107	0.856473	1.06712	0.0627135	0.360425	0.872536	0.806642	0.0450538	0.458585	0.92146	2.81533	0.157246	0.0805951	0.913462	0.0248555	-0.00313064	0.0729828	0.04073	-0.0110413	0.0367069	0.0148444	0.019367	0.0309708
	Nfe2l1	3.47097	0.115216	0.075275	0.856814	1.58926	0.105215	0.225685	0.80589	0.205245	0.0136259	0.815923	0.979384	0.0328961	0.00218392	0.967685	1.00071	-0.00684419	-0.001681	-0.00504697	-0.00801393	-0.0127042	-0.00346314	-0.010359	-0.00474984	-0.00887556
	A730071L15Rik	3.36242	0.108273	0.0796736	0.857065	0.427478	0.0286049	0.657228	0.963306	0.835809	0.0538279	0.44627	0.919754	1.08293	0.0697432	0.35525	0.938946	-0.0524356	-0.111676	-0.0102752	-0.0688802	-0.0334447	-0.0556199	-0.0511624	-0.0838463	-0.02186
	Dnajc7	3.36496	0.110916	0.0795674	0.857169	0.334013	0.0266203	0.71946	0.975235	1.08282	0.0713841	0.355286	0.907286	0.569642	0.0375531	0.573508	0.970988	-0.0428059	0.0233234	-0.0784345	-0.0310114	-0.0702389	-0.0332548	-0.0506251	-0.00866118	-0.0743367
	Bmpr2	3.43033	0.0889196	0.0768882	0.857895	3.49574	0.185546	0.0472493	0.551724	1.43838	0.0745699	0.257874	0.86123	1.13968	0.0590845	0.337335	0.931516	0.02688	6.62964e-05	-0.0238936	0.0704796	0.0575085	-0.0127655	0.063994	0.0361624	0.0168075
	Agap3	3.4627	0.0903533	0.0756001	0.857935	1.45861	0.0680715	0.253281	0.816927	4.11578	0.214789	0.0296512	0.534545	0.35625	0.0185915	0.704094	0.984967	-0.05218	-0.0813955	-0.0261921	-0.042098	-0.06071	-0.0563159	-0.051404	-0.0558874	-0.0434511
	Sppl3	3.33758	0.067344	0.0807209	0.858036	7.90481	0.295896	0.00243818	0.137647	3.25662	0.131421	0.0568428	0.605388	0.449869	0.0181545	0.643204	0.975328	-0.0258389	-0.0393692	-0.119264	0.0412633	0.0149556	-0.0840028	0.0281094	0.00423385	-0.052154
	Uhrf1bp1	3.49689	0.0946146	0.0742661	0.858171	0.858161	0.0365324	0.437075	0.89824	3.39431	0.183678	0.0510845	0.581293	0.978747	0.0529635	0.390894	0.94569	-0.0245598	-0.0243342	-0.0335884	-0.00622167	-0.0290801	-0.033026	-0.0176509	-0.0149413	-0.0313343
	4930506M07Rik	3.46471	0.0793112	0.075521	0.858429	2.55586	0.120051	0.0994641	0.676123	3.76228	0.172246	0.0385834	0.572455	2.29199	0.104933	0.123684	0.898027	-0.0776999	0.0301597	-0.00793381	0.0243182	-0.349891	0.0108949	-0.162787	0.0274598	-0.178913
	Ankzf1	4.35662	0.383619	0.0752748	0.858462	NA	NA	NA	NA	NA	NA	NA	NA	NA	NA	NA	NA	-0.416883	NA	NA	NA	NA	-0.380952	NA	-0.286364	NA
	Ncs1	3.64047	0.170092	0.0806	0.858676	2.88123	0.269237	0.0950757	0.670306	NA	NA	NA	NA	NA	NA	NA	NA	-0.214668	NA	-0.123122	NA	NA	-0.195898	-0.478559	NA	-0.147626
	Hist1h2af	3.47627	0.109445	0.0750676	0.858767	1.18477	0.0737013	0.323797	0.848293	1.01361	0.0638241	0.378552	0.922007	0.444774	0.0280062	0.646367	0.975455	-0.0390952	-0.0379591	-0.0500654	0.0020055	-0.0754615	-0.0438478	-0.036728	-0.0150006	-0.0627635
	Fis1	3.66042	0.156682	0.0737864	0.859412	1.85081	0.158446	0.18921	0.781764	NA	NA	NA	NA	NA	NA	NA	NA	0.254248	0.482043	0.258938	NA	0.0869694	0.376669	0.183929	0.378827	0.169298
	Mir1981	3.50996	0.114408	0.0749859	0.859459	1.0624	0.0660591	0.363482	0.872125	1.27459	0.0830913	0.300301	0.892941	0.747643	0.0487394	0.48567	0.961236	-0.0774144	-0.0251319	0.00961391	-0.230516	-0.0327472	-0.0105687	-0.131631	-0.142494	-0.0150079
	Tarsl2	3.69159	0.133452	0.0768859	0.85951	5.48534	0.396594	0.0187374	0.38954	NA	NA	NA	NA	NA	NA	NA	NA	0.155484	NA	0.430506	NA	-0.174743	0.431204	-0.107223	0.307144	0.0948249
	Cchcr1	3.62572	0.17826	0.0762552	0.859583	0.856924	0.0842618	0.444233	0.902378	NA	NA	NA	NA	NA	NA	NA	NA	-0.263563	-0.355604	NA	0.0736035	-0.421941	-0.481677	-0.136683	-0.106749	-0.535815
	Evi5	3.51232	0.117382	0.0742563	0.859649	0.186193	0.0123204	0.831408	0.982718	1.86782	0.124845	0.178142	0.823254	0.150939	0.0100888	0.860783	0.996052	-0.0681365	-0.0802701	-0.100541	-0.0387344	-0.0560337	-0.0918536	-0.047384	-0.0565354	-0.0782875
	Trappc1	3.34237	0.105446	0.0805177	0.859677	0.409803	0.0278597	0.668532	0.96979	1.46377	0.0923591	0.252124	0.853482	0.80394	0.0507259	0.459745	0.953452	0.0394623	0.0144162	0.0427558	-0.00416839	0.0987856	0.0298473	0.0473086	0.00716351	0.0707707
	Zbtb42	3.3543	0.105319	0.080014	0.859855	2.18144	0.133718	0.135678	0.728079	0.294747	0.0185091	0.747491	0.971206	0.271133	0.0170262	0.764919	0.99172	-0.0623273	-0.00879194	0.0246649	-0.116952	-0.143642	0.00959194	-0.130297	-0.0673083	-0.0594883
	Gda	3.49977	0.033461	0.0741552	0.859961	24.2362	0.48951	2.17413e-06	0	11.7624	0.224918	0.000303045	0.0333333	3.04779	0.0582795	0.0669666	0.905764	0.0121411	0.0144357	0.00449373	0.0385188	-0.000963526	0.00813037	0.0187777	0.0251372	0.0017651
	Ddx59	3.49188	0.118809	0.0763892	0.860038	0.483153	0.0355756	0.623851	0.9539	0.191554	0.013035	0.827172	0.978078	2.27468	0.15479	0.128794	0.900146	0.141851	0.203239	0.175452	0.0937273	0.0683714	0.18074	0.0975984	0.148483	0.12956
	Fermt2	3.43225	0.114698	0.0768111	0.860377	0.156968	0.0103857	0.855639	0.984508	0.0685883	0.00458413	0.933901	0.995507	1.52043	0.101619	0.239791	0.9351	-0.0289937	-0.052534	0.00374384	-0.00938291	-0.0627013	-0.0217959	-0.0360421	-0.0288785	-0.0294787
	Chac1	3.45052	0.103764	0.0760818	0.860571	2.79303	0.165718	0.0820532	0.657622	0.531692	0.031978	0.594659	0.948589	0.0768176	0.00462011	0.926295	1.00319	-0.0612575	-0.144101	-0.0814439	-0.0261551	-0.00792174	-0.112885	-0.0170384	-0.0768531	-0.0446828
	Acly	3.3501	0.0814914	0.0801909	0.86083	5.02089	0.254291	0.0155111	0.345833	1.13025	0.0549867	0.340242	0.906806	1.22877	0.0597797	0.311158	0.928914	-0.012524	0.00311471	0.0172851	-0.0195895	-0.0474021	0.00989105	-0.0334958	-0.00919836	-0.0150585
	Enpp5	3.48365	0.100057	0.0747797	0.860853	3.59977	0.206784	0.0436382	0.537956	0.283393	0.0162791	0.755816	0.97255	0.283393	0.0162791	0.755816	0.991356	-0.0127614	0	0	-0.0326839	-0.0183616	0	-0.0255228	-0.016342	-0.00918079
	Slco3a1	3.37293	0.123972	0.0804733	0.860862	0.624719	0.0439737	0.54507	0.934195	0.235636	0.0173216	0.792129	0.975537	0.556768	0.040928	0.581288	0.970734	0.107619	0.186012	0.0704613	0.0606178	0.141509	0.11841	0.101064	0.123315	0.0961582
	Lnpep	3.47874	0.0866648	0.0749709	0.860928	0.0249071	0.000796004	0.975427	0.999295	4.04405	0.201497	0.0312634	0.544718	2.76176	0.137606	0.0841459	0.914713	0.013758	-0.0112451	0.0374755	0.0233024	0.00390585	0.0138093	0.0136041	0.00771012	0.0206907
	Cd2	4.14237	0.34115	0.07623	0.861027	NA	NA	NA	NA	NA	NA	NA	NA	NA	NA	NA	NA	0.29261	NA	0.108934	NA	NA	0.203992	NA	NA	0.189885
	H2afv	3.48667	0.0865013	0.0746622	0.861359	2.59828	0.119231	0.0960762	0.671372	1.81681	0.0901469	0.185107	0.817131	2.49545	0.12382	0.104515	0.903255	-0.0352849	-0.0609238	0.0072168	-0.0746039	-0.00552815	-0.0272194	-0.040066	-0.0743513	0.000844329
	Rbm45	3.45244	0.116954	0.0760058	0.861641	1.47015	0.0993795	0.250701	0.818198	0.00328483	0.000222552	0.996721	0.999436	0.060177	0.00407708	0.941746	1.00263	-0.0396177	-0.0292043	-0.0406697	-0.044838	-0.0385906	-0.0348565	-0.0417143	-0.0397737	-0.0396302
	Il10ra	3.49981	0.0715651	0.0741538	0.861644	6.16182	0.247747	0.00719643	0.259848	3.67871	0.150447	0.0410983	0.57358	1.36146	0.0556793	0.276175	0.932958	-0.0241588	0.0227277	-0.0401867	-0.0059709	-0.0715387	-0.0115078	-0.0387548	0.00878684	-0.0558627
	Parp14	3.34723	0.10695	0.0803123	0.861802	0.634571	0.0434023	0.539193	0.931424	0.386979	0.0247294	0.683444	0.963803	1.45339	0.0928769	0.254458	0.92853	-0.0250833	-0.054313	-0.0276682	-0.00927476	-0.0111026	-0.0409232	-0.0101887	-0.0318436	-0.0193854
	Trim47	3.81231	0.228329	0.0767881	0.861815	0.772439	0.0946936	0.485394	0.918323	0.118826	0.0142336	0.889087	0.988667	0.0508591	0.00609217	0.950635	1.0019	0.199721	0.386398	0.258096	0.104854	0.0515738	0.309417	0.0709685	0.245626	0.168032
	Mfsd6	3.34469	0.110378	0.0804194	0.861871	0.0274833	0.00185809	0.972923	0.998499	0.711749	0.0469767	0.501279	0.933277	1.23953	0.0818113	0.308149	0.930201	-0.0904796	-0.14403	-0.0492405	-0.138943	-0.0281102	-0.0972838	-0.0835265	-0.147565	-0.0386754
	Slc25a16	3.32091	0.109422	0.0814329	0.863233	0.483151	0.0318426	0.622957	0.954086	0.244212	0.0160932	0.785327	0.97534	1.28703	0.0848132	0.29524	0.933375	0.0375622	0.0294189	0.0210944	0.0671072	0.0363878	0.0233639	0.0517475	0.046222	0.0287411
	Zfp40	3.35547	0.0935431	0.0812052	0.863636	2.15334	0.120738	0.141037	0.736233	0.538008	0.029997	0.591746	0.949196	3.06635	0.170966	0.0678618	0.91404	-0.105974	-0.327071	0.0361873	0.0226292	-0.181072	-0.119495	-0.0856179	-0.151309	-0.0724425
	Dhtkd1	3.54632	0.214327	0.0822435	0.864085	NA	NA	NA	NA	NA	NA	NA	NA	NA	NA	NA	NA	-0.15567	NA	NA	NA	-0.0708912	NA	-0.157087	NA	-0.126934
	Zfp945	3.32136	0.121255	0.0814134	0.864769	0.212661	0.0155269	0.810002	0.979728	0.292734	0.0213741	0.74896	0.970812	0.0296841	0.00216739	0.970789	1.00261	-0.021002	-0.0226528	-0.0298777	-0.00880126	-0.0228186	-0.026189	-0.0158099	-0.0157615	-0.0263481
	Cep63	3.21642	0.0800685	0.0860636	0.864924	0.147105	0.00800199	0.864009	0.986882	4.22884	0.210543	0.0272906	0.507925	2.60127	0.12951	0.0958417	0.900988	-0.0714718	-0.267122	0.114234	-0.0860156	-0.0672046	-0.067426	-0.0766101	-0.168784	0.0235145
	Ap4b1	3.30305	0.103647	0.0822037	0.865079	0.371555	0.0299671	0.693725	0.973128	1.95485	0.122683	0.164406	0.810237	0.456193	0.0286299	0.639303	0.974162	-0.05598	-0.121571	-0.0350013	-0.112023	0.0354632	-0.076229	-0.03828	-0.116857	0.000230954
	Ggt7	3.2964	0.105201	0.0824926	0.865202	1.02857	0.0645139	0.373385	0.877578	0.557104	0.0355588	0.580404	0.950522	0.933239	0.0595667	0.407667	0.935988	0.0517317	-0.00672805	0.0542853	0.0486539	0.0998733	0.0299643	0.0742636	0.0235516	0.0770793
	Mtx3	3.3137	0.0764452	0.081743	0.865603	4.50279	0.199838	0.0223756	0.40625	0.547261	0.02525	0.585881	0.948687	3.46681	0.159955	0.0483101	0.903226	-0.0464914	-0.00434464	-0.0532772	-0.120761	0.0138316	-0.0337686	-0.0534649	-0.076011	-0.0197228
	Oraov1	3.21788	0.115158	0.085997	0.866047	0.00870538	0.00140791	0.991336	0.999254	0.698824	0.0500178	0.507421	0.932857	0.155045	0.0110972	0.857264	0.996081	0.036327	0.0636932	0.0198625	0.0364681	0.0310196	0.0390942	0.0337438	0.0494078	0.025441
	A430005L14Rik	3.30478	0.106564	0.0821288	0.866078	0.0487632	0.00311619	0.952505	0.995297	0.145994	0.00941532	0.864957	0.984467	2.15891	0.13923	0.138273	0.916826	-0.0743218	-0.106692	-0.0272409	-0.00512554	-0.157497	-0.0675773	-0.0813111	-0.0558512	-0.0923687
	Acpl2	3.30622	0.094276	0.0820661	0.866372	1.07944	0.0615829	0.356384	0.871119	2.23819	0.127642	0.129371	0.763479	1.06407	0.0606835	0.36143	0.935053	0.0732561	-0.0152116	0.0700695	0.151945	0.0741689	0.0336483	0.113057	0.0685872	0.0721192
	Vps54	3.21884	0.103994	0.0859531	0.867005	1.30621	0.0835669	0.290194	0.839385	0.698867	0.0451581	0.507401	0.933101	0.361508	0.0233593	0.700513	0.983983	0.0441529	0.0216419	0.122925	0.00383233	0.0219681	0.0759593	0.0129002	0.0137326	0.0724466
	Kdsr	3.24641	0.102886	0.0847043	0.867238	0.513675	0.0341366	0.604996	0.952843	2.12874	0.134929	0.141836	0.775213	0.0110784	0.000702203	0.988988	1.0035	0.0565112	0.144916	0.0357395	0.0831295	-0.0312378	0.088946	0.0259458	0.112339	0.00225088
	Cdh23	3.36516	0.173699	0.0852531	0.867291	0.00419341	0.0004329	0.995816	0.999447	NA	NA	NA	NA	NA	NA	NA	NA	-0.141136	-0.105512	-0.165188	NA	NA	-0.137774	-0.146513	-0.0140501	-0.26906
	Foxn2	3.20791	0.0944024	0.0864538	0.867845	0.11388	0.0067036	0.892865	0.991854	0.329431	0.019389	0.722671	0.970597	3.44336	0.202662	0.0491893	0.889494	-0.0253877	-0.00856217	-0.0450754	-0.0195888	-0.0214453	-0.0302824	-0.020517	-0.0175336	-0.0332603
	Npr3	3.21951	0.0903837	0.0859225	0.867966	1.22064	0.0838986	0.313452	0.847758	3.01011	0.16901	0.0689939	0.655513	0.469707	0.0263729	0.631052	0.97397	0.00509402	-0.00515748	0.00701209	0.00176255	0.0140929	0.00183492	0.00792773	-0.000982688	0.0105525
	Gm15513	3.20602	0.095423	0.0865407	0.868067	1.79528	0.107456	0.188584	0.782207	0.493436	0.0293729	0.616841	0.955508	1.40729	0.0837723	0.265107	0.929408	0.0828209	0.137248	-0.0703963	0.1243	0.148993	0.0299587	0.136646	0.128886	0.0392981
	Suv39h2	4.58924	0.138186	0.0850747	0.868376	11.8107	0.711261	0.0127554	0.315544	NA	NA	NA	NA	NA	NA	NA	NA	0.140395	NA	NA	NA	NA	-0.078749	0.365443	NA	0.192584
	Lcmt1	3.22224	0.0963987	0.085798	0.868421	0.0242878	0.00158896	0.97603	0.999031	1.24199	0.0743126	0.307465	0.8957	2.33566	0.139751	0.119268	0.889269	-0.0457026	-0.0760714	-0.0238723	-0.0340885	-0.0504014	-0.0491001	-0.042245	-0.0575587	-0.0371369
	Sdhc	3.23484	0.0975114	0.0852258	0.86843	0.554956	0.0281052	0.581595	0.947144	1.75127	0.105581	0.195913	0.821697	1.16333	0.070135	0.330161	0.930099	0.0257207	-0.0165048	0.071408	0.00877533	0.0330368	0.0318492	0.0209061	-0.00270224	0.0522224
	Timp3	3.24709	0.108025	0.0846736	0.868557	0.754894	0.0572993	0.481355	0.918124	1.0327	0.0687118	0.371974	0.904634	0.118271	0.00786929	0.888992	0.996128	-0.00973365	-0.0160363	-0.0087713	-0.0140573	-0.00293782	-0.0115047	-0.00849758	-0.0143058	-0.00585456
	Gm20612	4.26307	0.319464	0.0845027	0.868966	NA	NA	NA	NA	1.54067	0.230909	0.288405	0.882683	NA	NA	NA	NA	-0.262925	NA	-0.442834	NA	NA	-0.304575	NA	0.00693719	-0.442834
	Skiv2l	3.24023	0.0804035	0.0849821	0.869007	2.98112	0.137832	0.0705991	0.620638	2.66932	0.132474	0.0906797	0.712615	1.37926	0.0684501	0.27182	0.936149	-0.0270507	-0.0431042	0.0548595	-0.0856173	-0.0392798	0.0109714	-0.0624486	-0.0643168	0.00778984
	Per1	3.22744	0.100637	0.0855614	0.869048	1.27844	0.0790408	0.297531	0.83994	0.00740183	0.000461604	0.992628	0.998773	1.63546	0.101993	0.216723	0.931601	-0.0452848	-0.0812058	-0.0246026	-0.0204421	-0.0604886	-0.047675	-0.0404654	-0.0484837	-0.0425456
	Susd1	3.32454	0.138058	0.0832358	0.869177	0.378124	0.0314046	0.68994	0.971789	NA	NA	NA	NA	NA	NA	NA	NA	0.13969	NA	0.115791	0.223884	0.0675518	0.160129	0.135226	0.20729	0.0916713
	Lpar1	3.28193	0.103625	0.0831259	0.869825	1.03461	0.0707397	0.37132	0.876945	1.20468	0.0760742	0.31801	0.903346	0.455363	0.0287556	0.639813	0.974127	0.027906	-0.0097664	0.0530817	0.0111937	0.0472987	0.0249464	0.0292462	0.00411939	0.0501902
	Hn1l	3.24713	0.0873523	0.084672	0.870052	2.37285	0.142864	0.115643	0.710767	1.8266	0.0982763	0.183549	0.817617	1.26336	0.0679726	0.301596	0.929771	0.019355	0.000675391	-0.00461824	0.0126865	0.060571	-0.000153803	0.0366288	0.00899028	0.0279764
	F10	3.27922	0.126991	0.0844936	0.870294	0.771652	0.0597658	0.474917	0.914861	NA	NA	NA	NA	NA	NA	NA	NA	0.137948	0.327459	-0.0354968	0.0627361	NA	0.133614	0.112975	0.19069	0.0518879
	Dsn1	3.25518	0.108646	0.0843112	0.870884	0.396395	0.0310622	0.677249	0.970172	1.0012	0.066833	0.382896	0.921807	0.455447	0.0304024	0.639762	0.974206	0.0507393	0.0997152	0.042595	0.0887428	-0.0152022	0.0670841	0.0367703	0.09053	0.0136964
	Bmp5	4.62871	0.480719	0.0840915	0.87113	NA	NA	NA	NA	NA	NA	NA	NA	NA	NA	NA	NA	0.437068	NA	NA	NA	NA	NA	NA	NA	NA
	Pef1	3.19863	0.0903234	0.086882	0.871309	1.11585	0.0631653	0.344735	0.871013	3.42556	0.193463	0.0498679	0.578774	0.0657997	0.00371613	0.936494	1.00332	0.0286181	-0.0106974	0.0485956	0.0133202	0.0655611	0.0185076	0.0394406	0.000251401	0.0570783
	Dctn4	3.25143	0.103909	0.084479	0.871626	0.80039	0.0560124	0.461273	0.913566	1.62971	0.104165	0.217816	0.835573	0.0897231	0.00573474	0.914503	0.999749	0.0261537	0.0658517	0.0267705	0.0403473	-0.0232783	0.045141	0.0085345	0.0519605	0.00174607
	Scand1	3.26098	0.0977644	0.0840527	0.8723	0.65267	0.039298	0.53003	0.930423	0.335646	0.0201254	0.718319	0.970528	2.55895	0.153435	0.0992127	0.898672	-0.0211965	-0.00265202	-0.015471	-0.0163442	-0.0454476	-0.0114429	-0.0308959	-0.0113043	-0.0304593
	Setmar	4.04279	0.366102	0.0842825	0.872396	NA	NA	NA	NA	NA	NA	NA	NA	NA	NA	NA	NA	-0.267598	NA	NA	NA	NA	NA	-0.13154	-0.344913	NA
	Fgd6	3.19135	0.113877	0.0872194	0.87291	0.634795	0.045743	0.539079	0.932271	0.0119717	0.000854374	0.988106	0.998995	0.269815	0.0192557	0.765904	0.99078	-0.0755339	-0.00601846	-0.0567928	-0.131897	-0.0904039	-0.0353741	-0.11115	-0.0773204	-0.0735984
	Hdac4	3.26101	0.0982981	0.0840515	0.873822	1.98929	0.122342	0.159643	0.755959	0.292098	0.0176097	0.749424	0.970953	1.17545	0.0708643	0.326547	0.929989	0.0466922	0.139804	0.0656037	-0.0248474	0.0229045	0.0965927	-0.000971427	0.050554	0.0442541
	Pex11a	3.19217	0.106734	0.0871813	0.874204	0.381688	0.0256808	0.686952	0.972238	0.0591357	0.00395453	0.942722	0.994581	1.41699	0.094757	0.262828	0.930111	0.0274451	0.060944	0.0099834	-0.00247669	0.0425349	0.0346119	0.0200291	0.0283655	0.0262591
	Arl5a	3.26215	0.0770271	0.0840008	0.875	3.26953	0.152484	0.0562739	0.574802	0.274731	0.0129741	0.762235	0.974367	4.49997	0.21251	0.022421	0.942308	0.0381148	0.155218	0.0293561	-0.0688767	0.0457259	0.0900917	-0.0115754	0.0375716	0.037541
	Dnm3os	3.24496	0.13533	0.0884195	0.876364	0.289959	0.0243706	0.751724	0.977729	0.460252	0.0383893	0.638349	0.95407	0.616367	0.0514108	0.550913	0.968135	-0.0953805	-0.140114	-0.0242845	-0.0428925	-0.153708	-0.0908988	-0.0983004	-0.0841219	-0.0991791
	Mir199a-2	3.24496	0.13533	0.0884195	0.876364	0.289959	0.0243706	0.751724	0.977729	0.460252	0.0383893	0.638349	0.95407	0.616367	0.0514108	0.550913	0.968135	-0.0953805	-0.140114	-0.0242845	-0.0428925	-0.153708	-0.0908988	-0.0983004	-0.0841219	-0.0991791
	Mir214	3.24496	0.13533	0.0884195	0.876364	0.289959	0.0243706	0.751724	0.977729	0.460252	0.0383893	0.638349	0.95407	0.616367	0.0514108	0.550913	0.968135	-0.0953805	-0.140114	-0.0242845	-0.0428925	-0.153708	-0.0908988	-0.0983004	-0.0841219	-0.0991791
	Wdr33	3.15051	0.0981692	0.0891408	0.876393	0.265329	0.0179092	0.769269	0.975997	0.872387	0.0543668	0.43133	0.915002	1.83333	0.114253	0.182486	0.923853	-0.0426235	-0.102486	-0.0303673	0.0275984	-0.0794596	-0.0606647	-0.0259306	-0.0314623	-0.0549135
	Slc35d2	4.43536	0.37351	0.0890693	0.876847	NA	NA	NA	NA	1.21973	0.205431	0.370315	0.906213	NA	NA	NA	NA	-0.238609	NA	NA	-0.157669	NA	NA	-0.237584	-0.157669	-0.367409
	Cyp27a1	3.15828	0.112479	0.0887713	0.8771	0.40314	0.0283218	0.672849	0.970584	0.19237	0.0137021	0.826316	0.979114	0.364757	0.0259809	0.698311	0.983068	-0.0332082	-0.0199898	-0.023738	-0.0329958	-0.0526316	-0.023874	-0.0428137	-0.0271586	-0.0381848
	March6	3.16071	0.0949715	0.0886561	0.877228	1.21706	0.0752976	0.314469	0.847338	0.123856	0.00744309	0.884093	0.98685	2.21906	0.133354	0.131461	0.897167	0.0665228	0.168847	-0.0182832	0.00923532	0.126835	0.0689355	0.068035	0.0802544	0.0542757
	St13	3.15309	0.111928	0.0890179	0.877467	0.288947	0.0212824	0.751731	0.977535	0.264754	0.0187964	0.769701	0.975886	0.455153	0.0323138	0.639943	0.973963	0.013576	0.0170316	0.0125	3.0096e-05	0.0247671	0.0144421	0.0123986	0.00827524	0.0186336
	Wscd2	3.17742	0.069347	0.0878694	0.8775	6.96853	0.312711	0.0043058	0.180556	1.90395	0.0831072	0.171731	0.818464	0.948359	0.0413958	0.402009	0.932732	0.0651585	0.126231	0.0476131	0.00158441	0.121989	0.078182	0.0617866	0.0486109	0.0848009
	Mal2	3.3068	0.112742	0.0877624	0.877629	0.142528	0.0100601	0.868252	0.987583	4.60356	0.313907	0.0263496	0.509804	0.265869	0.0181291	0.76986	0.993056	0.117797	0.201055	0.112967	0.225653	-0.0433578	0.115584	0.125895	0.213354	0.0394056
	Herc4	3.1725	0.0987074	0.0881002	0.877741	1.5236	0.103603	0.23912	0.81787	1.25341	0.0779962	0.304313	0.895113	0.206943	0.0128775	0.814563	0.993782	0.057355	0.184016	0.0386827	0.0453226	-0.0168557	0.105814	0.0142334	0.107059	0.0109135
	Trps1	3.17514	0.091039	0.0879762	0.878203	1.80966	0.103365	0.186254	0.778528	0.734112	0.0420976	0.490842	0.935972	1.807	0.103622	0.186683	0.927572	0.0294906	0.0485414	-0.0236679	0.0270873	0.0711956	0.0101454	0.0491415	0.0342824	0.0237639
	Park7	3.13783	0.101501	0.0897471	0.879575	0.318675	0.0252948	0.730271	0.97692	1.84771	0.119537	0.180238	0.815557	0.221858	0.0143531	0.802723	0.994118	-0.0213278	-0.0121549	-0.0276339	-0.00159839	-0.0380536	-0.0222783	-0.019826	-0.00768426	-0.0328437
	Snrpa1	3.13953	0.0988637	0.0896653	0.880196	1.08096	0.0668512	0.355891	0.87208	0.319938	0.0201497	0.729374	0.970194	1.40744	0.0886403	0.265072	0.930345	0.0458025	-0.00350432	0.0675635	0.0996147	0.0121996	0.0375243	0.0559071	0.0507234	0.0398816
	Ddx24	2.96965	0.0903409	0.0982598	0.881426	2.16789	0.132156	0.137233	0.729561	0.224679	0.0136701	0.800505	0.975821	1.05842	0.0643969	0.363308	0.934608	0.0369604	0.0908861	0.0494087	-0.0265447	0.0456057	0.068664	0.00953051	0.0263188	0.0475072
	Gorasp1	2.97178	0.0667913	0.0981465	0.881696	1.99806	0.0971197	0.158454	0.751557	5.56643	0.250213	0.0106754	0.365035	1.69637	0.0762523	0.205494	0.929964	0.0256043	-0.00367206	0.0380391	0.0710515	0.00289957	0.0153313	0.0369755	0.0344447	0.0204693
	1700012B15Rik	2.9802	0.106055	0.0976992	0.882063	0.354767	0.0250854	0.705108	0.972825	0.0426959	0.00303878	0.958278	0.997211	0.662757	0.0471703	0.524997	0.965648	-0.0568099	-0.070488	-0.0334345	-0.0606901	-0.0718513	-0.0484873	-0.0662707	-0.0606508	-0.0526429
	Cdk10	2.99009	0.0647429	0.0971769	0.882406	0.0612457	0.00459093	0.940745	0.992227	6.34916	0.27495	0.00637415	0.294286	3.68659	0.159648	0.0408539	0.911594	-0.0534188	0.0681079	-0.144996	0.0555905	-0.166881	-0.0503096	-0.0556451	0.0542209	-0.155939
	C3ar1	2.9954	0.0876246	0.096898	0.882655	1.24021	0.0753749	0.307961	0.847596	0.145225	0.00849658	0.865614	0.984437	2.70908	0.158498	0.0878044	0.920621	0.0233143	0.0287604	-0.0232694	0.00890406	0.0772451	0.00179635	0.0430746	0.0190724	0.0269878
	Syt11	2.97224	0.107338	0.0981219	0.88301	0.0148176	0.000944749	0.985301	0.998431	0.436745	0.0315447	0.651384	0.957547	0.407587	0.0294387	0.669965	0.976243	0.0503716	0.0871345	0.0154667	0.0463104	0.0633253	0.0457596	0.0548179	0.0638231	0.039396
	Gm23991	2.97484	0.0871492	0.0979836	0.883284	0.0939792	0.00600475	0.910649	0.991667	3.36712	0.197282	0.0521695	0.586728	0.618999	0.0362677	0.547214	0.969606	-0.0252252	-0.0328989	-0.00147457	-0.0460604	-0.0151426	-0.0196888	-0.0306015	-0.0409866	-0.00830857
	Ahcy	2.98026	0.101706	0.097696	0.883383	0.894604	0.0533069	0.422522	0.881664	0.726198	0.0495655	0.494508	0.935954	0.0403508	0.00275408	0.96052	1.00052	0.101248	0.093984	0.196268	-0.00631704	0.120069	0.153074	0.0568759	0.037081	0.158169
	Map4k1	3.10549	0.115833	0.0971188	0.883434	3.85233	0.287378	0.0430815	0.533251	NA	NA	NA	NA	NA	NA	NA	NA	-0.0623145	-0.171756	-0.0743365	NA	NA	-0.123028	0.0875	-0.0749048	-0.0404549
	Mafg	2.98627	0.0853327	0.0973784	0.883784	2.18251	0.128153	0.135556	0.728825	1.67077	0.0954846	0.210134	0.827703	0.651392	0.0372271	0.530671	0.965794	-0.0212405	0.0165165	-0.0339601	-0.0142738	-0.0446548	-0.0107765	-0.0294643	-0.00273803	-0.0393074
	Ggnbp2	3.00713	0.0941634	0.096892	0.883988	0.660785	0.0533029	0.526397	0.930965	2.47048	0.154718	0.107673	0.746458	0.332756	0.0208394	0.720491	0.985204	0.0697263	0.0166189	0.00922975	0.112581	0.112713	0.020674	0.112647	0.0652507	0.0627289
	Abcb1b	2.98132	0.0948146	0.0976397	0.884408	0.579163	0.0412806	0.568331	0.941935	2.0761	0.132052	0.14829	0.788545	0.0759349	0.00482989	0.927108	1.00244	-0.0563711	-0.0448292	-0.068958	-0.0711607	-0.0513655	-0.0535426	-0.0612631	-0.0568263	-0.0601618
	Zfp143	3.12762	0.113898	0.0987496	0.884718	5.16615	0.376268	0.0208744	0.395	NA	NA	NA	NA	NA	NA	NA	NA	-0.188451	NA	-0.36998	NA	NA	-0.240144	-0.288517	-0.0744414	-0.279468
	D6Wsu163e	3.30329	0.178496	0.0906016	0.884853	0.601488	0.0650037	0.56156	0.939057	NA	NA	NA	NA	NA	NA	NA	NA	-0.137277	NA	-0.120803	-0.0821213	-0.0127169	-0.209164	-0.0474191	-0.125994	-0.0794672
	Glns-ps1	3.11481	0.0971595	0.0908602	0.885227	1.55689	0.0973297	0.232203	0.811827	0.0924056	0.00576476	0.912072	0.990612	1.32267	0.0825156	0.285938	0.930191	-0.0710037	-0.0215837	-0.148393	-0.0933328	-0.018504	-0.0919112	-0.0559184	-0.0584663	-0.0834488
	Mansc1	3.16455	0.0647799	0.0904579	0.885318	8.50974	0.398277	0.00211835	0.118293	3.68204	0.150747	0.0435001	0.567021	0.65132	0.0266657	0.532066	0.964927	-0.116341	0.135802	-0.127294	-0.189679	-0.14577	-0.0478291	-0.167724	-0.0937356	-0.116519
	Gm24428	2.99594	0.108069	0.0968695	0.885325	0.401863	0.0287753	0.673679	0.96967	0.0252228	0.00181966	0.97512	0.997889	0.43622	0.0314704	0.651714	0.97507	-0.0553495	-0.0916427	-0.0343466	-0.0369637	-0.0624304	-0.059454	-0.0496971	-0.0626226	-0.0483885
	Gm25122	2.99594	0.108069	0.0968695	0.885325	0.401863	0.0287753	0.673679	0.96967	0.0252228	0.00181966	0.97512	0.997889	0.43622	0.0314704	0.651714	0.97507	-0.0553495	-0.0916427	-0.0343466	-0.0369637	-0.0624304	-0.059454	-0.0496971	-0.0626226	-0.0483885
	Lgalsl	3.10837	0.0664162	0.0911744	0.885437	1.59487	0.0599309	0.224574	0.803079	6.31507	0.269866	0.00651581	0.294393	2.4366	0.104125	0.109704	0.904303	-0.0206803	0.0271064	-0.0280243	-0.0633076	-0.0185672	0.000941445	-0.0409374	-0.0208002	-0.0232958
	Lrrc14	3.11563	0.0866147	0.0908202	0.885854	0.236653	0.0131013	0.791164	0.979398	1.18845	0.066078	0.32272	0.902141	3.50267	0.194749	0.0469987	0.913025	0.0755797	0.125534	-0.00985181	-0.0464869	0.244335	0.0517918	0.0989238	0.0345014	0.117241
	Dlec1	3.08551	0.103924	0.0923003	0.88592	0.223974	0.0156602	0.801059	0.979263	0.0979951	0.00660121	0.90703	0.988726	1.48029	0.0997163	0.248459	0.932325	0.0439003	0.00307379	0.0902569	0.077865	0.00425332	0.0480743	0.0410592	0.0410038	0.0472551
	Folh1	3.06474	0.0669455	0.0933373	0.88594	6.13808	0.255363	0.00730863	0.257037	3.22801	0.141024	0.0581255	0.615632	0.491365	0.0214665	0.618068	0.973499	-0.0247495	-0.059809	-0.0185665	-0.0328387	0.0117519	-0.0366692	-0.0105434	-0.0496584	-0.00340729
	Fbn1	3.02297	0.0953748	0.0954635	0.886	1.73644	0.100869	0.198453	0.792579	0.51559	0.0325337	0.603888	0.950589	0.584349	0.0368724	0.565533	0.968249	0.0168491	0.0067401	0.00304591	0.0380136	0.0190066	0.00345552	0.0285101	0.0237156	0.0110263
	Atg4c	3.01971	0.0911554	0.0956318	0.886043	0.382842	0.0214485	0.686186	0.972373	0.411399	0.0248376	0.667503	0.96179	2.75945	0.166598	0.0843033	0.911442	-0.0506876	-0.0372097	-0.0754966	-0.0761325	-0.0205752	-0.0549366	-0.0483538	-0.0516446	-0.0480359
	Atad2	3.1109	0.108404	0.0910508	0.886062	0.0435863	0.00200905	0.957429	0.996122	1.14282	0.0796467	0.336372	0.904862	0.106775	0.00744147	0.899171	0.997625	-0.0565678	-0.0564802	-0.0426877	-0.0819001	-0.0495528	-0.046776	-0.0657265	-0.0710216	-0.0461203
	Acer2	3.01424	0.103487	0.0959151	0.886544	0.170367	0.0119446	0.84441	0.983566	1.14954	0.0789333	0.334323	0.905253	0.236378	0.0162309	0.791377	0.992787	0.0361014	0.0715307	0.0245703	0.0561735	-0.0042601	0.0465239	0.0259567	0.0626997	0.0101551
	Slc2a4	3.02083	0.0624305	0.0955738	0.886636	2.79175	0.121549	0.082138	0.657534	7.03495	0.290778	0.00413165	0.25443	1.35646	0.0560669	0.277415	0.931686	-0.0199519	-0.0468352	0.0270605	-0.0307044	-0.0235031	-0.0105049	-0.0271038	-0.0406822	0.00177871
	Atp1b3	3.08696	0.0752201	0.0922285	0.886699	6.05362	0.29189	0.00772337	0.262319	0.160598	0.00782658	0.852581	0.982381	1.26183	0.0614941	0.302013	0.929656	-0.0110669	-0.00865493	-0.0046055	-0.0129419	-0.0187195	-0.00744918	-0.0158307	-0.0101418	-0.0116625
	Mtss1	3.11554	0.10211	0.091428	0.886753	0.67353	0.0358075	0.52011	0.928529	1.80471	0.118297	0.188041	0.818901	0.219735	0.0144034	0.804472	0.993825	-0.0573294	-0.0829776	-0.0514181	-0.078863	-0.0224711	-0.0649436	-0.050667	-0.0806264	-0.0369446
	Clec4b1	3.05209	0.120109	0.0952438	0.886883	0.679499	0.0534805	0.51767	0.929645	NA	NA	NA	NA	NA	NA	NA	NA	-0.115802	-0.0650805	-0.0657869	-0.162071	NA	-0.0542337	-0.2135	-0.108226	-0.144521
	Zfp384	3.05588	0.0791753	0.0937838	0.88695	3.769	0.199151	0.0383888	0.53079	0.552203	0.0286143	0.583124	0.949837	1.94903	0.100996	0.165226	0.926796	-0.0439009	-0.0834398	-0.133696	-0.0535455	0.0910105	-0.109219	0.0187325	-0.0685447	-0.0213427
	Gm24523	3.09588	0.105404	0.0917878	0.886957	0.359802	0.0249184	0.701673	0.972727	0.209655	0.014276	0.812397	0.979104	1.06838	0.0727495	0.360008	0.935754	-0.101206	-0.188756	-0.0926854	0.0178097	-0.155028	-0.138488	-0.0686091	-0.0789448	-0.123857
	Tsen54	3.10925	0.123221	0.0948168	0.887132	1.13183	0.0801211	0.344344	0.871668	0.411246	0.0325959	0.668896	0.961897	0.518806	0.0411212	0.603866	0.976281	-0.110323	-0.172573	-0.208854	-0.0734232	-0.000343567	-0.210161	-0.0368834	-0.112261	-0.0984807
	Kif1b	3.01673	0.0718085	0.0957858	0.887136	0.385959	0.0156256	0.684119	0.972671	4.04854	0.192738	0.0311598	0.547872	3.56255	0.169601	0.0448946	0.906087	-0.0128972	-0.0153946	-0.00298622	0.00606213	-0.0358595	-0.0111848	-0.0148987	-0.00452799	-0.0194229
	Psmd5	3.02355	0.0860998	0.0954338	0.887211	0.403463	0.022694	0.672639	0.970667	0.0645412	0.00367581	0.937667	0.99485	4.07861	0.232288	0.0304751	0.919079	0.0248946	0.0439756	0.0271349	0.00684722	0.0181445	0.0382198	0.0124959	0.0269734	0.0226397
	Sp2	3.13773	0.0901656	0.09254	0.88722	4.42438	0.238399	0.0264547	0.45331	0.668761	0.0384349	0.523996	0.933624	1.2378	0.0711387	0.312377	0.930169	-0.108396	-0.213258	-0.33486	-0.0301365	0.129081	-0.280625	0.0441866	-0.100326	-0.122019
	Dctn3	3.0583	0.104478	0.0936616	0.887244	0.0740246	0.00428463	0.928869	0.989526	0.692877	0.0473404	0.510275	0.932761	0.840027	0.0573943	0.444519	0.954571	-0.0384432	-0.0498548	-0.0132829	-0.0249263	-0.0682126	-0.0298239	-0.0465695	-0.0377735	-0.0407477
	Ube3b	2.94706	0.0793359	0.0994734	0.887297	2.22535	0.125168	0.13077	0.728571	2.83645	0.152716	0.0792407	0.684957	0.537982	0.0289653	0.591095	0.973284	-0.0216286	-0.0482824	0.0235717	-0.0462385	-0.0243433	-0.00857859	-0.0352909	-0.0456938	-0.000385761
	Myl1	3.0649	0.110464	0.0933293	0.887342	0.0766098	0.00732904	0.926487	0.989554	0.75376	0.0543334	0.481867	0.933217	0.010044	0.000724001	0.990011	1.00299	-0.0705413	-0.00502142	-0.0969617	-0.0316667	-0.138006	-0.0548801	-0.0848365	-0.0201366	-0.117484
	Fitm2	3.08784	0.102733	0.0921852	0.88748	0.905856	0.0593689	0.418136	0.881753	0.13058	0.00868886	0.878233	0.985984	0.948055	0.0630842	0.402122	0.932586	0.0127258	0.0130977	0.0306383	0.0145514	-0.00789561	0.0228256	0.00332791	0.0139231	0.0113713
	Zmat2	2.7322	0.074865	0.111931	0.887533	0.631696	0.0435933	0.540664	0.932534	3.20624	0.175708	0.0591228	0.616211	1.54349	0.0845862	0.234962	0.935686	-0.0230151	-0.0491462	-0.00853764	-0.0647035	0.0266579	-0.0283251	-0.0190228	-0.0579197	0.00906011
	Cs	3.04671	0.0906188	0.0942481	0.887656	0.730848	0.0394541	0.492351	0.920438	0.984114	0.0585413	0.388966	0.92007	2.07229	0.123273	0.14877	0.93466	-0.0112866	-0.00119318	-0.034895	-0.00412683	-0.00567035	-0.0184039	-0.00489859	-0.00175277	-0.0202827
	Zfp839	2.95172	0.0994293	0.0992218	0.887704	0.333461	0.0267984	0.719846	0.974845	0.671271	0.0452238	0.520789	0.93329	0.862712	0.0581213	0.435228	0.949511	-0.0569531	0.0097605	-0.0825943	-0.0494087	-0.0841983	-0.0446914	-0.0668035	-0.0270141	-0.0833963
	Ppfia4	3.76013	0.429232	0.110197	0.887867	NA	NA	NA	NA	NA	NA	NA	NA	NA	NA	NA	NA	-0.363644	NA	NA	NA	NA	-0.209649	NA	NA	NA
	Gm17509	4.77628	0.544226	0.0941671	0.88795	NA	NA	NA	NA	NA	NA	NA	NA	NA	NA	NA	NA	-0.119687	NA	NA	NA	NA	-0.0577778	NA	-0.179531	NA
	Sesn2	2.99611	0.0889813	0.0968605	0.888012	1.6534	0.0974544	0.213348	0.795567	0.438192	0.0260277	0.650477	0.957409	1.74597	0.103707	0.196816	0.921048	0.0277503	-0.0132586	0.0628971	0.0451006	0.0175738	0.0259125	0.0313372	0.0149614	0.0402354
	Gclc	2.65115	0.082706	0.117098	0.888065	0.853115	0.0526756	0.439133	0.90127	1.03376	0.0644992	0.371611	0.905692	1.31509	0.082052	0.287889	0.932763	-0.0455136	-0.0796697	0.0286316	-0.0303872	-0.104131	-0.0242551	-0.0672589	-0.0510819	-0.0377495
	Mylip	2.76881	0.0571853	0.109685	0.888086	6.88247	0.26486	0.00454341	0.188288	3.67292	0.151716	0.0412792	0.570141	0.769331	0.0317786	0.474881	0.957786	0.019856	-0.00141148	0.0549419	-0.0196616	0.0496427	0.0280939	0.0149905	-0.0153308	0.0522923
	Gm21982	3.02843	0.0944515	0.0951825	0.888099	0.244295	0.014192	0.785263	0.977075	2.04584	0.127613	0.152144	0.786044	0.727311	0.0453672	0.493991	0.961137	-0.0318128	-0.0444181	-0.00866442	-0.0459241	-0.0241065	-0.0292415	-0.0350153	-0.0459891	-0.0163855
	Wibg	3.08925	0.0919627	0.0921149	0.888103	2.68099	0.160353	0.0898256	0.668531	0.298658	0.0177812	0.744647	0.971697	0.771968	0.0459608	0.473709	0.959608	-0.0316263	-0.0473443	-0.0630473	-0.0382132	0.0186051	-0.057372	-0.00980409	-0.041022	-0.0222211
	Ergic1	3.05933	0.0636614	0.0936096	0.88817	6.46024	0.261533	0.0059352	0.229167	2.48454	0.103401	0.105456	0.741909	2.05368	0.0854698	0.151136	0.930479	-0.00993399	0.0121684	-0.0110627	-0.00852235	-0.0291559	-0.00167276	-0.0188391	0.0014822	-0.0201093
	Adrb2	2.70474	0.099915	0.114265	0.88819	0.00733156	0.000549106	0.992698	0.999151	0.890656	0.0658029	0.424674	0.912471	0.284844	0.0210447	0.754863	0.990703	-0.0586	-0.0641709	-0.0490074	-0.00954106	-0.101572	-0.062078	-0.0555567	-0.0347797	-0.0767136
	Pde1a	3.40501	0.25401	0.0947773	0.888199	NA	NA	NA	NA	NA	NA	NA	NA	NA	NA	NA	NA	0.161628	NA	NA	NA	NA	NA	0.245011	NA	0.0653155
	Rad51d	3.09616	0.103634	0.091774	0.888226	0.0325345	0.002198	0.968034	0.997377	0.627391	0.0419996	0.542876	0.938546	1.23	0.0823405	0.310812	0.929977	-0.0536756	-0.11477	0.0125006	-0.0542958	-0.0652275	-0.0474859	-0.0597616	-0.0841988	-0.0263634
	Cxcr7	3.06565	0.0888985	0.0932915	0.888273	0.109485	0.00834619	0.89676	0.992976	1.34187	0.0778238	0.28106	0.880894	2.75824	0.159968	0.084385	0.910502	0.0322651	-0.0105864	0.0779633	0.0722895	-0.0106816	0.0344132	0.030804	0.0328496	0.0336409
	Igfbp7	3.03768	0.0857945	0.0947084	0.888336	0.0783962	0.00318344	0.924844	0.99074	0.725057	0.0409561	0.49504	0.936373	3.88096	0.219223	0.0352953	0.95731	-0.01265	-0.0293709	-0.00077621	0.00702233	-0.0270272	-0.0155406	-0.0100024	-0.010706	-0.0139017
	Naip2	3.02985	0.0957863	0.0951097	0.88839	0.077576	0.00347732	0.925598	0.990692	0.869321	0.0549659	0.432561	0.914531	1.85384	0.117215	0.179289	0.914403	0.0488465	0.0154347	0.0972001	0.0790479	-0.000517617	0.0594273	0.0392652	0.0467991	0.0483412
	Dgka	3.07097	0.0918001	0.0930247	0.888394	1.23549	0.0779153	0.309275	0.84891	1.48085	0.0885337	0.248336	0.849548	0.974576	0.0582657	0.3924	0.946739	-0.0742113	-0.0765542	-0.0195548	-0.193632	-0.0131934	-0.0470924	-0.103412	-0.138705	-0.0163741
	Mgat3	2.71764	0.0691054	0.114126	0.888432	3.52078	0.164685	0.0480153	0.544196	1.53963	0.0783008	0.237712	0.84719	2.74376	0.139539	0.0873715	0.919599	0.0700331	0.181841	0.0999469	-0.0213224	-0.00792825	0.165859	-0.0154657	0.0802591	0.0446475
	Igf2	3.03907	0.233074	0.111888	0.888436	NA	NA	NA	NA	NA	NA	NA	NA	NA	NA	NA	NA	0.194723	NA	NA	NA	0.020222	NA	0.176699	NA	0.0849836
	Rab22a	2.71283	0.0807442	0.113141	0.888586	2.32529	0.128078	0.120301	0.718979	0.746425	0.0444329	0.485197	0.933437	0.870796	0.0518364	0.431969	0.94918	-0.0145798	-0.0127923	-0.00519524	-0.0324645	-0.00781472	-0.00737965	-0.0201396	-0.0238074	-0.00650498
	Psat1	2.94738	0.0850265	0.0994558	0.888609	1.645	0.0956049	0.214922	0.797263	1.03305	0.0596032	0.371853	0.90523	1.68041	0.0969531	0.208374	0.92659	0.0162279	0.0367722	0.0192879	-0.00261478	0.0129023	0.0271961	0.00514378	0.0154374	0.0160951
	Mir5131	2.65692	0.079105	0.117336	0.888708	0.715617	0.0411677	0.499922	0.92084	1.92824	0.11482	0.169194	0.814246	1.82131	0.108452	0.18538	0.928097	-0.0539365	-0.11718	-0.0340149	0.02338	-0.0688614	-0.0866713	-0.0227407	-0.0467122	-0.0514381
	Alox5ap	3.04831	0.0961088	0.0941669	0.888715	2.48744	0.157069	0.105205	0.68315	0.270595	0.0170629	0.765321	0.974217	0.0764715	0.00482207	0.926614	1.00282	0.0276628	0.00402766	0.00497298	0.0496007	0.0529958	0.00416002	0.0512982	0.0270442	0.0289844
	Rbm42	2.77018	0.0867384	0.109601	0.88874	0.14429	0.00789222	0.866414	0.987171	2.49916	0.156504	0.104197	0.738858	0.440069	0.0275584	0.649302	0.975877	-0.0304122	-0.0468298	-0.00947882	-0.0454657	-0.0161219	-0.0306814	-0.0307938	-0.0467023	-0.0128003
	Mrpl1	2.99737	0.084759	0.0967947	0.888754	2.3857	0.137904	0.114418	0.704603	0.197415	0.0111649	0.822227	0.978363	2.0999	0.118761	0.145333	0.93272	0.0601651	-0.0133722	0.11953	0.143162	-0.00787638	0.0573856	0.0676429	0.0660559	0.0558268
	Map10	2.72252	0.0794963	0.112534	0.888773	0.149467	0.0125709	0.861997	0.986722	2.88665	0.168578	0.076118	0.681528	1.22616	0.0716069	0.311892	0.929021	0.0521486	0.135018	-0.0161164	0.0450068	0.0642067	0.0507011	0.0546067	0.0869694	0.0240452
	Myo1f	2.77086	0.0931166	0.110174	0.888919	1.14758	0.0714434	0.335686	0.864193	0.666557	0.0448002	0.52354	0.93286	0.678865	0.0456275	0.517503	0.963769	-0.052576	-0.0439221	-0.103161	0.00843323	-0.0637423	-0.0724089	-0.0271069	-0.0161948	-0.0904578
	Ifltd1	2.71075	0.0699783	0.117021	0.888931	5.13579	0.310037	0.017191	0.378027	2.58794	0.133615	0.102832	0.741986	1.28944	0.0665737	0.299681	0.930615	-0.101641	0.113821	-0.025348	-0.285087	-0.241859	0.0434534	-0.246736	-0.114126	-0.107709
	2610305D13Rik	2.7188	0.0663093	0.112766	0.888932	0.814856	0.035718	0.45508	0.909666	5.56802	0.271599	0.010664	0.366901	1.25864	0.0613945	0.302882	0.931246	-0.0301199	-0.0437109	0.00185551	-0.00447642	-0.0719405	-0.0229765	-0.0382085	-0.0206324	-0.0350425
	Gltscr1l	3.06868	0.0948073	0.0931395	0.889048	2.27922	0.145309	0.125009	0.723201	0.551627	0.0340851	0.583445	0.949422	0.318601	0.0196864	0.730323	0.985317	-0.0452533	-0.0842764	-0.119049	-0.0163846	0.0315179	-0.101183	0.00756667	-0.0485863	-0.0437657
	2210018M11Rik	3.01025	0.244305	0.116763	0.889155	NA	NA	NA	NA	0.155716	0.0252751	0.858059	0.981909	NA	NA	NA	NA	-0.198795	NA	NA	-0.334648	-0.141192	NA	-0.220823	-0.247364	-0.171928
	Mamdc2	2.76309	0.0704748	0.110032	0.889171	4.29706	0.219999	0.0259655	0.448944	2.05078	0.104614	0.151507	0.783819	0.374014	0.019079	0.692075	0.981312	-0.0335545	-0.0643633	0.0064944	-0.0533492	-0.0175636	-0.0274378	-0.0354564	-0.0615305	-0.00553461
	Ankrd42	2.71433	0.0971121	0.113047	0.889221	0.16986	0.0151521	0.844832	0.983831	0.516763	0.0369771	0.60321	0.950705	0.431452	0.0308726	0.654715	0.973677	0.088944	0.0110985	0.0884144	0.0796644	0.151623	0.05936	0.115644	0.0528494	0.120019
	Myl9	2.64406	0.0628673	0.117563	0.889223	7.24132	0.337591	0.00363767	0.161616	0.419515	0.0199495	0.662295	0.961426	0.546024	0.0259654	0.586574	0.973815	0.0198337	0.0478041	0.0102571	0.00380468	0.0170009	0.0267815	0.0104028	0.0272412	0.013629
	Tyro3	4.88444	0.619504	0.114093	0.889318	NA	NA	NA	NA	NA	NA	NA	NA	NA	NA	NA	NA	0.528571	NA	NA	NA	NA	NA	NA	NA	NA
	Ikbke	2.79774	0.0998008	0.111688	0.889328	2.15257	0.166171	0.145146	0.742924	1.13954	0.0812994	0.341993	0.907864	0.325634	0.023232	0.726235	0.983244	-0.160758	-0.23681	0.205516	-0.406986	-0.245606	-0.00807403	-0.326296	-0.287194	-0.0289427
	Polm	3.4694	0.300351	0.111815	0.889342	1.04087	0.18022	0.409203	0.879103	NA	NA	NA	NA	NA	NA	NA	NA	0.31248	NA	NA	NA	NA	0.544803	0.105094	0.478586	0.146374
	Smad3	2.66274	0.0597417	0.116957	0.889421	4.60895	0.215282	0.0212916	0.39924	1.56795	0.0703575	0.230893	0.843493	3.7772	0.169492	0.0388872	0.902525	0.112849	-0.00205749	0.161714	-0.00234284	0.265357	0.0915261	0.131507	-0.00222055	0.213536
	Rem1	2.77875	0.0809559	0.109084	0.889474	2.04182	0.119459	0.152665	0.74906	1.90186	0.110817	0.172039	0.816379	0.329063	0.0191738	0.72293	0.984923	0.0686513	0.0653895	-0.00731367	0.199505	0.0221334	0.0284701	0.110819	0.130724	0.00740986
	Nnt	2.77077	0.0699916	0.109566	0.88953	1.0896	0.056788	0.353091	0.869422	4.43056	0.223838	0.0235704	0.48159	1.38803	0.0701252	0.2697	0.933424	-0.0263076	-0.00382256	-0.0248128	-0.0798119	-0.00328039	-0.0112062	-0.0415461	-0.0425292	-0.0140466
	AU022252	3.03815	0.102184	0.0946844	0.889564	0.104893	0.00703465	0.900849	0.994229	0.170076	0.0114405	0.844652	0.980273	1.5721	0.105751	0.229114	0.934622	0.0410022	0.0379382	0.0234499	0.0649507	0.0328607	0.0330385	0.0489057	0.0549758	0.0281553
	Dhrs7	2.7196	0.0331892	0.112716	0.88957	1.4003	0.0299886	0.266764	0.821519	26.6448	0.650329	1.02688e-06	0	0.0663364	0.0016191	0.935994	1.00369	0.0260395	0.0039397	0.0143001	0.0367169	0.0634278	0.000970024	0.0500724	0.0202621	0.038864
	Smarcal1	2.70714	0.0960506	0.113499	0.889651	0.227191	0.0164045	0.798535	0.979637	0.584648	0.0414871	0.565372	0.945397	0.426872	0.0302912	0.657612	0.974477	-0.113318	-0.116272	-0.128261	-0.00350427	-0.211732	-0.116232	-0.107618	-0.0558766	-0.169996
	Rassf4	2.72585	0.091779	0.112326	0.88966	0.742718	0.0506775	0.486889	0.919419	0.926334	0.0623791	0.41028	0.912485	0.318098	0.0214207	0.730681	0.985452	0.0437973	0.0127709	0.0129789	0.111965	0.0272927	0.0149264	0.0696286	0.0672752	0.0201358
	Rela	2.78792	0.0864757	0.108534	0.889674	1.36459	0.0894306	0.275404	0.826966	0.776351	0.0481618	0.471768	0.928144	1.08475	0.0672939	0.354659	0.940083	-0.0423502	-0.0770576	-0.00711673	-0.0519022	-0.0517807	-0.0350169	-0.0518414	-0.0579965	-0.0294487
	Gngt2	2.86276	0.191713	0.116433	0.88976	NA	NA	NA	NA	0.034871	0.00467048	0.965827	0.997928	NA	NA	NA	NA	-0.370318	NA	NA	-0.434524	NA	NA	-0.509334	-0.406746	-0.3163
	Vldlr	3.04905	0.0833192	0.0941293	0.889796	2.12806	0.113745	0.141917	0.737774	2.27167	0.124152	0.1258	0.757765	0.87317	0.0477209	0.431016	0.950535	-0.0140832	0.001784	0.00292972	-0.0112865	-0.0490646	0.00313075	-0.0301756	-0.00549249	-0.0230675
	Copb1	2.72276	0.0872749	0.112519	0.889804	2.20112	0.140924	0.133453	0.731923	0.231445	0.0148374	0.795212	0.975513	0.304805	0.0195403	0.7402	0.987301	0.0162345	0.0269717	0.029217	0.0152139	-0.00823717	0.0287626	0.00348836	0.022156	0.0104899
	Slc16a13	2.74776	0.123506	0.11381	0.889806	0.250094	0.0224824	0.781251	0.976238	NA	NA	NA	NA	NA	NA	NA	NA	-0.163863	NA	0.000425826	-0.376538	0.0936295	-0.173731	-0.140105	-0.37035	0.0470277
	Pa2g4	3.07102	0.0941192	0.0930223	0.889809	0.624921	0.0353468	0.544149	0.93387	1.06534	0.0653003	0.36101	0.90657	1.58876	0.0973831	0.225784	0.940445	-0.0359754	-0.092512	-0.00277058	-0.00860807	-0.051079	-0.0410071	-0.0298435	-0.0476644	-0.0269248
	Acaa2	2.65669	0.0583289	0.116735	0.889899	8.60548	0.38281	0.00162147	0.101471	0.96794	0.0425031	0.394808	0.920885	0.371608	0.0163176	0.69369	0.983146	-0.010702	-0.00984421	-0.0204549	-0.00865041	-0.00905873	-0.0145529	-0.00885457	-0.00688507	-0.0147568
	Abl2	4.16425	0.454401	0.0967887	0.889954	NA	NA	NA	NA	NA	NA	NA	NA	NA	NA	NA	NA	0.453531	NA	NA	NA	NA	NA	NA	0.557618	NA
	Mthfs	2.72996	0.102045	0.115818	0.889962	3.01125	0.22512	0.0744539	0.631179	NA	NA	NA	NA	NA	NA	NA	NA	-0.13687	-0.113867	-0.0997225	-0.0540576	NA	-0.109111	-0.130976	-0.0946848	-0.228831
	Eif4e2	2.73725	0.0915278	0.111617	0.890106	0.157841	0.0119159	0.854903	0.985641	0.459895	0.0307558	0.637031	0.954698	1.46677	0.0980911	0.251454	0.934209	-0.029111	-0.052513	-0.00208605	-0.0320643	-0.031931	-0.026676	-0.0319977	-0.0427904	-0.0170085
	Dusp3	2.934	0.0891446	0.100183	0.890147	3.16143	0.188797	0.0612345	0.580515	0.0987941	0.00600337	0.906312	0.988739	0.229201	0.0139277	0.796963	0.993751	0.022528	0.0391865	0.0343307	0.00954191	0.0111993	0.0376358	0.0103706	0.0217721	0.022765
	Apold1	3.04011	0.0989252	0.0945843	0.890172	1.93361	0.120182	0.167421	0.767777	0.20026	0.0130329	0.81993	0.978483	0.211792	0.0137834	0.810694	0.993591	0.0265515	0.0101204	-0.00376002	0.0461059	0.0490278	0.00266394	0.0475669	0.0314854	0.0226339
	Me1	2.77121	0.0843705	0.10954	0.890188	3.01856	0.179817	0.0685337	0.608333	0.143721	0.00875129	0.866901	0.984125	0.37496	0.0228316	0.691442	0.980975	0.0119849	0.00584731	0.0199891	0.0162903	0.00644835	0.0138636	0.0113693	0.0103568	0.0132187
	Gm26465	2.79944	0.0931213	0.108459	0.890204	0.305395	0.0196599	0.739906	0.978082	0.471441	0.0313643	0.630263	0.954661	1.85458	0.123382	0.180171	0.917248	-0.0799689	-0.089997	-0.136892	-0.0848225	-0.0106716	-0.116794	-0.047747	-0.0870401	-0.0737816
	Mrpl46	3.07202	0.0990364	0.0929724	0.890271	0.101658	0.00884673	0.903742	0.993854	1.72459	0.111195	0.200507	0.818316	0.647291	0.041735	0.532736	0.964772	-0.0695059	-0.0835312	-0.0775926	-0.0704224	-0.066758	-0.0717177	-0.0685902	-0.0716812	-0.0721753
	Zfand6	2.77487	0.0883198	0.109318	0.890296	0.725707	0.0517564	0.494737	0.919228	1.46742	0.0934116	0.251309	0.852915	0.62865	0.0400179	0.542228	0.968504	0.0328104	0.0283767	-0.0110136	0.0381896	0.0718596	0.00865237	0.0550246	0.0331095	0.030423
	Tmem243	2.74342	0.101872	0.111237	0.890331	0.237252	0.0179334	0.790699	0.979098	0.0149249	0.00110843	0.985195	0.998973	0.341091	0.0253317	0.71453	0.984245	0.027991	0.0101601	0.0258209	0.039877	0.0346948	0.0176014	0.0372859	0.0256222	0.0302579
	Casc5	2.85824	0.117074	0.113039	0.890377	3.77784	0.309483	0.0487487	0.546476	NA	NA	NA	NA	NA	NA	NA	NA	-0.0565539	-0.105007	-0.148171	-0.00852836	NA	-0.121522	0.0438678	-0.0455661	-0.0872645
	Atf1	2.93738	0.0913348	0.0999987	0.890413	2.51957	0.159521	0.102465	0.680803	0.111843	0.00695528	0.894668	0.98694	0.48019	0.029862	0.624731	0.974949	0.0427645	0.0572679	0.0829888	0.032425	0.00524252	0.0718153	0.0188338	0.04194	0.0441157
	Psme4	2.79068	0.0708594	0.108368	0.890463	2.50868	0.123408	0.103385	0.682316	1.0975	0.0557344	0.350553	0.906072	3.19017	0.162006	0.0598709	0.897764	0.0685882	0.113156	-0.0264536	0.117001	0.0478248	0.0475376	0.0824127	0.129136	0.0106856
	Gm15564	2.69799	0.0821688	0.114078	0.890464	2.54424	0.156011	0.100415	0.675731	0.408376	0.0248746	0.669454	0.961569	0.615754	0.0375063	0.548902	0.970427	0.110666	0.146137	0.194364	0.114582	-0.0253447	0.171894	0.0446189	0.13496	0.0845096
	Habp4	2.78226	0.0852709	0.108873	0.890515	1.06704	0.0738715	0.36045	0.872168	1.13755	0.0697271	0.33799	0.905791	1.21854	0.0746919	0.314048	0.927514	-0.0492317	-0.164765	-0.0316164	0.0138622	-0.0378062	-0.0903983	-0.011972	-0.0674418	-0.0347113
	Mcu	2.77889	0.0841181	0.109076	0.890541	0.98475	0.0639398	0.388738	0.880879	1.56322	0.0946388	0.230912	0.843046	1.08035	0.0654054	0.356089	0.93635	0.0641649	-0.111672	0.127985	0.0977345	0.120378	0.0142695	0.109056	0.00165768	0.124182
	AC137938.1	2.6914	0.0680227	0.115785	0.890585	4.95088	0.255641	0.0173172	0.379464	0.190225	0.00961552	0.828182	0.978076	2.79628	0.141347	0.0838151	0.918287	-0.0703799	-0.335252	-0.0943246	0.0961249	-0.0300143	-0.191954	0.0330553	-0.079227	-0.0621695
	Canx	2.79478	0.0764438	0.108123	0.890587	1.17425	0.0590701	0.326903	0.851421	0.480336	0.0262766	0.624643	0.955823	3.72799	0.203939	0.0395944	0.910945	-0.0142645	-0.0382205	-0.0132656	0.0151467	-0.0213029	-0.0266436	-0.00307809	-0.0104427	-0.0172842
	Alg1	2.70735	0.0885966	0.113486	0.890674	0.171493	0.00777901	0.843474	0.983626	2.05525	0.134514	0.150934	0.786842	0.198647	0.0130013	0.821231	0.993028	-0.0242254	0.0115115	-0.0615576	0.00340279	-0.0452792	-0.0282865	-0.0209382	0.00709738	-0.0534184
	Nme3	2.77216	0.0666623	0.109482	0.890713	3.44836	0.163363	0.0490004	0.542576	1.48964	0.0716427	0.246411	0.850098	2.96849	0.142767	0.0713111	0.903774	0.0278556	0.0510223	0.0897752	0.0324741	-0.0602927	0.0719407	-0.0139093	0.0400752	0.0147412
	Gm15347	2.93518	0.0895111	0.100119	0.890722	0.262603	0.0190796	0.771322	0.975285	0.502436	0.0306446	0.611543	0.953003	2.66298	0.16242	0.0911478	0.902725	-0.0313916	-0.0853261	-0.00817182	-0.00807404	-0.0395149	-0.0402519	-0.0237945	-0.0405362	-0.0238434
	Spire1	2.7257	0.123213	0.116083	0.890736	0.122362	0.0113198	0.885558	0.990312	0.0746471	0.00674873	0.928357	0.994485	0.501055	0.0452996	0.614096	0.976746	0.153281	0.18594	0.0641802	0.129893	0.272241	0.111035	0.203288	0.154774	0.162905
	Pik3c2a	2.74786	0.0734673	0.111577	0.890753	2.67789	0.127625	0.0910142	0.66837	3.07696	0.164532	0.0663318	0.647843	0.57248	0.0306118	0.572306	0.970783	0.0496439	0.119291	0.0452885	0.0471306	0.0042774	0.0770038	0.025704	0.0780563	0.024783
	Egr1	2.7063	0.0801682	0.116396	0.890759	1.51012	0.117163	0.246235	0.814973	2.38021	0.141017	0.119549	0.758292	2.13541	0.126514	0.145696	0.931545	0.0723494	0.06225	0.0847268	-0.14149	0.241988	0.0750939	0.0632657	-0.0230202	0.149538
	Eya3	2.72588	0.0646658	0.112324	0.890826	1.58227	0.076932	0.227076	0.808488	0.273921	0.0129964	0.762838	0.973631	6.35755	0.301639	0.00633979	0.873333	-0.0239148	-0.025554	-0.0227554	-0.0152315	-0.0299624	-0.0271	-0.022597	-0.0219646	-0.0263589
	Mettl23	2.66398	0.0857729	0.116261	0.890875	0.504295	0.0338647	0.610455	0.953281	0.910667	0.058642	0.416276	0.913181	1.28231	0.0825737	0.296496	0.933231	0.035024	0.117387	-0.000856949	0.0118658	0.0242043	0.0540466	0.0180351	0.058924	0.0116737
	Isoc1	2.70268	0.0860819	0.113781	0.890956	0.618257	0.0403754	0.5476	0.934601	0.381631	0.0243103	0.68699	0.965918	1.84706	0.11766	0.18034	0.917744	-0.0137638	-0.0251477	-0.0168506	-0.0114426	-0.000906017	-0.0215308	-0.00617431	-0.0193369	-0.0088783
	Gm20634	2.80762	0.0932568	0.107974	0.890984	0.162964	0.0145294	0.850638	0.983851	1.28756	0.0855344	0.295935	0.889506	1.19883	0.0796394	0.320495	0.924703	-0.0502021	-0.113224	-0.0227317	-0.0199478	-0.0514833	-0.0667582	-0.0357155	-0.0660743	-0.040376
	Hist2h2aa1	2.80762	0.0932568	0.107974	0.890984	0.162964	0.0145294	0.850638	0.983851	1.28756	0.0855344	0.295935	0.889506	1.19883	0.0796394	0.320495	0.924703	-0.0502021	-0.113224	-0.0227317	-0.0199478	-0.0514833	-0.0667582	-0.0357155	-0.0660743	-0.040376
	Hist2h3c1	2.80762	0.0932568	0.107974	0.890984	0.162964	0.0145294	0.850638	0.983851	1.28756	0.0855344	0.295935	0.889506	1.19883	0.0796394	0.320495	0.924703	-0.0502021	-0.113224	-0.0227317	-0.0199478	-0.0514833	-0.0667582	-0.0357155	-0.0660743	-0.040376
	Ighj2	3.24563	0.161215	0.0967746	0.891006	2.44331	0.242726	0.128775	0.732597	NA	NA	NA	NA	NA	NA	NA	NA	-0.187975	NA	-0.0500024	NA	NA	-0.0291134	-0.513859	-0.132948	-0.250789
	Bin1	2.81334	0.111489	0.109044	0.891069	0.371759	0.0264244	0.694186	0.973378	0.549552	0.0435561	0.585679	0.948465	0.289132	0.0229159	0.751991	0.989664	0.0619166	0.0646177	0.0149639	0.0594727	0.122914	0.0397908	0.0866617	0.0604304	0.064076
	G2e3	2.64099	0.0812543	0.117765	0.891114	1.37367	0.0843849	0.273179	0.825297	0.228971	0.0140893	0.797143	0.97571	1.82826	0.112499	0.183287	0.924138	0.0264066	0.0520154	0.039862	0.0091081	0.00053793	0.0484375	0.00482301	0.03242	0.0202
	Scly	2.67212	0.0863176	0.115734	0.89121	1.67373	0.107765	0.209591	0.794057	0.0511257	0.00330303	0.950267	0.996346	0.917505	0.0592764	0.413647	0.937167	0.0562817	-0.0102225	-0.0119851	0.0969664	0.134921	-0.00837677	0.115944	0.0514488	0.0614679
	Ascc1	2.74396	0.0804198	0.111203	0.891247	1.52539	0.0914354	0.238743	0.818271	0.200647	0.0117611	0.819618	0.978473	2.4622	0.144324	0.107412	0.899651	-0.0396563	-0.0950226	-0.0104331	0.0336852	-0.0859536	-0.0513899	-0.0261342	-0.029798	-0.0481934
	Pigp	3.00038	0.0838571	0.0966371	0.891298	2.06203	0.116928	0.150069	0.744828	2.13971	0.119605	0.140529	0.77152	0.687883	0.0384511	0.512684	0.963152	0.0197674	0.0101267	0.00487814	0.0236302	0.043106	0.00650067	0.0333681	0.0168417	0.0239921
	Yipf5	2.78302	0.102441	0.108827	0.891316	0.106947	0.0074997	0.899018	0.993672	0.565611	0.0416397	0.575716	0.948696	0.0193959	0.0014279	0.980807	1.0028	0.0304807	0.0126639	0.0365462	0.0193825	0.050459	0.0262242	0.0349207	0.0155849	0.0435026
	Zfp592	2.74792	0.101063	0.11096	0.891356	0.0663895	0.00421218	0.935945	0.99121	0.644296	0.0473919	0.534248	0.935821	0.0104109	0.000765785	0.989648	1.00342	0.0733153	0.0923661	0.0643133	0.0943098	0.0406967	0.0805607	0.0675033	0.0924018	0.052505
	Ywhaz	2.92937	0.0672333	0.100436	0.891483	6.13957	0.281877	0.00730154	0.258955	0.89575	0.0411176	0.422073	0.914007	1.7851	0.0819414	0.190252	0.926569	0.0194604	-0.0378808	0.0235856	0.0525194	0.0360042	-0.00494606	0.0442618	0.00916033	0.0297949
	Ptch1	2.72812	0.112912	0.115026	0.891677	0.0137376	0.0012446	0.986366	0.998589	0.40382	0.0334268	0.673362	0.963441	0.799104	0.0661471	0.464279	0.954973	0.158955	0.317746	0.108845	0.0630357	0.204547	0.169949	0.147854	0.192121	0.156696
	Alpl	3.2578	0.26238	0.10457	0.89169	NA	NA	NA	NA	0.0792891	0.0127717	0.924411	0.993302	NA	NA	NA	NA	-0.188785	NA	NA	-0.250625	-0.223023	NA	-0.230735	-0.250625	-0.161403
	Ubl3	2.63787	0.0808326	0.117971	0.89175	0.0784523	0.00734698	0.924793	0.990904	1.90283	0.116617	0.171896	0.818066	1.51663	0.0929488	0.240598	0.935835	0.0167731	0.0265225	0.0011421	0.00321009	0.0328598	0.0151566	0.018035	0.0151539	0.017001
	Abracl	2.73818	0.0855694	0.11156	0.891799	1.12424	0.0615303	0.34211	0.869774	1.56187	0.0976185	0.231186	0.841164	0.444557	0.0277852	0.646502	0.975405	0.0286079	0.000887023	0.0132888	0.0635274	0.037279	0.00442462	0.0504032	0.0343505	0.0252839
	Pou5f2	5.22791	0.635387	0.106302	0.891806	NA	NA	NA	NA	NA	NA	NA	NA	NA	NA	NA	NA	0.63748	NA	NA	NA	NA	NA	0.541326	NA	NA
	Gstm2	2.67991	0.0672707	0.115232	0.891816	1.05298	0.0372411	0.365122	0.872739	5.85691	0.294038	0.0087921	0.325954	0.169046	0.00848674	0.845509	0.99708	-0.0141212	-0.00859038	-0.0296051	0.0122199	-0.0279583	-0.0215445	-0.00786922	0.00336162	-0.0287817
	Ssh2	2.85827	0.0809752	0.104415	0.891819	2.08093	0.116686	0.147685	0.744783	0.580147	0.0328713	0.567799	0.944767	2.05884	0.116654	0.150476	0.929798	-0.0255923	-0.0298248	-0.078806	0.00839679	-5.01255e-06	-0.0575914	0.00419589	-0.0114114	-0.0394055
	Pcyt2	2.82843	0.0729335	0.106139	0.891933	2.07846	0.093356	0.147994	0.744475	1.99871	0.103077	0.158367	0.797563	2.39909	0.123725	0.113157	0.898839	-0.0343539	0.00497909	-0.114384	-0.00242139	-0.0273672	-0.0576733	-0.0148943	0.00617677	-0.0708754
	H2-Ke6	2.81986	0.0863607	0.10664	0.891967	2.99089	0.182062	0.0700537	0.62027	0.0646371	0.00395914	0.937577	0.995146	0.360583	0.0220864	0.701141	0.984416	0.0192052	0.00121503	-0.0150371	0.0460649	0.0444385	-0.00811518	0.0452517	0.0240021	0.0147007
	Ankrd50	2.68429	0.073806	0.114952	0.892051	2.55169	0.134529	0.0998041	0.674457	1.73414	0.0953621	0.19885	0.818711	1.05679	0.0581139	0.36385	0.934355	-0.0155539	-0.00349753	0.0123444	-0.0585835	-0.0103283	0.00526162	-0.0344559	-0.0328305	0.0010081
	Tnfrsf21	2.67371	0.0776141	0.115632	0.892092	1.16905	0.0681347	0.32845	0.851779	1.84008	0.10683	0.181428	0.817197	1.37843	0.0800276	0.272021	0.934501	-0.0258672	-0.0195256	0.00114128	-0.00486593	-0.0798504	-0.00942355	-0.0423582	-0.00959147	-0.0393546
	Col12a1	2.84912	0.0824181	0.10494	0.892135	1.35344	0.0828014	0.278166	0.825331	0.330719	0.0191337	0.721767	0.971617	2.67587	0.154813	0.0901993	0.899578	-0.0520349	-0.0870429	0.022218	-0.00634624	-0.138616	-0.0269952	-0.0724812	-0.0439969	-0.0581991
	Emilin2	2.63279	0.0721814	0.118307	0.892135	0.989142	0.0617189	0.387169	0.880378	3.0327	0.166291	0.0677705	0.651544	1.39906	0.076714	0.26706	0.929754	0.0370324	0.00419719	0.0763731	0.0778112	-0.00332502	0.0390234	0.0372431	0.0413682	0.036524
	Myo6	2.74949	0.0907125	0.110863	0.892144	0.0668785	0.00482851	0.93549	0.991422	0.426903	0.0281692	0.657592	0.958739	1.78644	0.117878	0.190031	0.929331	-0.0269143	-0.0597895	-0.00175538	-0.0195795	-0.0271169	-0.0310475	-0.0233482	-0.0397401	-0.0144361
	Klhdc4	2.74414	0.0915215	0.111193	0.892297	0.528075	0.0317395	0.596719	0.953933	1.36006	0.0907208	0.276522	0.880813	0.231543	0.0154447	0.795135	0.992842	0.0276874	0.00848026	0.0575912	-0.00676098	0.050422	0.0350581	0.0218305	3.45201e-05	0.0540066
	Rbmxl1	2.82174	0.103069	0.10653	0.89251	0.22079	0.0155858	0.803565	0.978142	0.247704	0.0180957	0.782647	0.976462	0.309215	0.0225893	0.737027	0.986829	-0.0694396	0.00244069	-0.103668	-0.0768858	-0.0884359	-0.0569517	-0.0826609	-0.0402519	-0.0960518
	Ppp1r14a	2.99714	0.173701	0.107059	0.892541	0.628721	0.0728758	0.548733	0.935123	NA	NA	NA	NA	NA	NA	NA	NA	-0.100959	NA	-0.091079	NA	-0.216088	-0.0609304	-0.151019	0.00438412	-0.148433
	Gas6	2.81115	0.0723347	0.107153	0.892552	0.349557	0.0248918	0.708681	0.97367	3.81882	0.196527	0.0369773	0.573438	2.35758	0.121327	0.117118	0.898237	0.0139729	0.0114533	0.0201183	0.0295028	-0.003842	0.0156684	0.0128304	0.0217156	0.00813817
	Per3	2.8498	0.0826898	0.104901	0.892827	1.48309	0.0874841	0.247842	0.814522	1.89735	0.110107	0.172707	0.814376	0.926508	0.0537672	0.410214	0.936824	0.0548776	0.0623983	0.167774	-0.0151081	0.0169009	0.112276	0.000896352	0.0182575	0.0923376
	2410002F23Rik	2.67549	0.0816131	0.115517	0.892848	0.0384547	0.00242431	0.962337	0.997328	2.88567	0.176049	0.0761782	0.679823	0.629412	0.0383992	0.541836	0.968126	-0.022743	-0.0358069	-0.000407532	-0.037111	-0.0137475	-0.0200561	-0.0254293	-0.0374724	-0.00707754
	Ncl	2.91347	0.0864985	0.10131	0.892868	2.015	0.122051	0.156186	0.75092	0.155349	0.00922436	0.857007	0.98189	1.7141	0.10178	0.202345	0.927839	-0.0206973	-0.0049733	0.0153604	-0.0290166	-0.0591953	0.00414581	-0.044106	-0.0190013	-0.0219175
	Gm22643	2.89414	0.116214	0.104399	0.892938	0.120098	0.00656812	0.887468	0.991125	0.321015	0.0257808	0.729081	0.970688	0.563552	0.0452589	0.577963	0.97174	-0.128571	-0.194859	-0.129855	-0.0609663	-0.133065	-0.167847	-0.094643	-0.119414	-0.135888
	Maml2	2.89414	0.116214	0.104399	0.892938	0.120098	0.00656812	0.887468	0.991125	0.321015	0.0257808	0.729081	0.970688	0.563552	0.0452589	0.577963	0.97174	-0.128571	-0.194859	-0.129855	-0.0609663	-0.133065	-0.167847	-0.094643	-0.119414	-0.135888
	Snx4	2.8152	0.103634	0.106914	0.892946	0.398874	0.0305024	0.675628	0.969734	0.208475	0.0153488	0.813339	0.979476	0.0675017	0.00496978	0.934911	1.0037	0.0875117	0.0487523	0.026085	0.124814	0.139525	0.0402008	0.13217	0.0903305	0.0828052
	1700049G17Rik	2.92497	0.0828605	0.100677	0.892962	1.07857	0.0626077	0.356669	0.871228	0.982319	0.0556555	0.389609	0.91947	2.62662	0.148817	0.0938825	0.896378	0.0904152	0.227736	-0.0999556	0.106223	0.142888	0.0586958	0.124555	0.163004	0.021466
	Gm16206	2.88578	0.115406	0.10759	0.892995	0.645063	0.0467414	0.536999	0.933217	0.73744	0.0589823	0.493028	0.934966	1.17734	0.0941663	0.331999	0.930685	0.11339	0.0321897	0.213324	0.246081	0.029019	0.083928	0.139297	0.135004	0.097282
	Rrm2b	2.80047	0.0695213	0.107785	0.893004	0.791781	0.0392312	0.465002	0.913901	1.24212	0.0616707	0.307431	0.896078	5.20696	0.258524	0.0136365	0.934375	-0.0243489	-0.0730587	0.000507239	0.0123475	-0.0344768	-0.0377134	-0.0110646	-0.0307262	-0.0169848
	Nubpl	3.0532	0.142714	0.106095	0.893036	3.1703	0.296376	0.0784522	0.643838	NA	NA	NA	NA	NA	NA	NA	NA	0.056553	NA	NA	0.0243463	-0.0305417	0.165459	-0.00879007	0.0891393	0.0286859
	Med21	2.8059	0.0640445	0.107463	0.893122	5.05626	0.220654	0.0151342	0.341038	2.17789	0.0994202	0.136084	0.764215	1.76877	0.080744	0.192963	0.93163	0.0299279	-0.00306498	0.12059	-0.00486992	0.0131425	0.0609623	0.00413628	-0.00896402	0.0668664
	Gbp5	2.62631	0.0985951	0.118736	0.893151	0.00146456	0.000469148	0.998537	0.99919	0.487668	0.0366154	0.620263	0.95569	0.0163861	0.00123031	0.983759	1.00287	-0.0950644	-0.148234	-0.0621952	-0.114575	-0.0694248	-0.0983266	-0.0919999	-0.129725	-0.06581
	AC161602.1	2.62199	0.078896	0.119024	0.893416	0.57062	0.0302881	0.572974	0.943086	2.46197	0.148162	0.107433	0.747404	0.77317	0.0465295	0.473176	0.960513	0.035521	0.0580127	0.00555251	0.102674	-0.028331	0.032143	0.0371714	0.0850414	-0.0113893
	Pid1	2.63698	0.0658955	0.118644	0.893516	5.06706	0.26227	0.0154888	0.345581	2.00998	0.100455	0.157861	0.797165	0.613285	0.0306507	0.550571	0.968972	0.0475797	0.0184194	-0.000882905	0.154396	0.047126	0.0064573	0.0995128	0.0870742	0.0137595
	Gm16263	2.83947	0.0903071	0.105497	0.893697	0.417738	0.0223291	0.663431	0.96647	1.53947	0.0979229	0.235797	0.846553	0.844261	0.0537021	0.442768	0.955556	0.0439772	0.104108	-0.0506823	0.0841765	0.0496661	0.0192772	0.0669213	0.0921184	-0.000508061
	Chi3l1	3.02637	0.158042	0.101118	0.893723	0.061412	0.00641405	0.940656	0.992334	NA	NA	NA	NA	NA	NA	NA	NA	0.116556	0.168858	0.105769	0.136978	NA	0.10498	0.136978	0.150641	0.105769
	Gdf5	2.91038	0.144198	0.107344	0.893802	0.636444	0.0630665	0.542051	0.934036	NA	NA	NA	NA	NA	NA	NA	NA	-0.0754125	0	-0.186769	0	NA	-0.112061	-0.0448718	0	-0.165908
	Myzap	2.83687	0.0537172	0.105648	0.893846	9.19131	0.348652	0.00116537	0.0965517	4.06805	0.15406	0.0307137	0.548014	0.227802	0.00862702	0.798057	0.993124	-0.0814682	-0.31553	-0.0886905	-0.0793018	0.1109	-0.197966	0.015799	-0.173589	0.0111047
	Llgl1	3.01908	0.273987	0.120492	0.89385	NA	NA	NA	NA	NA	NA	NA	NA	NA	NA	NA	NA	0.389367	NA	NA	NA	0.346244	NA	0.467313	NA	0.273196
	Ngfr	3.56836	0.337645	0.100822	0.893851	NA	NA	NA	NA	NA	NA	NA	NA	NA	NA	NA	NA	0.162688	NA	NA	0.187369	NA	NA	0.162688	0.187369	NA
	Steap2	2.93838	0.146173	0.1058	0.893855	0.581822	0.0578869	0.570274	0.942778	NA	NA	NA	NA	NA	NA	NA	NA	0.112812	NA	0.228405	NA	0.0309288	0.200254	0.0575661	0.0854931	0.0959379
	Itpripl1	2.831	0.103716	0.105989	0.893863	0.233877	0.0178443	0.793318	0.98005	0.0368711	0.00270159	0.963857	0.99773	0.461644	0.0338253	0.63596	0.973828	-0.0494843	0.00107853	-0.0577631	-0.0816062	-0.054119	-0.029383	-0.0678626	-0.0424729	-0.0559411
	Zfp939	2.92493	0.109393	0.101289	0.893878	0.9065	0.0678063	0.418499	0.881451	NA	NA	NA	NA	NA	NA	NA	NA	0.111743	NA	0.109737	0.218515	0.133303	0.0202068	0.177572	0.0960998	0.12152
	Xrcc4	2.62797	0.103042	0.119242	0.893921	0.438025	0.0343494	0.650816	0.963673	NA	NA	NA	NA	NA	NA	NA	NA	0.201696	-0.255101	NA	0.302553	0.288827	0.0692769	0.297836	0.0449296	0.412493
	Isy1	2.91873	0.0842326	0.10102	0.894006	1.31176	0.0716683	0.288751	0.837102	0.550413	0.0317691	0.584121	0.948402	2.50388	0.144521	0.103793	0.898367	0.0499189	-0.0145977	0.112129	0.0405705	0.050477	0.0578697	0.0455237	0.0161929	0.0813027
	Cd59b	2.69642	0.124713	0.118942	0.89403	0.962265	0.0890123	0.401886	0.877947	NA	NA	NA	NA	NA	NA	NA	NA	0.184855	0.0562963	-0.00975178	NA	0.368093	0.0232723	0.271169	0.160598	0.242145
	Arcn1	2.86269	0.086432	0.104162	0.894043	1.46145	0.0829433	0.252644	0.81474	0.485175	0.0292974	0.621749	0.955368	1.6824	0.101592	0.208013	0.927015	-0.0134395	-0.0333588	0.00571052	-0.00656579	-0.0204291	-0.0124399	-0.0134975	-0.0203344	-0.00735931
	Gabrr2	2.93037	0.0859972	0.102392	0.894092	3.56592	0.245001	0.0473705	0.551945	1.01704	0.0596938	0.379622	0.92043	0.989453	0.0580747	0.389259	0.944376	-0.0445237	0.0175381	0.0251211	-0.0681902	-0.210453	0.0200541	-0.119169	-0.0290341	-0.0626053
	Wdr46	2.89949	0.0867447	0.102086	0.894356	0.431557	0.0235517	0.654649	0.963772	0.404616	0.02421	0.67189	0.962884	2.92685	0.175127	0.0737144	0.908616	-0.0230146	-0.0522742	0.02393	-0.00861465	-0.0616929	-0.0100116	-0.0351538	-0.0282597	-0.0188814
	Gimap4	2.86342	0.100449	0.105401	0.89439	0.487819	0.0416928	0.620751	0.954193	1.69082	0.118628	0.208518	0.827576	0.142734	0.0100143	0.867818	0.996607	0.132978	0.201992	0.217288	0.176003	0.0267844	0.177885	0.101394	0.194275	0.0950395
	Zdhhc24	2.8592	0.0616712	0.104361	0.894618	3.69512	0.158971	0.0405909	0.53039	0.778987	0.0336046	0.470604	0.926988	5.77728	0.249225	0.00926953	0.7875	-0.075568	0.107458	-0.0894008	-0.13421	-0.157547	-0.00712982	-0.145878	-0.0261831	-0.123474
	Bag3	2.58233	0.0765555	0.121706	0.894634	0.987482	0.0687345	0.387761	0.881102	1.58719	0.0941073	0.226096	0.841997	1.49987	0.0889304	0.244188	0.932782	-0.07881	-0.266809	-0.0377765	-0.0343202	-0.00412803	-0.144639	-0.0192241	-0.144582	-0.0209523
	Esco1	2.86997	0.0811427	0.103747	0.894729	0.272858	0.017036	0.763631	0.975141	3.98632	0.22541	0.0326302	0.55102	0.490572	0.0277398	0.618538	0.973655	0.0335385	0.120888	-0.0167224	0.0577956	-0.0124512	0.0445078	0.0226722	0.0867113	-0.0145868
	Ewsr1	3.27165	0.352866	0.12048	0.894828	NA	NA	NA	NA	NA	NA	NA	NA	NA	NA	NA	NA	-0.276667	NA	NA	NA	NA	NA	NA	NA	-0.38
	Cln3	2.90235	0.0976694	0.10394	0.894879	1.09969	0.078407	0.352282	0.870434	0.799245	0.0537921	0.463517	0.923551	1.50792	0.101488	0.24549	0.934757	-0.175952	0.132055	-0.193346	-0.35484	-0.368444	-0.0306456	-0.324602	-0.0841919	-0.280895
	Ankrd26	2.6104	0.0867819	0.12109	0.894975	0.0203226	0.00229963	0.979902	0.996482	2.88918	0.1921	0.0779059	0.681597	0.325314	0.0216299	0.725876	0.983487	0.093032	0.109313	0.0604496	0.148248	0.078198	0.0813909	0.104105	0.133898	0.0693238
	Pabpc1	2.60158	0.05032	0.120396	0.895068	6.23139	0.260524	0.00687834	0.257143	3.3653	0.130184	0.0522429	0.586073	3.45286	0.133571	0.048831	0.88937	0.0103234	-0.00600383	-0.00669087	0.0205488	0.0293006	-0.00644561	0.0249247	0.00821931	0.0113049
	Idua	3.47736	0.285173	0.121226	0.895104	1.85825	0.304785	0.249212	0.816343	NA	NA	NA	NA	NA	NA	NA	NA	-0.268047	NA	NA	NA	NA	-0.523378	0.0281593	-0.569005	-0.00954788
	Ncf2	2.86357	0.0731851	0.104112	0.89517	3.04434	0.155701	0.0671498	0.60431	2.94698	0.150634	0.0725421	0.669301	0.640779	0.0327532	0.536031	0.965578	0.0368857	-0.00680454	0.0207586	0.0119706	0.125012	0.0060501	0.0684913	0.000999122	0.0728853
	Dcaf7	2.90061	0.095933	0.102023	0.895217	0.819988	0.0574345	0.452905	0.908289	0.437839	0.0289617	0.650698	0.957135	0.909771	0.0601784	0.416621	0.936627	-0.0576758	-0.0410021	0.0104073	-0.0363898	-0.161546	-0.0140622	-0.098968	-0.0369271	-0.0755694
	Bcl2l13	2.8943	0.0910936	0.102376	0.895238	0.356484	0.022308	0.703934	0.973131	0.148982	0.00937795	0.862409	0.982851	2.43382	0.153201	0.109956	0.903259	0.019754	0.0429787	0.0150595	0.0127045	0.0143633	0.0258921	0.0135339	0.0253985	0.0147114
	Rpl35a	2.61419	0.0799452	0.119546	0.895291	0.411628	0.0183249	0.667356	0.96977	2.90474	0.177661	0.0750263	0.682162	0.22646	0.0138508	0.799108	0.99285	-0.0119539	-0.013172	-0.0137576	-0.000749741	-0.0191624	-0.0145301	-0.00995605	-0.00592504	-0.01646
	Gm10138	3.85718	0.490912	0.121002	0.895337	NA	NA	NA	NA	NA	NA	NA	NA	NA	NA	NA	NA	0.12304	NA	NA	NA	NA	NA	0.0630828	NA	0.152213
	Med19	3.24287	0.169369	0.10192	0.895501	2.95198	0.308352	0.0982821	0.674256	NA	NA	NA	NA	NA	NA	NA	NA	0.229609	NA	0.506988	NA	0.0966582	0.523177	0.0396259	0.129789	0.301823
	Psen1	2.89619	0.098647	0.10227	0.895665	0.460223	0.0332651	0.63683	0.95861	0.100613	0.00685393	0.904679	0.988498	1.17065	0.0797467	0.327974	0.931333	0.0497123	0.116726	0.0221614	0.00960018	0.0600625	0.0672368	0.0348313	0.0593673	0.041112
	Dhrs9	2.60351	0.0617949	0.120265	0.895679	3.29397	0.160232	0.0552142	0.577079	4.57469	0.217162	0.0212512	0.470536	0.395364	0.018768	0.677925	0.975393	0.0578994	-0.0290725	0.0576276	0.124722	0.0895168	0.0105851	0.10712	0.0484881	0.0735722
	Mettl7b	2.58317	0.0511857	0.121648	0.895726	2.27738	0.0697538	0.125201	0.722615	8.96117	0.355133	0.00132533	0.147727	1.20315	0.0476811	0.318451	0.928253	0.0163276	0.00240269	0.0109209	0.0538778	-0.000465445	0.00393249	0.0267062	0.0311423	0.00522775
	Fam84b	2.55773	0.0770067	0.123404	0.895793	2.43387	0.139449	0.109951	0.696441	1.0738	0.0646585	0.358229	0.908377	0.320661	0.0193085	0.728862	0.984889	0.0511178	0.0973307	0.0434832	0.0812591	-0.0130487	0.0645885	0.0341052	0.0917393	0.0152173
	Sos2	2.55012	0.0794738	0.123935	0.895818	1.30924	0.0852576	0.289406	0.837988	1.20401	0.0750453	0.318204	0.90228	0.755478	0.0470885	0.481091	0.958584	-0.0534781	0.0307083	-0.126243	-0.0218401	-0.0751657	-0.0550717	-0.0485029	-0.00393354	-0.100704
	Mob3c	2.70323	0.0888686	0.120935	0.895823	3.48718	0.221778	0.0570575	0.575787	2.7421	0.180293	0.0966147	0.732396	0.128232	0.00843129	0.880603	0.994504	-0.203683	0.397183	-0.0290551	-0.175198	-0.676789	0.159777	-0.476107	0.070114	-0.403311
	Myrf	2.88764	0.0847064	0.10336	0.895994	1.23233	0.0763528	0.310969	0.849614	0.892165	0.0523418	0.424082	0.913981	2.47666	0.145301	0.107131	0.9	0.0503505	0.00157996	0.155093	0.0690584	-0.0365215	0.0893014	0.0162685	0.0401391	0.0592855
	Klhl17	2.87012	0.0930519	0.103739	0.896006	0.53061	0.0263682	0.595275	0.953389	1.76955	0.114741	0.192832	0.825266	0.186944	0.0121218	0.830738	0.995666	0.088352	0.0894089	0.0375	0.188251	0.0407317	0.0572041	0.114491	0.147046	0.0391158
	Ethe1	2.55898	0.0761167	0.123317	0.896029	1.14193	0.071297	0.336644	0.8652	1.34566	0.080053	0.28011	0.881936	1.54249	0.0917627	0.235168	0.934926	-0.0549855	-0.12325	-0.0286945	0.0357293	-0.102308	-0.0749427	-0.0332896	-0.0400081	-0.0655015
	Mettl14	2.58439	0.077075	0.121565	0.89621	1.98296	0.118086	0.160507	0.758362	1.73937	0.103748	0.197948	0.822187	0.250887	0.0149646	0.780212	0.996899	0.0238542	0.0267182	0.0605788	-0.0349008	0.039866	0.0453449	0.0024826	-0.00467161	0.0502224
	Tmem19	2.56081	0.0800631	0.12319	0.896506	2.16736	0.13718	0.137294	0.729435	0.0710398	0.00444209	0.931628	0.995237	0.973638	0.0608811	0.392739	0.945855	-0.0214526	-0.0203459	-0.0109136	-0.02803	-0.0278979	-0.0163624	-0.0279639	-0.0238751	-0.0194058
	Ptgs2	2.91411	0.0509703	0.101885	0.896512	2.02687	0.0828517	0.155625	0.753575	5.28163	0.184761	0.0133857	0.41519	8.82081	0.308567	0.0015381	0.469231	-0.0609314	-0.323431	0.00415848	-0.0332782	0.0431999	-0.136237	0.00496084	-0.157629	0.0236792
	Dhcr24	2.87285	0.0957804	0.103584	0.896571	0.717352	0.0412343	0.498642	0.920514	0.930685	0.0620577	0.408632	0.910915	0.412617	0.0275131	0.666719	0.9762	-0.039855	-0.0381385	-0.0139161	-0.0984269	-0.00503404	-0.0254103	-0.0517305	-0.0731813	-0.00947508
	Chst14	2.55065	0.0671877	0.123898	0.896651	3.0158	0.15909	0.0686839	0.609168	2.33701	0.12312	0.119135	0.760848	0.853373	0.0449581	0.439027	0.952188	0.0455585	0.149078	0.0265378	0.0156723	-0.0124203	0.0888382	0.001626	0.0834658	0.00705875
	Dnajb12	2.55442	0.0630479	0.123635	0.896759	5.60919	0.260093	0.0103726	0.292683	1.53941	0.0759909	0.235809	0.846112	0.331964	0.016387	0.720894	0.985035	0.0446869	0.0536439	0.167217	-0.0553612	0.0255326	0.113267	-0.0149143	-0.0111946	0.0963746
	Ino80c	2.60379	0.0900346	0.120246	0.896786	0.40552	0.0284153	0.671304	0.97123	0.132346	0.00915256	0.876701	0.986087	1.12019	0.0774684	0.343374	0.93603	0.0390363	0.0828551	-0.0173945	0.0270933	0.0722101	0.0289883	0.0496517	0.0513274	0.0274078
	Mir546	2.57696	0.0805597	0.122074	0.896833	0.275537	0.0150378	0.761635	0.975342	1.88315	0.11774	0.174825	0.816562	1.04693	0.065457	0.367152	0.933881	0.010712	0.00847977	0.0029261	0.0374155	-0.00642024	0.0056129	0.0154976	0.0238777	-0.00174707
	Cep72	2.78969	0.17679	0.12305	0.896864	0.994982	0.126109	0.400697	0.876792	NA	NA	NA	NA	NA	NA	NA	NA	-0.167801	NA	-0.278956	NA	-0.02329	-0.335396	-0.0467	NA	-0.125556
	Rfx1	2.87789	0.105009	0.103298	0.896991	0.199657	0.0145738	0.820416	0.979857	0.0680602	0.00496678	0.934392	0.995529	0.496414	0.0362265	0.615083	0.974769	-0.0727849	-0.0187916	-0.0824499	-0.142964	-0.0392372	-0.0545458	-0.0911006	-0.0848666	-0.0608435
	Fam131a	2.8222	0.203017	0.12389	0.897725	0.53956	0.0776271	0.599065	0.952457	NA	NA	NA	NA	NA	NA	NA	NA	0.213389	NA	NA	NA	NA	0.105174	0.339721	0.271382	0.0609702
	Tcf7l2	2.83725	0.205045	0.12023	0.897772	NA	NA	NA	NA	NA	NA	NA	NA	NA	NA	NA	NA	-0.17373	NA	NA	NA	-0.0859079	NA	-0.132066	NA	-0.169446
	9830147E19Rik	2.5629	0.0850193	0.123045	0.897947	1.38031	0.0910263	0.271563	0.823052	0.0364874	0.0024208	0.964226	0.997808	0.874223	0.0580013	0.430595	0.951279	0.0885888	-0.0605857	0.0694859	0.24795	0.0841958	0.00887607	0.166073	0.101925	0.0768408
	Gm23002	2.69728	0.140233	0.124476	0.897974	NA	NA	NA	NA	1.76851	0.183891	0.209247	0.827376	NA	NA	NA	NA	0.136442	NA	NA	0.327115	0.136647	NA	0.194125	0.327115	0.0756777
	Gm15931	2.5929	0.0545927	0.123833	0.898082	2.95534	0.118163	0.0762952	0.638217	5.63229	0.237172	0.0120027	0.385333	4.36359	0.183748	0.0275775	0.954962	-0.0270513	0.0424809	-0.0190663	-0.120406	0	0.00666692	-0.07314	-0.0349103	-0.0140336
	Dock8	2.87807	0.0826743	0.103288	0.898278	1.11541	0.0641583	0.344875	0.870555	1.88357	0.108213	0.174762	0.817025	1.46806	0.0843417	0.251168	0.935845	0.0223003	-0.00051183	0.0156876	-0.00201685	0.0740058	0.00860081	0.0359945	-0.00108661	0.0448467
	Ccdc127	2.88119	0.0677219	0.103112	0.89842	3.58609	0.174776	0.0440955	0.538554	3.08418	0.144986	0.0650704	0.641782	1.66136	0.0780998	0.211869	0.929043	-0.00998006	-0.0134767	0.0041658	-0.0282412	-0.00764324	-0.00239555	-0.0179422	-0.0195816	-0.00173872
	Cox19	2.56527	0.0718855	0.122881	0.898426	1.00872	0.0565346	0.380257	0.879222	3.81497	0.213811	0.0370841	0.572897	0.236439	0.0132513	0.791329	0.993	-0.0275412	0.0136082	-0.0646367	-0.000560454	-0.0556604	-0.0252469	-0.0281104	0.00500467	-0.0601485
	Plrg1	2.54312	0.0719967	0.124427	0.898687	2.23868	0.122601	0.129317	0.732079	0.298183	0.0168834	0.744991	0.971195	2.35292	0.133224	0.117571	0.893016	0.0492715	0.093926	0.00340709	-0.0184875	0.135169	0.044044	0.0583409	0.0267168	0.0692882
	Flywch1	2.56864	0.0859382	0.124678	0.89869	2.09284	0.132681	0.149526	0.744768	1.24072	0.0830205	0.310499	0.899946	0.326803	0.0218675	0.725005	0.98425	0.0995154	-0.056275	0.0273058	0.098157	0.284394	-0.0257521	0.19996	0.0248172	0.174214
	Gm8995	2.88236	0.0737067	0.103046	0.898705	3.7778	0.193293	0.0381352	0.530411	1.2927	0.0661129	0.293738	0.88892	1.54121	0.0788226	0.235434	0.934715	0.0774226	0.147988	0.200047	-0.0961122	0.0540723	0.177602	-0.0210199	0.0279739	0.12706
	Rabl3	2.7899	0.197619	0.123037	0.899033	0.163849	0.023212	0.850904	0.983623	NA	NA	NA	NA	NA	NA	NA	NA	0.200818	NA	NA	0.379752	0.0620376	0.203571	0.19602	0.34587	0.0462577
	Jam2	2.56975	0.0909867	0.122571	0.89927	0.977653	0.063485	0.391288	0.882024	0.319774	0.0226443	0.72949	0.970079	0.0392914	0.00278236	0.961535	1.00078	0.0275786	0.0191373	-0.00421325	0.0535658	0.0398687	0.00617546	0.0467173	0.0388062	0.0178277
	Trf	2.56569	0.0635445	0.122851	0.899273	4.64503	0.228018	0.0202106	0.384884	0.356243	0.0176462	0.704098	0.970715	2.40404	0.119082	0.112694	0.896512	0.0107017	0.0238996	-0.00735939	0.00569572	0.0180647	0.00803837	0.0118802	0.016266	0.00535263
	Senp1	2.56793	0.0671418	0.122697	0.899635	0.349314	0.0224125	0.708848	0.973676	3.71024	0.194018	0.0401291	0.574493	2.27965	0.119209	0.124965	0.897898	-0.0346155	-0.00194316	-0.0683499	-0.0493291	-0.0188677	-0.0364144	-0.0340984	-0.0289696	-0.0436088
	Ube2n	2.53477	0.0678671	0.125015	0.900119	0.519715	0.0254802	0.601509	0.952674	5.23848	0.280515	0.0133441	0.419231	0.148954	0.00797629	0.862434	0.996389	-0.0397096	-0.0790148	0.0250236	-0.12966	0.0287026	-0.0266196	-0.0504786	-0.107916	0.0268631
	Clic5	2.56577	0.0932516	0.122846	0.900243	0.385561	0.0291133	0.684382	0.972845	0.353125	0.0256683	0.706232	0.970096	0.235666	0.0171303	0.791929	0.992556	0.0281243	0.0352982	0.0144214	0.0220286	0.0449525	0.0233811	0.0334905	0.0274445	0.0296869
	Aldh1a3	2.52793	0.0750048	0.1255	0.900355	1.3512	0.0714327	0.278722	0.82599	2.44506	0.145092	0.108941	0.749663	0.291534	0.0172999	0.749837	0.989119	-0.0360548	-0.0306178	0.0256919	-0.0704031	-0.073817	0.00247448	-0.07211	-0.0523349	-0.0240626
	Gpatch8	2.52918	0.0771481	0.125411	0.900474	1.68243	0.103	0.208007	0.792784	0.892404	0.0544424	0.423386	0.913963	1.05228	0.0641961	0.365354	0.935053	-0.0678975	0.0461913	-0.0891586	-0.135774	-0.0980455	-0.0196277	-0.11691	-0.04389	-0.093602
	Atg4a-ps	2.52114	0.0727398	0.125983	0.90059	3.88106	0.227449	0.0352926	0.515896	0.540992	0.0312173	0.589399	0.949941	0.147258	0.00849734	0.863879	0.995453	-0.0205514	0.0340424	-0.00450809	-0.0445488	-0.0608503	0.0128483	-0.0526996	-0.00745381	-0.0326792
	Gm10562	2.53201	0.0754225	0.12521	0.900594	1.80187	0.106586	0.187511	0.779126	0.206022	0.0122738	0.815301	0.980201	2.01159	0.119841	0.15664	0.93305	-0.0263309	-0.0387871	0.0178396	-0.00673841	-0.0823683	-0.00858715	-0.0445534	-0.0193622	-0.0322644
	Gm20425	2.52276	0.0604845	0.125868	0.9013	5.56387	0.263262	0.0106938	0.290643	0.290997	0.0139536	0.750229	0.971196	2.23831	0.10733	0.129357	0.899421	0.0101628	0.0233582	-0.0079882	0.00523751	0.017858	0.00721197	0.0115477	0.015696	0.00493489
	Srxn1	2.52359	0.0829645	0.125808	0.901538	0.399531	0.0249583	0.675199	0.969736	0.304505	0.0200216	0.740416	0.970526	1.74302	0.114606	0.197321	0.921382	-0.015157	-0.0299417	-0.0147967	0.00874247	-0.0296448	-0.0206709	-0.0104512	-0.00777133	-0.0222208
	Mlec	2.50234	0.0729788	0.127333	0.901988	2.09536	0.128764	0.145892	0.74486	1.688	0.0984585	0.206999	0.826524	0.609737	0.0355651	0.552047	0.967815	0.0134782	0.00438818	0.0153712	0.022772	0.00494265	0.011869	0.0138573	0.0160115	0.0101569
	Gja5	2.51258	0.0801331	0.126595	0.90212	0.589811	0.0389897	0.562601	0.939798	1.89862	0.121104	0.172519	0.816425	0.432855	0.0276098	0.65383	0.973969	0.0307101	0.0210226	0.0159345	0.0777068	0.0003229	0.0205062	0.0390148	0.0528192	0.00812871
	Anapc5	2.51069	0.086514	0.126731	0.902235	0.0338141	0.0018426	0.966799	0.997782	1.29663	0.0893589	0.292702	0.887585	0.424546	0.0292582	0.659089	0.973992	-0.0144608	-0.00791471	-0.0165573	-0.00622596	-0.0267627	-0.0122111	-0.0164943	-0.00764339	-0.02166
	Usp25	2.49877	0.0776833	0.127591	0.902334	1.01067	0.0613167	0.379577	0.878514	1.88518	0.117215	0.174521	0.817864	0.437816	0.0272222	0.650713	0.97579	-0.0407524	-0.0767158	0.00221446	-0.063913	-0.0315719	-0.0357613	-0.0477424	-0.0656853	-0.0146787
	Gm9769	2.50325	0.0875628	0.127267	0.902576	0.606804	0.0451414	0.553587	0.936794	0.470366	0.0329064	0.630652	0.955201	0.465248	0.0325484	0.633761	0.974192	0.017926	-0.00570299	0.0387228	0.015896	0.0174051	0.0184324	0.0166505	0.00701899	0.0280639
	Adss	2.50005	0.0911342	0.127498	0.902687	0.23526	0.020437	0.792244	0.979592	0.482778	0.0351973	0.62318	0.956245	0.248251	0.0180989	0.782228	0.995655	-0.0232365	-0.0328854	-0.0258134	-0.0339752	-0.00551147	-0.0276205	-0.0197434	-0.0321134	-0.0156624
	Tbc1d23	2.51336	0.0633314	0.126539	0.90283	0.810406	0.0376707	0.456975	0.910637	1.34122	0.0675918	0.281224	0.881316	4.93464	0.248685	0.0164734	0.938961	0.0158157	0.016648	-0.0119653	0.0422623	0.0132481	0.00325897	0.0277552	0.0324352	0.000641359
	C330018D20Rik	2.49426	0.0786389	0.127918	0.903147	1.13717	0.0717258	0.338105	0.867772	1.40261	0.088443	0.266215	0.86933	0.572038	0.0360704	0.5722	0.970933	-0.0462594	-0.141642	-0.0111499	-0.0232169	-0.0140966	-0.0734378	-0.0186567	-0.0798268	-0.0126233
	H2-K2	2.50372	0.0726424	0.127233	0.903165	4.1236	0.240998	0.0294811	0.474593	0.0306337	0.0017776	0.96987	0.998167	0.327103	0.018981	0.724309	0.985199	0.00632763	0.0197679	0.0133637	-0.0044837	-0.000881391	0.0164229	-0.00268255	0.00643125	0.00624117
	Sars2	3.66121	0.477889	0.128238	0.903725	NA	NA	NA	NA	NA	NA	NA	NA	NA	NA	NA	NA	0.295864	NA	NA	NA	NA	NA	0.295864	NA	0.26087
	Rusc2	2.5039	0.0936039	0.12722	0.904225	0.046206	0.00300867	0.954934	0.996165	0.0752446	0.00562577	0.927744	0.99452	0.501585	0.0375017	0.612042	0.977322	-0.0925203	-0.138736	-0.068493	-0.0442398	-0.117293	-0.105981	-0.0807663	-0.0904953	-0.0928928
	Thada	6.39792	0.761846	0.127162	0.904818	NA	NA	NA	NA	NA	NA	NA	NA	NA	NA	NA	NA	-0.209028	NA	NA	NA	NA	NA	NA	NA	-0.209028
	Med11	2.43952	0.0859701	0.131968	0.905889	0.776661	0.0529837	0.471631	0.914629	0.0469716	0.00331062	0.954206	0.996885	0.644793	0.0454458	0.533997	0.964551	-0.0515577	-0.0481745	0.0135165	-0.0650413	-0.109175	-0.0122794	-0.0871082	-0.0563654	-0.0478293
	4931406P16Rik	2.45579	0.0524887	0.130749	0.906636	5.48964	0.242534	0.0112436	0.296571	3.21449	0.13741	0.0587429	0.616773	1.96146	0.0838465	0.16348	0.931366	-0.00791705	-0.0106961	-0.0111895	-0.00797092	0.000280114	-0.0111508	-0.0038454	-0.00970863	-0.00545471
	Xpnpep3	2.43977	0.0515712	0.131949	0.906803	7.03826	0.283851	0.00412319	0.175701	3.28173	0.138737	0.0557424	0.602412	0.614498	0.0259782	0.549557	0.969241	0.0410476	-0.0666385	0.0860344	0.0220616	0.11251	0.0195448	0.0672856	-0.0237351	0.099272
	Med13l	2.46866	0.0886177	0.131824	0.90681	0.231508	0.0133776	0.795433	0.980143	0.489427	0.0351381	0.620129	0.955678	1.97342	0.14168	0.165127	0.928343	0.130025	0.285102	0.0932259	-0.111177	0.290311	0.168484	0.0963288	0.0558492	0.191769
	Lilrb4	2.41852	0.0416146	0.133562	0.906951	10.0533	0.356276	0.0007288	0.0729167	4.93405	0.169797	0.0164802	0.454098	1.36195	0.0468689	0.276057	0.934064	-0.0302192	-0.00427136	-0.0199613	-0.0455234	-0.0621654	-0.0107395	-0.0538444	-0.0226378	-0.0410633
	Taf10	2.42092	0.0617386	0.133379	0.906958	0.348515	0.0146667	0.709398	0.973787	1.94952	0.0994341	0.165156	0.807338	4.59769	0.234502	0.0209046	0.90495	-0.012454	0.0129588	-0.0433005	-0.0193785	0.00735867	-0.019307	-0.00600991	-0.00552086	-0.0179709
	Dnajc13	2.47143	0.0847095	0.129589	0.907052	0.586962	0.0426622	0.564128	0.941102	0.479533	0.0328724	0.625124	0.956339	0.785482	0.0538455	0.467751	0.955822	0.024553	0.025299	0.013838	0.0479223	0.0118697	0.0199459	0.029896	0.0376382	0.0128538
	Nup98	2.45682	0.0863768	0.130672	0.907102	0.675265	0.0463134	0.518828	0.929523	0.202984	0.014273	0.817738	0.978776	0.614862	0.0432346	0.549367	0.969838	-0.0222307	-0.0475482	-0.0179938	-0.0102995	-0.0190935	-0.0312875	-0.0146965	-0.0255789	-0.0185436
	Ythdf2	2.47904	0.0791486	0.129029	0.907201	1.18925	0.0657032	0.322487	0.84838	1.59954	0.102137	0.223656	0.838385	0.13237	0.0084524	0.876679	0.996747	-0.0262759	-0.0226472	0.016539	-0.0594973	-0.0408498	-0.000232503	-0.0501736	-0.0432825	-0.0121554
	Mfap1b	2.42173	0.089181	0.133317	0.907303	0.717735	0.0533534	0.498462	0.920873	0.0427045	0.00314521	0.95827	0.997405	0.106328	0.00783111	0.899569	0.99752	-0.0235849	-0.0302032	-0.0249934	-0.0277017	-0.0153844	-0.0270127	-0.0215431	-0.0270731	-0.0201889
	Cyb5r3	2.47515	0.0850475	0.129315	0.907416	0.244253	0.0194967	0.785295	0.976931	0.68388	0.0469969	0.514625	0.93411	0.885878	0.0608784	0.425958	0.937005	0.0163706	-0.00433019	0.0203544	0.0331838	0.0101832	0.0103621	0.0216835	0.0167365	0.0152688
	4930503L19Rik	2.47516	0.0842964	0.13307	0.907432	0.530464	0.0630216	0.59725	0.953607	3.17541	0.21629	0.0658916	0.644597	0.737812	0.0502553	0.492074	0.961695	-0.0534012	-0.132532	0.0095091	-0.14068	0.00769875	-0.0633786	-0.041761	-0.129	0.0076808
	Mgst2	2.42983	0.0605264	0.133989	0.907486	6.69814	0.333567	0.00562253	0.221186	0.00400512	0.000199532	0.996004	0.999699	1.65547	0.0824743	0.214973	0.93299	-0.0527241	-0.170919	-0.149717	0.0456932	0.021708	-0.16607	0.0337006	-0.053382	-0.0517601
	Creb3	2.46634	0.0808873	0.129965	0.907497	0.152045	0.0134989	0.859806	0.985625	2.32824	0.152716	0.120007	0.758816	0.032096	0.00210527	0.968457	1.00101	-0.0184365	-0.00915438	-0.0108936	-0.02828	-0.0202742	-0.012032	-0.0242771	-0.019769	-0.0155839
	Slc29a1	2.42281	0.0770817	0.133234	0.907537	0.647222	0.0416992	0.53277	0.930749	1.20813	0.0768732	0.31702	0.901915	1.14913	0.0731187	0.334449	0.932698	0.0509382	0.0943408	-0.0519064	0.0713682	0.0962595	0.0168446	0.0838138	0.0788484	0.0221765
	Obfc1	2.44239	0.0826898	0.131752	0.907614	0.245351	0.0190655	0.784451	0.976869	1.20677	0.0817129	0.317411	0.902392	0.595072	0.0402937	0.559793	0.966624	0.086188	0.0477562	0.101958	0.143283	0.0362392	0.0797133	0.0897612	0.0987591	0.0690985
	Adamts12	2.48158	0.0667155	0.129458	0.907639	0.532043	0.0192458	0.594772	0.953068	5.5695	0.299464	0.0110386	0.371528	0.255902	0.0137595	0.776491	0.995358	-0.0489675	-0.133813	-0.0153432	-0.0808681	0.0429211	-0.0832464	-0.0189735	-0.103555	0.017171
	Cttn	2.42685	0.079095	0.132927	0.907666	0.923366	0.0617432	0.411409	0.879419	0.735047	0.0479128	0.490411	0.936216	0.969504	0.0631955	0.394239	0.947989	0.0142074	0.00566365	0.0100544	0.0437434	-0.002532	0.00809136	0.0206057	0.0254628	0.00376121
	Utp14b	2.40766	0.0744421	0.134396	0.907684	1.39306	0.0904518	0.268491	0.821791	0.962309	0.0595071	0.396865	0.921548	1.11214	0.0687721	0.345904	0.935235	0.0381721	-0.0348996	0.0791294	0.0404704	0.057861	0.0236959	0.0491657	0.00643968	0.0684952
	Aebp2	2.45042	0.0890899	0.13115	0.907771	0.564355	0.040687	0.576405	0.944927	0.0317707	0.00231017	0.968771	0.998339	0.431185	0.0313531	0.654884	0.973328	-0.0204869	-0.018968	-0.0427693	-0.0138104	-0.00370328	-0.0325564	-0.00875685	-0.0174023	-0.0232363
	Psmd9	2.416	0.0645942	0.133755	0.907839	0.0963617	0.00203172	0.9085	0.992615	4.53424	0.242455	0.021876	0.472926	1.36275	0.072869	0.275859	0.936152	-0.0345078	0.0151022	-0.0796235	0.0538558	-0.115519	-0.039057	-0.0308317	0.0340518	-0.0975713
	G0s2	2.45787	0.0758157	0.130594	0.907913	2.08934	0.12107	0.146637	0.744011	1.00322	0.0618908	0.382186	0.921168	0.387982	0.0239355	0.682781	0.974892	-0.0113277	-0.00913573	-0.0104301	-0.00358771	-0.0219266	-0.0108143	-0.0127571	-0.00547721	-0.0161784
	Zbtb39	2.49427	0.0783601	0.131673	0.907964	0.830151	0.0528347	0.452003	0.907018	0.517619	0.032523	0.604544	0.950373	4.32053	0.271468	0.0293419	0.934028	-0.118414	0.155801	-0.140033	-0.406827	0.00853512	-0.0121405	-0.206833	-0.17061	-0.0844566
	Kctd9	2.72406	0.148883	0.129859	0.907968	2.78628	0.304568	0.109194	0.696062	NA	NA	NA	NA	NA	NA	NA	NA	-0.163084	NA	NA	NA	NA	0	-0.214459	-0.126437	-0.248162
	Ppm1a	2.47563	0.0902881	0.129279	0.908237	0.0228764	0.00168459	0.977405	0.99833	0.786121	0.0573408	0.467472	0.926667	0.162815	0.0118759	0.850719	0.996162	-0.0242608	-0.0329348	-0.0210835	-0.0427786	-0.000396227	-0.0272428	-0.0215874	-0.0377923	-0.0107399
	Robo1	2.50707	0.0881594	0.129022	0.908256	0.584044	0.0470652	0.56687	0.940796	0.622173	0.0437565	0.546848	0.938196	1.75922	0.123723	0.197795	0.919703	0.139823	0.0970151	0.234569	0.176881	0.0620723	0.165792	0.127678	0.143059	0.135074
	Dync1h1	2.40953	0.084938	0.134251	0.908259	0.845941	0.0588647	0.442076	0.901569	0.238923	0.0168444	0.789406	0.975877	0.394436	0.0278084	0.678533	0.975624	-0.00745588	-0.0107328	-0.00576181	-0.0100864	-0.0032377	-0.00787681	-0.00666205	-0.0105137	-0.00449976
	Atxn7l3	2.45951	0.0805128	0.130472	0.908266	0.103413	0.00718018	0.902172	0.994576	0.241842	0.0158336	0.787152	0.976092	2.19901	0.14397	0.133691	0.904762	0.0262948	-0.0126594	0.0671665	0.0398774	0.00750522	0.0285852	0.0236913	0.0145932	0.0373359
	Pla2g4b	2.44549	0.100578	0.134366	0.908361	0.170717	0.0209753	0.844339	0.983858	0.520968	0.0428526	0.602188	0.950605	0.742786	0.0610984	0.489105	0.961463	-0.121831	-0.165475	-0.0790163	-0.179751	0.00233417	-0.131784	-0.10499	-0.173633	-0.0698124
	Fam195a	2.41297	0.079247	0.133987	0.908501	0.524615	0.032022	0.598697	0.95282	1.38838	0.0911949	0.269614	0.871411	0.604877	0.0397308	0.554601	0.967004	-0.0924993	0.0961139	-0.212017	-0.0858052	-0.147037	-0.0707771	-0.116421	0.00362853	-0.179527
	Pcolce2	2.42826	0.0700255	0.13282	0.908578	0.626416	0.0380398	0.543378	0.933679	1.58136	0.0912055	0.227258	0.842807	2.41647	0.139371	0.111542	0.894975	-0.018079	-0.00791002	-0.0132498	-0.0652274	0.0154691	-0.0115637	-0.0248791	-0.0389234	0.0011096
	Vps53	2.44803	0.0857297	0.131329	0.908676	0.856685	0.0584272	0.437676	0.898345	0.472452	0.0330904	0.62939	0.954654	0.224456	0.0157209	0.80068	0.992839	0.0614883	-0.00463259	0.0996955	0.0550409	0.0974239	0.0491195	0.0762324	0.0223938	0.0985597
	Chd8	2.43307	0.0830117	0.132455	0.908824	0.311614	0.0204601	0.735307	0.977082	0.806059	0.0550023	0.458835	0.920856	0.820785	0.0560072	0.452568	0.953135	-0.0364576	-0.0287928	-0.0731723	0.0061203	-0.0482696	-0.0535474	-0.0210747	-0.0116433	-0.060721
	Prkra	2.46185	0.0652194	0.130298	0.908861	0.288445	0.014096	0.752099	0.977048	1.38836	0.0735612	0.269619	0.870881	4.46584	0.236619	0.0229784	0.942056	0.0334787	0.0284188	0.00842838	-0.00203831	0.0936206	0.0196246	0.0457912	0.0168571	0.0510245
	Gys2	2.45185	0.0386584	0.131658	0.908884	0.832166	0.0448619	0.448345	0.904285	17.0649	0.538127	3.35362e-05	0.0166667	1.58868	0.0500975	0.226746	0.938298	0.0775559	0.0604655	-0.00953489	-0.0464987	0.2365	0.0420752	0.105623	0.00729767	0.110449
	Ubn1	2.39359	0.0679725	0.135484	0.909071	0.778694	0.0425153	0.470734	0.915024	3.29866	0.187349	0.0550132	0.600889	0.832864	0.047303	0.447497	0.953188	0.0191395	0.0100905	0.00830746	-0.00366526	0.0586511	0.0110935	0.0274929	0.001859	0.0334793
	Tex261	2.45963	0.0324247	0.130463	0.909195	20.6296	0.525867	7.38948e-06	0	1.95932	0.0516586	0.163779	0.807211	2.60958	0.0688029	0.0951951	0.899602	0.0189652	-0.020291	-0.0487468	0.102443	0.0330833	-0.037276	0.0677632	0.0477734	-0.00783175
	Hif1a	2.44567	0.0774363	0.131506	0.909236	1.56104	0.0916496	0.231356	0.81199	0.867497	0.0549344	0.433296	0.914656	0.64012	0.0405358	0.536366	0.966027	0.00933657	0.00168191	0.0105331	0.017287	0.00587629	0.00622614	0.0115817	0.0111183	0.00820471
	Gm8113	2.73145	0.232831	0.132781	0.909266	NA	NA	NA	NA	NA	NA	NA	NA	NA	NA	NA	NA	0.154282	NA	NA	NA	0.10395	NA	0.154282	NA	0.10395
	Gm13703	2.40276	0.083324	0.134773	0.909455	0.842511	0.0596161	0.443491	0.902007	0.233276	0.0161793	0.793786	0.975297	0.641029	0.0444597	0.535904	0.965836	-0.0607751	-0.0202248	-0.138608	-0.0624874	-0.00871397	-0.0846659	-0.0356007	-0.0454762	-0.0736611
	Rasgrp4	2.3741	0.0711042	0.13701	0.909529	0.248344	0.012918	0.782156	0.976141	2.14022	0.128199	0.140469	0.771704	1.61888	0.0969709	0.219894	0.936203	0.0336275	0.0411905	0.0600327	-0.0458512	0.0877209	0.0477495	0.0209349	-0.00812777	0.0738768
	Msmp	3.16276	0.387462	0.135471	0.909856	NA	NA	NA	NA	NA	NA	NA	NA	NA	NA	NA	NA	-0.21695	NA	NA	NA	NA	NA	-0.318723	-0.0728022	NA
	Hsdl2	2.46194	0.0794109	0.130291	0.909908	1.83722	0.118477	0.181875	0.776006	0.698485	0.0450599	0.507583	0.932404	0.234581	0.015133	0.792771	0.992964	0.0196952	0.052439	0.0153164	0.00840521	0.00269916	0.0334943	0.00555219	0.0304354	0.00900778
	Aldh9a1	2.36779	0.0750484	0.137508	0.909945	0.829967	0.0531821	0.448707	0.90489	0.2593	0.0164373	0.773817	0.976853	2.0019	0.126903	0.157937	0.931889	0.0618564	0.215321	0.00551939	-0.0238057	0.0632783	0.104946	0.0197363	0.0910863	0.0343988
	Rnf8	2.41395	0.0940447	0.135201	0.910211	0.548374	0.0400145	0.585942	0.949184	0.138333	0.0107786	0.871596	0.985241	0.440374	0.0343129	0.649606	0.975777	0.113536	0.0166894	0.167976	0.168577	0.108509	0.098927	0.134253	0.0858835	0.138243
	Sppl2a	2.39528	0.0797323	0.135353	0.91031	0.130845	0.00589058	0.878002	0.988529	1.26001	0.0838846	0.302509	0.893929	0.932273	0.0620656	0.408032	0.935854	0.0366898	0.051061	0.0269488	-0.000110184	0.0642361	0.0424052	0.032063	0.0246091	0.0455925
	Orc3	2.39865	0.0615669	0.135091	0.910333	3.52726	0.182857	0.0461219	0.543953	0.740743	0.0380257	0.487793	0.934912	2.5127	0.128989	0.103044	0.898172	0.0308973	0.0104443	0.0613945	0.0892144	-0.0365733	0.0394337	0.0263206	0.049691	0.0124106
	Cdan1	2.36963	0.0823938	0.137362	0.910394	0.0616511	0.00499478	0.940366	0.992188	1.02115	0.0710124	0.375937	0.918555	0.612295	0.0425799	0.550708	0.968697	0.0335485	0.0382506	0.0304419	0.0398677	0.0346472	0.030041	0.0372574	0.0367601	0.0325446
	AY036118	2.38505	0.0866056	0.13615	0.910474	0.479974	0.0342181	0.62486	0.954604	0.0418067	0.00303617	0.959128	0.997388	0.555271	0.040326	0.58142	0.970439	-0.0215023	0.00244125	-0.0157891	-0.0499074	-0.0188369	-0.00795226	-0.0343722	-0.0260446	-0.017313
	4933421O10Rik	2.39079	0.0871458	0.13699	0.910526	0.238957	0.0162481	0.789561	0.97849	0.827452	0.0603223	0.45092	0.921705	0.95538	0.0696484	0.400763	0.933274	0.112163	0.0902557	0.122093	0.22839	0.0500954	0.107277	0.113926	0.159323	0.0864313
	Nle1	2.83127	0.287986	0.136324	0.910683	NA	NA	NA	NA	NA	NA	NA	NA	NA	NA	NA	NA	0.52351	NA	NA	NA	NA	NA	NA	NA	NA
	Gm17711	2.74967	0.23058	0.13586	0.910829	NA	NA	NA	NA	0.587675	0.0985616	0.577922	0.948923	NA	NA	NA	NA	-0.203041	0.0483356	NA	NA	NA	-0.0177131	NA	-0.149616	-0.302951
	Rab3ip	2.37629	0.0799571	0.136837	0.911087	0.766823	0.0445828	0.475999	0.91561	0.948351	0.0638199	0.402012	0.909361	0.456481	0.0307192	0.639126	0.975079	-0.0740524	-0.0657128	-0.0277463	-0.125149	-0.0715757	-0.0443432	-0.0983622	-0.104613	-0.049661
	Vit	2.51873	0.173482	0.138486	0.911196	NA	NA	NA	NA	NA	NA	NA	NA	NA	NA	NA	NA	-0.246486	NA	NA	NA	-0.247136	NA	-0.26327	NA	-0.303394
	Zfp408	2.39399	0.0892424	0.136741	0.911209	0.888129	0.058095	0.426322	0.891634	0.598668	0.0446338	0.558655	0.943212	0.229085	0.0170795	0.797223	0.993635	0.082503	0.0152171	-0.0104742	0.227959	0.0600876	0.000515078	0.144023	0.144474	0.0274038
	Phc2	2.3796	0.0892516	0.136577	0.911331	0.443458	0.0347675	0.647186	0.962406	0.127387	0.00955579	0.88101	0.987474	0.0701959	0.00526567	0.93241	1.00286	-0.026525	-0.0326347	-0.0183353	-0.0329271	-0.0251449	-0.0249444	-0.029036	-0.0320711	-0.0217401
	9030617O03Rik	2.38529	0.0692765	0.136132	0.911369	3.51681	0.204729	0.0464924	0.546759	0.0112892	0.000655749	0.98878	0.998523	0.994937	0.0577925	0.385109	0.945598	0.0291172	0.0669779	0.076404	0.00431995	-0.0185127	0.0701162	-0.00709637	0.0291915	0.0289457
	Tlcd2	2.36785	0.0945006	0.13879	0.911509	0.600946	0.0486479	0.557452	0.936982	0.177615	0.0141772	0.83851	0.979361	0.0657478	0.00524797	0.936559	1.00295	0.0690003	0.0387442	-0.00746338	0.139013	0.0842475	0.0152632	0.11163	0.092266	0.0449428
	Cfh	2.35637	0.0487756	0.138415	0.911752	5.34821	0.220151	0.0123782	0.314973	0.26059	0.0107882	0.772841	0.976597	5.86817	0.242937	0.00872675	0.793333	-0.0100308	-0.0368443	0.00232613	0.0180837	-0.0311598	-0.0152188	-0.00653806	-0.00548527	-0.0144169
	Jup	2.35663	0.0827734	0.138394	0.912636	0.947844	0.0679131	0.402201	0.877638	0.58921	0.0413904	0.562923	0.944529	0.0200514	0.00140856	0.980165	1.00328	0.0281696	0.037542	0.0171518	0.0343628	0.0188196	0.028116	0.0265912	0.0379145	0.0179857
	Rfk	2.34502	0.0577835	0.139324	0.912893	0.840781	0.0305891	0.444206	0.902923	4.12959	0.203514	0.0293513	0.535294	2.64852	0.130524	0.0922251	0.908333	0.020284	0.037368	0.0145536	-0.0345426	0.0632098	0.027752	0.0143336	-0.00194445	0.0388817
	Rtn4rl1	2.35867	0.0817551	0.138232	0.912977	0.0164662	0.00087852	0.98368	0.997539	1.02329	0.0709375	0.375201	0.917993	0.706125	0.0489507	0.503942	0.961478	0.0646952	0.0348918	0.0834861	-0.0289084	0.162377	0.063023	0.0667342	0.00274981	0.122931
	F7	2.43562	0.123598	0.138167	0.91321	0.635151	0.064463	0.542701	0.934612	NA	NA	NA	NA	NA	NA	NA	NA	0.0918021	0.164995	0.0423514	0.0355321	NA	0.100411	0.0355321	0.120171	0.0423514
	Prps1l3	2.34647	0.0571499	0.139208	0.913341	2.94734	0.130576	0.0725213	0.62603	3.95059	0.192439	0.0335086	0.552159	0.957879	0.0466597	0.398491	0.931633	-0.0212963	0.0137237	-0.00945497	-0.0357801	-0.0481242	0.0025889	-0.0419522	-0.0160222	-0.0287896
	Hist1h4d	2.33458	0.0604659	0.140166	0.913362	1.127	0.0655394	0.34125	0.869053	2.07753	0.107617	0.14811	0.788533	3.4331	0.177835	0.0495793	0.892664	0.0125168	0.0130741	0.0118226	0.0207548	0.00524503	0.0128488	0.0129999	0.0178515	0.00853381
	Rps2	2.32825	0.064204	0.140679	0.913519	1.16587	0.0711172	0.329399	0.859025	2.73055	0.150596	0.0862928	0.703365	1.57115	0.086652	0.229307	0.933682	0.00825113	0.0118011	-0.0116881	0.00927784	0.0226766	-0.000152218	0.0159772	0.0103686	0.00549429
	Meis2	2.88424	0.324647	0.140368	0.913671	NA	NA	NA	NA	NA	NA	NA	NA	NA	NA	NA	NA	-0.0879221	NA	NA	NA	-0.063658	NA	-0.0782991	NA	-0.073281
	Cdt1	2.39756	0.102716	0.139939	0.913715	1.97207	0.168974	0.169739	0.772525	NA	NA	NA	NA	NA	NA	NA	NA	0.128955	-0.0189224	0.0533444	0.296878	NA	0.0135036	0.307989	0.123363	0.131137
	Ctnnd1	2.32894	0.0874809	0.140624	0.913963	0.53596	0.0395449	0.592239	0.95266	0.0170223	0.0012788	0.983134	0.998799	0.0936703	0.00703699	0.910929	0.998512	-0.0306384	-0.00990907	-0.00954548	-0.058159	-0.0430701	-0.00912286	-0.0506145	-0.0353491	-0.0263078
	Sdc3	2.33906	0.0490158	0.139804	0.914054	3.95873	0.168798	0.0333064	0.499401	6.10358	0.255805	0.00747504	0.314912	1.12847	0.047295	0.340793	0.933405	-0.0158649	0.0224802	-0.0235004	-0.0309199	-0.0325069	-0.000591097	-0.0317134	-0.00522143	-0.0280036
	Tra2a	2.16296	0.0676062	0.154922	0.914175	0.720557	0.0440151	0.49714	0.920732	0.482683	0.0301739	0.623237	0.955736	2.21202	0.138279	0.132239	0.897606	0.0287579	0.084836	-0.031364	0.0106858	0.0556966	0.0224293	0.0331912	0.0458482	0.0121663
	Klhl28	2.3348	0.0629908	0.140148	0.914239	0.728335	0.0465328	0.493516	0.919407	3.49776	0.188733	0.0471762	0.5785	1.63937	0.0884575	0.215982	0.933647	-0.046393	-0.0764444	-0.0191558	-0.17204	0.0648905	-0.0411933	-0.053575	-0.122692	0.0228673
	Heg1	2.32571	0.0647803	0.140886	0.914362	4.7064	0.253071	0.0193477	0.389879	0.306285	0.0170626	0.739133	0.970531	0.275186	0.0153301	0.761896	0.992596	-0.00726548	0.00100006	0.00419331	-0.0210531	-0.0102953	0.00253441	-0.0156742	-0.0118763	-0.00305099
	Pitrm1	2.16379	0.0631437	0.154846	0.914577	2.10611	0.123487	0.144573	0.743879	0.678875	0.0396218	0.517062	0.933616	1.76699	0.103128	0.193261	0.930481	-0.014695	0.00080515	-0.0109174	-0.0459043	-0.000414326	-0.00692711	-0.0231593	-0.0238764	-0.00566584
	Gltp	2.34726	0.074565	0.139758	0.91461	1.2701	0.0731997	0.300602	0.841121	0.822784	0.0522745	0.452275	0.921229	1.47316	0.0935954	0.250945	0.935944	-0.065887	-0.105752	0.093098	-0.134783	-0.142894	-0.0013488	-0.133036	-0.123338	-0.010868
	Pnn	2.16513	0.0699919	0.154724	0.914786	0.042107	0.00430829	0.958841	0.996287	2.59476	0.167761	0.0963523	0.731111	0.247559	0.0160056	0.782758	0.995514	0.0511583	0.0658988	0.0402474	0.0615543	0.0473276	0.0483054	0.0544409	0.0644546	0.0437875
	Fam213b	2.32903	0.0837602	0.140616	0.914946	0.180062	0.00992896	0.836384	0.982989	0.909159	0.0653932	0.416858	0.913801	0.149235	0.010734	0.862194	0.996234	0.0307386	0.0304935	0.0151466	0.0423833	0.0392653	0.0195353	0.0408243	0.0364163	0.027206
	Supt16	2.16608	0.0568136	0.154637	0.914995	3.18807	0.1491	0.0599697	0.578049	2.52164	0.132279	0.102291	0.74245	0.770264	0.0404062	0.474466	0.957679	0.0261893	0.0128593	0.115615	-0.0390895	0.0106915	0.0705085	-0.014199	-0.0146256	0.0631535
	Degs1	2.15638	0.0467977	0.155524	0.915102	3.38315	0.162523	0.0515268	0.554852	6.8057	0.295394	0.00476742	0.267442	0.272317	0.0118196	0.764034	0.992567	-0.0146382	-0.0146688	-0.0184588	-0.0251345	-0.00777129	-0.0144839	-0.0164529	-0.0187349	-0.0131151
	Akr1c14	2.1673	0.0658778	0.154526	0.915302	0.552397	0.03548	0.583016	0.947518	0.238078	0.0144734	0.790059	0.97551	3.07528	0.186954	0.0655287	0.909496	-0.0802413	-0.126403	-0.0858764	-0.0945257	-0.00739178	-0.114902	-0.0509587	-0.115845	-0.0466341
	Nipsnap3b	2.13452	0.0666773	0.157543	0.915709	1.27737	0.0813718	0.297817	0.84015	1.55651	0.0972433	0.232281	0.841822	0.605231	0.0378118	0.554415	0.967091	0.0242314	0.00304948	-0.00706639	0.0721099	0.0257661	-0.00168971	0.048938	0.0384399	0.00934987
	Nol7	2.17492	0.0753732	0.153835	0.915769	1.21921	0.0847015	0.313858	0.84719	0.294261	0.0203956	0.747845	0.971501	0.326749	0.0226474	0.724558	0.984825	-0.0540111	-0.0787005	-0.141845	0.00771514	-0.00512548	-0.113064	0.00129483	-0.0345335	-0.0734851
	Olfml1	2.15649	0.06339	0.155514	0.915891	3.43898	0.211392	0.0493554	0.545316	0.524497	0.0308352	0.598764	0.949841	0.467962	0.0275115	0.63211	0.974761	0.0172462	0.0261325	0.0364297	0.0230557	-0.00999142	0.0306835	0.00653213	0.0221842	0.0132191
	Gcom1	2.18606	0.0700885	0.152831	0.915976	0.821365	0.0541394	0.452323	0.907452	0.507064	0.0325146	0.608838	0.952686	1.67352	0.107311	0.20963	0.928559	-0.012829	-0.00796843	0.00506002	-0.0153335	-0.0299743	-0.00263913	-0.0226539	-0.0126376	-0.0124572
	Gm20503	2.32102	0.075166	0.141269	0.91606	1.28227	0.0864611	0.296506	0.840251	0.227573	0.0147398	0.798236	0.975295	1.26896	0.0821901	0.30008	0.929569	0.0172865	-0.0140053	0.0207142	0.0271068	0.0268409	0.00588429	0.0269738	0.0103535	0.0237776
	Trmt61a	2.16759	0.0726689	0.154499	0.916195	0.740201	0.0496289	0.488041	0.919559	0.619014	0.0415051	0.547206	0.938067	0.971157	0.0651164	0.393638	0.947216	0.0719059	0.058777	0.0101875	0.155111	0.0708067	0.030893	0.112959	0.102472	0.0404971
	Tomm40l	2.17568	0.0635016	0.153766	0.916275	3.16947	0.181004	0.0608499	0.57963	0.311923	0.0182082	0.735086	0.970056	1.06169	0.0619751	0.362219	0.935386	-0.0326658	-0.0549757	-0.00506637	-0.0170641	-0.0645529	-0.0277671	-0.0408085	-0.0290487	-0.0348096
	Cnr1	2.33052	0.11745	0.152777	0.916584	2.75604	0.277791	0.103528	0.682463	NA	NA	NA	NA	NA	NA	NA	NA	-0.128782	NA	NA	-0.0307549	-0.130765	-0.272849	-0.0807601	-0.0174266	-0.263475
	Thg1l	2.18623	0.090013	0.15754	0.916587	0.606394	0.0549106	0.556693	0.937401	1.78124	0.146677	0.19846	0.819307	0.163214	0.0134399	0.850725	0.99594	-0.123026	-0.18627	-0.291469	0.0893957	-0.203833	-0.219899	-0.0350714	-0.0287467	-0.254969
	Mki67ip	2.15663	0.0594128	0.155501	0.916683	3.6593	0.202399	0.0417076	0.535025	1.68517	0.0928495	0.207509	0.827245	0.226739	0.0124928	0.79889	0.993341	0.0703462	-0.081097	0.0266134	0.0488169	0.281463	-0.0251315	0.16514	-0.0181882	0.154038
	Mmp14	2.18932	0.080864	0.152539	0.916716	0.314917	0.022822	0.732947	0.976732	0.196254	0.0144976	0.823165	0.978691	0.431194	0.0318529	0.654878	0.973572	0.0149036	0.0146119	0.0245349	0.0214497	-0.00162243	0.0206593	0.00991365	0.0182212	0.0114563
	Jak1	2.13184	0.0761911	0.157793	0.916746	1.07879	0.0769577	0.356598	0.871386	0.00595397	0.000425585	0.994065	0.998173	0.339427	0.024262	0.715686	0.984781	0.0157512	0.0428181	0.0227568	-0.00719258	0.00807573	0.0321677	0.000441574	0.0160175	0.0154163
	Tcea1	2.17595	0.0547514	0.153741	0.916977	1.51764	0.0722655	0.240384	0.817651	3.42877	0.172549	0.049745	0.580569	2.33684	0.117599	0.119152	0.89064	0.0216823	0.0606523	0.0364118	0.0138511	-0.0197988	0.0478707	-0.00297386	0.0334666	0.00830654
	Gm13669	2.19005	0.0801498	0.154485	0.916992	0.317116	0.0201163	0.731841	0.977408	0.274834	0.0201163	0.762521	0.973848	1.97526	0.144578	0.164873	0.930734	-0.0329783	0	-0.0366667	-0.0940171	0	-0.0209524	-0.0470085	-0.0470085	-0.0209524
	Eftud1	2.23415	0.0720966	0.152316	0.917245	2.3665	0.154071	0.122332	0.720372	0.0350561	0.00226254	0.965617	0.998179	2.97552	0.192041	0.0764774	0.909548	-0.0524843	-0.138218	0.00903615	0.00623719	-0.0992987	-0.0502536	-0.0661919	-0.059382	-0.0475376
	Daam1	2.19028	0.069412	0.152452	0.917426	0.195524	0.0157637	0.823757	0.980297	1.28284	0.081309	0.296353	0.889854	1.70388	0.107995	0.204153	0.929545	0.0235718	-0.00280761	0.0386508	-0.00592926	0.0545213	0.0221118	0.024296	-0.00155413	0.046586
	Zfp108	2.31416	0.0847292	0.142445	0.917465	0.13516	0.0108414	0.874296	0.989535	0.0940418	0.00688638	0.910609	0.990073	1.26992	0.0929921	0.30065	0.930564	-0.0572926	-0.00680097	-0.095768	-0.136401	0.00589976	-0.0555283	-0.0616417	-0.0714166	-0.0449341
	Pld2	2.13471	0.0582332	0.157525	0.917466	3.3894	0.18567	0.0512789	0.554237	1.87622	0.102363	0.17587	0.818627	0.496041	0.0270632	0.615303	0.975074	-0.0291804	-0.0427731	-0.115099	0.0287242	0.00718212	-0.0783119	0.0179532	-0.00468192	-0.0539585
	Ly86	2.20933	0.0788353	0.152773	0.91749	0.449294	0.0346381	0.644363	0.961378	1.57894	0.112682	0.23084	0.843872	0.879443	0.062762	0.430461	0.951506	0.0873277	0.0332437	0.0537415	-0.00114116	0.330789	0.0335408	0.141114	0.0148383	0.18069
	Sh2b3	2.16818	0.0435336	0.154446	0.917498	4.7371	0.181441	0.0189312	0.393333	4.20725	0.168949	0.0277251	0.513534	3.374	0.135489	0.0518925	0.906767	-0.0497979	0.012137	-0.297749	0.0841673	0.0130183	-0.156499	0.0485928	0.0470089	-0.142365
	Mrpl39	2.30516	0.0803479	0.142572	0.917553	0.0870737	0.00745037	0.91691	0.990666	0.630981	0.0439866	0.541031	0.936966	0.974231	0.0679149	0.392525	0.946132	-0.0219613	-0.0658038	0.00781819	-0.0144698	-0.0213032	-0.0266155	-0.0178865	-0.0380324	-0.00674249
	2610044O15Rik8	2.3479	0.146992	0.153693	0.917583	NA	NA	NA	NA	1.31252	0.164343	0.308179	0.895926	NA	NA	NA	NA	0.187101	0.39557	0.126871	NA	NA	0.255232	NA	0.201607	0.125428
	Mtch1	2.13811	0.0488258	0.15721	0.917596	5.08847	0.223743	0.0147996	0.341827	3.34439	0.152745	0.0530955	0.59229	0.893321	0.0407998	0.423026	0.935233	-0.0212825	0.0274122	0.0221879	-0.0519115	-0.0796791	0.0258751	-0.0657953	-0.0159228	-0.0287456
	Strap	2.19252	0.0609591	0.152252	0.917659	0.799941	0.0412414	0.461467	0.913424	3.17115	0.176336	0.0607696	0.628958	1.41619	0.0787492	0.263014	0.930021	-0.0132426	0.00591075	-0.0139081	-0.0270412	-0.020571	-0.00215391	-0.0238061	-0.0105131	-0.0172396
	Eif4a-ps4	2.17921	0.0780965	0.153448	0.917717	0.26176	0.0194477	0.771958	0.975349	0.251641	0.0180362	0.779637	0.977463	0.849001	0.0608515	0.440818	0.953498	-0.0165104	-0.0164377	-0.0215866	-0.000573922	-0.0240792	-0.0205106	-0.0123265	-0.00946037	-0.0228329
	Ppip5k2	2.11576	0.0551848	0.159302	0.917742	1.61469	0.0743693	0.220703	0.801108	2.31761	0.120899	0.121072	0.756951	2.67963	0.139784	0.089925	0.902979	-0.0205101	-0.0578546	0.0586918	-0.0384567	-0.0515491	0.00573404	-0.0450029	-0.0475928	0.00357138
	Gm20460	2.14016	0.0710204	0.157019	0.917806	0.993484	0.0633848	0.385624	0.880775	1.33689	0.0887285	0.282316	0.881909	0.166787	0.0110695	0.847395	0.995925	-0.0533724	-0.160694	0.00291016	-0.0717987	0.00734291	-0.0727613	-0.0322279	-0.116027	0.00512654
	Hpgd	2.12322	0.0636974	0.158599	0.91781	1.44188	0.0862617	0.257073	0.819772	0.448912	0.026935	0.643797	0.954625	2.2141	0.132847	0.132009	0.898446	-0.0340568	-0.0593062	0.0247063	-0.0437038	-0.0691009	-0.0123985	-0.0564023	-0.0454523	-0.0221973
	Coro2b	2.13611	0.0806362	0.157396	0.917963	0.46231	0.0328597	0.635554	0.958562	0.192544	0.0145367	0.826174	0.979281	0.0224202	0.00169269	0.977851	1.00289	0.0428765	0.0499023	0.00148828	0.0710131	0.0466972	0.0242172	0.0588551	0.062892	0.0240927
	Gm9806	2.19352	0.0777517	0.152163	0.917974	0.321471	0.023285	0.728287	0.976998	0.691964	0.049055	0.510714	0.932004	0.495705	0.0351417	0.615501	0.974443	-0.0473131	-0.107068	0.0265225	-0.0631335	-0.0555134	-0.0360214	-0.0593235	-0.0813094	-0.0144954
	Gemin2	2.35352	0.0867062	0.14239	0.918017	1.51818	0.104823	0.245877	0.814872	0.63818	0.0470225	0.539793	0.935618	1.23867	0.0912679	0.313322	0.927752	0.155513	0.3596	0.330409	-0.172405	0.146674	0.345004	-0.00690766	0.086542	0.239346
	RP23-157G22.1	2.51768	0.200404	0.14366	0.918057	0.022668	0.00360869	0.977637	0.998173	NA	NA	NA	NA	NA	NA	NA	NA	-0.14263	NA	-0.146795	NA	-0.173491	-0.146795	-0.140964	NA	-0.161231
	Wdfy1	2.11736	0.0755568	0.159151	0.918139	0.0513014	0.00213384	0.950101	0.994355	0.718459	0.0512756	0.498123	0.935489	0.683269	0.0487641	0.514922	0.964071	-0.0294661	-0.0328059	-0.0326191	0.000390326	-0.0480182	-0.0357023	-0.0238139	-0.0163509	-0.0403186
	Dusp7	2.15111	0.0823662	0.158824	0.918173	2.48262	0.19012	0.110187	0.697393	NA	NA	NA	NA	NA	NA	NA	NA	-0.133511	NA	-0.471648	-0.199777	0.153101	-0.383111	0.0279484	-0.167321	-0.121027
	Ccdc126	2.17673	0.0784204	0.153671	0.918191	0.66218	0.0506878	0.525284	0.929994	0.500203	0.0360413	0.612853	0.953354	0.127861	0.00921283	0.880597	0.994719	0.0685724	-0.00863466	0.0323179	0.0572456	0.180484	0.0156768	0.118865	0.0266654	0.106401
	Wdr95	2.18795	0.094538	0.158513	0.918208	2.47781	0.214125	0.115493	0.711137	NA	NA	NA	NA	NA	NA	NA	NA	0.0390299	0.0911556	NA	0.0161765	NA	0.0911556	0.0092437	0.053666	0
	Mroh1	2.21039	0.0754732	0.154391	0.918297	1.09026	0.0744533	0.357324	0.871362	2.53478	0.173099	0.107176	0.74856	0.913281	0.0623676	0.419011	0.93566	-0.0770059	0.0212043	-0.0802802	0.10261	-0.275672	-0.0304543	-0.120707	0.0577237	-0.176643
	Pald1	2.1408	0.0653578	0.15696	0.918304	2.14854	0.132566	0.139487	0.7342	0.312515	0.0190819	0.734663	0.970139	1.34611	0.0821921	0.279997	0.932005	0.0512288	0.183997	0.0824442	-0.0141075	-0.0238042	0.126355	-0.0189558	0.0736774	0.02932
	Acot13	2.30991	0.0692641	0.14218	0.918356	0.179835	0.00658099	0.836572	0.982972	3.72685	0.223503	0.0396288	0.574194	0.113031	0.00677863	0.893616	0.997335	-0.0316474	-0.0820118	0.0329823	-0.0999856	0.014084	-0.0192606	-0.0429508	-0.0910578	0.0235331
	Id2	2.19361	0.0832121	0.153433	0.918424	0.498697	0.03663	0.614334	0.953184	0.0161201	0.00122299	0.984021	0.999029	1.06922	0.081119	0.36124	0.935595	-0.0900138	-0.0649989	-0.0445074	-0.110299	-0.155178	-0.059392	-0.111265	-0.0990189	-0.0831106
	2310039H08Rik	2.11872	0.055829	0.159023	0.918441	1.13678	0.0543337	0.338226	0.867353	0.831706	0.0438315	0.44798	0.920022	4.44721	0.234372	0.023289	0.93945	0.0351581	0.0274804	0.0394519	-0.011614	0.076599	0.0405149	0.0324925	0.00911682	0.0580254
	Slc38a2	2.12761	0.069584	0.158188	0.918451	0.0037125	0.000323255	0.996295	0.99893	2.32156	0.151854	0.120675	0.75716	0.399001	0.0260988	0.675545	0.975742	-0.0749151	-0.216652	0.0605218	-0.161771	0.00362492	-0.0705429	-0.0790731	-0.189441	0.0320734
	Zfhx3	2.40268	0.128438	0.141966	0.91859	0.652156	0.0697232	0.535076	0.932148	NA	NA	NA	NA	NA	NA	NA	NA	-0.0646471	NA	NA	0	-0.193941	0	-0.0831176	0	-0.116365
	Haus2	2.11237	0.0714543	0.159622	0.918768	0.471556	0.0317287	0.629932	0.955209	1.44769	0.0979407	0.255749	0.858835	0.305852	0.0206918	0.739445	0.987213	0.0255911	0.0283951	-0.00238379	0.0798247	-0.00321497	0.0127557	0.0383048	0.0555159	-0.00279938
	Tmed4	2.19354	0.0782159	0.152161	0.918887	1.1719	0.0844038	0.327601	0.851463	0.180421	0.0128667	0.836089	0.979586	0.0732329	0.0052226	0.9296	1.00324	0.0250462	0.00954963	-0.0120928	0.0478402	0.0520472	-0.00137741	0.0499437	0.0298909	0.0199772
	1700016P03Rik	2.61716	0.303715	0.156841	0.918901	NA	NA	NA	NA	NA	NA	NA	NA	NA	NA	NA	NA	0.277532	NA	NA	NA	NA	0.453908	NA	NA	0.423908
	Taf12	2.29245	0.0768203	0.143626	0.918922	0.416049	0.0356016	0.664514	0.967231	1.60223	0.107382	0.223129	0.838809	0.256386	0.017183	0.776026	0.994871	-0.037515	-0.0670507	-0.0345968	-0.0738003	0.0160982	-0.0482093	-0.0288511	-0.0698826	-0.00924929
	Atxn2	2.32197	0.0844869	0.14403	0.918967	3.08061	0.224181	0.0693758	0.614382	NA	NA	NA	NA	NA	NA	NA	NA	-0.0758417	NA	-0.01417	0.0751556	-0.166411	-0.198841	-0.0364609	-0.0542328	-0.106133
	Trabd2b	2.16464	0.0546076	0.158485	0.918989	4.0277	0.247817	0.0358403	0.515341	5.21044	0.262889	0.0163951	0.453297	0.499462	0.0252	0.615023	0.975901	-0.0640487	-0.170953	-0.0893524	0.010654	-0.0263487	-0.114226	-0.00520431	-0.0671776	-0.0838038
	Cyfip1	2.14274	0.0622617	0.156781	0.919112	3.61034	0.215515	0.0432882	0.534314	0.568127	0.0330163	0.574337	0.948453	0.457662	0.0265967	0.6384	0.974211	-0.0108152	-0.001356	-0.0193809	-0.00345151	-0.0161062	-0.0105542	-0.00977886	-0.00340935	-0.0177436
	Fam104a	2.31261	0.0696469	0.141958	0.919251	0.604004	0.036683	0.555062	0.93692	1.58002	0.095168	0.227525	0.841942	1.76208	0.106134	0.194084	0.924263	0.0287173	0.022387	0.00320656	-0.0147176	0.106785	0.0109319	0.0460335	0.0019818	0.0549956
	Fam86	2.28415	0.0640296	0.14432	0.919263	0.823024	0.0584616	0.451623	0.907227	3.29057	0.184483	0.0553605	0.599119	1.08102	0.0606063	0.355873	0.937487	-0.0211281	0.0276907	-0.0382926	-0.0366801	-0.0251004	-0.00966913	-0.0308902	-0.00756096	-0.0316965
	Otud7b	2.146	0.0669064	0.156479	0.919342	1.6109	0.0899546	0.221438	0.802211	1.09214	0.0680996	0.352275	0.906913	0.761292	0.04747	0.478474	0.957973	-0.0432816	0.00140706	0.0165598	-0.132439	-0.0507406	0.00958889	-0.0915897	-0.0739238	-0.0170904
	Gm16580	2.36771	0.143746	0.152124	0.919502	NA	NA	NA	NA	1.55187	0.188431	0.254872	0.858413	NA	NA	NA	NA	-0.0649934	NA	NA	-0.122422	-0.00322673	NA	-0.0628243	-0.100705	-0.0336514
	Hlx	2.31564	0.0817021	0.144548	0.919664	1.25495	0.0850437	0.307677	0.847837	0.662865	0.0467753	0.526891	0.934952	1.59562	0.112596	0.228788	0.936863	-0.0903036	0.0561696	-0.105306	-0.0907838	-0.156484	-0.0322969	-0.123634	-0.0278038	-0.155536
	Ccdc28a	2.29338	0.0630751	0.14355	0.919703	0.241155	0.0148571	0.787682	0.977454	3.66182	0.201423	0.041628	0.571709	1.63006	0.0896635	0.21775	0.931807	0.0459795	0.180497	-0.0838459	0.0751299	0.0282274	0.0412852	0.0516786	0.122812	-0.0278092
	Mrps5	2.12452	0.0773075	0.158478	0.919771	0.206928	0.013994	0.814575	0.979159	0.787111	0.0572833	0.467039	0.926506	0.184378	0.0134184	0.832838	0.994611	0.0857211	0.111009	-0.00796299	0.200235	0.0443616	0.0466992	0.122298	0.156109	0.0181993
	Gm11694	3.29627	0.451774	0.143616	0.919894	NA	NA	NA	NA	NA	NA	NA	NA	NA	NA	NA	NA	0.264673	NA	NA	NA	NA	0.147009	NA	0.397009	NA
	Galnt11	2.28789	0.0602613	0.144007	0.919937	0.854325	0.0487281	0.438638	0.899002	0.537391	0.028309	0.591429	0.949678	4.94742	0.260622	0.0163268	0.953333	-0.0440606	-0.0803564	0.0551392	-0.00398695	-0.155719	-0.00518089	-0.0798528	-0.0355103	-0.0502898
	Ptk7	2.61844	0.303818	0.156756	0.92	NA	NA	NA	NA	NA	NA	NA	NA	NA	NA	NA	NA	0.0957674	NA	NA	NA	NA	NA	0.134509	NA	0.102833
	Dph1	2.26529	0.108073	0.151786	0.92004	0.0945007	0.00528534	0.910331	0.991682	0.729713	0.0696264	0.497416	0.935753	0.523545	0.0499547	0.602223	0.977145	0.113762	0.0657155	0.102889	0.118193	0.115971	0.0843021	0.146033	0.102274	0.10943
	Ovca2	2.26529	0.108073	0.151786	0.92004	0.0945007	0.00528534	0.910331	0.991682	0.729713	0.0696264	0.497416	0.935753	0.523545	0.0499547	0.602223	0.977145	0.113762	0.0657155	0.102889	0.118193	0.115971	0.0843021	0.146033	0.102274	0.10943
	Mroh2a	2.36767	0.101139	0.143412	0.920042	0.651355	0.0541408	0.534622	0.932302	0.211653	0.0180822	0.811475	0.978535	1.65816	0.141663	0.221597	0.934921	-0.10988	-0.232049	-0.16531	-0.0733974	0.0286673	-0.182557	-0.0210866	-0.145234	-0.0835773
	Rbm28	2.27639	0.0577911	0.144972	0.920126	2.35227	0.119435	0.117634	0.71295	2.35227	0.119435	0.117634	0.759194	2.35227	0.119435	0.117634	0.892235	-0.00799419	0	0	0	-0.0319767	0	-0.0159884	0	-0.0159884
	AC109197.1	3.30425	0.452374	0.143249	0.920276	NA	NA	NA	NA	NA	NA	NA	NA	NA	NA	NA	NA	-0.283828	NA	NA	NA	-0.282284	NA	-0.282284	NA	-0.283828
	2810403A07Rik	2.20045	0.0563939	0.151545	0.92028	3.97867	0.201829	0.0328163	0.496677	2.44498	0.125321	0.108948	0.748652	0.485772	0.0248991	0.621393	0.973793	-0.0403426	0.0153769	0.0066615	-0.0511457	-0.122212	0.00505212	-0.0866789	-0.0177099	-0.0577752
	Zfp101	2.20218	0.0792482	0.152002	0.920319	0.0201423	0.00324743	0.980077	0.996378	1.09876	0.0790804	0.350889	0.906455	0.674227	0.0485257	0.519769	0.963942	-0.0682053	-0.195432	0.0115728	-0.0563166	-0.0644523	-0.0771435	-0.0603845	-0.115937	-0.0264398
	Eif3f	2.20108	0.0598387	0.151489	0.9205	4.5936	0.245122	0.020966	0.395402	1.13867	0.0619119	0.337644	0.90625	0.0589941	0.00320763	0.942855	1.00189	0.0168029	-0.013018	0.0123374	0.0201105	0.0467269	0.00109329	0.0334187	0.00237649	0.0295322
	Arhgap25	2.13847	0.0959308	0.15999	0.920644	0.576672	0.0517385	0.571296	0.942407	NA	NA	NA	NA	NA	NA	NA	NA	0.12117	-0.108005	0.219973	0.0782516	NA	0.0513917	0.234433	-0.0265829	0.335936
	Ppia	2.29777	0.0702694	0.143184	0.920723	3.2768	0.207764	0.0559565	0.575649	0.35677	0.0218212	0.703739	0.971099	0.0672484	0.00411313	0.935146	1.00353	-0.0473789	-0.103835	-0.0431681	-0.0412482	-0.0221186	-0.0695668	-0.0316834	-0.0641788	-0.0326433
	Zfp808	2.27686	0.0616102	0.144933	0.920881	0.84391	0.0459229	0.442913	0.901532	2.29967	0.124455	0.122895	0.759036	2.69596	0.145901	0.0887419	0.911957	-0.058201	-0.0247447	-0.15554	0.00809115	-0.0488189	-0.0964855	-0.0203639	-0.0159539	-0.102179
	Pyroxd1	2.20172	0.0788299	0.151433	0.920921	0.962566	0.0689068	0.39677	0.88798	0.341525	0.0244558	0.714229	0.968842	0.0600214	0.00429799	0.941891	1.00265	0.0271124	0.0149329	0.00456181	0.0549821	0.03382	0.00987265	0.0444011	0.0347036	0.0191909
	Tbccd1	2.27802	0.0676071	0.144836	0.921008	0.598966	0.0375356	0.557725	0.937112	2.49936	0.148352	0.10418	0.739749	1.11013	0.0658933	0.346536	0.934916	0.0379276	0.026987	0.069045	0.0489378	-0.00141812	0.0514651	0.0237598	0.0384835	0.0338134
	Gm5529	2.20196	0.062821	0.151411	0.921543	2.06413	0.108714	0.149803	0.744596	1.37409	0.0784046	0.273076	0.876371	1.48646	0.0848163	0.247104	0.930348	-0.0159487	-0.0420507	-0.0329989	0.0354879	-0.0251636	-0.0384679	0.00516216	-0.00101072	-0.0290813
	Fbxw2	2.601	0.245355	0.145461	0.921967	NA	NA	NA	NA	NA	NA	NA	NA	NA	NA	NA	NA	-0.252304	NA	NA	NA	NA	-0.368687	NA	NA	-0.270698
	Pth1r	2.28699	0.0784873	0.146104	0.921979	0.777402	0.0533594	0.472998	0.914484	0.393091	0.026981	0.680069	0.964473	2.25517	0.154791	0.130859	0.903152	-0.121502	-0.0119455	-0.382778	-0.0881145	-0.0410993	-0.197362	-0.0646069	-0.0554706	-0.187533
	Tubgcp5	2.27186	0.073603	0.145355	0.92199	1.38518	0.0941411	0.270387	0.823248	1.14225	0.0740125	0.336546	0.904607	0.269859	0.0174856	0.765871	0.991266	-0.0624514	0.0468136	-0.0199556	-0.154826	-0.100286	0.00610698	-0.127556	-0.0607524	-0.0601206
	Celf2	2.26403	0.0653719	0.146019	0.922315	0.346245	0.0208877	0.710963	0.974386	3.13716	0.181165	0.0624127	0.63668	1.20111	0.069362	0.319041	0.927035	0.0154309	0.00452583	0.0270904	-0.0119856	0.0435189	0.0144833	0.0157666	-0.00475632	0.0353046
	Gm17782	2.20241	0.0688912	0.151371	0.922367	0.51242	0.0274116	0.605723	0.952893	1.49851	0.0937465	0.244483	0.850132	1.37257	0.0858676	0.273448	0.9364	-0.0930454	0.081079	-0.339648	-0.0404179	-0.0604948	-0.141728	-0.0504563	0.0206048	-0.200072
	Abcg2	2.2747	0.0681345	0.145728	0.922466	3.95277	0.237289	0.0341494	0.50472	0.594465	0.0356122	0.560482	0.944995	0.008162	0.000488955	0.991874	1.00332	-0.0600638	0.0579794	-0.00423729	-0.106327	-0.175846	0.027015	-0.136922	-0.0350209	-0.0895762
	Maf	2.26405	0.066335	0.14663	0.922534	0.141075	0.00729775	0.869203	0.987865	2.64046	0.154727	0.0937996	0.723343	2.1517	0.126087	0.140126	0.922931	-0.0498253	0	-0.054435	-0.124513	-0.00789676	-0.0311057	-0.066205	-0.0711505	-0.0311659
	Slfn10-ps	2.41746	0.123064	0.145956	0.92286	2.61326	0.266062	0.114262	0.705075	NA	NA	NA	NA	NA	NA	NA	NA	-0.15173	NA	-0.350812	-0.0676219	NA	-0.319405	-0.0129211	-0.104733	-0.216234
	Ubqln1	2.20276	0.0686572	0.15134	0.923293	0.272887	0.0165035	0.763609	0.975499	0.159786	0.00996062	0.853264	0.981885	3.00769	0.187492	0.0691265	0.906704	-0.0159163	9.01457e-05	-0.0118349	-0.0384939	-0.00804296	-0.00821123	-0.0232684	-0.0222605	-0.00993892
	Pdgfrb	2.09936	0.0644177	0.160859	0.923324	0.228094	0.0091862	0.797829	0.979808	2.26586	0.139053	0.126412	0.756909	1.25128	0.0767894	0.3049	0.930843	-0.0497014	-0.0168703	-0.117951	0.0546645	-0.121403	-0.068255	-0.0333694	0.0262608	-0.119677
	Runx2	2.584	0.244142	0.146616	0.923493	NA	NA	NA	NA	NA	NA	NA	NA	NA	NA	NA	NA	-0.167458	NA	NA	NA	NA	-0.0840645	NA	-0.267821	NA
	Ffar2	2.20592	0.0630027	0.15106	0.923642	0.116814	0.00457704	0.890275	0.991831	3.88336	0.221823	0.0352318	0.557692	0.903423	0.0516048	0.41908	0.934516	-0.0157245	-0.0470686	0.0108841	-0.0465182	0.0147287	-0.0151894	-0.0158948	-0.0460201	0.0128064
	Myom1	2.46108	0.14602	0.160687	0.923936	3.69666	0.438658	0.0802194	0.648462	NA	NA	NA	NA	NA	NA	NA	NA	-0.248599	NA	NA	NA	-0.419421	0.0609246	-0.319785	NA	-0.507126
	1190002N15Rik	2.25738	0.0429245	0.146585	0.924037	11.649	0.444709	0.00032055	0.0513514	0.117605	0.00447255	0.889579	0.988282	1.89946	0.0722372	0.172393	0.921668	0.0168951	-0.0200873	0.0204415	0.0527944	0.015302	0.00210087	0.0340482	0.0161397	0.0178718
	Ctdnep1	2.09968	0.0708327	0.160828	0.924102	0.954103	0.0625111	0.399882	0.876963	0.295605	0.0199445	0.746866	0.971024	1.02187	0.0689454	0.37569	0.940743	-0.0402561	-0.0609375	-0.0212232	0.0153385	-0.101982	-0.0396198	-0.0433215	-0.0176749	-0.0616024
	Arl1	2.23646	0.0651162	0.148385	0.924103	2.90284	0.167784	0.0751398	0.630929	0.288545	0.0168024	0.752026	0.971568	1.36324	0.0793836	0.275736	0.937133	-0.0183765	-0.0227846	-0.00928172	-0.0294879	-0.0107971	-0.0144484	-0.0201425	-0.026985	-0.0100394
	Syt6	2.20323	0.0629924	0.151299	0.924121	4.21844	0.244089	0.0274989	0.463918	0.501597	0.0286823	0.612035	0.952901	0.166373	0.00951355	0.84774	0.995569	-0.0282543	0.059729	0.00155289	-0.0739585	-0.0894322	0.0287331	-0.0816954	-0.0120401	-0.0439397
	Ddx21	2.09777	0.071903	0.16101	0.924151	0.180123	0.0112185	0.836335	0.983126	0.791788	0.0542785	0.464999	0.925063	1.06672	0.0731253	0.360557	0.9357	0.043636	0.0783914	-0.0123167	0.0833281	0.0322817	0.027758	0.0578049	0.0785044	0.00998251
	Hipk3	2.20641	0.0727901	0.151017	0.92427	0.826629	0.0550663	0.450107	0.907112	0.954383	0.0629708	0.399779	0.909452	0.771749	0.0509205	0.473806	0.958638	0.0126967	0.0231619	0.0162358	-0.0125467	0.0230245	0.020128	0.0052389	0.00464134	0.0196302
	Jak2	2.24358	0.081259	0.14777	0.924355	0.247089	0.016721	0.783118	0.976729	0.376328	0.0272601	0.690526	0.966333	0.559894	0.040557	0.578862	0.970825	0.0376581	0.0642888	0.00620411	0.0501701	0.0271029	0.035394	0.0386365	0.0597684	0.0166535
	Kcnk6	2.34054	0.10053	0.148323	0.924743	1.46803	0.135739	0.26376	0.8196	0.80916	0.0695091	0.465003	0.92473	1.19359	0.102533	0.332174	0.930778	-0.162009	-0.0652208	-0.0355427	-0.169998	-0.478125	-0.00735371	-0.30559	-0.160727	-0.213877
	H2-Ea-ps	2.20712	0.0677736	0.150954	0.924899	0.232674	0.0134793	0.794254	0.980013	0.108458	0.00666078	0.897673	0.988656	3.33832	0.205019	0.0533457	0.897826	0.00914501	0.0195671	-0.000622124	-0.00635022	0.0246725	0.0094177	0.00916113	0.00602528	0.0120252
	Sacm1l	2.20922	0.0503781	0.150769	0.925152	1.49612	0.06531	0.245	0.818716	7.35438	0.335413	0.00339456	0.228169	0.47124	0.021492	0.630122	0.97439	0.0242079	0.0188108	0.0640819	0.00307235	-0.00159311	0.0483062	0.000739616	0.0123839	0.0312444
	Gm24468	2.09516	0.0655011	0.16126	0.925165	1.43295	0.0895128	0.259122	0.8217	0.988228	0.0617899	0.387495	0.919114	1.0246	0.0640641	0.374749	0.940137	0.0668939	0.129788	0.0993525	-0.0707131	0.120782	0.10714	0.0250342	0.024007	0.110067
	Capn2	2.24398	0.0530744	0.147735	0.925207	5.53834	0.266144	0.0108795	0.290173	1.38372	0.0654551	0.27074	0.872589	1.59588	0.0754914	0.224375	0.940017	0.0103472	0.0263106	0.0175003	-0.0115848	0.00871157	0.0215976	-0.0014366	0.00665611	0.0131059
	Ttll3	2.21099	0.074901	0.150612	0.925278	0.617112	0.0457279	0.548195	0.934924	0.583618	0.0395421	0.565926	0.945325	0.953201	0.0645825	0.400215	0.933466	0.016725	0.0105226	0.00470972	-0.00194547	0.0510211	0.00771508	0.0245378	0.00485879	0.0278654
	Gm6899	2.69762	0.350449	0.16142	0.925518	NA	NA	NA	NA	NA	NA	NA	NA	NA	NA	NA	NA	-0.322323	NA	-0.499266	NA	NA	-0.322323	NA	NA	-0.499266
	Cadm3	2.25277	0.169985	0.161522	0.925588	NA	NA	NA	NA	NA	NA	NA	NA	NA	NA	NA	NA	-0.246609	NA	NA	NA	-0.0458242	NA	-0.0711824	NA	-0.101235
	Syde2	2.26724	0.101757	0.150489	0.925607	1.50682	0.135257	0.249772	0.817557	NA	NA	NA	NA	NA	NA	NA	NA	0.148722	NA	0.101064	0.242345	0.195623	-0.046598	0.222586	0.0883444	0.169207
	Gm13919	2.32589	0.11602	0.149506	0.925688	1.86072	0.185632	0.192046	0.782435	NA	NA	NA	NA	NA	NA	NA	NA	0.0430335	NA	0	NA	0.0968254	0	0.0774603	0	0.0553288
	Snora24	3.74735	0.555381	0.148319	0.925694	NA	NA	NA	NA	NA	NA	NA	NA	NA	NA	NA	NA	0.0304799	NA	NA	NA	NA	NA	NA	NA	NA
	Tifa	2.20737	0.0798538	0.150932	0.925732	0.264269	0.0189718	0.770067	0.97556	0.93527	0.0676686	0.406902	0.910024	0.0181067	0.00131005	0.98207	1.00262	0.0284637	0.0645279	0.021588	0.0299385	0.00067321	0.0427352	0.0153059	0.0456696	0.0111306
	Zfp62	2.24458	0.0702828	0.147684	0.92575	2.45981	0.158129	0.107624	0.694317	0.499324	0.03127	0.613369	0.953494	0.386749	0.02422	0.683596	0.975471	0.0322644	0.0599495	-0.0105674	0.0516116	0.0366658	0.0227584	0.0441387	0.0529998	0.0130492
	Cpox	2.24648	0.0763059	0.14752	0.925776	1.68957	0.116852	0.206716	0.793223	0.378963	0.0257443	0.688767	0.967389	0.0284852	0.0019351	0.971951	1.00283	0.047277	0.0731156	0.0526506	0.0234212	0.0328487	0.0639763	0.028135	0.0503276	0.0427497
	Acat2	2.0878	0.0700277	0.162573	0.925794	0.461601	0.0272135	0.63624	0.958797	1.35	0.0905614	0.279888	0.882614	1.05148	0.070536	0.366333	0.933151	-0.103231	0.0968379	-0.345917	-0.0598962	-0.0860024	-0.140884	-0.0735794	0.0170684	-0.222078
	Ranbp2	2.08221	0.0583231	0.162506	0.925819	3.0386	0.159017	0.0674549	0.604117	1.04833	0.0587277	0.366681	0.906002	1.22262	0.0684914	0.312893	0.929111	0.0327737	0.0727518	0.0952089	-0.00808615	-0.019684	0.0846128	-0.0138851	0.0249888	0.0377624
	RP23-81C12.3	2.24726	0.0822936	0.147453	0.92601	0.496407	0.0358018	0.615087	0.953206	0.0314177	0.00230101	0.969112	0.998243	0.502437	0.0367981	0.611542	0.977391	-0.0208748	0.00305182	-0.0153698	-0.0482504	-0.019265	-0.00737174	-0.0337577	-0.0247647	-0.0173174
	Itpkb	2.23765	0.0661337	0.148282	0.926029	1.70055	0.113376	0.204746	0.791492	1.9161	0.113261	0.169951	0.811295	0.682109	0.0403195	0.515486	0.963424	0.0167095	0.0303157	0.0177008	0.0406603	-0.014579	0.0220294	0.0130407	0.0338255	0.00156091
	Angptl1	2.27926	0.145272	0.162046	0.926079	NA	NA	NA	NA	1.70519	0.217365	0.230566	0.844522	NA	NA	NA	NA	0.125942	0.0742325	NA	NA	NA	0.119397	NA	0.049255	0.210343
	Brpf3	2.22439	0.0813576	0.149435	0.926122	0.11543	0.00894379	0.891496	0.991557	0.87014	0.0636511	0.432232	0.914618	0.0727007	0.00531809	0.930092	1.00305	0.0507824	0.0865039	0.0246363	0.0496866	0.0395738	0.0563182	0.0446302	0.0679613	0.0321051
	Pln	2.13856	0.116753	0.163001	0.926399	0.0892034	0.00973998	0.915111	0.990798	NA	NA	NA	NA	NA	NA	NA	NA	0.096617	NA	0.115142	0.0911553	0.127204	0.126605	0.0854432	0.121993	0.127622
	Gpr17	2.08283	0.0641989	0.162447	0.926498	1.27415	0.0745677	0.298681	0.840669	0.213271	0.0131473	0.809517	0.977052	2.19284	0.13518	0.134385	0.904178	-0.0469732	-0.0669206	-0.00728436	-0.0758115	-0.0447934	-0.0292658	-0.0603024	-0.0701081	-0.0260389
	Fdxr	2.21242	0.0657626	0.150486	0.926545	0.254694	0.0178144	0.777311	0.975854	2.88786	0.171679	0.0760445	0.681851	1.07253	0.0637603	0.358645	0.935798	0.108765	0.361084	-0.145332	0.180686	0.0890858	0.0839264	0.134886	0.262125	-0.0281229
	Zfp954	2.25621	0.0873691	0.15042	0.926572	0.247256	0.0266651	0.78355	0.976346	1.98783	0.153953	0.165949	0.806075	0.548744	0.042499	0.587038	0.973443	0.134443	-0.245921	0.22511	0.118777	0.245708	0.0680998	0.191309	-0.0271019	0.235409
	Gpr133	2.22547	0.0867318	0.149342	0.92666	0.0871587	0.00746889	0.916833	0.99085	0.0527183	0.00410912	0.948761	0.996105	0.0769838	0.00600048	0.926142	1.00315	-0.0223409	-0.0273326	-0.02976	-0.0264616	-0.0074312	-0.0283026	-0.0169464	-0.0264952	-0.0185956
	Dgat1	2.31618	0.170922	0.16653	0.926667	1.61743	0.238717	0.257092	0.819362	NA	NA	NA	NA	NA	NA	NA	NA	-0.173699	NA	NA	NA	NA	-0.378649	0.0133986	-0.176979	-0.170418
	AC079245.1	3.19835	0.444317	0.148228	0.926674	NA	NA	NA	NA	NA	NA	NA	NA	NA	NA	NA	NA	0.278159	NA	NA	NA	NA	NA	NA	NA	NA
	Rbm7	2.22047	0.0732119	0.149779	0.92668	0.288206	0.0150649	0.752274	0.976794	1.65963	0.10944	0.212189	0.827637	0.60661	0.0400015	0.553689	0.967026	-0.0210845	-0.0645223	0.0177237	-0.032192	-0.0113204	-0.0196264	-0.0217562	-0.0475714	0.00320164
	Gpd1	2.03571	0.0558978	0.167078	0.926776	1.69474	0.108062	0.205786	0.792366	3.68419	0.202326	0.0409281	0.573219	0.312396	0.0171559	0.734748	0.987217	-0.00758255	-0.0128159	-0.0187164	-0.00645309	0.0042864	-0.015021	-0.00108334	-0.00893353	-0.00721499
	Acad11	2.07803	0.0411859	0.162911	0.926797	8.38169	0.331209	0.00184422	0.109091	2.67297	0.105955	0.0904115	0.714551	1.63375	0.0647609	0.217047	0.932255	0.0178212	0.0701675	0.0365753	0.0253482	-0.0556276	0.0504712	-0.0151397	0.0474038	-0.00952614
	Zfp9	2.0872	0.061129	0.162025	0.926854	1.59707	0.0945466	0.224141	0.802055	1.55737	0.0912234	0.232105	0.842225	1.374	0.0804826	0.273098	0.935753	-0.029582	0.0151172	-0.10472	0.00348951	-0.0202731	-0.0502098	-0.0083918	0.00480457	-0.0624965
	Aurkaip1	2.22702	0.0731414	0.149206	0.926892	1.68531	0.104822	0.207485	0.7927	0.908855	0.0596985	0.416976	0.913599	0.0164027	0.00107742	0.983743	1.00307	0.0142628	0.00760418	-0.0109937	0.0395924	0.0220557	-0.00317589	0.0308241	0.0242903	0.00553101
	Psmg2	2.35159	0.0696375	0.147439	0.926971	1.11265	0.0566073	0.35608	0.871593	4.99207	0.295659	0.0230902	0.477119	2.60401	0.154225	0.109274	0.904318	-0.116269	-0.241909	-0.177033	-0.319183	0.320901	-0.22465	-0.00788837	-0.256918	0.0798319
	Fam129a	2.22823	0.0538786	0.1491	0.927021	5.03196	0.236799	0.015392	0.345327	0.941609	0.0455362	0.404524	0.908286	2.09058	0.1011	0.146483	0.931948	0.0108247	-0.00853812	0.0176538	0.0134616	0.0223299	0.00477198	0.0178958	0.000691075	0.0199919
	Prickle1	2.0881	0.0710614	0.161938	0.927068	1.51194	0.101705	0.241596	0.817829	0.281323	0.0191478	0.757345	0.9723	0.354894	0.0241553	0.705021	0.984177	-0.0576551	0.00222124	-0.0801061	-0.0594171	-0.0912349	-0.0433869	-0.075326	-0.0284415	-0.0856705
	Limd2	2.23938	0.0735223	0.148132	0.927113	0.0174456	0.00132177	0.982719	0.997311	0.0201295	0.00132177	0.980089	0.999063	2.57198	0.168884	0.0981612	0.899615	0.00704648	0.018018	0	0	0.0129108	0.00772201	0.0064554	0.00772201	0.0064554
	H2-Q10	2.03306	0.0688597	0.167343	0.927207	0.0752151	0.00626765	0.927771	0.989023	1.19275	0.080797	0.321465	0.905418	0.977812	0.0662371	0.391231	0.945976	-0.0169764	0.00760876	-0.0271866	-0.00345982	-0.0384727	-0.0128546	-0.0209663	0.000525137	-0.0328296
	Zfp422	2.04219	0.0548832	0.166431	0.927239	5.47289	0.289803	0.0113719	0.300565	0.0467303	0.00251172	0.954435	0.996418	0.564191	0.0303249	0.576495	0.972664	-0.0515852	0.0913028	0.0336121	-0.187982	-0.122164	0.0627024	-0.155073	-0.0605459	-0.0442759
	Srrm2	2.08356	0.069042	0.162376	0.927273	0.0190742	0.00238212	0.981122	0.996644	1.91775	0.127095	0.169711	0.812615	0.610483	0.0404586	0.551656	0.968177	-0.0242922	-0.0724126	0.0155763	-0.0489332	-0.00075095	-0.023928	-0.0248421	-0.0582866	0.00741268
	Adk	2.21432	0.0744149	0.150319	0.92731	0.670157	0.0450144	0.521338	0.929036	0.759603	0.0510548	0.479233	0.929701	0.841266	0.0565436	0.444006	0.956708	0.0296232	0.0999661	0.0112245	-3.94169e-05	0.0149166	0.0534931	0.00743861	0.0461026	0.0130705
	Tmub2	2.043	0.0655738	0.16635	0.927356	0.485098	0.0409304	0.621794	0.953058	2.22946	0.143117	0.13032	0.765711	0.341834	0.0219435	0.714014	0.984315	0.0291882	0.0643684	0.0316393	0.0440252	-0.0141922	0.0453879	0.0149165	0.0535387	0.00872353
	Rab4a	3.18163	0.443023	0.149038	0.927459	NA	NA	NA	NA	NA	NA	NA	NA	NA	NA	NA	NA	-0.635965	NA	NA	NA	NA	NA	-0.5	NA	NA
	Hist2h2be	2.04873	0.074694	0.167048	0.92753	0.25883	0.0105099	0.774381	0.975193	1.06161	0.0774101	0.363742	0.904558	0.869335	0.0633897	0.43378	0.949245	-0.0754549	-0.012086	-0.0564437	-0.219491	-0.00636838	-0.0354579	-0.111461	-0.135327	-0.031406
	Naa50	2.07471	0.0748017	0.163233	0.927586	1.02979	0.0757463	0.372966	0.877837	0.216402	0.0156043	0.807032	0.977503	0.084534	0.00609558	0.919225	1.00131	0.042942	-0.0172666	0.0142792	0.0596833	0.107107	0.000321384	0.0833951	0.0241969	0.060693
	Golt1b	2.04356	0.0644719	0.166295	0.92793	1.63306	0.112705	0.217178	0.799801	1.40132	0.0884199	0.266522	0.868877	0.292261	0.018441	0.749305	0.989186	0.0129126	0.00595711	0.000674016	0.0160514	0.0250764	0.0037477	0.0205639	0.0119672	0.0128752
	4632415L05Rik	2.21506	0.0702423	0.150254	0.927947	2.8765	0.18101	0.0767384	0.6407	0.0113174	0.00071778	0.988752	0.998655	0.271901	0.0172447	0.764345	0.991642	0.0627567	-0.0711609	-0.0163806	0.191486	0.129337	-0.0412261	0.160412	0.0700782	0.0564781
	Acap2	2.0362	0.0686363	0.167028	0.928285	0.485225	0.0400188	0.621719	0.953447	1.66856	0.112488	0.21054	0.828957	0.161369	0.0108788	0.851933	0.99628	-0.0241351	-0.052425	-0.0100665	-0.0543029	0.0111881	-0.0280261	-0.0215574	-0.0516053	0.000560757
	Cstf3	2.06476	0.0535688	0.166199	0.928323	2.57472	0.133599	0.101162	0.676962	2.24037	0.11625	0.13245	0.763892	3.42458	0.177697	0.052601	0.897426	0.10383	0.132464	0.174357	-0.0695138	0.178013	0.15341	0.0542498	0.031475	0.176185
	Slc46a1	3.26288	0.520987	0.168606	0.928391	NA	NA	NA	NA	NA	NA	NA	NA	NA	NA	NA	NA	0.363675	NA	NA	NA	NA	NA	NA	NA	NA
	Golgb1	2.2158	0.0645151	0.150188	0.928688	0.444772	0.0347533	0.646368	0.963552	2.36223	0.137557	0.116666	0.760305	1.75781	0.102361	0.194804	0.922044	-0.0281825	-0.0710578	-0.0261499	-0.0636366	0.0333581	-0.0429334	-0.0151392	-0.0637119	0.00360408
	Optn	2.02715	0.0441584	0.167936	0.928701	8.6842	0.377468	0.00155022	0.1	0.364144	0.0158646	0.698725	0.969039	1.39125	0.0606127	0.268925	0.932335	0.0159881	0.00287477	-0.0278911	0.0296072	0.0597655	-0.0121905	0.0446863	0.0153629	0.0159372
	Tmem48	2.13084	0.137049	0.168102	0.928766	0.208613	0.0268345	0.814374	0.979536	NA	NA	NA	NA	NA	NA	NA	NA	0.239978	0.251701	NA	0.560033	NA	0.147727	0.365549	0.405867	0.00589988
	Slc16a4	2.02842	0.0532843	0.168411	0.928804	4.74814	0.249456	0.0193107	0.391463	0.468897	0.0246348	0.631802	0.955137	1.8027	0.0947096	0.188366	0.930915	-0.067047	-0.248788	-0.00339416	0.0560704	-0.0542089	-0.126091	0.000930704	-0.0930504	-0.0410435
	Fbln5	1.98556	0.110683	0.179199	0.928994	0.476812	0.0531587	0.629853	0.955326	NA	NA	NA	NA	NA	NA	NA	NA	-0.124542	NA	-0.300608	-0.307039	-0.0632871	-0.0748081	-0.152964	-0.0976453	-0.200235
	Cd55	2.02883	0.0720004	0.167767	0.929	0.154164	0.0080822	0.85801	0.984957	0.642473	0.0456009	0.535172	0.936909	0.777994	0.0552198	0.471042	0.960523	-0.0213918	0.00554687	-0.051645	-0.0257076	-0.00850818	-0.026459	-0.0171079	-0.0110669	-0.0300766
	Psma4	2.02093	0.0699305	0.168563	0.92905	1.5846	0.109786	0.22661	0.807928	0.0446709	0.00309151	0.956395	0.996524	0.309827	0.021442	0.736588	0.986771	0.0154852	-0.00318392	0.00580725	0.0323503	0.0268141	0.00129905	0.0295822	0.0143904	0.0163107
	Slc39a8	2.48339	0.292736	0.166125	0.929083	NA	NA	NA	NA	NA	NA	NA	NA	NA	NA	NA	NA	0.266448	NA	NA	NA	0.302453	NA	0.179221	NA	0.364806
	Scyl2	1.92029	0.0696407	0.179116	0.929188	0.734662	0.0533918	0.490588	0.920276	0.352198	0.0255454	0.706867	0.969755	0.240099	0.0174148	0.788497	0.992977	-0.0424951	-0.0162023	-0.01416	-0.0292134	-0.112292	-0.0138756	-0.0707526	-0.0213117	-0.0632259
	Dusp11	2.03567	0.0671431	0.168346	0.929193	3.16612	0.219269	0.0628366	0.584173	0.315517	0.0208136	0.732809	0.970115	0.159727	0.0105366	0.853403	0.996685	-0.0687925	0.057009	0.0742464	-0.133417	-0.222589	0.0658457	-0.178003	-0.0598926	-0.0741714
	Stx2	2.06964	0.0633126	0.163727	0.929236	1.0239	0.0649168	0.374992	0.876705	1.72582	0.105589	0.200293	0.818657	1.0601	0.0648591	0.362748	0.93466	0.0193172	-0.00110074	0.00146677	-0.0026502	0.0782206	-0.000572935	0.0377852	-0.0017555	0.0398437
	Fignl2	1.97594	0.0662545	0.173185	0.929262	0.435575	0.0274622	0.652119	0.963761	0.215925	0.0144802	0.807411	0.97762	1.77225	0.118849	0.192382	0.926841	0.0500909	0.0411242	0.0903286	0.0555817	0.00336729	0.0738919	0.0294745	0.0518615	0.046848
	Smad7	1.9642	0.0523079	0.179057	0.929467	2.58458	0.117676	0.104701	0.682454	6.55612	0.349186	0.00775353	0.317797	0.152633	0.00812938	0.859608	0.995893	-0.121016	-0.644231	-0.0749626	-0.196811	0.20955	-0.358805	0.0361173	-0.361345	0.0811034
	D1Ertd622e	2.04592	0.0433192	0.166061	0.929568	3.19499	0.143178	0.0596456	0.579924	2.37326	0.1005	0.115604	0.758131	5.5233	0.233894	0.0109906	0.821053	-0.0359303	-0.0668912	-0.127911	-0.106581	0.157553	-0.101577	0.025486	-0.0900011	0.0148213
	H2-Ke2	2.00243	0.0593346	0.170445	0.92957	2.6588	0.157663	0.0914576	0.668132	0.660029	0.0391151	0.526353	0.935362	1.054	0.0624627	0.36478	0.934804	-0.0228994	-0.0750527	-0.0231086	-0.00699316	0.0131777	-0.0488958	0.00309225	-0.0419998	-0.00496547
	Rbms3	1.95274	0.0658206	0.175627	0.929575	0.69174	0.0399921	0.510822	0.925212	1.25871	0.0848542	0.302863	0.893991	0.407014	0.0274382	0.670335	0.975885	0.0140578	0.0033312	0.00553004	0.025671	0.0202283	0.00403846	0.0229496	0.0164591	0.0128792
	Cdc42bpb	2.00934	0.0636642	0.169739	0.929676	0.724482	0.0515346	0.495308	0.919465	1.81376	0.114935	0.185596	0.815378	0.737844	0.046756	0.489124	0.961184	0.0238159	-0.0125945	0.0556766	-0.00941189	0.0501011	0.0261523	0.0203446	-0.00784115	0.0528888
	Ogg1	2.05337	0.0762405	0.165928	0.929688	0.0881638	0.00473802	0.915933	0.991119	0.604648	0.0449004	0.555096	0.941113	0.746916	0.0554651	0.485464	0.961428	0.0905213	-0.0136365	0.191482	0.0931626	0.0658355	0.0964622	0.0880809	0.0385818	0.135543
	Trp53i13	2.02393	0.0637438	0.168863	0.92972	1.20324	0.0757923	0.319221	0.848245	2.13687	0.134601	0.141876	0.774601	0.523465	0.032973	0.599661	0.97658	0.0578794	0.218277	0.00640745	0.0666074	-0.0331745	0.112342	0.0167164	0.131422	-0.0156633
	Gm15956	2.08949	0.0936751	0.170328	0.929776	1.98571	0.161439	0.174109	0.770016	0.864956	0.0775547	0.442397	0.919767	0.25744	0.0230829	0.776609	0.995287	0.0732368	0.164048	-0.00952433	0.0883459	0.0284091	0.0817279	0.0583775	0.144506	-0.000479627
	Cep19	1.97458	0.0709936	0.177973	0.929889	1.52821	0.103743	0.24528	0.818084	1.86874	0.134376	0.184668	0.815976	1.02253	0.0735274	0.380773	0.945543	0.106885	0.29154	0.218281	-0.200565	0.173095	0.247585	0.00919289	-0.0142975	0.192461
	Dnmt3a	1.98055	0.0686411	0.172704	0.929921	1.84304	0.126603	0.180965	0.77605	0.0147575	0.00102292	0.98536	0.998745	0.0787627	0.00545946	0.924507	1.00334	0.0312047	0.0140712	0.035825	0.0442176	0.0329027	0.026234	0.0385601	0.0275179	0.0343639
	Hyi	2.01042	0.0696314	0.169629	0.929973	1.7926	0.123454	0.189021	0.782186	0.0384581	0.00266401	0.962334	0.99668	0.0999173	0.00692131	0.905303	0.99884	0.0355592	0.0421754	0.0522703	0.0386385	0.00373947	0.0478064	0.021189	0.0435883	0.0280049
	Col16a1	2.0478	0.0665556	0.165874	0.929991	1.80854	0.118329	0.186434	0.778696	0.0768364	0.00499452	0.926278	0.994133	0.974865	0.0633682	0.392295	0.946714	0.0307641	-0.00713387	-0.00760411	0.047375	0.0838762	-0.00516899	0.0656256	0.0227866	0.038136
	Gm15932	1.97602	0.0632794	0.173176	0.929991	0.166693	0.00878343	0.847473	0.984658	0.877289	0.0561879	0.42937	0.914132	2.08149	0.133313	0.147615	0.931871	-0.0401846	-0.0346955	-0.0524631	-0.0584958	-0.0250728	-0.0373408	-0.0417843	-0.0443552	-0.038768
	Errfi1	1.97542	0.0889181	0.178994	0.930085	0.055319	0.00498007	0.946363	0.993256	0.245441	0.0220957	0.785252	0.975518	1.81961	0.16381	0.194073	0.925048	-0.0765682	0.0440828	-0.221799	-0.113052	-0.0214521	-0.0888581	-0.0672521	-0.0503523	-0.102784
	Rep15	2.28101	0.221867	0.169409	0.93009	NA	NA	NA	NA	NA	NA	NA	NA	NA	NA	NA	NA	0.205343	NA	NA	NA	NA	NA	0.201828	NA	NA
	Gm6034	2.05087	0.0644452	0.165571	0.930138	0.369812	0.0323617	0.694898	0.972641	2.41572	0.15182	0.111611	0.751979	0.600753	0.0377554	0.556779	0.967871	0.0113566	0.0387205	0	0.0135468	0	0.0165945	0.0067734	0.0243355	0
	Gpcpd1	1.98168	0.0693446	0.172586	0.930212	0.879458	0.0613038	0.428506	0.893097	0.379023	0.0265262	0.688727	0.967612	0.539321	0.0377447	0.59034	0.973552	-0.0314167	-0.0571195	0.00579732	-0.0369813	-0.044786	-0.0232255	-0.0408837	-0.0431162	-0.0194944
	Tmem106b	1.92529	0.0513365	0.178573	0.930246	1.73001	0.0908731	0.199565	0.790565	2.21225	0.117976	0.132213	0.763851	2.34674	0.125148	0.118176	0.891496	-0.00963571	-0.0413498	-0.0040762	0.00325455	0.00222157	-0.0229862	0.00273806	-0.018143	-0.000927318
	H2afj	1.97682	0.0749683	0.173092	0.930282	0.212688	0.0182128	0.809981	0.98007	0.434325	0.0329424	0.652905	0.956813	0.0489431	0.00371221	0.952334	1.00115	-0.00893778	-0.0191786	-0.00833838	-0.00760374	-0.00232384	-0.0131475	-0.00496379	-0.013094	-0.00533111
	Gabpa	1.95291	0.0747634	0.175609	0.930295	0.0298749	0.00296844	0.970605	0.997366	0.514813	0.0394172	0.604338	0.950244	0.0394667	0.00302182	0.961367	1.00092	-0.0178544	-0.0107354	-0.0159451	-0.020943	-0.0207193	-0.0147088	-0.0208312	-0.0164569	-0.0183322
	Igf1r	2.08509	0.139859	0.174341	0.930306	0.411744	0.0552358	0.671507	0.971073	NA	NA	NA	NA	NA	NA	NA	NA	-0.207438	NA	-0.0726381	NA	-0.175765	-0.165828	-0.21987	-0.502525	-0.124202
	Fosl2	2.05251	0.0707463	0.165409	0.930351	0.597729	0.0414133	0.558381	0.937542	0.272939	0.0188154	0.76357	0.973821	1.10917	0.0764626	0.34684	0.935003	0.0132104	-0.00714869	0.014533	0.0178827	0.0241194	0.00530097	0.0210011	0.00684068	0.0193262
	Mier1	2.05402	0.0714664	0.165259	0.930379	0.0195914	0.00383704	0.980616	0.99659	1.77665	0.123632	0.191649	0.824569	0.047263	0.00328889	0.953929	1.00121	0.0292608	0	0.0457746	0	0.0639535	0.0261569	0.0319767	0	0.0548641
	Gm13509	2.00508	0.0719496	0.170174	0.930458	0.552856	0.0392425	0.582761	0.947489	0.386984	0.0277728	0.683441	0.964053	0.491561	0.0352779	0.617952	0.974186	0.0327871	0.030979	0.0105226	0.0508087	0.0359312	0.0229761	0.0433699	0.0417642	0.0232269
	Fbxw7	2.01505	0.073438	0.169158	0.930505	0.266383	0.0203517	0.768477	0.97602	0.322994	0.0235428	0.727209	0.971298	0.622518	0.0453749	0.545391	0.96996	0.0781308	0.0428662	0.0825694	0.196867	-0.0100248	0.0643358	0.0934212	0.123049	0.0362723
	Gne	1.97244	0.0563848	0.17355	0.930553	0.335195	0.0185976	0.718634	0.975207	1.86516	0.106636	0.177551	0.822252	2.80436	0.160332	0.081309	0.910476	0.0782285	-0.176568	0.259686	0.113304	0.0842223	0.0590647	0.0987629	-0.0186899	0.171954
	Lrig3	1.98819	0.0641684	0.172512	0.930592	2.23812	0.148678	0.130385	0.728586	0.135357	0.00873722	0.874126	0.985468	1.12442	0.0725806	0.342807	0.93616	0.0897314	-0.117914	0.0405128	0.231095	0.145506	-0.022919	0.188301	0.0807701	0.0956659
	Cnot6l	2.00366	0.0689243	0.170319	0.93061	1.11297	0.0820287	0.345641	0.8684	0.90684	0.0623893	0.417755	0.91222	0.0135605	0.000932945	0.986539	1.00302	-0.0296898	0.0042897	0.00214889	-0.0634408	-0.0519541	0.0010685	-0.0576975	-0.0329758	-0.0249026
	2310061I04Rik	1.98781	0.115921	0.178968	0.930619	0.0800358	0.00933478	0.923475	0.990582	NA	NA	NA	NA	NA	NA	NA	NA	-0.162655	NA	-0.405315	NA	-0.14187	-0.190826	-0.141728	0.208575	-0.254626
	Dmtf1	2.04879	0.0787396	0.165776	0.930663	0.0453776	0.00361755	0.955722	0.995971	0.162855	0.0125178	0.850685	0.981881	0.277266	0.0213119	0.76035	0.992384	0.0337011	0.0290339	0.0285866	0.0157773	0.0636384	0.0275167	0.0397079	0.0206923	0.0461125
	Zhx2	1.93084	0.0608397	0.177973	0.930684	1.46819	0.0916091	0.251138	0.817095	1.60757	0.101308	0.222085	0.84062	0.327043	0.0206099	0.724351	0.985049	-0.0303116	-0.0079548	-0.0327965	0.00515697	-0.0905356	-0.0195053	-0.0426893	0.00167235	-0.0616661
	Mvd	1.92844	0.0594306	0.180202	0.930724	0.528418	0.0122439	0.597542	0.953108	4.7202	0.290934	0.0209346	0.469231	0.0114495	0.000705701	0.988622	1.00329	0.115716	0.00230364	0.397579	-0.0768791	0.267127	0.199941	0.0314914	-0.0396944	0.338603
	Efemp2	2.44314	0.32824	0.178803	0.93073	NA	NA	NA	NA	NA	NA	NA	NA	NA	NA	NA	NA	-0.238204	NA	NA	NA	NA	NA	NA	NA	NA
	Nos3	1.98529	0.0874582	0.174192	0.930769	0.357314	0.0314815	0.703928	0.973335	NA	NA	NA	NA	NA	NA	NA	NA	0.186367	0.223694	NA	-0.0535281	0.449504	0.298418	0.130222	0.0538678	0.333536
	Myoc	2.5095	0.334177	0.174014	0.930796	NA	NA	NA	NA	NA	NA	NA	NA	NA	NA	NA	NA	0.184513	NA	NA	0.140922	NA	NA	0.184513	0.140922	NA
	Gm15522	2.08224	0.0877105	0.164502	0.930826	0.828833	0.0698261	0.451007	0.906828	NA	NA	NA	NA	NA	NA	NA	NA	-0.0818858	-0.0208979	NA	-0.204092	-0.0697016	-0.0372125	-0.129943	-0.0977937	-0.0385624
	Tbk1	1.95342	0.053592	0.175555	0.930843	1.42481	0.0794324	0.261004	0.821654	2.92952	0.160742	0.073558	0.675641	1.39391	0.0764838	0.268288	0.931084	-0.0279235	0.0369292	-0.123011	0.0066129	-0.0224164	-0.0474877	-0.00790177	0.0190399	-0.0727137
	Acap3	2.01267	0.0751905	0.1694	0.930929	0.453291	0.0336456	0.64109	0.960212	0.373641	0.0279173	0.692325	0.967206	0.0505619	0.00377783	0.9508	1.00153	-0.0410917	-0.0764801	-0.0440286	-0.0560603	0.00887384	-0.0583598	-0.0235932	-0.0666692	-0.0175774
	Tipin	2.11258	0.0825108	0.164304	0.930948	0.217757	0.0221019	0.80653	0.980178	0.297595	0.0232463	0.746392	0.97138	2.73019	0.213265	0.093707	0.898384	0.087326	0.14746	0.0547615	-0.0334006	0.297029	0.0921596	0.0852783	0.0478535	0.129884
	Zfp84	1.92558	0.0616791	0.178542	0.930952	0.814901	0.0517358	0.455061	0.90987	0.308239	0.0197467	0.737727	0.969784	2.02371	0.129645	0.155033	0.936498	0.035694	0.0102089	0.016385	0.0612323	0.0637452	0.00826866	0.0624887	0.0323973	0.0400651
	Pcgf3	1.91722	0.071297	0.180047	0.931003	0.365333	0.0262551	0.698097	0.972363	0.115007	0.00855365	0.891893	0.987658	1.00638	0.0748499	0.381756	0.947096	0.0721172	0.127868	0.0960085	-0.0533808	0.0969843	0.114789	0.0315984	0.0442553	0.0964964
	Med4	1.99629	0.0788614	0.173059	0.931013	0.15828	0.00968426	0.854669	0.985892	1.45424	0.114897	0.257239	0.860818	0.0462807	0.00365655	0.954876	1.00155	-0.0954389	-0.167302	-0.031391	-0.190543	0.0277005	-0.0993463	-0.0970103	-0.177636	-0.00130216
	Nudcd3	1.98294	0.0732932	0.172455	0.931062	0.345498	0.0276424	0.711479	0.974085	0.174435	0.0128949	0.841032	0.979991	0.516049	0.0381483	0.603623	0.976571	-0.0242883	-0.039477	-0.0393507	-0.0192095	-0.00572749	-0.037441	-0.0124685	-0.0267894	-0.0225391
	Fuca1	1.99898	0.0639197	0.170798	0.931065	1.47922	0.0954304	0.248695	0.815421	0.141766	0.00906621	0.868577	0.984487	1.51621	0.0969646	0.240688	0.935272	0.0409398	0.0689455	-0.00423769	0.00867966	0.0985797	0.030692	0.0536297	0.0351907	0.047171
	Tmem234	1.98392	0.0552575	0.172354	0.931089	4.17113	0.233021	0.028469	0.468896	0.0675407	0.00376239	0.934874	0.995352	1.22093	0.0680125	0.313371	0.927273	0.0148787	0.00574791	-0.0275532	0.0250712	0.0561823	-0.0116158	0.0406268	0.015242	0.0143145
	Stard9	1.94417	0.0624231	0.17654	0.931115	1.74951	0.111702	0.196212	0.791479	0.915773	0.0588069	0.414311	0.911683	0.435164	0.0279443	0.652377	0.974902	-0.00914895	-0.00735293	-0.0271712	-0.00171617	0.00180692	-0.0184413	4.53755e-05	-0.00480955	-0.0126822
	Gm5526	1.94956	0.0638909	0.17722	0.931126	0.699771	0.0478964	0.507916	0.924101	0.171769	0.0112584	0.843345	0.979822	2.91064	0.190774	0.0766071	0.907	0.0855197	0.195569	0.0173634	-0.0818966	0.227453	0.0923903	0.0831752	0.0568362	0.11489
	Zfp276	1.95424	0.0520776	0.175469	0.93113	1.50789	0.0922493	0.242464	0.818644	2.3599	0.125776	0.116891	0.760025	2.41782	0.128863	0.111419	0.898148	-0.0689905	-0.336704	-0.016851	0.063991	-0.0420032	-0.156045	0.0109939	-0.117736	-0.0294271
	Gatad2b	2.63814	0.34539	0.165253	0.931146	NA	NA	NA	NA	NA	NA	NA	NA	NA	NA	NA	NA	-0.318376	NA	NA	NA	NA	-0.207502	NA	NA	NA
	BC039771	1.96182	0.0484554	0.175267	0.931245	6.19465	0.306007	0.00734502	0.258088	1.95916	0.0967795	0.164807	0.808971	0.108795	0.0053743	0.897394	0.997324	-0.0613287	-0.073008	0.0911601	-0.143602	-0.0615065	0.00907604	-0.102554	-0.121252	-0.00140498
	Luc7l	1.91543	0.0681994	0.179645	0.93125	0.185088	0.0153102	0.832257	0.983169	0.52985	0.0377309	0.595707	0.948953	0.870227	0.0619693	0.432197	0.949446	0.0631572	0.0452604	0.0402731	-0.0164401	0.174118	0.0448377	0.0788389	0.0162899	0.107196
	Brd8	2.06446	0.0578445	0.164233	0.931256	4.09152	0.21537	0.0301861	0.479872	0.785728	0.0440309	0.467643	0.926765	0.435459	0.0244024	0.652192	0.975225	-0.0254989	-0.0377761	0.0268262	-0.04791	-0.0395418	-0.00276009	-0.0437259	-0.0470726	-0.0063578
	Sh2d4b	2.75576	0.407913	0.172242	0.931294	NA	NA	NA	NA	NA	NA	NA	NA	NA	NA	NA	NA	-0.229884	NA	NA	NA	-0.306863	NA	-0.229884	NA	-0.306863
	Rundc1	1.93092	0.0669267	0.177964	0.931309	0.144456	0.01011	0.866272	0.987227	0.0575749	0.00399117	0.944187	0.99516	1.7581	0.121874	0.194755	0.922727	-0.0292419	-0.0681698	0.00640552	0.000999836	-0.0564741	-0.0300768	-0.0277371	-0.0333562	-0.0250343
	Rasgrp2	1.96629	0.0570486	0.174795	0.931326	3.60158	0.243065	0.0443527	0.540528	1.27917	0.0742258	0.298168	0.890742	0.369605	0.0214469	0.695217	0.983605	-0.0635573	-0.310447	-0.132496	0.0216602	0.0614238	-0.191835	0.041542	-0.102698	-0.0355361
	Aatf	1.93959	0.0681602	0.177031	0.931352	0.254092	0.0147886	0.777769	0.975389	0.494891	0.0347824	0.615982	0.955615	1.00942	0.0709449	0.380013	0.944617	0.0401576	0.0359743	0.00236565	0.083129	0.034628	0.0196679	0.0588785	0.0646828	0.0184968
	Zfyve28	2.07166	0.0469439	0.164799	0.931354	5.55933	0.251826	0.0115438	0.301676	0.508831	0.0230603	0.608422	0.952817	4.46128	0.202186	0.0242837	0.952679	0.115887	0.0451498	-0.353968	0.0782051	0.642178	-0.154409	0.375006	0.0509781	0.179959
	Bnip1	1.94511	0.0649113	0.17644	0.931401	0.400453	0.0276682	0.674598	0.969139	0.0470457	0.00313997	0.954135	0.997198	2.06279	0.137677	0.149972	0.935287	-0.0352655	-0.0497762	-0.0595764	-0.0277925	0.000329875	-0.0585641	-0.0137313	-0.0414933	-0.0296233
	Nup205	1.93837	0.069789	0.177162	0.931411	0.0244615	0.00136865	0.975861	0.999207	0.474592	0.0341744	0.628097	0.955977	0.919126	0.0661843	0.413027	0.93677	0.056471	-0.0031734	0.093405	0.0459139	0.0715965	0.0546269	0.0587552	0.026627	0.0825007
	B430319F04Rik	2.66667	Inf	0.177808	0.931421	NA	NA	NA	NA	NA	NA	NA	NA	NA	NA	NA	NA	0	NA	NA	NA	NA	0	NA	NA	0
	Gm22452	2.66667	Inf	0.177808	0.931421	NA	NA	NA	NA	NA	NA	NA	NA	NA	NA	NA	NA	0	NA	NA	NA	NA	0	NA	NA	NA
	Gm5506	2.66667	0.4	0.177808	0.931421	NA	NA	NA	NA	NA	NA	NA	NA	NA	NA	NA	NA	0.161765	NA	NA	NA	NA	NA	0.161765	NA	NA
	U2surp	1.96828	0.0705935	0.173987	0.931524	0.953591	0.0688342	0.400071	0.876431	0.273933	0.0196496	0.762829	0.973837	0.22925	0.0164444	0.796925	0.993963	0.0154433	0.00405524	0.00965507	0.0297119	0.0203069	0.00601455	0.0250094	0.0164929	0.014981
	Mmachc	2.05445	0.0739032	0.165216	0.931545	0.187892	0.0136147	0.829963	0.981875	0.0921955	0.00663295	0.912262	0.990553	1.09231	0.0785855	0.352219	0.936713	-0.0264673	-0.0595546	0.00556834	-0.0054312	-0.0481932	-0.0253175	-0.0268122	-0.0315778	-0.0213124
	Cat	2.05582	0.0666226	0.165082	0.931574	1.83238	0.117163	0.182636	0.775347	0.265277	0.0171936	0.769308	0.975874	0.803272	0.052063	0.460032	0.953816	0.00715139	0.00167976	0.00624337	0.00658043	0.0154067	0.00364373	0.0109936	0.00322323	0.010825
	Mrps34	1.94233	0.0571972	0.176737	0.931606	2.12791	0.123555	0.141935	0.737072	0.605555	0.0356643	0.554244	0.94061	1.77466	0.104519	0.191979	0.925024	0.0215732	0.0410226	0.0658527	0.0192608	-0.0372559	0.0539381	-0.00899755	0.0282625	0.0142984
	Gss	1.93561	0.068825	0.177459	0.931615	1.10366	0.0814426	0.348588	0.868977	0.23519	0.0167254	0.792299	0.975097	0.255145	0.0181446	0.776968	0.995482	0.0271742	0.0494777	0.0242184	0.0370143	0.00663439	0.0348598	0.0218243	0.0397008	0.0154264
	Gm25494	1.95888	0.0553236	0.174976	0.931648	0.518654	0.0329124	0.60212	0.951965	4.37727	0.247249	0.0244964	0.5	0.328506	0.0185556	0.723322	0.984475	-0.0390036	-0.0221134	0.0071365	-0.0921136	-0.0398498	-0.0105275	-0.0659817	-0.0577973	-0.0163566
	Niacr1	1.98312	0.0755599	0.173038	0.931658	0.876359	0.0664727	0.430332	0.894169	0.0531931	0.00405348	0.948318	0.996358	0.2017	0.0153702	0.818835	0.994203	-0.0716641	-0.0799774	-0.00479683	-0.0718627	-0.115128	-0.0467141	-0.0934954	-0.0809323	-0.0605396
	Pappa	2.23551	0.242056	0.178524	0.93166	NA	NA	NA	NA	NA	NA	NA	NA	NA	NA	NA	NA	-0.180097	NA	NA	NA	0.00211783	NA	-0.182594	NA	-0.0699143
	Homer1	1.89221	0.0658479	0.182203	0.931667	0.397275	0.0320993	0.676673	0.970247	0.821001	0.0571407	0.452477	0.921295	0.703664	0.0489742	0.505112	0.960879	-0.047207	-0.0502992	-0.0362909	0.0213466	-0.118414	-0.0436787	-0.0485337	-0.0130152	-0.0773524
	Mprip	1.9462	0.0699745	0.176323	0.931688	0.925604	0.0684201	0.410557	0.879811	0.216997	0.015604	0.806561	0.977578	0.290824	0.0209128	0.750356	0.989249	-0.00870259	-0.0109923	-0.0122554	-0.0143157	0.0018566	-0.011905	-0.00622957	-0.0123559	-0.00519938
	Ugp2	2.0571	0.0668778	0.164956	0.931696	0.726503	0.0426662	0.494366	0.9201	0.544225	0.0353864	0.587582	0.948735	1.58024	0.102749	0.227481	0.937979	0.0205464	0.0547563	-0.0254891	0.0185245	0.0366223	0.0119532	0.0275734	0.0368021	0.00556659
	Ccnt2	1.94013	0.0729481	0.176973	0.931724	0.0951224	0.0072565	0.909617	0.992158	0.290297	0.0218301	0.750742	0.9708	0.442546	0.0332791	0.647755	0.97529	-0.0208202	-0.0123435	-0.0223261	-0.04657	-0.00104863	-0.0180214	-0.0238093	-0.0301466	-0.0116874
	Pigw	4.15985	0.675317	0.178223	0.931741	NA	NA	NA	NA	NA	NA	NA	NA	NA	NA	NA	NA	-0.0476399	NA	NA	NA	NA	NA	NA	NA	NA
	Arhgap9	1.95169	0.0865874	0.177714	0.93176	0.294188	0.0261035	0.748306	0.977613	NA	NA	NA	NA	NA	NA	NA	NA	-0.110085	0.00621761	-0.124232	0.0361647	NA	-0.06176	-0.174486	0.0247691	-0.284408
	Eral1	1.9852	0.0633853	0.17222	0.931766	2.6552	0.169408	0.0917254	0.667808	0.355825	0.0227221	0.704385	0.970748	0.156186	0.00997369	0.8563	0.996497	0.0709736	0.202472	0.108883	0.0274404	-0.0422401	0.149013	-0.00739985	0.112422	0.0333217
	Gfm2	1.93728	0.0895529	0.180045	0.931788	0.347764	0.0321516	0.710668	0.974553	NA	NA	NA	NA	NA	NA	NA	NA	0.107095	NA	0.201518	-0.0278066	0.202916	0.139591	0.0875545	-0.0389643	0.210993
	Clip1	1.98601	0.0654924	0.172137	0.931972	1.46416	0.0976651	0.252036	0.815603	0.060244	0.00397331	0.941683	0.994911	1.14474	0.0755001	0.335784	0.93205	-0.0379046	-0.0236751	0.0391769	-0.04631	-0.116276	0.00776503	-0.0812931	-0.0366687	-0.0385496
	Ppt2	1.94799	0.065115	0.176133	0.931976	0.77717	0.0461868	0.471406	0.914735	1.20819	0.0807719	0.317002	0.902395	0.49869	0.0333393	0.613742	0.977758	-0.0375172	-0.0971547	0.0289498	-0.0680553	-0.0206952	-0.0279247	-0.0443753	-0.0823171	0.0041273
	Raver2	1.99525	0.0688639	0.171182	0.931993	0.648753	0.0449734	0.531999	0.93022	1.13823	0.0785696	0.337779	0.906247	0.202321	0.0139658	0.81827	0.99429	-0.048543	-0.143784	-0.0196897	-0.0495195	0.0105306	-0.0778614	-0.0194945	-0.0938248	-0.00457957
	Lars	1.85621	0.0606944	0.186256	0.932029	0.319853	0.0184897	0.729434	0.97674	1.2304	0.0804632	0.3107	0.899027	1.3131	0.0858713	0.288405	0.933418	0.0234361	0.0553054	0.00754431	0.0443315	-0.0050759	0.0265968	0.0196278	0.0482006	0.0012342
	Trim45	2.04365	0.134739	0.178357	0.932055	0.561938	0.0740975	0.584406	0.94861	NA	NA	NA	NA	NA	NA	NA	NA	-0.142409	NA	-0.173756	NA	-0.19754	-0.141145	-0.119744	NA	-0.189879
	Arl4d	1.95632	0.0680017	0.175247	0.932056	0.477208	0.0335039	0.626521	0.953588	0.0914534	0.00635783	0.912934	0.990599	1.33754	0.0929859	0.282152	0.927466	0.0322074	0.0922666	0.0135221	-0.00608679	0.032514	0.0517534	0.0132136	0.0419403	0.0230181
	AC140461.1	1.99611	0.0605148	0.171094	0.932111	1.09532	0.0690037	0.351251	0.869694	0.469759	0.0284828	0.63102	0.954795	2.42958	0.147312	0.110342	0.901365	-0.0414626	-0.148567	-0.0415488	0.0561522	-0.0559096	-0.0863413	0.000121313	-0.0354942	-0.0487292
	Gm16731	1.90717	0.0589651	0.18055	0.932128	1.06695	0.0621617	0.360481	0.872012	2.4084	0.148924	0.112289	0.752031	0.243086	0.0150313	0.786194	0.992883	-0.0570213	-0.00529228	-0.00111491	-0.0647303	-0.164878	0.00417414	-0.114804	-0.0353135	-0.0829966
	Lcmt2	1.89074	0.0550001	0.182366	0.93214	1.34217	0.069823	0.280984	0.826374	2.56227	0.149069	0.0989434	0.735953	0.83867	0.0487925	0.445081	0.953687	-0.0350928	-0.0738194	0.0140943	-0.106637	0.0303944	-0.0289765	-0.0381212	-0.0965858	0.0222444
	Ppp1r16b	1.89471	0.0378254	0.181925	0.932164	8.8396	0.375457	0.00141935	0.1	3.58119	0.142987	0.0442604	0.569634	0.177379	0.00708226	0.838597	0.994806	0.0229648	-0.0225282	0.0491121	0.00440734	0.04147	0.0181493	0.0229387	-0.00323939	0.0452911
	Gm15701	1.98404	0.106152	0.180785	0.932185	0.6565	0.0624318	0.533918	0.931474	0.564266	0.0603798	0.581191	0.950521	0.132502	0.0141784	0.876987	0.996532	0.206085	0.307524	0.40615	-0.0520446	0.141026	0.356837	0.0251835	0.12774	0.3001
	Gm23523	1.96086	0.103946	0.181766	0.932191	0.951681	0.100898	0.408212	0.879371	NA	NA	NA	NA	NA	NA	NA	NA	0.11347	0.138161	-0.0413147	0.234734	NA	0.0660539	0.197039	0.181097	-0.000477874
	Extl2	1.92604	0.0674723	0.178491	0.932198	0.267232	0.0177629	0.76784	0.976048	0.467876	0.0327808	0.632163	0.954314	1.07472	0.075298	0.357928	0.93449	0.0339139	0.0482913	0.000939828	-0.000966035	0.0890707	0.0220773	0.0440523	0.0235118	0.0450053
	Prc1	1.90871	0.0579565	0.18163	0.932218	1.07458	0.0762041	0.359485	0.872877	2.46465	0.149675	0.109269	0.748253	1.47312	0.0894605	0.251948	0.930312	-0.0873619	0.0292845	-0.135605	0.0668192	-0.274406	-0.0542116	-0.103793	0.0493704	-0.21347
	Slc44a1	2.06883	0.112371	0.173974	0.932252	1.67095	0.181519	0.226029	0.80627	NA	NA	NA	NA	NA	NA	NA	NA	-0.0887128	NA	-0.18048	-0.0172414	NA	-0.127721	-0.042563	-0.00372191	-0.179363
	Itpr2	1.89291	0.0466608	0.182125	0.932277	3.48792	0.159051	0.0475335	0.549545	3.99871	0.197138	0.0323316	0.552759	0.350673	0.0172884	0.707914	0.984498	0.0131074	0.0151327	0.00625906	0.00597756	0.0252266	0.00871254	0.0156021	0.0122011	0.0157428
	Fancl	1.96918	0.0586798	0.173892	0.932281	0.482926	0.0290662	0.623092	0.953749	1.25835	0.0749955	0.302961	0.893227	2.55317	0.152164	0.099683	0.899055	-0.0484741	-0.171394	0.0191743	-0.0212935	-0.0226287	-0.0754327	-0.0219611	-0.0966768	-0.00172723
	Ddx18	1.90266	0.0576714	0.181047	0.932326	1.47085	0.0887028	0.250546	0.818091	2.32709	0.141072	0.120122	0.758251	0.246432	0.0149392	0.783622	0.993962	-0.0476117	-0.0646169	0.0833565	-0.135459	-0.0691951	0.0120823	-0.102327	-0.102718	0.00708073
	Tmcc3	1.85712	0.0599557	0.186153	0.932463	1.6878	0.109523	0.207035	0.793163	0.230644	0.0148924	0.795836	0.975489	1.14041	0.0736348	0.33711	0.931875	0.0182152	0.0191057	-0.00684616	0.0135022	0.0494077	0.00546997	0.031455	0.0155131	0.0212808
	Kpna1	1.94017	0.0673862	0.176969	0.932528	0.606306	0.0398899	0.553849	0.936603	1.14877	0.0797984	0.334557	0.90474	0.170718	0.0118588	0.844118	0.996201	-0.0244167	-0.00836164	-0.0762911	0.00754909	-0.0201085	-0.0441208	-0.00627969	0.000246928	-0.0481998
	Lrch3	1.85459	0.06178	0.186441	0.932573	1.71625	0.1219	0.201967	0.791437	0.845327	0.0563189	0.442329	0.919962	0.0207795	0.00138441	0.979453	1.00296	0.0279076	0.0526396	0.0470669	0.0107805	0.011772	0.0480231	0.0112762	0.028	0.0294194
	Gps2	1.91183	0.0659788	0.180039	0.932574	0.435045	0.0302432	0.652452	0.96382	0.179709	0.0124038	0.836675	0.979259	1.41756	0.0978421	0.262694	0.930919	-0.0323876	0.0152713	-0.0322259	-0.0826981	-0.0191285	-0.0133101	-0.0509133	-0.0387275	-0.0256772
	Gmnn	2.01124	0.142304	0.181582	0.93258	0.0610942	0.00864534	0.941025	0.99205	NA	NA	NA	NA	NA	NA	NA	NA	0.249054	NA	0.317073	0.333333	NA	0.207682	0.333333	0.194828	0.317073
	Naa16	1.98956	0.151603	0.186034	0.932735	0.066989	0.010209	0.935584	0.991333	NA	NA	NA	NA	NA	NA	NA	NA	-0.166048	NA	-0.126437	NA	NA	-0.132925	-0.215733	-0.208595	-0.177463
	Hexb	1.98608	0.0635726	0.172129	0.9328	0.753159	0.0548567	0.482139	0.917516	1.51808	0.0971845	0.240291	0.848692	0.856289	0.0548181	0.437837	0.950751	-0.0284675	0.0146364	-0.0538289	-0.000397695	-0.0686208	-0.0203526	-0.0345092	0.00673384	-0.0612249
	Tssc4	1.90445	0.0545276	0.182098	0.932972	1.241	0.0578076	0.309446	0.848379	2.73249	0.156472	0.0881558	0.708847	2.03746	0.116672	0.155342	0.935504	-0.0842203	0.252114	-0.259603	-0.16144	-0.176506	0.00413421	-0.164029	0.045337	-0.217526
	Dcaf12	1.85094	0.0612209	0.186859	0.932981	0.25355	0.0163972	0.778182	0.974776	1.10924	0.0733775	0.346819	0.907463	1.32861	0.087889	0.284421	0.931046	-0.0899031	0.0755625	-0.304129	-0.0560117	-0.0495809	-0.127688	-0.0527963	0.00585421	-0.176855
	Zfp874a	1.85143	0.0645283	0.186802	0.933171	1.91315	0.133359	0.170381	0.771241	0.00351797	0.000245224	0.996489	0.99953	0.00351797	0.000245224	0.996489	1.00162	-0.0206211	0	0	-0.0394737	-0.0430108	0	-0.0412422	-0.0197368	-0.0215054
	Smoc1	1.89817	0.050511	0.181542	0.933194	2.25704	0.120442	0.127347	0.728148	3.87661	0.206316	0.0354103	0.555414	0.206899	0.0110113	0.814599	0.993598	0.0135673	-0.0267615	0.0200412	0.00841524	0.050201	-0.0023513	0.0293081	-0.00837244	0.0351211
	Vcp	1.90002	0.0604273	0.181338	0.933221	1.00215	0.0649082	0.382563	0.880431	1.58632	0.100901	0.226267	0.842038	0.683071	0.0434481	0.515018	0.963805	-0.00669025	-0.0207068	-0.00396658	-0.00728297	0.00399099	-0.0117735	-0.00164599	-0.014206	1.2206e-05
	Snrnp200	1.85257	0.0649826	0.186673	0.933279	0.795878	0.0558256	0.463223	0.913729	0.411516	0.0288695	0.667428	0.961965	0.620653	0.0435413	0.546357	0.96991	-0.0132589	-8.35471e-05	-0.00655631	-0.0370722	-0.00698723	-0.0044559	-0.0220297	-0.0197959	-0.00677177
	Isg15	1.91406	0.0925083	0.185513	0.933443	0.548053	0.0592736	0.588548	0.951112	0.819024	0.0791685	0.458517	0.92154	0.0212192	0.00205109	0.979032	1.00306	-0.145066	-0.00494016	-0.152731	-0.137931	-0.248958	-0.0814359	-0.179531	-0.0960794	-0.204882
	Snora64	1.99009	0.0582859	0.171715	0.933452	0.949007	0.0617006	0.401769	0.87805	2.52265	0.147767	0.102207	0.743571	1.10509	0.064732	0.348134	0.935399	0.00821511	0.0112457	-0.0110868	0.00994084	0.0215971	1.35536e-05	0.015769	0.0105206	0.00525514
	AL607123.1	1.85824	0.0623989	0.186025	0.933497	0.909887	0.0620806	0.416577	0.881407	0.693858	0.0465989	0.509803	0.933135	0.857157	0.0575659	0.437483	0.951543	-0.0186403	-0.0463554	-0.0299567	0.0213924	-0.02737	-0.0359826	-0.00298879	-0.00876213	-0.0286634
	Acadvl	2.00545	0.0565816	0.172121	0.933541	1.96786	0.121145	0.165895	0.767593	3.28085	0.185131	0.058579	0.616809	1.47033	0.0829675	0.253653	0.928613	-0.0712841	0.0731347	-0.352354	0.0524318	-0.0277294	-0.144379	0.0123512	0.0502825	-0.190042
	Vezt	1.88677	0.0455124	0.182808	0.933611	5.64375	0.268752	0.0101346	0.288957	1.67826	0.0809653	0.208765	0.826511	0.962703	0.0464443	0.39672	0.949115	0.0600134	-0.153481	0.00763507	0.229177	0.147102	-0.0725835	0.18814	0.0469694	0.0773685
	Wdyhv1	2.03262	0.0710747	0.172059	0.93366	0.769452	0.0903584	0.478742	0.916624	1.62876	0.113906	0.225337	0.841193	2.38466	0.166769	0.122218	0.895406	-0.0737822	-0.282006	-0.0824451	0.0710363	-0.107083	-0.136689	-0.0139489	-0.0574096	-0.083353
	Ncr1	2.18321	0.23166	0.183046	0.933721	0.120497	0.0255719	0.888279	0.991436	NA	NA	NA	NA	NA	NA	NA	NA	0.388656	NA	NA	0.342463	NA	0.352273	0.423514	0.356847	NA
	2810032G03Rik	1.99128	0.0438437	0.171591	0.93375	0.280465	0.0122459	0.757979	0.975191	7.69409	0.338814	0.00276439	0.207813	2.23871	0.0985829	0.129314	0.9	-0.0527935	0	-0.155852	-0.0714286	-0.000347222	-0.0693528	-0.0358879	-0.0357143	-0.0780997
	Pex6	2.01507	0.068517	0.171943	0.933779	1.4158	0.0883822	0.267205	0.822088	1.63595	0.111252	0.221038	0.839436	1.14562	0.0779071	0.339041	0.930918	0.0993375	0.199903	-0.0835717	0.181978	-0.00690773	0.0767184	0.0875352	0.225079	-0.0352
	Gm15712	2.34877	0.292187	0.185955	0.933933	NA	NA	NA	NA	0.344905	0.0858125	0.723903	0.971022	NA	NA	NA	NA	-0.189252	NA	NA	NA	-0.135529	NA	-0.0764636	-0.219167	-0.146623
	Pgap1	1.88512	0.056693	0.182993	0.934081	1.30329	0.0855526	0.290957	0.838753	2.57405	0.154824	0.0979957	0.736912	0.305761	0.0183909	0.739511	0.987089	0.078428	-0.0228462	-0.00814798	0.227898	0.0836135	-0.00740634	0.155756	0.113688	0.0377328
	Pbxip1	1.85946	0.0587652	0.185886	0.934124	0.139416	0.010057	0.870596	0.988304	2.95592	0.186834	0.0720276	0.668519	0.296013	0.0187101	0.746569	0.987879	0.0408986	0.0402594	0.0700947	-0.0288527	0.0911582	0.0521602	0.0311527	0.00257104	0.0806264
	Gm19807	1.86278	0.0616427	0.185509	0.934126	1.41006	0.0953521	0.264454	0.818992	0.773087	0.0511657	0.473213	0.929872	0.494942	0.0327571	0.615951	0.974866	-0.0233015	-0.0636716	-0.0352172	0.00729514	-0.00606925	-0.0478631	0.000612947	-0.027567	-0.0206432
	AC159323.1	1.86437	0.0665175	0.185328	0.934236	0.00881643	0.000144515	0.991226	0.999653	0.535388	0.0382034	0.592563	0.949839	1.03775	0.0740503	0.370253	0.93742	-0.0546057	0.0336274	-0.127762	-0.059453	-0.044555	-0.057703	-0.052004	-0.0190896	-0.0861585
	Dcaf4	1.85998	0.0449523	0.185827	0.934316	2.00221	0.0988834	0.157896	0.751302	0.327279	0.0158195	0.724185	0.970838	5.92884	0.286579	0.00838375	0.809524	-0.0293259	0.00712435	-0.042157	-0.0524048	-0.00717486	-0.0258593	-0.0297898	-0.0332395	-0.0246659
	Sgms1	1.95736	0.109349	0.1852	0.934347	0.417538	0.0487044	0.667193	0.969811	0.693975	0.0775386	0.517177	0.933508	0.359861	0.0402077	0.70451	0.984715	-0.0856567	-0.221606	-0.0679563	-0.00197284	-0.0541286	-0.144781	-0.0392722	-0.110011	-0.0575603
	Matn2	1.86653	0.0461716	0.185083	0.934375	3.80621	0.20755	0.037329	0.526462	3.65105	0.180629	0.0419696	0.571667	0.32245	0.0159526	0.727594	0.984033	-0.036568	-0.12966	-0.073832	0.0292672	-0.000345404	-0.094684	0.0144609	-0.0407317	-0.0370887
	3110043O21Rik	1.86828	0.0669966	0.184885	0.934403	1.22583	0.0883304	0.311987	0.848872	0.153647	0.0110196	0.858448	0.981605	0.129479	0.00928624	0.879189	0.994753	0.0102374	0.00613894	0.0162015	0.00995193	0.00965878	0.0115083	0.00980535	0.00756419	0.0129302
	Phxr4	1.89348	0.061779	0.183308	0.93444	0.524356	0.0521906	0.599486	0.952803	1.91726	0.12511	0.171877	0.818721	1.43626	0.0937223	0.260238	0.926224	0.04347	-0.129935	0.0827631	0.0759736	0.0691737	0.00745638	0.0725737	-0.000439745	0.0759684
	Arrdc4	1.8753	0.0619761	0.184093	0.934545	0.352368	0.0291311	0.706751	0.973178	2.08591	0.137873	0.147063	0.78527	0.253329	0.0167443	0.77835	0.995924	-0.0408315	0.00479492	-0.0625713	-0.0517934	-0.037048	-0.0352857	-0.0444207	-0.0271696	-0.0498096
	E430025E21Rik	1.86845	0.0476642	0.184866	0.934926	0.166472	0.00969408	0.847657	0.984171	4.94813	0.252454	0.0163187	0.455	2.05129	0.104657	0.151442	0.931069	0.0575345	0.0455713	0.0557605	-0.010102	0.146494	0.0476317	0.0681962	0.0195083	0.101127
	Bnc2	1.9042	0.0589178	0.183632	0.934992	1.02002	0.0672184	0.379504	0.878505	1.03147	0.0638295	0.375601	0.918202	3.65623	0.226254	0.0453551	0.906034	-0.058236	-0.133628	-0.112598	-0.066157	0.0334795	-0.110169	-0.0163388	-0.0821284	-0.0365755
	Ccl9	1.87601	0.0267738	0.184014	0.93507	8.86593	0.283377	0.00139838	0.105	9.12237	0.260384	0.00121097	0.145238	4.60804	0.131529	0.0207507	0.905	0.00951965	-0.000292763	-0.00156305	-0.0180212	0.0479745	0.00170343	0.0149767	-0.00677102	0.0232057
	Hal	1.84611	0.033718	0.187414	0.935199	10.0342	0.387748	0.000736282	0.0734694	4.05086	0.147973	0.0311064	0.552688	0.867593	0.0316921	0.433257	0.950286	0.0127274	0.00275558	0.00584588	0.00777015	0.0260183	0.00539112	0.0168942	0.00761321	0.0159321
	Gm7097	2.96173	0.496791	0.18374	0.935211	NA	NA	NA	NA	NA	NA	NA	NA	NA	NA	NA	NA	-0.456958	NA	NA	NA	NA	-0.295194	NA	NA	NA
	Gucy1a3	1.87663	0.0584443	0.183944	0.935513	2.39936	0.152011	0.113132	0.702204	0.264487	0.016474	0.769902	0.975686	0.952673	0.0593387	0.40041	0.933171	0.0351545	0.0507127	0.129423	0.00970476	-0.0453877	0.0926729	-0.0178414	0.0288964	0.0420174
	Piezo1	1.84701	0.0548216	0.18731	0.935552	2.48959	0.151679	0.105019	0.682641	1.80042	0.106878	0.187747	0.817917	0.132122	0.00784311	0.876894	0.996639	-0.00912617	-0.00407332	-0.00125906	-0.0190729	-0.0143176	-0.00191732	-0.0166953	-0.0114146	-0.00778834
	Vps4b	1.86853	0.0579072	0.184857	0.935697	1.61208	0.0921187	0.221209	0.801301	1.02612	0.0636004	0.374227	0.916938	1.06136	0.0657847	0.36233	0.935116	0.0283755	0.0886567	-0.0286364	0.0299878	0.0297104	0.0242288	0.0298491	0.059019	0.000536978
	C920025E04Rik	1.84126	0.0411776	0.187973	0.935761	2.76611	0.120733	0.0838518	0.655193	7.03004	0.314438	0.00414426	0.249383	0.140735	0.00629477	0.869461	0.996199	0.0242786	-0.0231318	0.00882024	0.0590636	0.0585411	-0.0110868	0.0588024	0.0188337	0.0336807
	Fbxw9	1.97241	0.11844	0.187793	0.936062	1.44659	0.171021	0.276854	0.826823	0.328098	0.0394032	0.727105	0.971679	0.0657716	0.00789891	0.93671	1.00287	0.176563	0.191262	0.396581	0.0931427	0.160915	0.279501	0.105608	0.142202	0.243978
	Etv5	1.86918	0.0687233	0.184784	0.936139	0.110703	0.00833664	0.895679	0.992911	0.19174	0.0140992	0.826828	0.978781	0.862273	0.0634057	0.435406	0.948901	-0.0180318	-0.0153599	-0.0307095	-0.00921027	-0.0151035	-0.0243997	-0.0121569	-0.0132596	-0.0229065
	Zfp35	1.94729	0.096296	0.18462	0.936416	2.13732	0.211387	0.154865	0.750663	NA	NA	NA	NA	NA	NA	NA	NA	0.171594	0.431644	0.266587	0.090388	NA	0.353716	-0.019418	0.261016	0.0590079
	Snord68	1.84163	0.0676597	0.187929	0.936437	0.227338	0.0165587	0.79842	0.979921	0.311079	0.0228575	0.735691	0.970029	0.650277	0.047781	0.531232	0.965365	0.0100098	0.0112751	0.0191844	0.00216934	0.00958019	0.0146055	0.00587477	0.0055906	0.0143823
	Arsj	1.8324	0.0635432	0.188998	0.937279	0.695595	0.04793	0.508968	0.924202	0.00711729	0.00049362	0.99291	0.998509	1.29964	0.0901367	0.291911	0.931543	-0.070631	-0.0485154	0.00662879	-0.116667	-0.136164	-0.0124822	-0.126415	-0.0772549	-0.0647674
	Nabp2	1.82942	0.0571025	0.189345	0.937299	0.295339	0.0196752	0.74706	0.977711	0.257557	0.0160785	0.775137	0.977137	3.05114	0.190473	0.0667895	0.912828	-0.0169458	0.0217209	-0.0354007	-0.0369492	-0.014966	-0.00714472	-0.0259576	-0.00823997	-0.0251834
	2610507B11Rik	1.83736	0.0355486	0.188423	0.937429	11.51	0.4451	0.000343539	0.05	0.509047	0.0196977	0.607683	0.952992	1.40521	0.0543748	0.2656	0.928915	0.00921419	0.0134691	0.0502763	-0.0100394	-0.0189849	0.0330928	-0.0145122	0.00246837	0.0156457
	Tmem11	1.83615	0.063116	0.188563	0.93748	0.147093	0.0101991	0.864019	0.986708	1.24961	0.0859085	0.305358	0.896219	0.731079	0.0502603	0.492244	0.96136	0.0319893	-0.0264956	0.0827331	0.0370099	0.0316884	0.0303345	0.0343492	0.00686999	0.0572108
	Slc2a1	2.50119	0.384728	0.18892	0.937712	NA	NA	NA	NA	NA	NA	NA	NA	NA	NA	NA	NA	0.0856074	NA	NA	NA	NA	0.0894536	NA	NA	NA
	Fas	1.82967	0.0558155	0.189315	0.937892	0.544237	0.0311306	0.587575	0.950679	3.29078	0.200775	0.0553515	0.600442	0.140543	0.00857474	0.869627	0.996222	0.0228005	0.0438492	0.00643415	0.046144	-0.00615743	0.026999	0.0199933	0.0444979	0.000138359
	Hebp2	1.90729	0.0897784	0.188913	0.938387	2.16453	0.194537	0.151676	0.748422	0.10786	0.0101542	0.898492	0.988665	0.396168	0.0372962	0.680203	0.975014	0.1892	0.245283	0.121715	0.106853	0.347901	0.171346	0.231358	0.104005	0.260559
	Nras	1.84159	0.0600539	0.189884	0.938635	1.34195	0.0954121	0.283873	0.829106	2.86863	0.187091	0.080293	0.687119	0.201437	0.0131377	0.819193	0.99315	0.12451	-0.079016	0.0184256	0.122616	0.457903	-0.0140776	0.29122	0.0216288	0.201161
	Snx30	3.846	0.657886	0.188899	0.939144	NA	NA	NA	NA	NA	NA	NA	NA	NA	NA	NA	NA	0.0934524	NA	NA	NA	NA	0.0934524	NA	NA	NA
	Calm1	1.82041	0.0603078	0.190398	0.939231	0.194	0.00866525	0.824992	0.980519	2.14116	0.141868	0.140357	0.772103	0.347292	0.0230107	0.71024	0.984416	-0.0165831	-0.0271017	-0.00598717	-0.0442504	0.00921598	-0.0150601	-0.0175172	-0.0372551	0.0016144
	Zkscan5	1.81889	0.0620918	0.190576	0.93928	0.913648	0.0619735	0.415128	0.880994	0.183345	0.0125178	0.833685	0.979104	1.14038	0.0778583	0.33712	0.931371	0.0515405	0.157568	0.034623	-0.0416873	0.0617316	0.0939377	0.0100222	0.05353	0.0481773
	Nrcam	1.89617	0.115491	0.190128	0.939486	0.261079	0.0318034	0.773888	0.975284	NA	NA	NA	NA	NA	NA	NA	NA	-0.159572	-0.0741268	-0.149538	-0.245231	NA	-0.137166	-0.245231	-0.150917	-0.149538
	Znf41-ps	2.08699	0.229668	0.191789	0.939746	NA	NA	NA	NA	NA	NA	NA	NA	NA	NA	NA	NA	0.258693	NA	0.0184572	NA	NA	0.00411165	NA	NA	0.221564
	Ift46	1.82042	0.0619947	0.190397	0.939984	0.57906	0.0398956	0.568387	0.941813	1.42774	0.0972442	0.260323	0.861706	0.265044	0.0180522	0.769483	0.993077	0.0602279	0.0446308	0.171746	-0.0106724	0.0424363	0.106643	0.0158819	0.0141084	0.107091
	2410127L17Rik	1.80875	0.0498748	0.191771	0.940414	3.03545	0.168064	0.0676236	0.604795	0.0354049	0.00195252	0.965267	0.998004	2.6577	0.146568	0.0915393	0.90334	-0.0350801	-0.0301633	-0.153322	-0.0357792	0.081887	-0.0956522	0.0230539	-0.0347853	-0.0357176
	Gm22748	1.80646	0.0655839	0.192042	0.940508	0.855399	0.0601813	0.4382	0.898966	0.279164	0.0202702	0.758942	0.972902	0.234354	0.0170165	0.792947	0.993132	-0.0517631	-0.057342	-0.0629925	0.00357075	-0.0972912	-0.0604644	-0.0468602	-0.0218957	-0.0801419
	Spred2	1.82075	0.0592442	0.190358	0.940577	0.146751	0.0132622	0.864311	0.986867	1.10573	0.0719571	0.347931	0.907292	1.70365	0.110868	0.204194	0.928883	0.0462586	0.00926823	0.0318321	-0.00514102	0.131153	0.0278923	0.063006	0.00626554	0.0814926
	Tmem198b	1.81558	0.064715	0.190966	0.940767	0.485808	0.0345623	0.621371	0.954202	0.997675	0.0711229	0.38414	0.920815	0.136207	0.00971004	0.87336	0.99654	0.031485	0.0125041	0.0196071	0.024368	0.0720632	0.0146505	0.0482156	0.0181821	0.0458351
	Pepd	1.80905	0.0427051	0.191735	0.941162	6.03207	0.271963	0.00783326	0.264029	0.792627	0.037422	0.464634	0.924937	1.95153	0.0921369	0.164874	0.929668	0.0180853	0.0105425	0.0484585	0.00910123	0.00339223	0.0338523	0.00624673	0.00847109	0.0259254
	Mall	2.26875	0.312124	0.192356	0.941508	NA	NA	NA	NA	NA	NA	NA	NA	NA	NA	NA	NA	0.309301	NA	NA	NA	NA	0.441176	NA	NA	0.332298
	Thy1	1.82005	0.051355	0.191676	0.941673	0.0279963	0.0030999	0.972428	0.998252	5.58666	0.31527	0.0113396	0.377397	0.695561	0.0392523	0.509925	0.96221	-0.0457735	-0.000167843	-0.0813327	0.0335853	-0.137256	-0.0379184	-0.0518355	0.0250388	-0.109294
	Zeb1	1.81037	0.0607832	0.19158	0.941707	0.560288	0.0388313	0.578645	0.947267	1.43322	0.0962406	0.25906	0.861062	0.493328	0.033127	0.616905	0.973956	0.0283412	0.0174165	0.0215703	0.0486198	0.0341987	0.0155967	0.0414093	0.031276	0.0278845
	March3	1.80096	0.0673159	0.192696	0.941918	0.404475	0.0308271	0.671982	0.970499	0.0828133	0.00619076	0.920796	0.992578	0.489153	0.0365669	0.619381	0.973605	-0.0637556	-0.11788	-0.0868467	0.00224449	-0.0594234	-0.102897	-0.0285895	-0.0548081	-0.0731351
	Kbtbd4	1.86164	0.0815225	0.19132	0.942013	0.889121	0.0778703	0.430377	0.893962	0.497284	0.0435527	0.617275	0.954509	1.10074	0.0964045	0.356537	0.934598	-0.0914308	-0.153661	0.0534041	-0.0425813	-0.220442	-0.0346244	-0.148237	-0.0981211	-0.0835191
	Kat5	1.82166	0.0624534	0.191486	0.942059	2.24551	0.156222	0.130689	0.728498	0.256871	0.017613	0.775863	0.977656	0.670989	0.046008	0.521826	0.964148	-0.0821062	-0.118048	-0.287736	-0.0159274	0.0988409	-0.215013	0.0428564	-0.0635923	-0.0944476
	Reep5	1.7991	0.0618062	0.192917	0.942359	0.178606	0.0111354	0.837584	0.982892	0.51938	0.0356856	0.601702	0.951053	1.45681	0.100095	0.253685	0.928089	0.0231318	0.0394736	0.000196728	-0.00694855	0.0595442	0.0204224	0.0262978	0.0147935	0.0298704
	Alox15	1.95119	0.117533	0.192683	0.942585	2.32502	0.280102	0.148186	0.744669	NA	NA	NA	NA	NA	NA	NA	NA	-0.169072	NA	NA	0.0930362	-0.231109	-0.403721	-0.092455	0.0743178	-0.351615
	Mtmr4	1.80466	0.0686876	0.193488	0.945016	0.328758	0.0161882	0.723456	0.976005	0.768836	0.0585258	0.476165	0.930149	0.636781	0.0484734	0.538903	0.965762	-0.0881456	-0.142775	-0.141494	0.0989768	-0.179565	-0.147391	-0.0402941	0.00408903	-0.160529
	Nf1	1.78833	0.0647116	0.194206	0.945032	0.152041	0.00700325	0.859809	0.985451	1.23264	0.0892076	0.310071	0.899512	0.0388444	0.00281121	0.961963	1.00062	-0.086227	-0.136942	-0.0086059	-0.16558	-0.0508121	-0.0608539	-0.108196	-0.15254	-0.029709
	Parp11	1.87854	0.0947426	0.193702	0.945217	2.47465	0.249614	0.122835	0.719022	NA	NA	NA	NA	NA	NA	NA	NA	-0.169587	-0.315789	0.0849359	NA	-0.145765	-0.132583	-0.242392	-0.349418	-0.0202107
	Sdccag8	1.62472	0.0552234	0.215162	0.945294	1.15969	0.0726528	0.331253	0.860627	0.493233	0.0335295	0.616961	0.954952	0.745151	0.0506546	0.485778	0.96125	-0.0812561	-0.180814	0.0481181	-0.110109	-0.0959973	-0.0514356	-0.103053	-0.144953	-0.0239396
	Baz1b	2.24788	0.310143	0.19408	0.945383	NA	NA	NA	NA	NA	NA	NA	NA	NA	NA	NA	NA	-0.207732	NA	NA	NA	NA	NA	-0.25537	NA	-0.296651
	Gm25315	2.24788	0.310143	0.19408	0.945383	NA	NA	NA	NA	NA	NA	NA	NA	NA	NA	NA	NA	-0.207732	NA	NA	NA	NA	NA	-0.25537	NA	-0.296651
	Zfp292	1.78706	0.0643959	0.194358	0.94539	0.0356994	0.00232348	0.964984	0.996714	0.53304	0.0384156	0.593894	0.949009	0.913318	0.065822	0.415255	0.936294	-0.0349536	-0.0477331	-0.017204	-0.0697717	-0.00883208	-0.0299362	-0.0393019	-0.0573797	-0.013018
	Dap	1.76122	0.0602524	0.197498	0.945419	1.14377	0.0709688	0.336082	0.864584	0.698351	0.0477822	0.507647	0.931851	0.392587	0.0268613	0.679747	0.975264	0.0164041	-0.00455985	0.0443549	0.00956648	0.0145991	0.0222768	0.0120828	0.00188034	0.029477
	Kif16b	1.62251	0.0486623	0.215464	0.945442	2.73506	0.164264	0.0859788	0.661337	0.064171	0.00384922	0.938012	0.994575	1.56068	0.0936155	0.231429	0.932089	-0.0615851	-0.226879	-0.0486767	0.0922401	-0.0713533	-0.132706	0.0104434	-0.0621052	-0.060015
	Furin	1.76014	0.0527356	0.19763	0.945462	1.52365	0.085979	0.23911	0.818371	0.805651	0.0482764	0.45901	0.920254	1.97894	0.118582	0.161059	0.93787	0.0212136	-0.0350378	0.039056	0.0629824	0.010316	0.00313235	0.0366492	0.0189574	0.024686
	Ak2	1.76167	0.0400507	0.197442	0.945765	8.42401	0.389693	0.00179967	0.106667	0.626947	0.0285067	0.543104	0.938165	0.56117	0.0255159	0.578158	0.971686	0.00656211	0.00528079	0.00814816	0.00929661	0.00599621	0.00680206	0.00764641	0.0063495	0.00707219
	Gm20529	1.63381	0.0565209	0.215124	0.945963	3.13629	0.216996	0.0642949	0.582982	NA	NA	NA	NA	NA	NA	NA	NA	-0.0986951	NA	-0.309544	-0.0174288	-0.00695634	-0.225487	-0.0129406	0.0103006	-0.180955
	Gmppb	1.63381	0.0565209	0.215124	0.945963	3.13629	0.216996	0.0642949	0.582982	NA	NA	NA	NA	NA	NA	NA	NA	-0.0986951	NA	-0.309544	-0.0174288	-0.00695634	-0.225487	-0.0129406	0.0103006	-0.180955
	Agmo	1.62252	0.0581519	0.215463	0.94611	0.52581	0.0374737	0.598012	0.952864	0.0378777	0.00271511	0.962891	0.99703	1.07578	0.0771129	0.35758	0.935959	0.0223145	0.0530161	0.0216288	-0.0172669	0.0326133	0.0372975	0.00767323	0.0171322	0.0271211
	Jmjd1c	1.75628	0.0579147	0.198104	0.946166	1.57772	0.104592	0.227985	0.809669	0.318747	0.0210219	0.73022	0.969551	0.888024	0.0585666	0.42511	0.936508	0.0142648	-0.002812	0.0368211	0.020649	0.00308723	0.0181357	0.0118681	0.00860508	0.0199542
	Cib2	1.75779	0.0529741	0.197918	0.946202	3.48323	0.211225	0.047705	0.546396	0.663181	0.0399722	0.524787	0.93358	0.0657347	0.00396206	0.936554	1.00316	-0.0242867	-0.051228	-0.0461139	-0.00332544	0.00877537	-0.0504362	0.00272497	-0.0289157	-0.0186693
	Ap1ar	1.76207	0.0651789	0.197393	0.946423	0.415313	0.0315017	0.664986	0.96728	0.456801	0.0337942	0.638929	0.95353	0.264018	0.0195321	0.770256	0.992479	0.0448009	0.0538967	-0.026884	0.0673175	0.0816405	0.0129278	0.074479	0.0616085	0.0273783
	Gpr81	1.61221	0.0574049	0.216879	0.946489	0.171046	0.0104027	0.843845	0.983456	1.54567	0.110072	0.234509	0.844658	0.0196025	0.00139595	0.980605	1.0029	0.0154912	0.0223631	0.0199961	0.00506312	0.0123947	0.0226213	0.0087289	0.0132463	0.0161954
	Egfr	1.77842	0.0557395	0.195401	0.946546	1.17937	0.0740814	0.325387	0.850115	0.65282	0.0409215	0.529955	0.935829	1.73159	0.108543	0.199291	0.921627	-0.0202301	-0.0470998	-0.0338092	0.00207537	-0.00973311	-0.0366593	-0.00382887	-0.0197722	-0.0217712
	Gm5617	1.7496	0.0457917	0.198929	0.946605	0.781299	0.0409057	0.469586	0.914295	3.92177	0.205287	0.0342358	0.553115	2.026	0.106052	0.154732	0.937995	-0.0374709	0.110766	-0.119428	-0.0648806	-0.0660614	-0.00894785	-0.065471	0.0178153	-0.0927447
	Klhl11	1.75237	0.0483456	0.198587	0.946677	0.157713	0.011403	0.85501	0.98541	2.60009	0.143466	0.0959339	0.732292	2.98938	0.164946	0.070138	0.904384	0.0524192	-0.0667602	0.0990235	-0.030564	0.178042	0.0298327	0.0737392	-0.0402256	0.138533
	Tspan15	1.76291	0.0513977	0.19729	0.946693	1.78669	0.108465	0.18999	0.781683	0.714417	0.0416577	0.500021	0.933659	2.26715	0.132198	0.126275	0.89291	-0.0265561	0.0217863	-0.00305959	-0.0193879	-0.0914261	0.00588851	-0.055407	-0.00495644	-0.0472429
	Slc27a2	2.37817	0.44219	0.220711	0.946699	NA	NA	NA	NA	NA	NA	NA	NA	NA	NA	NA	NA	0.386306	NA	NA	NA	NA	NA	NA	NA	NA
	Mapre2	1.75041	0.0576602	0.198829	0.946795	1.94044	0.126598	0.166444	0.76597	0.623513	0.0410783	0.544876	0.937722	0.239495	0.0157784	0.788963	0.992293	0.0228916	-0.0285269	0.0293262	0.0330469	0.052576	0.00347312	0.0428115	0.00317237	0.0409511
	Bpnt1	1.6108	0.0390395	0.217074	0.946877	5.40096	0.261803	0.0119411	0.30765	0.806057	0.0390714	0.458836	0.920522	2.11794	0.102661	0.143134	0.930975	0.010643	0.0226638	0.0326288	0.00138551	-0.01862	0.029916	-0.00861725	0.0138449	0.0070044
	Gpatch3	1.60835	0.0526015	0.217411	0.946952	2.23246	0.14803	0.129993	0.729637	0.0762114	0.00498503	0.926853	0.994436	0.675216	0.0441662	0.518852	0.963141	0.0616101	0.0908965	0.164086	0.0452425	-0.0310395	0.125802	0.0071015	0.057308	0.0665234
	Wrn	1.78317	0.0640487	0.194827	0.946971	0.166632	0.0131063	0.847524	0.984482	0.180223	0.0129466	0.836252	0.979333	1.18201	0.0849117	0.32461	0.9277	-0.0341813	0.000681276	-0.0681193	-0.0493951	-0.0155039	-0.0350198	-0.0324495	-0.0251702	-0.0418116
	Slc35f5	1.61246	0.0467154	0.216844	0.947013	1.95584	0.11215	0.164268	0.762712	0.0970572	0.00562379	0.907874	0.989199	2.89922	0.167989	0.0753576	0.915167	-0.0163392	-0.0470069	-0.0206984	0.0221662	-0.0234688	-0.034463	-0.000651272	-0.0103295	-0.0220836
	Gm5428	1.80451	Inf	0.19914	0.947032	1.07143	Inf	0.367333	0.873443	NA	NA	NA	NA	NA	NA	NA	NA	0	0	0	0	NA	0	0	0	0
	Ttc38	1.78408	0.0503958	0.194717	0.947087	1.83063	0.0987867	0.182912	0.774327	0.925911	0.0523093	0.410441	0.912155	2.55211	0.144181	0.0997696	0.898113	-0.0276249	-0.0687871	0.0810099	-0.0477068	-0.0821405	0.0116325	-0.0649236	-0.0571667	-0.000565292
	H2afy	1.75289	0.0505204	0.198522	0.9471	1.12261	0.0671665	0.342617	0.869176	1.49196	0.0860001	0.245905	0.850294	2.35731	0.135881	0.117143	0.89744	-0.0237006	-0.011148	0.0147147	0.0152779	-0.114441	0.00409387	-0.0495813	0.00329635	-0.0498629
	Npm1	1.6071	0.055543	0.217584	0.947129	0.842138	0.0562065	0.443645	0.902006	0.560786	0.0387626	0.57837	0.949567	0.760726	0.0525828	0.478728	0.957744	-0.0104849	-0.0272202	-0.00228984	-0.0105444	-0.00185513	-0.0143905	-0.00619977	-0.0196324	-0.00207249
	Prrg2	1.69999	0.0575937	0.205188	0.947164	1.90454	0.127001	0.171644	0.770416	0.0342785	0.00232262	0.966352	0.99793	0.469693	0.0318252	0.63106	0.973687	-0.0307405	-0.0108023	0.027093	-0.0638586	-0.0724486	0.0109735	-0.0681536	-0.0394614	-0.0226778
	Mff	1.7808	0.0476403	0.195113	0.94717	3.31866	0.187956	0.0541656	0.572746	1.51419	0.0810158	0.241117	0.850434	1.46682	0.0784811	0.251444	0.934818	0.00671722	0.0119414	0.0152663	0.00130919	0.000470103	0.0137396	0.000889646	0.00604553	0.00786821
	Sult5a1	1.8332	0.0764146	0.202913	0.947205	5.57846	0.465063	0.0212499	0.4	NA	NA	NA	NA	NA	NA	NA	NA	-0.0830764	NA	-0.25	NA	0.0566893	-0.286325	0.042517	NA	-0.0716553
	Heatr6	1.71512	0.0577689	0.203254	0.94721	0.936046	0.0630153	0.406611	0.877713	1.36668	0.0920648	0.274892	0.879808	0.184423	0.0124235	0.832802	0.994815	-0.0278362	-0.00854182	-0.00535769	-0.0325633	-0.0619622	-0.008522	-0.0472627	-0.0192198	-0.0336599
	Arsg	1.80136	0.080653	0.195367	0.947211	0.766669	0.0686527	0.478403	0.916571	NA	NA	NA	NA	NA	NA	NA	NA	-0.124574	NA	0.0399902	-0.0838424	-0.259567	-0.0169379	-0.185771	-0.109992	-0.132186
	4930423O20Rik	1.74174	0.0650318	0.201827	0.947229	1.49363	0.110014	0.248557	0.816274	1.00365	0.0749473	0.384266	0.920496	0.0232602	0.00173695	0.977035	1.00275	0.0598124	0.149649	0.0311029	0.0638639	-0.0317951	0.0967576	0.0228672	0.109045	-0.0023018
	Ankrd52	1.76308	0.0587121	0.197269	0.947274	0.401974	0.0274439	0.673607	0.970279	0.88842	0.0591704	0.424954	0.912466	1.34268	0.089425	0.280857	0.932464	-0.0409118	-0.0132843	-0.108329	-0.0383741	0.00230145	-0.064379	-0.0180363	-0.030659	-0.0530139
	Asun	1.62507	0.0409124	0.215115	0.947305	3.02093	0.152495	0.0684051	0.609386	0.0853754	0.00429878	0.918457	0.992017	4.44152	0.223637	0.0233848	0.935455	-0.0353134	0.0283032	0.0453116	-0.0659429	-0.132611	0.031942	-0.0992769	-0.0268652	-0.0436497
	Fancg	1.58487	0.0564953	0.220689	0.94735	0.363907	0.0259821	0.698886	0.973277	0.0981472	0.00699726	0.906893	0.988785	1.27203	0.0906875	0.299251	0.931037	0.0343773	0.0335009	0.012468	0.0558262	0.045256	0.0182193	0.0505411	0.0410071	0.028862
	Cyba	1.58749	0.0552487	0.22032	0.947379	0.771101	0.0554928	0.474094	0.914848	0.625718	0.0435531	0.543738	0.938161	0.676201	0.0470671	0.518369	0.963116	-0.0176407	-0.000645832	-0.000537518	-0.00357274	-0.063885	-0.000792503	-0.0337289	-0.00226195	-0.0322113
	Ugcg	1.75349	0.0512396	0.198448	0.947446	2.95229	0.175555	0.0722362	0.626281	1.3476	0.0787578	0.279622	0.882889	0.434078	0.0253688	0.65306	0.975063	0.0289039	0.0620155	0.0509464	-0.0247927	0.023598	0.0574438	-0.000597354	0.0176068	0.0372722
	Nt5e	1.72321	0.0398103	0.20281	0.947468	2.1799	0.114885	0.136863	0.730069	7.29752	0.337181	0.00370684	0.249315	0.303736	0.0140341	0.741101	0.987938	0.0599542	0.266388	0.0814366	0.007956	-0.0643553	0.160702	-0.0281997	0.118713	0.00854062
	BC043934	1.67437	0.055653	0.216614	0.947502	2.8375	0.191231	0.0923619	0.668486	1.26518	0.0841049	0.312549	0.898657	3.10307	0.206281	0.0766503	0.905237	-0.0972484	0.298511	-0.165568	-0.319852	-0.126573	0.0664716	-0.206993	-0.0704512	-0.14864
	Slc7a5	1.58538	0.0346851	0.220617	0.947521	1.00704	0.0513467	0.380843	0.879968	4.78388	0.209324	0.0183151	0.454822	4.77033	0.208731	0.0184913	0.888889	-0.0433375	-0.0721691	-0.00686732	0.0580745	-0.124835	-0.0506846	-0.0333803	-0.0122305	-0.0658512
	Luc7l2	1.7731	0.0598071	0.196046	0.947533	0.47736	0.0384003	0.62643	0.953602	1.64882	0.11123	0.214204	0.832618	0.310778	0.0209652	0.735906	0.987487	-0.0434174	-0.155607	0.000159486	-0.0575362	0.0242388	-0.0731219	-0.0166487	-0.103008	0.0121992
	Acacb	1.6131	0.0591597	0.216756	0.947539	0.378881	0.0278893	0.688821	0.972716	0.0124247	0.000911343	0.987659	0.999013	0.935584	0.0686242	0.406784	0.934743	-0.0207833	-0.0293241	-0.0378569	-0.00730272	-0.0067828	-0.0353996	-0.00704276	-0.0192683	-0.0223198
	Tfdp1	1.60853	0.0466456	0.217386	0.947546	0.0564237	0.0041326	0.945269	0.992871	4.59894	0.266728	0.0208861	0.470909	0.282434	0.0163805	0.756524	0.991586	-0.0258529	-0.019734	-0.0513814	-0.0197929	-0.0210646	-0.0313797	-0.0204288	-0.0189643	-0.036223
	Ppp4r1l-ps	1.71564	0.0570068	0.203189	0.947547	1.59226	0.105854	0.22509	0.804808	0.550832	0.0366059	0.583888	0.94886	0.546727	0.0363331	0.58618	0.973277	-0.0380783	0.0227033	-0.027009	-0.0447405	-0.102538	-0.00259189	-0.0736393	-0.0086463	-0.0647735
	Abca9	1.62552	0.0438684	0.215054	0.947622	3.42131	0.19226	0.0500318	0.544421	2.32545	0.125515	0.120286	0.756933	0.467715	0.0252448	0.63226	0.974681	-0.0289989	-0.0480135	0.019847	-0.044382	-0.0586198	-0.0087259	-0.0515009	-0.0424845	-0.0193864
	Dcaf6	2.28084	0.363142	0.205498	0.947651	NA	NA	NA	NA	NA	NA	NA	NA	NA	NA	NA	NA	-0.373183	NA	NA	NA	NA	-0.542051	NA	NA	NA
	Ppp4r1	1.58792	0.0566462	0.220259	0.947757	0.616819	0.0452813	0.548348	0.934819	0.391516	0.0279332	0.680452	0.964769	0.713845	0.0509302	0.500291	0.960136	-0.054798	-0.164862	-0.0478382	0.0195742	-0.0465989	-0.0973705	-0.0135124	-0.0654388	-0.0472185
	Aplnr	1.76672	0.0658074	0.196824	0.947775	0.338688	0.0254223	0.716199	0.975081	0.0349026	0.00260014	0.96575	0.998024	0.666439	0.0496476	0.523173	0.964795	-0.0339377	-0.0589655	-0.0190501	0.0029081	-0.0599174	-0.0383472	-0.0285046	-0.0282195	-0.0394837
	Tbl3	1.76331	0.0527257	0.19724	0.947779	1.07713	0.067173	0.357139	0.871635	2.4744	0.147976	0.10634	0.742995	0.788413	0.0471494	0.46647	0.954705	-0.0350358	-0.099221	-0.0396218	-0.085315	0.081556	-0.0692349	-0.00187949	-0.0945342	0.0209671
	E2f1	1.72667	0.0641796	0.201792	0.947796	0.247951	0.0141429	0.782457	0.976045	0.746791	0.0555158	0.48503	0.933912	0.0938002	0.00697302	0.910811	0.998595	0.127698	0.05942	0.267506	0.0459499	0.117753	0.180115	0.0818514	0.0511507	0.192629
	Lamc1	1.70006	0.0459674	0.20518	0.947872	2.26591	0.120732	0.126406	0.725772	3.52306	0.190518	0.0462703	0.580407	0.352987	0.0190887	0.706326	0.984154	-0.00636062	-0.00575211	0.00686556	-0.0126834	-0.0162779	0.00189739	-0.0144807	-0.00901966	-0.00470618
	Slc6a13	1.5855	0.0570187	0.2206	0.947967	0.0765299	0.00524527	0.92656	0.989301	0.17854	0.0128415	0.837639	0.979212	1.35553	0.0974966	0.277646	0.931053	-0.0233169	0.00219454	-0.0343115	-0.0226139	-0.0310228	-0.0200073	-0.0268183	-0.0129346	-0.0326671
	Efcc1	1.73676	0.0809663	0.204077	0.94797	0.856844	0.0798905	0.441105	0.901813	NA	NA	NA	NA	NA	NA	NA	NA	-0.115677	NA	-0.129185	NA	-0.0965912	-0.165025	-0.0663295	-0.165469	-0.112888
	Axin1	1.61475	0.0541706	0.216528	0.947992	1.80391	0.129657	0.187182	0.778868	0.737255	0.0494658	0.489395	0.935865	0.0557952	0.00374356	0.94586	1.00132	0.0351939	-0.0085981	0.036282	0.00897371	0.0899594	0.0164505	0.0494666	0.00465015	0.0631207
	Masp2	3.4878	0.635555	0.202783	0.948033	NA	NA	NA	NA	NA	NA	NA	NA	NA	NA	NA	NA	0.056827	NA	NA	NA	NA	NA	NA	NA	NA
	Arf6	1.71959	0.0554265	0.202686	0.94807	1.44708	0.105463	0.255888	0.818786	1.31268	0.0846213	0.288513	0.882464	0.392833	0.0253238	0.679585	0.975284	-0.0220968	0.00711376	-0.0138331	-0.00547144	-0.0650482	-0.00628393	-0.0352598	-0.00232819	-0.0394407
	Mir152	1.6184	0.0544804	0.216598	0.948099	0.458277	0.0280514	0.638274	0.959985	0.234338	0.0157771	0.793044	0.975297	2.3512	0.158298	0.11874	0.891379	-0.0658171	0.0015199	-0.146233	-0.0929844	-0.061335	-0.0528542	-0.0771597	-0.038633	-0.0963997
	Pik3ca	1.77323	0.0671655	0.196031	0.948119	0.0690312	0.00445879	0.93349	0.990372	0.331748	0.0251316	0.721045	0.971056	0.413054	0.0312909	0.666437	0.976677	-0.0245218	-0.00260287	-0.0424952	-0.0206686	-0.0311834	-0.0234824	-0.025926	-0.0107783	-0.0368393
	Cul4a	1.62574	0.0543113	0.215024	0.948153	1.47268	0.104963	0.25014	0.818065	1.07011	0.0714986	0.35944	0.907925	0.111193	0.00742929	0.895244	0.997297	-0.00963048	-0.0225718	-0.00243066	-0.0199634	0.00352773	-0.0120299	-0.00821782	-0.0204871	0.000548533
	Gm9752	1.63668	0.0494234	0.213537	0.948175	1.23245	0.0801414	0.310125	0.848527	2.36252	0.142683	0.116638	0.761146	0.644484	0.0389233	0.534153	0.964698	-0.0295774	-0.0844411	-0.0339975	-0.0726815	0.0626198	-0.0576086	-0.00503088	-0.0751727	0.0143111
	Lcorl	1.59294	0.0442858	0.220123	0.948204	0.761579	0.0493499	0.478848	0.916523	1.47892	0.0822319	0.249673	0.851094	3.94781	0.219508	0.0342741	0.95509	0.0434027	0.0217103	-0.0187278	-0.0125919	0.177797	-0.00139718	0.0826027	0.00210909	0.0795347
	Anks6	2.10311	0.239556	0.197186	0.948206	NA	NA	NA	NA	0.338059	0.0770134	0.725908	0.971316	NA	NA	NA	NA	0.168025	NA	NA	NA	0.0830808	NA	0.236415	0.236729	0.0993201
	Bcl7c	3.43345	0.63191	0.205072	0.948281	NA	NA	NA	NA	NA	NA	NA	NA	NA	NA	NA	NA	0.0688064	NA	NA	NA	NA	NA	NA	NA	0.0688064
	Yrdc	1.70173	0.0529099	0.204965	0.948317	0.989275	0.0731725	0.387121	0.880646	2.28086	0.141832	0.124838	0.756991	0.460417	0.0286304	0.636711	0.974102	-0.0432398	0.0352624	-0.0640362	-0.0427098	-0.072806	-0.0246726	-0.0577579	-0.0119977	-0.0684211
	Zfp74	1.72077	0.0650075	0.202537	0.948333	0.0780682	0.00523854	0.925145	0.990377	0.615294	0.0464894	0.549142	0.939206	0.181411	0.0137067	0.835275	0.995484	-0.0334385	-0.0317624	-0.0261832	-0.0109337	-0.0669367	-0.0269885	-0.0389352	-0.0211409	-0.0465599
	Tbcel	1.71086	0.0483975	0.203796	0.948343	1.83032	0.104026	0.182961	0.774194	0.939109	0.0531318	0.40546	0.909447	2.55022	0.144283	0.099924	0.897928	0.0487	0.224276	-0.0124522	-0.0189471	0.0120632	0.101223	-0.00344195	0.100621	-0.000194492
	Xpa	1.73992	0.0688879	0.200131	0.94835	0.133694	0.0101364	0.875532	0.988878	0.0283842	0.0022476	0.972049	0.998113	0.0966279	0.00765147	0.90826	0.998886	-0.0803349	-0.105707	-0.0408532	-0.0882386	-0.0891247	-0.0693214	-0.0886817	-0.0968083	-0.064989
	Armc8	1.76762	0.0650393	0.196714	0.948359	0.242356	0.0178002	0.786756	0.977346	0.0687163	0.00505682	0.933782	0.995566	0.893956	0.0657861	0.422776	0.934702	-0.0267263	-0.0464187	-0.031119	-0.00850699	-0.0266979	-0.0357656	-0.0176024	-0.0248859	-0.0289084
	Scfd1	1.72686	0.0618903	0.201769	0.948365	0.798887	0.057302	0.461922	0.913775	0.168662	0.0120897	0.84583	0.979935	0.619979	0.0444399	0.546706	0.969608	-0.0151131	-0.0442814	-0.0100384	0.00177827	-0.0119021	-0.0251555	-0.00506194	-0.0198946	-0.0109703
	Gm13680	1.72369	0.0627466	0.202168	0.948407	0.374473	0.0284936	0.691768	0.972691	0.817743	0.0595356	0.453855	0.923328	0.181292	0.0131989	0.835372	0.995124	0.0093025	0.01568	0.00650097	0.00529475	0.00828722	0.0116037	0.00679099	0.0107386	0.00739409
	Rab3d	1.65599	0.0724029	0.216453	0.948519	1.18969	0.0995078	0.329849	0.858417	0.314376	0.0274902	0.734654	0.970376	1.10388	0.0965272	0.355556	0.938164	-0.0768353	0.151515	-0.148649	-0.178127	-0.11	0.0314496	-0.155418	-0.0368516	-0.129324
	Fads6	1.71852	0.0617149	0.204039	0.948533	0.546231	0.0411004	0.587137	0.95038	1.23403	0.0886321	0.311381	0.899137	0.783543	0.0562766	0.469689	0.95858	0.0788285	-0.0164068	0.0712012	-0.00717747	0.225966	0.0310634	0.126973	0.00502276	0.143976
	Ing4	1.61741	0.0572055	0.216163	0.948588	0.880071	0.0613813	0.428262	0.893406	0.831608	0.0588256	0.448021	0.919792	0.116451	0.00823745	0.890595	0.996453	0.0225301	0.0362021	0.0372938	0.0123192	0.00551378	0.0357829	0.00891647	0.0253211	0.0214038
	Dgke	1.72113	0.0572077	0.202491	0.948673	1.07084	0.0721896	0.359201	0.87372	0.528995	0.0351659	0.596194	0.949274	1.08246	0.0719582	0.355404	0.938338	0.0215808	0.00423966	0.0207072	0.0234743	0.0371875	0.0137675	0.0303309	0.0147305	0.0289473
	Hdgf	1.76835	0.046436	0.196625	0.94871	1.58352	0.0766629	0.226826	0.808307	0.994223	0.0522156	0.385362	0.921555	4.0788	0.214215	0.0304708	0.925166	-0.0119677	-0.0428754	0.0250765	-0.00714515	-0.0234678	-0.00731888	-0.0153065	-0.0257997	0.00080434
	Gm12005	1.875	Inf	0.219944	0.948755	NA	NA	NA	NA	NA	NA	NA	NA	NA	NA	NA	NA	0	NA	NA	NA	NA	0	NA	0	NA
	Hist1h2ad	1.875	Inf	0.219944	0.948755	NA	NA	NA	NA	NA	NA	NA	NA	NA	NA	NA	NA	0	NA	NA	NA	NA	0	NA	0	NA
	n-R5s185	1.875	Inf	0.219944	0.948755	NA	NA	NA	NA	NA	NA	NA	NA	NA	NA	NA	NA	0	NA	0	NA	NA	0	NA	NA	0
	Tmem38b	1.875	Inf	0.219944	0.948755	NA	NA	NA	NA	NA	NA	NA	NA	NA	NA	NA	NA	0	NA	0	NA	NA	0	NA	NA	0
	Prkcdbp	1.6268	0.0457475	0.214878	0.948791	4.52075	0.26057	0.0220889	0.402222	0.280269	0.0157629	0.758124	0.972503	0.665852	0.0374489	0.523463	0.965014	0.0177387	-0.0192371	0.0210446	0.0390908	0.0178443	0.00348606	0.0284675	0.0153722	0.0194445
	Rxrb	1.62582	0.0468954	0.215013	0.948827	0.485229	0.0290526	0.621717	0.953693	0.251839	0.0145282	0.779486	0.977708	4.28454	0.247168	0.0262035	0.976033	-0.0424653	0.082959	-0.0910492	-0.168619	0.024106	-0.0098392	-0.0722567	-0.0506452	-0.0334716
	Mrgprg	1.91548	0.193181	0.20374	0.948832	NA	NA	NA	NA	NA	NA	NA	NA	NA	NA	NA	NA	-0.230464	NA	-0.301866	NA	NA	-0.270302	NA	NA	-0.242809
	Slc4a8	1.94234	0.217207	0.206062	0.948846	NA	NA	NA	NA	NA	NA	NA	NA	NA	NA	NA	NA	-0.0798707	NA	NA	NA	-0.0573654	NA	-0.0158643	NA	-0.111931
	Gm1821	1.74024	0.0616434	0.200092	0.948848	0.669287	0.0456017	0.521766	0.928763	0.483033	0.0342203	0.623028	0.956345	0.592927	0.0420058	0.560936	0.965968	0.0110241	-0.00409365	0.00560339	0.0206399	0.0199554	0.00119679	0.0202977	0.00971594	0.0127794
	Dnalc1	2.03035	0.288798	0.213499	0.948854	NA	NA	NA	NA	NA	NA	NA	NA	NA	NA	NA	NA	0.0921995	NA	NA	NA	NA	NA	0.0660491	NA	0.158339
	Slfn2	1.58889	0.0481322	0.220123	0.94886	1.31522	0.073746	0.287857	0.832012	0.973097	0.0589559	0.392935	0.919836	1.92275	0.116492	0.168984	0.926029	-0.0315969	0.0212099	-0.0652624	-0.0417438	-0.0283716	-0.0306936	-0.0350577	-0.0130389	-0.046817
	Rplp0	1.77324	0.05011	0.196029	0.948863	4.19389	0.243021	0.0279977	0.466216	1.10557	0.0624845	0.347983	0.906997	0.00737752	0.000416963	0.992652	1.00302	0.00360889	0.00431101	0.00363731	0.00325506	0.00182364	0.00421566	0.00253935	0.00429084	0.00273048
	Pwwp2b	1.70307	0.0435406	0.204794	0.948914	1.89652	0.100737	0.17283	0.768982	1.52454	0.0779529	0.238922	0.845662	3.78464	0.193516	0.0379394	0.932258	-0.0594534	0.0639816	-0.103154	-0.186838	-0.00307759	-0.0270777	-0.0949577	-0.0715675	-0.0531156
	D630037F22Rik	1.58072	0.0387629	0.221275	0.948935	4.16996	0.211809	0.0284934	0.468333	1.60162	0.0785511	0.223247	0.838781	2.32763	0.114158	0.120068	0.888272	-0.0260936	-0.176853	-0.00883143	0.0367719	0.0250684	-0.0862906	0.0309201	-0.0627107	0.00811849
	Arhgap19	1.61548	0.0413613	0.216428	0.948977	4.67303	0.238481	0.0198119	0.384706	1.18176	0.0605136	0.324683	0.901348	1.36637	0.0699667	0.274966	0.936631	0.0323598	-0.0705473	0.0685239	0.0686033	0.0584901	0.00391334	0.0635467	0.000632124	0.063507
	Tbc1d30	1.80046	0.187938	0.221549	0.949005	0.389791	0.0813756	0.691029	0.972474	NA	NA	NA	NA	NA	NA	NA	NA	-0.18905	NA	-0.056575	NA	NA	-0.056575	-0.273719	NA	-0.183907
	Rpl13	1.72724	0.0624794	0.201721	0.949011	0.175019	0.0119697	0.840548	0.98352	0.475219	0.0343802	0.627719	0.955924	0.80861	0.0584997	0.457743	0.95396	0.00986105	0.00826142	0.0205015	0.000879043	0.0117201	0.0138393	0.00629959	0.00342761	0.0161108
	Dusp10	1.70176	0.0607909	0.204961	0.949027	0.585477	0.0398157	0.564926	0.940821	0.319165	0.0228027	0.729923	0.969757	0.741324	0.0529636	0.487527	0.961584	-0.0652585	-0.131807	0.0231983	-0.0732486	-0.0739648	-0.0526449	-0.0736067	-0.107454	-0.0253832
	Olfr558	1.59623	0.0682867	0.221722	0.94904	1.38959	0.118893	0.27338	0.825377	NA	NA	NA	NA	NA	NA	NA	NA	0.11764	NA	-0.198802	0.157496	0.235754	-0.0668101	0.197949	0.165684	0.07077
	Mll3	1.7065	0.0547311	0.204353	0.949061	1.65441	0.0972211	0.21316	0.795363	1.45108	0.0930787	0.254979	0.858249	0.131132	0.00841134	0.877753	0.995499	0.0251949	0.00927384	0.0223686	0.0407059	0.0253055	0.0144882	0.0330057	0.029019	0.023837
	Hist2h2ac	1.68236	0.0481209	0.207473	0.949076	1.8578	0.104413	0.178678	0.773213	3.07394	0.175849	0.0655979	0.64252	0.207599	0.011876	0.814039	0.994078	-0.0137391	0.0158192	-0.00701331	-0.00948868	-0.0524373	0.00536231	-0.030963	0.00192798	-0.0297253
	Gm21839	1.58275	0.0834716	0.228943	0.949104	1.6894	0.178192	0.22017	0.801636	NA	NA	NA	NA	NA	NA	NA	NA	-0.140154	-0.416667	NA	NA	0.015362	-0.318069	0.022605	-0.248572	-0.0780277
	Cbx7	2.11131	0.296895	0.205946	0.949106	NA	NA	NA	NA	NA	NA	NA	NA	NA	NA	NA	NA	0.246764	NA	NA	NA	NA	NA	0.0159951	NA	0.310867
	Swt1	1.59265	0.060159	0.219595	0.949167	0.324974	0.0274596	0.72581	0.976588	0.255161	0.0192763	0.776956	0.977757	0.360572	0.0272397	0.701149	0.984181	-0.0352025	-0.0109881	-0.0177418	-0.0286578	-0.0802561	-0.0138979	-0.0544569	-0.0196563	-0.048999
	Larp4b	1.57997	0.0581836	0.22138	0.949176	0.516966	0.0378496	0.603094	0.952334	0.156545	0.0115298	0.855996	0.982759	0.613979	0.0452204	0.549828	0.96903	0.0136943	0.00353759	0.00609795	0.0193229	0.0274735	0.00364549	0.0233982	0.0107529	0.0167857
	Mlx	1.6833	0.0609023	0.20735	0.949186	0.668911	0.043478	0.521952	0.928231	0.650232	0.0470513	0.531254	0.936207	0.158849	0.0114945	0.854053	0.997265	-0.0328115	-0.0354618	0.0227732	-0.0617808	-0.0601253	-0.00252118	-0.060953	-0.0497554	-0.018676
	Acsl3	1.74339	0.0518595	0.1997	0.949192	1.19459	0.0708664	0.320931	0.848138	0.341363	0.0203086	0.714341	0.968725	2.90111	0.172595	0.0752439	0.91701	-0.0715401	-0.0636782	-0.209015	-0.00461497	-0.0155597	-0.133464	-0.0100873	-0.0268923	-0.112287
	Gm6665	1.76867	0.0624456	0.196586	0.949218	0.433623	0.031274	0.653347	0.964204	0.0656331	0.00463455	0.936649	0.995797	1.27811	0.0902509	0.297619	0.929786	-0.0384169	-0.114578	-0.028829	0.0269204	-0.0518072	-0.0660719	-0.0124434	-0.0370402	-0.0403181
	Grlf1	1.74477	0.0492131	0.199528	0.94923	0.145204	0.00861237	0.865632	0.987312	4.68241	0.264145	0.0196802	0.46555	0.526642	0.0297091	0.597537	0.975827	0.0109017	0.0289715	-0.0161699	0.0232601	0.00693428	0.00648462	0.0150972	0.0261465	-0.00461782
	Hmgb2	1.90909	Inf	0.200394	0.949233	NA	NA	NA	NA	NA	NA	NA	NA	NA	NA	NA	NA	0	NA	NA	0	NA	NA	0	0	NA
	Srebf2	1.64644	0.055535	0.213425	0.949247	2.79156	0.18115	0.0841277	0.655096	0.225614	0.0152201	0.799935	0.976076	0.483013	0.0325845	0.623608	0.974567	-0.0806374	-0.166864	-0.0108521	-0.101734	-0.0747742	-0.0777144	-0.0929605	-0.129647	-0.0335394
	Cntd1	1.74073	0.058338	0.200031	0.94927	1.09798	0.073383	0.350402	0.869125	0.302305	0.0202627	0.742005	0.971992	1.14867	0.0769921	0.334587	0.932789	0.0160662	0.00191814	0.00364472	0.0483176	0.0115511	0.00199804	0.0299343	0.0248607	0.00759789
	Gm14547	1.70438	0.0553492	0.204625	0.949287	0.745521	0.0468185	0.485609	0.918602	0.190719	0.012387	0.827659	0.978022	2.10823	0.136928	0.144314	0.931788	0.0572033	0.162392	0.0521562	-0.074142	0.116227	0.0985008	0.0210423	0.0288347	0.0841914
	Pold1	1.88633	0.196603	0.211988	0.94935	0.354153	0.0738231	0.713653	0.975133	NA	NA	NA	NA	NA	NA	NA	NA	0.169941	NA	0	NA	NA	0.130225	0.269231	0.162782	0.179487
	Ctdp1	1.62722	0.049362	0.214821	0.949466	0.0434064	0.00242832	0.9576	0.995891	0.8679	0.0526557	0.433133	0.914699	3.25763	0.197641	0.0567982	0.906164	-0.0383568	0.077699	-0.130658	-0.0930849	0.00631281	-0.0324855	-0.043386	-0.015048	-0.0621726
	Gm24366	1.78972	0.229754	0.229433	0.94947	NA	NA	NA	NA	NA	NA	NA	NA	NA	NA	NA	NA	-0.148326	NA	-0.275692	NA	NA	-0.161458	NA	NA	-0.26256
	Sdc4	1.70529	0.0601375	0.204508	0.949474	1.43683	0.102491	0.258228	0.819682	0.111782	0.00788405	0.894722	0.986678	0.27703	0.019539	0.760526	0.992338	-0.0161804	-0.024093	0.00250174	-0.0216256	-0.0244365	-0.0102226	-0.0230311	-0.0217175	-0.0109674
	Arrdc3	1.70314	0.062577	0.204784	0.949475	0.61898	0.0442659	0.547224	0.93506	0.214518	0.0157637	0.808527	0.976852	0.423288	0.031105	0.659889	0.974486	0.0288867	0.0613941	0.0424288	-0.0220815	0.0364999	0.0513542	0.00720924	0.0168657	0.0394644
	Eny2	1.95694	0.17914	0.211352	0.949493	1.48359	0.271617	0.299562	0.840627	NA	NA	NA	NA	NA	NA	NA	NA	-0.130671	NA	-0.0658091	NA	NA	-0.0511191	-0.25	NA	-0.0360602
	Rps6ka1	1.73714	0.0578946	0.201699	0.949505	0.705984	0.0529264	0.504966	0.924854	0.205166	0.0136754	0.816125	0.97917	2.72284	0.181492	0.0888338	0.909091	-0.0546726	-0.0840291	-0.0235574	0.00271469	-0.203125	-0.0467063	-0.0672053	-0.0361334	-0.0743607
	Cldn15	1.59755	0.0429367	0.218911	0.949512	3.20579	0.165589	0.059144	0.576806	0.467803	0.0251459	0.632207	0.954106	2.63121	0.141436	0.0935324	0.901423	-0.0277399	0.0167312	0.0240666	-0.115214	-0.0334414	0.0239743	-0.0743275	-0.0525067	-0.00468739
	C130074G19Rik	1.67763	0.0240452	0.20809	0.949521	2.98773	0.10712	0.0702299	0.620742	16.2218	0.46501	4.03247e-05	0.0142857	3.33658	0.0956451	0.053418	0.891727	-0.00691827	0.00379111	-0.00723	0.00929133	-0.0249016	-0.00507096	-0.00780515	0.00480496	-0.0160658
	Dram1	1.74147	0.0228126	0.199938	0.949538	2.26239	0.0785498	0.126778	0.726645	17.3141	0.453616	2.58568e-05	0.0181818	6.22182	0.163007	0.00692118	0.832353	-0.008137	0.0127406	-0.00352838	-0.0178507	-0.0182145	0.00300769	-0.0180326	-0.00277034	-0.0108714
	Pcp4l1	2.24443	0.35943	0.208457	0.949559	NA	NA	NA	NA	NA	NA	NA	NA	NA	NA	NA	NA	0.0618137	NA	NA	NA	NA	NA	NA	NA	0.0674789
	4930586N03Rik	1.61538	Inf	0.219917	0.949584	2.1	Inf	0.151452	0.747744	2.22353	Inf	0.137094	0.764924	3.17647	Inf	0.06584	0.913018	0	0	0	0	0	0	0	0	0
	Gimap8	1.71147	0.0499682	0.207255	0.94963	2.24332	0.167574	0.134937	0.729692	3.25557	0.1901	0.0621127	0.634979	1.77095	0.10341	0.198562	0.92076	-0.07528	-0.207718	-0.204477	0.214012	-0.0696446	-0.206097	0.0374259	0.00818136	-0.12743
	Klf7	1.52477	0.0511369	0.229367	0.949702	2.51695	0.165745	0.102686	0.681203	0.0361565	0.0024252	0.964544	0.997809	0.0931659	0.00624911	0.911384	0.998303	-0.0302257	-0.0718629	-0.0881554	0.0217239	0.0102148	-0.0814785	0.0159694	-0.0205966	-0.0389703
	Pgm3	1.67842	0.0536754	0.207987	0.949705	2.35393	0.142839	0.117473	0.714237	0.333347	0.0213207	0.719926	0.971119	0.608379	0.0389117	0.552759	0.966743	-0.0421626	-0.0263935	0.0260601	-0.110335	-0.0547912	0.00495528	-0.0825631	-0.0726811	-0.0143655
	Stard13	1.52768	0.057509	0.228936	0.949734	0.229153	0.0156005	0.797001	0.980117	0.206073	0.0155151	0.81526	0.980376	0.583044	0.043897	0.566235	0.967723	-0.0409033	-0.082861	-0.0077726	-0.0369196	-0.0451504	-0.0392156	-0.041035	-0.0574891	-0.0264615
	Vegfa	1.68333	0.0579495	0.207346	0.949741	0.826153	0.0648254	0.450307	0.906804	1.17139	0.0806513	0.327753	0.90407	0.184902	0.0127307	0.832409	0.994903	-0.0184172	-0.0622939	-0.002447	-0.0218919	0.00484072	-0.0300344	-0.0085256	-0.0396454	0.00119686
	Mogat2	1.65752	0.0627263	0.211948	0.949747	1.88354	0.14256	0.176855	0.771213	NA	NA	NA	NA	NA	NA	NA	NA	-0.0145413	0	0	0	NA	0	-0.0290826	0	-0.0290826
	Pecam1	1.62792	0.0542363	0.214727	0.949786	0.257601	0.0143158	0.775104	0.975417	1.21414	0.0809016	0.3153	0.902299	1.22192	0.0814202	0.313089	0.927594	-0.0101406	-0.0226587	-0.00750582	0.00493496	-0.0142329	-0.0160492	-0.00464895	-0.00849311	-0.0108693
	Ddx55	1.59675	0.053542	0.219591	0.949826	1.96899	0.109974	0.163437	0.761787	0.658966	0.0441927	0.527302	0.934778	0.484845	0.0325156	0.622218	0.973824	0.0789258	0.102754	-0.158942	0.201232	0.177589	-0.0540872	0.18941	0.166359	0.00932315
	Gm19967	2.1119	0.345539	0.21982	0.949827	NA	NA	NA	NA	NA	NA	NA	NA	NA	NA	NA	NA	0.0692056	NA	NA	NA	NA	NA	0.0448434	NA	NA
	Rap1gap2	1.72781	0.0594529	0.201648	0.949848	0.283952	0.0223068	0.755403	0.975542	0.645626	0.0444311	0.533576	0.936887	1.23747	0.0851611	0.308722	0.930071	0.0195977	0.0304896	0.0183908	0.00918515	0.0223063	0.0244408	0.0157457	0.0199266	0.0203485
	Ppat	1.70749	0.096572	0.213956	0.949857	1.48676	0.168176	0.262137	0.819207	NA	NA	NA	NA	NA	NA	NA	NA	0.17622	NA	NA	0.232095	NA	0.154358	0.108883	0.28808	-0.0205675
	Tpbg	3.24719	0.618844	0.213334	0.949892	NA	NA	NA	NA	NA	NA	NA	NA	NA	NA	NA	NA	-0.141667	NA	NA	NA	NA	NA	NA	NA	NA
	Ptpra	1.57558	0.0543964	0.222002	0.949897	1.9312	0.130406	0.167766	0.768802	0.19234	0.0132809	0.82634	0.978921	0.0710807	0.00490807	0.931591	1.0027	-0.0179876	0.00717561	0.0121321	-0.043757	-0.046494	0.0108542	-0.0451255	-0.0195256	-0.0171809
	Fam171a1	1.69176	0.0800068	0.211791	0.949928	0.475537	0.0400962	0.63006	0.955195	0.045679	0.0043205	0.955473	0.99652	1.20551	0.114022	0.325339	0.929027	0.106718	-0.022584	0.179246	0.241301	-0.077285	0.0783311	0.135106	0.128207	0.0766337
	Ptprc	1.63766	0.0597394	0.213405	0.949928	0.585612	0.0451885	0.564853	0.941264	0.624239	0.0455426	0.544501	0.938007	0.178026	0.0129882	0.838063	0.995095	-0.0200187	-0.0253076	-0.00968996	-0.0502614	0.00253654	-0.0170461	-0.0238624	-0.0375947	-0.00357671
	Ncoa6	1.66592	0.0513807	0.20963	0.949963	0.748228	0.0464101	0.484376	0.917692	1.30739	0.0806458	0.289886	0.885641	1.82295	0.112448	0.184129	0.923411	-0.0752371	0.148797	-0.186949	-0.107189	-0.144349	-0.0245711	-0.125769	0.0206578	-0.165649
	Acaa1a	1.65341	0.0513535	0.211291	0.949964	0.293727	0.0186335	0.748235	0.977807	0.134086	0.00832918	0.875194	0.985381	3.34382	0.207712	0.0531192	0.897091	-0.0140145	0.00867593	-0.024193	-0.04238	0.00681752	-0.0104982	-0.0177812	-0.0196945	-0.00868774
	Gm20659	1.62895	0.0505556	0.214586	0.949964	1.94379	0.116634	0.165969	0.766807	0.312197	0.0193784	0.73489	0.970073	1.54007	0.0955939	0.235671	0.933958	0.0169277	0.0187208	0.0468214	0.01703	-0.0160909	0.035892	0.000469563	0.0178107	0.0153653
	Nt5c3b	1.59773	0.0547988	0.218886	0.949965	1.46326	0.106818	0.252239	0.815469	0.679025	0.0465783	0.516989	0.933856	0.136983	0.00939651	0.872691	0.996473	0.0674297	0.0130344	0.115118	0.0191352	0.101499	0.0687524	0.060317	0.0210189	0.108309
	Fam189a2	1.68846	0.058109	0.206679	0.95	0.350182	0.0231276	0.708252	0.973471	0.116919	0.0080476	0.890183	0.987471	1.71706	0.118186	0.201825	0.926306	0.0460532	0.0602994	0.0140698	-0.000303225	0.10756	0.039931	0.0536282	0.0295958	0.0608147
	Mboat7	1.52521	0.0460548	0.229301	0.950066	0.7184	0.035194	0.49815	0.920911	2.37899	0.143671	0.115056	0.755513	1.19862	0.0723867	0.31976	0.927371	0.0283195	-0.0236843	0.0283128	0.0980699	0.00818931	0.0011165	0.0531296	0.0425594	0.018251
	Zfp758	1.69056	0.0612821	0.206406	0.950074	0.382456	0.0314527	0.686442	0.972218	0.754812	0.0547232	0.481392	0.933508	0.310713	0.0225264	0.735953	0.987364	0.0411862	0.11478	0.0357686	0.0531122	-0.0240904	0.0698822	0.0145109	0.0795733	0.0058391
	Agt	1.57229	0.0445766	0.222471	0.950103	3.16524	0.194953	0.0610519	0.581331	1.85375	0.105113	0.179303	0.818047	0.330627	0.0187475	0.721832	0.98546	-0.0285786	-0.142756	-0.017874	-0.0140611	0.0384024	-0.0748241	0.0121706	-0.0704756	0.0102642
	Pde3a	1.68346	0.0670511	0.207907	0.950111	0.301623	0.0278118	0.742626	0.978237	0.318324	0.0253573	0.730661	0.969755	0.0918605	0.0073175	0.91258	0.998326	0.0692043	-0.0495722	0.0709134	0.0750453	0.140453	0.024943	0.107749	0.0274738	0.105683
	Hey1	1.79324	0.201436	0.22238	0.950137	0.0545183	0.0122482	0.947339	0.994141	NA	NA	NA	NA	NA	NA	NA	NA	-0.313696	-0.418012	NA	0.120098	NA	-0.365631	-0.259531	-0.148957	NA
	Elmod2	1.55359	0.0441349	0.225152	0.950169	1.01877	0.0664491	0.37676	0.876252	2.54149	0.144399	0.100641	0.739193	1.7634	0.100191	0.193863	0.929406	-0.0128774	0.00435358	-0.0120064	0.0190298	-0.0573983	-0.00522236	-0.0191842	0.0103774	-0.0347023
	Ccdc50	1.67497	0.0550411	0.208438	0.950184	1.73666	0.111105	0.198414	0.793006	0.260972	0.0171515	0.772553	0.976662	0.880543	0.0578708	0.428074	0.95058	-0.00715725	-0.0193997	-0.0158406	0.00949062	-0.00460931	-0.0172248	0.00244066	-0.00367405	-0.0102249
	n-R5s169	1.99815	0.249826	0.207214	0.950259	NA	NA	NA	NA	NA	NA	NA	NA	NA	NA	NA	NA	0.279572	NA	NA	NA	NA	NA	NA	0.292341	NA
	Vps18	1.59858	0.0473161	0.218767	0.950279	0.423352	0.0226632	0.659848	0.964613	0.344336	0.0203838	0.712282	0.969366	3.82561	0.226467	0.0367891	0.928571	-0.0140881	-0.0504824	0.0100143	0.019801	-0.0416171	-0.018158	-0.010908	-0.0115928	-0.0158014
	Fam46c	1.68524	0.0414964	0.207097	0.950297	5.64417	0.282942	0.0101318	0.290741	0.405995	0.019994	0.670996	0.962608	1.91307	0.0942127	0.170393	0.921844	0.0277063	0.0733304	-0.0347425	0.0299232	0.0623133	0.0127979	0.0461182	0.043167	0.0137854
	Mif4gd	1.59614	0.0524257	0.219108	0.950314	1.21246	0.0803696	0.315781	0.848791	0.571254	0.037526	0.572628	0.946781	1.1411	0.0749598	0.336897	0.931676	-0.0612606	-0.0648572	-0.0477499	-0.0961159	-0.0113893	-0.0641006	-0.0537526	-0.0924094	-0.0295696
	Tsr3	1.6013	0.0466757	0.21839	0.950315	0.912519	0.0502656	0.415562	0.88059	0.354444	0.0206632	0.705329	0.971269	3.58579	0.209042	0.0441055	0.905778	0.0281392	0.0547316	-0.0444538	0.050531	0.0621115	-0.00249118	0.0563212	0.0488704	0.00882883
	Rcn1	1.5278	0.0541048	0.228918	0.950365	0.392209	0.0277321	0.679996	0.97137	0.00624952	0.000442636	0.993772	0.99836	1.45652	0.103161	0.253752	0.927495	-0.0206396	0.00746205	-0.02684	-0.0508833	-0.0128858	-0.00925015	-0.0318845	-0.0215935	-0.0198629
	Mtif3	1.66221	0.0597306	0.210121	0.950401	0.367123	0.0250759	0.696711	0.972483	0.315421	0.022669	0.732587	0.970296	0.900575	0.0647233	0.420188	0.935006	0.0192039	0.00174966	0.0328795	0.0103656	0.0287052	0.0197305	0.0195354	0.00696256	0.0307924
	Frmd8	1.54815	0.0528265	0.225939	0.950404	0.751624	0.0498035	0.482834	0.917525	0.99367	0.0678126	0.385558	0.919877	0.633813	0.0432543	0.539581	0.965952	-0.0464109	0.0503025	-0.0543374	-0.0699519	-0.0958136	-0.00563715	-0.0828827	-0.0188164	-0.0750755
	Ppp1r7	1.57431	0.0521057	0.222183	0.950411	1.05632	0.0639618	0.364005	0.872171	0.515869	0.034148	0.603727	0.950848	1.24754	0.0825806	0.305931	0.931168	-0.0484899	-0.0644224	-0.00520104	-0.0729156	-0.0601599	-0.0255393	-0.0665378	-0.0681017	-0.0326805
	Fadd	1.59287	0.0489007	0.219565	0.950417	0.626429	0.0368768	0.543371	0.933948	0.783451	0.0481035	0.468641	0.926538	2.58046	0.158439	0.0974832	0.905458	0.0313547	-0.0180731	0.120584	0.0167308	-0.00303954	0.0583447	0.00684564	0.00301162	0.0587721
	Gm2673	1.7396	0.0945186	0.208358	0.950442	NA	NA	NA	NA	1.3326	0.14481	0.295272	0.88937	NA	NA	NA	NA	-0.10198	NA	NA	-0.178202	-0.065387	NA	-0.112096	-0.228909	-0.0153754
	Pus3	1.67958	0.0530807	0.207835	0.950443	1.28759	0.0856565	0.295089	0.840283	0.309062	0.0195349	0.737137	0.969048	1.88458	0.119119	0.17461	0.915287	-0.0416366	-0.182742	-0.0131373	0.0377342	-0.0281068	-0.092585	0.00481374	-0.0644554	-0.020622
	Xrcc1	1.65826	0.0947224	0.218718	0.950454	0.924154	0.105578	0.419774	0.882097	NA	NA	NA	NA	NA	NA	NA	NA	0.234571	NA	NA	NA	0.773097	-0.00564043	0.452912	-0.0964738	0.522912
	Blmh	1.66737	0.0397978	0.209439	0.950476	2.41096	0.11044	0.112052	0.703638	0.476425	0.0227432	0.626993	0.956142	5.72694	0.273388	0.00958585	0.804082	0.0170956	0.0685963	-0.0468646	-0.00128324	0.053628	0.00549308	0.0261724	0.0317814	0.00338166
	Atp8b1	1.72802	0.0482802	0.201623	0.950496	0.0873263	0.006909	0.91668	0.990941	2.02681	0.113257	0.154625	0.79175	3.41756	0.190971	0.0501766	0.900769	0.0297275	-0.0341657	0.0663042	0.0902168	-0.0231842	0.0250835	0.0335163	0.0353979	0.02156
	Cpsf7	1.71246	0.116395	0.213329	0.950503	NA	NA	NA	NA	NA	NA	NA	NA	NA	NA	NA	NA	-0.139365	NA	NA	NA	-0.166667	NA	-0.225448	NA	-0.113388
	Ahdc1	1.66612	0.0596943	0.209603	0.950512	0.786681	0.0500277	0.467227	0.914164	0.584575	0.0418887	0.565411	0.944944	0.251131	0.0179952	0.780026	0.996923	0.0294113	0.0206006	-0.00715425	0.0846266	0.0193822	0.00412294	0.0520044	0.0550676	0.00611399
	Gtf2h4	1.62926	0.0522051	0.214544	0.950571	0.0109744	0.000954072	0.989091	0.999652	2.02747	0.129929	0.154538	0.79204	1.2513	0.0801893	0.304893	0.93134	-0.0555503	-0.010811	-0.0811464	0.0794373	-0.199126	-0.0512829	-0.0598444	0.0345841	-0.140136
	Lrrc28	1.54898	0.0382549	0.22582	0.950572	1.12197	0.0609406	0.342817	0.869278	1.97618	0.0976109	0.161438	0.805283	4.87285	0.240688	0.0172026	0.9	0.0263729	-0.0102985	0.119378	0.0472917	-0.054578	0.0589196	-0.00364314	0.0227225	0.0324
	A930033H14Rik	1.81143	0.167548	0.211257	0.950581	NA	NA	NA	NA	NA	NA	NA	NA	NA	NA	NA	NA	0.152303	NA	NA	NA	0.0720751	NA	0.118771	NA	0.122373
	Vps37b	1.5736	0.0539102	0.222284	0.950582	0.0864922	0.00690058	0.91744	0.990286	0.156409	0.0107169	0.856111	0.982612	2.06495	0.141487	0.149698	0.936829	0.0567279	0.118591	-0.0228201	-0.0215978	0.149632	0.0477459	0.0640173	0.0479937	0.0634062
	Usp47	1.64974	0.0497865	0.211781	0.950615	0.0499841	0.00170111	0.951348	0.994611	2.43722	0.147103	0.109648	0.748862	1.75607	0.105991	0.195099	0.920358	-0.0118178	-0.0296858	0.00457709	-0.019767	-0.00949587	-0.00881038	-0.0146314	-0.0230619	-0.00245939
	Gclm	1.66433	0.0512517	0.20984	0.950658	1.22353	0.075246	0.312636	0.847847	1.2363	0.0761417	0.309049	0.8981	1.44485	0.0889861	0.256394	0.928541	-0.0151298	0.00658701	-0.0568391	0.00487649	-0.00869077	-0.0284197	-0.00190714	0.00352477	-0.032765
	B4galt6	1.66819	0.0392632	0.209331	0.95066	1.32008	0.0614386	0.286603	0.830702	3.46883	0.163288	0.0482353	0.577805	4.12063	0.19397	0.0295455	0.928767	-0.0194363	-0.03688	-0.0431661	-0.00609379	-0.00267149	-0.0342262	-0.00438264	-0.018445	-0.0229188
	Sar1b	1.55926	0.0392793	0.224335	0.950678	5.91366	0.296445	0.00846816	0.272028	1.06115	0.0534628	0.362399	0.904526	0.593932	0.0299235	0.560401	0.966591	-0.0128971	-0.0524495	-0.0204693	0.0131626	0.00524688	-0.0346456	0.00920475	-0.0195309	-0.00761119
	Tm6sf1	1.56442	0.0581725	0.223594	0.95068	0.913547	0.0642253	0.415167	0.880784	0.132584	0.00986018	0.876494	0.986021	0.118048	0.00877915	0.889188	0.99583	0.0217788	0.0416676	0.0373126	-0.00398357	0.014901	0.0403573	0.00545873	0.0164949	0.0261068
	1600014C10Rik	1.6542	0.0482535	0.211186	0.95069	0.1085	0.0067736	0.897635	0.992719	4.31367	0.251662	0.0256536	0.5052	0.391447	0.0228373	0.680496	0.975	-0.0121975	0.00514113	-0.0260947	0.0113076	-0.0396809	-0.00980125	-0.0141866	0.00869045	-0.0328878
	Ddit4	1.59927	0.0571495	0.218671	0.950699	0.627961	0.0428268	0.542582	0.934892	0.272657	0.0194866	0.76378	0.973503	0.791768	0.0565871	0.465007	0.955216	0.0542192	-0.0413291	0.113823	0.0791264	0.0521936	0.0452047	0.06566	0.022416	0.0830081
	Gimap5	1.68872	0.0600936	0.206645	0.950706	0.860327	0.0603828	0.436195	0.896959	0.108411	0.00771569	0.897714	0.988514	0.737644	0.0524986	0.489216	0.960665	0.051956	-0.0413289	0.0871561	0.0988978	0.052519	0.0297651	0.0757084	0.0323893	0.0698376
	Gm12301	1.64288	0.1201	0.224142	0.950713	NA	NA	NA	NA	0.0181895	0.00265943	0.982002	0.999446	NA	NA	NA	NA	0.136286	0.0666376	-0.0677761	NA	NA	0.0022425	NA	0.154817	0.117699
	Cluh	1.56522	0.0490082	0.22348	0.950715	0.267799	0.0164798	0.767415	0.975718	0.216905	0.0135829	0.806635	0.977493	3.20162	0.200491	0.0593368	0.902913	-0.00976936	-0.0338874	0.0124095	0.00510623	-0.0267596	-0.0090264	-0.0108267	-0.0122352	-0.00717507
	Gpr116	1.52855	0.0509032	0.228807	0.950731	0.388602	0.029408	0.682372	0.971999	1.17315	0.0781357	0.327229	0.903868	1.18825	0.0791415	0.322778	0.925281	0.0114197	0.0508906	-0.00626412	0.0047619	0.00235982	0.0198575	0.00356086	0.0257192	-0.00195215
	Camta2	1.55368	0.0527227	0.225139	0.950743	0.816346	0.0551957	0.454447	0.909575	0.00371852	0.00025237	0.996289	0.999812	1.63752	0.111135	0.216333	0.932963	-0.0318462	-0.0275397	-0.00512231	-0.0295076	-0.0622576	-0.0188608	-0.0458826	-0.0297173	-0.03369
	Slc12a2	1.63871	0.049847	0.213264	0.950755	0.280131	0.0153291	0.758226	0.974918	2.23567	0.136012	0.129644	0.762457	1.60219	0.0974727	0.223136	0.938519	-0.0372126	-0.114181	0.0367921	-0.0111306	-0.0673069	-0.0365636	-0.0392187	-0.0567091	-0.0152574
	n-R5s180	2.04148	0.289922	0.212436	0.950758	NA	NA	NA	NA	NA	NA	NA	NA	NA	NA	NA	NA	-0.0595379	NA	-0.0635334	NA	NA	-0.0595379	NA	NA	-0.0635334
	Mtf1	1.64264	0.0488645	0.212734	0.950793	1.58147	0.0992864	0.227234	0.808355	1.08001	0.0642553	0.356199	0.907506	1.82535	0.108599	0.183747	0.923357	0.0671324	0.137749	0.04609	-0.11589	0.190456	0.0929717	0.0372829	0.00890983	0.118273
	Wdr62	1.82188	0.14624	0.210057	0.950803	0.818126	0.13134	0.471566	0.914698	NA	NA	NA	NA	NA	NA	NA	NA	0.156635	NA	NA	0.0699939	NA	0.292193	0.114967	0.000216629	0.302419
	Usp24	1.56208	0.0455232	0.22393	0.950815	2.02596	0.125368	0.154736	0.751773	0.901331	0.0525345	0.419894	0.9132	1.94862	0.113576	0.165285	0.925968	0.0210705	0.0552265	-0.0102698	0.0291659	0.0164589	0.0215482	0.0228124	0.0409622	0.00309459
	Tmem87a	1.51967	0.0507015	0.230122	0.950826	0.472872	0.037338	0.629135	0.955382	2.21494	0.147796	0.131915	0.762683	0.0387694	0.00258697	0.962035	1.00006	0.0271252	-0.0398091	0.0415445	0.00137263	0.0938123	0.00546578	0.0475925	-0.0174264	0.0676784
	Gm13157	1.69502	0.0655786	0.207041	0.950854	0.952163	0.0734104	0.401947	0.877407	0.613777	0.0474928	0.550731	0.940248	0.0101275	0.000783643	0.989928	1.00309	-0.0807658	-0.149425	-0.153344	-0.0187435	-0.0293128	-0.155745	-0.0240281	-0.0747499	-0.0819579
	Cep170b	1.63447	0.0578196	0.214409	0.950929	0.988382	0.0792239	0.388109	0.880928	0.871826	0.061682	0.432142	0.915202	0.456765	0.0323163	0.639201	0.974384	0.0690031	0.181427	0.147343	0.0177609	-0.01527	0.14644	0.00124547	0.088329	0.0582216
	Sorl1	1.58513	0.0511269	0.225038	0.95098	0.442962	0.0430332	0.649335	0.963666	1.01555	0.0655112	0.383155	0.92088	4.7508	0.306466	0.0229617	0.95	-0.101929	-0.254285	0.066087	0.0268462	-0.302938	-0.0748774	-0.138046	-0.0556736	-0.13034
	Rab11b	1.65883	0.053088	0.210569	0.950983	1.49972	0.0913614	0.244222	0.819134	0.393953	0.0252156	0.67885	0.964565	1.40032	0.0896297	0.266759	0.9295	0.0169541	-0.00154217	-0.00761758	0.0595392	0.0171184	-0.00628129	0.0383288	0.0301064	0.00475042
	Bclaf1	1.72851	0.0619672	0.201561	0.950992	0.0846386	0.00619876	0.919129	0.990192	0.13263	0.00950963	0.876454	0.986165	1.36544	0.0979025	0.275195	0.937074	-0.0180678	0.00165327	-0.0253943	-0.0446858	-0.00219834	-0.0122506	-0.0234421	-0.0222562	-0.0137963
	Nat9	1.5931	0.0402611	0.219534	0.951009	5.60816	0.291809	0.0103798	0.290909	0.39073	0.0197493	0.680969	0.963905	1.48911	0.0752662	0.246526	0.930958	0.017846	0.0156987	-0.0121378	-0.000573326	0.0627819	0.000543895	0.0311043	0.00947339	0.0253221
	Pcsk5	1.53283	0.0470626	0.228177	0.951067	0.00817658	0.000967747	0.99186	0.99941	2.83902	0.174333	0.0790773	0.687952	1.17145	0.0719338	0.327736	0.931184	0.0546816	-0.132509	0.202644	0.0123778	0.103526	0.051498	0.0579521	-0.052329	0.153085
	Ptgfrn	1.73122	0.0625858	0.20122	0.95107	0.0535908	0.00407459	0.947938	0.99454	1.00816	0.0728926	0.380452	0.919392	0.403434	0.0291692	0.672658	0.975745	0.023825	0.0586151	0.00209809	0.0242905	0.0156902	0.0276198	0.0199903	0.0412022	0.00889414
	4930486L24Rik	1.69122	0.101991	0.225752	0.951078	2.94546	0.355257	0.103739	0.683602	NA	NA	NA	NA	NA	NA	NA	NA	-0.194818	NA	NA	NA	NA	-0.465558	-0.0336996	-0.451823	-0.0286764
	Gm25117	2.05936	0.29172	0.210745	0.951092	NA	NA	NA	NA	NA	NA	NA	NA	NA	NA	NA	NA	-0.295125	NA	NA	NA	NA	NA	-0.428289	NA	-0.533453
	Sh3bp5l	1.53275	0.0559991	0.22875	0.951098	1.04607	0.0763535	0.368146	0.873931	0.299029	0.0218501	0.744504	0.972021	0.573989	0.0419416	0.571486	0.970809	0.0433707	0.0961711	0.0628634	0.025688	-0.00727916	0.0823874	0.00903771	0.0587016	0.0251828
	Macf1	1.73224	0.0655203	0.201092	0.951109	0.0645516	0.00420194	0.937657	0.991246	0.759234	0.0574344	0.479399	0.929249	0.0292307	0.00221124	0.971228	1.00269	0.0240186	0.0392064	-0.00343567	0.0492553	0.0111236	0.0173177	0.0301895	0.0449803	0.00384396
	Ube2o	1.73416	0.0592942	0.200852	0.951111	0.43764	0.0257181	0.650823	0.963457	0.618814	0.0423169	0.54731	0.937962	1.19981	0.0820475	0.319417	0.927102	-0.0215524	-0.00786329	-0.0638472	-0.00574133	-0.00881348	-0.0370933	-0.0072774	-0.00496484	-0.0363303
	Ebf3	1.59649	0.0429249	0.223455	0.951158	2.96754	0.141525	0.0784448	0.644687	5.47879	0.294617	0.0145737	0.42994	0.85175	0.045802	0.444091	0.955338	0.0552053	0.0875876	-0.0782581	0.297428	-0.0783432	0.00696361	0.0928488	0.214198	-0.0851972
	Gm24757	1.50615	0.0586961	0.232141	0.95118	0.404811	0.0322297	0.671763	0.971105	0.0338285	0.00263665	0.966785	0.997892	0.138385	0.010786	0.871483	0.996555	-0.0280578	-0.0346633	-0.0239216	-0.0366388	-0.0223982	-0.0279129	-0.0295185	-0.0333482	-0.0231599
	Gm13453	1.67941	0.120874	0.219374	0.951184	NA	NA	NA	NA	0.107272	0.0154415	0.899133	0.987392	NA	NA	NA	NA	-0.097526	-0.12111	-0.0544974	NA	NA	-0.0963776	NA	-0.111913	-0.0744384
	Sntb1	1.63947	0.0534306	0.213161	0.951223	1.27686	0.0789241	0.297954	0.839391	1.60781	0.104798	0.222038	0.840794	0.13767	0.00897339	0.872098	0.996254	-0.0310084	-0.0755597	-0.0518586	-0.0242407	0.0259045	-0.0664495	0.000831886	-0.047508	-0.0129771
	Hist1h2ae	1.53122	0.0555796	0.228414	0.951233	0.0892906	0.00577602	0.914895	0.991073	1.12106	0.0813839	0.343101	0.906696	0.299036	0.0217086	0.744372	0.988962	0.0272311	-0.0136111	0.0474867	0.030998	0.0402544	0.0180265	0.0356262	0.011396	0.0438705
	Gdi2	1.65957	0.0542735	0.210471	0.951239	0.224869	0.01025	0.800356	0.978734	1.28733	0.0841996	0.29516	0.890535	1.44701	0.0946437	0.255904	0.928245	-0.0114615	-0.0219786	-0.0119243	0.0117313	-0.0253067	-0.0166992	-0.0067877	-0.00294105	-0.0186155
	Zfp39	1.62934	0.0529395	0.214533	0.951249	1.01102	0.0590388	0.379453	0.878698	1.79822	0.116853	0.188105	0.818038	0.264799	0.0172074	0.769667	0.99303	-0.0370884	-0.0366477	-0.114996	0.0651941	-0.0677276	-0.0766451	-0.00126674	0.0203906	-0.0913618
	Scarb1	1.51984	0.055903	0.230097	0.951257	1.02613	0.0756204	0.374222	0.877339	0.125426	0.00922692	0.88272	0.98704	0.182031	0.013391	0.834765	0.99546	0.0277565	0.0305701	0.0661096	0.00294536	0.0104812	0.0486069	0.00671328	0.016668	0.0382954
	Ccl6	1.66863	0.0591896	0.209272	0.951284	0.21851	0.0164721	0.805365	0.979606	1.4112	0.100116	0.264186	0.867923	0.131611	0.00933703	0.877337	0.995604	-0.0406764	-0.0764765	0.0115189	-0.083379	-0.0245408	-0.0275569	-0.0539599	-0.0798932	-0.00651097
	Lsm6	1.65448	0.0498588	0.211149	0.951308	0.273922	0.0198192	0.762837	0.975266	1.92781	0.116192	0.168254	0.813104	2.06266	0.12432	0.149988	0.934097	-0.0342803	0.0641228	-0.0875276	-0.0264743	-0.0799668	-0.014198	-0.0532206	0.0190604	-0.0837472
	Igsf8	1.55	0.0587743	0.225671	0.951315	0.417706	0.0316394	0.663452	0.966233	0.169763	0.0128744	0.844913	0.98032	0.323571	0.0245389	0.726801	0.98394	0.0155037	0.0343012	0.0144817	0.000531114	0.0140996	0.0237314	0.00731536	0.0163062	0.0142906
	Gm16127	1.64049	0.046775	0.213024	0.951332	2.94273	0.169943	0.0727876	0.626437	0.521465	0.029737	0.600503	0.950997	1.75149	0.0998799	0.195876	0.921617	-0.0224306	0.00701207	-0.0200316	-0.0823949	0.00734419	-0.00902314	-0.0375254	-0.0393158	-0.00634371
	Zfp780b	1.64297	0.0642404	0.21269	0.951334	0.0994147	0.00769092	0.905754	0.993941	0.0418362	0.00327162	0.9591	0.997563	0.324902	0.0254075	0.725861	0.983714	0.0424627	0.0422886	0.0225906	0.0309585	0.0715044	0.0338944	0.0512314	0.036977	0.0470475
	Tuba1b	1.54566	0.040744	0.226302	0.951379	5.82208	0.309332	0.00899755	0.272368	0.24578	0.0129577	0.784122	0.975986	0.627193	0.033066	0.542978	0.968323	0.00605871	0.0261213	0.0202754	-0.0051907	-0.0130399	0.0226599	-0.00911529	0.0085454	0.00361775
	Srp9	1.56239	0.044149	0.223885	0.951394	0.803801	0.0439348	0.459804	0.912562	0.123099	0.00695691	0.884754	0.987002	4.48645	0.25355	0.02264	0.94381	0.0176363	0.0322821	-0.00118334	0.000722788	0.0340838	0.0166503	0.0174033	0.0194301	0.0164502
	Iffo1	1.68973	0.0730091	0.210038	0.951424	0.791194	0.0556876	0.468448	0.91396	0.530099	0.0458086	0.597456	0.949753	0.405875	0.0350738	0.672341	0.975629	0.132167	0.17641	0.16469	-0.0306172	0.319925	0.170149	0.132807	0.0299182	0.211373
	Gtse1	1.86414	0.210301	0.214402	0.951465	NA	NA	NA	NA	NA	NA	NA	NA	NA	NA	NA	NA	0.227027	NA	NA	NA	NA	NA	NA	0.286683	NA
	Zfp329	1.50672	0.0529405	0.232056	0.951475	0.921971	0.0585323	0.41194	0.879659	0.679722	0.0477657	0.516649	0.933976	0.375277	0.0263716	0.691229	0.981051	-0.0223754	-0.0427372	-0.0486983	0.0258764	-0.0233163	-0.0479254	0.00128006	-0.00658322	-0.0360073
	Mbtd1	1.52918	0.0519847	0.228714	0.951531	1.21731	0.0821602	0.314399	0.847456	0.0602434	0.00409595	0.941683	0.994714	1.16589	0.079269	0.329393	0.931084	-0.0305434	-0.0331871	0.0034503	-0.0345146	-0.0480649	-0.016508	-0.0412897	-0.03911	-0.0223073
	Tslp	3.53076	0.638386	0.201009	0.951531	NA	NA	NA	NA	NA	NA	NA	NA	NA	NA	NA	NA	-0.580518	NA	NA	NA	NA	NA	NA	NA	-0.580518
	Clasrp	1.66508	0.13147	0.223384	0.951534	NA	NA	NA	NA	NA	NA	NA	NA	NA	NA	NA	NA	-0.129661	NA	-0.259259	NA	NA	-0.19103	NA	NA	-0.260973
	Mrps10	1.51696	0.0491408	0.230525	0.951551	1.9155	0.123887	0.170038	0.771193	0.123395	0.00799456	0.884496	0.987062	1.13746	0.0736946	0.338015	0.930231	-0.0235805	0.0368862	-0.00941059	-0.0890418	-0.0222103	0.0118838	-0.0556261	-0.0315188	-0.0158104
	E030030I06Rik	1.57867	0.0747275	0.225014	0.951556	0.773535	0.0732315	0.476121	0.915016	NA	NA	NA	NA	NA	NA	NA	NA	-0.150454	0.166667	-0.174367	-0.251389	NA	-0.0626735	-0.320112	-0.0463294	-0.220347
	RP23-58L22.2	1.57867	0.0747275	0.225014	0.951556	0.773535	0.0732315	0.476121	0.915016	NA	NA	NA	NA	NA	NA	NA	NA	-0.150454	0.166667	-0.174367	-0.251389	NA	-0.0626735	-0.320112	-0.0463294	-0.220347
	Mgrn1	1.72906	0.0617952	0.201491	0.951566	0.482815	0.0368265	0.623158	0.953606	0.748723	0.0535174	0.484151	0.933554	0.394202	0.0281769	0.678686	0.975339	0.0330692	0.0121605	0.0676129	-0.00657806	0.0554719	0.0406947	0.0244469	0.00219857	0.0615424
	Gm17104	1.52057	0.0570699	0.229989	0.951621	0.0472729	0.00327327	0.953919	0.996108	0.118387	0.00888658	0.88889	0.988665	0.896025	0.0672592	0.421966	0.935657	0.0352253	0.00689724	0.0717729	0.0668778	-0.0119381	0.0437631	0.0274699	0.0400014	0.0299174
	C4a	1.53293	0.0521352	0.228163	0.951634	0.0259857	0.00124377	0.974378	0.999294	1.58425	0.107761	0.226681	0.841172	0.824793	0.0561027	0.450878	0.953105	-0.017991	-0.0103804	-0.0309187	0.0167531	-0.0504413	-0.0194306	-0.0168441	0.00550011	-0.04068
	Ubb	1.55042	0.0538578	0.225611	0.951687	1.44743	0.0943257	0.255809	0.819026	0.427031	0.0296681	0.657511	0.959198	0.243948	0.0169484	0.78553	0.992378	-0.00705991	-0.00447106	-0.0115637	-0.000774932	-0.0113674	-0.00877918	-0.00607116	-0.00210657	-0.0114655
	Sfi1	1.55607	0.0524942	0.224794	0.951797	0.100294	0.00960514	0.904965	0.994049	1.13188	0.0763682	0.339737	0.906969	1.31116	0.0884642	0.288907	0.933607	-0.0209861	0.00892409	-0.0351279	-0.039599	-0.0128475	-0.015026	-0.0262232	-0.0160761	-0.0239877
	Itm2c	1.64326	0.0536066	0.21265	0.951804	0.00304669	0.00048551	0.996958	0.999344	0.993263	0.0648046	0.385703	0.919736	2.0091	0.131082	0.156971	0.930593	0.0127819	-0.00246201	0.0248547	0.0339322	-0.00788031	0.0124702	0.013026	0.0164544	0.00848718
	Olfml2b	1.50686	0.0572073	0.232034	0.951837	0.3835	0.0291595	0.685749	0.972192	0.000982295	7.45846e-05	0.999018	0.99985	0.532291	0.0404163	0.594319	0.975139	-0.0809767	-0.125705	0.0030895	-0.0326664	-0.165486	-0.0578551	-0.0990762	-0.0808748	-0.0811982
	E030011O05Rik	1.50423	0.0317853	0.23243	0.951866	8.3209	0.35485	0.00191032	0.112658	2.47602	0.10464	0.106197	0.743191	0.613305	0.025919	0.55018	0.969051	-0.0489034	0.0204298	-0.146729	-0.0273525	-0.0591242	-0.0661828	-0.0432383	0.00420748	-0.102927
	Mkks	1.6548	0.0480652	0.211106	0.951927	1.07025	0.0712475	0.359393	0.873119	1.74538	0.101393	0.196917	0.820525	2.07107	0.120312	0.148924	0.933675	0.0136338	0.0101607	0.0218913	0.0476061	-0.0230696	0.0161596	0.0122682	0.0296568	-0.000589146
	Gm9929	1.56635	0.0427438	0.223318	0.951978	4.68478	0.258493	0.019647	0.387698	0.234005	0.0127714	0.793219	0.975325	1.12056	0.0611578	0.343257	0.936494	0.0323118	-0.0228417	0.0565515	0.0871058	0.0123844	0.0189889	0.0497451	0.031073	0.0344679
	Clstn1	1.66867	0.0362534	0.209267	0.951982	3.19306	0.141183	0.0597357	0.577778	1.51272	0.0657304	0.241431	0.849168	5.97389	0.259576	0.0081385	0.83	0.0191124	-0.0430571	0.034046	0.0954949	-0.0145901	-0.00161522	0.0404524	0.0307538	0.00972794
	Mapkap1	1.51711	0.0481419	0.230503	0.952048	0.836097	0.0509687	0.44615	0.904439	1.08202	0.0686709	0.355545	0.907853	1.57998	0.100274	0.227533	0.937785	0.0190698	0.00202774	0.00407054	0.0171934	0.0559627	-0.000236353	0.036578	0.00876011	0.0300166
	Cyp2u1	1.63941	0.0904898	0.226747	0.952116	1.02483	0.139554	0.390718	0.881768	1.54585	0.170651	0.256072	0.859697	0.168146	0.0185621	0.847363	0.996081	0.0934669	0.302217	0.0885522	0.0349986	-0.0311281	0.195385	0.0144906	0.141886	0.0268021
	Gm24846	1.54397	0.0528259	0.226547	0.952151	0.101449	0.0101828	0.90393	0.993987	1.64343	0.112458	0.215216	0.834539	0.596932	0.0408471	0.558804	0.966937	0.0328263	0.0405804	0.00204586	0.013844	0.0660456	0.0245712	0.0399448	0.028265	0.0340457
	Dnajb1	1.53324	0.0439829	0.228118	0.952203	0.496228	0.027534	0.615192	0.952814	1.16045	0.0665778	0.331026	0.907417	3.50663	0.201184	0.0468564	0.91519	-0.0291584	-0.00235716	-0.00815722	-0.0280214	-0.0719016	-0.0075673	-0.0499615	-0.0199082	-0.0400294
	Fbxw8	1.53579	0.0539663	0.227743	0.952206	0.482942	0.0276193	0.623082	0.953995	1.3253	0.0931396	0.285265	0.880567	0.153028	0.0107545	0.858972	0.996396	0.0126536	0.000321446	0.03067	-0.00622524	0.0253892	0.0165943	0.00958199	-0.00423224	0.0280296
	Paip2	1.50768	0.047498	0.231911	0.952234	1.0981	0.0742858	0.350363	0.869745	1.72796	0.108875	0.199921	0.818047	0.791119	0.0498468	0.46529	0.954945	-0.0275243	-0.0821481	-0.0395937	-0.0550282	0.0632457	-0.060937	0.00410875	-0.0695948	0.011826
	Car2	1.6368	0.109511	0.22495	0.952304	0.654791	0.0876187	0.537157	0.933062	NA	NA	NA	NA	NA	NA	NA	NA	0.112488	NA	NA	0.102937	NA	0.243981	0.0184265	0.211952	0.013023
	Vcan	1.74538	0.0665978	0.209241	0.952314	1.19446	0.0907452	0.334025	0.86346	1.6448	0.12552	0.230788	0.84439	2.89191	0.220691	0.0914191	0.903975	0.0637737	0.298611	-0.0497847	-0.0396825	0.0815974	0.0977709	0.0330854	0.136724	0.0159064
	AC175315.1	1.84891	0.269957	0.232013	0.952331	NA	NA	NA	NA	NA	NA	NA	NA	NA	NA	NA	NA	-0.210715	NA	NA	NA	-0.22062	NA	-0.22062	NA	-0.177944
	Nme1	1.53901	0.0528052	0.227272	0.952346	0.231583	0.013064	0.795104	0.980445	1.70948	0.117308	0.203161	0.817652	0.36195	0.0248379	0.700213	0.984183	0.0168334	0.0309561	0.00483274	0.0522138	-0.0199182	0.0169305	0.0161478	0.0431035	-0.00754271
	Tmem182	1.53842	0.0480499	0.227358	0.952378	3.12678	0.194545	0.0629239	0.582437	0.168271	0.0105113	0.846156	0.979879	0.444331	0.0277558	0.646643	0.97544	0.0185895	0.0383931	0.0426024	0.015134	-0.0143304	0.04027	0.000401812	0.0228155	0.014136
	AC136215.1	1.56656	0.0488629	0.223288	0.95256	1.73059	0.105655	0.199464	0.791834	0.676471	0.0422	0.518237	0.933073	1.33976	0.0835777	0.281593	0.926258	-0.036684	-0.127048	-0.00481252	0.00954805	-0.0360899	-0.0650852	-0.0132709	-0.0519149	-0.0204512
	Sdc1	1.53364	0.0502989	0.228058	0.952572	1.71999	0.115072	0.20131	0.791838	0.753991	0.0494574	0.481763	0.933625	0.504466	0.03309	0.610355	0.977284	-0.0522611	-0.0374351	-0.0099882	-0.0588454	-0.1119	-0.0217257	-0.0853727	-0.0464195	-0.0609441
	Stxbp4	1.54477	0.0533699	0.227608	0.952642	1.5474	0.0976146	0.236106	0.816667	0.632917	0.0437329	0.540871	0.937103	1.01961	0.0704526	0.377911	0.941322	-0.105191	-0.0252726	0.140015	-0.282864	-0.194033	0.0578863	-0.238448	-0.196638	-0.0270091
	Zfp658	1.5402	0.0548611	0.227098	0.952685	0.310159	0.0203664	0.736349	0.976866	1.08607	0.0773702	0.354234	0.906205	0.370926	0.0264244	0.694148	0.983342	0.0332501	-0.013854	0.0589892	0.039802	0.0416878	0.0238832	0.0407449	0.0174552	0.0503385
	Dnajb14	1.50792	0.0465691	0.231875	0.952728	0.592871	0.0320633	0.560967	0.93977	2.38312	0.147195	0.114663	0.757032	0.960244	0.0593102	0.397622	0.949187	0.0141693	0.0525648	-0.028269	0.0265165	0.00830402	0.0098688	0.0174102	0.0396043	-0.00998249
	Pard3b	1.52102	0.0642422	0.231764	0.952763	1.07766	0.091033	0.35935	0.873404	NA	NA	NA	NA	NA	NA	NA	NA	-0.0846796	NA	-0.11716	-0.225958	0.114515	-0.17952	-0.0314019	-0.202234	0.0152256
	Trim24	1.51326	0.0549371	0.231634	0.952864	1.72141	0.122582	0.202038	0.791301	0.0178689	0.00129742	0.982304	0.998798	0.276779	0.0200962	0.760823	0.992439	-0.0645835	-0.100368	-0.127509	-0.00921816	0.00158649	-0.111725	-0.00647704	-0.0546987	-0.0761906
	Pura	1.53719	0.0459998	0.227538	0.952878	1.68667	0.104295	0.20724	0.792488	1.57569	0.094304	0.228393	0.841614	1.17767	0.0704829	0.32589	0.929777	-0.0140442	-0.0166393	-0.0305924	0.0270499	-0.0355057	-0.0232835	-0.0042279	0.00640782	-0.033049
	Numb	1.51351	0.0541645	0.23104	0.952902	1.61241	0.114042	0.221145	0.801628	0.0654958	0.00468785	0.936777	0.995638	0.0367345	0.00262927	0.963988	1.00008	0.0468848	0.108681	0.123517	-0.0387351	0.000558668	0.117023	-0.0190882	0.0307199	0.062038
	Mylk3	2.2392	0.427394	0.23145	0.952964	NA	NA	NA	NA	NA	NA	NA	NA	NA	NA	NA	NA	-0.424887	NA	NA	NA	-0.525085	NA	-0.424887	NA	-0.525085
	Rab2b	1.5391	0.0545097	0.227258	0.952985	0.319883	0.0229709	0.729414	0.976916	0.611761	0.0433329	0.550987	0.940359	0.916515	0.0649195	0.414027	0.936921	-0.0338068	-0.0602806	0.0192902	-0.0635436	-0.0307256	-0.0207258	-0.0471346	-0.0633045	-0.00571769
	2410017I17Rik	1.56674	0.0516863	0.223263	0.953005	0.427862	0.0235416	0.656984	0.963724	1.2814	0.0845464	0.296738	0.890034	1.16357	0.0767717	0.330089	0.930502	-0.0478534	0.05512	-0.18006	-0.0214814	-0.037221	-0.0696854	-0.0293512	0.0172574	-0.108641
	Adamtsl3	1.62397	0.139709	0.231355	0.953197	NA	NA	NA	NA	NA	NA	NA	NA	NA	NA	NA	NA	0.155987	NA	0.131042	NA	NA	0.0998375	NA	NA	0.207982
	Rcor1	1.51561	0.0677525	0.233307	0.954349	0.466338	0.0455693	0.634287	0.957655	0.239846	0.0214437	0.789095	0.976159	0.220937	0.0197531	0.803798	0.994054	0.079396	-0.0589572	0.0593841	0.137373	0.107173	0.0109852	0.127931	0.0637376	0.0910325
	Edem2	1.49514	0.0551889	0.233803	0.954569	0.275577	0.0184958	0.761605	0.975533	0.294095	0.0217113	0.747967	0.970921	0.72842	0.0537752	0.493476	0.960435	0.0351774	0.0307356	0.0777234	0.0427367	-0.00982178	0.0558118	0.0164575	0.034904	0.0339508
	Rangap1	1.49602	0.051309	0.23367	0.954735	1.66553	0.115397	0.211099	0.795183	0.160354	0.0109994	0.852786	0.981877	0.504601	0.0346127	0.610276	0.977457	-0.0454797	0.00951111	-0.0442747	-0.107209	-0.0235352	-0.0197502	-0.0653719	-0.0567528	-0.0339049
	1100001G20Rik	1.49862	0.050028	0.233276	0.954777	0.911726	0.0613645	0.415867	0.880639	1.30427	0.0870804	0.290699	0.885902	0.512481	0.0342161	0.605688	0.976209	0.0363357	-0.00525216	0.00451888	0.00630821	0.136062	-0.00212942	0.0711852	0.00227927	0.0702905
	Frmd4a	1.63023	0.151092	0.233628	0.954967	0.0797094	0.0147751	0.924029	0.990862	NA	NA	NA	NA	NA	NA	NA	NA	-0.229051	NA	NA	NA	NA	-0.156057	-0.302035	-0.0720092	NA
	Krit1	1.48827	0.0563766	0.234847	0.956315	0.189192	0.014382	0.828903	0.981735	0.555407	0.0420783	0.581344	0.950164	0.210634	0.0159579	0.811616	0.993389	0.0331727	0.0326328	0.00700493	0.0715463	0.0220526	0.0192287	0.0467994	0.0516397	0.0145288
	Sdad1	1.49024	0.0520733	0.234546	0.956323	0.269765	0.0148635	0.765942	0.975866	1.57762	0.110253	0.228005	0.841292	0.216582	0.015136	0.80689	0.995124	-0.0431504	-0.0358756	-0.0891903	-0.0395613	0.000503948	-0.0690096	-0.0195287	-0.0374634	-0.0443432
	Rps27l	1.55237	0.106546	0.234773	0.956808	0.00876969	0.00120381	0.991275	0.999531	NA	NA	NA	NA	NA	NA	NA	NA	-0.270898	-0.25	NA	NA	NA	-0.261071	-0.268834	-0.215441	-0.458885
	Ttl	1.49053	0.0523034	0.234503	0.956817	0.0935259	0.00459786	0.911059	0.991503	1.72473	0.121043	0.200483	0.818799	0.18536	0.0130087	0.832034	0.995354	-0.0237169	-0.015473	-0.0337632	-0.0362526	-0.0126932	-0.0223312	-0.0244729	-0.0267504	-0.0232282
	Shank3	1.68538	0.180655	0.235345	0.956827	0.321955	0.0690204	0.734917	0.977467	NA	NA	NA	NA	NA	NA	NA	NA	0.282035	NA	NA	NA	0.380623	0.176471	0.360073	0.30883	0.247675
	Gm9754	1.48291	0.0492259	0.235667	0.957208	0.777627	0.0478481	0.471204	0.915075	0.885237	0.0587719	0.426212	0.912862	1.15794	0.0768771	0.331779	0.932125	0.0137204	-0.00651334	0.0296079	0.00619341	0.0263949	0.0119217	0.0162941	-0.00186342	0.0280014
	Nit1	1.48553	0.0483367	0.235266	0.957254	0.201723	0.0136013	0.818752	0.978878	1.94654	0.126675	0.165578	0.807692	0.975424	0.0634775	0.392093	0.946689	-0.0264988	-0.0124416	-0.0163177	0.0228132	-0.102474	-0.0123059	-0.0398305	0.00687134	-0.059396
	2610035D17Rik	1.81638	0.266473	0.235587	0.95731	NA	NA	NA	NA	NA	NA	NA	NA	NA	NA	NA	NA	0.301673	NA	0.312097	NA	NA	0.312097	NA	NA	0.301673
	Aff3	1.4778	0.0600371	0.237004	0.958037	0.568482	0.0461903	0.574486	0.944389	NA	NA	NA	NA	NA	NA	NA	NA	-0.093994	NA	0.0515695	-0.223498	-0.00265318	-0.10085	-0.086336	-0.274519	0.0244581
	Lpgat1	1.48113	0.0464808	0.235938	0.958079	1.14118	0.075402	0.336876	0.86553	0.456834	0.0286726	0.638909	0.953764	2.09419	0.131439	0.146037	0.930378	0.0248923	0.053073	0.0558443	0.011962	-0.0215826	0.0564071	-0.00481032	0.0343183	0.0171308
	Fbl	1.52713	0.0913036	0.236879	0.958204	0.59935	0.0716676	0.562667	0.939647	NA	NA	NA	NA	NA	NA	NA	NA	-0.133444	-0.231925	0.112391	-0.381198	NA	-0.059767	-0.312793	-0.291634	0.0619378
	Gab1	0.521857	0.0183383	0.477332	0.958358	0.165055	0.0150486	0.848843	0.984391	0.690003	0.048494	0.51166	0.932434	1.61263	0.113337	0.221101	0.935708	-0.0239821	-0.129748	0.0361498	0.0096241	-0.0266457	-0.0412377	-0.00851082	-0.0562876	0.00475204
	Fbxl20	1.52727	0.0571429	0.236858	0.958371	1.4	0.157143	0.279082	0.823619	2.1	0.157143	0.159366	0.798451	2.1	0.157143	0.159366	0.935526	-0.0211538	0	-0.105769	0	0	-0.0423077	0	0	-0.0423077
	Gm11632	1.52727	0.0571429	0.236858	0.958371	1.4	0.157143	0.279082	0.823619	2.1	0.157143	0.159366	0.798451	2.1	0.157143	0.159366	0.935526	-0.0211538	0	-0.105769	0	0	-0.0423077	0	0	-0.0423077
	Pdhb	0.927419	0.03125	0.345551	0.958464	0.958333	0.0645833	0.398323	0.872612	0.958333	0.0645833	0.398323	0.921371	0.958333	0.0645833	0.398323	0.947828	0.000339842	0	0	0	0.00135937	0	0.000679684	0	0.000679684
	Tln2	0.521014	0.0132097	0.477684	0.958565	1.00907	0.0485349	0.380135	0.878973	0.190243	0.0096468	0.828046	0.978181	6.76104	0.342837	0.00490323	0.8	-0.00771386	-0.0252306	0.00542318	0.0173789	-0.0272706	-0.0117022	-0.00494582	-0.00382313	-0.0109237
	Mettl5	0.521961	0.0207256	0.477289	0.958618	0.702493	0.0535654	0.505669	0.923378	0.0609021	0.00483649	0.941067	0.995244	0.0678432	0.00538771	0.934593	1.00359	0.0258415	0.0441598	0.0891486	-0.0102588	-0.0167826	0.0687389	-0.0135207	0.0140525	0.036183
	Tug1	1.49445	0.0568477	0.236475	0.958679	1.4682	0.113803	0.255321	0.818944	0.714486	0.0543567	0.502131	0.932741	0.714468	0.0543553	0.50214	0.961377	-0.0830871	0.0084914	-0.0775209	-0.200585	-0.0124505	-0.0533766	-0.116305	-0.110981	-0.0339047
	2700062C07Rik	0.927419	Inf	0.345551	0.958695	0.958333	Inf	0.398323	0.866754	0.958333	Inf	0.398323	0.905296	0.958333	Inf	0.398323	0.930756	0	0	0	0	0	0	0	0	0
	Adam17	0.927419	Inf	0.345551	0.958695	0.958333	Inf	0.398323	0.866754	0.958333	Inf	0.398323	0.905296	0.958333	Inf	0.398323	0.930756	0	0	0	0	0	0	0	0	0
	Amd1	0.927419	Inf	0.345551	0.958695	0.958333	Inf	0.398323	0.866754	0.958333	Inf	0.398323	0.905296	0.958333	Inf	0.398323	0.930756	0	0	0	0	0	0	0	0	0
	Atad3a	0.927419	Inf	0.345551	0.958695	0.958333	Inf	0.398323	0.866754	0.958333	Inf	0.398323	0.905296	0.958333	Inf	0.398323	0.930756	0	0	0	0	0	0	0	0	0
	Brox	0.927419	Inf	0.345551	0.958695	0.958333	Inf	0.398323	0.866754	0.958333	Inf	0.398323	0.905296	0.958333	Inf	0.398323	0.930756	0	0	0	0	0	0	0	0	0
	Btaf1	0.927419	Inf	0.345551	0.958695	0.958333	Inf	0.398323	0.866754	0.958333	Inf	0.398323	0.905296	0.958333	Inf	0.398323	0.930756	0	0	0	0	0	0	0	0	0
	Btbd1	0.927419	Inf	0.345551	0.958695	0.958333	Inf	0.398323	0.866754	0.958333	Inf	0.398323	0.905296	0.958333	Inf	0.398323	0.930756	0	0	0	0	0	0	0	0	0
	Casp9	0.927419	Inf	0.345551	0.958695	0.958333	Inf	0.398323	0.866754	0.958333	Inf	0.398323	0.905296	0.958333	Inf	0.398323	0.930756	0	0	0	0	0	0	0	0	0
	Cetn3	0.927419	Inf	0.345551	0.958695	0.958333	Inf	0.398323	0.866754	0.958333	Inf	0.398323	0.905296	0.958333	Inf	0.398323	0.930756	0	0	0	0	0	0	0	0	0
	Chuk	0.927419	Inf	0.345551	0.958695	0.958333	Inf	0.398323	0.866754	0.958333	Inf	0.398323	0.905296	0.958333	Inf	0.398323	0.930756	0	0	0	0	0	0	0	0	0
	Cnih	0.927419	Inf	0.345551	0.958695	0.958333	Inf	0.398323	0.866754	0.958333	Inf	0.398323	0.905296	0.958333	Inf	0.398323	0.930756	0	0	0	0	0	0	0	0	0
	Cnot6	0.927419	Inf	0.345551	0.958695	0.958333	Inf	0.398323	0.866754	0.958333	Inf	0.398323	0.905296	0.958333	Inf	0.398323	0.930756	0	0	0	0	0	0	0	0	0
	Cox7a2	0.927419	Inf	0.345551	0.958695	0.958333	Inf	0.398323	0.866754	0.958333	Inf	0.398323	0.905296	0.958333	Inf	0.398323	0.930756	0	0	0	0	0	0	0	0	0
	D5Ertd579e	0.927419	Inf	0.345551	0.958695	0.958333	Inf	0.398323	0.866754	0.958333	Inf	0.398323	0.905296	0.958333	Inf	0.398323	0.930756	0	0	0	0	0	0	0	0	0
	Ddr2	0.927419	Inf	0.345551	0.958695	0.958333	Inf	0.398323	0.866754	0.958333	Inf	0.398323	0.905296	0.958333	Inf	0.398323	0.930756	0	0	0	0	0	0	0	0	0
	Eif2s1	0.927419	Inf	0.345551	0.958695	0.958333	Inf	0.398323	0.866754	0.958333	Inf	0.398323	0.905296	0.958333	Inf	0.398323	0.930756	0	0	0	0	0	0	0	0	0
	Extl3	0.927419	Inf	0.345551	0.958695	0.958333	Inf	0.398323	0.866754	0.958333	Inf	0.398323	0.905296	0.958333	Inf	0.398323	0.930756	0	0	0	0	0	0	0	0	0
	Faim	0.927419	Inf	0.345551	0.958695	0.958333	Inf	0.398323	0.866754	0.958333	Inf	0.398323	0.905296	0.958333	Inf	0.398323	0.930756	0	0	0	0	0	0	0	0	0
	Fam114a1	0.927419	Inf	0.345551	0.958695	0.958333	Inf	0.398323	0.866754	0.958333	Inf	0.398323	0.905296	0.958333	Inf	0.398323	0.930756	0	0	0	0	0	0	0	0	0
	Fam126a	0.927419	Inf	0.345551	0.958695	0.958333	Inf	0.398323	0.866754	0.958333	Inf	0.398323	0.905296	0.958333	Inf	0.398323	0.930756	0	0	0	0	0	0	0	0	0
	Gm10075	0.927419	Inf	0.345551	0.958695	0.958333	Inf	0.398323	0.866754	0.958333	Inf	0.398323	0.905296	0.958333	Inf	0.398323	0.930756	0	0	0	0	0	0	0	0	0
	Gm12751	0.927419	Inf	0.345551	0.958695	0.958333	Inf	0.398323	0.866754	0.958333	Inf	0.398323	0.905296	0.958333	Inf	0.398323	0.930756	0	0	0	0	0	0	0	0	0
	Gm13217	0.927419	Inf	0.345551	0.958695	0.958333	Inf	0.398323	0.866754	0.958333	Inf	0.398323	0.905296	0.958333	Inf	0.398323	0.930756	0	0	0	0	0	0	0	0	0
	Gm13771	0.927419	Inf	0.345551	0.958695	0.958333	Inf	0.398323	0.866754	0.958333	Inf	0.398323	0.905296	0.958333	Inf	0.398323	0.930756	0	0	0	0	0	0	0	0	0
	Gm20530	0.927419	Inf	0.345551	0.958695	0.958333	Inf	0.398323	0.866754	0.958333	Inf	0.398323	0.905296	0.958333	Inf	0.398323	0.930756	0	0	0	0	0	0	0	0	0
	Gm23111	0.927419	Inf	0.345551	0.958695	0.958333	Inf	0.398323	0.866754	0.958333	Inf	0.398323	0.905296	0.958333	Inf	0.398323	0.930756	0	0	0	0	0	0	0	0	0
	Gm25576	0.927419	Inf	0.345551	0.958695	0.958333	Inf	0.398323	0.866754	0.958333	Inf	0.398323	0.905296	0.958333	Inf	0.398323	0.930756	0	0	0	0	0	0	0	0	0
	Gm4149	0.927419	Inf	0.345551	0.958695	0.958333	Inf	0.398323	0.866754	0.958333	Inf	0.398323	0.905296	0.958333	Inf	0.398323	0.930756	0	0	0	0	0	0	0	0	0
	Gm5898	0.927419	Inf	0.345551	0.958695	0.958333	Inf	0.398323	0.866754	0.958333	Inf	0.398323	0.905296	0.958333	Inf	0.398323	0.930756	0	0	0	0	0	0	0	0	0
	Gm5900	0.927419	Inf	0.345551	0.958695	0.958333	Inf	0.398323	0.866754	0.958333	Inf	0.398323	0.905296	0.958333	Inf	0.398323	0.930756	0	0	0	0	0	0	0	0	0
	Gm7335	0.927419	Inf	0.345551	0.958695	0.958333	Inf	0.398323	0.866754	0.958333	Inf	0.398323	0.905296	0.958333	Inf	0.398323	0.930756	0	0	0	0	0	0	0	0	0
	Gm8258	0.927419	Inf	0.345551	0.958695	0.958333	Inf	0.398323	0.866754	0.958333	Inf	0.398323	0.905296	0.958333	Inf	0.398323	0.930756	0	0	0	0	0	0	0	0	0
	Gm8815	0.927419	Inf	0.345551	0.958695	0.958333	Inf	0.398323	0.866754	0.958333	Inf	0.398323	0.905296	0.958333	Inf	0.398323	0.930756	0	0	0	0	0	0	0	0	0
	Gm8878	0.927419	Inf	0.345551	0.958695	0.958333	Inf	0.398323	0.866754	0.958333	Inf	0.398323	0.905296	0.958333	Inf	0.398323	0.930756	0	0	0	0	0	0	0	0	0
	H2-Bl	0.927419	Inf	0.345551	0.958695	0.958333	Inf	0.398323	0.866754	0.958333	Inf	0.398323	0.905296	0.958333	Inf	0.398323	0.930756	0	0	0	0	0	0	0	0	0
	Ipo11	0.927419	Inf	0.345551	0.958695	0.958333	Inf	0.398323	0.866754	0.958333	Inf	0.398323	0.905296	0.958333	Inf	0.398323	0.930756	0	0	0	0	0	0	0	0	0
	Lamtor3	0.927419	Inf	0.345551	0.958695	0.958333	Inf	0.398323	0.866754	0.958333	Inf	0.398323	0.905296	0.958333	Inf	0.398323	0.930756	0	0	0	0	0	0	0	0	0
	Mex3c	0.927419	Inf	0.345551	0.958695	0.958333	Inf	0.398323	0.866754	0.958333	Inf	0.398323	0.905296	0.958333	Inf	0.398323	0.930756	0	0	0	0	0	0	0	0	0
	Mir5105	0.927419	Inf	0.345551	0.958695	0.958333	Inf	0.398323	0.866754	0.958333	Inf	0.398323	0.905296	0.958333	Inf	0.398323	0.930756	0	0	0	0	0	0	0	0	0
	Mir5115	0.927419	Inf	0.345551	0.958695	0.958333	Inf	0.398323	0.866754	0.958333	Inf	0.398323	0.905296	0.958333	Inf	0.398323	0.930756	0	0	0	0	0	0	0	0	0
	Mir682	0.927419	Inf	0.345551	0.958695	0.958333	Inf	0.398323	0.866754	0.958333	Inf	0.398323	0.905296	0.958333	Inf	0.398323	0.930756	0	0	0	0	0	0	0	0	0
	Mplkip	0.927419	Inf	0.345551	0.958695	0.958333	Inf	0.398323	0.866754	0.958333	Inf	0.398323	0.905296	0.958333	Inf	0.398323	0.930756	0	0	0	0	0	0	0	0	0
	Mrpl49	0.927419	Inf	0.345551	0.958695	0.958333	Inf	0.398323	0.866754	0.958333	Inf	0.398323	0.905296	0.958333	Inf	0.398323	0.930756	0	0	0	0	0	0	0	0	0
	Ndufs1	0.927419	Inf	0.345551	0.958695	0.958333	Inf	0.398323	0.866754	0.958333	Inf	0.398323	0.905296	0.958333	Inf	0.398323	0.930756	0	0	0	0	0	0	0	0	0
	Nfix	0.927419	Inf	0.345551	0.958695	0.958333	Inf	0.398323	0.866754	0.958333	Inf	0.398323	0.905296	0.958333	Inf	0.398323	0.930756	0	0	0	0	0	0	0	0	0
	Nsf	0.927419	Inf	0.345551	0.958695	0.958333	Inf	0.398323	0.866754	0.958333	Inf	0.398323	0.905296	0.958333	Inf	0.398323	0.930756	0	0	0	0	0	0	0	0	0
	Nudt9	0.927419	Inf	0.345551	0.958695	0.958333	Inf	0.398323	0.866754	0.958333	Inf	0.398323	0.905296	0.958333	Inf	0.398323	0.930756	0	0	0	0	0	0	0	0	0
	Ormdl1	0.927419	Inf	0.345551	0.958695	0.958333	Inf	0.398323	0.866754	0.958333	Inf	0.398323	0.905296	0.958333	Inf	0.398323	0.930756	0	0	0	0	0	0	0	0	0
	Pafah1b2	0.927419	Inf	0.345551	0.958695	0.958333	Inf	0.398323	0.866754	0.958333	Inf	0.398323	0.905296	0.958333	Inf	0.398323	0.930756	0	0	0	0	0	0	0	0	0
	Papd4	0.927419	Inf	0.345551	0.958695	0.958333	Inf	0.398323	0.866754	0.958333	Inf	0.398323	0.905296	0.958333	Inf	0.398323	0.930756	0	0	0	0	0	0	0	0	0
	Pcmtd1	0.927419	Inf	0.345551	0.958695	0.958333	Inf	0.398323	0.866754	0.958333	Inf	0.398323	0.905296	0.958333	Inf	0.398323	0.930756	0	0	0	0	0	0	0	0	0
	Phf5a	0.927419	Inf	0.345551	0.958695	0.958333	Inf	0.398323	0.866754	0.958333	Inf	0.398323	0.905296	0.958333	Inf	0.398323	0.930756	0	0	0	0	0	0	0	0	0
	Ppid	0.927419	Inf	0.345551	0.958695	0.958333	Inf	0.398323	0.866754	0.958333	Inf	0.398323	0.905296	0.958333	Inf	0.398323	0.930756	0	0	0	0	0	0	0	0	0
	Ppm1b	0.927419	Inf	0.345551	0.958695	0.958333	Inf	0.398323	0.866754	0.958333	Inf	0.398323	0.905296	0.958333	Inf	0.398323	0.930756	0	0	0	0	0	0	0	0	0
	Prpsap2	0.927419	Inf	0.345551	0.958695	0.958333	Inf	0.398323	0.866754	0.958333	Inf	0.398323	0.905296	0.958333	Inf	0.398323	0.930756	0	0	0	0	0	0	0	0	0
	Ptk2	0.927419	Inf	0.345551	0.958695	0.958333	Inf	0.398323	0.866754	0.958333	Inf	0.398323	0.905296	0.958333	Inf	0.398323	0.930756	0	0	0	0	0	0	0	0	0
	Rap1gds1	0.927419	Inf	0.345551	0.958695	0.958333	Inf	0.398323	0.866754	0.958333	Inf	0.398323	0.905296	0.958333	Inf	0.398323	0.930756	0	0	0	0	0	0	0	0	0
	Rcc2	0.927419	Inf	0.345551	0.958695	0.958333	Inf	0.398323	0.866754	0.958333	Inf	0.398323	0.905296	0.958333	Inf	0.398323	0.930756	0	0	0	0	0	0	0	0	0
	Rnf145	0.927419	Inf	0.345551	0.958695	0.958333	Inf	0.398323	0.866754	0.958333	Inf	0.398323	0.905296	0.958333	Inf	0.398323	0.930756	0	0	0	0	0	0	0	0	0
	Rock1	0.927419	Inf	0.345551	0.958695	0.958333	Inf	0.398323	0.866754	0.958333	Inf	0.398323	0.905296	0.958333	Inf	0.398323	0.930756	0	0	0	0	0	0	0	0	0
	Rpl19-ps11	0.927419	Inf	0.345551	0.958695	0.958333	Inf	0.398323	0.866754	0.958333	Inf	0.398323	0.905296	0.958333	Inf	0.398323	0.930756	0	0	0	0	0	0	0	0	0
	Rprd1b	0.927419	Inf	0.345551	0.958695	0.958333	Inf	0.398323	0.866754	0.958333	Inf	0.398323	0.905296	0.958333	Inf	0.398323	0.930756	0	0	0	0	0	0	0	0	0
	Rps15	0.927419	Inf	0.345551	0.958695	0.958333	Inf	0.398323	0.866754	0.958333	Inf	0.398323	0.905296	0.958333	Inf	0.398323	0.930756	0	0	0	0	0	0	0	0	0
	Rps4y2	0.927419	Inf	0.345551	0.958695	0.958333	Inf	0.398323	0.866754	0.958333	Inf	0.398323	0.905296	0.958333	Inf	0.398323	0.930756	0	0	0	0	0	0	0	0	0
	Serf1	0.927419	Inf	0.345551	0.958695	0.958333	Inf	0.398323	0.866754	0.958333	Inf	0.398323	0.905296	0.958333	Inf	0.398323	0.930756	0	0	0	0	0	0	0	0	0
	Slc5a6	0.927419	Inf	0.345551	0.958695	0.958333	Inf	0.398323	0.866754	0.958333	Inf	0.398323	0.905296	0.958333	Inf	0.398323	0.930756	0	0	0	0	0	0	0	0	0
	Smc6	0.927419	Inf	0.345551	0.958695	0.958333	Inf	0.398323	0.866754	0.958333	Inf	0.398323	0.905296	0.958333	Inf	0.398323	0.930756	0	0	0	0	0	0	0	0	0
	Taf5l	0.927419	Inf	0.345551	0.958695	0.958333	Inf	0.398323	0.866754	0.958333	Inf	0.398323	0.905296	0.958333	Inf	0.398323	0.930756	0	0	0	0	0	0	0	0	0
	Tbc1d14	0.927419	Inf	0.345551	0.958695	0.958333	Inf	0.398323	0.866754	0.958333	Inf	0.398323	0.905296	0.958333	Inf	0.398323	0.930756	0	0	0	0	0	0	0	0	0
	Thrap3	0.927419	Inf	0.345551	0.958695	0.958333	Inf	0.398323	0.866754	0.958333	Inf	0.398323	0.905296	0.958333	Inf	0.398323	0.930756	0	0	0	0	0	0	0	0	0
	Tial1	0.927419	Inf	0.345551	0.958695	0.958333	Inf	0.398323	0.866754	0.958333	Inf	0.398323	0.905296	0.958333	Inf	0.398323	0.930756	0	0	0	0	0	0	0	0	0
	Tmbim6	0.927419	Inf	0.345551	0.958695	0.958333	Inf	0.398323	0.866754	0.958333	Inf	0.398323	0.905296	0.958333	Inf	0.398323	0.930756	0	0	0	0	0	0	0	0	0
	Tomm5	0.927419	Inf	0.345551	0.958695	0.958333	Inf	0.398323	0.866754	0.958333	Inf	0.398323	0.905296	0.958333	Inf	0.398323	0.930756	0	0	0	0	0	0	0	0	0
	Utp15	0.927419	Inf	0.345551	0.958695	0.958333	Inf	0.398323	0.866754	0.958333	Inf	0.398323	0.905296	0.958333	Inf	0.398323	0.930756	0	0	0	0	0	0	0	0	0
	Vapb	0.927419	Inf	0.345551	0.958695	0.958333	Inf	0.398323	0.866754	0.958333	Inf	0.398323	0.905296	0.958333	Inf	0.398323	0.930756	0	0	0	0	0	0	0	0	0
	Wash	0.927419	Inf	0.345551	0.958695	0.958333	Inf	0.398323	0.866754	0.958333	Inf	0.398323	0.905296	0.958333	Inf	0.398323	0.930756	0	0	0	0	0	0	0	0	0
	Wdr11	0.927419	Inf	0.345551	0.958695	0.958333	Inf	0.398323	0.866754	0.958333	Inf	0.398323	0.905296	0.958333	Inf	0.398323	0.930756	0	0	0	0	0	0	0	0	0
	Wnk1	0.927419	Inf	0.345551	0.958695	0.958333	Inf	0.398323	0.866754	0.958333	Inf	0.398323	0.905296	0.958333	Inf	0.398323	0.930756	0	0	0	0	0	0	0	0	0
	Yae1d1	0.927419	Inf	0.345551	0.958695	0.958333	Inf	0.398323	0.866754	0.958333	Inf	0.398323	0.905296	0.958333	Inf	0.398323	0.930756	0	0	0	0	0	0	0	0	0
	Ywhah	0.927419	Inf	0.345551	0.958695	0.958333	Inf	0.398323	0.866754	0.958333	Inf	0.398323	0.905296	0.958333	Inf	0.398323	0.930756	0	0	0	0	0	0	0	0	0
	Zfp212	0.927419	Inf	0.345551	0.958695	0.958333	Inf	0.398323	0.866754	0.958333	Inf	0.398323	0.905296	0.958333	Inf	0.398323	0.930756	0	0	0	0	0	0	0	0	0
	Enpp2	0.925656	0.0277159	0.346001	0.958697	1.57395	0.0893205	0.228742	0.808866	0.46145	0.0276334	0.636079	0.954565	2.70077	0.161732	0.0883974	0.912445	-0.012212	-0.0487486	0.0203837	0.00396603	-0.0254679	-0.0122224	-0.010751	-0.0231479	-0.0025421
	Ptprd	0.530909	0.018651	0.473579	0.958716	0.651283	0.0447838	0.530726	0.929589	0.465479	0.0327049	0.63362	0.953322	1.35049	0.0948861	0.278901	0.931172	-0.0197869	-0.00911932	-0.094081	0.00696919	0.0101945	-0.0508035	0.00858187	0.0029654	-0.0419433
	Syn2	0.940639	0.0583456	0.347493	0.958761	0.0906099	0.0112406	0.91387	0.991026	NA	NA	NA	NA	NA	NA	NA	NA	-0.0895054	-0.0666667	-0.0331762	0.0845121	NA	-0.0532705	-0.132711	-0.00409197	-0.190885
	Nlrp1a	0.750404	0.272834	0.477665	0.958793	NA	NA	NA	NA	NA	NA	NA	NA	NA	NA	NA	NA	0.0711264	NA	NA	NA	NA	NA	NA	NA	NA
	Rnf168	1.47966	0.0375965	0.236165	0.95882	4.07428	0.219041	0.0305726	0.481646	1.77757	0.0903325	0.191496	0.824507	1.58643	0.0806191	0.226246	0.938752	0.0214946	0.0676997	-0.014666	0.0483706	0.00353608	0.0201964	0.0259533	0.0513465	-0.00556495
	Ccar1	1.4759	0.0425002	0.237295	0.958839	1.1565	0.078374	0.332985	0.862245	2.80795	0.161716	0.0820156	0.686567	1.66107	0.0956645	0.212885	0.928176	-0.0488329	0.0856754	-0.0419619	-0.0681478	-0.13727	0.0127398	-0.102709	-0.00222355	-0.089616
	Gm15943	0.532089	0.017209	0.473788	0.95885	1.67228	0.107457	0.211876	0.793991	1.74116	0.112626	0.199688	0.817905	1.28016	0.0828063	0.298814	0.931785	-0.0338351	-0.0288844	0.11665	-0.162009	-0.0514381	0.0353958	-0.101127	-0.10584	0.032606
	Pold3	0.546451	0.0409729	0.473984	0.958863	0.395219	0.0592671	0.681985	0.971841	NA	NA	NA	NA	NA	NA	NA	NA	-0.0590465	NA	-0.10585	NA	NA	-0.0326559	-0.0895914	-0.0209092	-0.0988632
	Map1b	0.531779	0.0204469	0.473221	0.958874	0.554415	0.0419636	0.581895	0.946954	0.115099	0.00885107	0.891788	0.987984	0.568538	0.0437204	0.574112	0.9704	-0.0208665	-0.0281372	-0.0439097	-0.0401152	0.0275919	-0.0346782	-0.00626168	-0.0348296	-0.00815889
	Fxyd6	0.522829	0.0159476	0.477255	0.958877	0.685748	0.0439208	0.514159	0.926614	3.10558	0.189456	0.0648663	0.643426	1.33932	0.0817056	0.282563	0.927431	0.0402265	0.136178	0.074669	0.173905	-0.200798	0.101567	-0.0134465	0.161859	-0.0715376
	Rnf2	0.921037	0.0331516	0.347184	0.958891	0.338209	0.0224219	0.716533	0.97496	1.05396	0.075872	0.364794	0.903289	0.538592	0.0387719	0.590751	0.97363	0.0201154	0.0389459	0.00916295	0.0236246	0.00672956	0.0265311	0.0151771	0.0311817	0.00794625
	Tmem33	1.46351	0.0381855	0.238661	0.958922	0.233053	0.0104385	0.793959	0.980441	0.72399	0.0377804	0.495537	0.933526	5.97431	0.311761	0.00813626	0.851282	-0.0137711	-0.0113159	-0.0203238	-0.0233054	-0.00597054	-0.0123115	-0.014638	-0.0154042	-0.0131472
	Akt2	0.516579	0.0208444	0.479544	0.958924	0.133139	0.0109644	0.876013	0.988979	0.23007	0.018567	0.796285	0.975614	0.269838	0.0217763	0.765887	0.991023	-0.0125411	-0.00957414	-0.0134547	-0.00700321	-0.0239492	-0.00998883	-0.0154762	-0.00663836	-0.0187019
	Nipa1	0.531028	0.016741	0.47353	0.958947	0.847608	0.0490875	0.44139	0.902325	2.1294	0.134262	0.141756	0.776652	1.11754	0.0704626	0.344204	0.935279	-0.0332043	-0.137567	0.12282	-0.111964	-0.0167593	0.00354182	-0.0643618	-0.123015	0.0530304
	Tspan2	0.531234	0.0241206	0.474538	0.958961	0.129723	0.00826125	0.879072	0.987779	0.461164	0.0418783	0.637088	0.95376	0.155516	0.0141224	0.856999	0.996588	0.0378494	0.0251692	-0.00614022	0.135428	-0.0142578	0.00688445	0.0605851	0.0936101	-0.0104255
	Plod2	0.528119	0.0173681	0.474731	0.958974	2.78696	0.18407	0.082455	0.658118	0.100865	0.0066342	0.904453	0.988616	0.551844	0.0362966	0.583324	0.973043	-0.0172232	-0.0054615	-0.0594114	-0.000658913	0.00743484	-0.0356837	0.00338796	-0.00814793	-0.0259883
	Gm11273	0.927703	0.0367135	0.345929	0.95901	0.558652	0.044217	0.579883	0.946112	0.323273	0.0255869	0.727156	0.971513	0.288564	0.0228397	0.752132	0.989542	0.0284336	-0.0130174	0.0504671	0.0186462	0.0505639	0.0195961	0.0372711	0.00281441	0.0505155
	9630028H03Rik	0.526071	0.0142896	0.475908	0.959037	1.22273	0.0833204	0.313666	0.847474	4.74897	0.25799	0.0192995	0.463902	1.17281	0.0637133	0.328112	0.930983	-0.0320798	-0.248162	0.0632907	-0.090771	0.0933028	-0.0701892	0.0012659	-0.158224	0.0782967
	Anapc16	0.516696	0.0186108	0.479494	0.959092	1.04877	0.0748875	0.366534	0.87346	0.605722	0.0436349	0.554156	0.941035	0.468769	0.033769	0.631621	0.974116	-0.0182201	-0.0504149	-0.0515949	0.059867	-0.0352268	-0.0495736	0.0123201	0.00797789	-0.0434109
	Fth1	0.566896	0.0652174	0.473067	0.959092	NA	NA	NA	NA	0.062756	0.0144393	0.93963	0.995276	NA	NA	NA	NA	0.0892393	-0.0254934	0.200649	NA	NA	0.0954868	NA	0.0402961	0.12391
	Cyp4f16	0.522168	0.0157449	0.477202	0.959106	2.71979	0.179792	0.0870471	0.662213	2.09656	0.126435	0.145744	0.782236	0.00469272	0.000282999	0.995319	1.00232	-0.0215939	0.0623724	0.0362499	-0.0696731	-0.0924856	0.0442578	-0.0810794	-0.0106949	-0.0281179
	Chd6	0.941613	0.0607269	0.349572	0.959109	NA	NA	NA	NA	0.782036	0.100871	0.477852	0.929831	NA	NA	NA	NA	0.154586	NA	NA	-0.245724	0.264891	NA	0.0682078	-0.109901	0.29036
	Prpf18	0.523452	0.016811	0.476667	0.959117	0.534463	0.0340269	0.593086	0.952454	0.014731	0.000946185	0.985386	0.998575	3.25787	0.209256	0.0567875	0.908591	0.0163568	0.0202902	0.0371315	0.025244	-0.0115571	0.0250623	0.00684344	0.0203453	0.0127872
	Zfp322a	0.517975	0.0168089	0.478957	0.959133	2.4039	0.159295	0.112708	0.702564	0.422002	0.0273889	0.660708	0.959611	0.822916	0.053409	0.451669	0.952983	0.0105843	-0.0103322	0.0202938	0.0298577	-0.00751651	0.00773153	0.0111706	0.0142469	0.00638865
	Gm9574	0.531838	0.0168137	0.473197	0.959135	1.61029	0.0905894	0.221556	0.801623	2.31125	0.146137	0.121716	0.755018	0.128185	0.00810497	0.880314	0.994588	0.014257	-0.00565912	-0.0271324	0.0381057	0.0537932	-0.0204868	0.0459495	0.0182583	0.0133304
	Mgll	0.927128	0.0279459	0.345625	0.959142	2.77636	0.150251	0.0831619	0.653513	1.75878	0.106028	0.194641	0.825405	0.0892106	0.00537805	0.914968	0.99952	-0.00716797	-0.0141518	0.0107343	-0.0241203	-0.00146678	-1.17699e-05	-0.0127935	-0.0203915	0.00463374
	Inpp4a	0.545455	Inf	0.478997	0.959146	NA	NA	NA	NA	NA	NA	NA	NA	NA	NA	NA	NA	0	NA	NA	NA	NA	NA	0	NA	NA
	Sh3pxd2a	0.92164	0.0355158	0.347478	0.959154	0.204312	0.0117828	0.816737	0.979149	0.833708	0.0642545	0.447703	0.920341	0.476243	0.0367044	0.627368	0.974423	-0.0201624	-0.0297105	-0.0336538	0.0164874	-0.0361596	-0.0319638	-0.00983614	-0.00331174	-0.0349067
	Kdm6b	0.926384	0.0284964	0.345815	0.959158	2.5773	0.145159	0.0977356	0.677386	1.06171	0.065318	0.362214	0.904388	0.652216	0.0401254	0.530258	0.965669	0.0279693	0.0152755	0.0785438	-0.0241024	0.039751	0.0538259	0.00782434	-0.00767163	0.0591474
	Art3	0.528648	0.0177542	0.474512	0.959161	1.96493	0.137022	0.162996	0.761466	0.346631	0.0232826	0.710697	0.970068	0.812094	0.0545469	0.456256	0.954616	0.0150621	0.0257521	-0.00193325	-0.014818	0.0433657	0.0130697	0.0142739	0.00804418	0.0207162
	Fam76a	0.921322	0.0344705	0.347111	0.959162	0.385028	0.0289222	0.684735	0.972673	0.180861	0.0135335	0.835727	0.979747	0.837368	0.0626588	0.445622	0.953861	0.0160174	0.0398754	0.0125789	-0.0226261	0.0367877	0.0247858	0.00708079	0.00705958	0.0246833
	Cdk14	1.47789	0.0407746	0.236437	0.95917	1.28888	0.0645386	0.294748	0.841903	1.10948	0.0612207	0.346743	0.907662	3.48532	0.192319	0.0476285	0.91157	-0.0154203	0.00722797	0.00650109	-0.0451596	-0.0247289	0.00563643	-0.0349442	-0.0234586	-0.00911392
	Rgmb	0.529179	0.0182119	0.474293	0.959179	0.09944	0.00716509	0.905731	0.994296	1.82451	0.125582	0.18388	0.815339	0.839877	0.0578093	0.444581	0.95423	0.0202526	-0.0110343	0.0684558	0.0363433	-0.0136033	0.0291709	0.01137	0.0162155	0.0274262
	Eml6	0.516211	0.0181355	0.480024	0.959201	0.758759	0.0550295	0.480113	0.9181	1.11957	0.0786655	0.344318	0.906578	1.09562	0.0769823	0.351894	0.938321	-0.0247053	-0.00968018	-0.0720188	0.0108228	-0.0417582	-0.0365418	-0.0128688	0.0079471	-0.0573578
	Phf3	1.46438	0.0450804	0.238525	0.959216	1.06279	0.0654739	0.361857	0.872285	1.37334	0.0845558	0.273259	0.876687	1.57353	0.0968812	0.228827	0.93643	0.0131334	0.0377221	0.0162088	0.0171277	-0.0155086	0.0256593	0.000809558	0.0259563	0.000350127
	Smurf2	0.523023	0.0140441	0.476846	0.95922	1.19624	0.0471955	0.32045	0.848787	5.15218	0.27669	0.0141614	0.418788	0.510846	0.0274342	0.606637	0.975716	-0.0289642	-0.049212	0.0877902	-0.220277	0.0598901	0.028016	-0.0801932	-0.144316	0.0738401
	Deptor	0.523844	0.0143607	0.476504	0.959226	1.51684	0.0801811	0.240554	0.81696	2.32707	0.127589	0.120124	0.757319	2.63296	0.14436	0.0933995	0.903673	-0.0100215	-0.0589884	0.0230839	0.00499673	-0.0128931	-0.0181215	-0.00394817	-0.0243954	0.00509544
	Gm9988	0.757486	0.274702	0.47588	0.959237	NA	NA	NA	NA	NA	NA	NA	NA	NA	NA	NA	NA	-0.243792	NA	NA	NA	NA	NA	NA	NA	NA
	Prr3	1.47107	0.0432533	0.237488	0.959252	0.46509	0.0345051	0.633858	0.957288	2.80877	0.16517	0.0810213	0.68593	1.49589	0.0879663	0.24505	0.93506	-0.0533333	-0.068592	0.0178772	-0.00626687	-0.132508	-0.0334774	-0.0693874	-0.042044	-0.0573153
	Cpeb3	0.516951	0.0184101	0.479387	0.95926	0.662453	0.041348	0.525148	0.930427	1.383	0.0985051	0.270912	0.871489	0.235965	0.0168068	0.791697	0.992719	-0.0180969	0.013566	-0.0979844	0.0337645	-0.0139227	-0.0480147	0.00992089	0.0236137	-0.0559535
	Prune2	0.519302	0.0139696	0.478401	0.959265	2.30659	0.120893	0.122189	0.721076	1.94498	0.104643	0.1658	0.806648	2.57562	0.138573	0.0978694	0.900386	0.0303112	0.0213488	0.108401	-0.000893102	0.00322628	0.0555853	0.00116659	0.00857246	0.0558138
	Ppargc1b	0.937586	0.050486	0.346474	0.959267	0.316815	0.0341189	0.732675	0.976614	NA	NA	NA	NA	NA	NA	NA	NA	0.0745315	NA	NA	0.0471766	0.0313955	0.159993	0.0318006	0.163578	-0.0017337
	Nt5m	0.52364	0.0258656	0.478109	0.95927	0.360501	0.0356145	0.701995	0.972898	NA	NA	NA	NA	NA	NA	NA	NA	-0.0840639	-0.0443486	-0.102362	-0.283664	NA	-0.0597336	-0.145838	-0.164006	0.0126409
	Neo1	0.518828	0.0232192	0.48011	0.959274	0.212081	0.0169961	0.810788	0.979843	0.95327	0.0853236	0.403161	0.909216	0.247641	0.0221654	0.783121	0.994221	-0.0543267	-0.159269	-0.0579433	-0.137095	0.107872	-0.11345	-0.0146117	-0.146598	0.0418316
	Atp5s	1.47577	0.0467022	0.236762	0.959288	1.52851	0.105302	0.238086	0.818277	1.11754	0.0707313	0.344204	0.906778	0.91587	0.0579672	0.414274	0.936761	-0.0409054	0.0389714	0.0103141	-0.0179956	-0.176691	0.0199648	-0.0973433	0.00552167	-0.0831884
	Msi2	0.912217	0.0323354	0.349458	0.959297	0.776346	0.056981	0.47177	0.914624	0.789659	0.0559822	0.465926	0.924946	0.58341	0.0413604	0.566038	0.967959	-0.0130303	-0.00939661	0.0168081	-0.0315317	-0.0273166	0.00458433	-0.0294241	-0.0203206	-0.00525427
	Zfp52	0.527645	0.0178302	0.474927	0.95932	2.04637	0.145797	0.152076	0.749595	0.928353	0.062742	0.409514	0.911173	0.0578055	0.00390674	0.94397	1.00112	0.0163786	-0.0545066	-0.011615	0.0340286	0.0856055	-0.0295042	0.0598171	-0.00700016	0.0369952
	Cxcr6	0.515816	0.0164473	0.479864	0.959327	1.51954	0.0976528	0.23998	0.817877	1.25621	0.0801106	0.303548	0.894008	1.14722	0.0731607	0.335027	0.931287	0.0250668	-0.0281336	-0.044791	0.143883	0.0212264	-0.0372841	0.0825547	0.0617124	-0.0117823
	Galnt10	0.910758	0.0350829	0.349837	0.95933	0.0240083	0.00158157	0.976302	0.999085	0.296964	0.0228785	0.745877	0.971858	0.703713	0.0542149	0.505088	0.961219	0.0275358	0.0793038	-0.00788272	-0.00343268	0.0463779	0.0340739	0.0214726	0.0349692	0.0192476
	Mipol1	0.567406	0.0502923	0.475858	0.959346	1.85737	0.329259	0.225375	0.805381	NA	NA	NA	NA	NA	NA	NA	NA	0.0870131	NA	NA	NA	-0.0792989	0.233982	-0.120477	NA	0.198622
	Smarcc2	0.532277	0.0216812	0.473016	0.959354	0.0531388	0.00424562	0.948364	0.994165	0.0528324	0.00430403	0.948654	0.996164	0.402985	0.0328295	0.67295	0.975355	-0.00619356	-0.0178399	-0.0005005	0.00213836	-0.00941266	-0.00886963	-0.00363715	-0.00734495	-0.00495658
	Lgals3bp	0.522276	0.0182744	0.477157	0.959366	0.445491	0.0313864	0.645921	0.96299	0.990657	0.0693258	0.386629	0.919464	1.09259	0.076459	0.352129	0.936785	0.0128357	-0.00567781	0.0558802	0.0185793	-0.0170338	0.0249571	0.000772714	0.00745202	0.0194232
	Zc3h15	0.515511	0.0177901	0.479993	0.959399	0.665367	0.0449669	0.523703	0.928898	1.11771	0.0771436	0.34415	0.907125	0.947885	0.0654223	0.402185	0.932396	0.0145079	0.0748761	-0.0246336	0.00959044	-0.000240375	0.0235707	0.00467503	0.0424714	-0.012437
	Cyb5r4	0.522531	0.0177044	0.477051	0.959414	0.81525	0.0506631	0.454913	0.90994	0.612895	0.0415322	0.550394	0.940409	1.56768	0.106232	0.230009	0.932826	-0.0111421	-0.0130484	0.000975454	-0.0112274	-0.0176321	-0.0062892	-0.0144297	-0.0153752	-0.00832834
	Cd300ld	0.935065	Inf	0.346364	0.959415	0.350649	Inf	0.708935	0.973659	NA	NA	NA	NA	NA	NA	NA	NA	0	0	0	0	NA	0	0	0	0
	Sord	0.517988	0.0152262	0.478951	0.959422	0.36214	0.0163804	0.700084	0.973796	4.05063	0.238136	0.0311117	0.551071	0.837973	0.0492643	0.44537	0.954223	0.0144678	0.0519248	0.0065713	-0.0289439	0.0248679	0.0321949	-0.00203798	0.00913961	0.0157196
	Fdx1	0.576491	0.0530823	0.476451	0.959425	2.14192	0.394448	0.198604	0.792441	NA	NA	NA	NA	NA	NA	NA	NA	0.0373049	NA	0.0203195	NA	NA	0.0524444	0.0221654	NA	0.0364165
	Pde7b	0.535584	0.0307238	0.478318	0.959433	NA	NA	NA	NA	2.44832	0.280896	0.128317	0.761414	NA	NA	NA	NA	0.0777108	NA	NA	-0.0452048	-0.00711938	NA	-0.00466808	0.084725	0.0139649
	Gm10269	0.519645	0.017145	0.479335	0.959459	3.02858	0.21121	0.0709626	0.621237	1.00695	0.0664462	0.383115	0.921521	0.859036	0.0566856	0.438619	0.951723	-0.0291241	0.0374703	-0.139328	0	0	-0.0534112	0	0.00827763	-0.069664
	Gm16042	0.535348	0.0189959	0.471757	0.959463	1.02008	0.0804723	0.376308	0.875717	1.18461	0.0840679	0.323845	0.899792	0.118768	0.00842853	0.888555	0.996169	-0.0240005	-0.11493	-0.0176308	-0.0446496	0.0624732	-0.0614062	0.00891179	-0.0736776	0.0224212
	Pdk1	0.921699	0.0320326	0.347014	0.959474	0.171707	0.0116667	0.843295	0.983702	1.44837	0.100673	0.255594	0.859036	0.805955	0.0560201	0.45888	0.954007	-0.0111979	0.00355174	-0.0369082	0.00591819	-0.0151859	-0.0182707	-0.00463385	0.00380358	-0.026047
	Kpnb1	0.52435	0.0161929	0.476294	0.959504	0.143707	0.0127645	0.866913	0.987351	2.64822	0.163564	0.0922477	0.716261	1.63665	0.101086	0.216497	0.931714	0.00558529	0.0319816	-0.0151489	0.0144796	-0.00189609	0.00511111	0.00629178	0.0213385	-0.00852251
	Trnp1	0.554698	0.0579266	0.475402	0.959509	0.0105885	0.00221151	0.98948	0.999739	NA	NA	NA	NA	NA	NA	NA	NA	0.152372	NA	NA	NA	0.18634	0.14345	0.163492	NA	0.160361
	Ceacam1	0.535565	0.0139101	0.471668	0.959511	0.772981	0.035844	0.47326	0.913986	3.13593	0.162897	0.062473	0.635787	3.57427	0.185667	0.0444946	0.907048	-0.0303793	-0.0205409	-0.044005	-0.232314	0.186886	-0.0350514	-0.0227144	-0.138987	0.0714403
	Mlf1ip	0.91808	0.0411188	0.34942	0.959526	0.164464	0.0111135	0.849484	0.984675	0.339306	0.0303935	0.716285	0.969795	0.200954	0.0180006	0.819581	0.993406	0.0617968	0.128835	0.0574797	0.00311926	0.0913525	0.0878877	0.0472359	0.0464052	0.0745958
	Actn1	0.833272	0.0304638	0.370798	0.95953	0.438994	0.0344183	0.649975	0.963427	0.535205	0.0391333	0.592666	0.949679	0.785601	0.0574419	0.467699	0.95611	0.0111279	-0.0033145	0.0216046	0.0196871	-0.000117316	0.0117806	0.00978488	0.0106944	0.0107437
	Mill2	1	0.111111	0.346594	0.959531	NA	NA	NA	NA	NA	NA	NA	NA	NA	NA	NA	NA	0.0764706	NA	NA	NA	0.191176	NA	0.0955882	NA	0.191176
	Rpl14	0.923233	0.0304322	0.346621	0.959547	0.91385	0.0631638	0.41505	0.881239	1.74632	0.115126	0.196758	0.821594	0.546909	0.0360551	0.586078	0.974001	-0.00821527	-0.00550867	-0.0174835	-0.0109628	0.0042064	-0.0126664	-0.00337821	-0.00881739	-0.00663855
	Gm6659	0.539597	0.0212576	0.471569	0.959591	0.910651	0.0800741	0.419116	0.882143	0.487961	0.0384467	0.621362	0.955527	1.52347	0.120035	0.243416	0.932655	0.0228433	0.081033	0.00990349	-0.0392606	0.0466968	0.0541889	-0.00416069	0.0212431	0.031995
	4930422G04Rik	0.937698	0.0505786	0.349303	0.959591	1.80087	0.194274	0.201376	0.791418	NA	NA	NA	NA	NA	NA	NA	NA	-0.112264	-0.269407	NA	0.00394366	-0.189294	-0.26344	-0.0926754	-0.082231	-0.167217
	Mgat4b	0.533288	0.0157749	0.472601	0.959591	0.0829928	0.00494141	0.920632	0.990701	4.39041	0.259741	0.0242645	0.495436	0.663002	0.0392238	0.524875	0.96614	0.015995	0.0555691	-0.0163258	0.0155256	0.00297213	0.0228221	0.00924885	0.0360519	-0.00667682
	Ccdc88a	0.832351	0.0251989	0.371058	0.9596	1.49847	0.0967565	0.244492	0.81881	1.26766	0.0767552	0.300431	0.892393	1.83332	0.111005	0.182489	0.922912	0.0116339	0.0307485	0.000608397	-0.0268146	0.0388695	0.0161562	0.00602743	0.0017548	0.0197389
	Chd4	0.922811	0.034264	0.346729	0.959605	0.678889	0.0489523	0.517055	0.929221	0.624627	0.0463849	0.5443	0.938144	0.201263	0.0149458	0.819122	0.99331	-0.0101349	-0.0295784	0.00327697	-0.0126671	-0.00158	-0.0125328	-0.00712354	-0.0216131	0.000848487
	Prosc	0.525427	0.0155088	0.475846	0.959606	0.730253	0.0541962	0.492626	0.920588	2.32968	0.137529	0.119863	0.759085	2.11696	0.124971	0.143253	0.929294	-0.0128851	0.00513276	0.00405972	0.0332052	-0.0901459	0.00475591	-0.0284703	0.0207011	-0.0430431
	Ptprb	0.534036	0.0190855	0.472294	0.95961	0.450273	0.0259094	0.642954	0.96175	1.21689	0.0869792	0.314517	0.901768	0.556436	0.0397721	0.580774	0.971599	0.00358889	0.00254067	-0.00318043	0.0183758	-0.00273847	-0.0010438	0.00781865	0.0108743	-0.00295945
	Ctdsp2	0.913874	0.0317379	0.34903	0.959615	1.17211	0.0779282	0.327539	0.851669	0.675131	0.0468932	0.518894	0.933127	0.593031	0.0411907	0.560881	0.96615	0.00783322	-0.00489404	-0.00529787	0.0370544	0.00240679	-0.00505499	0.0197306	0.017592	-0.00144554
	E2f2	0.626323	0.135383	0.472991	0.959616	NA	NA	NA	NA	NA	NA	NA	NA	NA	NA	NA	NA	-0.12697	NA	NA	NA	NA	-0.276644	NA	-0.167932	NA
	Hnrnpa0	0.922066	0.0298353	0.34692	0.959622	2.25333	0.138083	0.127743	0.730444	1.05532	0.0682942	0.364338	0.903432	0.182924	0.0118377	0.834031	0.995523	0.0146658	0.00807721	0.0655655	-0.0198096	0.00846941	0.0381082	-0.00567008	-0.00896844	0.0370175
	Sgpp1	0.915253	0.0351255	0.348673	0.959623	0.070171	0.00592675	0.932433	0.990179	0.681229	0.0522883	0.515914	0.933671	0.319303	0.0245083	0.729825	0.984981	0.0257126	0.0492612	0.00498873	0.054276	-0.00621573	0.0281958	0.0240301	0.0528	-0.000613498
	Toe1	1.49241	0.0779374	0.238513	0.95964	0.328234	0.0342823	0.724659	0.976865	NA	NA	NA	NA	NA	NA	NA	NA	-0.134977	0.107513	NA	-0.111985	NA	-0.205182	-0.0586257	-0.0325418	-0.283567
	Hmga1-rs1	0.518154	0.0184387	0.478882	0.959651	0.397933	0.0328505	0.676243	0.96978	0.710842	0.0505913	0.501708	0.933456	1.18283	0.084183	0.32437	0.927828	0.0207606	0.0111455	-0.0232655	-0.0260012	0.116309	-0.00566679	0.0451542	-0.00810062	0.046522
	Gpnmb	0.83051	0.0289393	0.371578	0.959685	1.97442	0.13893	0.161681	0.758048	0.107495	0.00749137	0.89853	0.988544	0.351993	0.0245306	0.707008	0.984013	-0.0130009	-0.0165491	-0.0130456	-0.0116389	-0.00839816	-0.0142432	-0.0100186	-0.0150562	-0.0107219
	Slc11a1	0.518331	0.0200439	0.478807	0.959699	0.879944	0.0683108	0.428312	0.893093	0.219007	0.0169381	0.804972	0.977029	0.0717531	0.00554941	0.930968	1.00233	-0.017199	-0.0497691	-0.0238754	0.00775878	-0.00229788	-0.0368404	0.00273045	-0.0205522	-0.0130867
	Tmod3	0.917119	0.030193	0.348192	0.959738	2.27249	0.146487	0.125714	0.725134	0.404281	0.0266191	0.672107	0.962667	0.552309	0.0363657	0.583065	0.973183	-0.0158086	-0.0082832	0.0364158	-0.0373246	-0.0577437	0.0172245	-0.0475342	-0.0223277	-0.0106639
	Rab8b	0.833679	0.0337395	0.370683	0.959746	0.0957016	0.00775554	0.909095	0.992302	0.0825624	0.0066827	0.921026	0.992559	0.259538	0.0210073	0.773637	0.994178	0.0237544	0.0179866	0.0102653	0.04466	0.022164	0.0130536	0.033412	0.0313218	0.0162146
	Flt3	0.61953	0.134111	0.475239	0.959757	NA	NA	NA	NA	NA	NA	NA	NA	NA	NA	NA	NA	0.152095	NA	NA	NA	NA	NA	NA	NA	0.146356
	Slc41a2	0.832864	0.0289486	0.371339	0.959769	0.287207	0.0249571	0.753127	0.975417	1.06463	0.0740084	0.361965	0.9058	1.61697	0.112405	0.221215	0.935511	0.0315003	0.0489364	-0.0449499	0.0272152	0.0934788	0.0053654	0.0576353	0.0409137	0.022087
	Crlf3	0.526513	0.0180716	0.475396	0.959769	0.519463	0.0363964	0.601654	0.95238	1.12406	0.0771625	0.342165	0.908008	1.16067	0.0796757	0.330958	0.930913	-0.0160093	-0.0622146	0.0362278	-0.0353743	-0.0134288	-0.00847071	-0.0244016	-0.0441513	0.0113995
	Cdk8	0.513879	0.0194837	0.480681	0.959796	0.625006	0.0490725	0.544105	0.934024	0.227718	0.0172678	0.798123	0.975335	0.577751	0.0438108	0.569096	0.969735	-0.0133201	-0.0108602	-0.0232803	-0.0410905	0.0189198	-0.0171344	-0.0110854	-0.0250175	-0.00218025
	Dis3l2	1.51809	0.0795705	0.238201	0.959846	1.78026	0.186624	0.204707	0.791766	NA	NA	NA	NA	NA	NA	NA	NA	0.13799	NA	0.233132	-0.14138	0.122328	0.285173	-0.00664663	0.0823416	0.171701
	Dnajc14	0.53586	0.016534	0.471547	0.959853	4.05115	0.249196	0.0310998	0.480997	0.138719	0.00856039	0.871195	0.984963	0.247001	0.0152424	0.783186	0.993839	0.00748563	-0.00361452	-0.0248742	0.0263708	0.0337327	-0.0154351	0.0300517	0.0110747	0.00442926
	Gm26372	0.965157	0.161799	0.371008	0.959854	NA	NA	NA	NA	NA	NA	NA	NA	NA	NA	NA	NA	0.0447645	NA	NA	NA	NA	0.0735458	NA	NA	NA
	Sbsn	1.47674	0.0635024	0.238437	0.959871	0.373221	0.0296464	0.693208	0.973387	0.205641	0.0176859	0.815826	0.979491	0.310176	0.0266763	0.736782	0.986901	-0.08577	-0.199829	-0.022332	-0.0478406	-0.0989875	-0.102245	-0.0734141	-0.099417	-0.0678429
	A530054K11Rik	0.534112	0.0175938	0.472263	0.959872	0.361013	0.0242485	0.70085	0.973293	1.57329	0.103649	0.228876	0.842116	1.47761	0.0973459	0.249049	0.932695	-0.0226467	-0.128124	0.0413106	-0.00485073	-0.00684499	-0.0419706	-0.00584786	-0.0627797	0.0172328
	Arhgdib	1.37822	0.0523016	0.252418	0.959879	0.231825	0.0177742	0.794916	0.980626	0.0285578	0.00216747	0.971881	0.998151	0.726172	0.0551147	0.49452	0.960615	0.0237053	0.0332098	0.0294449	0.0273419	0.0107685	0.0295654	0.0190552	0.0273626	0.0201067
	Elp4	0.526258	0.0159301	0.475831	0.959897	1.22364	0.0835327	0.31341	0.848162	1.58711	0.0960853	0.227057	0.842484	2.44381	0.147951	0.110046	0.901026	0.0258526	0.214246	-0.0675083	-0.0103096	0.0140807	0.0532435	0.00188556	0.0859284	-0.0267138
	Agpat4	0.532354	0.0208012	0.472985	0.959909	0.407895	0.0305652	0.669765	0.97043	0.502976	0.0393066	0.611227	0.952762	0.119157	0.0093119	0.888213	0.996081	-0.0274394	-0.0200523	-0.0841341	0.0236743	-0.0198682	-0.0577505	0.00190302	0.000799851	-0.0520012
	Stc2	0.835568	0.0278975	0.370578	0.959923	0.716622	0.0512746	0.499451	0.920575	2.68445	0.179254	0.0905356	0.714529	0.156821	0.0104717	0.855804	0.997203	0.0364201	0.0965529	0.087062	-0.0405403	0.0399767	0.0746148	-0.000281833	0.0185605	0.0635193
	Gm16217	0.830713	0.0230248	0.371521	0.959938	1.90204	0.100561	0.172012	0.768669	1.27481	0.0706678	0.298502	0.891137	2.94734	0.163382	0.0725213	0.907713	0.0197755	-0.0280903	0.0622171	0.0504331	-0.00801138	0.015321	0.0212109	0.01436	0.0271028
	Stat5a	0.543359	0.0294692	0.471096	0.959939	0.447416	0.0485314	0.646593	0.962619	NA	NA	NA	NA	NA	NA	NA	NA	0.0642175	0.0524637	NA	-0.136408	0.0867899	0.168741	0.00117151	-0.0282528	0.134297
	Olfr78	0.643912	0.176709	0.480981	0.959958	NA	NA	NA	NA	NA	NA	NA	NA	NA	NA	NA	NA	0.185894	NA	NA	NA	0.185894	NA	0.185894	NA	0.185894
	Fkbp3	0.917449	0.0355994	0.348107	0.959967	0.10196	0.00766549	0.903471	0.994152	0.503824	0.0390994	0.61073	0.952978	0.321219	0.0249283	0.728466	0.984855	0.0261988	0.0407756	-0.00478501	0.055624	0.0148625	0.0159735	0.0352433	0.0476629	0.00503877
	Paip1	0.91391	0.0342774	0.34902	0.959967	0.346891	0.0255866	0.710517	0.974617	0.480346	0.0360321	0.624637	0.956091	0.546875	0.0410226	0.586097	0.97376	-0.0147259	-0.0151082	-0.0338194	-0.0189951	0.0105069	-0.0254564	-0.00424411	-0.0169817	-0.0116562
	Dnajc10	0.916144	0.0340431	0.348443	0.96	0.37796	0.028535	0.689436	0.972327	0.0185181	0.00137623	0.981667	0.99979	1.1011	0.081832	0.349403	0.935269	-0.0177153	-0.00112025	-0.0328768	-0.0214872	-0.00725191	-0.0202068	-0.0143695	-0.0150913	-0.0200644
	Ick	0.917136	0.0244432	0.348635	0.960016	0.275977	0.027504	0.761419	0.975484	5.8204	0.310247	0.00935663	0.329927	1.20561	0.064263	0.318541	0.927952	-0.03875	-0.194541	0.0993642	-0.0678133	-0.015824	-0.0272492	-0.0502507	-0.122065	0.0445653
	Nek8	0.539691	0.0245943	0.471531	0.960147	1.20202	0.109554	0.322441	0.848773	NA	NA	NA	NA	NA	NA	NA	NA	0.0720391	-0.155303	NA	0.0593523	0.40073	-0.10231	0.183635	-0.0320246	0.232748
	Bcl9l	0.518511	0.0292078	0.481261	0.96015	0.116996	0.0131808	0.890299	0.99166	NA	NA	NA	NA	NA	NA	NA	NA	-0.0513021	NA	0.00781513	-0.0657683	-0.0565297	-0.00137753	-0.0719145	-0.0582883	-0.0350814
	Cd274	0.531791	0.0145541	0.475783	0.960158	1.24546	0.033764	0.312781	0.847419	5.3249	0.291464	0.0160116	0.451124	2.93321	0.160552	0.0804698	0.913976	-0.0544535	0.00485181	-0.0940171	-0.0156739	-0.33255	0.0714275	-0.156146	0.0112018	-0.151342
	Fosb	0.554949	0.0359403	0.469557	0.96019	0.942945	0.122137	0.414568	0.881457	NA	NA	NA	NA	NA	NA	NA	NA	-0.0677295	-0.434939	0.0211652	NA	0.0360843	-0.186384	0.0659619	-0.202026	0.0216109
	Hsph1	0.542028	0.0156035	0.47108	0.960202	1.22545	0.0483397	0.316988	0.848466	6.6559	0.383211	0.00685614	0.297297	0.216395	0.0124589	0.807482	0.993639	-0.0671946	-0.489196	0.16528	-0.281111	0.376599	-0.208454	0.0477442	-0.385153	0.283813
	Per2	0.512007	0.0195907	0.481473	0.960222	0.989349	0.0749023	0.387095	0.880954	0.130477	0.00998471	0.878322	0.985861	0.191802	0.0146777	0.826777	0.993754	0.0327306	0.100703	0.0734134	-0.0397494	-0.00476724	0.0894316	-0.0222583	0.0293548	0.0343231
	Gm25187	0.54102	0.0164639	0.469445	0.960239	0.0151586	0.00121734	0.984965	0.998204	0.507439	0.030884	0.608619	0.952558	4.1374	0.251812	0.0291833	0.934965	0.0420579	-0.143363	0.162969	0.143454	-0.0426863	0.0335028	0.0503841	0.0189855	0.0601414
	Hist1h3d	0.853022	0.0327279	0.36619	0.960249	0.359673	0.0251293	0.702121	0.972606	0.145226	0.0111438	0.865688	0.984335	1.60061	0.122821	0.22543	0.940429	0.0320529	-0.0493391	0.08291	0.0922235	0.00587204	0.00987115	0.0515021	0.0232633	0.0426867
	Dnajc19	0.834119	0.0292286	0.370559	0.960254	0.902532	0.0676661	0.419427	0.882328	0.242471	0.016993	0.786667	0.975713	1.20684	0.0845785	0.317389	0.927934	0.0167775	0.0760329	-0.000343407	-0.0157623	0.0176768	0.0349648	0.000957257	0.0259398	0.00866668
	CT030259.1	0.545912	0.0316213	0.471397	0.960257	0.859088	0.0995231	0.443372	0.902417	NA	NA	NA	NA	NA	NA	NA	NA	0.0852704	NA	0.279423	NA	-0.223654	0.215268	-0.0440253	0.264881	-0.0175688
	Cyp51	1.37664	0.0370674	0.252682	0.960267	1.94058	0.121832	0.166424	0.767169	2.87738	0.154953	0.0766849	0.680282	1.56311	0.0841768	0.230935	0.932351	0.0189897	-0.00701064	0.00617739	-0.0149062	0.0779542	0.00357941	0.031524	-0.00759339	0.0420658
	Cdc42ep5	1.37009	0.0380318	0.253782	0.960277	3.47518	0.173592	0.0480005	0.546188	1.86063	0.103297	0.178244	0.82233	0.491513	0.0272875	0.61798	0.973927	-0.0309026	-0.0262001	-0.149462	0.0545275	0.000836078	-0.0958946	0.0276818	0.0177549	-0.074313
	Polr3c	1.39587	0.0541584	0.252792	0.960291	0.955031	0.0729923	0.403459	0.877491	0.106597	0.00827175	0.899451	0.987213	2.12733	0.165077	0.148137	0.932819	-0.142062	-0.314425	0.090185	-0.099487	-0.241713	-0.111305	-0.161113	-0.199139	-0.0994709
	Napa	1.35997	0.0493581	0.255494	0.960323	1.29644	0.0939718	0.292751	0.842325	0.00256901	0.000186477	0.997435	0.999436	0.297552	0.0215984	0.74545	0.988409	0.0181423	0.0393048	0.0139368	0.000208142	0.0195271	0.0253621	0.00986764	0.0196448	0.016732
	0610009B22Rik	0.856902	0.0307951	0.364219	0.960368	0.0887111	0.00594051	0.915422	0.990745	1.19021	0.085547	0.322205	0.902355	0.705592	0.0507147	0.504195	0.961435	0.020042	0.028599	0.0319677	-0.0417712	0.0644632	0.0292322	0.011346	-0.00893357	0.0482155
	Wdr73	0.861561	0.0323956	0.36437	0.960384	0.641653	0.0354134	0.536919	0.933372	0.625037	0.0470041	0.545375	0.937488	1.60002	0.120325	0.226679	0.938903	0.067714	-0.00491434	-0.00856493	0.223466	0.0214824	-0.00279243	0.143064	0.131115	0.00431251
	Papln	0.904266	0.0743424	0.364057	0.960392	NA	NA	NA	NA	0.629634	0.103528	0.552649	0.941458	NA	NA	NA	NA	0.169198	NA	NA	0.207126	0.35751	NA	0.297356	0.0699022	0.283549
	Slc25a36	1.46653	0.0361494	0.238191	0.960399	0.432228	0.0222329	0.654226	0.964357	7.10838	0.350438	0.003948	0.249351	0.510401	0.0251624	0.606895	0.975784	-0.00867762	0.0135236	-0.0204661	0.00920618	-0.0367391	-0.00295566	-0.0137664	0.0114183	-0.0286026
	Neu1	1.38066	0.0413824	0.252011	0.960413	2.02511	0.122973	0.154848	0.751239	1.06513	0.0638505	0.36108	0.906379	1.40109	0.08399	0.266576	0.929726	0.011943	-0.00895008	-0.00546825	0.00427789	0.0554697	-0.0066275	0.0298738	-0.00162236	0.0250007
	Prg4	0.53703	0.0218085	0.471069	0.960435	0.209452	0.0190566	0.812558	0.979515	0.319432	0.0259439	0.729733	0.969988	0.0150317	0.00122086	0.98509	1.00262	0.0571698	0.00641664	0.0303452	0.0974952	0.0750929	0.0232385	0.086294	0.0578076	0.0527191
	Rrm2	0.830592	0.0844905	0.385861	0.96046	NA	NA	NA	NA	NA	NA	NA	NA	NA	NA	NA	NA	-0.19312	NA	NA	NA	NA	-0.0681042	NA	-0.314051	NA
	Clip2	1.37827	0.0521432	0.252409	0.960461	0.350912	0.0274401	0.70775	0.973505	0.250085	0.0189226	0.780825	0.977907	0.426073	0.0322386	0.658119	0.974742	-0.0265337	-0.0200399	-0.0626744	-0.0170786	-0.00636407	-0.0431365	-0.0117213	-0.0189118	-0.0345192
	Cars	0.543106	0.0205752	0.4686	0.960474	0.369873	0.0269381	0.694857	0.972871	0.937667	0.0710456	0.406001	0.909553	0.119	0.00901645	0.888351	0.996018	-0.0344536	-0.14678	0.0224313	-0.0555532	0.0277427	-0.0540619	-0.0139053	-0.0994321	0.025087
	Diap1	0.544658	0.0209411	0.467972	0.960474	0.363068	0.0303467	0.699454	0.973525	0.80918	0.062223	0.457499	0.922631	0.0599421	0.00460933	0.941966	1.00253	-0.0172873	-0.0225452	-0.00207504	-0.0436306	-0.00650508	-0.0102314	-0.0250678	-0.0329717	-0.00429006
	Lrrk2	1.36081	0.0341572	0.255351	0.960479	4.02928	0.205144	0.031607	0.480122	0.0867971	0.00435732	0.917162	0.991643	3.62336	0.181897	0.0428618	0.91713	0.0492275	0.048873	0.266698	0.0624317	-0.171686	0.163912	-0.0546271	0.0517665	0.0475059
	Ahr	1.39598	0.0462263	0.253664	0.960495	4.06428	0.264951	0.0360904	0.513202	0.115842	0.00767195	0.891313	0.987689	1.72128	0.113997	0.208576	0.926102	-0.0919499	-0.176368	-0.198163	-0.184114	0.0233591	-0.197633	-0.0655578	-0.144107	-0.050342
	Phip	0.543998	0.0208928	0.468239	0.960499	0.653816	0.0506952	0.529455	0.93048	0.0166446	0.00127851	0.983505	0.998819	0.576314	0.0442679	0.569875	0.970425	-0.0212239	-0.0904752	-0.0208791	0.0353266	-0.0167915	-0.053167	0.00926758	-0.0240087	-0.0188353
	Csnk1g1	0.834429	0.0255359	0.370472	0.960509	2.27812	0.145636	0.125124	0.722961	1.71642	0.105055	0.201937	0.817633	0.426577	0.026109	0.657799	0.974484	0.0312111	0.141933	0.0640139	-0.0117757	-0.0552112	0.0983726	-0.0334934	0.0636533	0.00440135
	Ccdc47	0.54105	0.0207504	0.469433	0.960534	0.212685	0.0173796	0.809983	0.979889	0.134591	0.0103237	0.874757	0.984999	0.91926	0.0705113	0.412976	0.937446	0.0261146	0.0707108	-0.00781396	-0.0283298	0.0735231	0.0282963	0.0225967	0.0178058	0.0328546
	Fgf11	1.38602	0.0535638	0.25225	0.960558	0.0567313	0.00181093	0.944992	0.993229	0.377066	0.029144	0.690421	0.966427	1.31123	0.101347	0.290662	0.930658	0.0752899	-0.0198198	0.108894	0.130119	0.0342828	0.0650374	0.0822009	0.0848078	0.0715883
[truncated: 6,103 more rows]

## Sheet: IndividualPOEScores
	Gene	POE Score	Sample Barcode	Cross	Sex	Diet
[truncated: 182,188 more rows]

## Sheet: Annotations
	Ensembl ID	Gene Name Used
[truncated: 54,499 more rows]
