# Supplementary material for: Parent-of-origin effects propagate through networks to shape metabolic traits
Source: bioRxiv preprint, doi:10.1101/2021.08.10.455860, version 1 (2021-08-11)
Supplement: Supplemental Table 2 [file 455860_file04.xlsx]

## Sheet: Cross
	Gene	logFC	logCPM	LR	PValue	FDR
	ENSMUSG00000040035	1.99694	6.29619	28.3479	1.01357e-07	0.000507614
	ENSMUSG00000064246	-1.80929	4.66032	24.5459	7.25623e-07	0.00181703
	ENSMUSG00000021665	-1.08299	5.97876	22.5328	2.06581e-06	0.00324396
	ENSMUSG00000092517	-2.53962	5.44965	22.0979	2.59092e-06	0.00324396
	ENSMUSG00000027656	-2.1884	7.874	21.025	4.53323e-06	0.00454066
	ENSMUSG00000081534	-0.602463	6.33543	18.4261	1.76621e-05	0.0147426
	ENSMUSG00000052336	-1.18636	5.01503	16.8053	4.14182e-05	0.0296329
	ENSMUSG00000024810	1.43644	5.9116	15.3234	9.05859e-05	0.0567091
	ENSMUSG00000028884	-0.608855	6.05407	14.5477	0.000136655	0.0675926
	ENSMUSG00000049281	1.84447	4.1698	14.4033	0.000147546	0.0675926
	ENSMUSG00000027559	1.08779	15.8918	14.3916	0.00014846	0.0675926
	ENSMUSG00000033350	1.06588	6.42352	14.0948	0.000173823	0.0725451
	ENSMUSG00000047222	2.09055	5.18721	13.6966	0.000214845	0.0787325
	ENSMUSG00000020077	-0.643633	6.71196	13.6513	0.00022009	0.0787325
	ENSMUSG00000042761	1.01695	5.01563	13.1023	0.000294926	0.0971249
	ENSMUSG00000026463	0.683719	7.60899	12.9401	0.000321615	0.0971249
	ENSMUSG00000045414	0.656053	8.13492	12.8599	0.000335696	0.0971249
	ENSMUSG00000026321	-0.937959	5.32789	12.7868	0.000349077	0.0971249
	ENSMUSG00000020598	-1.17652	5.514	12.6695	0.000371663	0.0979666
	ENSMUSG00000062417	-1.30996	3.84973	12.5408	0.000398158	0.0986772
	ENSMUSG00000037664	0.812241	5.60784	12.3907	0.000431479	0.0986772
	ENSMUSG00000036106	0.638461	6.45452	12.3821	0.000433469	0.0986772
	ENSMUSG00000037280	-1.53001	4.49882	12.2553	0.000463935	0.099234
	ENSMUSG00000029716	-1.55738	5.58219	12.0508	0.0005177	0.099234
	ENSMUSG00000021670	-0.631082	6.03295	11.9714	0.000540223	0.099234
	ENSMUSG00000008575	0.797998	4.80885	11.818	0.000586594	0.099234
	ENSMUSG00000048376	-0.98782	5.59111	11.8161	0.000587193	0.099234
	ENSMUSG00000023915	-0.648156	7.07925	11.7948	0.000593977	0.099234
	ENSMUSG00000026437	-1.3582	4.29991	11.7945	0.000594051	0.099234
	ENSMUSG00000021831	-0.667064	5.21207	11.6964	0.000626196	0.099234
	ENSMUSG00000040612	0.989479	5.88765	11.6828	0.000630805	0.099234
	ENSMUSG00000048677	-0.773457	6.20987	11.6732	0.000634058	0.099234
	ENSMUSG00000068794	-1.16677	3.68268	11.4519	0.000714214	0.108392
	ENSMUSG00000068114	-0.552063	5.65805	11.3542	0.000752795	0.110097
	ENSMUSG00000031980	1.12446	7.16773	11.3136	0.00076942	0.110097
	ENSMUSG00000048490	0.715114	9.16343	11.1069	0.000860082	0.11845
	ENSMUSG00000024663	-0.67131	5.85344	11.0748	0.000875098	0.11845
	ENSMUSG00000015947	-1.26716	4.35711	10.6843	0.00108051	0.142044
	ENSMUSG00000037731	-0.578158	5.92426	10.6274	0.00111426	0.142044
	ENSMUSG00000041390	-0.56514	7.91027	10.5733	0.00114733	0.142044
	ENSMUSG00000034282	1.1787	4.00424	10.5144	0.0011845	0.142044
	ENSMUSG00000031489	1.33646	8.61765	10.4618	0.00121866	0.142044
	ENSMUSG00000037902	-0.659012	9.4034	10.4604	0.00121958	0.142044
	ENSMUSG00000049624	-0.569265	6.15374	10.2485	0.00136794	0.155703
	ENSMUSG00000038725	1.26534	7.76553	10.1472	0.0014452	0.158172
	ENSMUSG00000078234	1.02028	4.4945	10.1375	0.0014528	0.158172
	ENSMUSG00000002847	-0.855876	6.92838	10.0935	0.00148791	0.158548
	ENSMUSG00000022180	-0.630221	6.20134	9.95136	0.00160731	0.166289
	ENSMUSG00000054951	-0.800685	4.05105	9.92899	0.00162696	0.166289
	ENSMUSG00000026197	-0.486383	5.29467	9.81421	0.00173168	0.173452
	ENSMUSG00000020173	1.27108	3.93926	9.72031	0.00182243	0.178962
	ENSMUSG00000052760	-1.10617	3.84731	9.60075	0.00194498	0.180939
	ENSMUSG00000042985	1.16598	8.79107	9.59804	0.00194785	0.180939
	ENSMUSG00000001630	-0.351844	7.46663	9.59512	0.00195095	0.180939
	ENSMUSG00000026335	-0.459883	11.0206	9.55514	0.0019939	0.181561
	ENSMUSG00000018774	-1.12281	8.97383	9.49522	0.00206008	0.184237
	ENSMUSG00000032332	-0.756228	5.38307	9.39219	0.00217911	0.185024
	ENSMUSG00000049878	-0.432884	6.47058	9.38424	0.00218859	0.185024
	ENSMUSG00000078249	-0.950052	6.69012	9.36979	0.0022059	0.185024
	ENSMUSG00000035891	-0.740855	8.14612	9.34702	0.00223349	0.185024
	ENSMUSG00000020415	-0.870746	4.38316	9.33059	0.00225359	0.185024
	ENSMUSG00000045328	-1.08965	3.56931	9.27607	0.00232166	0.187538
	ENSMUSG00000062593	-1.11228	7.69098	9.18259	0.00244329	0.19017
	ENSMUSG00000031659	-0.760529	7.23576	9.18009	0.00244663	0.19017
	ENSMUSG00000027715	-0.83459	4.92194	9.13681	0.00250517	0.19017
	ENSMUSG00000030733	0.745409	4.48327	9.09995	0.00255616	0.19017
	ENSMUSG00000022878	0.702928	10.0465	9.09419	0.00256423	0.19017
	ENSMUSG00000032122	-1.18902	7.87196	9.04173	0.00263885	0.19017
	ENSMUSG00000006273	-0.633384	8.19481	9.01976	0.00267077	0.19017
	ENSMUSG00000015355	-1.0625	5.47831	9.01634	0.00267577	0.19017
	ENSMUSG00000089672	-1.06704	8.61246	8.95646	0.00276489	0.19017
	ENSMUSG00000011114	0.451636	5.43346	8.94214	0.00278666	0.19017
	ENSMUSG00000039568	0.689579	4.64829	8.92752	0.00280906	0.19017
	ENSMUSG00000020661	-0.59304	5.50898	8.92697	0.00280991	0.19017
	ENSMUSG00000023994	-0.599302	5.86642	8.8406	0.00294602	0.196196
	ENSMUSG00000029919	-1.25307	5.58499	8.82133	0.00297729	0.196196
	ENSMUSG00000028701	1.23298	3.76003	8.76524	0.00307026	0.199695
	ENSMUSG00000030513	0.877429	6.77534	8.71829	0.00315033	0.201175
	ENSMUSG00000052085	-0.767577	8.37184	8.65793	0.00325641	0.201175
	ENSMUSG00000057751	0.954905	4.07593	8.6062	0.0033502	0.201175
	ENSMUSG00000052957	0.873324	9.18567	8.6009	0.00335997	0.201175
	ENSMUSG00000085519	1.40655	4.07753	8.59781	0.00336567	0.201175
	ENSMUSG00000024371	0.636168	6.43042	8.55301	0.00344951	0.201175
	ENSMUSG00000049037	-0.603599	6.08696	8.53516	0.00348351	0.201175
	ENSMUSG00000055782	0.682569	10.9916	8.49562	0.00356002	0.201175
	ENSMUSG00000029254	-1.20057	4.52212	8.48541	0.00358006	0.201175
	ENSMUSG00000021508	-1.17504	4.92843	8.48145	0.00358786	0.201175
	ENSMUSG00000027001	0.53522	5.61678	8.47736	0.00359594	0.201175
	ENSMUSG00000028459	-1.1559	4.90855	8.47111	0.00360832	0.201175
	ENSMUSG00000030707	-0.777105	5.89517	8.44451	0.00366147	0.201175
	ENSMUSG00000008475	-0.512031	9.24146	8.44067	0.00366921	0.201175
	ENSMUSG00000053317	-0.431317	7.53281	8.42766	0.00369556	0.201175
	ENSMUSG00000072244	0.576658	4.79676	8.40151	0.0037491	0.201895
	ENSMUSG00000038776	0.58315	6.84448	8.36728	0.00382037	0.203544
	ENSMUSG00000009907	-0.336611	6.51363	8.29281	0.00398023	0.208096
	ENSMUSG00000009376	0.539374	6.7128	8.28886	0.00398889	0.208096
	ENSMUSG00000028565	0.550581	7.45783	8.23457	0.00410999	0.208674
	ENSMUSG00000046711	-0.970242	5.52795	8.23143	0.0041171	0.208674
	ENSMUSG00000020142	-0.546817	5.64404	8.22796	0.00412498	0.208674
	ENSMUSG00000005873	-0.521171	5.65049	8.18186	0.00423114	0.209645
	ENSMUSG00000025105	1.15119	4.51445	8.15251	0.00430016	0.209645
	ENSMUSG00000027882	-0.612763	4.97039	8.15173	0.00430201	0.209645
	ENSMUSG00000020658	-0.797372	5.10927	8.14769	0.00431161	0.209645
	ENSMUSG00000028496	0.597218	6.32228	8.12055	0.00437662	0.210001
	ENSMUSG00000006304	-0.451738	6.80673	8.09831	0.00443066	0.210001
	ENSMUSG00000043051	-0.707584	3.9645	8.09256	0.00444473	0.210001
	ENSMUSG00000030147	-0.864251	5.17537	8.0259	0.00461132	0.215333
	ENSMUSG00000042826	0.782071	4.31983	8.01327	0.00464358	0.215333
	ENSMUSG00000048387	1.0316	6.37354	7.96085	0.00478	0.219626
	ENSMUSG00000026627	-0.896155	4.03416	7.90776	0.00492232	0.222678
	ENSMUSG00000046561	-0.730487	4.37971	7.90298	0.00493535	0.222678
	ENSMUSG00000021466	0.63556	4.95523	7.88381	0.00498792	0.22304
	ENSMUSG00000040613	-0.988833	7.80994	7.83431	0.00512637	0.227203
	ENSMUSG00000040322	-0.394427	7.95798	7.81003	0.0051957	0.228255
	ENSMUSG00000024542	-0.325425	7.26843	7.7607	0.00533952	0.230644
	ENSMUSG00000079227	-0.77361	8.06883	7.74501	0.00538613	0.230644
	ENSMUSG00000029005	-0.773299	4.23644	7.73216	0.00542457	0.230644
	ENSMUSG00000068335	-0.610939	5.99909	7.72893	0.00543429	0.230644
	ENSMUSG00000024921	0.405912	7.2894	7.69072	0.00555055	0.232846
	ENSMUSG00000032841	0.625999	6.70628	7.68145	0.00557914	0.232846
	ENSMUSG00000032020	-0.748167	5.24627	7.65868	0.00564999	0.233854
	ENSMUSG00000054520	-0.68216	6.81393	7.63826	0.00571429	0.234562
	ENSMUSG00000027346	-0.39102	6.20084	7.62365	0.00576078	0.234562
	ENSMUSG00000030172	0.417453	7.44402	7.58297	0.00589223	0.235632
	ENSMUSG00000006731	-1.08604	3.95722	7.56943	0.00593666	0.235632
	ENSMUSG00000028312	-0.55792	5.95761	7.55106	0.00599749	0.235632
	ENSMUSG00000037466	-0.792309	3.70927	7.54685	0.00601151	0.235632
	ENSMUSG00000021190	-0.709984	7.17131	7.50913	0.0061387	0.235632
	ENSMUSG00000033970	-0.447084	5.19892	7.50663	0.00614724	0.235632
	ENSMUSG00000042476	-0.804015	4.78443	7.50284	0.00616016	0.235632
	ENSMUSG00000030786	-0.810987	4.54206	7.48964	0.00620549	0.235632
	ENSMUSG00000032826	0.528716	7.97628	7.48818	0.00621051	0.235632
	ENSMUSG00000041199	0.861699	4.0299	7.46338	0.00629668	0.237105
	ENSMUSG00000051910	0.675364	5.30995	7.40305	0.00651135	0.239354
	ENSMUSG00000064168	-0.92514	4.69879	7.3902	0.00655803	0.239354
	ENSMUSG00000057181	0.587136	4.52181	7.38231	0.00658684	0.239354
	ENSMUSG00000025743	-0.462972	8.09995	7.37876	0.00659986	0.239354
	ENSMUSG00000030263	-0.653591	6.70455	7.37514	0.00661318	0.239354
	ENSMUSG00000024079	0.566688	4.11009	7.36701	0.00664315	0.239354
	ENSMUSG00000048865	-0.738454	7.53174	7.31102	0.00685328	0.245162
	ENSMUSG00000004880	-0.553741	4.70217	7.27291	0.00700022	0.248642
	ENSMUSG00000020437	-0.631794	5.83511	7.23223	0.0071606	0.252315
	ENSMUSG00000026604	0.429595	8.36693	7.22062	0.00720707	0.252315
	ENSMUSG00000092984	1.15914	10.3842	7.20878	0.00725478	0.252315
	ENSMUSG00000045038	0.627304	6.16764	7.16955	0.00741514	0.256114
	ENSMUSG00000028909	0.690119	5.20829	7.14525	0.00751627	0.257829
	ENSMUSG00000038943	-0.879548	5.56725	7.11534	0.0076427	0.258978
	ENSMUSG00000024481	1.03248	5.12865	7.10042	0.00770657	0.258978
	ENSMUSG00000020594	0.509834	5.05166	7.09298	0.00773865	0.258978
	ENSMUSG00000081723	-0.879454	5.59546	7.08882	0.00775662	0.258978
	ENSMUSG00000028581	-0.902544	4.4457	7.06828	0.00784606	0.260229
	ENSMUSG00000032076	-0.994654	6.30757	7.02927	0.00801881	0.260335
	ENSMUSG00000039168	-0.318056	7.84332	7.00414	0.00813216	0.260335
	ENSMUSG00000015305	-0.842367	4.2813	7.00352	0.00813498	0.260335
	ENSMUSG00000060093	-0.688808	5.59251	7.00332	0.00813585	0.260335
	ENSMUSG00000020876	-0.352526	6.21201	6.99627	0.00816796	0.260335
	ENSMUSG00000038024	-0.450051	7.19109	6.99602	0.00816912	0.260335
	ENSMUSG00000063146	-0.424448	6.85359	6.9864	0.00821313	0.260335
	ENSMUSG00000026185	0.546892	9.30489	6.97444	0.00826823	0.260434
	ENSMUSG00000032702	0.443897	7.18661	6.94145	0.0084221	0.26326
	ENSMUSG00000020649	-0.854374	4.22197	6.93276	0.0084631	0.26326
	ENSMUSG00000016458	0.936898	5.18784	6.9118	0.0085629	0.26421
	ENSMUSG00000031951	1.03119	3.86402	6.89669	0.00863553	0.26421
	ENSMUSG00000000318	-0.752558	8.88551	6.88576	0.00868853	0.26421
	ENSMUSG00000005360	1.12969	4.24327	6.88244	0.00870466	0.26421
	ENSMUSG00000018293	-0.342924	8.27786	6.86623	0.00878397	0.265011
	ENSMUSG00000022309	-0.826543	4.84997	6.83279	0.00894995	0.266953
	ENSMUSG00000021068	-0.39201	7.98234	6.83179	0.00895495	0.266953
	ENSMUSG00000020900	0.439057	7.61054	6.81644	0.00903227	0.267665
	ENSMUSG00000025473	-1.43497	6.14547	6.80002	0.00911567	0.268548
	ENSMUSG00000025154	-0.74051	6.11394	6.75756	0.00933512	0.270849
	ENSMUSG00000041058	-0.478274	6.3984	6.74043	0.00942521	0.270849
	ENSMUSG00000029291	-0.655112	4.53995	6.73742	0.00944113	0.270849
	ENSMUSG00000024300	-0.896998	7.47147	6.7348	0.00945498	0.270849
	ENSMUSG00000062646	0.472381	5.75694	6.73306	0.0094642	0.270849
	ENSMUSG00000021765	-0.831865	4.96627	6.61425	0.0101166	0.287875
	ENSMUSG00000026288	-0.62679	4.66045	6.60374	0.0101765	0.287943
	ENSMUSG00000040552	-0.843394	6.66277	6.55779	0.0104426	0.292499
	ENSMUSG00000055435	0.883653	4.95567	6.5558	0.0104543	0.292499
	ENSMUSG00000050335	-1.00928	9.3171	6.49377	0.0108253	0.300199
	ENSMUSG00000056069	-0.619977	6.67221	6.4858	0.010874	0.300199
	ENSMUSG00000026069	-0.588619	4.27446	6.47175	0.0109602	0.300199
	ENSMUSG00000026357	-0.980254	4.66539	6.47029	0.0109693	0.300199
	ENSMUSG00000021226	0.588785	6.24909	6.44296	0.0111393	0.303194
	ENSMUSG00000078945	-0.716058	5.54882	6.42821	0.0112321	0.304069
	ENSMUSG00000038178	-0.406256	6.68247	6.38614	0.0115015	0.309504
	ENSMUSG00000032220	-0.768989	6.99419	6.3696	0.0116092	0.309504
	ENSMUSG00000071984	0.66229	7.07862	6.36821	0.0116183	0.309504
	ENSMUSG00000032040	-0.501913	4.67824	6.32722	0.0118899	0.312952
	ENSMUSG00000050555	-0.677015	4.13775	6.32615	0.011897	0.312952
	ENSMUSG00000033849	0.630154	9.12117	6.32047	0.0119352	0.312952
	ENSMUSG00000030220	-0.533563	6.54883	6.30585	0.012034	0.3139
	ENSMUSG00000024529	-0.774035	4.76307	6.28502	0.0121763	0.315965
	ENSMUSG00000026622	-0.839169	4.32594	6.27422	0.0122507	0.316258
	ENSMUSG00000055116	-1.48774	5.19537	6.24856	0.0124295	0.319105
	ENSMUSG00000035181	-0.363898	6.74509	6.24017	0.0124884	0.319105
	ENSMUSG00000006369	0.935448	4.76109	6.22377	0.0126046	0.319513
	ENSMUSG00000022969	-0.818188	4.39185	6.21993	0.012632	0.319513
	ENSMUSG00000044349	0.87406	7.56761	6.20137	0.0127651	0.321257
	ENSMUSG00000005124	1.05935	3.67406	6.18146	0.0129096	0.322587
	ENSMUSG00000032827	0.517724	5.57906	6.16545	0.0130269	0.322587
	ENSMUSG00000017897	-0.626418	4.43287	6.1647	0.0130324	0.322587
	ENSMUSG00000024781	-0.782496	10.8479	6.15886	0.0130756	0.322587
	ENSMUSG00000055632	0.740649	7.58493	6.14776	0.0131579	0.323025
	ENSMUSG00000031517	1.04561	4.94405	6.13534	0.0132506	0.323715
	ENSMUSG00000021763	0.772227	5.41633	6.10873	0.0134516	0.32703
	ENSMUSG00000059309	-0.491381	5.91374	6.09186	0.0135806	0.328571
	ENSMUSG00000005370	-0.527561	4.35867	6.06437	0.0137936	0.331489
	ENSMUSG00000037278	-0.585697	4.43675	6.05926	0.0138335	0.331489
	ENSMUSG00000044646	0.612606	5.69713	5.98564	0.0144228	0.343964
	ENSMUSG00000055128	0.48129	5.31096	5.97452	0.014514	0.344498
	ENSMUSG00000028841	0.845736	4.18417	5.96196	0.0146178	0.344783
	ENSMUSG00000078780	-1.30281	4.87536	5.94026	0.0147989	0.344783
	ENSMUSG00000042406	-0.337035	7.34598	5.93843	0.0148142	0.344783
	ENSMUSG00000069274	-0.699519	6.77445	5.93293	0.0148605	0.344783
	ENSMUSG00000031523	0.466525	6.96952	5.93178	0.0148703	0.344783
	ENSMUSG00000031075	0.873422	7.68814	5.90326	0.0151129	0.347898
	ENSMUSG00000063286	-0.464233	4.852	5.89231	0.0152072	0.347898
	ENSMUSG00000023992	-1.03408	8.05542	5.89163	0.015213	0.347898
	ENSMUSG00000078942	-0.746543	3.65174	5.86606	0.0154356	0.348232
	ENSMUSG00000036944	-0.560889	4.99939	5.85038	0.0155737	0.348232
	ENSMUSG00000030671	0.454408	10.4169	5.84798	0.015595	0.348232
	ENSMUSG00000027709	0.435724	5.44387	5.8464	0.0156089	0.348232
	ENSMUSG00000024302	0.872245	5.43307	5.84434	0.0156272	0.348232
	ENSMUSG00000030323	0.619132	4.931	5.83577	0.0157035	0.348232
	ENSMUSG00000048218	0.628867	5.28004	5.82424	0.0158068	0.348232
	ENSMUSG00000038648	0.46073	5.51554	5.81725	0.0158698	0.348232
	ENSMUSG00000074918	0.612546	6.04986	5.81207	0.0159165	0.348232
	ENSMUSG00000021639	-0.542721	4.26873	5.81137	0.0159229	0.348232
	ENSMUSG00000063727	1.21032	4.38082	5.78872	0.0161294	0.351213
	ENSMUSG00000024672	-1.06619	4.6404	5.7504	0.0164849	0.356269
	ENSMUSG00000006715	-0.727561	4.19883	5.73901	0.0165921	0.356269
	ENSMUSG00000028243	0.426734	6.22803	5.72321	0.0167421	0.356269
	ENSMUSG00000074802	-0.884579	6.40192	5.72235	0.0167503	0.356269
	ENSMUSG00000027293	-0.407764	6.89358	5.71753	0.0167963	0.356269
	ENSMUSG00000006519	-0.741792	8.46081	5.7159	0.016812	0.356269
	ENSMUSG00000004207	-0.471456	13.1755	5.70618	0.0169053	0.356269
	ENSMUSG00000030148	-0.820808	7.23898	5.68616	0.0170992	0.356269
	ENSMUSG00000024098	0.561047	6.40087	5.67416	0.0172166	0.356269
	ENSMUSG00000029366	-0.479333	5.21344	5.67352	0.0172229	0.356269
	ENSMUSG00000003644	-0.575134	4.42655	5.67133	0.0172444	0.356269
	ENSMUSG00000040950	0.459467	7.51891	5.66776	0.0172795	0.356269
	ENSMUSG00000036098	0.77447	4.87914	5.65057	0.0174497	0.356269
	ENSMUSG00000025314	-0.447784	7.85722	5.64195	0.0175357	0.356269
	ENSMUSG00000031710	3.31827	7.14075	5.63787	0.0175766	0.356269
	ENSMUSG00000035783	0.8505	3.70343	5.63145	0.017641	0.356269
	ENSMUSG00000062524	-0.634767	3.73022	5.63113	0.0176443	0.356269
	ENSMUSG00000024053	0.680848	6.40877	5.62769	0.0176789	0.356269
	ENSMUSG00000030225	-0.551383	6.45558	5.6243	0.0177132	0.356269
	ENSMUSG00000038235	0.342822	7.49711	5.59936	0.0179671	0.359931
	ENSMUSG00000049690	0.700861	3.78029	5.59234	0.0180392	0.359935
	ENSMUSG00000017167	0.660297	3.94868	5.5688	0.0182832	0.362975
	ENSMUSG00000018750	0.388261	8.29985	5.56371	0.0183365	0.362975
	ENSMUSG00000049881	-0.339783	6.16521	5.52267	0.0187716	0.370126
	ENSMUSG00000032643	-0.53166	5.02758	5.51569	0.0188466	0.370148
	ENSMUSG00000069270	-0.70013	5.76444	5.49832	0.0190347	0.370996
	ENSMUSG00000025348	-0.433476	10.2808	5.49167	0.0191073	0.370996
	ENSMUSG00000048334	0.366726	6.72073	5.48915	0.0191348	0.370996
	ENSMUSG00000029765	0.574238	6.77425	5.46037	0.0194525	0.370996
	ENSMUSG00000069265	-0.604623	5.79755	5.45664	0.0194941	0.370996
	ENSMUSG00000053754	0.358053	6.01759	5.45525	0.0195096	0.370996
	ENSMUSG00000035376	-0.637117	5.30812	5.45089	0.0195584	0.370996
	ENSMUSG00000097462	0.776515	6.07364	5.43339	0.0197553	0.370996
	ENSMUSG00000058297	0.911617	6.98281	5.43061	0.0197868	0.370996
	ENSMUSG00000011884	-0.556301	4.86921	5.43013	0.0197922	0.370996
	ENSMUSG00000095217	-0.801217	5.44529	5.42698	0.0198279	0.370996
	ENSMUSG00000032089	-0.590113	8.00982	5.42559	0.0198437	0.370996
	ENSMUSG00000026177	-0.716597	7.5148	5.42479	0.0198528	0.370996
	ENSMUSG00000028649	-0.30969	7.32551	5.41148	0.0200047	0.372444
	ENSMUSG00000027331	-0.669972	3.90593	5.40297	0.0201025	0.372879
	ENSMUSG00000097815	0.596299	6.41861	5.38002	0.0203686	0.373557
	ENSMUSG00000032352	0.881073	3.71358	5.37248	0.0204569	0.373557
	ENSMUSG00000032311	0.727592	7.70327	5.36413	0.020555	0.373557
	ENSMUSG00000056771	0.525154	4.73633	5.35864	0.0206198	0.373557
	ENSMUSG00000078517	0.40204	5.24671	5.35818	0.0206252	0.373557
	ENSMUSG00000055980	0.498281	5.2444	5.35672	0.0206426	0.373557
	ENSMUSG00000050855	0.692183	4.28818	5.35515	0.0206612	0.373557
	ENSMUSG00000030787	0.58449	7.44944	5.34757	0.0207512	0.373827
	ENSMUSG00000040010	-0.57519	5.18414	5.33853	0.020859	0.373827
	ENSMUSG00000058392	-0.477655	4.30552	5.33511	0.0209	0.373827
	ENSMUSG00000022952	-0.696669	5.37304	5.3279	0.0209867	0.374041
	ENSMUSG00000032812	-0.41278	5.86029	5.31828	0.0211028	0.374777
	ENSMUSG00000037894	-0.72758	3.87034	5.29604	0.021374	0.377914
	ENSMUSG00000029062	0.590447	4.5749	5.29145	0.0214304	0.377914
	ENSMUSG00000024393	0.358344	8.15557	5.27979	0.0215744	0.379119
	ENSMUSG00000024369	0.441385	4.9857	5.2605	0.0218148	0.382003
	ENSMUSG00000034216	-0.355887	6.70071	5.23508	0.0221358	0.386274
	ENSMUSG00000044405	0.510408	8.7399	5.22393	0.0222782	0.387409
	ENSMUSG00000074677	-1.09141	4.84946	5.20371	0.0225387	0.390583
	ENSMUSG00000028862	0.439151	7.99152	5.1893	0.0227264	0.392476
	ENSMUSG00000025911	0.767627	5.43666	5.17615	0.0228991	0.3941
	ENSMUSG00000038147	-1.13728	5.52423	5.16081	0.0231021	0.395888
	ENSMUSG00000021549	-0.403888	8.36179	5.15638	0.0231611	0.395888
	ENSMUSG00000019899	-0.384983	8.79157	5.13687	0.0234228	0.397021
	ENSMUSG00000040751	-1.08806	3.93434	5.13001	0.0235156	0.397021
	ENSMUSG00000044145	-0.586196	4.26293	5.12736	0.0235515	0.397021
	ENSMUSG00000027513	0.705361	8.05686	5.11872	0.0236691	0.397021
	ENSMUSG00000031592	0.466558	5.10146	5.11468	0.0237242	0.397021
	ENSMUSG00000070709	0.458018	4.63481	5.11288	0.0237489	0.397021
	ENSMUSG00000068329	-0.478717	5.10834	5.10497	0.0238574	0.397021
	ENSMUSG00000025324	0.438876	6.95023	5.10467	0.0238615	0.397021
	ENSMUSG00000061132	-0.873178	4.57743	5.0839	0.0241489	0.399429
	ENSMUSG00000029468	-0.491691	7.16316	5.0827	0.0241658	0.399429
	ENSMUSG00000042447	0.468267	4.06872	5.07188	0.024317	0.400606
	ENSMUSG00000042594	-0.531865	4.67682	5.06331	0.0244375	0.401104
	ENSMUSG00000073468	-0.526318	5.20158	5.05836	0.0245074	0.401104
	ENSMUSG00000029234	-0.334319	7.46132	5.03902	0.0247825	0.404286
	ENSMUSG00000020186	0.644835	7.30509	5.00778	0.0252337	0.406118
	ENSMUSG00000040345	-0.744299	5.42601	5.00763	0.0252358	0.406118
	ENSMUSG00000027506	-0.709411	6.46067	5.00087	0.0253346	0.406118
	ENSMUSG00000002297	-0.614609	5.06331	5.00041	0.0253413	0.406118
	ENSMUSG00000051735	-0.601744	5.78906	4.99257	0.0254563	0.406118
	ENSMUSG00000041559	0.992302	4.72571	4.98732	0.0255337	0.406118
	ENSMUSG00000006057	-0.380865	6.6203	4.98646	0.0255465	0.406118
	ENSMUSG00000040479	-0.539097	5.59142	4.9857	0.0255576	0.406118
	ENSMUSG00000003178	0.574052	5.26416	4.98117	0.0256246	0.406118
	ENSMUSG00000024677	-0.918417	3.96159	4.97158	0.0257671	0.407087
	ENSMUSG00000072825	0.61556	5.6912	4.96464	0.0258707	0.407276
	ENSMUSG00000015474	0.389889	5.26165	4.9599	0.0259417	0.407276
	ENSMUSG00000024413	-0.300057	8.33927	4.95387	0.0260324	0.407423
	ENSMUSG00000037370	-0.756154	4.74847	4.9378	0.0262754	0.409569
	ENSMUSG00000001123	-0.392748	5.43598	4.93401	0.0263331	0.409569
	ENSMUSG00000005505	-0.728031	3.7406	4.9077	0.0267373	0.414568
	ENSMUSG00000042787	-0.44663	5.12602	4.87818	0.0271984	0.419698
	ENSMUSG00000030162	-1.0484	5.35406	4.87581	0.0272357	0.419698
	ENSMUSG00000036067	-0.827258	4.66234	4.8452	0.0277231	0.425899
	ENSMUSG00000028393	0.605331	5.84539	4.8217	0.0281037	0.429882
	ENSMUSG00000038119	0.385682	7.8167	4.81861	0.0281541	0.429882
	ENSMUSG00000025103	-0.390565	5.69499	4.81054	0.0282862	0.430587
	ENSMUSG00000015027	-0.402147	6.74082	4.7814	0.0287687	0.436603
	ENSMUSG00000058818	-0.479929	6.17888	4.77422	0.0288889	0.437104
	ENSMUSG00000023886	0.596206	5.21118	4.76036	0.0291224	0.437908
	ENSMUSG00000032344	-0.805538	3.59309	4.75648	0.0291881	0.437908
	ENSMUSG00000034312	0.425335	7.89461	4.75553	0.0292044	0.437908
	ENSMUSG00000080917	-0.784387	4.62448	4.74921	0.0293118	0.438207
	ENSMUSG00000028975	0.44835	5.69903	4.74028	0.0294643	0.439177
	ENSMUSG00000019194	-0.38337	6.55559	4.73062	0.0296302	0.440339
	ENSMUSG00000032038	0.522696	4.38548	4.72495	0.0297281	0.440486
	ENSMUSG00000033773	0.290216	6.05393	4.70927	0.0300005	0.44321
	ENSMUSG00000056529	-0.566841	9.54125	4.6962	0.0302294	0.44323
	ENSMUSG00000035878	0.486991	5.43214	4.69382	0.0302713	0.44323
	ENSMUSG00000034936	0.870591	5.34939	4.69113	0.0303186	0.44323
	ENSMUSG00000032396	0.326144	6.30962	4.68903	0.0303558	0.44323
	ENSMUSG00000003534	0.449116	7.33571	4.64553	0.0311345	0.453279
	ENSMUSG00000056888	-1.02922	5.26301	4.63984	0.0312379	0.453466
	ENSMUSG00000004530	-0.377405	6.74937	4.63221	0.0313771	0.453901
	ENSMUSG00000006589	-0.651209	6.07638	4.62827	0.0314492	0.453901
	ENSMUSG00000071757	0.405196	6.11081	4.61659	0.0316641	0.455574
	ENSMUSG00000059049	-0.907236	4.65206	4.61211	0.031747	0.455574
	ENSMUSG00000041415	0.350301	5.40829	4.59708	0.0320265	0.458272
	ENSMUSG00000032531	0.398061	8.95895	4.58301	0.0322905	0.460733
	ENSMUSG00000016756	-0.416331	6.75213	4.57781	0.0323885	0.460819
	ENSMUSG00000018405	-0.329374	5.80566	4.55886	0.0327489	0.463159
	ENSMUSG00000053398	0.605213	4.35672	4.55009	0.0329171	0.463159
	ENSMUSG00000046516	-0.555942	4.7528	4.5453	0.0330092	0.463159
	ENSMUSG00000024621	-0.396799	8.31945	4.54179	0.0330769	0.463159
	ENSMUSG00000054612	0.547724	5.16055	4.53375	0.0332328	0.463159
	ENSMUSG00000020922	0.394441	7.10203	4.53127	0.0332809	0.463159
	ENSMUSG00000032263	0.332345	7.55634	4.52947	0.0333159	0.463159
	ENSMUSG00000049657	0.381588	6.31596	4.52858	0.0333333	0.463159
	ENSMUSG00000028264	-0.851463	3.95692	4.52591	0.0333853	0.463159
	ENSMUSG00000073374	0.459318	4.40097	4.51733	0.0335532	0.464202
	ENSMUSG00000029050	0.323055	6.98553	4.50938	0.0337096	0.46508
	ENSMUSG00000029823	0.357293	6.22286	4.49406	0.0340127	0.467051
	ENSMUSG00000001999	-0.446873	6.75481	4.4905	0.0340838	0.467051
	ENSMUSG00000027852	-0.541191	4.26715	4.48807	0.0341321	0.467051
	ENSMUSG00000027386	-0.861606	6.069	4.47878	0.0343183	0.468319
	ENSMUSG00000031604	-0.379791	7.19409	4.46301	0.0346364	0.471376
	ENSMUSG00000023031	-0.412582	6.47715	4.45832	0.0347315	0.471389
	ENSMUSG00000028270	0.355195	8.8198	4.44393	0.0350255	0.473596
	ENSMUSG00000020189	-0.376732	9.3667	4.4385	0.0351371	0.473596
	ENSMUSG00000038241	0.307397	7.28601	4.43421	0.0352255	0.473596
	ENSMUSG00000069300	-0.799548	5.20775	4.43194	0.0352724	0.473596
	ENSMUSG00000042700	-0.3416	5.4001	4.41068	0.0357146	0.475354
	ENSMUSG00000034673	0.291361	7.30756	4.40915	0.0357466	0.475354
	ENSMUSG00000060678	-0.399298	7.68416	4.40753	0.0357807	0.475354
	ENSMUSG00000028475	-0.367519	5.60142	4.40421	0.0358504	0.475354
	ENSMUSG00000024187	-0.276558	8.56886	4.4029	0.0358779	0.475354
	ENSMUSG00000026621	-0.574794	8.33854	4.39502	0.0360441	0.476196
	ENSMUSG00000019977	0.342701	5.58932	4.38862	0.0361797	0.476196
	ENSMUSG00000026341	-0.358494	8.02593	4.38572	0.0362411	0.476196
	ENSMUSG00000066637	-0.342899	5.24799	4.38193	0.0363218	0.476196
	ENSMUSG00000019718	0.444472	6.16855	4.3612	0.0367663	0.480766
	ENSMUSG00000029718	-0.390487	7.87729	4.35227	0.0369596	0.481101
	ENSMUSG00000023010	-0.375816	5.99996	4.3468	0.0370786	0.481101
	ENSMUSG00000028962	-0.332358	6.04774	4.34672	0.0370802	0.481101
	ENSMUSG00000026482	0.266976	8.93881	4.33616	0.0373111	0.481628
	ENSMUSG00000028992	0.583994	3.69958	4.33606	0.0373131	0.481628
	ENSMUSG00000026203	0.467449	5.56831	4.33054	0.0374344	0.481866
	ENSMUSG00000049539	-0.713487	5.94804	4.32647	0.037524	0.481866
	ENSMUSG00000094947	0.581686	4.48006	4.31456	0.0377877	0.483025
	ENSMUSG00000030204	-0.258006	6.6902	4.31368	0.0378072	0.483025
	ENSMUSG00000052681	-0.333208	7.68988	4.30284	0.0380488	0.483362
	ENSMUSG00000042129	-0.559262	6.1251	4.3018	0.0380719	0.483362
	ENSMUSG00000032293	0.46339	5.1062	4.28701	0.0384048	0.483362
	ENSMUSG00000087150	-0.569818	4.5832	4.28575	0.0384332	0.483362
	ENSMUSG00000052812	0.628755	3.7079	4.28381	0.038477	0.483362
	ENSMUSG00000020818	-0.334132	5.75088	4.28109	0.0385386	0.483362
	ENSMUSG00000073982	-0.355092	6.5305	4.2796	0.0385724	0.483362
	ENSMUSG00000040701	0.422107	4.32589	4.27814	0.0386057	0.483362
	ENSMUSG00000053581	-0.288933	8.61389	4.2612	0.0389924	0.486987
	ENSMUSG00000021646	0.434376	6.6908	4.25262	0.0391899	0.488236
	ENSMUSG00000024038	0.402831	4.93393	4.24354	0.0393998	0.488301
	ENSMUSG00000037239	0.677464	3.5937	4.23568	0.0395827	0.488301
	ENSMUSG00000035212	-0.303862	8.29296	4.23353	0.0396329	0.488301
	ENSMUSG00000039449	-0.248599	6.21105	4.23097	0.0396928	0.488301
	ENSMUSG00000020652	-0.372175	5.52524	4.22975	0.0397213	0.488301
	ENSMUSG00000024800	-0.519608	4.14281	4.22462	0.0398414	0.488301
	ENSMUSG00000021427	-0.256309	7.09601	4.22308	0.0398777	0.488301
	ENSMUSG00000022178	0.448458	5.22253	4.21299	0.0401157	0.489216
	ENSMUSG00000021701	-0.352944	7.58402	4.20593	0.0402829	0.489216
	ENSMUSG00000026480	-0.655603	7.49247	4.20568	0.0402889	0.489216
	ENSMUSG00000040710	-0.591444	6.20115	4.2034	0.0403431	0.489216
	ENSMUSG00000033739	-0.510775	4.18098	4.19695	0.0404969	0.489895
	ENSMUSG00000041482	0.6436	5.26152	4.18868	0.0406947	0.490602
	ENSMUSG00000009013	-0.573838	3.85744	4.18633	0.0407512	0.490602
	ENSMUSG00000031503	-0.478887	12.1885	4.18191	0.0408576	0.490703
	ENSMUSG00000040112	0.256602	6.66017	4.1716	0.041107	0.491311
	ENSMUSG00000024817	-0.337325	6.85362	4.16893	0.0411717	0.491311
	ENSMUSG00000022687	0.310703	5.75412	4.16423	0.0412861	0.491311
	ENSMUSG00000026234	0.351699	6.9632	4.16363	0.0413007	0.491311
	ENSMUSG00000024276	0.600261	4.19398	4.15691	0.0414649	0.492096
	ENSMUSG00000022386	0.396847	5.07876	4.14691	0.0417106	0.493289
	ENSMUSG00000001768	-0.331305	8.21854	4.14481	0.0417624	0.493289
	ENSMUSG00000069272	-0.656672	5.75897	4.12806	0.0421778	0.495882
	ENSMUSG00000079523	-0.485922	7.67546	4.12797	0.04218	0.495882
	ENSMUSG00000021423	-0.658984	5.09589	4.12114	0.0423506	0.496722
	ENSMUSG00000016918	0.495271	7.27921	4.10504	0.0427555	0.5003
	ENSMUSG00000049672	0.317244	7.18961	4.09972	0.0428904	0.500708
	ENSMUSG00000022305	-0.545819	5.24227	4.09047	0.0431257	0.501218
	ENSMUSG00000036086	-0.640537	3.93408	4.09013	0.0431343	0.501218
	ENSMUSG00000028184	-0.498845	4.71318	4.08127	0.0433611	0.502688
	ENSMUSG00000042410	-0.296393	7.24847	4.07243	0.0435884	0.502946
	ENSMUSG00000034842	0.401768	7.47009	4.07179	0.0436051	0.502946
	ENSMUSG00000084817	0.606434	4.17537	4.06871	0.0436847	0.502946
	ENSMUSG00000035305	0.742005	4.97138	4.06353	0.0438188	0.503333
	ENSMUSG00000073409	-0.445691	7.77701	4.05335	0.0440838	0.503429
	ENSMUSG00000048779	-0.545527	4.86331	4.05216	0.044115	0.503429
	ENSMUSG00000020282	0.522413	5.40308	4.05163	0.0441287	0.503429
	ENSMUSG00000002870	-0.590855	3.97034	4.04407	0.0443269	0.50454
	ENSMUSG00000082286	-0.344094	6.40434	4.03132	0.044663	0.507214
	ENSMUSG00000026600	-0.628891	6.69772	4.0029	0.0454221	0.514155
	ENSMUSG00000001383	0.247309	6.68509	4.00077	0.0454795	0.514155
	ENSMUSG00000038967	0.393499	6.94858	3.98387	0.0459379	0.517937
	ENSMUSG00000093077	-0.907893	7.15926	3.98083	0.0460209	0.517937
	ENSMUSG00000039607	0.313634	8.9473	3.97373	0.0462153	0.518149
	ENSMUSG00000022978	-0.614168	3.72693	3.97239	0.0462522	0.518149
	ENSMUSG00000020914	-0.873874	4.67411	3.96882	0.0463502	0.518149
	ENSMUSG00000074743	0.737799	6.01523	3.96339	0.0465	0.518666
	ENSMUSG00000027102	0.691351	4.51104	3.95311	0.0467849	0.520685
	ENSMUSG00000020044	0.431533	8.81222	3.9462	0.0469773	0.521614
	ENSMUSG00000027306	-0.63363	5.26803	3.94264	0.0470767	0.521614
	ENSMUSG00000043091	-0.410396	6.53524	3.93305	0.0473461	0.52344
	ENSMUSG00000051041	0.274609	8.21797	3.92431	0.0475927	0.525008
	ENSMUSG00000029456	0.413906	4.98138	3.91274	0.0479214	0.527472
	ENSMUSG00000072620	-0.641261	5.55548	3.90363	0.0481819	0.529176
	ENSMUSG00000070720	0.842219	4.04787	3.89777	0.0483501	0.529405
	ENSMUSG00000085471	-0.66509	3.67608	3.88684	0.048666	0.529405
	ENSMUSG00000072704	0.266778	9.70439	3.88153	0.04882	0.529405
	ENSMUSG00000021322	-0.529147	4.55819	3.8803	0.0488558	0.529405
	ENSMUSG00000036941	0.330926	4.9699	3.87251	0.0490832	0.529405
	ENSMUSG00000020988	0.562519	3.69331	3.87042	0.0491442	0.529405
	ENSMUSG00000029816	-1.09508	9.61694	3.86982	0.0491617	0.529405
	ENSMUSG00000028476	0.426667	5.87244	3.86433	0.049323	0.529405
	ENSMUSG00000028906	-0.289823	7.61561	3.85992	0.0494528	0.529405
	ENSMUSG00000039263	0.34514	7.13741	3.85231	0.0496776	0.529405
	ENSMUSG00000023723	-0.361467	4.99298	3.84961	0.0497577	0.529405
	ENSMUSG00000086513	-0.46911	4.39587	3.84744	0.049822	0.529405
	ENSMUSG00000030577	-0.909913	4.68222	3.84466	0.0499045	0.529405
	ENSMUSG00000010608	0.371564	6.01232	3.83896	0.0500746	0.529405
	ENSMUSG00000034158	0.307292	5.38698	3.83748	0.0501187	0.529405
	ENSMUSG00000022231	0.525206	6.92319	3.83527	0.0501848	0.529405
	ENSMUSG00000028874	-0.682536	5.38234	3.83276	0.0502602	0.529405
	ENSMUSG00000056602	0.45302	8.52891	3.8269	0.0504362	0.529405
	ENSMUSG00000020458	-0.338227	10.255	3.82418	0.0505179	0.529405
	ENSMUSG00000067786	0.860523	5.53231	3.82328	0.0505453	0.529405
	ENSMUSG00000022901	-0.480749	4.70386	3.82265	0.0505641	0.529405
	ENSMUSG00000079507	-0.415538	4.74182	3.82032	0.0506347	0.529405
	ENSMUSG00000026669	-0.719424	4.21741	3.80849	0.0509933	0.529405
	ENSMUSG00000040488	0.451042	6.23229	3.80567	0.0510794	0.529405
	ENSMUSG00000023921	0.31951	9.0349	3.80456	0.0511131	0.529405
	ENSMUSG00000038886	0.289547	8.38957	3.79588	0.0513789	0.529405
	ENSMUSG00000023348	0.417753	5.08326	3.79327	0.051459	0.529405
	ENSMUSG00000002031	-0.387873	5.4438	3.78465	0.0517248	0.529405
	ENSMUSG00000022808	-0.434486	4.93023	3.78058	0.0518507	0.529405
	ENSMUSG00000006262	0.292159	6.7775	3.77986	0.0518729	0.529405
	ENSMUSG00000039853	0.476973	4.39552	3.77789	0.0519342	0.529405
	ENSMUSG00000079293	-0.687631	7.44472	3.7767	0.051971	0.529405
	ENSMUSG00000058385	-0.564577	6.48964	3.77591	0.0519955	0.529405
	ENSMUSG00000046574	0.475757	5.00979	3.77553	0.0520076	0.529405
	ENSMUSG00000020592	-0.554027	6.27794	3.7679	0.0522452	0.529405
	ENSMUSG00000030579	-0.857911	3.75748	3.76674	0.0522814	0.529405
	ENSMUSG00000027408	-0.482347	5.51769	3.76596	0.0523058	0.529405
	ENSMUSG00000028896	-0.379095	5.28633	3.76563	0.0523162	0.529405
	ENSMUSG00000027326	-0.786746	4.40546	3.76534	0.0523253	0.529405
	ENSMUSG00000001020	-0.760274	5.15491	3.75907	0.0525218	0.530322
	ENSMUSG00000063931	-0.240349	8.07349	3.74185	0.0530655	0.534435
	ENSMUSG00000041695	-0.701043	6.23513	3.73588	0.0532556	0.534435
	ENSMUSG00000020948	-0.302482	5.7514	3.73204	0.0533782	0.534435
	ENSMUSG00000066245	-0.31319	7.5453	3.73137	0.0533995	0.534435
	ENSMUSG00000027068	-0.768471	6.40826	3.72138	0.05372	0.534435
	ENSMUSG00000022884	0.264141	8.56736	3.71832	0.0538186	0.534435
	ENSMUSG00000084883	0.569779	4.08815	3.71771	0.0538383	0.534435
	ENSMUSG00000042628	-0.2732	7.65323	3.71384	0.053963	0.534435
	ENSMUSG00000056962	-0.468871	4.79064	3.71136	0.0540434	0.534435
	ENSMUSG00000030315	-0.34567	6.17701	3.70914	0.0541153	0.534435
	ENSMUSG00000027009	-0.517248	6.01882	3.70654	0.0541995	0.534435
	ENSMUSG00000038217	0.508631	5.00553	3.70062	0.0543924	0.534435
	ENSMUSG00000032534	0.352181	5.51166	3.69911	0.0544414	0.534435
	ENSMUSG00000041895	-0.319479	5.95872	3.69738	0.0544979	0.534435
	ENSMUSG00000027737	-1.017	4.33835	3.68979	0.0547464	0.534435
	ENSMUSG00000026662	-0.408568	4.40565	3.68744	0.0548237	0.534435
	ENSMUSG00000027797	-0.521762	6.01976	3.68607	0.0548687	0.534435
	ENSMUSG00000041241	0.402722	4.91367	3.68346	0.0549547	0.534435
	ENSMUSG00000069267	-0.739834	6.43585	3.67543	0.0552199	0.534435
	ENSMUSG00000023828	0.339654	6.61462	3.67262	0.0553131	0.534435
	ENSMUSG00000036585	0.406408	10.1257	3.66837	0.0554543	0.534435
	ENSMUSG00000028152	0.534879	4.88368	3.66353	0.0556158	0.534435
	ENSMUSG00000020097	-0.254008	8.35404	3.6622	0.0556601	0.534435
	ENSMUSG00000034853	1.30554	4.65965	3.65978	0.0557411	0.534435
	ENSMUSG00000058099	-0.540151	4.86191	3.65296	0.0559696	0.534435
	ENSMUSG00000051748	-0.953529	7.27083	3.65092	0.0560383	0.534435
	ENSMUSG00000022401	0.437138	4.63005	3.64966	0.0560807	0.534435
	ENSMUSG00000038930	0.436832	5.79299	3.64964	0.0560815	0.534435
	ENSMUSG00000054079	-0.245351	6.96773	3.6443	0.0562616	0.534435
	ENSMUSG00000041130	0.520351	4.44004	3.64388	0.0562758	0.534435
	ENSMUSG00000097379	0.580932	3.85072	3.64282	0.0563114	0.534435
	ENSMUSG00000027447	-0.2753	11.5526	3.63932	0.05643	0.534435
	ENSMUSG00000060216	-0.334058	7.49189	3.63592	0.0565455	0.534435
	ENSMUSG00000054277	-0.253837	6.33516	3.63028	0.0567372	0.534435
	ENSMUSG00000050965	0.471232	5.06754	3.62234	0.0570087	0.534435
	ENSMUSG00000022770	0.365551	5.69163	3.62003	0.0570879	0.534435
	ENSMUSG00000029534	0.353748	5.15675	3.61602	0.0572257	0.534435
	ENSMUSG00000031613	-0.751958	5.99926	3.6156	0.0572402	0.534435
	ENSMUSG00000017670	-0.357954	4.81052	3.61543	0.0572459	0.534435
	ENSMUSG00000022749	-0.212468	7.84189	3.61334	0.057318	0.534435
	ENSMUSG00000037331	0.566497	3.94691	3.61306	0.0573277	0.534435
	ENSMUSG00000026395	-0.537547	7.48253	3.61017	0.0574272	0.534435
	ENSMUSG00000016503	0.319253	5.5208	3.6069	0.0575404	0.534435
	ENSMUSG00000020250	-0.241103	7.05681	3.60447	0.0576245	0.534435
	ENSMUSG00000087691	-0.59452	4.17802	3.59156	0.0580737	0.537606
	ENSMUSG00000033933	-0.401029	6.74989	3.58516	0.0582976	0.538683
	ENSMUSG00000069273	-0.412497	5.45858	3.58093	0.0584466	0.539065
	ENSMUSG00000061068	-0.690103	4.85784	3.57339	0.0587123	0.540254
	ENSMUSG00000006403	-0.91584	4.4385	3.57116	0.0587913	0.540254
	ENSMUSG00000097350	0.638131	3.69132	3.56429	0.059035	0.540635
	ENSMUSG00000026003	0.43133	7.63841	3.56102	0.0591515	0.540635
	ENSMUSG00000052763	0.361563	5.76098	3.55308	0.0594349	0.540635
	ENSMUSG00000037544	-0.932001	3.89891	3.55212	0.0594694	0.540635
	ENSMUSG00000029672	-0.39631	6.10142	3.54972	0.0595553	0.540635
	ENSMUSG00000063171	0.449517	5.68139	3.54792	0.05962	0.540635
	ENSMUSG00000098148	0.500419	4.03983	3.54538	0.0597113	0.540635
	ENSMUSG00000062808	-0.713428	4.81592	3.54341	0.0597826	0.540635
	ENSMUSG00000020160	0.768522	5.15865	3.5428	0.0598043	0.540635
	ENSMUSG00000035314	0.471883	5.42672	3.53402	0.0601218	0.540738
	ENSMUSG00000028101	-0.489524	4.05254	3.5309	0.0602352	0.540738
	ENSMUSG00000020901	-0.728759	5.87951	3.52982	0.0602742	0.540738
	ENSMUSG00000053062	0.294976	6.58033	3.5298	0.0602751	0.540738
	ENSMUSG00000090266	-0.428311	4.59751	3.52759	0.0603555	0.540738
	ENSMUSG00000030421	0.538669	3.75263	3.52146	0.0605791	0.541772
	ENSMUSG00000042249	-0.355674	6.16483	3.51478	0.0608239	0.542079
	ENSMUSG00000023944	0.252701	10.4054	3.51461	0.06083	0.542079
	ENSMUSG00000030811	-0.582761	3.82017	3.49655	0.0614968	0.545568
	ENSMUSG00000082209	-0.300785	6.7229	3.49585	0.0615229	0.545568
	ENSMUSG00000044017	0.417818	7.91783	3.49517	0.0615482	0.545568
	ENSMUSG00000037353	0.483531	6.3851	3.48986	0.0617457	0.546352
	ENSMUSG00000020897	-0.608227	3.69292	3.4865	0.0618714	0.546498
	ENSMUSG00000006585	-0.53018	4.90298	3.48352	0.0619827	0.546517
	ENSMUSG00000026223	-0.280014	8.1703	3.47644	0.0622484	0.547895
	ENSMUSG00000061615	-0.795806	6.09212	3.47244	0.0623993	0.547904
	ENSMUSG00000007041	-0.433965	7.47522	3.46791	0.0625704	0.547904
	ENSMUSG00000047153	-0.573974	3.63226	3.46731	0.0625929	0.547904
	ENSMUSG00000050103	0.312405	6.89155	3.46483	0.062687	0.547904
	ENSMUSG00000023571	0.338372	8.16842	3.45545	0.0630436	0.550061
	ENSMUSG00000016024	-0.522403	9.69204	3.45148	0.0631953	0.550425
	ENSMUSG00000029386	0.501484	4.29296	3.44854	0.0633077	0.550447
	ENSMUSG00000036943	-0.565967	5.57386	3.4436	0.0634972	0.550819
	ENSMUSG00000061816	0.484526	6.10203	3.4404	0.0636203	0.550819
	ENSMUSG00000037337	-0.590015	5.29763	3.4385	0.0636934	0.550819
	ENSMUSG00000032097	0.807353	4.0694	3.43599	0.0637904	0.550819
	ENSMUSG00000050345	0.518053	3.93146	3.42756	0.0641169	0.552686
	ENSMUSG00000092035	-0.755819	5.90099	3.41502	0.0646057	0.55521
	ENSMUSG00000052798	-0.26383	5.93402	3.41436	0.0646315	0.55521
	ENSMUSG00000035885	0.335367	10.975	3.40273	0.0650887	0.555667
	ENSMUSG00000050199	-0.352186	7.78392	3.40222	0.0651087	0.555667
	ENSMUSG00000003062	-0.379717	5.83741	3.398	0.0652754	0.555667
	ENSMUSG00000030653	-0.296415	8.38062	3.39753	0.065294	0.555667
	ENSMUSG00000015837	-0.21247	9.0527	3.39657	0.0653322	0.555667
	ENSMUSG00000001270	-0.649416	6.34555	3.39611	0.0653504	0.555667
	ENSMUSG00000024258	-0.395485	4.53946	3.38859	0.0656493	0.556718
	ENSMUSG00000002332	-0.364026	4.79469	3.3874	0.0656963	0.556718
	ENSMUSG00000024030	-0.435595	8.52225	3.37206	0.0663108	0.55906
	ENSMUSG00000002289	-0.399522	10.9628	3.37184	0.0663198	0.55906
	ENSMUSG00000009687	-0.387329	7.82874	3.36957	0.0664112	0.55906
	ENSMUSG00000061991	-0.61584	6.65169	3.36289	0.0666809	0.55906
	ENSMUSG00000034858	0.339516	6.71929	3.36278	0.0666856	0.55906
	ENSMUSG00000049538	-0.726983	4.91949	3.35895	0.0668406	0.55906
	ENSMUSG00000030779	0.294366	6.07283	3.35249	0.0671034	0.55906
	ENSMUSG00000027423	-0.423811	5.24165	3.3516	0.0671399	0.55906
	ENSMUSG00000004561	-0.270448	5.94171	3.35051	0.067184	0.55906
	ENSMUSG00000024795	-0.554926	3.94065	3.34771	0.0672987	0.55906
	ENSMUSG00000033417	-0.306501	4.757	3.34641	0.0673517	0.55906
	ENSMUSG00000038187	-0.260871	6.78023	3.34577	0.0673781	0.55906
	ENSMUSG00000074646	0.542748	3.94464	3.3441	0.0674464	0.55906
	ENSMUSG00000050930	0.443522	4.68737	3.34193	0.0675355	0.55906
	ENSMUSG00000046223	-0.585332	4.81275	3.33587	0.0677844	0.560194
	ENSMUSG00000030203	0.254501	6.7496	3.32621	0.068184	0.560665
	ENSMUSG00000030605	-0.581481	3.79379	3.3257	0.0682051	0.560665
	ENSMUSG00000028381	-0.310291	6.44778	3.32569	0.0682052	0.560665
	ENSMUSG00000020122	-0.276048	7.09941	3.32367	0.0682892	0.560665
	ENSMUSG00000044749	0.486894	7.24351	3.31683	0.0685739	0.562082
	ENSMUSG00000066113	0.818873	4.21306	3.30376	0.0691214	0.564924
	ENSMUSG00000038080	0.401205	5.49102	3.30317	0.0691463	0.564924
	ENSMUSG00000060063	-0.507316	6.84929	3.29203	0.0696169	0.566592
	ENSMUSG00000060950	-0.365891	5.32985	3.28922	0.0697361	0.566592
	ENSMUSG00000004952	-0.340318	6.18072	3.28872	0.0697574	0.566592
	ENSMUSG00000069268	-0.660908	4.63999	3.28254	0.0700205	0.566592
	ENSMUSG00000022853	0.723179	4.31385	3.28168	0.070057	0.566592
	ENSMUSG00000000317	-0.396269	6.43624	3.28048	0.0701083	0.566592
	ENSMUSG00000030161	0.23341	8.26387	3.27968	0.0701424	0.566592
	ENSMUSG00000021339	0.276227	6.82069	3.27199	0.0704721	0.567308
	ENSMUSG00000021482	0.252405	6.25306	3.26984	0.0705645	0.567308
	ENSMUSG00000064373	-0.304907	10.9353	3.26969	0.0705708	0.567308
	ENSMUSG00000025510	-0.550948	4.66784	3.25749	0.0710977	0.570628
	ENSMUSG00000025245	-0.398246	4.40462	3.24477	0.0716517	0.572805
	ENSMUSG00000002265	0.658336	7.63603	3.24386	0.0716915	0.572805
	ENSMUSG00000046688	-0.412307	6.74952	3.24339	0.0717122	0.572805
	ENSMUSG00000015653	0.910716	3.77848	3.23836	0.0719328	0.573652
	ENSMUSG00000066568	0.243853	6.05158	3.23467	0.0720948	0.574031
	ENSMUSG00000040481	0.400965	4.97281	3.22928	0.0723325	0.57462
	ENSMUSG00000052539	0.318689	5.31219	3.22779	0.0723983	0.57462
	ENSMUSG00000020091	0.623444	3.67598	3.22281	0.0726186	0.575457
	ENSMUSG00000030424	0.453438	4.21784	3.21817	0.0728249	0.575958
	ENSMUSG00000046275	0.391716	9.91489	3.21532	0.072952	0.575958
	ENSMUSG00000026596	-0.510524	3.99619	3.21364	0.0730269	0.575958
	ENSMUSG00000068855	-0.377225	6.69212	3.21101	0.0731445	0.575978
	ENSMUSG00000028469	0.387167	5.09692	3.20797	0.0732805	0.576144
	ENSMUSG00000012187	0.616577	4.87853	3.20054	0.0736137	0.577132
	ENSMUSG00000067722	0.280284	6.2996	3.20004	0.0736367	0.577132
	ENSMUSG00000036242	0.468312	5.0563	3.18761	0.0741983	0.580625
	ENSMUSG00000003949	0.6953	5.60679	3.18492	0.0743205	0.580674
	ENSMUSG00000030452	-0.218231	7.62897	3.17996	0.0745467	0.581139
	ENSMUSG00000029478	0.340916	5.36975	3.17852	0.0746121	0.581139
	ENSMUSG00000036391	0.264446	7.10258	3.16791	0.0750985	0.58303
	ENSMUSG00000003660	0.20223	8.29426	3.16743	0.0751207	0.58303
	ENSMUSG00000030157	-0.408308	4.93415	3.16561	0.0752042	0.58303
	ENSMUSG00000020700	-0.40056	4.23121	3.14599	0.0761137	0.589169
	ENSMUSG00000029817	-0.247846	6.19229	3.14209	0.0762962	0.589291
	ENSMUSG00000020893	0.605451	7.32451	3.13912	0.0764349	0.589291
	ENSMUSG00000025885	0.881701	5.33759	3.13644	0.0765606	0.589291
	ENSMUSG00000001707	-0.383283	5.95711	3.13521	0.0766185	0.589291
	ENSMUSG00000029530	-0.668666	3.52314	3.1331	0.0767177	0.589291
	ENSMUSG00000043067	-0.243349	7.28851	3.1289	0.0769157	0.589907
	ENSMUSG00000097353	0.427894	5.43959	3.1258	0.0770618	0.590124
	ENSMUSG00000001786	0.423601	4.37824	3.11508	0.0775705	0.591342
	ENSMUSG00000028532	0.395698	6.30934	3.11077	0.0777763	0.591342
	ENSMUSG00000031647	-0.622118	4.08501	3.10851	0.0778842	0.591342
	ENSMUSG00000028832	-0.531946	5.24966	3.10785	0.0779156	0.591342
	ENSMUSG00000034687	0.64785	4.83611	3.10637	0.0779867	0.591342
	ENSMUSG00000051212	-0.502922	3.94454	3.10346	0.0781261	0.591342
	ENSMUSG00000043832	-0.517008	6.08144	3.10085	0.0782516	0.591342
	ENSMUSG00000024168	0.323379	5.7925	3.09917	0.0783321	0.591342
	ENSMUSG00000001942	0.432904	4.58597	3.09775	0.0784005	0.591342
	ENSMUSG00000057219	-0.393696	3.98717	3.0953	0.0785185	0.591342
	ENSMUSG00000028249	-0.376804	5.57098	3.09476	0.0785446	0.591342
	ENSMUSG00000030772	0.739263	6.07516	3.09283	0.0786378	0.591342
	ENSMUSG00000030536	-0.277345	9.62991	3.08959	0.0787945	0.591487
	ENSMUSG00000039050	-0.269435	5.41233	3.08677	0.0789314	0.591487
	ENSMUSG00000021550	0.371855	4.54173	3.08486	0.0790241	0.591487
	ENSMUSG00000044792	0.248188	7.61367	3.08269	0.0791294	0.591487
	ENSMUSG00000046230	0.289609	8.34432	3.07851	0.0793334	0.592127
	ENSMUSG00000001065	0.427043	4.82369	3.07545	0.0794825	0.592358
	ENSMUSG00000030660	-0.379148	5.39082	3.07122	0.0796894	0.592361
	ENSMUSG00000010663	0.472919	7.31602	3.0693	0.0797837	0.592361
	ENSMUSG00000032850	0.629675	3.53227	3.0682	0.0798378	0.592361
	ENSMUSG00000029469	0.57849	4.66103	3.06502	0.079994	0.592418
	ENSMUSG00000054484	-0.298117	5.52303	3.06227	0.0801297	0.592418
	ENSMUSG00000019889	0.272694	7.21019	3.06084	0.0802003	0.592418
	ENSMUSG00000024747	-0.645747	7.11648	3.05287	0.0805947	0.594454
	ENSMUSG00000089847	-0.336152	5.16476	3.0412	0.0811759	0.596219
	ENSMUSG00000060733	-0.34324	5.38397	3.03969	0.0812512	0.596219
	ENSMUSG00000048537	0.500134	6.58447	3.03895	0.0812885	0.596219
	ENSMUSG00000051177	0.339132	6.59865	3.03852	0.0813102	0.596219
	ENSMUSG00000019997	0.778876	6.22125	3.03341	0.0815666	0.597004
	ENSMUSG00000018362	-0.322235	6.05619	3.03125	0.0816749	0.597004
	ENSMUSG00000032698	-0.414219	5.39671	3.02832	0.0818229	0.597004
	ENSMUSG00000022636	-0.444048	6.07436	3.02691	0.081894	0.597004
	ENSMUSG00000036863	0.577654	3.72559	3.01579	0.0824575	0.597423
	ENSMUSG00000098112	-0.652279	3.65737	3.01311	0.0825939	0.597423
	ENSMUSG00000021115	-0.232461	6.54627	3.00977	0.0827642	0.597423
	ENSMUSG00000024897	0.487872	4.43741	3.00924	0.0827911	0.597423
	ENSMUSG00000020185	-0.562741	4.08763	3.00875	0.0828163	0.597423
	ENSMUSG00000020527	0.440354	4.31104	3.00768	0.0828706	0.597423
	ENSMUSG00000033871	0.650849	5.1929	3.00724	0.0828934	0.597423
	ENSMUSG00000074622	-0.459057	6.73602	3.0017	0.0831773	0.597423
	ENSMUSG00000044147	-0.342113	6.28112	2.9991	0.0833106	0.597423
	ENSMUSG00000006641	0.771127	4.58355	2.99634	0.0834528	0.597423
	ENSMUSG00000025586	0.414695	4.48757	2.99199	0.0836773	0.597423
	ENSMUSG00000040918	0.402284	4.64052	2.99158	0.0836987	0.597423
	ENSMUSG00000069515	-0.615929	8.68055	2.98628	0.0839731	0.597423
	ENSMUSG00000020473	0.442435	8.17717	2.98408	0.084087	0.597423
	ENSMUSG00000049307	-0.668946	4.12096	2.97968	0.0843159	0.597423
	ENSMUSG00000074030	0.530051	4.788	2.97914	0.0843439	0.597423
	ENSMUSG00000079462	0.489173	4.52436	2.97623	0.0844959	0.597423
	ENSMUSG00000079104	-0.328733	6.8585	2.97578	0.0845192	0.597423
	ENSMUSG00000003123	0.423693	9.34436	2.97539	0.0845398	0.597423
	ENSMUSG00000074417	-1.19416	5.17618	2.97534	0.0845424	0.597423
	ENSMUSG00000042042	-0.237491	6.43476	2.97388	0.0846185	0.597423
	ENSMUSG00000029392	0.529066	4.10215	2.97333	0.0846476	0.597423
	ENSMUSG00000074656	-0.244285	6.76519	2.97101	0.0847688	0.597423
	ENSMUSG00000033781	0.316719	6.23227	2.97014	0.0848144	0.597423
	ENSMUSG00000022816	-0.45038	5.22185	2.96598	0.085033	0.597623
	ENSMUSG00000006299	0.241206	7.3783	2.96506	0.0850815	0.597623
	ENSMUSG00000026548	-0.501006	5.51719	2.95833	0.0854362	0.598061
	ENSMUSG00000026782	0.350294	5.75329	2.9571	0.085501	0.598061
	ENSMUSG00000042363	-0.27944	6.76355	2.95492	0.0856165	0.598061
	ENSMUSG00000045502	0.52072	4.29979	2.95483	0.0856216	0.598061
	ENSMUSG00000011257	0.346606	5.34259	2.95048	0.0858518	0.598834
	ENSMUSG00000024601	0.258314	8.58863	2.94173	0.086318	0.600255
	ENSMUSG00000028398	-0.262953	5.99517	2.93846	0.0864933	0.600255
	ENSMUSG00000026374	-0.288759	5.85697	2.93581	0.0866351	0.600255
	ENSMUSG00000020894	0.388838	5.051	2.93436	0.086713	0.600255
	ENSMUSG00000020057	-0.251956	10.3587	2.9343	0.086716	0.600255
	ENSMUSG00000032802	-0.300329	7.6693	2.93321	0.0867746	0.600255
	ENSMUSG00000032641	-0.446219	3.94424	2.92969	0.086964	0.600735
	ENSMUSG00000025024	0.47122	4.07241	2.92299	0.0873262	0.600995
	ENSMUSG00000021621	-0.219572	6.6004	2.92082	0.0874433	0.600995
	ENSMUSG00000035356	0.425069	7.42149	2.91899	0.0875427	0.600995
	ENSMUSG00000053641	-0.26793	5.40374	2.91805	0.0875939	0.600995
	ENSMUSG00000042055	-0.464505	3.85139	2.9179	0.0876017	0.600995
	ENSMUSG00000067787	0.391923	6.34542	2.91296	0.0878704	0.602015
	ENSMUSG00000090145	0.425345	5.12964	2.90952	0.0880581	0.602476
	ENSMUSG00000019122	-0.615551	9.17443	2.90231	0.0884529	0.603344
	ENSMUSG00000042203	0.417608	4.5314	2.90127	0.0885099	0.603344
	ENSMUSG00000022536	0.200394	6.84428	2.89995	0.0885822	0.603344
	ENSMUSG00000001552	0.332067	7.03423	2.89841	0.0886668	0.603344
	ENSMUSG00000020709	-0.498402	4.24845	2.89549	0.0888277	0.603457
	ENSMUSG00000038563	0.365485	4.7061	2.89374	0.0889245	0.603457
	ENSMUSG00000045005	-0.401914	5.67343	2.89121	0.0890642	0.603587
	ENSMUSG00000090698	0.760538	7.60554	2.88685	0.0893053	0.604404
	ENSMUSG00000031447	-0.267843	11.6385	2.88425	0.0894496	0.604563
	ENSMUSG00000018427	-0.271178	6.48597	2.87763	0.0898184	0.606238
	ENSMUSG00000002803	0.413631	3.89766	2.87153	0.0901593	0.607011
	ENSMUSG00000098041	0.415162	4.74916	2.87045	0.0902198	0.607011
	ENSMUSG00000016757	0.286411	5.52268	2.86896	0.090303	0.607011
	ENSMUSG00000038259	-0.603846	3.66235	2.86692	0.0904177	0.607011
	ENSMUSG00000013921	0.576475	5.06747	2.86122	0.0907387	0.608023
	ENSMUSG00000028108	0.499658	4.44039	2.85758	0.0909443	0.608023
	ENSMUSG00000063882	0.212644	8.3874	2.85566	0.0910529	0.608023
	ENSMUSG00000021047	-0.482059	4.22197	2.85564	0.0910541	0.608023
	ENSMUSG00000035898	-0.279213	6.6344	2.84698	0.0915459	0.609585
	ENSMUSG00000044080	0.354812	8.87201	2.84518	0.0916484	0.609585
	ENSMUSG00000069516	-0.597744	12.4123	2.84459	0.0916822	0.609585
	ENSMUSG00000015112	-0.608199	4.96591	2.8375	0.0920876	0.609585
	ENSMUSG00000026014	-0.388118	4.30947	2.83626	0.0921582	0.609585
	ENSMUSG00000029319	0.302635	5.38556	2.83611	0.0921671	0.609585
	ENSMUSG00000004264	0.247818	6.08554	2.83512	0.0922238	0.609585
	ENSMUSG00000041028	0.253362	9.03094	2.83041	0.0924948	0.609585
	ENSMUSG00000032374	-0.422047	7.66504	2.82856	0.0926014	0.609585
	ENSMUSG00000022898	-0.26127	6.29295	2.82414	0.0928567	0.609585
	ENSMUSG00000026358	-1.1835	6.90655	2.82152	0.093008	0.609585
	ENSMUSG00000041538	-0.668766	4.65308	2.81904	0.0931519	0.609585
	ENSMUSG00000026626	0.399446	10.9862	2.81758	0.0932366	0.609585
	ENSMUSG00000096010	-0.31518	6.38855	2.81672	0.0932866	0.609585
	ENSMUSG00000020520	-0.322014	5.93922	2.81198	0.0935627	0.609585
	ENSMUSG00000051469	0.285014	4.92434	2.81155	0.093588	0.609585
	ENSMUSG00000086584	0.394085	4.38495	2.8078	0.0938069	0.609585
	ENSMUSG00000029203	0.186401	7.14217	2.80721	0.0938416	0.609585
	ENSMUSG00000089417	-0.33151	9.15427	2.80558	0.0939371	0.609585
	ENSMUSG00000038545	0.604113	3.67907	2.80519	0.0939598	0.609585
	ENSMUSG00000042333	0.449656	4.12624	2.8037	0.094047	0.609585
	ENSMUSG00000037896	0.426059	3.96329	2.80121	0.094193	0.609585
	ENSMUSG00000048126	-0.355097	9.37061	2.80011	0.094258	0.609585
	ENSMUSG00000038437	0.48072	3.92747	2.7996	0.0942879	0.609585
	ENSMUSG00000041846	-0.33901	4.67899	2.79887	0.094331	0.609585
	ENSMUSG00000016128	0.301545	5.72997	2.79597	0.0945013	0.609899
	ENSMUSG00000054469	-0.508385	4.00214	2.79055	0.0948218	0.610796
	ENSMUSG00000002059	0.297921	6.27769	2.78531	0.0951322	0.610796
	ENSMUSG00000006850	0.526948	4.06117	2.78523	0.095137	0.610796
	ENSMUSG00000043909	0.263017	6.55	2.78398	0.0952114	0.610796
	ENSMUSG00000024493	-0.180927	7.29623	2.77793	0.0955717	0.610796
	ENSMUSG00000038279	0.294928	5.83542	2.77411	0.0958002	0.610796
	ENSMUSG00000017774	0.262825	9.78336	2.77401	0.0958059	0.610796
	ENSMUSG00000026425	-0.267754	6.44311	2.77046	0.0960186	0.610796
	ENSMUSG00000098206	-0.524182	3.77048	2.76972	0.0960628	0.610796
	ENSMUSG00000043279	0.23158	6.37065	2.76526	0.0963308	0.610796
	ENSMUSG00000022285	-0.221707	7.70821	2.76321	0.0964547	0.610796
	ENSMUSG00000020143	-0.487292	4.6516	2.76252	0.0964961	0.610796
	ENSMUSG00000049659	-0.229551	7.00878	2.76209	0.0965222	0.610796
	ENSMUSG00000027378	0.556791	3.6065	2.76054	0.0966159	0.610796
	ENSMUSG00000094026	0.644036	4.1064	2.75927	0.0966925	0.610796
	ENSMUSG00000004056	0.346314	7.41775	2.75925	0.0966933	0.610796
	ENSMUSG00000060427	-0.340921	4.41678	2.75741	0.0968051	0.610796
	ENSMUSG00000036636	-0.20296	7.30203	2.7569	0.0968357	0.610796
	ENSMUSG00000062382	-0.592822	3.82064	2.75326	0.0970565	0.611411
	ENSMUSG00000046447	0.775919	4.08244	2.75127	0.0971772	0.611411
	ENSMUSG00000026674	-0.280887	5.79909	2.74593	0.0975023	0.61195
	ENSMUSG00000035842	0.42824	3.71415	2.74585	0.0975073	0.61195
	ENSMUSG00000048327	-0.614428	4.37068	2.74142	0.0977779	0.61288
	ENSMUSG00000027115	-0.454741	3.9934	2.7376	0.0980118	0.613102
	ENSMUSG00000038252	-0.33183	5.57236	2.73265	0.0983162	0.613102
	ENSMUSG00000026657	-0.368899	4.35635	2.72712	0.0986571	0.613102
	ENSMUSG00000018927	-0.601118	6.07756	2.71904	0.0991574	0.613102
	ENSMUSG00000025277	0.380131	5.09545	2.71822	0.0992086	0.613102
	ENSMUSG00000000958	-0.38609	4.48238	2.71729	0.0992666	0.613102
	ENSMUSG00000035441	0.555365	4.02546	2.71489	0.0994156	0.613102
	ENSMUSG00000073910	0.289618	7.02872	2.71071	0.0996765	0.613102
	ENSMUSG00000057789	-0.505617	3.6787	2.70873	0.0998004	0.613102
	ENSMUSG00000061175	-0.511116	4.46765	2.70833	0.0998256	0.613102
	ENSMUSG00000001334	-0.495879	5.34207	2.70755	0.099874	0.613102
	ENSMUSG00000030101	-0.183728	7.97615	2.70572	0.099989	0.613102
	ENSMUSG00000045838	0.378351	8.83423	2.70423	0.100083	0.613102
	ENSMUSG00000091586	0.342574	5.84062	2.70365	0.100119	0.613102
	ENSMUSG00000049932	-0.553727	3.82597	2.70216	0.100212	0.613102
	ENSMUSG00000089942	-0.54992	4.62951	2.70194	0.100227	0.613102
	ENSMUSG00000029003	-0.289436	5.15933	2.69682	0.100549	0.613102
	ENSMUSG00000095788	-0.82062	4.20467	2.6949	0.10067	0.613102
	ENSMUSG00000040370	0.264454	7.91791	2.69484	0.100674	0.613102
	ENSMUSG00000035258	0.48204	7.41103	2.69417	0.100716	0.613102
	ENSMUSG00000002147	-0.212024	7.04537	2.69187	0.100861	0.613102
	ENSMUSG00000018554	0.606838	4.26034	2.68915	0.101033	0.613102
	ENSMUSG00000042772	0.2033	7.50252	2.68899	0.101044	0.613102
	ENSMUSG00000030551	0.803148	4.78933	2.68594	0.101237	0.613102
	ENSMUSG00000027940	-0.196361	8.49249	2.6854	0.101272	0.613102
	ENSMUSG00000018841	0.267494	5.65202	2.68504	0.101294	0.613102
	ENSMUSG00000027968	-0.231534	6.27683	2.68483	0.101308	0.613102
	ENSMUSG00000039159	0.230637	7.82138	2.68298	0.101426	0.613102
	ENSMUSG00000073563	-0.334573	4.54289	2.68267	0.101445	0.613102
	ENSMUSG00000030282	-0.213157	7.09646	2.68204	0.101486	0.613102
	ENSMUSG00000017561	-0.276984	6.20556	2.68	0.101616	0.613145
	ENSMUSG00000050213	0.475214	3.76403	2.67767	0.101765	0.613306
	ENSMUSG00000069793	-0.350631	5.43135	2.6728	0.102076	0.613691
	ENSMUSG00000048096	1.36553	5.68896	2.67152	0.102159	0.613691
	ENSMUSG00000040033	-0.218241	6.70437	2.66913	0.102312	0.613691
	ENSMUSG00000032372	-0.670984	5.9322	2.66903	0.102319	0.613691
	ENSMUSG00000037573	0.397264	6.8639	2.66567	0.102535	0.614003
	ENSMUSG00000049687	-0.345494	4.98412	2.66146	0.102806	0.614003
	ENSMUSG00000033032	-0.271501	6.7433	2.65778	0.103045	0.614003
	ENSMUSG00000062373	-0.250159	6.74208	2.65744	0.103066	0.614003
	ENSMUSG00000028850	-0.270431	5.52208	2.65673	0.103112	0.614003
	ENSMUSG00000027642	-0.183971	9.15784	2.65668	0.103116	0.614003
	ENSMUSG00000020546	0.362748	4.99354	2.65494	0.103229	0.614003
	ENSMUSG00000020272	-0.202614	6.72101	2.6497	0.10357	0.614216
	ENSMUSG00000054021	0.392651	4.9239	2.64788	0.103688	0.614216
	ENSMUSG00000038406	0.281969	6.73792	2.64565	0.103834	0.614216
	ENSMUSG00000051669	0.603596	4.98811	2.64547	0.103846	0.614216
	ENSMUSG00000021182	-0.415303	5.49009	2.6417	0.104092	0.614216
	ENSMUSG00000025982	-0.192609	8.13835	2.64134	0.104115	0.614216
	ENSMUSG00000052928	0.306584	5.89645	2.6404	0.104177	0.614216
	ENSMUSG00000039953	0.251026	6.97245	2.63906	0.104265	0.614216
	ENSMUSG00000055239	0.33037	5.24037	2.63749	0.104368	0.614216
	ENSMUSG00000038122	0.290982	6.80618	2.63278	0.104678	0.615317
	ENSMUSG00000003545	1.26073	4.09213	2.63033	0.10484	0.615544
	ENSMUSG00000033793	-0.274786	6.16214	2.62503	0.10519	0.616712
	ENSMUSG00000022372	-0.477938	5.67347	2.6236	0.105285	0.616712
	ENSMUSG00000033450	0.668823	5.53755	2.61936	0.105567	0.616805
	ENSMUSG00000002222	0.267446	5.67304	2.61798	0.105659	0.616805
	ENSMUSG00000022867	-0.244613	5.66022	2.61781	0.10567	0.616805
	ENSMUSG00000029014	-0.313551	5.07005	2.61511	0.10585	0.617134
	ENSMUSG00000075031	-0.560308	6.65267	2.61143	0.106096	0.617725
	ENSMUSG00000029994	-0.259923	8.4166	2.60991	0.106198	0.617725
	ENSMUSG00000007039	-0.368489	4.55778	2.60256	0.106692	0.619875
	ENSMUSG00000095079	0.902346	6.28218	2.59798	0.107	0.620941
	ENSMUSG00000059273	0.2383	7.12901	2.5945	0.107236	0.620941
	ENSMUSG00000021846	0.252201	7.73507	2.59252	0.107369	0.620941
	ENSMUSG00000031661	0.554069	5.36754	2.5925	0.107371	0.620941
	ENSMUSG00000027247	-0.270096	5.29312	2.58924	0.107592	0.621099
	ENSMUSG00000028104	0.344834	6.07231	2.58844	0.107646	0.621099
	ENSMUSG00000071337	-0.339874	6.01498	2.58573	0.107831	0.621447
	ENSMUSG00000082179	0.491974	9.20948	2.58018	0.108209	0.621615
	ENSMUSG00000010660	0.519276	4.50021	2.57903	0.108288	0.621615
	ENSMUSG00000024194	0.271836	6.56939	2.57839	0.108332	0.621615
	ENSMUSG00000040699	-0.232456	6.39541	2.57803	0.108356	0.621615
	ENSMUSG00000010554	0.236537	6.41373	2.57372	0.108652	0.621796
	ENSMUSG00000097330	0.337445	5.84327	2.5715	0.108805	0.621796
	ENSMUSG00000007872	0.319225	9.13938	2.57051	0.108872	0.621796
	ENSMUSG00000030532	0.229882	7.15618	2.56869	0.108998	0.621796
	ENSMUSG00000097451	0.441376	4.39642	2.56803	0.109043	0.621796
	ENSMUSG00000070031	-0.330364	5.79624	2.56674	0.109133	0.621796
	ENSMUSG00000040268	-0.343333	4.58986	2.56219	0.109447	0.622622
	ENSMUSG00000097324	0.633765	7.00009	2.55881	0.109681	0.622622
	ENSMUSG00000051344	-0.305643	6.93043	2.55851	0.109702	0.622622
	ENSMUSG00000027998	0.293819	5.2781	2.55585	0.109886	0.622622
	ENSMUSG00000021192	-0.169107	7.52139	2.55567	0.109899	0.622622
	ENSMUSG00000033306	0.370212	4.93997	2.55143	0.110194	0.622774
	ENSMUSG00000031443	-0.830829	5.39108	2.54956	0.110325	0.622774
	ENSMUSG00000030447	-0.216197	8.80484	2.5491	0.110357	0.622774
	ENSMUSG00000039886	0.478262	7.68674	2.54815	0.110424	0.622774
	ENSMUSG00000041915	-0.32971	4.83428	2.54138	0.110898	0.624747
	ENSMUSG00000074220	-0.28634	4.52707	2.53665	0.111231	0.625218
	ENSMUSG00000022555	0.534898	4.69959	2.53664	0.111231	0.625218
	ENSMUSG00000052593	-0.325257	5.11532	2.53432	0.111395	0.625243
	ENSMUSG00000028487	0.439419	5.05339	2.53304	0.111486	0.625243
	ENSMUSG00000067336	0.220685	6.25002	2.52975	0.111718	0.625358
	ENSMUSG00000022313	-0.383151	3.99104	2.52688	0.111922	0.625358
	ENSMUSG00000020019	0.466934	4.7927	2.52682	0.111925	0.625358
	ENSMUSG00000021097	0.553014	7.01031	2.52569	0.112006	0.625358
	ENSMUSG00000032741	0.333778	4.18807	2.51638	0.112669	0.628363
	ENSMUSG00000076612	1.71256	6.15978	2.50958	0.113156	0.629856
	ENSMUSG00000053040	-0.623061	6.28207	2.50905	0.113194	0.629856
	ENSMUSG00000024516	-0.326003	5.70027	2.50738	0.113314	0.629856
	ENSMUSG00000024135	0.195243	6.41692	2.50557	0.113444	0.62988
	ENSMUSG00000052331	-0.201921	6.66661	2.50357	0.113589	0.629983
	ENSMUSG00000053838	-0.210954	6.62021	2.50059	0.113804	0.630478
	ENSMUSG00000052837	0.672514	6.47487	2.49821	0.113976	0.630732
	ENSMUSG00000019978	0.229902	8.92866	2.49426	0.114262	0.631618
	ENSMUSG00000031949	0.436218	3.56177	2.4887	0.114666	0.632765
	ENSMUSG00000034820	0.538543	3.71913	2.48794	0.114722	0.632765
	ENSMUSG00000044221	0.275223	5.40534	2.48102	0.115227	0.634854
	ENSMUSG00000038740	0.383791	5.03978	2.47861	0.115405	0.635131
	ENSMUSG00000034832	-0.27681	5.37353	2.47487	0.115679	0.635941
	ENSMUSG00000041801	0.492194	7.60847	2.47062	0.115992	0.636964
	ENSMUSG00000018572	-0.256493	5.80133	2.46704	0.116257	0.637717
	ENSMUSG00000022474	0.308923	7.01156	2.4645	0.116445	0.637879
	ENSMUSG00000055413	-0.277447	6.57596	2.46183	0.116643	0.637879
	ENSMUSG00000063870	-0.166141	8.87716	2.46149	0.116668	0.637879
	ENSMUSG00000026393	0.220338	7.98254	2.45748	0.116966	0.638811
	ENSMUSG00000022807	-0.303432	5.53405	2.45324	0.117283	0.638878
	ENSMUSG00000038838	0.297776	6.46886	2.45201	0.117374	0.638878
	ENSMUSG00000066647	0.331358	4.76181	2.45158	0.117407	0.638878
	ENSMUSG00000043962	0.285075	4.9816	2.45048	0.117489	0.638878
	ENSMUSG00000028059	-0.215819	7.44421	2.44685	0.117761	0.639664
	ENSMUSG00000027533	-0.393368	7.16903	2.43537	0.118626	0.643666
	ENSMUSG00000097032	0.490474	3.7334	2.42994	0.119038	0.644101
	ENSMUSG00000044548	0.419579	4.63993	2.42954	0.119068	0.644101
	ENSMUSG00000020256	-0.527514	3.67669	2.42667	0.119286	0.644101
	ENSMUSG00000054814	0.393935	4.07555	2.42641	0.119306	0.644101
	ENSMUSG00000056596	0.712669	3.95853	2.42584	0.119349	0.644101
	ENSMUSG00000020359	-0.357054	4.77085	2.42067	0.119744	0.64435
	ENSMUSG00000044847	-0.317214	5.33915	2.42039	0.119765	0.64435
	ENSMUSG00000023961	-0.237179	5.40646	2.41856	0.119905	0.64435
	ENSMUSG00000000489	-0.402971	4.96221	2.41849	0.11991	0.64435
	ENSMUSG00000040584	0.367188	6.20777	2.41558	0.120133	0.644858
	ENSMUSG00000060961	0.456596	7.34188	2.40548	0.120911	0.648336
	ENSMUSG00000079671	0.512275	4.33796	2.40296	0.121106	0.648686
	ENSMUSG00000021136	0.27283	8.36879	2.395	0.121724	0.650671
	ENSMUSG00000057637	0.193031	6.96092	2.39484	0.121736	0.650671
	ENSMUSG00000057396	0.422495	3.88343	2.38921	0.122176	0.650882
	ENSMUSG00000081058	-0.495283	5.25692	2.3891	0.122184	0.650882
	ENSMUSG00000021474	0.40414	5.08944	2.38897	0.122194	0.650882
	ENSMUSG00000030047	-0.712931	4.93761	2.38767	0.122295	0.650882
	ENSMUSG00000001143	0.426807	3.83988	2.3804	0.122866	0.651527
	ENSMUSG00000045287	0.298312	5.15399	2.3794	0.122944	0.651527
	ENSMUSG00000058454	-0.322205	5.64398	2.37851	0.123015	0.651527
	ENSMUSG00000045210	0.40291	3.81775	2.37568	0.123238	0.651527
	ENSMUSG00000056418	0.643061	3.80333	2.37469	0.123316	0.651527
	ENSMUSG00000021260	0.594446	4.4673	2.37469	0.123316	0.651527
	ENSMUSG00000024943	0.191291	7.59934	2.37165	0.123556	0.651527
	ENSMUSG00000022788	-0.459526	4.22487	2.36959	0.123719	0.651527
	ENSMUSG00000036513	-0.214457	6.86893	2.36652	0.123963	0.651527
	ENSMUSG00000001524	-0.343979	5.3651	2.36565	0.124032	0.651527
	ENSMUSG00000047719	0.25433	6.15903	2.36204	0.12432	0.651527
	ENSMUSG00000030739	0.485767	4.75704	2.36121	0.124386	0.651527
	ENSMUSG00000030188	0.282334	4.97399	2.36016	0.12447	0.651527
	ENSMUSG00000030643	-0.368525	4.6543	2.35911	0.124553	0.651527
	ENSMUSG00000074305	-0.386807	4.26167	2.35854	0.124599	0.651527
	ENSMUSG00000042256	-0.440078	5.0293	2.35816	0.124629	0.651527
	ENSMUSG00000026504	-0.269455	5.65461	2.35579	0.124818	0.651527
	ENSMUSG00000001767	-0.208153	7.08899	2.3547	0.124906	0.651527
	ENSMUSG00000036995	-0.313249	5.06238	2.35268	0.125068	0.651527
	ENSMUSG00000020899	0.223176	7.19579	2.35245	0.125086	0.651527
	ENSMUSG00000037098	0.413095	5.24921	2.34862	0.125394	0.651527
	ENSMUSG00000073437	0.456665	3.77177	2.34711	0.125516	0.651527
	ENSMUSG00000085741	-0.420665	3.57701	2.34691	0.125531	0.651527
	ENSMUSG00000032280	0.304332	7.79414	2.34678	0.125542	0.651527
	ENSMUSG00000062960	0.311332	6.87027	2.34243	0.125893	0.651527
	ENSMUSG00000026385	0.411545	3.7288	2.34134	0.125981	0.651527
	ENSMUSG00000038383	-0.26052	5.66854	2.34006	0.126085	0.651527
	ENSMUSG00000005142	-0.27231	8.12808	2.33873	0.126193	0.651527
	ENSMUSG00000063952	0.289779	5.6702	2.33592	0.126421	0.651527
	ENSMUSG00000029394	-0.465521	3.97766	2.33194	0.126744	0.651527
	ENSMUSG00000036158	0.370977	5.59725	2.33142	0.126786	0.651527
	ENSMUSG00000061244	-0.197708	7.73763	2.32889	0.126992	0.651527
	ENSMUSG00000041794	0.379109	6.10157	2.3253	0.127286	0.651527
	ENSMUSG00000026792	0.447295	3.76773	2.32307	0.127469	0.651527
	ENSMUSG00000034940	0.298242	5.19655	2.32241	0.127523	0.651527
	ENSMUSG00000047330	0.595286	5.21899	2.32042	0.127686	0.651527
	ENSMUSG00000024426	0.334295	4.22829	2.31946	0.127765	0.651527
	ENSMUSG00000014470	-0.201523	7.04465	2.31438	0.128182	0.651527
	ENSMUSG00000039218	0.262094	7.26668	2.31361	0.128246	0.651527
	ENSMUSG00000028128	0.422825	8.14826	2.31211	0.12837	0.651527
	ENSMUSG00000029310	-0.219257	6.94304	2.31143	0.128426	0.651527
	ENSMUSG00000027435	-0.43392	6.08726	2.30816	0.128696	0.651527
	ENSMUSG00000022185	0.167003	7.41314	2.30803	0.128707	0.651527
	ENSMUSG00000031843	-0.471499	4.06108	2.30728	0.12877	0.651527
	ENSMUSG00000038418	1.11795	4.61832	2.30693	0.128798	0.651527
	ENSMUSG00000071379	-0.258551	7.59403	2.30664	0.128823	0.651527
	ENSMUSG00000026107	-0.410609	4.80743	2.30626	0.128853	0.651527
	ENSMUSG00000061619	-0.270871	5.73186	2.30505	0.128954	0.651527
	ENSMUSG00000030830	-0.447061	4.44369	2.30312	0.129114	0.651527
	ENSMUSG00000074994	0.318131	5.45215	2.30237	0.129177	0.651527
	ENSMUSG00000042323	-0.340461	4.43442	2.29819	0.129525	0.651527
	ENSMUSG00000072621	-0.654839	4.19529	2.29684	0.129637	0.651527
	ENSMUSG00000018287	0.239744	5.98631	2.29562	0.12974	0.651527
	ENSMUSG00000016356	0.463431	4.13625	2.29302	0.129957	0.651527
	ENSMUSG00000030737	-0.25996	8.30087	2.29021	0.130192	0.651527
	ENSMUSG00000020354	0.382367	4.73811	2.28927	0.130271	0.651527
	ENSMUSG00000030298	-0.274388	6.51188	2.28898	0.130296	0.651527
	ENSMUSG00000034621	0.310014	4.65911	2.28894	0.130299	0.651527
	ENSMUSG00000017291	0.155235	8.56646	2.28759	0.130412	0.651527
	ENSMUSG00000035048	0.228793	6.9283	2.28713	0.130451	0.651527
	ENSMUSG00000018566	0.44307	7.73672	2.28476	0.13065	0.651527
	ENSMUSG00000038623	-0.359793	6.12613	2.28302	0.130797	0.651527
	ENSMUSG00000038608	-0.224133	7.92761	2.28292	0.130805	0.651527
	ENSMUSG00000048878	0.291007	4.93933	2.28219	0.130867	0.651527
	ENSMUSG00000005481	-0.244067	5.20061	2.28212	0.130873	0.651527
	ENSMUSG00000028341	0.852226	3.87594	2.27673	0.131329	0.65283
	ENSMUSG00000022324	0.328617	5.42625	2.27494	0.131481	0.65283
	ENSMUSG00000003810	-0.312035	4.92442	2.27441	0.131525	0.65283
	ENSMUSG00000020176	0.228988	7.11278	2.27061	0.131848	0.65331
	ENSMUSG00000027654	-0.687927	4.19711	2.2702	0.131883	0.65331
	ENSMUSG00000029472	-0.156378	8.54014	2.26609	0.132233	0.65373
	ENSMUSG00000027332	0.310569	9.3196	2.26562	0.132273	0.65373
	ENSMUSG00000021710	-0.229313	8.50195	2.26461	0.132359	0.65373
	ENSMUSG00000000804	0.52035	3.69069	2.26119	0.132652	0.654529
	ENSMUSG00000073599	0.376457	4.29746	2.25893	0.132846	0.654839
	ENSMUSG00000021708	0.290479	6.75594	2.25487	0.133195	0.655917
	ENSMUSG00000049241	0.347302	7.66162	2.25171	0.133467	0.656611
	ENSMUSG00000050587	0.533937	3.77095	2.245	0.134047	0.65676
	ENSMUSG00000056952	0.341349	4.39286	2.24296	0.134224	0.65676
	ENSMUSG00000026142	-0.395061	3.82694	2.24271	0.134246	0.65676
	ENSMUSG00000078532	0.460113	3.53431	2.24185	0.13432	0.65676
	ENSMUSG00000021156	0.153585	9.18045	2.23876	0.134589	0.65676
	ENSMUSG00000028327	-0.8468	3.98031	2.23743	0.134705	0.65676
	ENSMUSG00000053158	-0.379211	5.3964	2.23449	0.134962	0.65676
	ENSMUSG00000016510	0.247218	5.3491	2.23316	0.135077	0.65676
	ENSMUSG00000024659	-0.335718	11.8927	2.2327	0.135117	0.65676
	ENSMUSG00000024924	-0.203926	8.61729	2.23174	0.135202	0.65676
	ENSMUSG00000004473	0.503391	4.15992	2.23115	0.135253	0.65676
	ENSMUSG00000036046	-0.291488	8.89683	2.231	0.135266	0.65676
	ENSMUSG00000022556	0.34108	4.87337	2.22997	0.135356	0.65676
	ENSMUSG00000023027	-0.21053	5.69434	2.22955	0.135393	0.65676
	ENSMUSG00000022801	0.185585	7.49728	2.22829	0.135503	0.65676
	ENSMUSG00000027199	-0.408064	6.41732	2.22724	0.135596	0.65676
	ENSMUSG00000024392	0.225543	6.98536	2.22455	0.135832	0.65727
	ENSMUSG00000030275	0.148811	9.49413	2.219	0.136321	0.658159
	ENSMUSG00000050912	-0.317143	5.55537	2.21762	0.136443	0.658159
	ENSMUSG00000033327	0.279188	10.8147	2.21669	0.136526	0.658159
	ENSMUSG00000028795	-0.216471	5.80371	2.21644	0.136548	0.658159
	ENSMUSG00000028412	-0.36659	3.92056	2.21434	0.136734	0.658159
	ENSMUSG00000018672	0.183857	7.39234	2.21354	0.136804	0.658159
	ENSMUSG00000035764	0.293998	6.71691	2.21066	0.13706	0.658757
	ENSMUSG00000028860	0.549235	4.82357	2.20803	0.137294	0.659247
	ENSMUSG00000016664	-0.176175	6.52157	2.20551	0.137519	0.659277
	ENSMUSG00000023007	0.309047	4.9685	2.20157	0.137871	0.659277
	ENSMUSG00000041870	-0.278553	6.56825	2.20122	0.137902	0.659277
	ENSMUSG00000022800	-0.198986	6.81812	2.20118	0.137905	0.659277
	ENSMUSG00000027655	0.384094	3.85703	2.19934	0.138069	0.659277
	ENSMUSG00000006360	-0.378428	4.81269	2.19893	0.138106	0.659277
	ENSMUSG00000005087	-0.710528	5.42394	2.19765	0.138221	0.659277
	ENSMUSG00000024513	-0.268184	5.68426	2.19228	0.138704	0.660315
	ENSMUSG00000044285	0.219052	7.4776	2.19167	0.138758	0.660315
	ENSMUSG00000002307	-0.286283	6.67696	2.19083	0.138835	0.660315
	ENSMUSG00000020776	0.322418	5.23928	2.18612	0.13926	0.66171
	ENSMUSG00000022629	0.307462	5.90795	2.18345	0.139501	0.662227
	ENSMUSG00000032899	0.641446	3.77208	2.17622	0.140158	0.664318
	ENSMUSG00000021432	-0.282419	4.77154	2.17425	0.140338	0.664318
	ENSMUSG00000047807	0.507945	4.05582	2.17423	0.14034	0.664318
	ENSMUSG00000038544	-0.3915	4.50296	2.17044	0.140686	0.665331
	ENSMUSG00000038398	0.181298	7.29467	2.1673	0.140974	0.665844
	ENSMUSG00000041773	0.312885	8.00029	2.16564	0.141126	0.665844
	ENSMUSG00000041747	-0.232359	6.43262	2.16374	0.1413	0.665844
	ENSMUSG00000021725	-0.376707	5.41579	2.16345	0.141327	0.665844
	ENSMUSG00000018428	0.243557	7.29266	2.16129	0.141526	0.665937
	ENSMUSG00000053333	-0.341186	4.37926	2.15449	0.142154	0.665937
	ENSMUSG00000049676	0.473571	4.21099	2.15304	0.142288	0.665937
	ENSMUSG00000018920	-0.424453	7.11824	2.15035	0.142537	0.665937
	ENSMUSG00000066415	0.188267	7.11881	2.15012	0.142558	0.665937
	ENSMUSG00000028149	-0.267314	4.75966	2.14918	0.142646	0.665937
	ENSMUSG00000026623	-0.290876	6.91664	2.14913	0.142651	0.665937
	ENSMUSG00000033066	-0.364455	7.46742	2.14812	0.142745	0.665937
	ENSMUSG00000042613	0.452693	4.75672	2.14396	0.143132	0.665937
	ENSMUSG00000052305	-0.836384	10.9064	2.14336	0.143188	0.665937
	ENSMUSG00000042532	0.536154	5.72121	2.14304	0.143218	0.665937
	ENSMUSG00000028019	0.373245	5.14354	2.14232	0.143285	0.665937
	ENSMUSG00000064210	-0.155593	8.35452	2.14145	0.143367	0.665937
	ENSMUSG00000000693	-0.342741	5.00197	2.13766	0.143721	0.665937
	ENSMUSG00000083219	0.476081	13.2236	2.13734	0.143751	0.665937
	ENSMUSG00000029135	-0.308945	8.4588	2.13674	0.143807	0.665937
	ENSMUSG00000032782	-0.354609	4.35921	2.13483	0.143987	0.665937
	ENSMUSG00000067736	0.510301	4.81828	2.13454	0.144013	0.665937
	ENSMUSG00000004069	0.283694	5.46257	2.13078	0.144367	0.665937
	ENSMUSG00000028524	0.613051	4.03155	2.1307	0.144375	0.665937
	ENSMUSG00000002083	-0.46077	4.39557	2.13026	0.144416	0.665937
	ENSMUSG00000026187	0.345382	5.43911	2.13019	0.144422	0.665937
	ENSMUSG00000029073	-0.202929	6.26845	2.12666	0.144756	0.665937
	ENSMUSG00000030720	-0.358322	4.60236	2.12572	0.144844	0.665937
	ENSMUSG00000037814	0.456232	3.81673	2.12542	0.144873	0.665937
	ENSMUSG00000031446	0.144645	8.79684	2.12512	0.144901	0.665937
	ENSMUSG00000029385	-0.243498	6.40909	2.12046	0.145343	0.665937
	ENSMUSG00000042293	0.368491	5.1696	2.1203	0.145358	0.665937
	ENSMUSG00000041779	0.248478	5.82173	2.11991	0.145395	0.665937
	ENSMUSG00000018654	-0.295239	5.63707	2.11879	0.145502	0.665937
	ENSMUSG00000059975	0.24457	5.9279	2.11678	0.145693	0.665937
	ENSMUSG00000028300	0.242098	9.54538	2.11574	0.145792	0.665937
	ENSMUSG00000036167	0.18484	7.34257	2.11225	0.146124	0.665937
	ENSMUSG00000008226	0.21717	5.75261	2.11087	0.146257	0.665937
	ENSMUSG00000020528	0.384576	4.02537	2.11025	0.146315	0.665937
	ENSMUSG00000022427	-0.220858	6.18692	2.10954	0.146383	0.665937
	ENSMUSG00000043858	-0.265366	5.39594	2.10942	0.146395	0.665937
	ENSMUSG00000021807	-0.152419	7.89017	2.10937	0.146399	0.665937
	ENSMUSG00000039994	-0.26273	5.19216	2.10586	0.146736	0.6667
	ENSMUSG00000038244	-0.295705	8.1294	2.10352	0.146961	0.6667
	ENSMUSG00000062014	-0.226183	8.71525	2.10346	0.146966	0.6667
	ENSMUSG00000028854	0.204371	6.53656	2.10202	0.147105	0.666724
	ENSMUSG00000030545	0.312273	6.60358	2.09797	0.147494	0.667685
	ENSMUSG00000021051	0.20668	6.37216	2.09696	0.147593	0.667685
	ENSMUSG00000020843	-0.22881	5.38747	2.09565	0.147719	0.667685
	ENSMUSG00000048280	0.330976	4.99271	2.09318	0.147958	0.667685
	ENSMUSG00000000976	0.166612	6.79097	2.09292	0.147983	0.667685
	ENSMUSG00000042997	-0.218238	7.23782	2.09105	0.148164	0.667898
	ENSMUSG00000024247	0.433783	3.93964	2.08833	0.148428	0.668165
	ENSMUSG00000060128	0.323844	5.13826	2.08769	0.14849	0.668165
	ENSMUSG00000058402	-0.362016	4.71821	2.08269	0.148978	0.669757
	ENSMUSG00000024308	-0.209622	10.6344	2.07614	0.149618	0.671881
	ENSMUSG00000040359	-0.232492	5.7438	2.07512	0.149718	0.671881
	ENSMUSG00000018923	-0.244576	5.77212	2.07132	0.150092	0.672499
	ENSMUSG00000034042	0.154073	7.76164	2.07075	0.150148	0.672499
	ENSMUSG00000022754	-0.330003	5.66738	2.06962	0.150259	0.672499
	ENSMUSG00000024190	0.522141	5.0123	2.06755	0.150463	0.672812
	ENSMUSG00000059713	-0.346056	4.36813	2.06534	0.150681	0.672982
	ENSMUSG00000032359	-0.295778	8.15733	2.06444	0.15077	0.672982
	ENSMUSG00000028692	-0.177362	8.02843	2.06111	0.1511	0.673155
	ENSMUSG00000037416	0.215331	6.58012	2.06016	0.151194	0.673155
	ENSMUSG00000025078	0.383318	3.98354	2.05516	0.151692	0.673155
	ENSMUSG00000061410	0.232919	7.99844	2.05455	0.151752	0.673155
	ENSMUSG00000022723	-0.16771	7.77211	2.05449	0.151758	0.673155
	ENSMUSG00000031015	-0.181163	7.74486	2.05338	0.151869	0.673155
	ENSMUSG00000025969	-0.261705	7.13823	2.05196	0.15201	0.673155
	ENSMUSG00000026586	-0.328755	7.07285	2.05186	0.152021	0.673155
	ENSMUSG00000028960	0.175532	7.59745	2.05068	0.152138	0.673155
	ENSMUSG00000040548	0.198842	7.98344	2.05014	0.152192	0.673155
	ENSMUSG00000024077	-0.346334	4.33611	2.04861	0.152345	0.673155
	ENSMUSG00000031787	-0.285745	5.48062	2.04722	0.152485	0.673155
	ENSMUSG00000042419	-0.268317	4.95022	2.04651	0.152556	0.673155
	ENSMUSG00000039701	0.294315	6.78516	2.04239	0.152969	0.673643
	ENSMUSG00000032519	-0.195401	6.30708	2.04152	0.153056	0.673643
	ENSMUSG00000064262	0.376482	4.201	2.04042	0.153167	0.673643
	ENSMUSG00000068686	0.465387	3.74416	2.04005	0.153205	0.673643
	ENSMUSG00000022831	-0.446118	5.35869	2.03767	0.153445	0.674107
	ENSMUSG00000019055	-0.231397	6.21825	2.0352	0.153694	0.674595
	ENSMUSG00000006717	0.21341	6.13906	2.03257	0.15396	0.674595
	ENSMUSG00000036845	0.32447	4.69022	2.03257	0.15396	0.674595
	ENSMUSG00000097316	0.3713	4.0672	2.02626	0.154601	0.676226
	ENSMUSG00000018476	0.354332	6.42518	2.02625	0.154602	0.676226
	ENSMUSG00000030055	-0.26894	5.83182	2.01963	0.155277	0.678583
	ENSMUSG00000030612	0.281308	4.70959	2.01479	0.155773	0.68016
	ENSMUSG00000032249	0.269929	4.68263	2.00961	0.156305	0.68028
	ENSMUSG00000043131	-0.201245	8.12588	2.00792	0.156479	0.68028
	ENSMUSG00000027562	-0.71422	4.3217	2.00593	0.156685	0.68028
	ENSMUSG00000026535	-0.368223	8.56144	2.00571	0.156707	0.68028
	ENSMUSG00000055204	0.14796	8.26314	2.00424	0.15686	0.68028
	ENSMUSG00000027263	-0.254969	5.4344	2.00298	0.15699	0.68028
	ENSMUSG00000000301	-0.447047	4.16605	2.00205	0.157087	0.68028
	ENSMUSG00000072692	0.350667	4.60652	2.00113	0.157182	0.68028
	ENSMUSG00000027091	0.182743	6.37393	1.99983	0.157317	0.68028
	ENSMUSG00000020088	-0.183982	9.34556	1.99967	0.157333	0.68028
	ENSMUSG00000027935	-0.260196	5.09008	1.99963	0.157337	0.68028
	ENSMUSG00000032309	0.206005	7.52785	1.9983	0.157476	0.68028
	ENSMUSG00000011256	-0.329467	6.77331	1.99743	0.157567	0.68028
	ENSMUSG00000050229	0.179889	6.41732	1.99508	0.157811	0.680342
	ENSMUSG00000087153	0.406284	3.69053	1.99397	0.157926	0.680342
	ENSMUSG00000028467	-0.332912	4.10665	1.99337	0.157989	0.680342
	ENSMUSG00000039735	-0.389529	6.441	1.98492	0.158873	0.682614
	ENSMUSG00000069520	-0.162288	7.57688	1.98465	0.158901	0.682614
	ENSMUSG00000020130	0.171902	7.43125	1.98443	0.158925	0.682614
	ENSMUSG00000023150	0.386268	9.21933	1.97894	0.159502	0.684055
	ENSMUSG00000070427	0.336133	4.56712	1.97864	0.159534	0.684055
	ENSMUSG00000027679	-0.292908	5.12678	1.97002	0.160445	0.687376
	ENSMUSG00000027677	0.198821	7.06832	1.96835	0.160623	0.687419
	ENSMUSG00000031583	0.27139	5.26437	1.96735	0.16073	0.687419
	ENSMUSG00000028402	0.154042	9.38784	1.9645	0.161033	0.688129
	ENSMUSG00000074405	0.391527	3.9345	1.96178	0.161323	0.688259
	ENSMUSG00000033282	0.468983	3.93658	1.96163	0.161339	0.688259
	ENSMUSG00000034801	0.234255	5.96763	1.95963	0.161553	0.688585
	ENSMUSG00000023959	0.320162	6.97394	1.95482	0.162068	0.688956
	ENSMUSG00000025369	0.164814	9.15107	1.95454	0.162099	0.688956
	ENSMUSG00000097258	-0.391385	4.34048	1.9533	0.162231	0.688956
	ENSMUSG00000004085	0.253243	7.884	1.95053	0.162529	0.688956
	ENSMUSG00000063802	0.315893	4.85746	1.95006	0.16258	0.688956
	ENSMUSG00000020120	-0.544948	5.53108	1.94829	0.162771	0.688956
	ENSMUSG00000059883	-0.277483	5.64996	1.94638	0.162977	0.688956
	ENSMUSG00000020741	0.321107	8.85475	1.94577	0.163043	0.688956
	ENSMUSG00000033629	-0.271279	4.91787	1.94486	0.163141	0.688956
	ENSMUSG00000018286	-0.167898	8.74834	1.94312	0.16333	0.688956
	ENSMUSG00000033715	-0.632384	6.2484	1.94273	0.163372	0.688956
	ENSMUSG00000068923	0.328951	4.90798	1.94247	0.163401	0.688956
	ENSMUSG00000022255	-0.159142	7.12136	1.93898	0.163779	0.688956
	ENSMUSG00000094320	0.434816	3.91495	1.93843	0.163839	0.688956
	ENSMUSG00000026404	0.291653	4.43498	1.9354	0.164169	0.688956
	ENSMUSG00000011658	0.28247	5.25738	1.934	0.164321	0.688956
	ENSMUSG00000049106	-0.218195	6.36033	1.93334	0.164394	0.688956
	ENSMUSG00000031974	-0.295173	5.31609	1.93301	0.164429	0.688956
	ENSMUSG00000032413	0.212635	8.09638	1.93267	0.164467	0.688956
	ENSMUSG00000001751	-0.290921	5.29055	1.93165	0.164578	0.688956
	ENSMUSG00000041992	0.278829	6.1061	1.93164	0.164579	0.688956
	ENSMUSG00000028383	0.245089	8.19342	1.92858	0.164914	0.688956
	ENSMUSG00000019302	-0.259361	7.3848	1.92776	0.165004	0.688956
	ENSMUSG00000038365	0.194153	6.33491	1.92536	0.165267	0.688956
	ENSMUSG00000068015	-0.417166	3.69403	1.92529	0.165274	0.688956
	ENSMUSG00000024013	-0.256287	6.18565	1.9239	0.165427	0.688956
	ENSMUSG00000027752	-0.407192	3.67216	1.9235	0.165472	0.688956
	ENSMUSG00000018697	0.228054	5.8899	1.92282	0.165546	0.688956
	ENSMUSG00000023008	-0.258604	5.74184	1.92113	0.165732	0.688956
	ENSMUSG00000027163	-0.197464	6.79319	1.92045	0.165807	0.688956
	ENSMUSG00000001518	0.341108	4.36644	1.91785	0.166094	0.688956
	ENSMUSG00000083076	0.436666	10.8384	1.91648	0.166245	0.688956
	ENSMUSG00000024941	0.210801	7.23555	1.91581	0.166319	0.688956
	ENSMUSG00000074785	-0.355035	6.19549	1.91499	0.16641	0.688956
	ENSMUSG00000030751	-0.192161	8.71641	1.91439	0.166477	0.688956
	ENSMUSG00000042743	0.213468	5.58177	1.91335	0.166592	0.688956
	ENSMUSG00000050705	0.5144	3.65554	1.91087	0.166867	0.689315
	ENSMUSG00000034591	-0.28856	5.71047	1.91008	0.166954	0.689315
	ENSMUSG00000033991	-0.171825	7.16872	1.90643	0.167361	0.690256
	ENSMUSG00000048732	-0.377961	4.32705	1.90491	0.167529	0.690256
	ENSMUSG00000043998	-0.249174	6.32978	1.90336	0.167703	0.690256
	ENSMUSG00000027004	-0.442332	3.98219	1.90309	0.167733	0.690256
	ENSMUSG00000025722	-0.369478	3.87374	1.89872	0.168222	0.691442
	ENSMUSG00000025453	0.224794	7.50045	1.89723	0.168389	0.691442
	ENSMUSG00000002763	0.375016	4.32934	1.89681	0.168436	0.691442
	ENSMUSG00000027219	-0.23037	7.41385	1.89296	0.168868	0.692547
	ENSMUSG00000032551	0.303986	5.34615	1.89196	0.168981	0.692547
	ENSMUSG00000038467	-0.176949	8.1579	1.8877	0.169462	0.693513
	ENSMUSG00000002881	-0.255112	6.17825	1.88418	0.16986	0.693513
	ENSMUSG00000035929	-0.293902	9.34305	1.88354	0.169933	0.693513
	ENSMUSG00000027784	0.387312	5.71087	1.88081	0.170242	0.693513
	ENSMUSG00000000957	-0.467249	8.15835	1.88078	0.170246	0.693513
	ENSMUSG00000022623	0.424453	4.09767	1.87928	0.170416	0.693513
	ENSMUSG00000014444	0.216401	9.75803	1.87739	0.170631	0.693513
	ENSMUSG00000028857	0.265372	5.03435	1.87523	0.170878	0.693513
	ENSMUSG00000031792	-0.237368	5.40001	1.87363	0.17106	0.693513
	ENSMUSG00000053684	0.262506	5.07817	1.87224	0.171219	0.693513
	ENSMUSG00000026116	0.498963	4.26804	1.87156	0.171296	0.693513
	ENSMUSG00000021147	-0.190134	7.0357	1.87105	0.171354	0.693513
	ENSMUSG00000040044	0.160903	7.07233	1.87007	0.171467	0.693513
	ENSMUSG00000020300	-0.199826	6.37885	1.86974	0.171505	0.693513
	ENSMUSG00000030533	0.191842	6.76667	1.86936	0.171549	0.693513
	ENSMUSG00000031445	-0.725302	4.02928	1.86863	0.171632	0.693513
	ENSMUSG00000034656	-0.300171	5.51018	1.86678	0.171845	0.693513
	ENSMUSG00000097275	0.398257	4.23328	1.86528	0.172017	0.693513
	ENSMUSG00000087413	0.510187	3.86694	1.86472	0.172081	0.693513
	ENSMUSG00000036019	0.355898	5.58204	1.86449	0.172108	0.693513
	ENSMUSG00000004947	0.234142	7.51201	1.86434	0.172125	0.693513
	ENSMUSG00000067288	-0.256976	6.41266	1.86224	0.172367	0.693644
	ENSMUSG00000037110	0.29794	6.99386	1.8606	0.172556	0.693644
	ENSMUSG00000003549	0.252618	5.45056	1.86045	0.172573	0.693644
	ENSMUSG00000095990	0.39708	3.82185	1.85754	0.172909	0.693684
	ENSMUSG00000038312	-0.216564	5.93679	1.85734	0.172932	0.693684
	ENSMUSG00000051346	0.271275	5.40552	1.85549	0.173147	0.693684
	ENSMUSG00000020463	0.225923	5.29488	1.85512	0.173189	0.693684
	ENSMUSG00000058672	-0.358705	7.26166	1.85432	0.173282	0.693684
	ENSMUSG00000027070	0.885959	6.89563	1.85304	0.17343	0.693684
	ENSMUSG00000052565	-0.359827	7.31575	1.84924	0.173872	0.693684
	ENSMUSG00000027187	0.252319	11.0136	1.84806	0.174009	0.693684
	ENSMUSG00000039929	0.373702	3.72066	1.84621	0.174224	0.693684
	ENSMUSG00000028479	0.279475	5.20819	1.8447	0.174401	0.693684
	ENSMUSG00000033430	0.329871	4.64049	1.84433	0.174444	0.693684
	ENSMUSG00000024940	0.243569	8.83679	1.84368	0.17452	0.693684
	ENSMUSG00000081043	0.542357	10.2524	1.84287	0.174615	0.693684
	ENSMUSG00000028973	0.294677	7.29449	1.84057	0.174884	0.693684
	ENSMUSG00000052534	0.314274	6.66916	1.83985	0.174969	0.693684
	ENSMUSG00000059796	-0.192975	9.98057	1.83812	0.175171	0.693684
	ENSMUSG00000032342	0.312465	4.68118	1.83753	0.175241	0.693684
	ENSMUSG00000037493	0.340803	5.67202	1.83646	0.175366	0.693684
	ENSMUSG00000027167	0.26032	5.12503	1.83599	0.175421	0.693684
	ENSMUSG00000025555	0.249663	6.53157	1.83582	0.175441	0.693684
	ENSMUSG00000022708	0.244096	9.08115	1.83539	0.175492	0.693684
	ENSMUSG00000020376	-0.194019	6.74471	1.83101	0.176008	0.694038
	ENSMUSG00000024317	0.196106	6.31722	1.83047	0.176072	0.694038
	ENSMUSG00000092223	-0.220864	6.2919	1.83036	0.176085	0.694038
	ENSMUSG00000062078	0.239664	7.15091	1.82993	0.176136	0.694038
	ENSMUSG00000038677	0.56934	4.31486	1.82613	0.176585	0.695075
	ENSMUSG00000027750	-0.429457	10.3624	1.82536	0.176676	0.695075
	ENSMUSG00000023861	0.319099	4.85891	1.82249	0.177017	0.695798
	ENSMUSG00000034297	0.218553	5.60266	1.82147	0.177138	0.695798
	ENSMUSG00000036992	0.373855	4.15522	1.81925	0.177402	0.696246
	ENSMUSG00000027782	0.156096	7.82191	1.81818	0.17753	0.696246
	ENSMUSG00000060032	0.233704	8.5995	1.81628	0.177756	0.69635
	ENSMUSG00000027204	-0.359375	7.88806	1.81344	0.178096	0.69635
	ENSMUSG00000022371	0.373143	5.68735	1.81272	0.178182	0.69635
	ENSMUSG00000041219	-0.378532	5.45827	1.81228	0.178235	0.69635
	ENSMUSG00000046410	-0.456541	4.21263	1.81214	0.178252	0.69635
	ENSMUSG00000013593	0.21487	9.7169	1.80971	0.178544	0.696911
	ENSMUSG00000004500	-0.26453	4.41063	1.80862	0.178674	0.696911
	ENSMUSG00000032050	0.158815	8.75561	1.80733	0.178828	0.696971
	ENSMUSG00000061479	0.313925	4.71581	1.80611	0.178976	0.697004
	ENSMUSG00000062526	0.340326	4.13971	1.80248	0.179413	0.697948
	ENSMUSG00000032508	-0.189013	6.92757	1.80058	0.179642	0.697948
	ENSMUSG00000078584	0.257482	5.05433	1.7998	0.179736	0.697948
	ENSMUSG00000022205	-0.237559	8.93167	1.79948	0.179776	0.697948
	ENSMUSG00000034254	0.224779	7.60432	1.79779	0.17998	0.698101
	ENSMUSG00000030126	-0.232865	5.22155	1.79685	0.180094	0.698101
	ENSMUSG00000040084	-0.373092	5.19196	1.7909	0.180816	0.700262
	ENSMUSG00000029038	-0.179646	6.46126	1.78922	0.181021	0.700262
	ENSMUSG00000030546	0.31694	13.2817	1.78666	0.181333	0.700262
	ENSMUSG00000091705	-0.273635	9.00754	1.78637	0.181369	0.700262
	ENSMUSG00000024065	-0.386222	5.99476	1.78578	0.181441	0.700262
	ENSMUSG00000031858	0.454284	3.61636	1.78538	0.18149	0.700262
	ENSMUSG00000002107	0.19228	8.22968	1.78316	0.181761	0.700407
	ENSMUSG00000018765	0.205998	7.0636	1.78278	0.181808	0.700407
	ENSMUSG00000038633	-0.260625	9.40083	1.78102	0.182025	0.700704
	ENSMUSG00000001741	0.286552	5.00407	1.77887	0.182288	0.70118
	ENSMUSG00000097290	0.302588	5.08177	1.77669	0.182556	0.701608
	ENSMUSG00000032192	0.255468	6.31993	1.77569	0.18268	0.701608
	ENSMUSG00000019326	0.274087	11.886	1.7715	0.183196	0.703053
	ENSMUSG00000019944	0.311836	6.21383	1.76698	0.183757	0.703079
	ENSMUSG00000062381	0.178834	7.35845	1.76675	0.183785	0.703079
	ENSMUSG00000016495	-0.163827	6.99184	1.76439	0.184078	0.703079
	ENSMUSG00000022940	0.212708	6.96994	1.76214	0.184358	0.703079
	ENSMUSG00000025591	0.388294	3.67718	1.76041	0.184574	0.703079
	ENSMUSG00000018736	-0.154429	7.81174	1.76022	0.184598	0.703079
	ENSMUSG00000033272	0.235616	6.82544	1.75989	0.184638	0.703079
	ENSMUSG00000033557	0.242895	6.00115	1.75973	0.184658	0.703079
	ENSMUSG00000024319	0.157948	8.56577	1.75846	0.184817	0.703079
	ENSMUSG00000035944	0.280915	6.37277	1.75825	0.184843	0.703079
	ENSMUSG00000043259	0.361217	4.24337	1.75795	0.184881	0.703079
	ENSMUSG00000045100	0.299246	4.82804	1.75789	0.184888	0.703079
	ENSMUSG00000026630	-0.463455	3.84997	1.75423	0.185346	0.704287
	ENSMUSG00000042010	0.591636	8.3772	1.75192	0.185635	0.704851
	ENSMUSG00000027671	-0.200436	5.92228	1.75002	0.185874	0.705223
	ENSMUSG00000039183	-0.190504	5.62518	1.74545	0.18645	0.705692
	ENSMUSG00000033016	-0.279821	4.21252	1.74482	0.186529	0.705692
	ENSMUSG00000020608	-0.257381	5.20755	1.74396	0.186638	0.705692
	ENSMUSG00000024926	0.346616	4.50279	1.74315	0.186741	0.705692
	ENSMUSG00000037773	-0.315715	4.91327	1.74264	0.186805	0.705692
	ENSMUSG00000024818	-0.392526	4.73636	1.74224	0.186856	0.705692
	ENSMUSG00000086291	-0.372629	4.87347	1.74086	0.18703	0.705692
	ENSMUSG00000027305	0.18232	6.70689	1.74006	0.187131	0.705692
	ENSMUSG00000035093	-0.133958	7.78822	1.739	0.187266	0.705692
	ENSMUSG00000020063	0.230975	5.26149	1.73764	0.187438	0.705739
	ENSMUSG00000035692	-0.648871	3.89207	1.73668	0.18756	0.705739
	ENSMUSG00000032462	0.274249	6.52693	1.73443	0.187846	0.705988
	ENSMUSG00000038600	0.62503	4.30715	1.73394	0.187908	0.705988
	ENSMUSG00000029725	-0.28995	4.73405	1.73056	0.188339	0.706425
	ENSMUSG00000032561	-0.958213	4.13205	1.73013	0.188394	0.706425
	ENSMUSG00000026170	0.250961	7.03181	1.72971	0.188448	0.706425
	ENSMUSG00000046062	0.262926	5.91341	1.7266	0.188845	0.707385
	ENSMUSG00000021666	-0.334862	3.76984	1.72543	0.188995	0.707418
	ENSMUSG00000007891	-0.327451	12.3272	1.72113	0.189548	0.708844
	ENSMUSG00000005973	0.306025	6.5424	1.71961	0.189744	0.708844
	ENSMUSG00000037259	0.463536	4.24661	1.71849	0.189887	0.708844
	ENSMUSG00000071847	0.335455	7.68207	1.71771	0.189988	0.708844
	ENSMUSG00000051065	-0.344465	3.90161	1.71531	0.190298	0.708844
	ENSMUSG00000024414	-0.19044	6.76206	1.71517	0.190317	0.708844
	ENSMUSG00000040596	0.245189	5.21435	1.71324	0.190566	0.708844
	ENSMUSG00000032667	-0.185474	8.66263	1.71318	0.190574	0.708844
	ENSMUSG00000056121	0.1983	6.66582	1.71259	0.19065	0.708844
	ENSMUSG00000022803	0.457908	3.59419	1.70954	0.191045	0.709488
	ENSMUSG00000029658	0.476469	3.80069	1.70907	0.191106	0.709488
	ENSMUSG00000026305	-0.192996	7.79921	1.70672	0.191411	0.710093
	ENSMUSG00000039354	-0.281184	4.43341	1.70539	0.191584	0.710209
	ENSMUSG00000024063	-0.427376	3.55415	1.70274	0.19193	0.710966
	ENSMUSG00000033379	-0.188462	8.36058	1.69972	0.192324	0.711898
	ENSMUSG00000034620	0.138361	7.75469	1.69693	0.192689	0.712723
	ENSMUSG00000058761	0.181689	5.96331	1.69514	0.192925	0.712747
	ENSMUSG00000029833	0.255299	4.75267	1.69309	0.193194	0.712747
	ENSMUSG00000009549	-0.150491	8.46567	1.69191	0.19335	0.712747
	ENSMUSG00000027076	-0.232744	6.507	1.68967	0.193645	0.712747
	ENSMUSG00000066026	0.17205	9.46556	1.68944	0.193675	0.712747
	ENSMUSG00000032666	-0.218364	6.66452	1.68922	0.193703	0.712747
	ENSMUSG00000022389	0.501703	7.60838	1.68922	0.193704	0.712747
	ENSMUSG00000002871	-0.197781	5.94253	1.68823	0.193834	0.712747
	ENSMUSG00000027624	0.242039	9.25561	1.68485	0.194281	0.713757
	ENSMUSG00000031979	0.186921	7.34752	1.684	0.194394	0.713757
	ENSMUSG00000045917	-0.300156	5.29553	1.6799	0.194938	0.714039
	ENSMUSG00000081833	-0.462519	3.89131	1.67707	0.195315	0.714039
	ENSMUSG00000034187	-0.224109	5.28811	1.67585	0.195477	0.714039
	ENSMUSG00000000340	0.345941	6.4393	1.6757	0.195497	0.714039
	ENSMUSG00000061482	-0.199681	9.02219	1.67546	0.195529	0.714039
	ENSMUSG00000022906	-0.176579	7.88556	1.67541	0.195535	0.714039
	ENSMUSG00000086825	-0.393846	5.34378	1.6745	0.195657	0.714039
	ENSMUSG00000058690	0.304421	5.15669	1.67314	0.195838	0.714039
	ENSMUSG00000020205	0.378577	3.90128	1.67282	0.195882	0.714039
	ENSMUSG00000022426	0.436705	3.61041	1.6727	0.195897	0.714039
	ENSMUSG00000018501	0.257567	5.71193	1.6711	0.196111	0.714301
	ENSMUSG00000046311	-0.26726	6.05346	1.66911	0.196378	0.714752
	ENSMUSG00000006362	0.253333	5.27637	1.66605	0.196789	0.715729
	ENSMUSG00000021094	0.29944	6.95303	1.66312	0.197183	0.71664
	ENSMUSG00000027508	0.290212	4.34519	1.65918	0.197714	0.717868
	ENSMUSG00000029389	0.252742	5.13755	1.65849	0.197807	0.717868
	ENSMUSG00000028194	0.340806	7.04662	1.65559	0.1982	0.718773
	ENSMUSG00000032911	0.529848	3.83953	1.65238	0.198635	0.719087
	ENSMUSG00000020777	0.209475	9.80363	1.65212	0.19867	0.719087
	ENSMUSG00000001687	0.152611	7.86155	1.65141	0.198767	0.719087
	ENSMUSG00000027133	-0.215348	6.8082	1.65006	0.198951	0.719087
	ENSMUSG00000031790	0.356995	5.01811	1.64966	0.199005	0.719087
	ENSMUSG00000036986	0.248629	5.69191	1.64557	0.199563	0.719689
	ENSMUSG00000017737	0.645081	4.30298	1.6448	0.199668	0.719689
	ENSMUSG00000021223	0.311622	4.69213	1.64326	0.199878	0.719689
	ENSMUSG00000021676	-0.331686	6.10564	1.64323	0.199883	0.719689
	ENSMUSG00000043881	0.368282	3.90378	1.64233	0.200006	0.719689
	ENSMUSG00000026869	-0.1868	6.68602	1.64039	0.200271	0.719689
	ENSMUSG00000027984	0.228743	9.16343	1.64015	0.200305	0.719689
	ENSMUSG00000009739	0.219396	6.01117	1.63935	0.200414	0.719689
	ENSMUSG00000033222	-0.189179	5.94405	1.63899	0.200464	0.719689
	ENSMUSG00000031925	0.362046	3.71525	1.63549	0.200945	0.719831
	ENSMUSG00000040562	0.346043	7.87488	1.63463	0.201063	0.719831
	ENSMUSG00000022641	0.275227	5.66179	1.63308	0.201278	0.719831
	ENSMUSG00000060261	0.157811	7.7649	1.63124	0.201532	0.719831
	ENSMUSG00000021185	0.217035	6.99348	1.63112	0.201548	0.719831
	ENSMUSG00000078429	0.176489	8.6383	1.63055	0.201627	0.719831
	ENSMUSG00000025102	0.249269	5.07171	1.62939	0.201788	0.719831
	ENSMUSG00000023960	0.222838	6.07602	1.62738	0.202065	0.719831
	ENSMUSG00000020423	0.497869	5.59435	1.62715	0.202098	0.719831
	ENSMUSG00000044072	-0.304381	4.79958	1.62503	0.202392	0.719831
	ENSMUSG00000049969	-0.142717	7.85333	1.62495	0.202403	0.719831
	ENSMUSG00000054226	0.226172	5.43355	1.62473	0.202434	0.719831
	ENSMUSG00000043991	0.180323	6.79311	1.62402	0.202532	0.719831
	ENSMUSG00000062563	0.546245	3.84287	1.62341	0.202617	0.719831
	ENSMUSG00000062232	0.242834	5.73895	1.62301	0.202673	0.719831
	ENSMUSG00000020409	0.186118	6.98349	1.62207	0.202804	0.719831
	ENSMUSG00000030022	0.223812	8.08752	1.62034	0.203045	0.720176
	ENSMUSG00000025076	0.214694	5.80065	1.61772	0.20341	0.72096
	ENSMUSG00000004460	-0.21753	7.99207	1.61376	0.203964	0.722414
	ENSMUSG00000044864	-0.148507	7.0637	1.61266	0.204118	0.722447
	ENSMUSG00000001025	-0.290004	9.32256	1.61039	0.204436	0.723064
	ENSMUSG00000024725	-0.228	7.67194	1.60473	0.205235	0.723911
	ENSMUSG00000015749	0.190705	6.0695	1.60404	0.205332	0.723911
	ENSMUSG00000029998	-0.179984	9.98433	1.60382	0.205362	0.723911
	ENSMUSG00000086003	0.329687	4.57414	1.60303	0.205474	0.723911
	ENSMUSG00000033499	-0.144143	8.29286	1.60257	0.20554	0.723911
	ENSMUSG00000092243	-0.237564	6.2215	1.60254	0.205543	0.723911
	ENSMUSG00000027463	0.469332	4.5958	1.60139	0.205706	0.723974
	ENSMUSG00000021732	0.227107	7.50965	1.59969	0.205947	0.724313
	ENSMUSG00000030149	-0.393821	4.06247	1.59167	0.207087	0.726856
	ENSMUSG00000074649	0.21142	6.86439	1.59147	0.207116	0.726856
	ENSMUSG00000041328	0.162486	7.7904	1.59078	0.207215	0.726856
	ENSMUSG00000024556	-0.207046	5.80546	1.59053	0.20725	0.726856
	ENSMUSG00000040312	0.279003	4.32122	1.5882	0.207584	0.727517
	ENSMUSG00000025357	0.222823	5.86255	1.58646	0.207832	0.727697
	ENSMUSG00000020380	0.209262	5.81294	1.58281	0.208357	0.727697
	ENSMUSG00000034007	0.219618	6.15375	1.58241	0.208414	0.727697
	ENSMUSG00000042460	-0.279098	6.84876	1.58236	0.208421	0.727697
	ENSMUSG00000032407	0.157647	7.71783	1.58079	0.208646	0.727697
	ENSMUSG00000033983	-0.201017	5.34034	1.58007	0.208751	0.727697
	ENSMUSG00000024610	-0.28573	10.4102	1.57906	0.208896	0.727697
	ENSMUSG00000049755	-0.438719	3.52805	1.57894	0.208913	0.727697
	ENSMUSG00000003355	-0.345257	3.91564	1.57874	0.208943	0.727697
	ENSMUSG00000042190	0.285104	7.45835	1.57735	0.209143	0.727717
	ENSMUSG00000038400	0.402538	8.709	1.57668	0.209239	0.727717
	ENSMUSG00000041797	-0.311923	5.83786	1.57502	0.209479	0.728044
	ENSMUSG00000080316	-0.352369	5.25773	1.571	0.210062	0.728546
	ENSMUSG00000037885	0.20654	6.15202	1.57034	0.210158	0.728546
	ENSMUSG00000017667	0.379684	3.74666	1.56919	0.210325	0.728546
	ENSMUSG00000034641	-0.530046	4.42668	1.56876	0.210388	0.728546
	ENSMUSG00000042485	0.671749	4.13663	1.56567	0.210837	0.728546
	ENSMUSG00000053886	0.350866	4.71746	1.56508	0.210923	0.728546
	ENSMUSG00000087070	0.416801	3.91104	1.56498	0.210938	0.728546
	ENSMUSG00000038888	-0.348069	4.42995	1.56462	0.210989	0.728546
	ENSMUSG00000026200	-0.35974	3.61218	1.56194	0.211382	0.728546
	ENSMUSG00000022973	-0.288451	5.0028	1.5615	0.211446	0.728546
	ENSMUSG00000098098	0.617055	5.40326	1.56055	0.211584	0.728546
	ENSMUSG00000066687	0.287182	5.63924	1.55979	0.211696	0.728546
	ENSMUSG00000049866	-0.506872	5.33052	1.55927	0.211772	0.728546
	ENSMUSG00000024403	-0.325291	3.99341	1.5591	0.211798	0.728546
	ENSMUSG00000036879	0.246446	5.22244	1.55842	0.211897	0.728546
	ENSMUSG00000028053	0.153679	7.1144	1.55763	0.212012	0.728546
	ENSMUSG00000091449	0.332888	3.88574	1.55706	0.212096	0.728546
	ENSMUSG00000015932	0.304821	6.01215	1.55506	0.21239	0.729054
	ENSMUSG00000040253	0.16491	8.33684	1.55235	0.212789	0.72989
	ENSMUSG00000061689	0.1829	6.46875	1.55115	0.212966	0.72989
	ENSMUSG00000050002	-0.272056	4.30692	1.55044	0.21307	0.72989
	ENSMUSG00000022987	0.352227	4.08664	1.54768	0.213479	0.730022
	ENSMUSG00000079277	0.524871	3.86884	1.54761	0.213488	0.730022
	ENSMUSG00000060636	-0.168288	9.119	1.54467	0.213924	0.730022
	ENSMUSG00000027254	-0.290199	7.48078	1.54402	0.214021	0.730022
	ENSMUSG00000023087	-0.358036	5.82456	1.54369	0.21407	0.730022
	ENSMUSG00000026222	-0.198443	7.16742	1.54342	0.21411	0.730022
	ENSMUSG00000034449	0.407698	3.68333	1.54329	0.214129	0.730022
	ENSMUSG00000031652	0.245308	4.83508	1.54175	0.214358	0.730129
	ENSMUSG00000024068	-0.131065	7.33859	1.53957	0.214682	0.730129
	ENSMUSG00000047534	-0.51875	3.7905	1.53923	0.214732	0.730129
	ENSMUSG00000035671	-0.247937	6.34581	1.53915	0.214744	0.730129
	ENSMUSG00000027394	-0.184663	6.01578	1.53751	0.214988	0.730464
	ENSMUSG00000001555	-0.236916	5.43218	1.53567	0.215264	0.730905
	ENSMUSG00000037531	0.260026	4.6176	1.53106	0.215954	0.731091
	ENSMUSG00000061315	0.412771	3.78902	1.531	0.215963	0.731091
	ENSMUSG00000046694	0.508427	4.91042	1.53072	0.216005	0.731091
	ENSMUSG00000050931	0.403115	4.14118	1.52974	0.216152	0.731091
	ENSMUSG00000030341	0.181894	7.08836	1.52835	0.21636	0.731091
	ENSMUSG00000036594	-0.321045	11.7472	1.52801	0.216411	0.731091
	ENSMUSG00000031955	0.28	6.30149	1.52773	0.216453	0.731091
	ENSMUSG00000002064	-0.245706	5.18694	1.52502	0.216861	0.731091
	ENSMUSG00000032254	-0.371412	3.93431	1.52403	0.217011	0.731091
	ENSMUSG00000012819	0.251008	5.32819	1.52216	0.217293	0.731091
	ENSMUSG00000026641	-0.179083	6.2168	1.52184	0.217341	0.731091
	ENSMUSG00000042216	0.443217	3.74362	1.52147	0.217397	0.731091
	ENSMUSG00000031709	-0.336019	6.80917	1.52087	0.217487	0.731091
	ENSMUSG00000032766	-0.302073	4.09037	1.52075	0.217506	0.731091
	ENSMUSG00000029761	0.441338	7.2651	1.51854	0.21784	0.731091
	ENSMUSG00000038583	0.566229	3.83954	1.5174	0.218013	0.731091
	ENSMUSG00000024217	0.30364	3.99356	1.51699	0.218076	0.731091
	ENSMUSG00000053768	0.227538	5.54221	1.51663	0.218129	0.731091
	ENSMUSG00000033623	-0.326631	4.23357	1.5156	0.218286	0.731091
	ENSMUSG00000073940	-0.695816	7.48872	1.51508	0.218365	0.731091
	ENSMUSG00000033632	0.3275	4.45072	1.51496	0.218384	0.731091
	ENSMUSG00000027763	0.396796	6.18541	1.51335	0.218629	0.731157
	ENSMUSG00000034573	0.394451	3.99831	1.51291	0.218696	0.731157
	ENSMUSG00000019923	0.167102	7.22793	1.51028	0.219097	0.731663
	ENSMUSG00000054793	0.42634	3.96561	1.51	0.21914	0.731663
	ENSMUSG00000035726	-0.175033	6.06079	1.50863	0.219349	0.731874
	ENSMUSG00000001911	0.30187	4.03873	1.50562	0.219808	0.732912
	ENSMUSG00000026377	0.241187	4.48787	1.50468	0.219953	0.732912
	ENSMUSG00000020653	0.161201	7.07556	1.50288	0.220229	0.733345
	ENSMUSG00000041645	0.205361	6.10964	1.50162	0.220423	0.733503
	ENSMUSG00000038172	-0.190326	5.71488	1.49891	0.220839	0.7344
	ENSMUSG00000027130	-0.210572	5.89471	1.49606	0.221278	0.735371
	ENSMUSG00000020456	0.245874	7.11368	1.49338	0.221693	0.736101
	ENSMUSG00000038695	-0.214157	5.76199	1.49244	0.221838	0.736101
	ENSMUSG00000020850	0.219781	6.05781	1.49179	0.221939	0.736101
	ENSMUSG00000030621	0.441184	3.73492	1.48563	0.222896	0.737921
	ENSMUSG00000033233	0.582642	4.2529	1.4854	0.222932	0.737921
	ENSMUSG00000040061	-0.331861	4.92665	1.48394	0.22316	0.737921
	ENSMUSG00000042605	0.27967	4.19184	1.48285	0.22333	0.737921
	ENSMUSG00000024587	-0.19096	7.06829	1.48186	0.223484	0.737921
	ENSMUSG00000041268	0.187788	7.40918	1.48096	0.223625	0.737921
	ENSMUSG00000062234	-0.150924	6.67698	1.48073	0.22366	0.737921
	ENSMUSG00000032515	0.446697	5.58273	1.47937	0.223873	0.737921
	ENSMUSG00000030978	-0.159115	7.09635	1.47801	0.224086	0.737921
	ENSMUSG00000000628	0.380492	8.67434	1.47612	0.224382	0.737921
	ENSMUSG00000061740	0.226437	5.01003	1.47606	0.224392	0.737921
	ENSMUSG00000024404	-0.137417	8.08057	1.4753	0.224512	0.737921
	ENSMUSG00000044968	0.194318	6.89962	1.47457	0.224626	0.737921
	ENSMUSG00000033863	0.202417	8.79804	1.47377	0.224752	0.737921
	ENSMUSG00000020413	0.322356	3.81999	1.47319	0.224844	0.737921
	ENSMUSG00000015165	0.125921	8.29166	1.47318	0.224845	0.737921
	ENSMUSG00000029416	-0.199526	6.75054	1.47152	0.225107	0.738154
	ENSMUSG00000028268	0.157247	7.68932	1.46978	0.225381	0.738154
	ENSMUSG00000035367	-0.221838	4.67082	1.46781	0.225692	0.738154
	ENSMUSG00000037295	-0.176436	6.76659	1.46724	0.225781	0.738154
	ENSMUSG00000021767	0.221815	5.72396	1.46496	0.226143	0.738154
	ENSMUSG00000036560	-0.337001	4.72404	1.46406	0.226286	0.738154
	ENSMUSG00000036322	-0.322439	10.7614	1.4637	0.226342	0.738154
	ENSMUSG00000027610	-0.171517	6.82202	1.46366	0.226349	0.738154
	ENSMUSG00000026687	0.272241	5.18008	1.46364	0.226352	0.738154
	ENSMUSG00000026511	-0.142081	7.45336	1.4634	0.22639	0.738154
	ENSMUSG00000026664	0.241165	6.17944	1.46072	0.226816	0.738602
	ENSMUSG00000022365	0.193994	6.60084	1.46068	0.226822	0.738602
	ENSMUSG00000028700	0.17416	6.07346	1.45767	0.227301	0.73933
	ENSMUSG00000031483	-0.138013	7.41539	1.45742	0.227341	0.73933
	ENSMUSG00000024524	-0.223508	4.43737	1.45561	0.227631	0.739792
	ENSMUSG00000052298	-0.245396	5.624	1.45377	0.227924	0.740266
	ENSMUSG00000023845	0.148274	8.22685	1.45103	0.228363	0.74121
	ENSMUSG00000013787	0.155178	8.38345	1.44795	0.228858	0.741582
	ENSMUSG00000040225	0.164031	7.59074	1.44654	0.229085	0.741582
	ENSMUSG00000028798	-0.153057	7.63322	1.44542	0.229264	0.741582
	ENSMUSG00000025809	-0.139247	9.33785	1.44516	0.229306	0.741582
	ENSMUSG00000026709	0.179221	5.67192	1.4446	0.229397	0.741582
	ENSMUSG00000032487	1.14095	7.59701	1.4433	0.229607	0.741582
	ENSMUSG00000037089	-0.223175	5.41765	1.44307	0.229643	0.741582
	ENSMUSG00000033943	0.170288	8.91213	1.44295	0.229662	0.741582
	ENSMUSG00000023947	-0.393488	3.94745	1.4403	0.230091	0.742102
	ENSMUSG00000028664	0.252225	5.66634	1.4394	0.230237	0.742102
	ENSMUSG00000053687	-0.598007	4.21854	1.43921	0.230268	0.742102
	ENSMUSG00000031668	0.176823	6.05639	1.43823	0.230426	0.742134
	ENSMUSG00000059552	-0.230637	5.13062	1.43728	0.230581	0.742156
	ENSMUSG00000028848	-0.206156	5.8577	1.43525	0.23091	0.742395
	ENSMUSG00000018770	-0.286028	3.92088	1.43243	0.231368	0.742395
	ENSMUSG00000002814	0.348722	4.23597	1.432	0.231438	0.742395
	ENSMUSG00000069792	-0.34815	5.07849	1.43109	0.231587	0.742395
	ENSMUSG00000015354	-0.315139	9.89012	1.4291	0.231912	0.742395
	ENSMUSG00000090272	-0.2156	6.56454	1.42877	0.231965	0.742395
	ENSMUSG00000060550	-0.258871	5.46983	1.42643	0.232348	0.742395
	ENSMUSG00000020532	0.551629	10.2751	1.42603	0.232413	0.742395
	ENSMUSG00000044468	-0.420392	5.52141	1.42491	0.232597	0.742395
	ENSMUSG00000036435	-0.314725	4.06034	1.42361	0.23281	0.742395
	ENSMUSG00000021589	-0.262274	5.30815	1.42318	0.23288	0.742395
	ENSMUSG00000032547	-0.168877	6.5312	1.42313	0.232889	0.742395
	ENSMUSG00000022228	0.201611	5.58095	1.42298	0.232914	0.742395
	ENSMUSG00000024431	0.18099	6.45218	1.42281	0.232941	0.742395
	ENSMUSG00000063450	0.261778	8.71528	1.42252	0.232989	0.742395
	ENSMUSG00000058756	0.3512	4.98411	1.42086	0.233262	0.742395
	ENSMUSG00000047098	0.390855	4.06	1.419	0.233569	0.742395
	ENSMUSG00000040618	-0.273801	6.35907	1.41874	0.233611	0.742395
	ENSMUSG00000067106	-0.195178	8.18475	1.41871	0.233615	0.742395
	ENSMUSG00000000278	-0.259952	6.92759	1.41572	0.234109	0.742395
	ENSMUSG00000038880	0.26474	4.91487	1.41567	0.234117	0.742395
	ENSMUSG00000025092	0.258527	6.50676	1.41567	0.234118	0.742395
	ENSMUSG00000047832	-0.217462	5.72025	1.41466	0.234284	0.742395
	ENSMUSG00000007827	0.305534	5.37193	1.4145	0.234311	0.742395
	ENSMUSG00000027166	-0.3019	3.9351	1.4142	0.234361	0.742395
	ENSMUSG00000015542	0.167582	6.43065	1.41122	0.234854	0.742526
	ENSMUSG00000027639	-0.195604	8.15129	1.41117	0.234863	0.742526
	ENSMUSG00000078502	-0.498949	4.40715	1.41034	0.235001	0.742526
	ENSMUSG00000021690	0.409964	7.06314	1.40661	0.235619	0.742526
	ENSMUSG00000045659	-0.374436	4.55512	1.40617	0.235693	0.742526
	ENSMUSG00000026698	-0.227122	4.98435	1.40546	0.235811	0.742526
	ENSMUSG00000087260	-0.15561	7.25719	1.40499	0.23589	0.742526
	ENSMUSG00000019647	0.304357	5.11021	1.40446	0.235979	0.742526
	ENSMUSG00000020152	-0.193369	9.30155	1.40426	0.236012	0.742526
	ENSMUSG00000002728	-0.178449	6.34877	1.40418	0.236026	0.742526
	ENSMUSG00000038351	0.232443	5.00723	1.40413	0.236033	0.742526
	ENSMUSG00000013033	0.299458	5.57092	1.39903	0.236886	0.743901
	ENSMUSG00000030747	0.683822	3.65854	1.39757	0.237131	0.743901
	ENSMUSG00000049103	-0.375467	9.66367	1.39735	0.237167	0.743901
	ENSMUSG00000024537	-0.327306	3.94951	1.39727	0.237181	0.743901
	ENSMUSG00000029695	-0.586541	5.46821	1.39708	0.237213	0.743901
	ENSMUSG00000031600	-0.24405	5.38647	1.39273	0.237945	0.744531
	ENSMUSG00000019437	0.290733	5.71824	1.3926	0.237966	0.744531
	ENSMUSG00000022358	0.677889	7.163	1.39246	0.23799	0.744531
	ENSMUSG00000073678	-0.281387	5.23879	1.3909	0.238253	0.744531
	ENSMUSG00000051978	-0.259478	4.57079	1.39075	0.238279	0.744531
	ENSMUSG00000040713	-0.234328	8.9703	1.39059	0.238306	0.744531
	ENSMUSG00000027641	-0.167981	6.28687	1.38859	0.238643	0.744693
	ENSMUSG00000025815	0.324533	4.72453	1.38751	0.238827	0.744693
	ENSMUSG00000028028	-0.21514	7.63392	1.38627	0.239036	0.744693
	ENSMUSG00000086679	0.311858	5.3366	1.3861	0.239064	0.744693
	ENSMUSG00000026659	-0.24637	5.03805	1.38514	0.239227	0.744693
	ENSMUSG00000073792	-0.303717	4.08799	1.38501	0.23925	0.744693
	ENSMUSG00000032434	-0.148993	8.09368	1.38273	0.239637	0.745436
	ENSMUSG00000055994	-0.299626	4.077	1.3809	0.239949	0.745941
	ENSMUSG00000097660	-0.317551	4.36964	1.37821	0.240406	0.746899
	ENSMUSG00000045039	0.200124	7.59592	1.37562	0.240849	0.747463
	ENSMUSG00000022812	0.131455	8.56081	1.3754	0.240886	0.747463
	ENSMUSG00000014177	-0.213303	6.02459	1.37262	0.241363	0.74767
	ENSMUSG00000051586	0.286691	6.07795	1.37037	0.241747	0.74767
	ENSMUSG00000041638	0.175242	8.25023	1.36977	0.241851	0.74767
	ENSMUSG00000044338	-0.275472	6.86991	1.3692	0.24195	0.74767
	ENSMUSG00000024472	-0.113588	8.41139	1.36798	0.24216	0.74767
	ENSMUSG00000078139	0.205736	5.40815	1.36685	0.242353	0.74767
	ENSMUSG00000062963	-0.148672	7.19333	1.36574	0.242545	0.74767
	ENSMUSG00000028563	-0.208624	5.31849	1.36561	0.242567	0.74767
	ENSMUSG00000026536	-0.28088	6.72481	1.36454	0.242752	0.74767
	ENSMUSG00000020017	-0.326531	8.30601	1.36452	0.242755	0.74767
	ENSMUSG00000006818	-0.2417	8.57901	1.36423	0.242807	0.74767
	ENSMUSG00000030246	0.202866	9.20392	1.36239	0.243124	0.74767
	ENSMUSG00000027082	0.254238	5.7328	1.36193	0.243203	0.74767
	ENSMUSG00000097080	-0.298746	3.79482	1.36105	0.243356	0.74767
	ENSMUSG00000021614	-0.496153	3.9306	1.36099	0.243367	0.74767
	ENSMUSG00000030337	0.298254	4.29078	1.36022	0.243499	0.74767
	ENSMUSG00000070565	-0.315873	4.19869	1.35918	0.24368	0.74767
	ENSMUSG00000029577	0.175465	7.23359	1.3586	0.24378	0.74767
	ENSMUSG00000073643	-0.173967	6.74412	1.3568	0.244093	0.74767
	ENSMUSG00000020755	-0.182668	5.06536	1.35669	0.244111	0.74767
	ENSMUSG00000037847	-0.257581	4.48207	1.35548	0.244322	0.74767
	ENSMUSG00000003134	-0.304753	4.69652	1.35504	0.244399	0.74767
	ENSMUSG00000019188	-0.145464	6.14861	1.35436	0.244517	0.74767
	ENSMUSG00000024359	0.204361	9.48563	1.35425	0.244536	0.74767
	ENSMUSG00000024384	0.179065	6.05106	1.35083	0.245134	0.748133
	ENSMUSG00000009079	-0.343642	3.64953	1.35049	0.245192	0.748133
	ENSMUSG00000026029	-0.162056	7.62437	1.35	0.245279	0.748133
	ENSMUSG00000022022	-0.209812	5.54438	1.34996	0.245285	0.748133
	ENSMUSG00000029427	0.208296	4.83682	1.34663	0.245867	0.749044
	ENSMUSG00000016087	-0.179558	6.58737	1.34449	0.246243	0.749044
	ENSMUSG00000028480	-0.243723	6.8656	1.34445	0.246251	0.749044
	ENSMUSG00000051331	0.654617	4.88623	1.344	0.24633	0.749044
	ENSMUSG00000049600	-0.358709	3.81794	1.34399	0.246331	0.749044
	ENSMUSG00000024043	0.241311	6.44842	1.34129	0.246807	0.749922
	ENSMUSG00000060509	-0.300059	4.41221	1.34065	0.24692	0.749922
	ENSMUSG00000029072	-0.353062	3.9062	1.33914	0.247186	0.750271
	ENSMUSG00000021728	-0.499347	6.74575	1.33773	0.247434	0.750271
	ENSMUSG00000044600	0.257511	5.23637	1.33745	0.247484	0.750271
	ENSMUSG00000024049	0.674848	5.67255	1.33519	0.247884	0.750971
	ENSMUSG00000032042	0.189722	6.08458	1.33445	0.248014	0.750971
	ENSMUSG00000044795	0.176919	6.19415	1.33286	0.248298	0.751374
	ENSMUSG00000037580	-0.314394	4.0732	1.33067	0.248686	0.752094
	ENSMUSG00000061119	-0.232534	6.96745	1.32626	0.249472	0.753173
	ENSMUSG00000031740	-0.325432	7.06429	1.326	0.249518	0.753173
	ENSMUSG00000037857	0.196193	6.71929	1.32523	0.249655	0.753173
	ENSMUSG00000066042	-0.252334	4.85487	1.32405	0.249867	0.753173
	ENSMUSG00000037461	-0.244631	4.87325	1.32376	0.249918	0.753173
	ENSMUSG00000013089	-0.16673	6.43961	1.32361	0.249945	0.753173
	ENSMUSG00000041297	0.364467	3.70674	1.32045	0.250511	0.75358
	ENSMUSG00000014329	0.226011	6.61753	1.32035	0.250529	0.75358
	ENSMUSG00000026245	0.158895	7.44333	1.31844	0.250873	0.75358
	ENSMUSG00000027746	-0.151579	7.84657	1.31807	0.250939	0.75358
	ENSMUSG00000054408	-0.219688	7.76143	1.31684	0.251161	0.75358
	ENSMUSG00000022472	-0.320668	3.63236	1.31598	0.251314	0.75358
	ENSMUSG00000040688	-0.198337	5.58422	1.31594	0.251323	0.75358
	ENSMUSG00000027601	0.28839	4.53878	1.31557	0.251389	0.75358
	ENSMUSG00000022000	0.335274	3.94485	1.31532	0.251434	0.75358
	ENSMUSG00000021116	-0.219681	6.38317	1.3141	0.251654	0.753788
	ENSMUSG00000020170	-0.218533	5.96542	1.31193	0.252045	0.754196
	ENSMUSG00000028967	0.67085	5.70662	1.31074	0.25226	0.754196
	ENSMUSG00000036144	0.191626	5.68112	1.31048	0.252307	0.754196
	ENSMUSG00000032997	0.235223	6.19265	1.31001	0.252392	0.754196
	ENSMUSG00000019577	-0.450356	9.34359	1.30918	0.252544	0.754197
	ENSMUSG00000022234	-0.11473	8.46043	1.30694	0.25295	0.754257
	ENSMUSG00000032265	0.188083	7.41318	1.30583	0.253151	0.754257
	ENSMUSG00000024991	-0.252303	4.38071	1.30554	0.253203	0.754257
	ENSMUSG00000073771	0.253178	5.21687	1.30529	0.253249	0.754257
	ENSMUSG00000039308	0.29278	3.91392	1.30442	0.253408	0.754257
	ENSMUSG00000028576	0.474971	4.0254	1.30409	0.253467	0.754257
	ENSMUSG00000081535	-0.268494	4.33298	1.3005	0.254122	0.75487
	ENSMUSG00000002731	-0.166699	6.13574	1.30016	0.254183	0.75487
	ENSMUSG00000028007	-0.258353	4.74737	1.29947	0.25431	0.75487
	ENSMUSG00000026663	-0.135128	7.45776	1.29937	0.254328	0.75487
	ENSMUSG00000046985	-0.263176	4.19784	1.29646	0.25486	0.75487
	ENSMUSG00000030788	0.15873	9.37467	1.29555	0.255028	0.75487
	ENSMUSG00000039367	0.151397	6.34131	1.29423	0.255271	0.75487
	ENSMUSG00000066232	0.143178	7.4544	1.29306	0.255485	0.75487
	ENSMUSG00000064254	-0.308665	5.23262	1.29274	0.255543	0.75487
	ENSMUSG00000020496	0.217839	6.90359	1.29142	0.255787	0.75487
	ENSMUSG00000041235	0.332249	3.95075	1.29094	0.255875	0.75487
	ENSMUSG00000036819	0.34644	3.78639	1.29079	0.255903	0.75487
	ENSMUSG00000027962	-0.281606	6.59694	1.29029	0.255995	0.75487
	ENSMUSG00000038780	0.203175	6.71247	1.29009	0.256031	0.75487
	ENSMUSG00000040054	0.160068	7.95085	1.28937	0.256165	0.75487
	ENSMUSG00000028687	-0.332895	4.51501	1.28791	0.256434	0.75487
	ENSMUSG00000037321	-0.16648	7.0468	1.28732	0.256543	0.75487
	ENSMUSG00000033955	0.242499	5.72426	1.28505	0.256963	0.75487
	ENSMUSG00000032855	0.188013	6.05968	1.284	0.257156	0.75487
	ENSMUSG00000018921	0.197872	5.78176	1.28399	0.257158	0.75487
	ENSMUSG00000026064	0.197564	8.85706	1.28355	0.257241	0.75487
	ENSMUSG00000020255	-0.223612	4.65779	1.28322	0.257301	0.75487
	ENSMUSG00000022463	0.301385	4.43541	1.28274	0.257389	0.75487
	ENSMUSG00000055817	0.254862	4.26106	1.28146	0.257628	0.75487
	ENSMUSG00000003992	0.295024	5.36722	1.28113	0.257689	0.75487
	ENSMUSG00000025477	0.204208	5.50106	1.28091	0.25773	0.75487
	ENSMUSG00000040746	0.1499	7.82187	1.28084	0.257743	0.75487
	ENSMUSG00000020526	0.224624	4.94092	1.27949	0.257993	0.755162
	ENSMUSG00000032743	0.335198	3.59988	1.27727	0.258407	0.755415
	ENSMUSG00000063888	-0.12969	7.89002	1.27591	0.25866	0.755415
	ENSMUSG00000005125	0.276811	7.6768	1.27545	0.258746	0.755415
	ENSMUSG00000039166	0.279226	5.08314	1.27454	0.258917	0.755415
	ENSMUSG00000030330	-0.166625	6.71792	1.27425	0.258971	0.755415
	ENSMUSG00000031657	0.213634	4.78869	1.27352	0.259108	0.755415
	ENSMUSG00000040712	0.163853	7.055	1.27304	0.259198	0.755415
	ENSMUSG00000040433	0.143381	9.39626	1.27256	0.259287	0.755415
	ENSMUSG00000092274	0.301407	8.9956	1.27133	0.259517	0.755648
	ENSMUSG00000039126	0.385929	5.122	1.26907	0.25994	0.756282
	ENSMUSG00000022391	-0.205826	5.54014	1.26778	0.260183	0.756282
	ENSMUSG00000027206	0.223746	5.2768	1.26776	0.260188	0.756282
	ENSMUSG00000059248	-0.22632	9.29245	1.26465	0.260772	0.756504
	ENSMUSG00000051439	-0.299149	5.53577	1.26318	0.26105	0.756504
	ENSMUSG00000051557	0.211492	5.09169	1.26274	0.261132	0.756504
	ENSMUSG00000074886	0.154646	6.31195	1.26274	0.261133	0.756504
	ENSMUSG00000006958	0.320007	4.25258	1.26156	0.261356	0.756504
	ENSMUSG00000000131	0.336833	3.68383	1.26141	0.261384	0.756504
	ENSMUSG00000035459	-0.512825	5.9288	1.25864	0.261909	0.756504
	ENSMUSG00000017631	-0.238797	6.35561	1.25812	0.262008	0.756504
	ENSMUSG00000090083	-0.244349	4.71152	1.25792	0.262045	0.756504
	ENSMUSG00000027374	0.237384	4.67418	1.25744	0.262137	0.756504
	ENSMUSG00000033526	0.208281	8.01801	1.257	0.26222	0.756504
	ENSMUSG00000097352	-0.330835	4.45977	1.25696	0.262228	0.756504
	ENSMUSG00000061079	-0.243369	5.0313	1.25696	0.262228	0.756504
	ENSMUSG00000038546	-0.216056	6.84584	1.25567	0.262473	0.756774
	ENSMUSG00000034709	-0.187583	6.46924	1.2546	0.262677	0.756926
	ENSMUSG00000048960	0.187358	8.77523	1.25154	0.263259	0.756981
	ENSMUSG00000029701	-0.319434	6.45135	1.25147	0.263271	0.756981
	ENSMUSG00000037638	-0.279643	4.52837	1.25097	0.263368	0.756981
	ENSMUSG00000020015	-0.164673	7.33828	1.24895	0.263752	0.756981
	ENSMUSG00000039879	0.176737	6.94011	1.24875	0.263791	0.756981
	ENSMUSG00000043467	0.274728	4.31201	1.24763	0.264005	0.756981
	ENSMUSG00000029641	-0.411965	4.3341	1.24752	0.264027	0.756981
	ENSMUSG00000061607	-0.28939	4.53995	1.24735	0.26406	0.756981
	ENSMUSG00000040242	0.103339	8.82847	1.24688	0.264149	0.756981
	ENSMUSG00000026313	0.232233	4.80862	1.24524	0.264463	0.756981
	ENSMUSG00000031788	0.222627	6.99285	1.24506	0.264499	0.756981
	ENSMUSG00000005682	0.199102	5.37632	1.245	0.26451	0.756981
	ENSMUSG00000020078	0.167054	6.98697	1.24364	0.264771	0.757297
	ENSMUSG00000030495	0.30826	4.77838	1.24234	0.265021	0.757578
	ENSMUSG00000028713	-0.248339	6.83129	1.24057	0.265361	0.757624
	ENSMUSG00000005803	0.167819	8.16767	1.23871	0.26572	0.757624
	ENSMUSG00000035069	-0.268028	4.64504	1.23764	0.265926	0.757624
	ENSMUSG00000028709	-0.317778	3.776	1.2373	0.265992	0.757624
	ENSMUSG00000073402	-0.22997	8.89812	1.23709	0.266033	0.757624
	ENSMUSG00000015149	0.208664	5.64065	1.23603	0.266237	0.757624
	ENSMUSG00000032425	0.23333	4.80276	1.23586	0.26627	0.757624
	ENSMUSG00000029655	-0.191733	5.32647	1.23558	0.266326	0.757624
	ENSMUSG00000020814	0.223814	6.09781	1.2352	0.266398	0.757624
	ENSMUSG00000097903	0.413065	3.84216	1.23345	0.266737	0.758156
	ENSMUSG00000042066	0.268118	4.31013	1.23059	0.267292	0.759303
	ENSMUSG00000020671	-0.150186	7.10633	1.22971	0.267464	0.759361
	ENSMUSG00000074899	-0.386759	4.22763	1.22622	0.268144	0.760477
	ENSMUSG00000039087	0.223418	6.27007	1.22538	0.268307	0.760477
	ENSMUSG00000030630	0.20424	7.84711	1.22535	0.268313	0.760477
	ENSMUSG00000060373	0.186737	6.87973	1.21959	0.269442	0.762832
	ENSMUSG00000024668	-0.149712	6.29939	1.21956	0.269448	0.762832
	ENSMUSG00000030271	0.234583	4.99321	1.21699	0.269953	0.762909
	ENSMUSG00000040339	-0.215558	8.93798	1.21653	0.270043	0.762909
	ENSMUSG00000019878	0.253811	4.21839	1.21628	0.270091	0.762909
	ENSMUSG00000032412	-0.132738	9.41408	1.21543	0.270259	0.762909
	ENSMUSG00000022516	-0.29279	4.61609	1.21522	0.270301	0.762909
	ENSMUSG00000020778	-0.333787	4.44483	1.21477	0.270389	0.762909
	ENSMUSG00000051223	-0.148609	7.70801	1.21266	0.270805	0.763652
	ENSMUSG00000003161	-0.117704	9.13634	1.20983	0.271367	0.764805
	ENSMUSG00000036620	-0.168346	5.96701	1.20737	0.271854	0.765492
	ENSMUSG00000059588	-0.383448	3.93354	1.20586	0.272153	0.765492
	ENSMUSG00000076432	-0.134879	8.20434	1.20294	0.272736	0.765492
	ENSMUSG00000020694	0.313872	4.9147	1.20274	0.272774	0.765492
	ENSMUSG00000030401	0.177944	5.93475	1.20232	0.272858	0.765492
	ENSMUSG00000024042	0.317686	7.13863	1.20135	0.273052	0.765492
	ENSMUSG00000032757	-0.268405	4.89711	1.20094	0.273134	0.765492
	ENSMUSG00000033705	-0.173622	8.80963	1.20068	0.273185	0.765492
	ENSMUSG00000004018	0.206537	5.297	1.20061	0.273199	0.765492
	ENSMUSG00000035614	-0.214774	4.77932	1.20059	0.273204	0.765492
	ENSMUSG00000021704	0.162044	5.71938	1.19886	0.273551	0.765492
	ENSMUSG00000027180	0.184093	5.819	1.1986	0.273601	0.765492
	ENSMUSG00000038213	0.173623	6.10216	1.19839	0.273644	0.765492
	ENSMUSG00000034349	-0.222033	6.2917	1.19786	0.27375	0.765492
	ENSMUSG00000041440	-0.144151	6.51593	1.19646	0.27403	0.765845
	ENSMUSG00000021982	0.275841	4.18838	1.1954	0.274244	0.766017
	ENSMUSG00000023307	0.160262	8.89714	1.19181	0.274965	0.76697
	ENSMUSG00000031070	0.453154	4.3725	1.19148	0.275031	0.76697
	ENSMUSG00000037601	-0.20758	5.87116	1.19137	0.275054	0.76697
	ENSMUSG00000017478	0.114147	7.78169	1.19065	0.275198	0.76697
	ENSMUSG00000038212	0.23308	4.66907	1.18563	0.276212	0.769163
	ENSMUSG00000018449	-0.240675	4.45891	1.18524	0.276292	0.769163
	ENSMUSG00000022108	-0.152826	10.2882	1.18188	0.276974	0.770632
	ENSMUSG00000075595	0.189235	5.82059	1.18113	0.277127	0.770632
	ENSMUSG00000023806	0.161577	7.11268	1.17956	0.277445	0.770701
	ENSMUSG00000024566	-0.167909	5.97709	1.17811	0.27774	0.770701
	ENSMUSG00000033852	0.21923	5.20579	1.17679	0.278011	0.770701
	ENSMUSG00000012428	-0.232539	11.516	1.17615	0.278141	0.770701
	ENSMUSG00000015568	0.256256	12.0467	1.17443	0.278493	0.770701
	ENSMUSG00000028453	-0.145104	6.50735	1.17393	0.278594	0.770701
	ENSMUSG00000028034	0.144767	8.03896	1.17272	0.278843	0.770701
	ENSMUSG00000031700	0.270475	7.39202	1.16922	0.279563	0.770701
	ENSMUSG00000037029	-0.129183	7.97835	1.16838	0.279735	0.770701
	ENSMUSG00000028369	-0.287306	9.41234	1.16768	0.279878	0.770701
	ENSMUSG00000045382	-0.391584	5.37839	1.16536	0.280358	0.770701
	ENSMUSG00000029591	0.244396	4.96176	1.16444	0.280546	0.770701
	ENSMUSG00000042359	0.601441	4.01666	1.16402	0.280633	0.770701
	ENSMUSG00000022012	0.366037	3.69108	1.16297	0.280851	0.770701
	ENSMUSG00000015937	-0.14489	7.00826	1.16288	0.280868	0.770701
	ENSMUSG00000026399	-0.231414	6.89181	1.16234	0.28098	0.770701
	ENSMUSG00000029575	0.217393	5.98717	1.16233	0.280982	0.770701
	ENSMUSG00000041852	0.21127	4.23813	1.16159	0.281137	0.770701
	ENSMUSG00000020707	-0.178782	5.35255	1.161	0.281259	0.770701
	ENSMUSG00000010651	0.191464	8.05635	1.16084	0.281292	0.770701
	ENSMUSG00000023456	-0.239248	10.4519	1.16065	0.28133	0.770701
	ENSMUSG00000024002	0.188253	5.84778	1.16063	0.281335	0.770701
	ENSMUSG00000020023	0.178171	7.90607	1.16045	0.281373	0.770701
	ENSMUSG00000021806	-0.220314	7.78894	1.15954	0.28156	0.770701
	ENSMUSG00000074874	-0.219711	5.1127	1.15944	0.281583	0.770701
	ENSMUSG00000042675	0.247043	6.77323	1.15942	0.281586	0.770701
	ENSMUSG00000097971	0.331165	13.9941	1.15842	0.281794	0.770701
	ENSMUSG00000025464	0.311117	4.23521	1.15821	0.281836	0.770701
	ENSMUSG00000018819	-0.291944	6.14492	1.15797	0.281887	0.770701
	ENSMUSG00000058135	0.330881	8.41663	1.15701	0.282087	0.770701
	ENSMUSG00000020865	-0.210037	7.00129	1.15673	0.282146	0.770701
	ENSMUSG00000075297	-0.25574	4.39352	1.15663	0.282166	0.770701
	ENSMUSG00000025732	0.295504	4.77336	1.15513	0.282478	0.770701
	ENSMUSG00000020832	0.244143	5.27044	1.15495	0.282514	0.770701
	ENSMUSG00000001525	-0.186014	9.43438	1.15414	0.282684	0.770701
	ENSMUSG00000024395	0.22664	8.16253	1.1534	0.282838	0.770701
	ENSMUSG00000030966	-0.152954	6.06399	1.15277	0.28297	0.770701
	ENSMUSG00000085148	-0.221804	5.06164	1.15241	0.283044	0.770701
	ENSMUSG00000024594	0.178641	6.10407	1.15189	0.283154	0.770701
	ENSMUSG00000072915	-0.288492	3.94062	1.14785	0.284	0.771128
	ENSMUSG00000005362	0.217433	4.5811	1.14649	0.284285	0.771128
	ENSMUSG00000003226	-0.2131	5.31253	1.1464	0.284303	0.771128
	ENSMUSG00000008540	0.175251	10.7097	1.14586	0.284418	0.771128
	ENSMUSG00000038718	-0.335912	3.75464	1.1456	0.284472	0.771128
	ENSMUSG00000024927	0.148593	6.28864	1.14456	0.28469	0.771128
	ENSMUSG00000033910	0.279827	6.43885	1.14391	0.284829	0.771128
	ENSMUSG00000025780	0.215017	6.85684	1.1438	0.28485	0.771128
	ENSMUSG00000026208	0.790934	7.30154	1.14303	0.285013	0.771128
	ENSMUSG00000009545	-0.298271	3.75489	1.14299	0.285021	0.771128
	ENSMUSG00000053929	0.145209	6.51775	1.14195	0.285242	0.771128
	ENSMUSG00000067430	0.181129	5.8766	1.1419	0.285252	0.771128
	ENSMUSG00000038525	0.138018	7.5176	1.14123	0.285393	0.771128
	ENSMUSG00000022353	-0.262258	4.61219	1.13931	0.285799	0.771128
	ENSMUSG00000092837	-0.199379	14.2987	1.13844	0.285981	0.771128
	ENSMUSG00000060679	-0.246886	5.10891	1.13833	0.286006	0.771128
	ENSMUSG00000034667	-0.108037	8.44554	1.13825	0.286022	0.771128
	ENSMUSG00000027339	-0.262724	7.48093	1.13797	0.286082	0.771128
	ENSMUSG00000031697	-0.140361	6.32182	1.13485	0.286742	0.772492
	ENSMUSG00000058013	-0.180977	6.75447	1.13172	0.287408	0.772793
	ENSMUSG00000042349	-0.298501	5.08916	1.13146	0.287465	0.772793
	ENSMUSG00000029524	0.256512	4.05684	1.13079	0.287608	0.772793
	ENSMUSG00000016619	-0.172898	5.99393	1.13052	0.287665	0.772793
	ENSMUSG00000028901	-0.154242	5.89819	1.12969	0.287842	0.772793
	ENSMUSG00000078380	-0.41212	3.91518	1.12944	0.287895	0.772793
	ENSMUSG00000028672	-0.201775	5.27134	1.12925	0.287934	0.772793
	ENSMUSG00000028291	-0.185204	5.6833	1.12753	0.288303	0.773368
	ENSMUSG00000066705	0.575317	4.97314	1.1263	0.288566	0.77366
	ENSMUSG00000009927	-0.151404	10.3095	1.12249	0.289383	0.775153
	ENSMUSG00000040795	0.133833	6.28667	1.12208	0.289472	0.775153
	ENSMUSG00000020459	-0.157842	6.17512	1.12154	0.289588	0.775153
	ENSMUSG00000025934	0.314007	6.36783	1.11913	0.290106	0.776125
	ENSMUSG00000027947	-0.26086	4.90456	1.11799	0.290353	0.776372
	ENSMUSG00000041741	0.297328	5.82399	1.11609	0.290763	0.776676
	ENSMUSG00000038188	-0.234925	4.37238	1.11602	0.290777	0.776676
	ENSMUSG00000078700	-0.203218	4.80361	1.11472	0.291058	0.776998
	ENSMUSG00000027189	0.0978745	9.23083	1.11332	0.291361	0.776998
	ENSMUSG00000027881	0.293556	5.19116	1.11278	0.291479	0.776998
	ENSMUSG00000045160	0.208251	5.14632	1.11255	0.291529	0.776998
	ENSMUSG00000026380	0.406372	4.3483	1.11158	0.291739	0.776998
	ENSMUSG00000021340	0.190646	6.95995	1.111	0.291866	0.776998
	ENSMUSG00000030882	0.283846	3.82611	1.11045	0.291983	0.776998
	ENSMUSG00000052727	0.433765	5.64183	1.10889	0.292322	0.777135
	ENSMUSG00000034175	0.237882	5.01921	1.10783	0.292555	0.777135
	ENSMUSG00000044788	-0.377145	4.25031	1.10774	0.292573	0.777135
	ENSMUSG00000023795	-0.348494	3.77484	1.10684	0.292771	0.777135
	ENSMUSG00000033439	-0.191947	5.425	1.10665	0.292811	0.777135
	ENSMUSG00000006800	0.164473	7.90934	1.1054	0.293084	0.77721
	ENSMUSG00000032059	0.146046	6.52214	1.10406	0.293377	0.77721
	ENSMUSG00000030268	-0.555571	5.85485	1.10347	0.293507	0.77721
	ENSMUSG00000027217	-0.327023	4.3383	1.10335	0.293531	0.77721
	ENSMUSG00000021577	0.182815	9.9448	1.10297	0.293615	0.77721
	ENSMUSG00000022876	-0.331161	4.37348	1.10112	0.294021	0.777412
	ENSMUSG00000047284	0.144716	6.69946	1.09891	0.294506	0.777412
	ENSMUSG00000025241	0.109909	9.78488	1.09888	0.294511	0.777412
	ENSMUSG00000030231	0.322749	6.96867	1.09821	0.29466	0.777412
	ENSMUSG00000020612	-0.176727	5.72318	1.09729	0.294861	0.777412
	ENSMUSG00000034501	0.204134	5.10455	1.09676	0.294979	0.777412
	ENSMUSG00000030278	0.229492	12.1288	1.09668	0.294995	0.777412
	ENSMUSG00000022747	0.190138	7.12129	1.09635	0.295069	0.777412
	ENSMUSG00000024076	0.424364	3.80199	1.09622	0.295098	0.777412
	ENSMUSG00000039656	0.215816	5.13827	1.09556	0.295244	0.777412
	ENSMUSG00000033543	0.172566	6.33288	1.09439	0.2955	0.77768
	ENSMUSG00000070871	-0.151065	5.85872	1.0923	0.295962	0.778487
	ENSMUSG00000020105	0.283822	5.64912	1.09077	0.2963	0.778553
	ENSMUSG00000020476	-0.141335	6.21935	1.0892	0.296649	0.778553
	ENSMUSG00000020593	0.297506	9.70708	1.08918	0.296652	0.778553
	ENSMUSG00000086448	0.3705	3.89943	1.0874	0.297049	0.778553
	ENSMUSG00000069743	0.293882	4.21925	1.08584	0.297395	0.778553
	ENSMUSG00000060429	-0.239224	5.41914	1.08307	0.298011	0.778553
	ENSMUSG00000019433	-0.163738	6.28599	1.0828	0.298072	0.778553
	ENSMUSG00000038046	0.227518	5.28177	1.08163	0.298334	0.778553
	ENSMUSG00000090150	0.172605	8.17234	1.08144	0.298376	0.778553
	ENSMUSG00000070939	0.153859	7.09616	1.08111	0.29845	0.778553
	ENSMUSG00000037815	0.117	7.87884	1.07982	0.298737	0.778553
	ENSMUSG00000009394	0.281859	4.31658	1.07981	0.298741	0.778553
	ENSMUSG00000074884	-0.273833	4.29609	1.07979	0.298744	0.778553
	ENSMUSG00000061232	-0.188629	13.2922	1.07891	0.298942	0.778553
	ENSMUSG00000039740	-0.161945	6.5685	1.07879	0.298968	0.778553
	ENSMUSG00000056220	0.422409	6.30291	1.07868	0.298994	0.778553
	ENSMUSG00000027425	0.145007	6.22648	1.07849	0.299035	0.778553
	ENSMUSG00000019988	-0.228229	4.30034	1.07834	0.29907	0.778553
	ENSMUSG00000060475	-0.137603	6.68896	1.07764	0.299226	0.778553
	ENSMUSG00000043411	-0.154315	6.65515	1.0771	0.299348	0.778553
	ENSMUSG00000041936	0.284699	5.96509	1.07664	0.29945	0.778553
	ENSMUSG00000022443	0.248848	6.3168	1.07593	0.299611	0.778553
	ENSMUSG00000040263	-0.148165	6.76618	1.07479	0.299865	0.778553
	ENSMUSG00000017843	-0.100358	8.458	1.07426	0.299986	0.778553
	ENSMUSG00000041642	-0.242301	6.0752	1.07409	0.300023	0.778553
	ENSMUSG00000006463	0.197331	4.47316	1.07351	0.300154	0.778553
	ENSMUSG00000021326	-0.155851	6.02457	1.07318	0.300228	0.778553
	ENSMUSG00000057497	-0.19313	6.12758	1.07136	0.300638	0.778553
	ENSMUSG00000059263	0.104911	8.61951	1.07134	0.300644	0.778553
	ENSMUSG00000001424	-0.147003	6.47165	1.07005	0.300934	0.778553
	ENSMUSG00000040152	-0.466054	11.6766	1.06978	0.300995	0.778553
	ENSMUSG00000031958	0.320835	5.93161	1.06796	0.301406	0.778553
	ENSMUSG00000006611	-0.271982	8.33056	1.06784	0.301435	0.778553
	ENSMUSG00000041629	-0.190974	5.48518	1.06705	0.301612	0.778553
	ENSMUSG00000030166	-0.275956	4.24138	1.06649	0.301739	0.778553
	ENSMUSG00000036752	0.218019	8.22489	1.06502	0.302072	0.778553
	ENSMUSG00000024132	0.187531	6.43855	1.06491	0.302098	0.778553
	ENSMUSG00000021514	-0.251204	4.71685	1.06378	0.302355	0.778553
	ENSMUSG00000003131	-0.131967	6.45987	1.06356	0.302405	0.778553
	ENSMUSG00000028957	0.489554	7.66006	1.06304	0.302523	0.778553
	ENSMUSG00000009741	0.159422	5.46619	1.06298	0.302536	0.778553
	ENSMUSG00000029815	0.199441	5.32464	1.06147	0.302881	0.778553
	ENSMUSG00000034653	-0.157178	5.55238	1.06094	0.303001	0.778553
	ENSMUSG00000004994	-0.263295	4.10711	1.06073	0.303049	0.778553
	ENSMUSG00000029096	0.199291	9.39695	1.06058	0.303083	0.778553
	ENSMUSG00000020859	-0.107191	10.2235	1.05939	0.303354	0.778553
	ENSMUSG00000081788	0.207631	5.26751	1.0591	0.303419	0.778553
	ENSMUSG00000060981	0.268225	5.40433	1.05897	0.303449	0.778553
	ENSMUSG00000029430	-0.180945	8.40515	1.058	0.303671	0.778724
	ENSMUSG00000026342	-0.142083	7.04394	1.05534	0.304281	0.779887
	ENSMUSG00000029622	-0.184605	10.2366	1.05418	0.304546	0.779955
	ENSMUSG00000026615	-0.123511	9.74464	1.05386	0.304619	0.779955
	ENSMUSG00000035569	0.131294	7.54894	1.04956	0.305608	0.781573
	ENSMUSG00000050390	0.293133	5.31479	1.04877	0.30579	0.781573
	ENSMUSG00000056917	0.197379	6.94984	1.0471	0.306175	0.781573
	ENSMUSG00000055485	0.130881	8.2657	1.04586	0.306462	0.781573
	ENSMUSG00000021188	0.121492	6.81877	1.0453	0.306592	0.781573
	ENSMUSG00000020889	0.456163	4.27723	1.04501	0.306658	0.781573
	ENSMUSG00000085881	0.38775	3.63615	1.04442	0.306795	0.781573
	ENSMUSG00000024325	0.225667	5.44636	1.04375	0.306951	0.781573
	ENSMUSG00000026439	-0.122715	6.28975	1.04366	0.306972	0.781573
	ENSMUSG00000060586	-0.265061	10.9932	1.04342	0.307026	0.781573
	ENSMUSG00000097617	0.234501	4.47587	1.04199	0.307358	0.781573
	ENSMUSG00000082100	-0.308778	5.00134	1.04174	0.307416	0.781573
	ENSMUSG00000021134	0.223858	7.46269	1.04174	0.307416	0.781573
	ENSMUSG00000012429	0.25119	4.57291	1.04166	0.307436	0.781573
	ENSMUSG00000038181	-0.205588	5.11342	1.03745	0.308415	0.782904
	ENSMUSG00000026520	-0.315096	3.99617	1.03733	0.308442	0.782904
	ENSMUSG00000039377	0.258333	4.3758	1.03693	0.308535	0.782904
	ENSMUSG00000038587	0.245789	5.63909	1.03659	0.308616	0.782904
	ENSMUSG00000029020	0.174771	7.4175	1.03518	0.308946	0.782904
	ENSMUSG00000027660	0.268548	4.20957	1.03502	0.308982	0.782904
	ENSMUSG00000044501	-0.224713	5.17984	1.03392	0.30924	0.782904
	ENSMUSG00000043079	0.302827	4.04122	1.03343	0.309355	0.782904
	ENSMUSG00000075000	-0.159444	5.50996	1.03338	0.309366	0.782904
	ENSMUSG00000029186	-0.281567	4.05221	1.03166	0.30977	0.78353
	ENSMUSG00000058070	0.289298	5.62951	1.02945	0.310287	0.784442
	ENSMUSG00000036073	-0.160131	5.61364	1.02714	0.31083	0.784697
	ENSMUSG00000022967	-0.182913	5.34149	1.02603	0.311092	0.784697
	ENSMUSG00000046841	-0.218241	6.70029	1.0258	0.311147	0.784697
	ENSMUSG00000035936	0.216444	5.92529	1.02528	0.31127	0.784697
	ENSMUSG00000024383	-0.319731	3.56679	1.02445	0.311466	0.784697
	ENSMUSG00000027858	0.524371	4.77574	1.02333	0.311732	0.784697
	ENSMUSG00000090877	0.547517	6.38495	1.0232	0.311761	0.784697
	ENSMUSG00000026617	0.174301	8.44012	1.02288	0.311836	0.784697
	ENSMUSG00000035697	-0.267869	4.38703	1.02256	0.311912	0.784697
	ENSMUSG00000002732	0.156132	6.35046	1.0222	0.311998	0.784697
	ENSMUSG00000029076	0.107306	9.76221	1.02086	0.312316	0.784697
	ENSMUSG00000021792	0.171869	9.01737	1.02042	0.312419	0.784697
	ENSMUSG00000009894	0.141831	6.81666	1.0204	0.312425	0.784697
	ENSMUSG00000062619	0.238986	5.47666	1.01906	0.312742	0.785099
	ENSMUSG00000031969	0.240604	5.23728	1.0176	0.31309	0.785365
	ENSMUSG00000048138	0.301494	8.6292	1.01705	0.313221	0.785365
	ENSMUSG00000040170	0.397264	8.07173	1.01664	0.313318	0.785365
	ENSMUSG00000010358	0.279545	3.74889	1.01595	0.313481	0.785381
[truncated: 3,481 more rows]

## Sheet: Cross.Sex
	Gene	logFC	logCPM	LR	PValue	FDR
	ENSMUSG00000020594	-1.09905	5.05166	14.5677	0.000135215	0.339599
	ENSMUSG00000034158	-0.917402	5.38698	13.8807	0.00019479	0.339599
	ENSMUSG00000027656	2.46669	7.874	12.8184	0.000343235	0.339599
	ENSMUSG00000015980	-0.795545	5.92703	12.4251	0.000423602	0.339599
	ENSMUSG00000048677	1.1331	6.20987	12.0631	0.000514306	0.339599
	ENSMUSG00000052336	1.40164	5.01503	12.0215	0.000525917	0.339599
	ENSMUSG00000057181	-1.10983	4.52181	12.0073	0.000529931	0.339599
	ENSMUSG00000045414	-0.929523	8.13492	11.9819	0.000537189	0.339599
	ENSMUSG00000059713	1.17223	4.36813	10.4917	0.00119913	0.646896
	ENSMUSG00000031523	-0.88467	6.96952	9.56982	0.00197802	0.646896
	ENSMUSG00000029005	1.25909	4.23644	9.4084	0.00215994	0.646896
	ENSMUSG00000068794	1.51804	3.68268	9.40196	0.00216753	0.646896
	ENSMUSG00000025277	-1.06859	5.09545	9.32525	0.00226018	0.646896
	ENSMUSG00000031659	1.11635	7.23576	9.29101	0.00230281	0.646896
	ENSMUSG00000020437	1.03758	5.83511	9.19752	0.00242343	0.646896
	ENSMUSG00000032332	1.08026	5.38307	9.1151	0.00253509	0.646896
	ENSMUSG00000026437	1.66491	4.29991	9.02474	0.0026635	0.646896
	ENSMUSG00000028410	-0.935692	5.4	8.82609	0.00296954	0.646896
	ENSMUSG00000020876	0.581351	6.21201	8.80246	0.00300824	0.646896
	ENSMUSG00000006731	1.63407	3.95722	8.79003	0.00302882	0.646896
	ENSMUSG00000026321	1.10178	5.32789	8.69592	0.00318922	0.646896
	ENSMUSG00000025024	-1.20886	4.07241	8.67568	0.00322485	0.646896
	ENSMUSG00000029203	-0.484953	7.14217	8.62848	0.00330947	0.646896
	ENSMUSG00000026463	-0.824517	7.60899	8.56841	0.00342046	0.646896
	ENSMUSG00000040479	1.0218	5.59142	8.43371	0.00368328	0.646896
	ENSMUSG00000042082	0.800844	5.49572	8.34863	0.00385978	0.646896
	ENSMUSG00000026005	-0.806168	6.09006	8.1936	0.00420384	0.646896
	ENSMUSG00000032263	-0.656434	7.55634	8.14815	0.00431051	0.646896
	ENSMUSG00000078249	1.28041	6.69012	8.08139	0.0044722	0.646896
	ENSMUSG00000042476	1.18061	4.78443	7.90593	0.0049273	0.646896
	ENSMUSG00000054520	1.00645	6.81393	7.88425	0.00498673	0.646896
	ENSMUSG00000094483	-0.697561	5.44705	7.86487	0.00504044	0.646896
	ENSMUSG00000035799	1.01749	4.25068	7.81084	0.00519338	0.646896
	ENSMUSG00000044145	1.06916	4.26293	7.7295	0.00543258	0.646896
	ENSMUSG00000037773	0.977394	4.91327	7.71832	0.00546633	0.646896
	ENSMUSG00000020661	0.782891	5.50898	7.71029	0.0054907	0.646896
	ENSMUSG00000051041	-0.562956	8.21797	7.70403	0.00550977	0.646896
	ENSMUSG00000025743	0.693949	8.09995	7.66267	0.00563752	0.646896
	ENSMUSG00000040035	-1.55623	6.29619	7.62046	0.00577098	0.646896
	ENSMUSG00000005580	0.672142	5.43718	7.58735	0.00587793	0.646896
	ENSMUSG00000028884	0.635569	6.05407	7.58569	0.00588334	0.646896
	ENSMUSG00000032812	0.698032	5.86029	7.5199	0.00610209	0.646896
	ENSMUSG00000021987	-0.911849	4.33612	7.45235	0.00633538	0.646896
	ENSMUSG00000062078	-0.711125	7.15091	7.42339	0.00643814	0.646896
	ENSMUSG00000037058	-0.644294	6.21144	7.40003	0.00652226	0.646896
	ENSMUSG00000006057	0.675459	6.6203	7.39148	0.00655335	0.646896
	ENSMUSG00000072244	-0.841845	4.79676	7.35928	0.00667175	0.646896
	ENSMUSG00000053062	-0.62595	6.58033	7.3146	0.00683967	0.646896
	ENSMUSG00000022878	-0.922014	10.0465	7.29131	0.00692891	0.646896
	ENSMUSG00000037280	1.64551	4.49882	7.27458	0.00699372	0.646896
	ENSMUSG00000030786	1.12716	4.54206	7.21263	0.00723925	0.646896
	ENSMUSG00000030612	-0.759391	4.70959	7.18131	0.0073667	0.646896
	ENSMUSG00000057219	0.892829	3.98717	7.16055	0.00745242	0.646896
	ENSMUSG00000060733	0.779115	5.38397	7.15502	0.00747543	0.646896
	ENSMUSG00000038024	0.66573	7.19109	7.14678	0.00750986	0.646896
	ENSMUSG00000017897	0.868217	4.43287	7.10794	0.00767431	0.646896
	ENSMUSG00000030707	1.02504	5.89517	7.0691	0.00784249	0.646896
	ENSMUSG00000024413	0.523343	8.33927	7.04604	0.00794406	0.646896
	ENSMUSG00000035783	-1.36612	3.70343	7.04538	0.00794698	0.646896
	ENSMUSG00000002847	1.04428	6.92838	7.02769	0.00802589	0.646896
	ENSMUSG00000068335	0.83128	5.99909	6.97092	0.0082845	0.646896
	ENSMUSG00000045328	1.35991	3.56931	6.92105	0.00851868	0.646896
	ENSMUSG00000042447	-0.835002	4.06872	6.82049	0.00901176	0.646896
	ENSMUSG00000021109	-0.514459	9.24173	6.81789	0.00902492	0.646896
	ENSMUSG00000062929	-0.519276	7.87514	6.79083	0.00916274	0.646896
	ENSMUSG00000051319	-0.978313	4.93829	6.7389	0.0094333	0.646896
	ENSMUSG00000089672	1.35871	8.61246	6.73234	0.00946801	0.646896
	ENSMUSG00000051910	-0.970271	5.30995	6.71299	0.0095713	0.646896
	ENSMUSG00000022180	0.75979	6.20134	6.71175	0.00957798	0.646896
	ENSMUSG00000027715	1.02278	4.92194	6.69012	0.00969489	0.646896
	ENSMUSG00000051212	1.07152	3.94454	6.67453	0.00978004	0.646896
	ENSMUSG00000031445	2.00736	4.02928	6.65837	0.00986914	0.646896
	ENSMUSG00000018774	1.37968	8.97383	6.65623	0.009881	0.646896
	ENSMUSG00000034842	-0.763935	7.47009	6.65556	0.00988469	0.646896
	ENSMUSG00000068329	0.777136	5.10834	6.64366	0.00995091	0.646896
	ENSMUSG00000001555	0.729182	5.43218	6.62904	0.0100329	0.646896
	ENSMUSG00000031584	-0.891998	6.09543	6.52446	0.0106401	0.646896
	ENSMUSG00000049538	1.50518	4.91949	6.50884	0.010734	0.646896
	ENSMUSG00000019899	0.63614	8.79157	6.49602	0.0108116	0.646896
	ENSMUSG00000033623	0.981958	4.23357	6.45937	0.0110369	0.646896
	ENSMUSG00000049281	-1.73628	4.1698	6.44777	0.0111092	0.646896
	ENSMUSG00000054814	-0.936989	4.07555	6.42148	0.0112748	0.646896
	ENSMUSG00000020652	0.660444	5.52524	6.4075	0.0113639	0.646896
	ENSMUSG00000087691	1.26751	4.17802	6.37283	0.0115881	0.646896
	ENSMUSG00000028327	2.10806	3.98031	6.37104	0.0115998	0.646896
	ENSMUSG00000006589	1.11198	6.07638	6.35181	0.0117261	0.646896
	ENSMUSG00000032883	-0.959578	4.9748	6.33895	0.0118115	0.646896
	ENSMUSG00000021732	-0.679667	7.50965	6.33712	0.0118237	0.646896
	ENSMUSG00000020818	0.57251	5.75088	6.27636	0.0122359	0.646896
	ENSMUSG00000021665	0.815695	5.97876	6.26239	0.0123328	0.646896
	ENSMUSG00000032293	-0.83562	5.1062	6.2355	0.0125214	0.646896
	ENSMUSG00000019194	0.636861	6.55559	6.17229	0.0129767	0.646896
	ENSMUSG00000021646	-0.770685	6.6908	6.14497	0.0131786	0.646896
	ENSMUSG00000045210	-1.0156	3.81775	6.13901	0.0132232	0.646896
	ENSMUSG00000022853	-1.45884	4.31385	6.13686	0.0132392	0.646896
	ENSMUSG00000032643	0.784223	5.02758	6.13271	0.0132703	0.646896
	ENSMUSG00000021190	0.933907	7.17131	6.09683	0.0135425	0.646896
	ENSMUSG00000001751	0.738827	5.29055	6.07735	0.0136926	0.646896
	ENSMUSG00000028672	0.66252	5.27134	6.07432	0.0137161	0.646896
	ENSMUSG00000030204	0.447896	6.6902	6.05709	0.0138506	0.646896
	ENSMUSG00000029254	1.40766	4.52212	6.05096	0.0138987	0.646896
	ENSMUSG00000040249	0.497075	11.1519	6.03893	0.0139938	0.646896
	ENSMUSG00000073982	0.614749	6.5305	6.03833	0.0139985	0.646896
	ENSMUSG00000046711	1.19643	5.52795	6.0336	0.0140361	0.646896
	ENSMUSG00000028300	-0.601179	9.54538	6.02222	0.0141269	0.646896
	ENSMUSG00000028581	1.17115	4.4457	6.0171	0.0141679	0.646896
	ENSMUSG00000037731	0.62847	5.92426	6.01239	0.0142058	0.646896
	ENSMUSG00000031951	-1.45849	3.86402	6.0008	0.0142994	0.646896
	ENSMUSG00000022305	0.948138	5.24227	6.00046	0.0143022	0.646896
	ENSMUSG00000049037	0.736868	6.08696	5.95345	0.0146886	0.646896
	ENSMUSG00000035891	0.864178	8.14612	5.92856	0.0148974	0.646896
	ENSMUSG00000062417	1.3035	3.84973	5.92533	0.0149248	0.646896
	ENSMUSG00000022757	-0.483422	8.02934	5.92034	0.0149671	0.646896
	ENSMUSG00000037902	0.727863	9.4034	5.9122	0.0150363	0.646896
	ENSMUSG00000024542	0.42242	7.26843	5.90228	0.0151213	0.646896
	ENSMUSG00000023994	0.719778	5.86642	5.89564	0.0151784	0.646896
	ENSMUSG00000021322	0.984873	4.55819	5.88059	0.0153087	0.646896
	ENSMUSG00000070942	1.01332	4.50611	5.8542	0.01554	0.646896
	ENSMUSG00000039959	0.60575	6.15468	5.85164	0.0155626	0.646896
	ENSMUSG00000009907	0.405582	6.51363	5.82459	0.0158036	0.646896
	ENSMUSG00000062593	1.29522	7.69098	5.81776	0.0158651	0.646896
	ENSMUSG00000030788	-0.493391	9.37467	5.80607	0.015971	0.646896
	ENSMUSG00000003644	0.834295	4.42655	5.80293	0.0159995	0.646896
	ENSMUSG00000058298	0.898672	4.30253	5.77164	0.0162868	0.646896
	ENSMUSG00000080917	1.24913	4.62448	5.76954	0.0163063	0.646896
	ENSMUSG00000029291	0.844507	4.53995	5.72857	0.0166911	0.646896
	ENSMUSG00000097815	-0.901311	6.41861	5.72394	0.0167351	0.646896
	ENSMUSG00000025324	-0.678158	6.95023	5.72292	0.0167449	0.646896
	ENSMUSG00000040433	-0.44777	9.39626	5.71995	0.0167732	0.646896
	ENSMUSG00000040010	0.863339	5.18414	5.7129	0.0168407	0.646896
	ENSMUSG00000032118	1.21059	4.21678	5.70969	0.0168716	0.646896
	ENSMUSG00000022285	0.465738	7.70821	5.70611	0.016906	0.646896
	ENSMUSG00000032122	1.37991	7.87196	5.68883	0.0170732	0.646896
	ENSMUSG00000030811	1.10986	3.82017	5.68199	0.01714	0.646896
	ENSMUSG00000034656	0.771371	5.51018	5.66121	0.0173442	0.649755
	ENSMUSG00000092517	1.78934	5.44965	5.6414	0.0175412	0.652302
	ENSMUSG00000030269	0.569303	5.85446	5.60571	0.017902	0.660863
	ENSMUSG00000005360	-1.49423	4.24327	5.54753	0.0185068	0.678236
	ENSMUSG00000021585	-0.576577	7.27005	5.49988	0.0190178	0.687744
	ENSMUSG00000019877	-0.488883	9.01124	5.49801	0.0190382	0.687744
	ENSMUSG00000042594	0.806744	4.67682	5.47077	0.0193371	0.693588
	ENSMUSG00000006304	0.537139	6.80673	5.44012	0.0196793	0.695087
	ENSMUSG00000006519	1.06219	8.46081	5.42257	0.019878	0.695087
	ENSMUSG00000048865	0.93049	7.53174	5.41521	0.0199621	0.695087
	ENSMUSG00000037295	0.494329	6.76659	5.39698	0.0201716	0.695087
	ENSMUSG00000023992	1.4526	8.05542	5.37904	0.0203801	0.695087
	ENSMUSG00000025240	-0.529087	6.36927	5.37177	0.0204652	0.695087
	ENSMUSG00000026177	1.04531	7.5148	5.3693	0.0204942	0.695087
	ENSMUSG00000009376	-0.655464	6.7128	5.35581	0.0206534	0.695087
	ENSMUSG00000037466	0.956664	3.70927	5.35278	0.0206892	0.695087
	ENSMUSG00000029524	-0.839791	4.05684	5.34739	0.0207533	0.695087
	ENSMUSG00000006273	0.709576	8.19481	5.25187	0.0219232	0.707032
	ENSMUSG00000020777	-0.548606	9.80363	5.2456	0.0220024	0.707032
	ENSMUSG00000020029	-0.516052	10.2502	5.24475	0.0220131	0.707032
	ENSMUSG00000050345	-0.952651	3.93146	5.23574	0.0221273	0.707032
	ENSMUSG00000056962	0.820157	4.79064	5.23508	0.0221358	0.707032
	ENSMUSG00000016664	0.397676	6.52157	5.22116	0.0223136	0.707032
	ENSMUSG00000024079	-0.752763	4.11009	5.21591	0.0223811	0.707032
	ENSMUSG00000028383	-0.59074	8.19342	5.18975	0.0227205	0.707032
	ENSMUSG00000024663	0.655071	5.85344	5.18857	0.0227359	0.707032
	ENSMUSG00000033543	-0.548191	6.33288	5.1881	0.0227421	0.707032
	ENSMUSG00000019943	-0.633447	5.69339	5.17637	0.0228961	0.707032
	ENSMUSG00000020658	0.896963	5.10927	5.14655	0.0232927	0.707032
	ENSMUSG00000022831	1.03221	5.35869	5.14125	0.0233638	0.707032
	ENSMUSG00000048490	-0.714301	9.16343	5.1384	0.0234022	0.707032
	ENSMUSG00000021650	-0.876431	3.88395	5.08459	0.0241394	0.707032
	ENSMUSG00000023921	-0.54336	9.0349	5.07716	0.024243	0.707032
	ENSMUSG00000014470	0.431581	7.04465	5.06339	0.0244364	0.707032
	ENSMUSG00000004455	0.605637	6.89127	5.04996	0.0246265	0.707032
	ENSMUSG00000059049	1.42539	4.65206	5.04525	0.0246936	0.707032
	ENSMUSG00000081043	-1.31328	10.2524	5.03206	0.0248823	0.707032
	ENSMUSG00000062382	1.14608	3.82064	5.02894	0.0249271	0.707032
	ENSMUSG00000055782	-0.7674	10.9916	5.01398	0.0251434	0.707032
	ENSMUSG00000021550	-0.676693	4.54173	4.99879	0.025365	0.707032
	ENSMUSG00000027274	-0.468491	7.76601	4.97807	0.0256706	0.707032
	ENSMUSG00000021068	0.490849	7.98234	4.97704	0.0256858	0.707032
	ENSMUSG00000003134	0.86875	4.69652	4.97233	0.025756	0.707032
	ENSMUSG00000045038	-0.791555	6.16764	4.96984	0.0257931	0.707032
	ENSMUSG00000028992	-0.912806	3.69958	4.96841	0.0258144	0.707032
	ENSMUSG00000072704	-0.442743	9.70439	4.94945	0.0260989	0.707032
	ENSMUSG00000021474	-0.88565	5.08944	4.93086	0.0263812	0.707032
	ENSMUSG00000037940	-0.517139	7.50826	4.93076	0.0263827	0.707032
	ENSMUSG00000024479	-1.08485	3.99273	4.88071	0.0271585	0.707032
	ENSMUSG00000026288	0.770247	4.66045	4.87361	0.0272704	0.707032
	ENSMUSG00000026193	0.771802	9.88077	4.8685	0.0273513	0.707032
	ENSMUSG00000050335	1.28478	9.3171	4.8673	0.0273703	0.707032
	ENSMUSG00000030147	0.975489	5.17537	4.86215	0.027452	0.707032
	ENSMUSG00000022139	-0.460899	9.97652	4.84006	0.0278059	0.707032
	ENSMUSG00000006717	-0.486154	6.13906	4.83954	0.0278144	0.707032
	ENSMUSG00000028496	-0.678082	6.32228	4.80261	0.0284167	0.707032
	ENSMUSG00000027940	0.384066	8.49249	4.7961	0.0285243	0.707032
	ENSMUSG00000030263	0.769121	6.70455	4.79408	0.0285577	0.707032
	ENSMUSG00000024300	1.10706	7.47147	4.77761	0.0288321	0.707032
	ENSMUSG00000027293	0.544651	6.89358	4.77495	0.0288766	0.707032
	ENSMUSG00000032050	-0.378587	8.75561	4.75643	0.029189	0.707032
	ENSMUSG00000023027	0.451184	5.69434	4.75605	0.0291954	0.707032
	ENSMUSG00000034216	0.490742	6.70071	4.75514	0.0292109	0.707032
	ENSMUSG00000026872	1.07945	3.64497	4.74989	0.0293001	0.707032
	ENSMUSG00000029816	1.79205	9.61694	4.74662	0.0293559	0.707032
	ENSMUSG00000020649	1.01834	4.22197	4.74186	0.0294373	0.707032
	ENSMUSG00000096010	0.593269	6.38855	4.71711	0.029864	0.707032
	ENSMUSG00000013663	-0.497582	8.05124	4.66243	0.0308295	0.707032
	ENSMUSG00000044221	-0.547203	5.40534	4.65435	0.030975	0.707032
	ENSMUSG00000037235	-0.462758	6.32105	4.65195	0.0310183	0.707032
	ENSMUSG00000025105	-1.28793	4.51445	4.64103	0.0312163	0.707032
	ENSMUSG00000044600	-0.702381	5.23637	4.63971	0.0312403	0.707032
	ENSMUSG00000034620	-0.33517	7.75469	4.6385	0.0312623	0.707032
	ENSMUSG00000039167	-0.394147	7.40613	4.62938	0.0314289	0.707032
	ENSMUSG00000024038	-0.617543	4.93393	4.62747	0.031464	0.707032
	ENSMUSG00000022241	0.492793	5.37814	4.62554	0.0314993	0.707032
	ENSMUSG00000027804	-0.449348	6.67366	4.62077	0.031587	0.707032
	ENSMUSG00000039738	0.82448	4.23652	4.61179	0.0317528	0.707032
	ENSMUSG00000020526	-0.611349	4.94092	4.61152	0.0317578	0.707032
	ENSMUSG00000019978	-0.45945	8.92866	4.60086	0.0319559	0.707032
	ENSMUSG00000050930	-0.753646	4.68737	4.59882	0.031994	0.707032
	ENSMUSG00000052798	0.44289	5.93402	4.57752	0.0323941	0.707032
	ENSMUSG00000020380	-0.533248	5.81294	4.57119	0.0325139	0.707032
	ENSMUSG00000021765	0.985508	4.96627	4.56872	0.0325609	0.707032
	ENSMUSG00000029826	0.543349	5.55918	4.54637	0.0329886	0.707032
	ENSMUSG00000018583	-0.473416	7.29243	4.53672	0.033175	0.707032
	ENSMUSG00000031592	-0.661296	5.10146	4.5168	0.0335636	0.707032
	ENSMUSG00000060459	1.33717	3.70984	4.51329	0.0336325	0.707032
	ENSMUSG00000039470	-0.804176	4.44086	4.50821	0.0337325	0.707032
	ENSMUSG00000037337	0.983577	5.29763	4.50604	0.0337753	0.707032
	ENSMUSG00000030465	0.476007	5.95796	4.50044	0.033886	0.707032
	ENSMUSG00000032249	-0.596129	4.68263	4.49807	0.0339331	0.707032
	ENSMUSG00000028243	-0.555394	6.22803	4.49464	0.0340012	0.707032
	ENSMUSG00000004207	0.616742	13.1755	4.49281	0.0340377	0.707032
	ENSMUSG00000020122	0.466016	7.09941	4.49063	0.0340811	0.707032
	ENSMUSG00000060923	-0.73804	6.73544	4.48607	0.0341722	0.707032
	ENSMUSG00000046561	0.807063	4.37971	4.48477	0.0341982	0.707032
	ENSMUSG00000060216	0.542849	7.49189	4.48462	0.0342012	0.707032
	ENSMUSG00000024511	-0.795616	5.08467	4.47532	0.0343877	0.707032
	ENSMUSG00000020592	0.882506	6.27794	4.4749	0.0343961	0.707032
	ENSMUSG00000030002	-0.819281	3.9741	4.47206	0.0344533	0.707032
	ENSMUSG00000016756	0.609253	6.75213	4.46773	0.0345409	0.707032
	ENSMUSG00000026709	-0.474118	5.67192	4.4547	0.0348053	0.707032
	ENSMUSG00000053581	0.432656	8.61389	4.45138	0.0348731	0.707032
	ENSMUSG00000032217	0.542204	5.13973	4.44731	0.0349563	0.707032
	ENSMUSG00000038250	-0.364076	8.02431	4.44546	0.0349941	0.707032
	ENSMUSG00000051735	0.82096	5.78906	4.44073	0.0350912	0.707032
	ENSMUSG00000023915	0.585996	7.07925	4.43505	0.0352081	0.707032
	ENSMUSG00000020415	0.857339	4.38316	4.42468	0.0354228	0.707032
	ENSMUSG00000029063	-0.449731	6.80342	4.42368	0.0354435	0.707032
	ENSMUSG00000032220	0.934481	6.99419	4.41331	0.0356597	0.707032
	ENSMUSG00000034586	0.65647	4.69563	4.41304	0.0356652	0.707032
	ENSMUSG00000058818	0.663437	6.17888	4.411	0.0357078	0.707032
	ENSMUSG00000040370	-0.497547	7.91791	4.40953	0.0357387	0.707032
	ENSMUSG00000042826	-0.922848	4.31983	4.40555	0.0358221	0.707032
	ENSMUSG00000042761	-0.787288	5.01563	4.40128	0.0359121	0.707032
	ENSMUSG00000028975	-0.628869	5.69903	4.40086	0.0359209	0.707032
	ENSMUSG00000026792	-0.922141	3.76773	4.39219	0.0361038	0.707032
	ENSMUSG00000030424	-0.773417	4.21784	4.38893	0.036173	0.707032
	ENSMUSG00000015947	1.16606	4.35711	4.38442	0.0362688	0.707032
	ENSMUSG00000029919	1.26894	5.58499	4.37873	0.03639	0.707032
	ENSMUSG00000037896	-0.757774	3.96329	4.37694	0.0364283	0.707032
	ENSMUSG00000092417	0.597345	4.59774	4.37017	0.0365734	0.707032
	ENSMUSG00000026664	-0.627013	6.17944	4.36679	0.036646	0.707032
	ENSMUSG00000054951	0.749986	4.05105	4.36471	0.0366908	0.707032
	ENSMUSG00000010608	-0.581352	6.01232	4.3641	0.0367038	0.707032
	ENSMUSG00000041747	0.47986	6.43262	4.3584	0.0368268	0.707032
	ENSMUSG00000001942	-0.740906	4.58597	4.35754	0.0368454	0.707032
	ENSMUSG00000000489	0.776187	4.96221	4.34874	0.0370363	0.707032
	ENSMUSG00000020598	0.979985	5.514	4.34462	0.0371261	0.707032
	ENSMUSG00000024621	0.569857	8.31945	4.33996	0.0372279	0.707032
	ENSMUSG00000048334	-0.48784	6.72073	4.33132	0.0374172	0.707032
	ENSMUSG00000026678	-0.629269	7.59968	4.33132	0.0374173	0.707032
	ENSMUSG00000051177	-0.604427	6.59865	4.30661	0.0379645	0.707032
	ENSMUSG00000051978	0.65416	4.57079	4.30622	0.0379733	0.707032
	ENSMUSG00000032020	0.798591	5.24627	4.30063	0.0380984	0.707032
	ENSMUSG00000024371	-0.669075	6.43042	4.29702	0.0381791	0.707032
	ENSMUSG00000037278	0.682802	4.43675	4.29636	0.0381941	0.707032
	ENSMUSG00000027852	0.741453	4.26715	4.29264	0.0382776	0.707032
	ENSMUSG00000026197	0.459324	5.29467	4.29141	0.0383054	0.707032
	ENSMUSG00000028962	0.478786	6.04774	4.28113	0.0385377	0.708732
	ENSMUSG00000052296	0.524517	6.58028	4.26603	0.0388817	0.712469
	ENSMUSG00000025473	1.64875	6.14547	4.25733	0.0390813	0.713541
	ENSMUSG00000078700	0.58499	4.80361	4.24794	0.039298	0.714917
	ENSMUSG00000056529	0.792045	9.54125	4.22924	0.0397331	0.717374
	ENSMUSG00000043279	-0.424219	6.37065	4.21879	0.0399787	0.717374
	ENSMUSG00000075040	0.760195	4.28258	4.21358	0.0401016	0.717374
	ENSMUSG00000060093	0.776387	5.59251	4.20167	0.0403842	0.717374
	ENSMUSG00000081723	0.971987	5.59546	4.199	0.0404478	0.717374
	ENSMUSG00000023959	-0.693005	6.97394	4.19276	0.040597	0.717374
	ENSMUSG00000026064	-0.52537	8.85706	4.19148	0.0406277	0.717374
	ENSMUSG00000039473	0.377114	6.81301	4.18558	0.0407692	0.717374
	ENSMUSG00000068114	0.476055	5.65805	4.18335	0.040823	0.717374
	ENSMUSG00000059309	0.592072	5.91374	4.17536	0.0410158	0.717374
	ENSMUSG00000041028	-0.451753	9.03094	4.15894	0.0414154	0.717374
	ENSMUSG00000025078	-0.768623	3.98354	4.14491	0.04176	0.717374
	ENSMUSG00000000340	-0.801594	6.4393	4.1437	0.0417899	0.717374
	ENSMUSG00000036106	-0.541219	6.45452	4.1283	0.0421717	0.717374
	ENSMUSG00000034120	0.39373	7.73241	4.1236	0.0422889	0.717374
	ENSMUSG00000039607	-0.469881	8.9473	4.12228	0.0423221	0.717374
	ENSMUSG00000090145	-0.753897	5.12964	4.11765	0.0424379	0.717374
	ENSMUSG00000020755	0.46778	5.06536	4.11484	0.0425085	0.717374
	ENSMUSG00000063406	-0.827798	8.35951	4.11275	0.042561	0.717374
	ENSMUSG00000033350	-0.839981	6.42352	4.10989	0.042633	0.717374
	ENSMUSG00000001062	0.615359	4.57082	4.10939	0.0426459	0.717374
	ENSMUSG00000029050	-0.456893	6.98553	4.10872	0.0426627	0.717374
	ENSMUSG00000030275	-0.297445	9.49413	4.10405	0.0427807	0.717374
	ENSMUSG00000039126	-1.00469	5.122	4.10181	0.0428374	0.717374
	ENSMUSG00000020272	0.377336	6.72101	4.0927	0.0430689	0.71887
	ENSMUSG00000086513	0.710987	4.39587	4.05983	0.043915	0.727971
	ENSMUSG00000024795	0.875785	3.94065	4.05424	0.0440605	0.727971
	ENSMUSG00000037370	0.973513	4.74847	4.048	0.0442238	0.727971
	ENSMUSG00000041231	-0.849518	3.64132	4.04247	0.0443687	0.727971
	ENSMUSG00000029823	-0.506381	6.22286	4.02802	0.0447505	0.727971
	ENSMUSG00000063146	0.468451	6.85359	4.02798	0.0447514	0.727971
	ENSMUSG00000043051	0.72153	3.9645	4.02795	0.0447522	0.727971
	ENSMUSG00000061132	1.10042	4.57743	4.01791	0.0450194	0.727971
	ENSMUSG00000040613	1.03579	7.80994	4.0169	0.0450466	0.727971
	ENSMUSG00000004591	-0.680022	5.96815	4.01481	0.0451023	0.727971
	ENSMUSG00000017466	0.626312	7.67287	4.01125	0.0451975	0.727971
	ENSMUSG00000024759	-0.528855	5.88726	3.96879	0.0463511	0.734048
	ENSMUSG00000028565	-0.567101	7.45783	3.96193	0.0465404	0.734048
	ENSMUSG00000036112	-0.325929	7.16872	3.96183	0.0465431	0.734048
	ENSMUSG00000090124	0.769579	4.56997	3.95366	0.0467697	0.734048
	ENSMUSG00000055435	-1.01287	4.95567	3.95011	0.0468682	0.734048
	ENSMUSG00000036560	0.767123	4.72404	3.9476	0.0469382	0.734048
	ENSMUSG00000014226	-0.848609	5.21912	3.94455	0.0470235	0.734048
	ENSMUSG00000042406	0.401485	7.34598	3.94201	0.0470944	0.734048
	ENSMUSG00000028850	0.475351	5.52208	3.93912	0.0471754	0.734048
	ENSMUSG00000032827	-0.631769	5.57906	3.93264	0.0473576	0.734048
	ENSMUSG00000024013	0.540552	6.18565	3.93223	0.0473691	0.734048
	ENSMUSG00000035459	1.35194	5.9288	3.92919	0.0474547	0.734048
	ENSMUSG00000038695	0.512218	5.76199	3.92891	0.0474628	0.734048
	ENSMUSG00000041199	-0.904862	4.0299	3.92381	0.0476068	0.734048
	ENSMUSG00000050103	-0.492182	6.89155	3.90823	0.0480502	0.738634
	ENSMUSG00000031443	1.50252	5.39108	3.90294	0.0482018	0.738718
	ENSMUSG00000027559	-0.820459	15.8918	3.88356	0.0487611	0.741847
	ENSMUSG00000025135	0.331343	6.73872	3.88329	0.0487688	0.741847
	ENSMUSG00000026839	0.978237	4.95722	3.88064	0.048846	0.741847
	ENSMUSG00000026674	0.482813	5.79909	3.8664	0.0492621	0.74258
	ENSMUSG00000000346	0.454396	6.58425	3.86081	0.0494264	0.74258
	ENSMUSG00000030172	-0.441389	7.44402	3.86053	0.0494348	0.74258
	ENSMUSG00000049624	0.506197	6.15374	3.85751	0.0495238	0.74258
	ENSMUSG00000040268	0.588846	4.58986	3.85397	0.0496285	0.74258
	ENSMUSG00000024781	0.909013	10.8479	3.83752	0.0501177	0.747464
	ENSMUSG00000028896	0.555257	5.28633	3.83308	0.0502504	0.747464
	ENSMUSG00000036863	-0.987944	3.72559	3.82462	0.0505049	0.748931
	ENSMUSG00000069273	0.61446	5.45858	3.81865	0.050685	0.748931
	ENSMUSG00000020897	0.903128	3.69292	3.81106	0.0509152	0.748931
	ENSMUSG00000021711	-0.346155	7.95515	3.80588	0.0510729	0.748931
	ENSMUSG00000038943	0.931577	5.56725	3.79254	0.0514815	0.748931
	ENSMUSG00000081534	0.393993	6.33543	3.79001	0.0515594	0.748931
	ENSMUSG00000085519	-1.37604	4.07753	3.78843	0.0516082	0.748931
	ENSMUSG00000004698	-0.593799	6.10447	3.78317	0.0517705	0.748931
	ENSMUSG00000027195	-0.7399	7.9985	3.78033	0.0518585	0.748931
	ENSMUSG00000054499	0.569296	5.40633	3.77298	0.0520868	0.748931
	ENSMUSG00000030560	-0.577591	6.61686	3.77248	0.0521023	0.748931
	ENSMUSG00000006715	0.838561	4.19883	3.76447	0.0523525	0.748931
	ENSMUSG00000003355	0.785652	3.91564	3.76394	0.0523689	0.748931
	ENSMUSG00000024810	-1.02348	5.9116	3.76104	0.0524599	0.748931
	ENSMUSG00000040751	1.30711	3.93434	3.75753	0.0525703	0.748931
	ENSMUSG00000042628	0.401983	7.65323	3.74872	0.052848	0.750771
	ENSMUSG00000036391	-0.42726	7.10258	3.74229	0.0530516	0.751553
	ENSMUSG00000074785	0.726846	6.19549	3.7342	0.0533091	0.752232
	ENSMUSG00000074802	1.03823	6.40192	3.7269	0.0535428	0.752232
	ENSMUSG00000026273	-0.446236	5.21991	3.7196	0.0537774	0.752232
	ENSMUSG00000073468	0.656254	5.20158	3.71256	0.0540047	0.752232
	ENSMUSG00000064043	0.800151	3.97737	3.70997	0.0540884	0.752232
	ENSMUSG00000023286	0.390681	6.35167	3.70318	0.0543088	0.752232
	ENSMUSG00000081436	0.421498	6.36565	3.69909	0.0544422	0.752232
	ENSMUSG00000029468	0.614214	7.16316	3.69639	0.0545302	0.752232
	ENSMUSG00000056069	0.680004	6.67221	3.68838	0.0547928	0.752232
	ENSMUSG00000031662	1.0203	4.10308	3.68726	0.0548296	0.752232
	ENSMUSG00000053838	0.37883	6.62021	3.68329	0.0549602	0.752232
	ENSMUSG00000014195	0.437947	6.17038	3.68185	0.0550076	0.752232
	ENSMUSG00000030978	0.368234	7.09635	3.67594	0.055203	0.752232
	ENSMUSG00000015474	-0.484162	5.26165	3.66977	0.0554079	0.752232
	ENSMUSG00000030577	1.29021	4.68222	3.66302	0.0556328	0.752232
	ENSMUSG00000027947	0.71092	4.90456	3.66031	0.0557232	0.752232
	ENSMUSG00000032782	0.697606	4.35921	3.65888	0.0557713	0.752232
	ENSMUSG00000096945	0.8518	3.9209	3.65871	0.0557768	0.752232
	ENSMUSG00000078780	1.47557	4.87536	3.62563	0.0568962	0.758002
	ENSMUSG00000048578	-0.348798	8.95324	3.617	0.057192	0.758002
	ENSMUSG00000079614	-0.591364	5.47287	3.60928	0.057458	0.758002
	ENSMUSG00000029014	0.518657	5.07005	3.60028	0.05777	0.758002
	ENSMUSG00000047153	0.842453	3.63226	3.59631	0.0579081	0.758002
	ENSMUSG00000033705	0.443781	8.80963	3.59066	0.058105	0.758002
	ENSMUSG00000048379	-0.460712	6.83368	3.58608	0.0582654	0.758002
	ENSMUSG00000022404	-0.430758	6.73134	3.58368	0.0583496	0.758002
	ENSMUSG00000036995	0.569013	5.06238	3.58238	0.0583954	0.758002
	ENSMUSG00000021182	0.718202	5.49009	3.5771	0.0585812	0.758002
	ENSMUSG00000030609	-0.654769	4.83972	3.57623	0.0586121	0.758002
	ENSMUSG00000040322	0.387783	7.95798	3.57572	0.0586299	0.758002
	ENSMUSG00000018819	0.758937	6.14492	3.57521	0.058648	0.758002
	ENSMUSG00000037531	-0.576268	4.6176	3.56907	0.0588652	0.758002
	ENSMUSG00000026203	-0.614502	5.56831	3.56801	0.0589028	0.758002
	ENSMUSG00000030421	-0.816534	3.75263	3.56682	0.0589451	0.758002
	ENSMUSG00000038648	-0.537253	5.51554	3.56543	0.0589944	0.758002
	ENSMUSG00000017776	-0.352422	7.61435	3.56282	0.0590874	0.758002
	ENSMUSG00000009545	0.8255	3.75489	3.56226	0.0591072	0.758002
	ENSMUSG00000026333	-0.687382	4.00422	3.55873	0.059233	0.758002
	ENSMUSG00000011958	0.398424	6.93637	3.5541	0.0593985	0.758002
	ENSMUSG00000042772	-0.349152	7.50252	3.55121	0.059502	0.758002
	ENSMUSG00000024603	-0.326336	7.16165	3.54372	0.0597714	0.759521
	ENSMUSG00000051469	-0.467843	4.92434	3.52567	0.0604253	0.763391
	ENSMUSG00000001383	-0.339383	6.68509	3.52434	0.0604741	0.763391
	ENSMUSG00000029234	0.409956	7.46132	3.52284	0.0605288	0.763391
	ENSMUSG00000022641	-0.598632	5.66179	3.51719	0.0607355	0.764092
	ENSMUSG00000073599	-0.693391	4.29746	3.50723	0.0611015	0.766173
	ENSMUSG00000001467	-0.575111	7.86542	3.50339	0.0612434	0.766173
	ENSMUSG00000061130	-0.506604	4.94331	3.50036	0.0613554	0.766173
	ENSMUSG00000033813	-0.499864	5.27503	3.48557	0.0619062	0.766375
	ENSMUSG00000040667	0.433696	6.13106	3.48478	0.0619355	0.766375
	ENSMUSG00000043091	0.557756	6.53524	3.48387	0.0619695	0.766375
	ENSMUSG00000027167	-0.533872	5.12503	3.47997	0.0621157	0.766375
	ENSMUSG00000025586	-0.679741	4.48757	3.47962	0.0621292	0.766375
	ENSMUSG00000033970	0.432495	5.19892	3.4675	0.0625857	0.76831
	ENSMUSG00000057396	-0.763527	3.88343	3.46739	0.0625899	0.76831
	ENSMUSG00000015837	-0.314825	9.0527	3.45563	0.0630366	0.771415
	ENSMUSG00000029571	-0.35711	9.58182	3.4498	0.0632593	0.771415
	ENSMUSG00000052085	0.710362	8.37184	3.44514	0.0634382	0.771415
	ENSMUSG00000054517	0.637066	4.0014	3.4414	0.0635818	0.771415
	ENSMUSG00000028028	0.497722	7.63392	3.43303	0.0639047	0.771415
	ENSMUSG00000030126	0.473967	5.22155	3.43062	0.063998	0.771415
	ENSMUSG00000083219	-0.882327	13.2236	3.41831	0.0644771	0.771415
	ENSMUSG00000052560	-0.392589	6.49181	3.40951	0.0648215	0.771415
	ENSMUSG00000024481	-1.0267	5.12865	3.40675	0.0649303	0.771415
	ENSMUSG00000020901	1.04404	5.87951	3.40158	0.0651338	0.771415
	ENSMUSG00000038259	0.998421	3.66235	3.40097	0.0651582	0.771415
	ENSMUSG00000029456	-0.590767	4.98138	3.39851	0.0652555	0.771415
	ENSMUSG00000027001	-0.497842	5.61678	3.39103	0.0655519	0.771415
	ENSMUSG00000054021	-0.650605	4.9239	3.39043	0.065576	0.771415
	ENSMUSG00000024187	0.356958	8.56886	3.38893	0.0656355	0.771415
	ENSMUSG00000036256	0.586574	9.10585	3.38848	0.0656533	0.771415
	ENSMUSG00000031710	-3.53303	7.14075	3.38739	0.0656969	0.771415
	ENSMUSG00000064262	-0.714563	4.201	3.38587	0.0657576	0.771415
	ENSMUSG00000028874	0.937313	5.38234	3.37935	0.066018	0.771415
	ENSMUSG00000028709	0.762242	3.776	3.37383	0.0662395	0.771415
	ENSMUSG00000032089	0.682123	8.00982	3.37278	0.0662816	0.771415
	ENSMUSG00000033253	0.482217	5.11909	3.37009	0.0663901	0.771415
	ENSMUSG00000004056	-0.562635	7.41775	3.36954	0.0664124	0.771415
	ENSMUSG00000024456	0.404086	6.90911	3.3624	0.0667007	0.771415
	ENSMUSG00000078942	0.820709	3.65174	3.35732	0.066907	0.771415
	ENSMUSG00000028475	0.477852	5.60142	3.35157	0.0671411	0.771415
	ENSMUSG00000026596	0.750863	3.99619	3.34863	0.0672612	0.771415
	ENSMUSG00000030022	-0.475108	8.08752	3.34367	0.0674638	0.771415
	ENSMUSG00000001020	1.03064	5.15491	3.34221	0.0675237	0.771415
	ENSMUSG00000025314	0.504735	7.85722	3.33976	0.0676245	0.771415
	ENSMUSG00000019302	0.499493	7.3848	3.33944	0.0676375	0.771415
	ENSMUSG00000021136	-0.481742	8.36879	3.33518	0.0678132	0.771415
	ENSMUSG00000069274	0.768578	6.77445	3.33299	0.0679033	0.771415
	ENSMUSG00000020170	0.528383	5.96542	3.32688	0.068156	0.771415
	ENSMUSG00000033557	-0.492575	6.00115	3.32627	0.0681815	0.771415
	ENSMUSG00000026158	-0.851365	3.70176	3.31991	0.0684458	0.772677
	ENSMUSG00000079227	0.740312	8.06883	3.3106	0.0688345	0.775334
	ENSMUSG00000021226	-0.626428	6.24909	3.29968	0.0692934	0.777342
	ENSMUSG00000036503	-0.382076	8.70728	3.29599	0.0694492	0.777342
	ENSMUSG00000031444	1.13622	5.69221	3.29472	0.069503	0.777342
	ENSMUSG00000039168	0.321782	7.84332	3.27908	0.0701681	0.777342
	ENSMUSG00000022940	-0.43012	6.96994	3.27597	0.0703016	0.777342
	ENSMUSG00000061482	0.410841	9.02219	3.27407	0.0703829	0.777342
	ENSMUSG00000033849	-0.665147	9.12117	3.26255	0.0708789	0.777342
	ENSMUSG00000023828	-0.474696	6.61462	3.26173	0.0709142	0.777342
	ENSMUSG00000044792	-0.376553	7.61367	3.25977	0.0709989	0.777342
	ENSMUSG00000043090	0.600455	4.95134	3.25971	0.0710018	0.777342
	ENSMUSG00000043411	0.40163	6.65515	3.25766	0.0710903	0.777342
	ENSMUSG00000015027	0.486268	6.74082	3.25421	0.0712401	0.777342
	ENSMUSG00000030704	-0.670056	4.64256	3.25289	0.0712976	0.777342
	ENSMUSG00000024483	0.740434	5.07864	3.25215	0.07133	0.777342
	ENSMUSG00000001270	0.923028	6.34555	3.25189	0.0713411	0.777342
	ENSMUSG00000004500	0.526082	4.41063	3.24679	0.0715636	0.777342
	ENSMUSG00000067736	-0.928866	4.81828	3.24325	0.0717181	0.777342
	ENSMUSG00000024276	-0.754957	4.19398	3.24185	0.0717794	0.777342
	ENSMUSG00000023960	-0.46622	6.07602	3.23666	0.0720073	0.777621
	ENSMUSG00000036585	-0.559735	10.1257	3.23313	0.0721625	0.777621
	ENSMUSG00000038217	-0.681313	5.00553	3.23078	0.0722665	0.777621
	ENSMUSG00000035851	-0.52739	6.13466	3.22215	0.072648	0.778769
	ENSMUSG00000037416	-0.392747	6.58012	3.20815	0.0732721	0.778769
	ENSMUSG00000066842	0.770715	7.39109	3.19483	0.0738715	0.778769
	ENSMUSG00000020707	0.438557	5.35255	3.19473	0.0738761	0.778769
	ENSMUSG00000040618	0.603276	6.35907	3.19217	0.0739917	0.778769
	ENSMUSG00000041346	0.532697	4.70221	3.18688	0.0742315	0.778769
	ENSMUSG00000002083	0.805874	4.39557	3.1842	0.0743535	0.778769
	ENSMUSG00000081833	0.911642	3.89131	3.17908	0.0745865	0.778769
	ENSMUSG00000026504	0.466577	5.65461	3.17275	0.0748764	0.778769
	ENSMUSG00000038252	0.525369	5.57236	3.17067	0.0749718	0.778769
	ENSMUSG00000002031	0.520949	5.4438	3.16525	0.0752209	0.778769
	ENSMUSG00000029072	0.826606	3.9062	3.16262	0.0753423	0.778769
	ENSMUSG00000047507	1.08901	3.97332	3.16055	0.0754379	0.778769
	ENSMUSG00000044405	-0.583454	8.7399	3.15999	0.0754639	0.778769
	ENSMUSG00000069270	0.771784	5.76444	3.15448	0.0757189	0.778769
	ENSMUSG00000021134	-0.574454	7.46269	3.15425	0.0757293	0.778769
	ENSMUSG00000018293	0.341123	8.27786	3.15083	0.0758884	0.778769
	ENSMUSG00000018401	-0.758807	3.90598	3.15007	0.0759237	0.778769
	ENSMUSG00000048779	0.679257	4.86331	3.14936	0.0759566	0.778769
	ENSMUSG00000030536	0.41197	9.62991	3.14788	0.0760256	0.778769
	ENSMUSG00000000693	0.585874	5.00197	3.14457	0.0761798	0.778769
	ENSMUSG00000039879	-0.412596	6.94011	3.13921	0.076431	0.778769
	ENSMUSG00000015749	-0.39323	6.0695	3.13786	0.0764941	0.778769
	ENSMUSG00000036046	0.507988	8.89683	3.12991	0.076868	0.778769
	ENSMUSG00000020528	-0.679248	4.02537	3.12908	0.0769069	0.778769
	ENSMUSG00000020423	-1.01697	5.59435	3.12699	0.077006	0.778769
	ENSMUSG00000026357	0.969519	4.66539	3.12683	0.0770133	0.778769
	ENSMUSG00000011114	-0.392915	5.43346	3.12647	0.0770305	0.778769
	ENSMUSG00000024312	0.492201	5.36848	3.12037	0.077319	0.778769
	ENSMUSG00000018572	0.406997	5.80133	3.11962	0.0773549	0.778769
	ENSMUSG00000006941	-0.351027	6.11007	3.11595	0.0775291	0.778769
	ENSMUSG00000004040	-0.298541	8.16534	3.10882	0.0778695	0.778769
	ENSMUSG00000020922	-0.477543	7.10203	3.10512	0.0780464	0.778769
	ENSMUSG00000019990	-0.661615	4.58425	3.10077	0.0782552	0.778769
	ENSMUSG00000052760	0.874144	3.84731	3.09721	0.0784268	0.778769
	ENSMUSG00000038235	-0.378375	7.49711	3.0963	0.0784702	0.778769
	ENSMUSG00000028459	1.0011	4.90855	3.09023	0.0787635	0.778769
	ENSMUSG00000056121	-0.388768	6.66582	3.08734	0.0789037	0.778769
	ENSMUSG00000020700	0.562284	4.23121	3.0806	0.0792311	0.778769
	ENSMUSG00000046230	-0.425769	8.34432	3.07824	0.0793461	0.778769
	ENSMUSG00000042787	0.519074	5.12602	3.07661	0.079426	0.778769
	ENSMUSG00000026600	0.804385	6.69772	3.07381	0.0795627	0.778769
	ENSMUSG00000025016	-0.485847	7.44635	3.073	0.0796022	0.778769
	ENSMUSG00000034801	-0.433186	5.96763	3.07038	0.0797306	0.778769
	ENSMUSG00000032076	0.953942	6.30757	3.0642	0.0800346	0.778769
	ENSMUSG00000027184	-0.438127	6.73488	3.06306	0.0800908	0.778769
	ENSMUSG00000021643	-0.648928	4.93375	3.05423	0.0805269	0.778769
	ENSMUSG00000036298	-0.972009	4.74072	3.05141	0.080667	0.778769
	ENSMUSG00000021028	-0.532059	4.79221	3.04743	0.0808652	0.778769
	ENSMUSG00000028701	-1.04238	3.76003	3.04575	0.0809489	0.778769
	ENSMUSG00000027204	0.682867	7.88806	3.04318	0.081077	0.778769
	ENSMUSG00000042055	0.687852	3.85139	3.04264	0.0811038	0.778769
	ENSMUSG00000064168	0.864807	4.69879	3.04126	0.0811729	0.778769
	ENSMUSG00000020130	-0.315335	7.43125	3.03935	0.0812685	0.778769
	ENSMUSG00000027068	1.01108	6.40826	3.03796	0.0813381	0.778769
	ENSMUSG00000026622	0.843517	4.32594	3.03466	0.0815035	0.778769
	ENSMUSG00000029833	-0.555888	4.75267	3.02913	0.0817821	0.778769
	ENSMUSG00000074220	0.46969	4.52707	3.02448	0.0820168	0.778769
	ENSMUSG00000044349	-0.892668	7.56761	3.02121	0.0821821	0.778769
	ENSMUSG00000071379	0.433086	7.59403	3.02082	0.0822021	0.778769
	ENSMUSG00000000318	0.731845	8.88551	3.01538	0.0824781	0.778769
	ENSMUSG00000027304	0.328679	6.66649	3.01406	0.0825455	0.778769
	ENSMUSG00000034252	-0.52792	5.41533	3.01402	0.0825473	0.778769
	ENSMUSG00000018909	0.308523	8.33901	3.01082	0.0827106	0.778769
	ENSMUSG00000025780	-0.515846	6.85684	3.00315	0.083103	0.778769
	ENSMUSG00000032040	0.501391	4.67824	3.00221	0.083151	0.778769
	ENSMUSG00000044768	0.46112	5.92255	2.99993	0.0832682	0.778769
	ENSMUSG00000027763	-0.820169	6.18541	2.99621	0.0834595	0.778769
	ENSMUSG00000022292	-0.439537	6.95642	2.99564	0.0834889	0.778769
	ENSMUSG00000027187	-0.47211	11.0136	2.99455	0.0835452	0.778769
	ENSMUSG00000020021	0.500405	5.46012	2.9913	0.0837129	0.778769
	ENSMUSG00000025102	-0.49694	5.07171	2.9901	0.0837748	0.778769
	ENSMUSG00000060128	-0.566484	5.13826	2.97915	0.0843438	0.778769
	ENSMUSG00000033417	0.423605	4.757	2.97641	0.0844862	0.778769
	ENSMUSG00000024259	-0.314652	8.20792	2.97394	0.0846155	0.778769
	ENSMUSG00000020828	0.323191	7.01522	2.96505	0.0850819	0.778769
	ENSMUSG00000004561	0.36585	5.94171	2.95661	0.0855268	0.778769
	ENSMUSG00000044968	-0.407797	6.89962	2.95461	0.0856332	0.778769
	ENSMUSG00000021484	-0.478043	6.28224	2.95451	0.085638	0.778769
	ENSMUSG00000024299	0.411077	6.21052	2.95077	0.0858366	0.778769
	ENSMUSG00000038663	-0.445513	7.80471	2.94213	0.0862971	0.778769
	ENSMUSG00000028312	0.508322	5.95761	2.93947	0.086439	0.778769
	ENSMUSG00000054150	0.452	7.10585	2.93933	0.0864468	0.778769
	ENSMUSG00000000378	0.710162	3.54891	2.93805	0.086515	0.778769
	ENSMUSG00000098206	0.768781	3.77048	2.93776	0.0865309	0.778769
	ENSMUSG00000030259	0.266932	8.31135	2.93751	0.0865442	0.778769
	ENSMUSG00000033540	0.62525	4.07148	2.92988	0.0869538	0.778769
	ENSMUSG00000063727	-1.26111	4.38082	2.92852	0.0870274	0.778769
	ENSMUSG00000027305	-0.351443	6.70689	2.92547	0.0871918	0.778769
	ENSMUSG00000033066	0.620103	7.46742	2.92528	0.0872019	0.778769
	ENSMUSG00000026341	0.428168	8.02593	2.92413	0.0872641	0.778769
	ENSMUSG00000074743	-0.935152	6.01523	2.92364	0.0872908	0.778769
	ENSMUSG00000037638	0.612664	4.52837	2.92225	0.0873657	0.778769
	ENSMUSG00000090698	-1.11703	7.60554	2.91693	0.0876545	0.778769
	ENSMUSG00000041729	0.541069	5.56981	2.90705	0.0881933	0.778769
	ENSMUSG00000024712	-0.326804	6.7269	2.90663	0.0882158	0.778769
	ENSMUSG00000049516	-0.639952	3.81346	2.90082	0.0885347	0.778769
	ENSMUSG00000063931	0.308871	8.07349	2.89262	0.0889864	0.778769
	ENSMUSG00000021268	0.552924	5.9821	2.89248	0.0889938	0.778769
	ENSMUSG00000074622	0.656535	6.73602	2.89062	0.0890967	0.778769
	ENSMUSG00000038147	1.22871	5.52423	2.89018	0.0891212	0.778769
	ENSMUSG00000095079	-1.38864	6.28218	2.88602	0.0893515	0.778769
	ENSMUSG00000026335	0.371789	11.0206	2.88539	0.0893864	0.778769
	ENSMUSG00000050587	-0.825657	3.77095	2.88253	0.0895452	0.778769
	ENSMUSG00000003948	-0.641494	11.7529	2.88009	0.0896808	0.778769
	ENSMUSG00000049539	0.853991	5.94804	2.87751	0.0898245	0.778769
	ENSMUSG00000022770	-0.476242	5.69163	2.87674	0.0898677	0.778769
	ENSMUSG00000063882	-0.314249	8.3874	2.87651	0.0898806	0.778769
	ENSMUSG00000031583	-0.490335	5.26437	2.87578	0.0899216	0.778769
	ENSMUSG00000020250	0.309489	7.05681	2.87111	0.0901826	0.778769
	ENSMUSG00000024560	0.555798	4.95341	2.86933	0.0902826	0.778769
	ENSMUSG00000024302	-0.916516	5.43307	2.86834	0.090338	0.778769
	ENSMUSG00000029416	0.401713	6.75054	2.86757	0.0903813	0.778769
	ENSMUSG00000028402	-0.274172	9.38784	2.86315	0.0906298	0.778769
	ENSMUSG00000097296	0.544698	6.12577	2.86293	0.090642	0.778769
	ENSMUSG00000040084	0.685719	5.19196	2.86212	0.0906878	0.778769
	ENSMUSG00000029674	0.523504	5.51243	2.86096	0.0907533	0.778769
	ENSMUSG00000033715	1.14854	6.2484	2.85501	0.0910895	0.778769
	ENSMUSG00000036167	-0.319331	7.34257	2.85448	0.0911197	0.778769
	ENSMUSG00000070709	-0.517239	4.63481	2.85248	0.0912329	0.778769
	ENSMUSG00000030282	0.318053	7.09646	2.84714	0.0915369	0.778769
	ENSMUSG00000008475	0.436497	9.24146	2.84648	0.0915741	0.778769
	ENSMUSG00000040061	0.664997	4.92665	2.84272	0.0917887	0.778769
	ENSMUSG00000095788	1.21194	4.20467	2.83874	0.0920166	0.778769
	ENSMUSG00000024817	0.403365	6.85362	2.83392	0.092293	0.778769
	ENSMUSG00000020053	-0.626242	7.06036	2.82538	0.0927851	0.778769
	ENSMUSG00000021670	0.436403	6.03295	2.82506	0.0928034	0.778769
	ENSMUSG00000040699	0.357632	6.39541	2.82111	0.0930319	0.778769
	ENSMUSG00000078234	-0.796791	4.4945	2.82065	0.0930588	0.778769
	ENSMUSG00000035671	0.49048	6.34581	2.81636	0.0933078	0.778769
	ENSMUSG00000028413	0.456787	4.95578	2.81404	0.0934428	0.778769
	ENSMUSG00000042380	-0.364633	5.47038	2.81251	0.0935318	0.778769
	ENSMUSG00000006585	0.670272	4.90298	2.8106	0.0936434	0.778769
	ENSMUSG00000066637	-0.403874	5.24799	2.80977	0.0936916	0.778769
	ENSMUSG00000083076	-0.775327	10.8384	2.80883	0.0937467	0.778769
	ENSMUSG00000028270	-0.416828	8.8198	2.80865	0.0937575	0.778769
	ENSMUSG00000026687	-0.56297	5.18008	2.80862	0.0937588	0.778769
	ENSMUSG00000023942	0.568964	5.54528	2.80847	0.0937677	0.778769
	ENSMUSG00000058385	0.713119	6.48964	2.80272	0.0941048	0.778769
	ENSMUSG00000060373	-0.413929	6.87973	2.80179	0.094159	0.778769
	ENSMUSG00000013997	-0.772068	3.58013	2.79959	0.0942883	0.778769
	ENSMUSG00000015112	0.867779	4.96591	2.79905	0.0943203	0.778769
	ENSMUSG00000027882	0.512916	4.97039	2.79781	0.094393	0.778769
	ENSMUSG00000015355	0.849659	5.47831	2.79132	0.0947761	0.780053
	ENSMUSG00000001674	0.380409	6.00242	2.78995	0.0948572	0.780053
	ENSMUSG00000066245	0.397369	7.5453	2.78524	0.0951366	0.78047
	ENSMUSG00000008226	-0.366321	5.75261	2.78389	0.0952165	0.78047
	ENSMUSG00000030671	-0.459743	10.4169	2.78129	0.0953714	0.780475
	ENSMUSG00000055632	-0.717593	7.58493	2.77748	0.0955987	0.781071
	ENSMUSG00000059901	0.689937	4.7189	2.77479	0.0957595	0.781123
	ENSMUSG00000029267	-0.772272	4.09272	2.7671	0.0962205	0.78342
	ENSMUSG00000029648	-0.506225	5.30796	2.76493	0.0963509	0.78342
	ENSMUSG00000035621	-0.880576	3.58763	2.75797	0.0967713	0.78476
	ENSMUSG00000028532	-0.559886	6.30934	2.75706	0.0968261	0.78476
	ENSMUSG00000094947	0.746242	4.48006	2.7504	0.0972302	0.784794
	ENSMUSG00000020077	0.424966	6.71196	2.7499	0.0972603	0.784794
	ENSMUSG00000068917	0.468777	5.35856	2.74804	0.0973737	0.784794
	ENSMUSG00000028035	-0.458838	7.28817	2.74677	0.0974509	0.784794
	ENSMUSG00000021510	-0.411549	5.55757	2.73925	0.0979107	0.7868
	ENSMUSG00000020865	0.472072	7.00129	2.73623	0.098096	0.7868
	ENSMUSG00000038080	-0.541781	5.49102	2.73098	0.0984188	0.7868
	ENSMUSG00000018326	-0.378852	9.1133	2.73093	0.0984219	0.7868
	ENSMUSG00000020413	-0.643978	3.81999	2.72806	0.0985989	0.7868
	ENSMUSG00000004980	0.290686	7.32848	2.7275	0.0986334	0.7868
	ENSMUSG00000021270	-0.385944	8.2899	2.72307	0.0989076	0.787744
	ENSMUSG00000024218	-0.441801	5.04919	2.71373	0.0994878	0.79112
	ENSMUSG00000030521	0.417275	5.31279	2.70148	0.100255	0.793361
	ENSMUSG00000036093	-0.42584	6.36951	2.69935	0.100389	0.793361
	ENSMUSG00000028906	0.362463	7.61561	2.6958	0.100613	0.793361
	ENSMUSG00000043962	-0.44983	4.9816	2.69094	0.10092	0.793361
	ENSMUSG00000020546	-0.548914	4.99354	2.68191	0.101494	0.793361
	ENSMUSG00000060002	-0.516643	11.5394	2.67856	0.101708	0.793361
	ENSMUSG00000022899	-0.83046	3.9962	2.67591	0.101877	0.793361
	ENSMUSG00000018209	-0.427093	5.05384	2.6742	0.101987	0.793361
	ENSMUSG00000046223	0.750042	4.81275	2.67236	0.102105	0.793361
	ENSMUSG00000043858	0.415796	5.39594	2.67179	0.102141	0.793361
	ENSMUSG00000042997	0.359194	7.23782	2.67139	0.102167	0.793361
	ENSMUSG00000026482	-0.311378	8.93881	2.67004	0.102253	0.793361
	ENSMUSG00000070565	0.646317	4.19869	2.66841	0.102358	0.793361
	ENSMUSG00000025465	-0.496319	7.36167	2.66691	0.102455	0.793361
	ENSMUSG00000037544	1.16817	3.89891	2.66408	0.102637	0.793361
	ENSMUSG00000026283	0.413935	5.25831	2.6631	0.1027	0.793361
	ENSMUSG00000079277	-1.10166	3.86884	2.66211	0.102765	0.793361
	ENSMUSG00000029003	0.423931	5.15933	2.66077	0.102851	0.793361
	ENSMUSG00000097379	-0.79018	3.85072	2.65915	0.102956	0.793361
	ENSMUSG00000028047	0.816453	5.09537	2.65495	0.103228	0.793361
	ENSMUSG00000033430	-0.57502	4.64049	2.64571	0.10383	0.793361
	ENSMUSG00000051346	-0.475421	5.40552	2.64374	0.103958	0.793361
	ENSMUSG00000028832	0.710025	5.24966	2.64255	0.104036	0.793361
	ENSMUSG00000098148	-0.639978	4.03983	2.63488	0.10454	0.793361
	ENSMUSG00000073563	0.482009	4.54289	2.63397	0.1046	0.793361
	ENSMUSG00000035085	-0.830903	4.30132	2.63293	0.104668	0.793361
	ENSMUSG00000001123	0.443209	5.43598	2.63165	0.104753	0.793361
	ENSMUSG00000066000	-0.438245	5.6764	2.63113	0.104787	0.793361
	ENSMUSG00000014303	0.653068	4.86981	2.62915	0.104918	0.793361
	ENSMUSG00000038002	0.40528	6.50894	2.61798	0.105659	0.793361
	ENSMUSG00000090083	0.499858	4.71152	2.61697	0.105726	0.793361
	ENSMUSG00000093930	-0.476302	11.3725	2.61268	0.106012	0.793361
	ENSMUSG00000022159	-0.3521	5.81964	2.61194	0.106062	0.793361
	ENSMUSG00000026548	0.679939	5.51719	2.60915	0.106248	0.793361
	ENSMUSG00000030291	-0.385422	6.1178	2.60912	0.106251	0.793361
	ENSMUSG00000012187	-0.808865	4.87853	2.60878	0.106274	0.793361
	ENSMUSG00000024030	0.563332	8.52225	2.6078	0.106339	0.793361
	ENSMUSG00000055013	0.549263	5.39951	2.60054	0.106827	0.793361
	ENSMUSG00000047714	-0.253895	8.64287	2.60002	0.106863	0.793361
	ENSMUSG00000044308	-0.440163	5.36389	2.59712	0.107058	0.793361
	ENSMUSG00000033364	-0.349077	5.91111	2.59645	0.107103	0.793361
	ENSMUSG00000021701	0.406729	7.58402	2.5952	0.107188	0.793361
	ENSMUSG00000000631	0.366519	6.11198	2.59359	0.107297	0.793361
	ENSMUSG00000074677	1.1153	4.84946	2.59296	0.10734	0.793361
	ENSMUSG00000030720	0.571096	4.60236	2.59178	0.10742	0.793361
	ENSMUSG00000034321	-0.348446	5.66242	2.58816	0.107665	0.793361
	ENSMUSG00000032766	0.555315	4.09037	2.58813	0.107667	0.793361
	ENSMUSG00000037353	-0.613356	6.3851	2.58697	0.107746	0.793361
	ENSMUSG00000029695	1.18291	5.46821	2.58644	0.107782	0.793361
	ENSMUSG00000050555	0.632617	4.13775	2.58607	0.107808	0.793361
	ENSMUSG00000031517	-0.973285	4.94405	2.58372	0.107968	0.793361
	ENSMUSG00000051627	-0.496915	7.52935	2.58324	0.108	0.793361
	ENSMUSG00000026627	0.714493	4.03416	2.58202	0.108084	0.793361
	ENSMUSG00000022890	-0.313686	7.92146	2.57595	0.108499	0.795252
	ENSMUSG00000019373	-0.379649	6.22699	2.56904	0.108974	0.796115
	ENSMUSG00000038046	-0.521114	5.28177	2.56682	0.109127	0.796115
	ENSMUSG00000005481	0.365372	5.20061	2.5666	0.109142	0.796115
	ENSMUSG00000087700	0.714695	4.23606	2.56509	0.109247	0.796115
	ENSMUSG00000006395	0.43109	6.0763	2.56282	0.109404	0.796115
	ENSMUSG00000006262	-0.357841	6.7775	2.558	0.109737	0.796288
	ENSMUSG00000022747	-0.432171	7.12129	2.5564	0.109848	0.796288
	ENSMUSG00000038119	-0.41161	7.8167	2.55566	0.1099	0.796288
	ENSMUSG00000021676	0.59737	6.10564	2.54976	0.110311	0.798127
	ENSMUSG00000040345	0.764036	5.42601	2.54671	0.110524	0.798526
	ENSMUSG00000030323	-0.606648	4.931	2.5427	0.110805	0.799414
	ENSMUSG00000055116	1.35567	5.19537	2.53821	0.11112	0.800538
	ENSMUSG00000022228	-0.401281	5.58095	2.53598	0.111278	0.800538
	ENSMUSG00000026480	0.743984	7.49247	2.52848	0.111808	0.801557
	ENSMUSG00000022403	-0.491227	6.4624	2.52487	0.112064	0.801557
	ENSMUSG00000027678	0.338884	6.77061	2.52384	0.112137	0.801557
	ENSMUSG00000057572	0.312827	6.17033	2.52202	0.112267	0.801557
	ENSMUSG00000026425	0.374723	6.44311	2.5219	0.112275	0.801557
	ENSMUSG00000020737	0.397364	6.56919	2.52057	0.11237	0.801557
	ENSMUSG00000031925	-0.683007	3.71525	2.50754	0.113303	0.80182
	ENSMUSG00000027079	0.413356	5.1531	2.50628	0.113393	0.80182
	ENSMUSG00000035048	-0.352403	6.9283	2.50527	0.113466	0.80182
	ENSMUSG00000011257	-0.467627	5.34259	2.50454	0.113518	0.80182
	ENSMUSG00000024493	0.251866	7.29623	2.49538	0.114181	0.80182
	ENSMUSG00000040701	-0.4644	4.32589	2.49385	0.114292	0.80182
	ENSMUSG00000069265	0.596248	5.79755	2.49207	0.114421	0.80182
	ENSMUSG00000027009	0.618775	6.01882	2.49176	0.114444	0.80182
	ENSMUSG00000036067	0.845747	4.66234	2.48955	0.114604	0.80182
	ENSMUSG00000015568	-0.547808	12.0467	2.48873	0.114664	0.80182
	ENSMUSG00000022698	0.506034	6.05123	2.48629	0.114842	0.80182
	ENSMUSG00000026069	0.512699	4.27446	2.48559	0.114893	0.80182
	ENSMUSG00000097048	0.613737	4.14082	2.485	0.114936	0.80182
	ENSMUSG00000060678	0.439719	7.68416	2.48089	0.115237	0.80182
	ENSMUSG00000027286	-0.506097	4.45714	2.48003	0.1153	0.80182
	ENSMUSG00000030148	0.792909	7.23898	2.47915	0.115365	0.80182
	ENSMUSG00000020128	-0.464963	5.58469	2.47887	0.115385	0.80182
	ENSMUSG00000026003	-0.530385	7.63841	2.47814	0.115438	0.80182
	ENSMUSG00000029718	0.432586	7.87729	2.47601	0.115595	0.80182
	ENSMUSG00000058099	0.629629	4.86191	2.47596	0.115599	0.80182
	ENSMUSG00000042590	-0.454743	4.38802	2.47105	0.11596	0.80182
	ENSMUSG00000009687	0.485528	7.82874	2.46633	0.116309	0.80182
	ENSMUSG00000022557	0.492327	4.59316	2.46606	0.116329	0.80182
	ENSMUSG00000042121	0.323346	7.18037	2.46354	0.116516	0.80182
	ENSMUSG00000036820	0.504239	4.52384	2.46143	0.116673	0.80182
	ENSMUSG00000078713	-0.470379	6.02612	2.46049	0.116742	0.80182
	ENSMUSG00000056888	1.07577	5.26301	2.45791	0.116934	0.80182
	ENSMUSG00000022307	-0.298925	7.66558	2.45676	0.11702	0.80182
	ENSMUSG00000022453	0.425743	6.30334	2.45387	0.117235	0.80182
	ENSMUSG00000025907	-0.686291	3.70603	2.4538	0.11724	0.80182
	ENSMUSG00000068855	0.480164	6.69212	2.45271	0.117322	0.80182
	ENSMUSG00000023150	-0.631614	9.21933	2.44427	0.117955	0.80463
	ENSMUSG00000029229	0.626276	4.66292	2.44216	0.118114	0.80463
	ENSMUSG00000020520	0.440617	5.93922	2.44087	0.11821	0.80463
	ENSMUSG00000028101	0.58076	4.05254	2.4334	0.118775	0.805684
	ENSMUSG00000047368	-0.352355	7.15362	2.43193	0.118887	0.805684
	ENSMUSG00000074646	-0.72462	3.94464	2.42976	0.119051	0.805684
	ENSMUSG00000035181	0.328547	6.74509	2.42908	0.119103	0.805684
	ENSMUSG00000024335	0.303926	7.88994	2.4265	0.119299	0.805684
	ENSMUSG00000018042	0.452107	7.11546	2.42447	0.119453	0.805684
	ENSMUSG00000038122	-0.41365	6.80618	2.42387	0.119499	0.805684
	ENSMUSG00000021186	0.864138	3.65953	2.42203	0.11964	0.805684
	ENSMUSG00000079462	-0.652833	4.52436	2.41967	0.11982	0.805828
	ENSMUSG00000015133	0.291446	7.73853	2.41015	0.120551	0.808006
	ENSMUSG00000004530	0.389535	6.74937	2.40904	0.120637	0.808006
	ENSMUSG00000028269	-0.410252	7.57061	2.4059	0.120878	0.808006
	ENSMUSG00000020783	0.47423	4.59667	2.40378	0.121042	0.808006
	ENSMUSG00000029530	0.903278	3.52314	2.40318	0.121089	0.808006
	ENSMUSG00000022475	0.436563	5.74031	2.403	0.121103	0.808006
	ENSMUSG00000020143	0.64358	4.6516	2.39808	0.121484	0.809482
	ENSMUSG00000056899	-0.659021	4.75561	2.39349	0.121841	0.810259
	ENSMUSG00000022426	-0.7878	3.61041	2.39117	0.122022	0.810259
	ENSMUSG00000059866	0.360375	6.4786	2.3904	0.122083	0.810259
	ENSMUSG00000021978	-0.430219	4.98163	2.3868	0.122364	0.810259
	ENSMUSG00000040552	0.739559	6.66277	2.38632	0.122402	0.810259
	ENSMUSG00000020386	-0.416243	7.63326	2.37778	0.123072	0.81328
	ENSMUSG00000049076	0.362611	6.44886	2.37642	0.12318	0.81328
	ENSMUSG00000032311	-0.71044	7.70327	2.37297	0.123452	0.814013
	ENSMUSG00000018809	0.461045	4.47354	2.36301	0.124242	0.814936
	ENSMUSG00000030220	0.476754	6.54883	2.35881	0.124577	0.814936
	ENSMUSG00000055835	-0.510729	4.42995	2.35791	0.124649	0.814936
	ENSMUSG00000025352	0.632539	4.70211	2.3568	0.124738	0.814936
	ENSMUSG00000001943	-0.657492	5.13658	2.3552	0.124866	0.814936
	ENSMUSG00000034832	0.406799	5.37353	2.35099	0.125203	0.814936
	ENSMUSG00000085741	0.653695	3.57701	2.34213	0.125917	0.814936
	ENSMUSG00000031489	-0.913177	8.61765	2.34191	0.125935	0.814936
	ENSMUSG00000066191	0.57281	4.45532	2.34111	0.125999	0.814936
	ENSMUSG00000028184	0.58284	4.71318	2.33931	0.126145	0.814936
	ENSMUSG00000030101	0.25025	7.97615	2.33839	0.12622	0.814936
	ENSMUSG00000034042	-0.240102	7.76164	2.33793	0.126257	0.814936
	ENSMUSG00000056771	-0.523342	4.73633	2.33735	0.126304	0.814936
	ENSMUSG00000042410	0.327193	7.24847	2.33716	0.12632	0.814936
	ENSMUSG00000049439	-0.469513	5.82933	2.33613	0.126403	0.814936
	ENSMUSG00000032018	-0.634559	4.07409	2.3303	0.126877	0.814936
	ENSMUSG00000028291	0.390469	5.6833	2.32931	0.126958	0.814936
	ENSMUSG00000067288	0.420719	6.41266	2.32769	0.12709	0.814936
	ENSMUSG00000022812	-0.253122	8.56081	2.32595	0.127233	0.814936
	ENSMUSG00000034282	-0.82464	4.00424	2.32544	0.127274	0.814936
	ENSMUSG00000026632	-0.395869	5.10522	2.32464	0.12734	0.814936
	ENSMUSG00000027599	-0.276986	7.62072	2.32438	0.127361	0.814936
	ENSMUSG00000036810	-0.452961	5.44076	2.32393	0.127398	0.814936
	ENSMUSG00000032449	-0.278361	8.61844	2.32318	0.127459	0.814936
	ENSMUSG00000020812	0.731576	3.841	2.3205	0.127679	0.81531
	ENSMUSG00000059263	-0.226555	8.61951	2.30438	0.129009	0.819033
	ENSMUSG00000027189	-0.207369	9.23083	2.30402	0.12904	0.819033
	ENSMUSG00000028789	0.541329	6.30521	2.30137	0.12926	0.819033
	ENSMUSG00000028551	-0.614439	7.50537	2.30102	0.129289	0.819033
	ENSMUSG00000062175	0.609205	4.46483	2.2981	0.129532	0.819033
	ENSMUSG00000060063	0.619238	6.84929	2.29569	0.129733	0.819033
	ENSMUSG00000035356	-0.555112	7.42149	2.29508	0.129785	0.819033
	ENSMUSG00000068823	-0.537442	7.72369	2.29473	0.129814	0.819033
	ENSMUSG00000047181	0.9237	4.67131	2.29428	0.129851	0.819033
	ENSMUSG00000097462	-0.745462	6.07364	2.29392	0.129881	0.819033
	ENSMUSG00000024592	-0.453888	5.17241	2.2877	0.130403	0.819241
	ENSMUSG00000003062	0.448739	5.83741	2.28616	0.130533	0.819241
	ENSMUSG00000019966	-0.269985	8.79657	2.2784	0.131187	0.819241
	ENSMUSG00000036144	-0.378842	5.68112	2.27831	0.131195	0.819241
	ENSMUSG00000061175	0.663842	4.46765	2.27747	0.131266	0.819241
	ENSMUSG00000040253	-0.299124	8.33684	2.27704	0.131303	0.819241
	ENSMUSG00000036459	0.417568	6.36164	2.27648	0.131349	0.819241
	ENSMUSG00000029394	0.662317	3.97766	2.27211	0.131721	0.819241
	ENSMUSG00000048799	0.584067	4.06759	2.2721	0.131722	0.819241
	ENSMUSG00000005802	-0.243884	7.50855	2.27164	0.13176	0.819241
	ENSMUSG00000015143	0.481715	7.83269	2.2587	0.132866	0.819241
	ENSMUSG00000032396	-0.332078	6.30962	2.25432	0.133242	0.819241
	ENSMUSG00000090093	-0.485474	5.05983	2.25322	0.133337	0.819241
	ENSMUSG00000053158	0.551496	5.3964	2.25033	0.133586	0.819241
	ENSMUSG00000032238	-0.290576	7.70816	2.24979	0.133632	0.819241
	ENSMUSG00000050855	-0.662108	4.28818	2.24881	0.133717	0.819241
	ENSMUSG00000026279	-0.55043	4.18868	2.2476	0.133822	0.819241
	ENSMUSG00000060802	-0.307526	13.6973	2.24744	0.133836	0.819241
	ENSMUSG00000030605	0.66977	3.79379	2.2452	0.13403	0.819241
	ENSMUSG00000038178	0.349367	6.68247	2.24402	0.134132	0.819241
	ENSMUSG00000067336	-0.315559	6.25002	2.2439	0.134143	0.819241
	ENSMUSG00000028841	-0.787126	4.18417	2.24179	0.134326	0.819241
	ENSMUSG00000038365	-0.30799	6.33491	2.24124	0.134373	0.819241
	ENSMUSG00000038544	0.568621	4.50296	2.24061	0.134428	0.819241
	ENSMUSG00000028249	0.459362	5.57098	2.23998	0.134483	0.819241
	ENSMUSG00000068854	0.614584	4.17559	2.2397	0.134507	0.819241
	ENSMUSG00000040423	-0.360481	5.95995	2.23466	0.134947	0.819241
	ENSMUSG00000030203	-0.310745	6.7496	2.23436	0.134972	0.819241
	ENSMUSG00000028398	0.327244	5.99517	2.23378	0.135023	0.819241
	ENSMUSG00000049502	-0.361117	6.72864	2.23369	0.135031	0.819241
	ENSMUSG00000028886	0.247694	7.84568	2.23238	0.135146	0.819241
	ENSMUSG00000063800	-0.544665	4.434	2.23112	0.135256	0.819241
	ENSMUSG00000020362	0.438199	5.15036	2.23107	0.13526	0.819241
	ENSMUSG00000032656	0.484706	4.76078	2.22636	0.135673	0.820759
	ENSMUSG00000025199	-0.42604	5.15905	2.22355	0.13592	0.821248
	ENSMUSG00000002297	0.594768	5.06331	2.22175	0.136078	0.821248
	ENSMUSG00000027430	-0.47985	4.02662	2.21885	0.136335	0.821505
	ENSMUSG00000024672	0.941586	4.6404	2.21729	0.136473	0.821505
	ENSMUSG00000022105	-0.344954	7.7153	2.21576	0.136608	0.821505
	ENSMUSG00000027792	-0.468699	7.02291	2.2124	0.136905	0.822314
	ENSMUSG00000029725	0.464706	4.73405	2.20946	0.137166	0.822374
	ENSMUSG00000076617	0.909232	8.63881	2.20822	0.137277	0.822374
	ENSMUSG00000018377	-0.430355	5.82483	2.2068	0.137403	0.822374
	ENSMUSG00000032641	0.592826	3.94424	2.20157	0.13787	0.823061
	ENSMUSG00000061979	0.540526	3.99338	2.20032	0.137982	0.823061
	ENSMUSG00000037814	-0.68388	3.81673	2.20005	0.138006	0.823061
	ENSMUSG00000071646	0.277674	6.78943	2.19772	0.138215	0.823139
	ENSMUSG00000038622	-0.386339	5.9848	2.19459	0.138496	0.823139
	ENSMUSG00000031841	-0.443355	4.40954	2.19111	0.13881	0.823139
	ENSMUSG00000059883	0.426861	5.64996	2.19059	0.138856	0.823139
	ENSMUSG00000040263	0.309185	6.76618	2.1902	0.138892	0.823139
	ENSMUSG00000020948	0.331925	5.7514	2.18904	0.138996	0.823139
	ENSMUSG00000030272	0.398139	5.45487	2.18223	0.139612	0.82559
	ENSMUSG00000042985	-0.806921	8.79107	2.18086	0.139736	0.82559
	ENSMUSG00000031015	0.272839	7.74486	2.17777	0.140017	0.825768
	ENSMUSG00000039936	0.6616	4.3601	2.17694	0.140093	0.825768
	ENSMUSG00000052192	-0.44523	4.48329	2.17357	0.1404	0.826613
	ENSMUSG00000046516	0.576376	4.7528	2.17103	0.140632	0.82691
	ENSMUSG00000038644	0.542667	4.69065	2.16944	0.140777	0.82691
	ENSMUSG00000006360	0.535855	4.81269	2.16313	0.141357	0.828572
	ENSMUSG00000057672	0.283318	7.23599	2.16279	0.141388	0.828572
	ENSMUSG00000035021	0.346513	5.9153	2.15943	0.141698	0.828598
	ENSMUSG00000020715	0.375558	6.22332	2.15742	0.141882	0.828598
	ENSMUSG00000029469	-0.737582	4.66103	2.15659	0.141959	0.828598
	ENSMUSG00000021537	-0.292642	6.94094	2.15532	0.142077	0.828598
	ENSMUSG00000021546	-0.329123	8.22207	2.15033	0.142539	0.828598
	ENSMUSG00000069272	0.690138	5.75897	2.149	0.142663	0.828598
	ENSMUSG00000022472	0.599563	3.63236	2.14828	0.14273	0.828598
	ENSMUSG00000020638	-0.634457	4.52374	2.14787	0.142768	0.828598
	ENSMUSG00000030469	-0.524064	4.90255	2.14681	0.142867	0.828598
	ENSMUSG00000005533	0.972641	4.14059	2.14316	0.143206	0.8291
	ENSMUSG00000061615	0.91561	6.09212	2.13952	0.143547	0.8291
	ENSMUSG00000026377	-0.419415	4.48787	2.13943	0.143556	0.8291
	ENSMUSG00000022840	0.376918	9.07249	2.13625	0.143853	0.8291
	ENSMUSG00000042532	-0.777209	5.72121	2.136	0.143877	0.8291
	ENSMUSG00000027597	0.658616	5.8246	2.13294	0.144164	0.8291
	ENSMUSG00000032344	0.755729	3.59309	2.13271	0.144186	0.8291
	ENSMUSG00000024384	-0.329036	6.05106	2.12931	0.144506	0.8291
	ENSMUSG00000021981	-0.253645	7.65124	2.1268	0.144743	0.8291
	ENSMUSG00000018405	0.325493	5.80566	2.12625	0.144795	0.8291
	ENSMUSG00000018654	0.427565	5.63707	2.12088	0.145303	0.8291
	ENSMUSG00000093077	0.977818	7.15926	2.12074	0.145316	0.8291
	ENSMUSG00000033728	0.402885	4.96799	2.12038	0.14535	0.8291
	ENSMUSG00000026342	0.293606	7.04394	2.11703	0.145669	0.8291
	ENSMUSG00000053716	-0.638741	3.5982	2.11599	0.145768	0.8291
	ENSMUSG00000084817	-0.606701	4.17537	2.1124	0.14611	0.8291
	ENSMUSG00000042700	0.350966	5.4001	2.11152	0.146194	0.8291
	ENSMUSG00000046836	-0.50399	4.15245	2.10974	0.146364	0.8291
	ENSMUSG00000025894	-0.527957	4.3697	2.1094	0.146396	0.8291
	ENSMUSG00000032911	-0.85368	3.83953	2.1028	0.14703	0.8291
	ENSMUSG00000028180	-0.490736	5.15322	2.10277	0.147032	0.8291
	ENSMUSG00000041440	0.282747	6.51593	2.10198	0.147109	0.8291
	ENSMUSG00000041842	0.902691	3.76893	2.10104	0.147199	0.8291
	ENSMUSG00000046275	-0.464545	9.91489	2.09902	0.147394	0.8291
	ENSMUSG00000067370	0.544552	3.91771	2.09833	0.14746	0.8291
	ENSMUSG00000009013	0.582412	3.85744	2.09496	0.147786	0.8291
	ENSMUSG00000066113	-1.02438	4.21306	2.09368	0.147909	0.8291
	ENSMUSG00000015247	-0.310013	6.59907	2.09183	0.148088	0.8291
	ENSMUSG00000038725	-0.83209	7.76553	2.09049	0.148219	0.8291
	ENSMUSG00000016510	-0.352279	5.3491	2.08444	0.148807	0.8291
	ENSMUSG00000033576	-0.359819	9.81736	2.08385	0.148864	0.8291
	ENSMUSG00000005683	-0.495423	9.68873	2.08285	0.148962	0.8291
	ENSMUSG00000035151	-0.328973	8.53214	2.0828	0.148966	0.8291
	ENSMUSG00000027408	0.521719	5.51769	2.07952	0.149287	0.8291
	ENSMUSG00000022636	0.540173	6.07436	2.0795	0.149289	0.8291
	ENSMUSG00000049878	0.29827	6.47058	2.07886	0.149352	0.8291
	ENSMUSG00000037458	-0.572895	5.42025	2.0787	0.149368	0.8291
	ENSMUSG00000007656	-0.276025	6.96305	2.07839	0.149397	0.8291
	ENSMUSG00000095217	0.723558	5.44529	2.07661	0.149572	0.8291
	ENSMUSG00000032228	-0.290259	6.48258	2.07545	0.149686	0.8291
	ENSMUSG00000040112	-0.270191	6.66017	2.0746	0.149769	0.8291
	ENSMUSG00000038299	-0.279834	5.89721	2.07389	0.149839	0.8291
	ENSMUSG00000032898	0.537582	7.7293	2.07213	0.150012	0.829153
	ENSMUSG00000090622	0.683127	3.58037	2.06576	0.150639	0.831711
	ENSMUSG00000030055	0.392795	5.83182	2.06296	0.150917	0.832333
	ENSMUSG00000044646	-0.529705	5.69713	2.05739	0.151469	0.833915
	ENSMUSG00000037013	-0.293486	6.45261	2.05545	0.151662	0.833915
	ENSMUSG00000032425	-0.455743	4.80276	2.05407	0.1518	0.833915
	ENSMUSG00000029016	-0.557639	3.94136	2.05236	0.15197	0.833915
	ENSMUSG00000072612	0.766415	4.17216	2.04964	0.152242	0.833915
	ENSMUSG00000034936	-0.850458	5.34939	2.04762	0.152444	0.833915
	ENSMUSG00000029534	-0.396222	5.15675	2.04756	0.15245	0.833915
	ENSMUSG00000028690	-0.366859	6.78795	2.04684	0.152523	0.833915
	ENSMUSG00000020463	-0.335383	5.29488	2.04435	0.152773	0.834001
	ENSMUSG00000038718	0.680678	3.75464	2.04231	0.152977	0.834001
	ENSMUSG00000026358	1.47321	6.90655	2.03858	0.153352	0.834001
	ENSMUSG00000040596	-0.391593	5.21435	2.03684	0.153528	0.834001
	ENSMUSG00000041870	0.391208	6.56825	2.03651	0.153561	0.834001
	ENSMUSG00000000804	-0.744451	3.69069	2.03364	0.153852	0.834001
	ENSMUSG00000021831	0.407376	5.21207	2.03341	0.153875	0.834001
	ENSMUSG00000024601	-0.316353	8.58863	2.03328	0.153888	0.834001
	ENSMUSG00000028344	0.440493	4.92043	2.03147	0.154071	0.834001
	ENSMUSG00000022386	-0.415362	5.07876	2.03033	0.154187	0.834001
	ENSMUSG00000051439	0.544302	5.53577	2.02141	0.155095	0.837988
	ENSMUSG00000039262	0.495146	4.22871	2.01882	0.155359	0.837988
	ENSMUSG00000018199	-0.36338	6.50333	2.0175	0.155495	0.837988
	ENSMUSG00000027082	-0.452802	5.7328	2.0166	0.155587	0.837988
	ENSMUSG00000020642	-0.377513	7.04405	2.01413	0.155841	0.838459
	ENSMUSG00000021339	-0.320668	6.82069	2.00965	0.156302	0.839348
	ENSMUSG00000033157	-0.357387	5.27275	2.0093	0.156338	0.839348
	ENSMUSG00000042541	0.292422	8.68939	2.00474	0.156808	0.839584
	ENSMUSG00000062257	-0.723341	3.81855	2.00332	0.156955	0.839584
	ENSMUSG00000018362	0.382748	6.05619	1.99884	0.157419	0.839584
	ENSMUSG00000085517	0.621277	4.44036	1.99801	0.157506	0.839584
	ENSMUSG00000096433	-0.364999	5.58491	1.99787	0.15752	0.839584
	ENSMUSG00000079179	0.329561	5.69432	1.99763	0.157546	0.839584
	ENSMUSG00000073678	0.485717	5.23879	1.99743	0.157566	0.839584
	ENSMUSG00000037669	-0.270126	7.87537	1.99474	0.157846	0.839584
	ENSMUSG00000002307	0.403826	6.67696	1.99247	0.158083	0.839584
	ENSMUSG00000049482	0.300891	5.66793	1.98867	0.158481	0.839584
	ENSMUSG00000041375	0.352219	5.93029	1.98762	0.15859	0.839584
	ENSMUSG00000040850	-0.43471	5.77353	1.98538	0.158825	0.839584
	ENSMUSG00000044147	0.4	6.28112	1.98437	0.158931	0.839584
	ENSMUSG00000061577	0.864314	4.0273	1.98368	0.159004	0.839584
	ENSMUSG00000086584	-0.539963	4.38495	1.98075	0.159311	0.839584
	ENSMUSG00000040289	-0.662759	3.84895	1.98057	0.15933	0.839584
	ENSMUSG00000028901	0.303548	5.89819	1.98026	0.159363	0.839584
	ENSMUSG00000019188	0.26377	6.14861	1.97743	0.159661	0.839584
	ENSMUSG00000033739	0.478569	4.18098	1.97682	0.159726	0.839584
	ENSMUSG00000078139	-0.366942	5.40815	1.97667	0.159742	0.839584
	ENSMUSG00000034152	0.234345	7.55152	1.97523	0.159894	0.839584
	ENSMUSG00000027575	0.247456	7.30327	1.97252	0.16018	0.839584
	ENSMUSG00000064210	0.22021	8.35452	1.97094	0.160348	0.839584
	ENSMUSG00000004085	-0.375426	7.884	1.97077	0.160366	0.839584
	ENSMUSG00000047649	-0.537486	4.07249	1.96905	0.160549	0.839671
	ENSMUSG00000062646	-0.376178	5.75694	1.96343	0.161147	0.840302
	ENSMUSG00000020523	-0.366061	5.1878	1.96196	0.161304	0.840302
	ENSMUSG00000026575	0.648587	3.65447	1.96194	0.161306	0.840302
	ENSMUSG00000050199	0.393129	7.78392	1.96168	0.161334	0.840302
	ENSMUSG00000020780	0.536725	4.46106	1.95846	0.161679	0.841232
	ENSMUSG00000097090	0.510601	4.25998	1.95539	0.162007	0.841295
	ENSMUSG00000005198	0.384607	6.83254	1.95344	0.162216	0.841295
	ENSMUSG00000090222	-0.431234	5.52966	1.95176	0.162397	0.841295
	ENSMUSG00000029992	-0.268683	7.95055	1.95036	0.162548	0.841295
	ENSMUSG00000024566	0.313743	5.97709	1.94961	0.162629	0.841295
	ENSMUSG00000055128	-0.40681	5.31096	1.9477	0.162835	0.841295
	ENSMUSG00000020484	-0.306789	8.64705	1.94446	0.163186	0.841295
	ENSMUSG00000031865	0.270274	7.36189	1.94214	0.163436	0.841295
	ENSMUSG00000048387	-0.742013	6.37354	1.94189	0.163464	0.841295
	ENSMUSG00000020532	-0.940647	10.2751	1.93377	0.164347	0.841295
	ENSMUSG00000024360	0.293107	6.56506	1.93172	0.16457	0.841295
	ENSMUSG00000060510	-0.729479	3.86781	1.93135	0.164611	0.841295
	ENSMUSG00000039367	-0.268059	6.34131	1.92893	0.164875	0.841295
	ENSMUSG00000025373	0.239469	7.49278	1.92864	0.164907	0.841295
	ENSMUSG00000020709	0.597751	4.24845	1.92747	0.165036	0.841295
	ENSMUSG00000021508	0.833423	4.92843	1.92431	0.165383	0.841295
	ENSMUSG00000035696	-0.326094	6.19693	1.92428	0.165385	0.841295
	ENSMUSG00000032309	-0.298075	7.52785	1.92404	0.165411	0.841295
	ENSMUSG00000003929	-0.47144	5.14742	1.92367	0.165453	0.841295
	ENSMUSG00000023886	-0.534422	5.21118	1.92212	0.165623	0.841295
	ENSMUSG00000046841	0.437208	6.70029	1.92146	0.165696	0.841295
	ENSMUSG00000032407	-0.25702	7.71783	1.92067	0.165783	0.841295
	ENSMUSG00000037762	-0.703686	4.50341	1.91965	0.165896	0.841295
	ENSMUSG00000063253	-0.28473	7.13567	1.91872	0.165998	0.841295
	ENSMUSG00000001524	0.449563	5.3651	1.9169	0.166198	0.841295
	ENSMUSG00000028059	0.280598	7.44421	1.91638	0.166256	0.841295
	ENSMUSG00000027160	0.479353	5.05411	1.91509	0.166399	0.841295
	ENSMUSG00000038822	0.563744	4.05861	1.91434	0.166482	0.841295
	ENSMUSG00000019790	0.717808	3.73389	1.91404	0.166515	0.841295
	ENSMUSG00000079553	0.669502	3.5513	1.91243	0.166694	0.841359
	ENSMUSG00000005142	0.361429	8.12808	1.90904	0.16707	0.842418
	ENSMUSG00000038623	0.476483	6.12613	1.90642	0.167361	0.843045
	ENSMUSG00000037872	0.548652	4.6179	1.90191	0.167865	0.843834
	ENSMUSG00000030579	0.859119	3.75748	1.9	0.168079	0.843834
	ENSMUSG00000015488	0.299255	6.80333	1.89908	0.168182	0.843834
	ENSMUSG00000075054	-0.399202	4.67331	1.89346	0.168812	0.843834
	ENSMUSG00000069267	0.7785	6.43585	1.89341	0.168817	0.843834
	ENSMUSG00000049690	-0.653131	3.78029	1.89332	0.168827	0.843834
	ENSMUSG00000020456	-0.407911	7.11368	1.89306	0.168858	0.843834
	ENSMUSG00000023026	0.285556	7.24483	1.89296	0.168868	0.843834
	ENSMUSG00000025964	-0.418977	6.62528	1.89162	0.16902	0.843834
	ENSMUSG00000024132	-0.367605	6.43855	1.88895	0.169321	0.844504
	ENSMUSG00000027282	-0.298945	7.24179	1.88692	0.16955	0.844814
	ENSMUSG00000058587	-0.331684	6.52197	1.88454	0.169819	0.845322
	ENSMUSG00000055994	0.503603	4.077	1.87807	0.170554	0.846994
	ENSMUSG00000073096	-0.540181	4.00027	1.87512	0.170889	0.846994
	ENSMUSG00000027115	0.541579	3.9934	1.87287	0.171146	0.846994
	ENSMUSG00000072692	-0.48887	4.60652	1.87121	0.171337	0.846994
	ENSMUSG00000025902	-0.654123	3.72339	1.86945	0.171538	0.846994
	ENSMUSG00000024403	0.526556	3.99341	1.86942	0.171542	0.846994
	ENSMUSG00000034300	-0.469925	4.16536	1.86516	0.17203	0.846994
	ENSMUSG00000030116	0.507342	5.51755	1.86431	0.172129	0.846994
	ENSMUSG00000027665	-0.302468	6.92286	1.86241	0.172347	0.846994
	ENSMUSG00000021171	-0.393987	7.00047	1.86208	0.172385	0.846994
	ENSMUSG00000040687	0.360842	4.90595	1.86202	0.172391	0.846994
	ENSMUSG00000016458	-0.722846	5.18784	1.86034	0.172585	0.846994
	ENSMUSG00000007880	0.394863	5.40317	1.8574	0.172925	0.846994
	ENSMUSG00000027331	0.56641	3.90593	1.85507	0.173195	0.846994
	ENSMUSG00000047539	-0.316836	5.18877	1.85502	0.1732	0.846994
	ENSMUSG00000030188	-0.372871	4.97399	1.85372	0.173351	0.846994
	ENSMUSG00000037070	0.414741	4.48679	1.85306	0.173428	0.846994
	ENSMUSG00000063802	-0.437591	4.85746	1.85199	0.173552	0.846994
	ENSMUSG00000095990	-0.606415	3.82185	1.84994	0.17379	0.846994
	ENSMUSG00000073374	-0.44189	4.40097	1.84684	0.174151	0.846994
	ENSMUSG00000048758	-0.485805	5.40143	1.84491	0.174377	0.846994
	ENSMUSG00000026185	-0.413844	9.30489	1.84421	0.174458	0.846994
	ENSMUSG00000097350	-0.676633	3.69132	1.84413	0.174467	0.846994
	ENSMUSG00000047330	-0.786487	5.21899	1.84352	0.174539	0.846994
	ENSMUSG00000018286	0.239752	8.74834	1.84324	0.174572	0.846994
	ENSMUSG00000022952	0.597018	5.37304	1.84256	0.174651	0.846994
	ENSMUSG00000020536	0.477472	4.00871	1.84198	0.174719	0.846994
	ENSMUSG00000035764	-0.392547	6.71691	1.84091	0.174844	0.846994
	ENSMUSG00000024369	-0.385201	4.9857	1.83939	0.175022	0.847044
	ENSMUSG00000040078	-0.499979	5.66209	1.83763	0.175229	0.847232
	ENSMUSG00000026694	0.354808	5.43334	1.83083	0.176029	0.848856
	ENSMUSG00000022474	-0.391761	7.01156	1.82912	0.176232	0.848856
	ENSMUSG00000002885	0.280553	9.00472	1.82411	0.176825	0.848856
	ENSMUSG00000036636	0.239272	7.30203	1.82389	0.176851	0.848856
	ENSMUSG00000062524	0.552674	3.73022	1.81888	0.177447	0.848856
	ENSMUSG00000029625	0.331262	5.3775	1.81885	0.17745	0.848856
	ENSMUSG00000047747	0.240408	8.2644	1.81557	0.177842	0.848856
	ENSMUSG00000028102	-0.367485	5.19821	1.81272	0.178182	0.848856
	ENSMUSG00000027306	0.625471	5.26803	1.81159	0.178318	0.848856
	ENSMUSG00000066232	-0.24575	7.4544	1.81124	0.178359	0.848856
	ENSMUSG00000028649	0.265109	7.32551	1.809	0.178629	0.848856
	ENSMUSG00000022629	-0.416105	5.90795	1.80849	0.17869	0.848856
	ENSMUSG00000029994	0.31717	8.4166	1.80831	0.178711	0.848856
	ENSMUSG00000059142	-0.37021	7.50049	1.80781	0.178771	0.848856
	ENSMUSG00000032409	-0.278551	6.28325	1.80341	0.179301	0.848856
	ENSMUSG00000033032	0.33112	6.7433	1.80341	0.179301	0.848856
	ENSMUSG00000024076	0.821307	3.80199	1.80267	0.17939	0.848856
	ENSMUSG00000079293	0.6957	7.44472	1.8012	0.179568	0.848856
	ENSMUSG00000000420	-0.263215	7.19786	1.79193	0.180691	0.848856
	ENSMUSG00000053398	-0.547998	4.35672	1.79048	0.180867	0.848856
	ENSMUSG00000025722	0.509431	3.87374	1.78924	0.181019	0.848856
	ENSMUSG00000049709	0.755298	3.49299	1.78792	0.18118	0.848856
	ENSMUSG00000038545	0.749687	3.67907	1.7861	0.181402	0.848856
	ENSMUSG00000063870	0.208586	8.87716	1.78595	0.181421	0.848856
	ENSMUSG00000002107	-0.283501	8.22968	1.78431	0.181621	0.848856
	ENSMUSG00000074890	0.424324	4.65705	1.78333	0.181741	0.848856
	ENSMUSG00000004952	0.368813	6.18072	1.78174	0.181936	0.848856
	ENSMUSG00000038312	0.305682	5.93679	1.77967	0.182189	0.848856
	ENSMUSG00000022898	0.300402	6.29295	1.77851	0.182333	0.848856
	ENSMUSG00000030447	0.265026	8.80484	1.77714	0.182501	0.848856
	ENSMUSG00000032932	-0.243036	8.93349	1.77199	0.183136	0.848856
	ENSMUSG00000018474	0.492592	7.61606	1.7689	0.183519	0.848856
	ENSMUSG00000026097	-0.402882	5.33812	1.76775	0.18366	0.848856
	ENSMUSG00000031075	-0.700334	7.68814	1.7671	0.183742	0.848856
	ENSMUSG00000004069	-0.384021	5.46257	1.76292	0.184261	0.848856
	ENSMUSG00000085148	0.401825	5.06164	1.76246	0.184318	0.848856
	ENSMUSG00000059482	-0.364584	5.9355	1.76074	0.184533	0.848856
	ENSMUSG00000028676	-0.3024	6.6219	1.76041	0.184574	0.848856
	ENSMUSG00000031016	0.684951	5.20709	1.76033	0.184583	0.848856
	ENSMUSG00000028399	-0.413967	6.7007	1.76031	0.184586	0.848856
	ENSMUSG00000037366	-0.334409	6.14095	1.76031	0.184586	0.848856
	ENSMUSG00000023143	0.483008	5.44439	1.76016	0.184605	0.848856
	ENSMUSG00000028268	-0.260805	7.68932	1.75615	0.185106	0.848856
	ENSMUSG00000014932	-0.508728	5.13327	1.75482	0.185272	0.848856
	ENSMUSG00000048327	0.718021	4.37068	1.75298	0.185502	0.848856
	ENSMUSG00000035203	0.441149	5.54349	1.75262	0.185548	0.848856
	ENSMUSG00000030083	0.437546	4.43476	1.75074	0.185783	0.848856
	ENSMUSG00000028914	0.290153	5.65155	1.74803	0.186125	0.848856
	ENSMUSG00000014503	0.410818	4.9139	1.74506	0.186499	0.848856
	ENSMUSG00000006050	-0.285662	6.58728	1.7439	0.186645	0.848856
	ENSMUSG00000034088	0.241859	7.38647	1.74265	0.186803	0.848856
	ENSMUSG00000027984	-0.346814	9.16343	1.74142	0.18696	0.848856
	ENSMUSG00000042705	-0.400384	4.54379	1.73987	0.187155	0.848856
	ENSMUSG00000034154	0.239523	6.76793	1.73976	0.187169	0.848856
	ENSMUSG00000006127	-0.276398	6.70581	1.73703	0.187515	0.848856
	ENSMUSG00000042129	0.517425	6.1251	1.73682	0.187543	0.848856
	ENSMUSG00000022723	0.226301	7.77211	1.73597	0.18765	0.848856
	ENSMUSG00000036943	0.579515	5.57386	1.73504	0.187769	0.848856
	ENSMUSG00000042203	-0.481073	4.5314	1.73324	0.187998	0.848856
	ENSMUSG00000023947	0.613968	3.94745	1.73141	0.188231	0.848856
	ENSMUSG00000018707	0.20782	10.0875	1.73053	0.188343	0.848856
	ENSMUSG00000016918	-0.472903	7.27921	1.73052	0.188344	0.848856
	ENSMUSG00000034853	-1.30413	4.65965	1.73033	0.188369	0.848856
	ENSMUSG00000082179	-0.590987	9.20948	1.72823	0.188637	0.848856
	ENSMUSG00000042349	0.539578	5.08916	1.72764	0.188712	0.848856
	ENSMUSG00000085471	0.656736	3.67608	1.72413	0.189163	0.848856
	ENSMUSG00000085385	0.435344	5.03097	1.72267	0.18935	0.848856
	ENSMUSG00000026626	-0.457643	10.9862	1.71683	0.190102	0.848856
	ENSMUSG00000021418	-0.276179	5.62678	1.71602	0.190206	0.848856
	ENSMUSG00000020474	0.544894	3.94239	1.716	0.190209	0.848856
	ENSMUSG00000061816	-0.506225	6.10203	1.71537	0.190291	0.848856
	ENSMUSG00000020832	-0.440756	5.27044	1.71501	0.190337	0.848856
	ENSMUSG00000023963	0.660929	3.75749	1.71117	0.190833	0.848856
	ENSMUSG00000052681	0.306513	7.68988	1.70976	0.191016	0.848856
	ENSMUSG00000031652	0.381477	4.83508	1.7085	0.19118	0.848856
	ENSMUSG00000043496	-0.384553	5.59347	1.70805	0.191239	0.848856
	ENSMUSG00000038733	0.379989	4.73518	1.70382	0.19179	0.848856
	ENSMUSG00000090399	0.362683	5.43624	1.702	0.192026	0.848856
	ENSMUSG00000018379	-0.413927	5.76755	1.70108	0.192146	0.848856
	ENSMUSG00000027552	0.419361	4.67456	1.70044	0.19223	0.848856
	ENSMUSG00000028893	-0.353752	7.18657	1.7001	0.192274	0.848856
	ENSMUSG00000061619	0.337788	5.73186	1.6997	0.192328	0.848856
	ENSMUSG00000005610	-0.201998	9.23472	1.69937	0.192371	0.848856
	ENSMUSG00000032413	-0.295221	8.09638	1.69812	0.192534	0.848856
	ENSMUSG00000021614	0.780012	3.9306	1.69765	0.192596	0.848856
	ENSMUSG00000044934	0.378772	5.14532	1.69667	0.192724	0.848856
	ENSMUSG00000032870	0.457529	4.63761	1.69369	0.193115	0.848856
	ENSMUSG00000034707	0.196662	10.1879	1.68875	0.193765	0.848856
	ENSMUSG00000049327	-0.43123	7.26505	1.68823	0.193835	0.848856
	ENSMUSG00000020778	0.558507	4.44483	1.68778	0.193894	0.848856
	ENSMUSG00000019971	-0.400533	6.37974	1.68736	0.193949	0.848856
	ENSMUSG00000003226	0.385945	5.31253	1.68693	0.194007	0.848856
	ENSMUSG00000027346	0.277718	6.20084	1.68631	0.194088	0.848856
	ENSMUSG00000061062	-0.639821	3.73439	1.68616	0.194108	0.848856
	ENSMUSG00000016253	0.295136	5.86125	1.6858	0.194155	0.848856
	ENSMUSG00000059518	-0.547135	3.58452	1.68508	0.194251	0.848856
	ENSMUSG00000004609	0.654495	3.98816	1.68479	0.194289	0.848856
	ENSMUSG00000027428	-0.291576	7.34419	1.68087	0.194809	0.848856
	ENSMUSG00000079505	-0.555697	3.79424	1.67616	0.195435	0.848856
	ENSMUSG00000062232	-0.381819	5.73895	1.67557	0.195514	0.848856
	ENSMUSG00000071369	0.459822	4.90948	1.67386	0.195742	0.848856
	ENSMUSG00000051344	0.361824	6.93043	1.67378	0.195753	0.848856
	ENSMUSG00000032330	-0.458966	4.81147	1.67234	0.195945	0.848856
	ENSMUSG00000029661	0.433974	9.35276	1.67209	0.195978	0.848856
	ENSMUSG00000024446	0.345688	5.21859	1.67184	0.196012	0.848856
	ENSMUSG00000015937	0.257327	7.00826	1.66961	0.19631	0.848856
	ENSMUSG00000097352	0.535854	4.45977	1.66924	0.19636	0.848856
	ENSMUSG00000024078	-0.351757	5.19411	1.66709	0.196649	0.848856
	ENSMUSG00000022811	-0.274915	6.30687	1.66662	0.196712	0.848856
	ENSMUSG00000028007	-0.439204	4.74737	1.66518	0.196905	0.848856
	ENSMUSG00000030056	-0.291746	5.1839	1.66426	0.197029	0.848856
	ENSMUSG00000021368	-0.369667	5.03448	1.66196	0.197339	0.848856
	ENSMUSG00000008575	-0.459431	4.80885	1.65692	0.19802	0.848856
	ENSMUSG00000029472	0.196421	8.54014	1.65519	0.198255	0.848856
	ENSMUSG00000079470	-0.324232	5.11824	1.65517	0.198256	0.848856
	ENSMUSG00000061950	0.349296	5.89155	1.65429	0.198376	0.848856
	ENSMUSG00000020176	-0.299159	7.11278	1.65335	0.198503	0.848856
	ENSMUSG00000027447	0.273032	11.5526	1.65209	0.198675	0.848856
	ENSMUSG00000022536	-0.22358	6.84428	1.64967	0.199004	0.848856
	ENSMUSG00000080316	0.538717	5.25773	1.64964	0.199008	0.848856
	ENSMUSG00000052957	-0.558005	9.18567	1.64952	0.199024	0.848856
	ENSMUSG00000030047	0.857147	4.93761	1.64888	0.199112	0.848856
	ENSMUSG00000027130	0.324389	5.89471	1.64679	0.199396	0.848856
	ENSMUSG00000038279	-0.327619	5.83542	1.64495	0.199648	0.848856
	ENSMUSG00000021540	-0.237655	7.81383	1.64364	0.199826	0.848856
	ENSMUSG00000022807	0.367827	5.53405	1.64353	0.199842	0.848856
	ENSMUSG00000054099	-0.248466	6.42435	1.64329	0.199875	0.848856
	ENSMUSG00000020078	-0.281774	6.98697	1.64093	0.200198	0.848856
	ENSMUSG00000020346	0.279933	6.52531	1.63896	0.200468	0.848856
	ENSMUSG00000027386	0.755267	6.069	1.63891	0.200475	0.848856
	ENSMUSG00000022894	-0.541672	4.61389	1.63734	0.200691	0.848856
	ENSMUSG00000039384	-0.576621	4.62755	1.6373	0.200696	0.848856
	ENSMUSG00000078945	0.52469	5.54882	1.63535	0.200965	0.848856
	ENSMUSG00000027878	0.248719	8.54653	1.63463	0.201064	0.848856
	ENSMUSG00000062808	0.710795	4.81592	1.63299	0.20129	0.848856
	ENSMUSG00000028048	0.392039	5.23861	1.63187	0.201445	0.848856
	ENSMUSG00000028524	-0.802687	4.03155	1.63131	0.201523	0.848856
	ENSMUSG00000027555	-0.344534	7.2685	1.63054	0.201629	0.848856
	ENSMUSG00000038374	0.254449	5.63004	1.62794	0.201989	0.848856
	ENSMUSG00000027641	0.268367	6.28687	1.6273	0.202077	0.848856
	ENSMUSG00000023571	-0.340625	8.16842	1.62605	0.20225	0.848856
	ENSMUSG00000032097	-0.83473	4.0694	1.6257	0.202299	0.848856
	ENSMUSG00000040612	-0.538606	5.88765	1.62486	0.202415	0.848856
	ENSMUSG00000029152	-0.200743	8.25842	1.62455	0.202458	0.848856
	ENSMUSG00000002870	0.535667	3.97034	1.62146	0.202888	0.848856
	ENSMUSG00000001240	0.414332	6.47306	1.61947	0.203166	0.848856
	ENSMUSG00000092215	-0.611223	5.06569	1.61579	0.20368	0.848856
	ENSMUSG00000067274	0.259876	12.1215	1.61482	0.203816	0.848856
	ENSMUSG00000031787	0.367346	5.48062	1.61316	0.204048	0.848856
	ENSMUSG00000060152	-0.365953	4.72167	1.61314	0.204051	0.848856
	ENSMUSG00000018923	0.308324	5.77212	1.61298	0.204073	0.848856
	ENSMUSG00000027737	0.95795	4.33835	1.61155	0.204273	0.848856
	ENSMUSG00000003778	0.253111	6.28253	1.60932	0.204588	0.848856
	ENSMUSG00000026116	0.700382	4.26804	1.60503	0.205192	0.848856
	ENSMUSG00000026150	-0.208401	8.42102	1.60414	0.205318	0.848856
	ENSMUSG00000027820	-0.372661	6.17059	1.6039	0.205352	0.848856
	ENSMUSG00000033149	-0.553301	5.14356	1.60205	0.205613	0.848856
	ENSMUSG00000094114	0.428867	4.75261	1.60165	0.205669	0.848856
	ENSMUSG00000022324	-0.400069	5.42625	1.60137	0.20571	0.848856
	ENSMUSG00000020072	0.797308	4.59931	1.60106	0.205753	0.848856
	ENSMUSG00000022816	0.487918	5.22185	1.59969	0.205947	0.848856
	ENSMUSG00000089417	0.368321	9.15427	1.59912	0.206028	0.848856
	ENSMUSG00000030830	0.561769	4.44369	1.59798	0.20619	0.848856
	ENSMUSG00000030737	0.318224	8.30087	1.59759	0.206245	0.848856
	ENSMUSG00000031954	0.414973	4.71373	1.59739	0.206273	0.848856
	ENSMUSG00000027620	-0.266534	8.93737	1.59733	0.206282	0.848856
	ENSMUSG00000029319	-0.326899	5.38556	1.59716	0.206306	0.848856
	ENSMUSG00000038608	0.276574	7.92761	1.59647	0.206405	0.848856
	ENSMUSG00000011427	0.292672	6.35022	1.59278	0.20693	0.848856
	ENSMUSG00000046186	0.637131	4.98772	1.59197	0.207045	0.848856
	ENSMUSG00000033186	-0.321738	5.52792	1.5914	0.207127	0.848856
	ENSMUSG00000021738	-0.410725	4.37751	1.59031	0.207282	0.848856
	ENSMUSG00000041241	-0.396046	4.91367	1.58996	0.207332	0.848856
	ENSMUSG00000021094	-0.43061	6.95303	1.58925	0.207433	0.848856
	ENSMUSG00000028152	-0.507529	4.88368	1.58878	0.2075	0.848856
	ENSMUSG00000011256	0.430387	6.77331	1.5865	0.207827	0.848856
	ENSMUSG00000021708	-0.35951	6.75594	1.58636	0.207847	0.848856
	ENSMUSG00000036086	0.558218	3.93408	1.58595	0.207906	0.848856
	ENSMUSG00000022364	-0.38378	5.42684	1.58494	0.208051	0.848856
	ENSMUSG00000016128	-0.334882	5.72997	1.58481	0.208069	0.848856
	ENSMUSG00000086825	0.584454	5.34378	1.58352	0.208254	0.848856
	ENSMUSG00000021411	-0.385556	7.58612	1.58212	0.208456	0.848856
	ENSMUSG00000056602	-0.428548	8.52891	1.57929	0.208864	0.848856
	ENSMUSG00000020993	-0.275051	7.31901	1.57804	0.209043	0.848856
	ENSMUSG00000038212	-0.392279	4.66907	1.57794	0.209058	0.848856
	ENSMUSG00000030551	-0.921634	4.78933	1.57709	0.209181	0.848856
	ENSMUSG00000067786	-0.827381	5.53231	1.57598	0.20934	0.848856
	ENSMUSG00000020185	0.594987	4.08763	1.57499	0.209484	0.848856
	ENSMUSG00000027263	0.32716	5.4344	1.57309	0.209759	0.848856
	ENSMUSG00000006517	-0.585529	5.64272	1.57281	0.209799	0.848856
	ENSMUSG00000027303	0.238957	6.66354	1.57114	0.210042	0.848856
	ENSMUSG00000025154	0.519478	6.11394	1.56699	0.210644	0.848856
	ENSMUSG00000035133	-0.304552	6.41228	1.56653	0.210711	0.848856
	ENSMUSG00000016024	0.518285	9.69204	1.56649	0.210718	0.848856
	ENSMUSG00000021716	0.312815	5.12283	1.56436	0.211028	0.848856
	ENSMUSG00000026509	-0.255631	9.45774	1.56317	0.211202	0.848856
	ENSMUSG00000028015	-0.319933	5.99139	1.56032	0.211619	0.848856
	ENSMUSG00000033379	0.264141	8.36058	1.55952	0.211736	0.848856
	ENSMUSG00000044982	0.595221	3.68874	1.5556	0.212311	0.848856
	ENSMUSG00000021712	-0.253381	7.12617	1.55111	0.212971	0.848856
	ENSMUSG00000001999	0.384405	6.75481	1.55084	0.213011	0.848856
	ENSMUSG00000053684	-0.362016	5.07817	1.54749	0.213507	0.848856
	ENSMUSG00000021824	-0.264072	6.81918	1.54615	0.213704	0.848856
	ENSMUSG00000026639	0.547265	3.97482	1.54579	0.213758	0.848856
	ENSMUSG00000072915	0.503391	3.94062	1.54552	0.213798	0.848856
	ENSMUSG00000072620	0.585665	5.55548	1.54529	0.213832	0.848856
	ENSMUSG00000037339	0.300794	5.23859	1.54476	0.213911	0.848856
	ENSMUSG00000063838	0.423282	5.54309	1.53993	0.214628	0.848856
	ENSMUSG00000027858	-0.953441	4.77574	1.53956	0.214683	0.848856
	ENSMUSG00000017631	0.386466	6.35561	1.53942	0.214704	0.848856
	ENSMUSG00000026196	0.570408	3.77667	1.53765	0.214968	0.848856
	ENSMUSG00000024563	-0.197667	7.3117	1.53691	0.215079	0.848856
	ENSMUSG00000053819	-0.220202	8.90583	1.53664	0.215118	0.848856
	ENSMUSG00000021286	-0.387428	4.81405	1.53558	0.215277	0.848856
	ENSMUSG00000060509	0.460525	4.41221	1.53481	0.215393	0.848856
	ENSMUSG00000040356	0.244192	7.30244	1.53368	0.21556	0.848856
	ENSMUSG00000053040	0.711359	6.28207	1.53338	0.215606	0.848856
	ENSMUSG00000018554	-0.693452	4.26034	1.53246	0.215743	0.848856
	ENSMUSG00000024570	0.246271	6.66421	1.53205	0.215804	0.848856
	ENSMUSG00000061991	0.608417	6.65169	1.53008	0.216101	0.848856
	ENSMUSG00000028467	0.442346	4.10665	1.5267	0.216609	0.848856
	ENSMUSG00000020171	0.202794	6.73856	1.52499	0.216866	0.848856
	ENSMUSG00000058392	0.373819	4.30552	1.52356	0.217081	0.848856
	ENSMUSG00000083832	-0.276714	6.41829	1.52314	0.217145	0.848856
	ENSMUSG00000014956	-0.332096	7.0928	1.51712	0.218056	0.848856
	ENSMUSG00000040044	-0.214977	7.07233	1.51629	0.218181	0.848856
	ENSMUSG00000061286	0.290616	6.10478	1.51523	0.218342	0.848856
	ENSMUSG00000041915	0.38204	4.83428	1.51459	0.21844	0.848856
	ENSMUSG00000031627	0.551185	3.96754	1.51373	0.218571	0.848856
	ENSMUSG00000066568	-0.248102	6.05158	1.51369	0.218576	0.848856
	ENSMUSG00000045896	-0.337569	5.08055	1.51368	0.218579	0.848856
	ENSMUSG00000030279	0.30862	5.99982	1.50996	0.219145	0.848856
	ENSMUSG00000027635	-0.327125	5.16073	1.50983	0.219165	0.848856
	ENSMUSG00000018427	0.292515	6.48597	1.50787	0.219464	0.848856
	ENSMUSG00000030330	0.266399	6.71792	1.50421	0.220025	0.848856
	ENSMUSG00000031696	-0.22641	8.58412	1.50418	0.220029	0.848856
	ENSMUSG00000090841	0.322087	9.50195	1.50166	0.220416	0.848856
	ENSMUSG00000062960	-0.371406	6.87027	1.50016	0.220647	0.848856
	ENSMUSG00000049313	-0.489982	5.19853	1.49947	0.220752	0.848856
	ENSMUSG00000048960	-0.302922	8.77523	1.49941	0.220763	0.848856
	ENSMUSG00000050017	0.496697	4.43866	1.49933	0.220774	0.848856
	ENSMUSG00000097397	-0.553039	3.67895	1.49756	0.221047	0.848856
	ENSMUSG00000024608	0.456949	4.02866	1.49621	0.221256	0.848856
	ENSMUSG00000033880	-0.299095	6.71104	1.49577	0.221323	0.848856
	ENSMUSG00000069515	0.640008	8.68055	1.49481	0.221472	0.848856
	ENSMUSG00000005370	0.38986	4.35867	1.49366	0.22165	0.848856
	ENSMUSG00000029156	-0.328469	4.90587	1.49236	0.221851	0.848856
	ENSMUSG00000023307	-0.263878	8.89714	1.49097	0.222066	0.848856
	ENSMUSG00000042644	0.455152	7.21189	1.49007	0.222206	0.848856
	ENSMUSG00000024983	-0.33249	4.91822	1.48908	0.22236	0.848856
	ENSMUSG00000032114	0.524085	5.72261	1.48836	0.222471	0.848856
	ENSMUSG00000007836	0.224037	6.75984	1.48772	0.22257	0.848856
	ENSMUSG00000036992	-0.476867	4.15522	1.48739	0.222621	0.848856
	ENSMUSG00000069516	0.636235	12.4123	1.48644	0.22277	0.848856
	ENSMUSG00000031657	-0.344319	4.78869	1.48592	0.222851	0.848856
	ENSMUSG00000037166	-1.04313	3.99623	1.48515	0.22297	0.848856
	ENSMUSG00000032231	0.396946	5.74507	1.48463	0.223052	0.848856
	ENSMUSG00000038369	0.302896	5.82832	1.48354	0.223222	0.848856
	ENSMUSG00000034101	0.254747	6.87599	1.48348	0.223231	0.848856
	ENSMUSG00000066148	0.453958	3.93747	1.48241	0.223397	0.848856
	ENSMUSG00000075297	0.424284	4.39352	1.48228	0.223418	0.848856
	ENSMUSG00000058690	-0.423165	5.15669	1.48222	0.223427	0.848856
	ENSMUSG00000029802	0.492573	4.54752	1.4821	0.223447	0.848856
	ENSMUSG00000031021	-0.315787	5.93925	1.48209	0.223449	0.848856
	ENSMUSG00000029178	-0.437993	4.73418	1.47989	0.223792	0.848856
	ENSMUSG00000034424	-0.292792	6.55331	1.47898	0.223935	0.848856
	ENSMUSG00000032875	0.466848	6.13008	1.4789	0.223947	0.848856
	ENSMUSG00000024604	0.254464	6.38541	1.47774	0.224128	0.848856
	ENSMUSG00000026404	-0.36979	4.43498	1.47607	0.22439	0.848856
	ENSMUSG00000031790	-0.489601	5.01811	1.4745	0.224637	0.848856
	ENSMUSG00000022967	0.321352	5.34149	1.47435	0.22466	0.848856
	ENSMUSG00000035842	-0.468458	3.71415	1.47176	0.225068	0.848856
	ENSMUSG00000019718	-0.383326	6.16855	1.46917	0.225476	0.848856
	ENSMUSG00000022788	0.519111	4.22487	1.46859	0.225569	0.848856
	ENSMUSG00000028763	0.29508	10.912	1.46659	0.225885	0.848856
	ENSMUSG00000020017	0.497167	8.30601	1.46417	0.226267	0.848856
	ENSMUSG00000023973	-0.303938	5.32487	1.46192	0.226625	0.848856
	ENSMUSG00000038188	0.384733	4.37238	1.46134	0.226718	0.848856
	ENSMUSG00000037876	0.30949	8.54963	1.4598	0.226962	0.848856
	ENSMUSG00000052539	-0.324884	5.31219	1.45676	0.227447	0.848856
	ENSMUSG00000019054	-0.403729	4.67322	1.45617	0.227541	0.848856
	ENSMUSG00000055737	0.440295	5.64395	1.45587	0.227588	0.848856
	ENSMUSG00000042249	0.330867	6.16483	1.454	0.227887	0.848856
	ENSMUSG00000032418	-0.710112	10.5786	1.45399	0.227888	0.848856
	ENSMUSG00000022217	0.601388	3.73461	1.45352	0.227964	0.848856
	ENSMUSG00000028811	0.224149	7.15608	1.4529	0.228064	0.848856
	ENSMUSG00000026834	-0.471849	5.68797	1.45054	0.228442	0.848856
	ENSMUSG00000035279	0.492573	5.02171	1.4496	0.228592	0.848856
	ENSMUSG00000048218	-0.490501	5.28004	1.44897	0.228693	0.848856
	ENSMUSG00000036879	-0.360594	5.22244	1.44751	0.228928	0.848856
	ENSMUSG00000015653	-0.883357	3.77848	1.44709	0.228996	0.848856
	ENSMUSG00000041945	-0.47239	4.12229	1.44425	0.229453	0.848856
	ENSMUSG00000028700	-0.255845	6.07346	1.44354	0.229568	0.848856
	ENSMUSG00000071644	0.206507	7.61886	1.44187	0.229837	0.848856
	ENSMUSG00000037601	0.329495	5.87116	1.43928	0.230256	0.848856
	ENSMUSG00000041134	-0.481016	5.2614	1.43889	0.23032	0.848856
	ENSMUSG00000045973	-0.254111	8.68851	1.43817	0.230436	0.848856
	ENSMUSG00000020376	0.247306	6.74471	1.43759	0.23053	0.848856
	ENSMUSG00000021669	-0.474943	4.31478	1.43752	0.230541	0.848856
	ENSMUSG00000018548	-0.356589	5.77021	1.43534	0.230895	0.848856
	ENSMUSG00000011877	0.388896	4.89718	1.43483	0.230978	0.848856
	ENSMUSG00000040025	-0.262655	6.23765	1.43286	0.231298	0.848856
	ENSMUSG00000064302	0.229316	6.69838	1.43256	0.231347	0.848856
	ENSMUSG00000038126	0.388472	5.07893	1.43099	0.231604	0.848856
	ENSMUSG00000026393	-0.247363	7.98254	1.4301	0.231748	0.848856
	ENSMUSG00000089942	0.576402	4.62951	1.42988	0.231784	0.848856
	ENSMUSG00000029366	0.350962	5.21344	1.4293	0.231879	0.848856
	ENSMUSG00000011158	0.312682	5.71227	1.42845	0.232018	0.848856
	ENSMUSG00000066278	0.42838	4.26446	1.42815	0.232067	0.848856
	ENSMUSG00000021748	-0.545426	7.89802	1.42698	0.232258	0.848856
	ENSMUSG00000020079	-0.389279	5.35118	1.42357	0.232816	0.848856
	ENSMUSG00000028991	-0.266602	6.61863	1.42337	0.232849	0.848856
	ENSMUSG00000027490	0.361713	5.49916	1.42337	0.23285	0.848856
	ENSMUSG00000071072	-0.218957	8.1864	1.42295	0.232918	0.848856
	ENSMUSG00000023938	-0.464964	3.86516	1.42145	0.233165	0.848856
	ENSMUSG00000026621	0.480945	8.33854	1.41968	0.233457	0.848856
	ENSMUSG00000039361	-0.431603	6.95627	1.41946	0.233493	0.848856
	ENSMUSG00000097258	0.487639	4.34048	1.41871	0.233615	0.848856
	ENSMUSG00000028419	-0.334993	6.52945	1.41844	0.23366	0.848856
	ENSMUSG00000068747	-0.305939	7.54497	1.41828	0.233686	0.848856
	ENSMUSG00000069300	0.65843	5.20775	1.41813	0.233712	0.848856
	ENSMUSG00000044783	0.221273	7.58804	1.41655	0.233972	0.848856
	ENSMUSG00000078622	-0.399297	4.67852	1.41604	0.234056	0.848856
	ENSMUSG00000024610	0.398496	10.4102	1.41519	0.234197	0.848856
	ENSMUSG00000022425	-0.383007	7.81733	1.41292	0.234572	0.848856
	ENSMUSG00000036875	0.476781	5.59018	1.41044	0.234983	0.848856
	ENSMUSG00000028453	0.233406	6.50735	1.40852	0.235303	0.848856
	ENSMUSG00000052837	-0.736615	6.47487	1.40702	0.235551	0.848856
	ENSMUSG00000097275	-0.533166	4.23328	1.40586	0.235744	0.848856
	ENSMUSG00000015889	0.264379	6.79935	1.40533	0.235833	0.848856
	ENSMUSG00000041815	-0.319242	5.37969	1.40322	0.236185	0.848856
	ENSMUSG00000021423	0.554605	5.09589	1.40262	0.236285	0.848856
	ENSMUSG00000024002	0.316488	5.84778	1.40198	0.236393	0.848856
	ENSMUSG00000055991	-0.304741	5.35	1.40104	0.236549	0.848856
	ENSMUSG00000031980	-0.571801	7.16773	1.3998	0.236757	0.848856
	ENSMUSG00000068134	-0.269934	5.6483	1.39841	0.236991	0.848856
	ENSMUSG00000034413	0.289161	6.27265	1.39766	0.237115	0.848856
	ENSMUSG00000038774	-0.261298	6.3049	1.39742	0.237157	0.848856
	ENSMUSG00000028669	0.488617	4.12494	1.39559	0.237464	0.848856
	ENSMUSG00000045917	0.410803	5.29553	1.39525	0.237521	0.848856
	ENSMUSG00000083844	0.30406	5.28109	1.39476	0.237603	0.848856
	ENSMUSG00000013089	0.253761	6.43961	1.3944	0.237664	0.848856
	ENSMUSG00000058258	-0.500713	3.86429	1.39427	0.237685	0.848856
	ENSMUSG00000032349	-0.24713	8.14004	1.3938	0.237764	0.848856
	ENSMUSG00000026577	-0.254715	5.98012	1.39266	0.237957	0.848856
	ENSMUSG00000020577	-0.338997	7.069	1.3909	0.238254	0.848856
	ENSMUSG00000026309	0.274245	6.17678	1.39054	0.238314	0.848856
	ENSMUSG00000021222	0.318542	5.91649	1.39052	0.238317	0.848856
	ENSMUSG00000030589	0.406442	5.11973	1.39033	0.23835	0.848856
	ENSMUSG00000050567	0.460049	4.21253	1.38929	0.238524	0.848856
	ENSMUSG00000021213	-0.351017	6.28512	1.38814	0.23872	0.848856
	ENSMUSG00000064246	0.635157	4.66032	1.38793	0.238756	0.848856
	ENSMUSG00000038587	-0.427551	5.63909	1.38789	0.238761	0.848856
	ENSMUSG00000037847	0.399013	4.48207	1.38532	0.239197	0.848856
	ENSMUSG00000042992	-0.257411	5.62537	1.38446	0.239343	0.848856
	ENSMUSG00000041992	-0.353292	6.1061	1.38403	0.239417	0.848856
	ENSMUSG00000026395	0.487046	7.48253	1.38218	0.23973	0.848856
	ENSMUSG00000023348	-0.364915	5.08326	1.38174	0.239805	0.848856
	ENSMUSG00000002147	0.221274	7.04537	1.38144	0.239856	0.848856
	ENSMUSG00000094320	-0.523853	3.91495	1.37977	0.24014	0.848856
	ENSMUSG00000030653	0.278293	8.38062	1.37955	0.240178	0.848856
	ENSMUSG00000025980	-0.363301	6.22549	1.37806	0.240432	0.848856
	ENSMUSG00000046410	0.564138	4.21263	1.37715	0.240588	0.848856
	ENSMUSG00000028369	0.460753	9.41234	1.37695	0.240621	0.848856
	ENSMUSG00000033781	-0.320535	6.23227	1.37632	0.240729	0.848856
	ENSMUSG00000030335	-0.49235	4.84892	1.37589	0.240802	0.848856
	ENSMUSG00000047554	-0.2297	6.48578	1.37563	0.240846	0.848856
	ENSMUSG00000060586	0.44832	10.9932	1.37335	0.241237	0.848856
	ENSMUSG00000020100	0.260621	6.71439	1.37335	0.241238	0.848856
	ENSMUSG00000006958	-0.48073	4.25258	1.37289	0.241316	0.848856
	ENSMUSG00000071984	-0.457635	7.07862	1.37091	0.241655	0.848856
	ENSMUSG00000019960	-0.323927	7.69759	1.37052	0.241722	0.848856
	ENSMUSG00000095325	0.306417	5.48884	1.37034	0.241753	0.848856
	ENSMUSG00000019433	0.270055	6.28599	1.36912	0.241964	0.848856
	ENSMUSG00000021763	-0.558039	5.41633	1.36635	0.242441	0.848856
	ENSMUSG00000041057	0.281821	5.3328	1.36623	0.242461	0.848856
	ENSMUSG00000037643	-0.235645	5.82217	1.36581	0.242532	0.848856
	ENSMUSG00000049307	0.656856	4.12096	1.36574	0.242546	0.848856
	ENSMUSG00000041362	0.477121	5.55424	1.36498	0.242676	0.848856
	ENSMUSG00000038467	0.221032	8.1579	1.36209	0.243176	0.848856
	ENSMUSG00000030341	-0.250564	7.08836	1.36186	0.243215	0.848856
	ENSMUSG00000023980	0.310732	5.23306	1.36116	0.243336	0.848856
	ENSMUSG00000030386	0.386251	4.92975	1.36052	0.243447	0.848856
	ENSMUSG00000022205	-0.302612	8.93167	1.35628	0.244184	0.848856
	ENSMUSG00000013593	-0.273394	9.7169	1.35451	0.244491	0.848856
	ENSMUSG00000027646	0.452953	5.77814	1.35426	0.244535	0.848856
	ENSMUSG00000019975	-0.503227	3.82047	1.35407	0.244568	0.848856
	ENSMUSG00000021725	0.435401	5.41579	1.35354	0.24466	0.848856
	ENSMUSG00000027287	-0.261497	7.24578	1.35279	0.244791	0.848856
	ENSMUSG00000044092	0.470144	3.99199	1.35276	0.244797	0.848856
	ENSMUSG00000040945	0.286101	5.7477	1.35245	0.244851	0.848856
	ENSMUSG00000086003	-0.460064	4.57414	1.35074	0.245148	0.848856
	ENSMUSG00000009079	0.523334	3.64953	1.34679	0.24584	0.848856
	ENSMUSG00000055980	-0.404764	5.2444	1.34614	0.245955	0.848856
	ENSMUSG00000051236	-0.482715	4.45958	1.34553	0.24606	0.848856
	ENSMUSG00000058761	0.244407	5.96331	1.34506	0.246143	0.848856
	ENSMUSG00000019872	-0.247259	9.04564	1.34354	0.246411	0.848856
	ENSMUSG00000050931	-0.544657	4.14118	1.34039	0.246966	0.848856
	ENSMUSG00000054690	-0.384145	5.3223	1.3401	0.247017	0.848856
	ENSMUSG00000033845	-0.320064	6.47439	1.33967	0.247093	0.848856
	ENSMUSG00000032372	0.69652	5.9322	1.33961	0.247102	0.848856
	ENSMUSG00000035305	-0.612182	4.97138	1.33959	0.247106	0.848856
	ENSMUSG00000008976	-0.256717	6.73411	1.33948	0.247126	0.848856
	ENSMUSG00000022234	0.169767	8.46043	1.33797	0.247392	0.848856
	ENSMUSG00000032698	0.4007	5.39671	1.33696	0.247571	0.848856
	ENSMUSG00000068923	-0.40129	4.90798	1.33661	0.247633	0.848856
	ENSMUSG00000022337	-0.313567	8.27535	1.33606	0.24773	0.848856
	ENSMUSG00000037697	0.443341	4.61944	1.33239	0.248381	0.848856
	ENSMUSG00000026999	-0.362882	4.52519	1.33166	0.248511	0.848856
	ENSMUSG00000029417	-0.46601	6.21403	1.33162	0.248516	0.848856
	ENSMUSG00000028412	0.450805	3.92056	1.33112	0.248607	0.848856
	ENSMUSG00000018796	-0.428621	11.5111	1.33105	0.248619	0.848856
	ENSMUSG00000020181	-0.279028	7.53092	1.33022	0.248766	0.848856
	ENSMUSG00000053841	-0.170581	8.00921	1.33004	0.248798	0.848856
	ENSMUSG00000020745	-0.167763	9.2519	1.32978	0.248845	0.848856
	ENSMUSG00000015002	-0.198922	8.19918	1.32966	0.248865	0.848856
	ENSMUSG00000026479	0.78632	5.1295	1.32941	0.248911	0.848856
	ENSMUSG00000072568	0.604774	4.81879	1.32779	0.249199	0.848856
	ENSMUSG00000036594	0.440966	11.7472	1.32701	0.249338	0.848856
	ENSMUSG00000005505	0.532828	3.7406	1.32358	0.249951	0.848856
	ENSMUSG00000058388	0.473184	4.53474	1.32266	0.250116	0.848856
	ENSMUSG00000090150	-0.283433	8.17234	1.32253	0.250139	0.848856
	ENSMUSG00000030347	-0.460943	4.00696	1.32225	0.250189	0.848856
	ENSMUSG00000027797	0.457125	6.01976	1.32222	0.250194	0.848856
	ENSMUSG00000053687	0.82052	4.21854	1.32183	0.250263	0.848856
	ENSMUSG00000020108	-0.631638	5.32875	1.32117	0.250382	0.848856
	ENSMUSG00000003721	-0.25017	6.7814	1.3193	0.250718	0.848856
	ENSMUSG00000000957	0.575719	8.15835	1.31805	0.250942	0.848856
	ENSMUSG00000019461	0.279267	5.64527	1.31804	0.250945	0.848856
	ENSMUSG00000040374	-0.268424	5.87551	1.31802	0.250948	0.848856
	ENSMUSG00000042694	0.332478	4.64568	1.3174	0.251059	0.848856
	ENSMUSG00000047379	-0.247854	6.48776	1.31698	0.251136	0.848856
	ENSMUSG00000027165	-0.254646	6.84688	1.31354	0.251755	0.848856
	ENSMUSG00000029480	0.447915	3.80105	1.31346	0.251768	0.848856
	ENSMUSG00000042650	-0.41347	4.45409	1.31263	0.251919	0.848856
	ENSMUSG00000056144	-0.356244	5.8085	1.31231	0.251976	0.848856
	ENSMUSG00000028060	0.245973	5.96996	1.31124	0.25217	0.848856
	ENSMUSG00000025153	-0.987072	5.88353	1.31124	0.25217	0.848856
	ENSMUSG00000027394	0.246406	6.01578	1.311	0.252215	0.848856
	ENSMUSG00000049241	-0.389722	7.66162	1.30807	0.252745	0.848856
	ENSMUSG00000022546	-0.400644	6.18599	1.30764	0.252822	0.848856
	ENSMUSG00000043740	0.687508	3.73283	1.30762	0.252825	0.848856
	ENSMUSG00000041390	0.291884	7.91027	1.30741	0.252865	0.848856
	ENSMUSG00000025077	0.308078	5.49617	1.30732	0.25288	0.848856
	ENSMUSG00000020923	0.19321	8.29216	1.30653	0.253023	0.848856
	ENSMUSG00000074088	0.235539	5.88698	1.30568	0.253178	0.848856
	ENSMUSG00000057230	-0.264465	5.92753	1.30514	0.253277	0.848856
	ENSMUSG00000029575	-0.338979	5.98717	1.30382	0.253517	0.848856
	ENSMUSG00000020593	-0.477969	9.70708	1.30352	0.253572	0.848856
	ENSMUSG00000028760	0.270824	5.70143	1.30318	0.253632	0.848856
	ENSMUSG00000059939	0.293744	6.02686	1.30266	0.253727	0.848856
	ENSMUSG00000021420	-0.409027	5.14165	1.30119	0.253997	0.848856
	ENSMUSG00000041219	0.468354	5.45827	1.30072	0.254081	0.848856
	ENSMUSG00000090641	-0.403413	4.52985	1.29953	0.254299	0.848856
	ENSMUSG00000040274	0.47664	4.72975	1.29832	0.254521	0.848856
	ENSMUSG00000020917	-0.744962	9.69685	1.2977	0.254633	0.848856
	ENSMUSG00000042709	-0.430357	4.74381	1.29727	0.254713	0.848856
	ENSMUSG00000058093	-0.420274	4.27121	1.29511	0.255108	0.848856
	ENSMUSG00000030545	-0.363129	6.60358	1.2943	0.255256	0.848856
	ENSMUSG00000023885	0.746513	5.1728	1.29312	0.255473	0.848856
	ENSMUSG00000024426	-0.368294	4.22829	1.29178	0.25572	0.848856
	ENSMUSG00000032423	-0.370551	5.40095	1.29076	0.255908	0.848856
	ENSMUSG00000020914	0.724225	4.67411	1.28881	0.256268	0.848856
	ENSMUSG00000031948	-0.200156	6.97194	1.28738	0.256531	0.848856
	ENSMUSG00000097660	0.453207	4.36964	1.287	0.256602	0.848856
	ENSMUSG00000048076	-0.269352	7.83892	1.28691	0.256619	0.848856
	ENSMUSG00000069833	-0.415418	9.0079	1.28524	0.256926	0.848856
	ENSMUSG00000031503	0.390627	12.1885	1.28435	0.257092	0.848856
	ENSMUSG00000026014	0.406459	4.30947	1.28428	0.257105	0.848856
	ENSMUSG00000024359	-0.292544	9.48563	1.28361	0.257229	0.848856
	ENSMUSG00000021285	0.315573	4.95054	1.28309	0.257325	0.848856
	ENSMUSG00000045409	0.394817	4.4552	1.28281	0.257377	0.848856
	ENSMUSG00000032850	-0.598113	3.53227	1.28269	0.2574	0.848856
	ENSMUSG00000029478	-0.339404	5.36975	1.28185	0.257556	0.848856
	ENSMUSG00000054277	0.22008	6.33516	1.28053	0.257801	0.848856
	ENSMUSG00000037110	-0.368749	6.99386	1.28042	0.25782	0.848856
	ENSMUSG00000074867	-0.37734	4.52619	1.27952	0.257988	0.848856
	ENSMUSG00000037325	-0.356279	4.80218	1.27881	0.25812	0.848856
	ENSMUSG00000038668	0.449552	6.15437	1.27866	0.258149	0.848856
	ENSMUSG00000048376	0.461064	5.59111	1.27745	0.258374	0.848856
	ENSMUSG00000097640	0.487621	4.09349	1.27727	0.258407	0.848856
	ENSMUSG00000048106	0.397786	4.62631	1.27711	0.258437	0.848856
	ENSMUSG00000038213	-0.263836	6.10216	1.2766	0.258533	0.848856
	ENSMUSG00000067722	-0.259296	6.2996	1.27491	0.258848	0.848856
	ENSMUSG00000027002	0.239965	5.86018	1.27437	0.258949	0.848856
	ENSMUSG00000035258	-0.48655	7.41103	1.27353	0.259105	0.848856
	ENSMUSG00000051504	0.329045	5.06639	1.27307	0.259192	0.848856
	ENSMUSG00000026103	-0.285676	8.26191	1.27275	0.259252	0.848856
	ENSMUSG00000034274	0.295314	5.35094	1.27163	0.259461	0.848856
	ENSMUSG00000027654	0.764667	4.19711	1.27071	0.259633	0.848856
	ENSMUSG00000037224	0.39732	5.42576	1.26963	0.259836	0.848856
	ENSMUSG00000019873	-0.185866	9.53582	1.26961	0.259839	0.848856
	ENSMUSG00000021666	0.455981	3.76984	1.26931	0.259896	0.848856
	ENSMUSG00000030733	-0.404219	4.48327	1.26928	0.259901	0.848856
	ENSMUSG00000024576	-0.171981	10.7371	1.26625	0.260472	0.848856
	ENSMUSG00000024726	0.343219	5.36575	1.26589	0.26054	0.848856
	ENSMUSG00000027423	0.373785	5.24165	1.26558	0.260598	0.848856
	ENSMUSG00000059288	-0.342754	4.57172	1.26157	0.261354	0.848856
	ENSMUSG00000019471	0.311931	6.30237	1.26087	0.261486	0.848856
	ENSMUSG00000097177	-0.551225	3.81667	1.2604	0.261575	0.848856
	ENSMUSG00000024248	-0.29501	5.93834	1.25905	0.26183	0.848856
	ENSMUSG00000024219	-0.237836	7.18066	1.25819	0.261994	0.848856
	ENSMUSG00000017286	-0.199722	6.51072	1.25816	0.262	0.848856
	ENSMUSG00000027961	-0.481801	6.64422	1.25793	0.262043	0.848856
	ENSMUSG00000029518	0.285332	6.31215	1.25735	0.262154	0.848856
	ENSMUSG00000006369	-0.606921	4.76109	1.25725	0.262171	0.848856
	ENSMUSG00000025911	-0.573384	5.43666	1.25706	0.262208	0.848856
	ENSMUSG00000028096	-0.391318	4.01998	1.25589	0.26243	0.848856
	ENSMUSG00000024247	0.471096	3.93964	1.25573	0.262461	0.848856
	ENSMUSG00000007891	0.41214	12.3272	1.25541	0.262522	0.848856
	ENSMUSG00000030245	-0.238201	8.2195	1.25528	0.262547	0.848856
	ENSMUSG00000022623	-0.52687	4.09767	1.25504	0.262592	0.848856
	ENSMUSG00000007617	-0.40423	5.45188	1.25453	0.262689	0.848856
	ENSMUSG00000026630	0.560481	3.84997	1.25359	0.262867	0.848856
	ENSMUSG00000027075	0.680912	4.00931	1.25281	0.263017	0.848856
	ENSMUSG00000027326	0.65332	4.40546	1.25212	0.263148	0.848856
	ENSMUSG00000064267	0.501474	3.89579	1.25171	0.263226	0.848856
	ENSMUSG00000046808	-0.366871	4.22902	1.25068	0.263423	0.848856
	ENSMUSG00000052632	0.404181	4.43649	1.24988	0.263576	0.848856
	ENSMUSG00000038127	-0.183507	9.92815	1.24984	0.263584	0.848856
	ENSMUSG00000024505	-0.366955	3.95654	1.24865	0.26381	0.848856
	ENSMUSG00000039994	0.299623	5.19216	1.24813	0.26391	0.848856
	ENSMUSG00000022639	0.487037	3.83098	1.24802	0.263932	0.848856
	ENSMUSG00000032826	-0.316315	7.97628	1.24791	0.263953	0.848856
	ENSMUSG00000005566	0.294161	5.7243	1.24638	0.264246	0.848856
	ENSMUSG00000054612	-0.433371	5.16055	1.2463	0.26426	0.848856
	ENSMUSG00000028029	-0.233979	5.87506	1.24628	0.264265	0.848856
	ENSMUSG00000028573	0.402538	5.44531	1.24485	0.264538	0.848856
	ENSMUSG00000073910	-0.287578	7.02872	1.24483	0.264543	0.848856
	ENSMUSG00000000278	0.35493	6.92759	1.24384	0.264733	0.848856
	ENSMUSG00000015224	-0.405004	5.24267	1.24332	0.264833	0.848856
	ENSMUSG00000032855	0.277139	6.05968	1.24319	0.264857	0.848856
	ENSMUSG00000037857	-0.279159	6.71929	1.23924	0.265617	0.850752
	ENSMUSG00000024597	-0.578101	5.68936	1.23773	0.265909	0.851148
	ENSMUSG00000020664	-0.376644	7.21932	1.23335	0.266756	0.852685
	ENSMUSG00000078484	-0.305086	4.76935	1.23213	0.266993	0.852685
	ENSMUSG00000035545	0.36405	5.51288	1.2318	0.267057	0.852685
	ENSMUSG00000002871	0.24323	5.94253	1.23177	0.267064	0.852685
	ENSMUSG00000004897	-0.318171	6.28929	1.22875	0.26765	0.853449
	ENSMUSG00000035726	0.231039	6.06079	1.22679	0.268033	0.853449
	ENSMUSG00000022516	0.440597	4.61609	1.22643	0.268102	0.853449
	ENSMUSG00000032359	0.335679	8.15733	1.2263	0.268128	0.853449
	ENSMUSG00000027935	0.302122	5.09008	1.22596	0.268194	0.853449
	ENSMUSG00000026604	-0.262647	8.36693	1.22534	0.268315	0.853449
	ENSMUSG00000070867	-0.548276	4.37445	1.22331	0.268711	0.853999
	ENSMUSG00000033439	0.300013	5.425	1.22273	0.268826	0.853999
	ENSMUSG00000059552	0.314976	5.13062	1.22139	0.269089	0.854298
	ENSMUSG00000072621	0.69474	4.19529	1.22022	0.269318	0.854488
	ENSMUSG00000035505	-0.374483	4.3487	1.21696	0.269957	0.855332
	ENSMUSG00000015461	0.27301	6.45089	1.21559	0.270228	0.855332
	ENSMUSG00000048930	0.2869	5.28145	1.21549	0.270248	0.855332
	ENSMUSG00000032422	-0.269538	5.85225	1.21475	0.270393	0.855332
	ENSMUSG00000047222	-0.997576	5.18721	1.21457	0.27043	0.855332
	ENSMUSG00000045382	0.579457	5.37839	1.21263	0.270812	0.856005
	ENSMUSG00000034187	0.273087	5.28811	1.20922	0.271486	0.857068
	ENSMUSG00000036372	0.514388	4.03025	1.20922	0.271487	0.857068
	ENSMUSG00000053333	0.39567	4.37926	1.20702	0.271923	0.857664
	ENSMUSG00000005034	-0.312155	5.87876	1.20656	0.272015	0.857664
	ENSMUSG00000020097	0.21318	8.35404	1.20516	0.272292	0.858004
	ENSMUSG00000023021	0.205031	7.63729	1.20299	0.272725	0.858019
	ENSMUSG00000097330	-0.347032	5.84327	1.20203	0.272917	0.858019
	ENSMUSG00000028264	0.618442	3.95692	1.20183	0.272955	0.858019
	ENSMUSG00000024052	0.350416	6.5671	1.20173	0.272975	0.858019
	ENSMUSG00000024524	0.315045	4.43737	1.20027	0.273267	0.858403
	ENSMUSG00000020186	-0.466721	7.30509	1.19912	0.273498	0.858595
	ENSMUSG00000028890	0.339609	4.56883	1.19668	0.273986	0.859111
	ENSMUSG00000055024	0.323041	5.29798	1.19551	0.274222	0.859111
	ENSMUSG00000024556	0.262523	5.80546	1.19484	0.274355	0.859111
	ENSMUSG00000033396	0.169883	7.36674	1.19355	0.274615	0.859111
	ENSMUSG00000028159	0.397318	4.46975	1.19193	0.274941	0.859111
	ENSMUSG00000073664	-0.209196	8.48878	1.1904	0.275249	0.859111
	ENSMUSG00000038206	-0.289111	5.40443	1.18967	0.275397	0.859111
	ENSMUSG00000026618	-0.207065	9.18996	1.18921	0.275489	0.859111
	ENSMUSG00000032026	-0.241737	6.85822	1.18778	0.275779	0.859111
	ENSMUSG00000038806	0.241028	6.68095	1.18691	0.275954	0.859111
	ENSMUSG00000022529	0.293496	5.27113	1.1847	0.2764	0.859111
	ENSMUSG00000038773	0.3089	5.04613	1.1843	0.276483	0.859111
	ENSMUSG00000041268	-0.249168	7.40918	1.18427	0.276488	0.859111
	ENSMUSG00000035376	0.424115	5.30812	1.18364	0.276615	0.859111
	ENSMUSG00000022752	-0.217114	8.28291	1.18345	0.276656	0.859111
	ENSMUSG00000084911	-0.384169	6.37941	1.18342	0.27666	0.859111
	ENSMUSG00000026305	0.235779	7.79921	1.18289	0.276769	0.859111
	ENSMUSG00000032462	-0.339493	6.52693	1.18245	0.276859	0.859111
	ENSMUSG00000024713	0.301656	6.07828	1.18106	0.277141	0.859111
	ENSMUSG00000031709	0.436448	6.80917	1.1798	0.277396	0.859111
	ENSMUSG00000025351	0.264614	7.73754	1.17919	0.277521	0.859111
	ENSMUSG00000044788	0.528953	4.25031	1.17712	0.277944	0.859111
	ENSMUSG00000020982	-0.224066	6.57596	1.17702	0.277963	0.859111
	ENSMUSG00000074925	0.288584	5.73097	1.17662	0.278046	0.859111
	ENSMUSG00000029550	0.237954	6.239	1.175	0.278377	0.859111
	ENSMUSG00000031858	-0.544942	3.61636	1.17475	0.278427	0.859111
	ENSMUSG00000020849	-0.309845	6.21634	1.17281	0.278825	0.859111
	ENSMUSG00000018398	0.210984	8.39916	1.17229	0.278931	0.859111
	ENSMUSG00000024220	0.323799	5.60327	1.17099	0.279197	0.859111
	ENSMUSG00000026245	-0.217779	7.44333	1.17039	0.279322	0.859111
	ENSMUSG00000028514	0.193223	7.1003	1.16816	0.27978	0.859111
	ENSMUSG00000027630	-0.197303	6.78916	1.16813	0.279786	0.859111
	ENSMUSG00000037553	0.220182	6.7087	1.16749	0.279918	0.859111
	ENSMUSG00000003810	0.331067	4.92442	1.16731	0.279955	0.859111
	ENSMUSG00000036528	0.311542	6.05713	1.16668	0.280085	0.859111
	ENSMUSG00000030435	0.22178	6.31013	1.1664	0.280142	0.859111
	ENSMUSG00000049687	0.324101	4.98412	1.16604	0.280216	0.859111
	ENSMUSG00000015647	0.53482	5.70185	1.16545	0.280338	0.859111
	ENSMUSG00000028480	0.331228	6.8656	1.16492	0.280447	0.859111
	ENSMUSG00000032064	-0.484192	4.88838	1.16487	0.280458	0.859111
	ENSMUSG00000026623	-0.315835	6.91664	1.16331	0.28078	0.85955
	ENSMUSG00000032515	-0.58426	5.58273	1.16098	0.281262	0.85955
	ENSMUSG00000040822	-0.307447	5.2841	1.16098	0.281263	0.85955
	ENSMUSG00000027253	0.662106	5.0215	1.16052	0.281357	0.85955
	ENSMUSG00000036737	-0.165653	8.42826	1.15973	0.281521	0.85955
	ENSMUSG00000002496	0.428426	4.11456	1.15925	0.281621	0.85955
	ENSMUSG00000030787	-0.396107	7.44944	1.15698	0.282093	0.860472
	ENSMUSG00000022231	-0.428976	6.92319	1.15391	0.282732	0.860526
	ENSMUSG00000035697	0.397613	4.38703	1.1536	0.282796	0.860526
	ENSMUSG00000086291	0.440047	4.87347	1.15192	0.283149	0.860526
	ENSMUSG00000018861	0.30734	5.52834	1.15149	0.283238	0.860526
	ENSMUSG00000054717	0.597057	3.59101	1.14835	0.283895	0.860526
	ENSMUSG00000082536	-0.194376	6.92126	1.14568	0.284454	0.860526
	ENSMUSG00000030045	-0.253212	5.42117	1.14564	0.284465	0.860526
	ENSMUSG00000045962	0.273121	6.3983	1.14544	0.284506	0.860526
	ENSMUSG00000018740	-0.467542	4.91968	1.14511	0.284576	0.860526
	ENSMUSG00000047037	0.425366	4.3689	1.14491	0.284617	0.860526
	ENSMUSG00000029726	0.317715	5.71297	1.1442	0.284767	0.860526
	ENSMUSG00000038271	0.418982	4.03124	1.14325	0.284968	0.860526
	ENSMUSG00000041733	-0.283245	6.02739	1.14254	0.285117	0.860526
	ENSMUSG00000026782	-0.325722	5.75329	1.14158	0.285318	0.860526
	ENSMUSG00000005161	-0.177842	7.89473	1.14126	0.285385	0.860526
	ENSMUSG00000002732	-0.241874	6.35046	1.1396	0.285737	0.860526
	ENSMUSG00000051674	-0.424292	3.85607	1.13929	0.285803	0.860526
	ENSMUSG00000030513	-0.465345	6.77534	1.13925	0.28581	0.860526
	ENSMUSG00000018217	-0.235896	8.30623	1.13854	0.285961	0.860526
	ENSMUSG00000074211	0.414707	3.7862	1.13662	0.286369	0.860526
	ENSMUSG00000040462	0.205652	8.66501	1.13656	0.28638	0.860526
	ENSMUSG00000028788	0.163874	9.28706	1.13614	0.28647	0.860526
	ENSMUSG00000036693	0.391608	4.44044	1.13591	0.286519	0.860526
	ENSMUSG00000021156	-0.161002	9.18045	1.13432	0.286855	0.860526
	ENSMUSG00000053929	-0.213679	6.51775	1.13346	0.287038	0.860526
	ENSMUSG00000001930	0.358272	7.05253	1.13318	0.287097	0.860526
	ENSMUSG00000047875	0.306603	5.3639	1.13247	0.287249	0.860526
	ENSMUSG00000058297	-0.603759	6.98281	1.13187	0.287376	0.860526
	ENSMUSG00000046731	0.289107	5.77007	1.13142	0.287473	0.860526
	ENSMUSG00000025903	-0.21667	7.66566	1.13017	0.28774	0.860526
	ENSMUSG00000040940	0.382355	4.25948	1.12911	0.287965	0.860526
	ENSMUSG00000022884	-0.214304	8.56736	1.12903	0.287981	0.860526
	ENSMUSG00000038888	0.416114	4.42995	1.1286	0.288073	0.860526
	ENSMUSG00000030423	-0.265693	5.23667	1.12748	0.288313	0.860526
	ENSMUSG00000022179	-0.471377	3.64988	1.12687	0.288444	0.860526
	ENSMUSG00000051316	-0.534161	3.55522	1.12597	0.288637	0.860526
	ENSMUSG00000042167	0.280177	5.63722	1.12592	0.288647	0.860526
	ENSMUSG00000033282	-0.526149	3.93658	1.12386	0.289089	0.860526
	ENSMUSG00000081058	0.494275	5.25692	1.1213	0.289638	0.860526
	ENSMUSG00000033697	0.410872	4.29956	1.12071	0.289765	0.860526
	ENSMUSG00000040242	-0.143819	8.82847	1.11847	0.290247	0.860526
	ENSMUSG00000071796	0.505671	3.69377	1.11835	0.290273	0.860526
	ENSMUSG00000092341	0.234587	13.445	1.11744	0.29047	0.860526
	ENSMUSG00000034343	-0.234886	6.43279	1.11552	0.290886	0.860526
	ENSMUSG00000033450	-0.642828	5.53755	1.11528	0.290937	0.860526
	ENSMUSG00000003534	-0.323293	7.33571	1.11527	0.290939	0.860526
	ENSMUSG00000030298	0.280374	6.51188	1.11448	0.291109	0.860526
	ENSMUSG00000026031	-0.364891	4.76153	1.11405	0.291204	0.860526
	ENSMUSG00000027254	0.361679	7.48078	1.11396	0.291223	0.860526
	ENSMUSG00000049881	0.222427	6.16521	1.11263	0.291511	0.860526
	ENSMUSG00000028692	0.190731	8.02843	1.11182	0.291687	0.860526
	ENSMUSG00000019647	-0.414028	5.11021	1.11114	0.291835	0.860526
	ENSMUSG00000019920	-0.372819	7.15612	1.1098	0.292126	0.860526
	ENSMUSG00000040732	-0.345474	5.07451	1.10976	0.292135	0.860526
	ENSMUSG00000003665	1.00134	3.85642	1.10872	0.29236	0.860526
	ENSMUSG00000006498	-0.204559	7.92678	1.10815	0.292485	0.860526
	ENSMUSG00000025931	-0.395156	4.55808	1.10691	0.292755	0.860526
	ENSMUSG00000007039	0.348155	4.55778	1.10675	0.292789	0.860526
	ENSMUSG00000000600	-0.203856	6.34226	1.10649	0.292846	0.860526
	ENSMUSG00000023827	0.408108	6.07953	1.10567	0.293025	0.860526
	ENSMUSG00000031447	0.244096	11.6385	1.10537	0.293091	0.860526
	ENSMUSG00000028798	0.195413	7.63322	1.10294	0.293622	0.860526
	ENSMUSG00000029038	0.205722	6.46126	1.10292	0.293626	0.860526
	ENSMUSG00000023267	0.559345	5.31418	1.10246	0.293726	0.860526
	ENSMUSG00000024098	-0.368126	6.40087	1.10221	0.293782	0.860526
	ENSMUSG00000044847	0.309287	5.33915	1.10038	0.294184	0.860526
	ENSMUSG00000034940	-0.312717	5.19655	1.09977	0.294316	0.860526
	ENSMUSG00000010554	-0.227444	6.41373	1.09968	0.294337	0.860526
	ENSMUSG00000025316	0.333611	5.54376	1.09947	0.294382	0.860526
	ENSMUSG00000003545	-1.19752	4.09213	1.09896	0.294494	0.860526
	ENSMUSG00000036242	-0.396333	5.0563	1.09778	0.294753	0.860526
	ENSMUSG00000078380	0.623208	3.91518	1.09703	0.294919	0.860526
	ENSMUSG00000031703	-0.221299	6.51079	1.09682	0.294966	0.860526
	ENSMUSG00000031792	0.260738	5.40001	1.09676	0.294978	0.860526
	ENSMUSG00000042605	-0.372965	4.19184	1.09623	0.295095	0.860526
	ENSMUSG00000009894	-0.215678	6.81666	1.09536	0.295287	0.860526
	ENSMUSG00000018858	-0.232078	5.73686	1.09505	0.295354	0.860526
	ENSMUSG00000017548	-0.356754	5.35799	1.09493	0.295382	0.860526
	ENSMUSG00000041773	-0.325055	8.00029	1.09192	0.296047	0.86149
	ENSMUSG00000032531	-0.285585	8.95895	1.09188	0.296054	0.86149
	ENSMUSG00000054387	-0.321883	5.8684	1.08991	0.296492	0.862021
	ENSMUSG00000030629	-0.251891	5.70394	1.08952	0.296577	0.862021
	ENSMUSG00000039756	-0.244281	5.7584	1.08684	0.297172	0.86288
	ENSMUSG00000017550	-0.343058	4.60906	1.08606	0.297347	0.86288
	ENSMUSG00000053647	0.316731	4.72495	1.08514	0.297551	0.86288
	ENSMUSG00000039410	0.660417	3.77868	1.08479	0.297629	0.86288
	ENSMUSG00000058799	-0.202886	9.33826	1.08435	0.297726	0.86288
	ENSMUSG00000075229	-0.36455	3.97081	1.08191	0.29827	0.863606
	ENSMUSG00000032534	-0.27999	5.51166	1.08052	0.298582	0.863606
	ENSMUSG00000044328	0.492563	3.99077	1.08042	0.298604	0.863606
	ENSMUSG00000027208	-0.464851	4.48657	1.079	0.298922	0.863606
	ENSMUSG00000056305	-0.40795	4.14314	1.07897	0.298927	0.863606
	ENSMUSG00000042010	-0.679171	8.3772	1.07799	0.299147	0.863606
	ENSMUSG00000021218	-0.188789	9.08154	1.07788	0.299172	0.863606
	ENSMUSG00000023010	-0.273608	5.99996	1.07584	0.29963	0.863954
	ENSMUSG00000026356	-0.213101	6.40639	1.07582	0.299634	0.863954
	ENSMUSG00000010392	-0.227974	5.36065	1.07475	0.299875	0.864157
	ENSMUSG00000059970	-0.669786	3.82644	1.07245	0.300392	0.864669
	ENSMUSG00000035936	-0.32502	5.92529	1.07225	0.300437	0.864669
	ENSMUSG00000022204	-0.188784	6.87796	1.07132	0.300648	0.864669
	ENSMUSG00000039108	-0.266355	6.09623	1.07063	0.300804	0.864669
	ENSMUSG00000052331	0.194802	6.66661	1.07017	0.300908	0.864669
	ENSMUSG00000022515	0.292657	5.44374	1.06839	0.30131	0.864708
	ENSMUSG00000074030	-0.462898	4.788	1.06793	0.301413	0.864708
	ENSMUSG00000022556	-0.345301	4.87337	1.06784	0.301434	0.864708
	ENSMUSG00000085786	-0.623065	3.63396	1.06705	0.301612	0.864727
	ENSMUSG00000041695	0.546214	6.23513	1.06327	0.302472	0.866701
	ENSMUSG00000026820	-0.360321	4.55239	1.0604	0.303125	0.868013
	ENSMUSG00000027803	-0.236956	8.66798	1.05899	0.303446	0.868013
	ENSMUSG00000007041	0.349848	7.47522	1.05856	0.303544	0.868013
	ENSMUSG00000042042	0.205404	6.43476	1.05711	0.303874	0.868013
	ENSMUSG00000053641	0.242295	5.40374	1.05697	0.303908	0.868013
	ENSMUSG00000004473	-0.516865	4.15992	1.05443	0.30449	0.868013
	ENSMUSG00000021715	-0.411482	3.84999	1.05426	0.304528	0.868013
	ENSMUSG00000020300	-0.218203	6.37885	1.05425	0.304531	0.868013
	ENSMUSG00000019437	-0.371035	5.71824	1.05351	0.304701	0.868013
	ENSMUSG00000032322	0.514414	4.32342	1.05328	0.304752	0.868013
	ENSMUSG00000009112	-0.242401	7.26387	1.05262	0.304904	0.868013
	ENSMUSG00000026589	0.298379	5.59139	1.05103	0.305271	0.868013
	ENSMUSG00000027843	0.539516	4.35926	1.05062	0.305364	0.868013
	ENSMUSG00000022941	-0.439802	4.16769	1.04881	0.305781	0.868013
	ENSMUSG00000018669	0.246113	7.73652	1.04871	0.305804	0.868013
	ENSMUSG00000063077	-0.174095	8.74032	1.04758	0.306065	0.868013
	ENSMUSG00000052593	0.298084	5.11532	1.04682	0.306241	0.868013
	ENSMUSG00000034210	-0.185545	7.30182	1.04652	0.306311	0.868013
	ENSMUSG00000027384	-0.318104	5.08051	1.0454	0.306569	0.868013
	ENSMUSG00000038143	0.244047	5.21938	1.04535	0.306581	0.868013
	ENSMUSG00000027247	0.256942	5.29312	1.04408	0.306874	0.868013
	ENSMUSG00000028776	-0.397176	4.87377	1.0438	0.30694	0.868013
	ENSMUSG00000029622	0.270411	10.2366	1.04335	0.307044	0.868013
	ENSMUSG00000074899	0.515594	4.22763	1.04282	0.307166	0.868013
	ENSMUSG00000040688	0.254989	5.58422	1.04216	0.307319	0.868013
	ENSMUSG00000025784	0.288638	7.23353	1.04185	0.307392	0.868013
	ENSMUSG00000022978	0.458315	3.72693	1.04016	0.307783	0.868269
	ENSMUSG00000022664	-0.216828	6.05982	1.03998	0.307826	0.868269
	ENSMUSG00000087153	0.465384	3.69053	1.03837	0.308202	0.868844
	ENSMUSG00000069268	0.540206	4.63999	1.03503	0.30898	0.870554
	ENSMUSG00000027004	0.74172	3.98219	1.03402	0.309215	0.870731
	ENSMUSG00000020440	-0.232018	7.19989	1.03286	0.309488	0.870936
	ENSMUSG00000020189	0.266797	9.3667	1.03224	0.309633	0.870936
	ENSMUSG00000024778	-0.293332	6.88522	1.03082	0.309967	0.871393
	ENSMUSG00000027671	0.223714	5.92228	1.02715	0.310829	0.871635
	ENSMUSG00000020986	-0.173573	8.63106	1.0265	0.310982	0.871635
	ENSMUSG00000024308	0.21701	10.6344	1.02603	0.311093	0.871635
	ENSMUSG00000021466	-0.347278	4.95523	1.02593	0.311118	0.871635
	ENSMUSG00000026669	0.543932	4.21741	1.02563	0.311188	0.871635
	ENSMUSG00000056268	0.407889	4.32995	1.02547	0.311224	0.871635
	ENSMUSG00000035168	0.34308	5.07389	1.02525	0.311278	0.871635
	ENSMUSG00000028955	-0.188466	8.99808	1.02352	0.311685	0.871635
	ENSMUSG00000003099	0.262161	5.63541	1.02346	0.311699	0.871635
	ENSMUSG00000047867	-0.204934	7.38351	1.0217	0.312117	0.871635
	ENSMUSG00000043964	0.490862	3.73949	1.02133	0.312204	0.871635
	ENSMUSG00000060671	0.24614	5.94652	1.02091	0.312304	0.871635
	ENSMUSG00000060739	-0.301495	5.7257	1.01904	0.312747	0.871635
	ENSMUSG00000027639	0.24552	8.15129	1.01852	0.31287	0.871635
	ENSMUSG00000038525	-0.19248	7.5176	1.0181	0.312971	0.871635
	ENSMUSG00000029470	0.305032	5.28236	1.01665	0.313315	0.871635
	ENSMUSG00000055932	0.315077	5.3262	1.01613	0.313439	0.871635
	ENSMUSG00000018574	0.485622	3.60788	1.01607	0.313453	0.871635
	ENSMUSG00000020988	-0.445609	3.69331	1.01503	0.3137	0.871635
	ENSMUSG00000003746	-0.273534	8.53094	1.01456	0.313814	0.871635
	ENSMUSG00000039183	0.208736	5.62518	1.01364	0.314033	0.871635
	ENSMUSG00000033174	-0.292593	8.6514	1.01283	0.314226	0.871635
	ENSMUSG00000042348	-0.224343	5.87143	1.01214	0.314391	0.871635
	ENSMUSG00000028860	-0.561993	4.82357	1.01144	0.314559	0.871635
	ENSMUSG00000074165	-0.476617	3.7977	1.0099	0.314928	0.871635
	ENSMUSG00000030161	-0.190309	8.26387	1.0098	0.314952	0.871635
	ENSMUSG00000019122	0.53285	9.17443	1.00854	0.315253	0.871635
	ENSMUSG00000005483	-0.339593	5.67443	1.00816	0.315343	0.871635
	ENSMUSG00000024993	-0.400249	4.12926	1.00617	0.315821	0.871635
	ENSMUSG00000036019	-0.389097	5.58204	1.00521	0.316054	0.871635
	ENSMUSG00000006920	0.501569	3.49751	1.00491	0.316124	0.871635
	ENSMUSG00000038244	0.299819	8.1294	1.00491	0.316124	0.871635
	ENSMUSG00000032397	-0.419686	3.97637	1.00371	0.316416	0.871635
	ENSMUSG00000021143	0.238642	5.93527	1.00231	0.316752	0.871635
	ENSMUSG00000073421	0.391131	10.8473	1.00192	0.316848	0.871635
	ENSMUSG00000055485	0.189744	8.2657	1.00186	0.316861	0.871635
	ENSMUSG00000030166	0.383205	4.24138	1.00046	0.317199	0.871635
	ENSMUSG00000073542	-0.281127	5.23495	1.00028	0.317244	0.871635
	ENSMUSG00000042363	-0.237594	6.76355	0.999539	0.317422	0.871635
	ENSMUSG00000033102	0.529698	3.71078	0.999192	0.317506	0.871635
	ENSMUSG00000000275	0.241194	7.65972	0.99752	0.317911	0.871635
	ENSMUSG00000039449	0.175913	6.21105	0.997293	0.317967	0.871635
	ENSMUSG00000021000	-0.182082	7.10697	0.997016	0.318034	0.871635
	ENSMUSG00000073455	-0.309489	4.69148	0.996915	0.318058	0.871635
	ENSMUSG00000039960	-0.570799	3.8223	0.996054	0.318267	0.871635
	ENSMUSG00000098098	-0.733294	5.40326	0.995896	0.318306	0.871635
	ENSMUSG00000038418	-1.06181	4.61832	0.995882	0.318309	0.871635
	ENSMUSG00000045287	-0.291525	5.15399	0.995548	0.31839	0.871635
	ENSMUSG00000022876	0.461183	4.37348	0.994847	0.318561	0.871635
	ENSMUSG00000033991	0.181412	7.16872	0.994241	0.318708	0.871635
	ENSMUSG00000022749	0.163076	7.84189	0.993686	0.318843	0.871635
	ENSMUSG00000033233	-0.696698	4.2529	0.991835	0.319294	0.872397
	ENSMUSG00000033161	0.417785	7.6142	0.988714	0.320057	0.872746
	ENSMUSG00000029629	0.29095	4.96857	0.987661	0.320315	0.872746
	ENSMUSG00000006403	0.684014	4.4385	0.987078	0.320458	0.872746
	ENSMUSG00000041702	-0.196153	7.58511	0.985007	0.320966	0.872746
	ENSMUSG00000044475	0.308781	5.33524	0.984265	0.321148	0.872746
	ENSMUSG00000036078	-0.262216	6.14171	0.983937	0.321229	0.872746
	ENSMUSG00000032254	0.423143	3.93431	0.98385	0.32125	0.872746
	ENSMUSG00000033933	0.309848	6.74989	0.983383	0.321365	0.872746
	ENSMUSG00000020843	-0.228601	5.38747	0.981588	0.321807	0.872746
	ENSMUSG00000032078	0.365839	3.89455	0.981415	0.32185	0.872746
	ENSMUSG00000020184	0.201892	7.78803	0.980473	0.322082	0.872746
	ENSMUSG00000057894	0.255097	5.93953	0.979981	0.322203	0.872746
	ENSMUSG00000060636	0.196698	9.119	0.978687	0.322523	0.872746
	ENSMUSG00000078502	0.617187	4.40715	0.978587	0.322548	0.872746
	ENSMUSG00000039886	-0.434942	7.68674	0.978533	0.322561	0.872746
	ENSMUSG00000038400	-0.466206	8.709	0.978279	0.322624	0.872746
	ENSMUSG00000063286	0.284099	4.852	0.978125	0.322662	0.872746
	ENSMUSG00000034459	-0.69246	5.36025	0.977297	0.322867	0.872746
	ENSMUSG00000044042	0.258544	5.8538	0.976451	0.323077	0.872746
	ENSMUSG00000037426	-0.35861	4.35648	0.975597	0.323288	0.872746
	ENSMUSG00000023007	-0.302594	4.9685	0.975514	0.323309	0.872746
	ENSMUSG00000020654	0.280672	6.31629	0.97474	0.323501	0.872746
	ENSMUSG00000022707	-0.400969	8.62935	0.973388	0.323837	0.872746
	ENSMUSG00000054894	-0.285823	4.47007	0.973261	0.323868	0.872746
	ENSMUSG00000050043	-0.307992	5.20852	0.973118	0.323904	0.872746
	ENSMUSG00000029676	-0.364281	4.65454	0.973019	0.323928	0.872746
	ENSMUSG00000016619	0.23492	5.99393	0.971916	0.324203	0.872746
	ENSMUSG00000030846	-0.327515	4.94809	0.971092	0.324408	0.872746
	ENSMUSG00000027784	-0.418653	5.71087	0.97091	0.324453	0.872746
	ENSMUSG00000049657	-0.264125	6.31596	0.970015	0.324676	0.872746
	ENSMUSG00000029722	-0.296265	7.30233	0.969628	0.324773	0.872746
	ENSMUSG00000064373	0.244221	10.9353	0.968575	0.325036	0.872746
	ENSMUSG00000032841	-0.331302	6.70628	0.968144	0.325143	0.872746
	ENSMUSG00000022901	0.351113	4.70386	0.966992	0.325432	0.872746
	ENSMUSG00000039100	0.231677	5.94265	0.966871	0.325462	0.872746
	ENSMUSG00000020741	-0.332166	8.85475	0.962474	0.326564	0.873578
	ENSMUSG00000038762	0.197217	6.45514	0.962006	0.326682	0.873578
	ENSMUSG00000037072	-0.209806	10.5119	0.961118	0.326905	0.873578
	ENSMUSG00000029913	0.343922	4.34589	0.957151	0.327906	0.873578
	ENSMUSG00000022235	-0.459232	4.70984	0.956837	0.327985	0.873578
	ENSMUSG00000061119	0.288359	6.96745	0.956836	0.327985	0.873578
	ENSMUSG00000056492	-0.263117	8.9694	0.956578	0.328051	0.873578
	ENSMUSG00000032702	-0.243797	7.18661	0.955616	0.328294	0.873578
	ENSMUSG00000034473	-0.188899	6.7048	0.955083	0.328429	0.873578
	ENSMUSG00000035212	0.211451	8.29296	0.953151	0.328919	0.873578
	ENSMUSG00000001946	-0.292486	5.21829	0.951665	0.329296	0.873578
	ENSMUSG00000034342	0.204921	6.18689	0.95143	0.329355	0.873578
	ENSMUSG00000023846	-0.182109	6.80509	0.951425	0.329357	0.873578
	ENSMUSG00000045690	-0.379819	3.58667	0.951339	0.329379	0.873578
	ENSMUSG00000053317	0.211546	7.53281	0.949924	0.329739	0.873578
	ENSMUSG00000032872	-0.187311	8.1209	0.949862	0.329754	0.873578
	ENSMUSG00000045752	0.3674	4.24977	0.949639	0.329811	0.873578
	ENSMUSG00000040312	-0.312588	4.32122	0.949081	0.329953	0.873578
	ENSMUSG00000036202	0.342013	4.47702	0.948735	0.330041	0.873578
	ENSMUSG00000029617	-0.196948	6.33386	0.948593	0.330078	0.873578
	ENSMUSG00000024182	0.206916	5.88202	0.948539	0.330091	0.873578
	ENSMUSG00000001687	-0.168887	7.86155	0.947847	0.330268	0.873578
	ENSMUSG00000061559	0.22618	5.65738	0.947466	0.330365	0.873578
	ENSMUSG00000051285	-0.392666	4.33674	0.946796	0.330536	0.873578
	ENSMUSG00000040710	0.408405	6.20115	0.945898	0.330766	0.873578
	ENSMUSG00000050310	-0.196918	6.61037	0.94483	0.331039	0.873578
	ENSMUSG00000028223	-0.250775	9.51454	0.9444	0.331149	0.873578
	ENSMUSG00000033767	0.258631	5.21129	0.943519	0.331375	0.873578
	ENSMUSG00000028960	-0.177257	7.59745	0.943326	0.331424	0.873578
	ENSMUSG00000030621	-0.552226	3.73492	0.943076	0.331488	0.873578
	ENSMUSG00000000743	0.176164	7.97978	0.942684	0.331589	0.873578
	ENSMUSG00000028277	-0.157114	8.5861	0.941975	0.33177	0.873578
	ENSMUSG00000035969	-0.282411	5.57102	0.941823	0.33181	0.873578
	ENSMUSG00000030966	0.205316	6.06399	0.941714	0.331837	0.873578
	ENSMUSG00000047459	-0.218914	7.98606	0.940861	0.332057	0.873578
	ENSMUSG00000067942	-0.301304	4.871	0.937483	0.332926	0.873578
	ENSMUSG00000032374	0.360862	7.66504	0.936598	0.333154	0.873578
	ENSMUSG00000020034	0.228754	6.62073	0.935578	0.333418	0.873578
	ENSMUSG00000070738	-0.207477	7.14994	0.935294	0.333491	0.873578
	ENSMUSG00000046364	0.195464	9.15421	0.935174	0.333522	0.873578
	ENSMUSG00000032121	-0.327031	4.23676	0.935125	0.333535	0.873578
	ENSMUSG00000028128	-0.393647	8.14826	0.934028	0.333818	0.873578
	ENSMUSG00000053730	0.356673	3.89907	0.933318	0.334002	0.873578
	ENSMUSG00000029672	0.29648	6.10142	0.932492	0.334216	0.873578
	ENSMUSG00000039770	-0.194057	8.89366	0.932187	0.334295	0.873578
	ENSMUSG00000027351	-0.259948	6.12201	0.93169	0.334424	0.873578
	ENSMUSG00000066306	0.240435	6.68391	0.931246	0.334539	0.873578
	ENSMUSG00000062661	0.568183	3.59829	0.930897	0.33463	0.873578
	ENSMUSG00000070939	-0.211521	7.09616	0.93083	0.334647	0.873578
	ENSMUSG00000055401	0.189647	6.24794	0.93055	0.33472	0.873578
	ENSMUSG00000019951	0.244354	7.36681	0.930477	0.334739	0.873578
	ENSMUSG00000040181	-0.276317	7.39494	0.930418	0.334754	0.873578
	ENSMUSG00000028483	-0.227878	6.53184	0.928642	0.335216	0.873586
	ENSMUSG00000027378	-0.467536	3.6065	0.92844	0.335269	0.873586
	ENSMUSG00000014077	-0.207628	11.6291	0.927414	0.335536	0.873586
	ENSMUSG00000027285	-0.179624	5.79212	0.925462	0.336045	0.873586
	ENSMUSG00000040482	-0.333192	4.07173	0.925423	0.336055	0.873586
	ENSMUSG00000097080	0.378745	3.79482	0.925051	0.336152	0.873586
	ENSMUSG00000041797	0.348557	5.83786	0.923049	0.336676	0.873586
	ENSMUSG00000015149	-0.263799	5.64065	0.921696	0.33703	0.873586
	ENSMUSG00000017831	-0.371506	4.3404	0.921573	0.337062	0.873586
	ENSMUSG00000003809	-0.353671	4.82197	0.920936	0.337229	0.873586
	ENSMUSG00000060989	-0.393806	3.60318	0.920528	0.337336	0.873586
	ENSMUSG00000047804	0.221867	5.76937	0.920123	0.337443	0.873586
	ENSMUSG00000024238	0.226301	6.57525	0.919919	0.337496	0.873586
	ENSMUSG00000060550	-0.308962	5.46983	0.91767	0.338088	0.873586
	ENSMUSG00000059248	0.283957	9.29245	0.917612	0.338103	0.873586
	ENSMUSG00000036941	-0.243981	4.9699	0.916495	0.338397	0.873586
	ENSMUSG00000050619	0.22237	6.31488	0.916405	0.338421	0.873586
	ENSMUSG00000017664	0.263174	4.95314	0.916027	0.33852	0.873586
	ENSMUSG00000025132	0.2144	7.86146	0.915858	0.338565	0.873586
	ENSMUSG00000001521	-0.464933	4.03167	0.9146	0.338897	0.873586
	ENSMUSG00000030287	0.209025	9.1324	0.914324	0.33897	0.873586
	ENSMUSG00000034007	-0.247299	6.15375	0.914065	0.339038	0.873586
	ENSMUSG00000038967	-0.282001	6.94858	0.913623	0.339155	0.873586
	ENSMUSG00000037664	-0.331881	5.60784	0.91266	0.339409	0.873586
	ENSMUSG00000073684	-0.246075	5.6897	0.912233	0.339523	0.873586
	ENSMUSG00000084883	-0.416916	4.08815	0.910855	0.339888	0.873586
	ENSMUSG00000021033	-0.321616	10.1024	0.910446	0.339996	0.873586
	ENSMUSG00000042202	0.266313	7.1742	0.910182	0.340066	0.873586
	ENSMUSG00000027506	0.440598	6.46067	0.909305	0.340299	0.873586
	ENSMUSG00000030268	0.738864	5.85485	0.909087	0.340357	0.873586
	ENSMUSG00000061650	0.261264	6.11968	0.908543	0.340501	0.873586
	ENSMUSG00000021188	-0.168209	6.81877	0.907722	0.340719	0.873586
	ENSMUSG00000001366	-0.234276	6.51975	0.906643	0.341007	0.873586
	ENSMUSG00000005465	0.368176	5.28402	0.90639	0.341074	0.873586
	ENSMUSG00000024168	-0.250715	5.7925	0.906288	0.341101	0.873586
	ENSMUSG00000024818	0.411356	4.73636	0.904128	0.341677	0.873586
	ENSMUSG00000032551	-0.30997	5.34615	0.90406	0.341695	0.873586
	ENSMUSG00000019977	-0.229628	5.58932	0.903355	0.341884	0.873586
	ENSMUSG00000027865	-0.18503	6.84899	0.903064	0.341962	0.873586
	ENSMUSG00000072623	-0.228917	5.24723	0.903057	0.341963	0.873586
	ENSMUSG00000031486	0.404134	5.11304	0.902884	0.34201	0.873586
	ENSMUSG00000072946	-0.277206	5.76192	0.902875	0.342012	0.873586
	ENSMUSG00000022124	-0.14102	8.0874	0.900126	0.342748	0.873753
	ENSMUSG00000022974	0.385278	4.14662	0.899431	0.342934	0.873753
	ENSMUSG00000034449	-0.468889	3.68333	0.899235	0.342987	0.873753
	ENSMUSG00000075000	0.215762	5.50996	0.899112	0.34302	0.873753
	ENSMUSG00000033486	0.354856	4.21397	0.898293	0.34324	0.873753
	ENSMUSG00000017670	0.258217	4.81052	0.897778	0.343378	0.873753
	ENSMUSG00000029110	-0.185961	6.51894	0.897273	0.343514	0.873753
	ENSMUSG00000056763	0.292585	5.96291	0.89709	0.343563	0.873753
	ENSMUSG00000090523	-0.272081	6.78198	0.896833	0.343632	0.873753
	ENSMUSG00000008398	0.187821	6.96317	0.896054	0.343842	0.873847
	ENSMUSG00000070871	0.202214	5.85872	0.894467	0.34427	0.874377
	ENSMUSG00000021639	0.316113	4.26873	0.893997	0.344396	0.874377
	ENSMUSG00000047534	0.570609	3.7905	0.891377	0.345105	0.875517
	ENSMUSG00000085091	0.529434	4.84263	0.889806	0.34553	0.875517
	ENSMUSG00000037029	0.165197	7.97835	0.889798	0.345532	0.875517
	ENSMUSG00000022299	-0.217854	6.31265	0.889292	0.345669	0.875517
	ENSMUSG00000038324	0.155166	7.45138	0.889138	0.345711	0.875517
	ENSMUSG00000038502	-0.268403	5.62771	0.888195	0.345967	0.875726
	ENSMUSG00000042292	0.30124	4.52891	0.887123	0.346258	0.876025
[truncated: 3,481 more rows]

## Sheet: Cross.Diet
	Gene	logFC	logCPM	LR	PValue	FDR
	ENSMUSG00000026621	1.72987	8.33854	19.5311	9.89728e-06	0.0482884
	ENSMUSG00000042761	-1.44312	5.01563	15.2481	9.42738e-05	0.166425
	ENSMUSG00000026197	0.839301	5.29467	14.7232	0.000124504	0.166425
	ENSMUSG00000024747	2.02248	7.11648	14.5506	0.000136443	0.166425
	ENSMUSG00000040035	-1.89541	6.29619	13.741	0.000209827	0.172793
	ENSMUSG00000021411	-1.08794	7.58612	13.4828	0.000240757	0.172793
	ENSMUSG00000049281	-2.35156	4.1698	13.4279	0.000247912	0.172793
	ENSMUSG00000021665	1.19946	5.97876	12.9817	0.000314543	0.19183
	ENSMUSG00000023886	-1.35151	5.21118	12.3715	0.000435935	0.236323
	ENSMUSG00000058454	1.08199	5.64398	11.5774	0.000667593	0.297093
	ENSMUSG00000033417	0.852314	4.757	11.5712	0.00066982	0.297093
	ENSMUSG00000030225	1.12505	6.45558	11.2237	0.000807613	0.328359
	ENSMUSG00000005370	0.981782	4.35867	10.9303	0.000946032	0.329811
	ENSMUSG00000017670	0.901674	4.81052	10.9296	0.000946383	0.329811
	ENSMUSG00000027715	1.38745	4.92194	10.7635	0.00103523	0.336724
	ENSMUSG00000028496	-0.94926	6.32228	10.383	0.00127178	0.369387
	ENSMUSG00000029716	2.11246	5.58219	10.361	0.00128708	0.369387
	ENSMUSG00000023150	-1.24487	9.21933	10.2371	0.00137647	0.373095
	ENSMUSG00000052336	1.40405	5.01503	9.8105	0.00173518	0.418313
	ENSMUSG00000029366	0.926138	5.21344	9.80447	0.00174088	0.418313
	ENSMUSG00000026358	3.15623	6.90655	9.63629	0.00190771	0.418313
	ENSMUSG00000024810	-1.57027	5.9116	9.58361	0.00196322	0.418313
	ENSMUSG00000026482	-0.554635	8.93881	9.38398	0.0021889	0.418313
	ENSMUSG00000022878	-1.00172	10.0465	9.29926	0.00229246	0.418313
	ENSMUSG00000041895	0.719301	5.95872	9.19107	0.00243199	0.418313
	ENSMUSG00000029675	-0.856971	6.01311	9.12418	0.00252253	0.418313
	ENSMUSG00000069274	1.24836	6.77445	9.02119	0.00266867	0.418313
	ENSMUSG00000045414	-0.771079	8.13492	8.99744	0.00270357	0.418313
	ENSMUSG00000057751	-1.31027	4.07593	8.98866	0.0027166	0.418313
	ENSMUSG00000042978	1.1165	5.75966	8.91057	0.00283524	0.418313
	ENSMUSG00000050345	-1.1824	3.93146	8.87799	0.00288629	0.418313
	ENSMUSG00000024371	-0.893319	6.43042	8.7777	0.00304935	0.418313
	ENSMUSG00000027559	-1.19056	15.8918	8.75952	0.0030799	0.418313
	ENSMUSG00000031980	-1.35945	7.16773	8.69464	0.00319147	0.418313
	ENSMUSG00000001786	-0.997514	4.37824	8.65701	0.00325805	0.418313
	ENSMUSG00000025780	-0.843212	6.85684	8.65	0.00327062	0.418313
	ENSMUSG00000041773	-0.884691	8.00029	8.64559	0.00327853	0.418313
	ENSMUSG00000040612	-1.16386	5.88765	8.62922	0.00330814	0.418313
	ENSMUSG00000036106	-0.752846	6.45452	8.59974	0.0033621	0.418313
	ENSMUSG00000041199	-1.28075	4.0299	8.56358	0.00342954	0.418313
	ENSMUSG00000049624	0.734904	6.15374	8.49125	0.00356858	0.424656
	ENSMUSG00000001768	0.671576	8.21854	8.42661	0.0036977	0.425056
	ENSMUSG00000039168	0.503658	7.84332	8.38236	0.0037888	0.425056
	ENSMUSG00000028850	0.676983	5.52208	8.36114	0.0038333	0.425056
	ENSMUSG00000028024	1.27424	8.50938	8.26338	0.00404526	0.438592
	ENSMUSG00000038235	-0.58065	7.49711	8.11367	0.00439327	0.443664
	ENSMUSG00000020173	-1.54871	3.93926	8.06144	0.00452171	0.443664
	ENSMUSG00000022636	1.03432	6.07436	7.99271	0.00469661	0.443664
	ENSMUSG00000024481	-1.48794	5.12865	7.97464	0.00474373	0.443664
	ENSMUSG00000003644	1.02996	4.42655	7.94162	0.00483106	0.443664
	ENSMUSG00000020594	-0.776255	5.05166	7.92832	0.00486669	0.443664
	ENSMUSG00000032841	-0.877086	6.70628	7.9258	0.00487349	0.443664
	ENSMUSG00000040950	-0.764768	7.51891	7.90191	0.00493827	0.443664
	ENSMUSG00000038943	1.34975	5.56725	7.87351	0.00501642	0.443664
	ENSMUSG00000021732	-0.712405	7.50965	7.84693	0.0050907	0.443664
	ENSMUSG00000022180	0.803998	6.20134	7.84636	0.00509232	0.443664
	ENSMUSG00000032038	-0.871281	4.38548	7.81245	0.00518874	0.444133
	ENSMUSG00000028128	-1.09159	8.14826	7.72811	0.00543677	0.44902
	ENSMUSG00000050930	-0.931116	4.68737	7.67992	0.00558386	0.44902
	ENSMUSG00000038776	-0.789302	6.84448	7.67936	0.0055856	0.44902
	ENSMUSG00000024187	0.516748	8.56886	7.62617	0.00575272	0.44902
	ENSMUSG00000001630	0.45983	7.46663	7.59998	0.00583688	0.44902
	ENSMUSG00000062417	1.61857	3.84973	7.55233	0.00599325	0.44902
	ENSMUSG00000020818	0.632543	5.75088	7.53717	0.00604389	0.44902
	ENSMUSG00000020315	-0.51946	11.345	7.51376	0.00612293	0.44902
	ENSMUSG00000006304	0.6322	6.80673	7.48441	0.00622354	0.44902
	ENSMUSG00000027076	0.704396	6.507	7.481	0.00623536	0.44902
	ENSMUSG00000020661	0.783154	5.50898	7.42466	0.00643359	0.44902
	ENSMUSG00000007872	-0.76561	9.13938	7.39277	0.00654865	0.44902
	ENSMUSG00000087070	-1.23683	3.91104	7.33701	0.00675493	0.44902
	ENSMUSG00000048376	1.15186	5.59111	7.33396	0.00676639	0.44902
	ENSMUSG00000037902	0.782753	9.4034	7.32029	0.00681803	0.44902
	ENSMUSG00000028884	0.618843	6.05407	7.2963	0.00690966	0.44902
	ENSMUSG00000029234	0.576743	7.46132	7.28563	0.00695084	0.44902
	ENSMUSG00000031592	-0.783103	5.10146	7.22502	0.00718944	0.44902
	ENSMUSG00000029624	0.844211	5.01099	7.20524	0.00726909	0.44902
	ENSMUSG00000027177	-0.548145	9.60227	7.2004	0.00728873	0.44902
	ENSMUSG00000082286	0.664558	6.40434	7.19662	0.0073041	0.44902
	ENSMUSG00000028402	-0.416671	9.38784	7.17962	0.00737361	0.44902
	ENSMUSG00000032026	0.572065	6.85822	7.1509	0.00749265	0.44902
	ENSMUSG00000016487	-0.539852	10.3056	7.12316	0.00760947	0.44902
	ENSMUSG00000069793	0.863804	5.43135	7.0651	0.00785998	0.44902
	ENSMUSG00000034687	-1.37716	4.83611	7.02821	0.00802354	0.44902
	ENSMUSG00000030513	-1.10244	6.77534	7.01688	0.00807448	0.44902
	ENSMUSG00000063931	0.467377	8.07349	7.01051	0.00810328	0.44902
	ENSMUSG00000028459	1.62048	4.90855	7.00368	0.00813424	0.44902
	ENSMUSG00000006273	0.79474	8.19481	6.99834	0.00815851	0.44902
	ENSMUSG00000024074	-0.635718	9.22307	6.94928	0.0083853	0.44902
	ENSMUSG00000020917	1.66896	9.69685	6.93214	0.00846605	0.44902
	ENSMUSG00000038393	-0.701465	12.5366	6.92441	0.00850271	0.44902
	ENSMUSG00000020023	-0.614705	7.90607	6.8883	0.00867619	0.44902
	ENSMUSG00000060093	1.01061	5.59251	6.88296	0.00870214	0.44902
	ENSMUSG00000022305	1.03753	5.24227	6.84996	0.00886432	0.44902
	ENSMUSG00000040479	0.907885	5.59142	6.82412	0.00899348	0.44902
	ENSMUSG00000051748	1.84578	7.27083	6.78064	0.00921519	0.44902
	ENSMUSG00000029765	-0.889848	6.77425	6.7798	0.00921953	0.44902
	ENSMUSG00000022754	0.860275	5.66738	6.77815	0.00922807	0.44902
	ENSMUSG00000037466	1.1348	3.70927	6.73513	0.00945322	0.44902
	ENSMUSG00000052396	1.5982	4.39163	6.69644	0.00966055	0.44902
	ENSMUSG00000002847	0.992578	6.92838	6.69433	0.00967201	0.44902
	ENSMUSG00000000301	1.23609	4.16605	6.68731	0.00971016	0.44902
	ENSMUSG00000044285	-0.542064	7.4776	6.68323	0.00973241	0.44902
	ENSMUSG00000097815	-0.925706	6.41861	6.66581	0.009828	0.44902
	ENSMUSG00000042985	-1.35917	8.79107	6.65984	0.009861	0.44902
	ENSMUSG00000027346	0.537225	6.20084	6.63959	0.00997367	0.44902
	ENSMUSG00000067786	-1.57824	5.53231	6.619	0.0100897	0.44902
	ENSMUSG00000039701	-0.74266	6.78516	6.60753	0.0101548	0.44902
	ENSMUSG00000021670	0.676999	6.03295	6.60714	0.0101571	0.44902
	ENSMUSG00000045328	1.41374	3.56931	6.58608	0.0102779	0.44902
	ENSMUSG00000020458	0.628776	10.255	6.58116	0.0103064	0.44902
	ENSMUSG00000036819	-1.10458	3.78639	6.5662	0.0103933	0.44902
	ENSMUSG00000021807	0.381971	7.89017	6.55852	0.0104383	0.44902
	ENSMUSG00000042055	0.992587	3.85139	6.53079	0.0106023	0.44902
	ENSMUSG00000032782	0.859673	4.35921	6.5089	0.0107336	0.44902
	ENSMUSG00000069265	0.978262	5.79755	6.48432	0.010883	0.44902
	ENSMUSG00000029919	1.56131	5.58499	6.46341	0.0110118	0.44902
	ENSMUSG00000022178	-0.760755	5.22253	6.45348	0.0110735	0.44902
	ENSMUSG00000026288	0.913426	4.66045	6.43401	0.0111956	0.44902
	ENSMUSG00000038725	-1.40276	7.76553	6.42042	0.0112816	0.44902
	ENSMUSG00000064246	1.51386	4.66032	6.41857	0.0112933	0.44902
	ENSMUSG00000032344	1.39343	3.59309	6.40902	0.0113542	0.44902
	ENSMUSG00000024663	0.737207	5.85344	6.40795	0.0113611	0.44902
	ENSMUSG00000046711	1.26445	5.52795	6.40319	0.0113915	0.44902
	ENSMUSG00000031604	0.659319	7.19409	6.39137	0.0114677	0.44902
	ENSMUSG00000002265	-1.30811	7.63603	6.38117	0.0115337	0.44902
	ENSMUSG00000026463	-0.673383	7.60899	6.37161	0.011596	0.44902
	ENSMUSG00000097462	-1.17383	6.07364	6.35032	0.011736	0.450861
	ENSMUSG00000032418	1.4311	10.5786	6.30864	0.0120151	0.456689
	ENSMUSG00000035783	-1.27545	3.70343	6.29204	0.0121281	0.456689
	ENSMUSG00000062808	1.40001	4.81592	6.28261	0.0121929	0.456689
	ENSMUSG00000003099	0.617821	5.63541	6.27257	0.0122621	0.456689
	ENSMUSG00000027282	0.519361	7.24179	6.23345	0.0125359	0.461891
	ENSMUSG00000028909	-0.888076	5.20829	6.21358	0.0126774	0.461891
	ENSMUSG00000050555	0.956929	4.13775	6.21241	0.0126858	0.461891
	ENSMUSG00000072244	-0.708739	4.79676	6.15879	0.013076	0.470547
	ENSMUSG00000031489	-1.42853	8.61765	6.14794	0.0131565	0.470547
	ENSMUSG00000038252	0.720146	5.57236	6.08881	0.0136041	0.470547
	ENSMUSG00000026170	-0.659701	7.03181	6.0522	0.013889	0.470547
	ENSMUSG00000074211	0.895319	3.7862	6.05197	0.0138908	0.470547
	ENSMUSG00000068794	1.2766	3.68268	6.05086	0.0138995	0.470547
	ENSMUSG00000005124	-1.42964	3.67406	6.05055	0.013902	0.470547
	ENSMUSG00000034842	-0.690634	7.47009	6.04778	0.0139238	0.470547
	ENSMUSG00000041577	-0.739948	10.8178	6.04746	0.0139264	0.470547
	ENSMUSG00000030751	0.486333	8.71641	6.03979	0.0139869	0.470547
	ENSMUSG00000046070	1.08821	7.09814	6.0363	0.0140146	0.470547
	ENSMUSG00000003660	-0.393937	8.29426	6.01949	0.0141488	0.470547
	ENSMUSG00000037278	0.872182	4.43675	6.01593	0.0141773	0.470547
	ENSMUSG00000068114	0.575241	5.65805	5.98484	0.0144293	0.474021
	ENSMUSG00000032220	1.0728	6.99419	5.97911	0.0144763	0.474021
	ENSMUSG00000020359	0.788106	4.77085	5.96614	0.0145832	0.474338
	ENSMUSG00000005360	-1.39562	4.24327	5.9454	0.0147557	0.476772
	ENSMUSG00000006850	-1.08229	4.06117	5.91487	0.0150137	0.477499
	ENSMUSG00000020176	-0.518932	7.11278	5.90443	0.0151028	0.477499
	ENSMUSG00000022974	0.927705	4.14662	5.90337	0.0151119	0.477499
	ENSMUSG00000021510	-0.574927	5.55757	5.89665	0.0151697	0.477499
	ENSMUSG00000001552	-0.664542	7.03423	5.81649	0.0158766	0.494253
	ENSMUSG00000056888	1.72573	5.26301	5.81339	0.0159046	0.494253
	ENSMUSG00000055320	-0.544735	7.95629	5.78699	0.0161452	0.498554
	ENSMUSG00000009013	0.938509	3.85744	5.75437	0.0164477	0.504701
	ENSMUSG00000064168	1.22303	4.69879	5.73761	0.0166054	0.506356
	ENSMUSG00000018501	-0.656233	5.71193	5.67562	0.0172023	0.521298
	ENSMUSG00000049502	-0.543828	6.72864	5.66148	0.0173415	0.522274
	ENSMUSG00000085471	1.11481	3.67608	5.6477	0.0174782	0.523163
	ENSMUSG00000020246	-0.931413	3.76046	5.63124	0.0176431	0.524878
	ENSMUSG00000032531	-0.620829	8.95895	5.61388	0.0178187	0.526889
	ENSMUSG00000006517	1.09856	5.64272	5.57138	0.0182564	0.536579
	ENSMUSG00000024053	-0.940795	6.40877	5.53408	0.0186495	0.539639
	ENSMUSG00000048387	-1.18869	6.37354	5.51646	0.0188383	0.539639
	ENSMUSG00000069272	1.1064	5.75897	5.49334	0.019089	0.539639
	ENSMUSG00000020653	-0.431867	7.07556	5.48758	0.019152	0.539639
	ENSMUSG00000036098	-1.03825	4.87914	5.4802	0.0192331	0.539639
	ENSMUSG00000034216	0.518982	6.70071	5.47772	0.0192604	0.539639
	ENSMUSG00000025105	-1.28613	4.51445	5.47058	0.0193392	0.539639
	ENSMUSG00000026321	0.909569	5.32789	5.46957	0.0193504	0.539639
	ENSMUSG00000016458	-1.13631	5.18784	5.46907	0.019356	0.539639
	ENSMUSG00000006494	0.620772	8.51742	5.44345	0.0196418	0.544497
	ENSMUSG00000067106	0.540444	8.18475	5.41996	0.0199078	0.546307
	ENSMUSG00000015837	0.383147	9.0527	5.41357	0.0199809	0.546307
	ENSMUSG00000075254	-0.490554	10.3442	5.40675	0.020059	0.546307
	ENSMUSG00000021708	-0.63221	6.75594	5.39842	0.020155	0.546307
	ENSMUSG00000026782	-0.656859	5.75329	5.38816	0.0202738	0.546492
	ENSMUSG00000006715	1.09565	4.19883	5.36465	0.0205489	0.550864
	ENSMUSG00000029430	0.57789	8.40515	5.33849	0.0208595	0.551566
	ENSMUSG00000028264	1.33949	3.95692	5.33066	0.0209535	0.551566
	ENSMUSG00000028671	1.16772	4.5915	5.3265	0.0210035	0.551566
	ENSMUSG00000069300	1.28696	5.20775	5.32453	0.0210273	0.551566
	ENSMUSG00000058297	-1.26084	6.98281	5.30819	0.0212254	0.553784
	ENSMUSG00000025722	0.841846	3.87374	5.29885	0.0213395	0.553801
	ENSMUSG00000020186	-0.930675	7.30509	5.28867	0.0214646	0.553963
	ENSMUSG00000023915	0.632214	7.07925	5.27991	0.0215729	0.553963
	ENSMUSG00000031503	0.758726	12.1885	5.25428	0.0218929	0.559237
	ENSMUSG00000032802	0.574507	7.6693	5.24146	0.0220547	0.560437
	ENSMUSG00000031517	-1.33101	4.94405	5.21514	0.022391	0.561387
	ENSMUSG00000020914	1.4891	4.67411	5.1988	0.0226025	0.561387
	ENSMUSG00000071337	0.673891	6.01498	5.1762	0.0228983	0.561387
	ENSMUSG00000020484	-0.479711	8.64705	5.1597	0.0231169	0.561387
	ENSMUSG00000031647	1.15676	4.08501	5.15849	0.023133	0.561387
	ENSMUSG00000025586	-0.767802	4.48757	5.15344	0.0232004	0.561387
	ENSMUSG00000032812	0.5694	5.86029	5.14491	0.0233146	0.561387
	ENSMUSG00000021666	0.824762	3.76984	5.11707	0.0236916	0.561387
	ENSMUSG00000027247	0.541036	5.29312	5.10022	0.0239227	0.561387
	ENSMUSG00000028970	-0.529498	6.93641	5.08086	0.0241914	0.561387
	ENSMUSG00000028124	0.508172	7.25389	5.07789	0.0242329	0.561387
	ENSMUSG00000021806	0.65342	7.78894	5.07655	0.0242516	0.561387
	ENSMUSG00000021466	-0.703801	4.95523	5.07476	0.0242766	0.561387
	ENSMUSG00000055782	-0.743262	10.9916	5.07405	0.0242865	0.561387
	ENSMUSG00000014470	0.425615	7.04465	5.07205	0.0243146	0.561387
	ENSMUSG00000009907	0.373563	6.51363	5.07204	0.0243148	0.561387
	ENSMUSG00000020634	-0.900691	4.57179	5.06245	0.0244497	0.561387
	ENSMUSG00000029076	-0.337918	9.76221	5.05992	0.0244854	0.561387
	ENSMUSG00000037280	1.7006	4.49882	5.05076	0.0246151	0.561387
	ENSMUSG00000025795	0.686597	8.73735	5.03422	0.0248513	0.561387
	ENSMUSG00000051950	0.51277	7.64644	5.03341	0.024863	0.561387
	ENSMUSG00000044674	-0.53339	6.22591	5.03231	0.0248787	0.561387
	ENSMUSG00000019872	-0.461056	9.04564	5.02735	0.02495	0.561387
	ENSMUSG00000028270	-0.534614	8.8198	5.02325	0.0250091	0.561387
	ENSMUSG00000017715	0.764052	4.86498	5.02276	0.0250162	0.561387
	ENSMUSG00000022884	-0.431241	8.56736	5.006	0.0252596	0.561387
	ENSMUSG00000066026	-0.42006	9.46556	5.00553	0.0252665	0.561387
	ENSMUSG00000032452	0.782514	5.29567	5.00229	0.0253139	0.561387
	ENSMUSG00000027217	0.967655	4.3383	4.99003	0.0254938	0.562819
	ENSMUSG00000006731	1.301	3.95722	4.98051	0.0256344	0.563375
	ENSMUSG00000002297	0.898821	5.06331	4.96595	0.0258511	0.565588
	ENSMUSG00000038122	-0.561734	6.80618	4.95172	0.0260648	0.567718
	ENSMUSG00000048327	1.24348	4.37068	4.93699	0.0262878	0.568733
	ENSMUSG00000047222	-1.67907	5.18721	4.92548	0.0264634	0.568733
	ENSMUSG00000094320	-1.00487	3.91495	4.92471	0.0264752	0.568733
	ENSMUSG00000027605	1.23795	7.33309	4.91804	0.0265777	0.568733
	ENSMUSG00000020463	-0.529011	5.29488	4.89709	0.0269019	0.571429
	ENSMUSG00000030787	-0.783081	7.44944	4.89151	0.0269891	0.571429
	ENSMUSG00000024168	-0.556089	5.7925	4.88189	0.02714	0.571429
	ENSMUSG00000041559	-1.3648	4.72571	4.87984	0.0271721	0.571429
	ENSMUSG00000025348	0.578139	10.2808	4.86772	0.0273636	0.572986
	ENSMUSG00000027610	0.451811	6.82202	4.85636	0.0275443	0.573395
	ENSMUSG00000029386	-0.811053	4.29296	4.84932	0.027657	0.573395
	ENSMUSG00000029073	0.44759	6.26845	4.84169	0.0277797	0.573395
	ENSMUSG00000050549	0.848323	6.77452	4.83041	0.027962	0.573395
	ENSMUSG00000094947	-0.858035	4.48006	4.82497	0.0280503	0.573395
	ENSMUSG00000045287	-0.61292	5.15399	4.80039	0.0284532	0.573395
	ENSMUSG00000063727	-1.50466	4.38082	4.78883	0.028645	0.573395
	ENSMUSG00000058385	0.921995	6.48964	4.78843	0.0286515	0.573395
	ENSMUSG00000003534	-0.644882	7.33571	4.7862	0.0286887	0.573395
	ENSMUSG00000062593	1.14277	7.69098	4.78197	0.0287591	0.573395
	ENSMUSG00000031523	-0.586183	6.96952	4.77416	0.02889	0.573395
	ENSMUSG00000010554	-0.457589	6.41373	4.76392	0.0290624	0.573395
	ENSMUSG00000028862	-0.593699	7.99152	4.75672	0.029184	0.573395
	ENSMUSG00000078234	-0.947215	4.4945	4.75252	0.0292554	0.573395
	ENSMUSG00000020415	0.931535	4.38316	4.74694	0.0293504	0.573395
	ENSMUSG00000020843	0.504603	5.38747	4.74502	0.0293832	0.573395
	ENSMUSG00000053317	0.463136	7.53281	4.7346	0.0295617	0.573395
	ENSMUSG00000029456	-0.627247	4.98138	4.73147	0.0296156	0.573395
	ENSMUSG00000024283	-0.365281	7.50329	4.73144	0.0296161	0.573395
	ENSMUSG00000031628	0.854081	4.37586	4.7049	0.0300767	0.575403
	ENSMUSG00000054951	0.775531	4.05105	4.70314	0.0301076	0.575403
	ENSMUSG00000095217	1.09468	5.44529	4.69863	0.0301868	0.575403
	ENSMUSG00000057181	-0.648845	4.52181	4.69835	0.0301915	0.575403
	ENSMUSG00000024369	-0.582386	4.9857	4.67751	0.0305601	0.576051
	ENSMUSG00000030203	-0.427	6.7496	4.67058	0.0306835	0.576051
	ENSMUSG00000034282	-1.01755	4.00424	4.66584	0.0307684	0.576051
	ENSMUSG00000089672	1.09072	8.61246	4.66503	0.0307829	0.576051
	ENSMUSG00000000693	0.695342	5.00197	4.66319	0.0308159	0.576051
	ENSMUSG00000071984	-0.785884	7.07862	4.64222	0.0311947	0.580906
	ENSMUSG00000034187	0.52441	5.28811	4.62803	0.0314536	0.583501
	ENSMUSG00000030204	0.378534	6.6902	4.60965	0.0317926	0.585347
	ENSMUSG00000042594	0.730179	4.67682	4.60632	0.0318543	0.585347
	ENSMUSG00000038587	-0.726995	5.63909	4.60023	0.0319676	0.585347
	ENSMUSG00000038437	-0.875291	3.92747	4.59243	0.0321135	0.585347
	ENSMUSG00000027001	-0.553309	5.61678	4.59032	0.032153	0.585347
	ENSMUSG00000064043	-0.814686	3.97737	4.57723	0.0323995	0.587641
	ENSMUSG00000015027	0.562776	6.74082	4.56833	0.0325683	0.588098
	ENSMUSG00000018819	0.805392	6.14492	4.56321	0.0326658	0.588098
	ENSMUSG00000020649	1.07409	4.22197	4.5336	0.0332356	0.592211
	ENSMUSG00000032050	-0.355341	8.75561	4.52927	0.0333198	0.592211
	ENSMUSG00000005125	-0.735339	7.6768	4.51607	0.0335779	0.592211
	ENSMUSG00000053754	-0.461665	6.01759	4.51382	0.0336221	0.592211
	ENSMUSG00000036941	-0.493137	4.9699	4.51052	0.033687	0.592211
	ENSMUSG00000029096	-0.581733	9.39695	4.50777	0.0337413	0.592211
	ENSMUSG00000022361	0.372508	7.40819	4.50428	0.0338101	0.592211
	ENSMUSG00000034667	0.306664	8.44554	4.4987	0.0339207	0.592211
	ENSMUSG00000024927	-0.423341	6.28864	4.49538	0.0339866	0.592211
	ENSMUSG00000027463	-1.10886	4.5958	4.48465	0.0342005	0.593816
	ENSMUSG00000030323	-0.739419	4.931	4.47144	0.034466	0.596304
	ENSMUSG00000018362	0.569979	6.05619	4.46334	0.0346298	0.596486
	ENSMUSG00000045917	0.711655	5.29553	4.45884	0.034721	0.596486
	ENSMUSG00000078249	0.95337	6.69012	4.45025	0.0348962	0.597392
	ENSMUSG00000021701	0.525455	7.58402	4.44369	0.0350305	0.597595
	ENSMUSG00000037936	0.56751	6.87284	4.41977	0.0355247	0.602533
	ENSMUSG00000052837	-1.26571	6.47487	4.41775	0.035567	0.602533
	ENSMUSG00000032652	-0.485803	8.18754	4.40646	0.035803	0.603995
	ENSMUSG00000032294	0.713308	10.2474	4.3994	0.0359515	0.603995
	ENSMUSG00000062646	-0.526762	5.75694	4.39594	0.0360247	0.603995
	ENSMUSG00000022808	0.673131	4.93023	4.38573	0.036241	0.604787
	ENSMUSG00000002083	0.931142	4.39557	4.38203	0.0363198	0.604787
	ENSMUSG00000026142	0.809753	3.82694	4.3684	0.0366113	0.604992
	ENSMUSG00000044145	0.738074	4.26293	4.36369	0.0367127	0.604992
	ENSMUSG00000035901	-0.340653	7.26252	4.36022	0.0367876	0.604992
	ENSMUSG00000048960	-0.495478	8.77523	4.35786	0.0368386	0.604992
	ENSMUSG00000020900	-0.490633	7.61054	4.35262	0.0369521	0.604992
	ENSMUSG00000048218	-0.748494	5.28004	4.3293	0.0374617	0.608839
	ENSMUSG00000000958	0.71216	4.48238	4.32829	0.037484	0.608839
	ENSMUSG00000001525	0.510543	9.43438	4.32477	0.0375615	0.608839
	ENSMUSG00000061068	1.03134	4.85784	4.3128	0.0378266	0.609999
	ENSMUSG00000020380	-0.495319	5.81294	4.29687	0.0381825	0.609999
	ENSMUSG00000001741	-0.602861	5.00407	4.29506	0.0382233	0.609999
	ENSMUSG00000021226	-0.677772	6.24909	4.28996	0.038338	0.609999
	ENSMUSG00000029469	-0.955221	4.66103	4.28499	0.0384503	0.609999
	ENSMUSG00000020476	0.409639	6.21935	4.2833	0.0384886	0.609999
	ENSMUSG00000021215	-0.661789	10.1576	4.28243	0.0385082	0.609999
	ENSMUSG00000028980	-0.483242	8.73179	4.26725	0.0388538	0.611932
	ENSMUSG00000024505	-0.670171	3.95654	4.26606	0.0388811	0.611932
	ENSMUSG00000024079	-0.650221	4.11009	4.25043	0.0392404	0.613918
	ENSMUSG00000039470	-0.790281	4.44086	4.24963	0.0392589	0.613918
	ENSMUSG00000036620	0.457371	5.96701	4.2325	0.0396571	0.617986
	ENSMUSG00000009376	-0.534676	6.7128	4.22757	0.0397724	0.617986
	ENSMUSG00000016918	-0.706466	7.27921	4.20949	0.0401983	0.618787
	ENSMUSG00000027513	-0.89882	8.05686	4.20688	0.0402602	0.618787
	ENSMUSG00000024258	0.634456	4.53946	4.18947	0.0406759	0.618787
	ENSMUSG00000056492	-0.528454	8.9694	4.18943	0.0406767	0.618787
	ENSMUSG00000028327	1.84195	3.98031	4.17248	0.0410855	0.618787
	ENSMUSG00000048442	-1.07876	5.32016	4.16716	0.0412148	0.618787
	ENSMUSG00000022403	-0.603154	6.4624	4.15817	0.0414341	0.618787
	ENSMUSG00000020598	0.988088	5.514	4.15714	0.0414595	0.618787
	ENSMUSG00000028962	0.461917	6.04774	4.15348	0.0415491	0.618787
	ENSMUSG00000036242	-0.743393	5.0563	4.14921	0.0416539	0.618787
	ENSMUSG00000063286	0.58938	4.852	4.13038	0.0421198	0.618787
	ENSMUSG00000054555	0.95029	7.13293	4.12704	0.042203	0.618787
	ENSMUSG00000020437	0.708649	5.83511	4.12596	0.0422301	0.618787
	ENSMUSG00000078517	-0.497351	5.24671	4.11834	0.0424208	0.618787
	ENSMUSG00000081058	0.970052	5.25692	4.11173	0.0425868	0.618787
	ENSMUSG00000033970	0.48495	5.19892	4.11135	0.0425964	0.618787
	ENSMUSG00000015536	0.396621	7.99367	4.10471	0.042764	0.618787
	ENSMUSG00000000957	0.976105	8.15835	4.104	0.0427819	0.618787
	ENSMUSG00000027386	1.18588	6.069	4.09853	0.0429204	0.618787
	ENSMUSG00000063146	0.459809	6.85359	4.08751	0.0432012	0.618787
	ENSMUSG00000031710	-3.77419	7.14075	4.08697	0.0432151	0.618787
	ENSMUSG00000003420	-0.362157	8.99065	4.08188	0.0433453	0.618787
	ENSMUSG00000030244	1.48271	7.1563	4.08162	0.043352	0.618787
	ENSMUSG00000024063	0.94906	3.55415	4.07926	0.0434127	0.618787
	ENSMUSG00000026669	1.13508	4.21741	4.0733	0.0435661	0.618787
	ENSMUSG00000027331	0.884635	3.90593	4.06617	0.0437505	0.618787
	ENSMUSG00000027660	-0.772304	4.20957	4.06448	0.0437941	0.618787
	ENSMUSG00000001143	-0.742548	3.83988	4.06063	0.0438941	0.618787
	ENSMUSG00000052712	0.467145	7.32158	4.05458	0.0440516	0.618787
	ENSMUSG00000015749	-0.432242	6.0695	4.05105	0.0441439	0.618787
	ENSMUSG00000035944	-0.599465	6.37277	4.04165	0.0443905	0.618787
	ENSMUSG00000020534	-0.625097	4.98638	4.03829	0.0444788	0.618787
	ENSMUSG00000052698	-0.46148	8.39632	4.03575	0.0445458	0.618787
	ENSMUSG00000057666	0.664328	9.40611	4.03103	0.0446706	0.618787
	ENSMUSG00000020142	0.561096	5.64404	4.02964	0.0447076	0.618787
	ENSMUSG00000056962	0.697339	4.79064	4.02733	0.0447687	0.618787
	ENSMUSG00000052681	0.459755	7.68988	4.02696	0.0447785	0.618787
	ENSMUSG00000032561	2.07604	4.13205	4.02018	0.0449589	0.618787
	ENSMUSG00000055128	-0.571833	5.31096	4.01441	0.0451129	0.618787
	ENSMUSG00000039740	0.448059	6.5685	4.01207	0.0451758	0.618787
	ENSMUSG00000030424	-0.685673	4.21784	4.01172	0.045185	0.618787
	ENSMUSG00000059248	0.57185	9.29245	4.00859	0.045269	0.618787
	ENSMUSG00000028961	0.749096	7.44708	3.99758	0.0455658	0.618787
	ENSMUSG00000042447	-0.608483	4.06872	3.99508	0.0456332	0.618787
	ENSMUSG00000091498	0.780469	7.00768	3.99496	0.0456365	0.618787
	ENSMUSG00000041695	1.05409	6.23513	3.99095	0.0457454	0.618787
	ENSMUSG00000034297	-0.465196	5.60266	3.98169	0.0459974	0.618787
	ENSMUSG00000036585	-0.59769	10.1257	3.97775	0.0461052	0.618787
	ENSMUSG00000068735	0.807418	4.73909	3.97556	0.0461652	0.618787
	ENSMUSG00000070709	-0.572825	4.63481	3.97309	0.0462329	0.618787
	ENSMUSG00000097379	-0.840576	3.85072	3.97093	0.0462921	0.618787
	ENSMUSG00000049878	0.408485	6.47058	3.96463	0.0464657	0.619409
	ENSMUSG00000028149	0.534635	4.75966	3.93043	0.0474199	0.629065
	ENSMUSG00000046223	0.924653	4.81275	3.92488	0.0475765	0.629065
	ENSMUSG00000005873	0.527604	5.65049	3.91377	0.0478921	0.629065
	ENSMUSG00000018774	1.01757	8.97383	3.91192	0.0479447	0.629065
	ENSMUSG00000025816	0.810589	4.58392	3.90959	0.0480113	0.629065
	ENSMUSG00000057789	0.882996	3.6787	3.90244	0.0482159	0.629065
	ENSMUSG00000040253	-0.370248	8.33684	3.90228	0.0482205	0.629065
	ENSMUSG00000052192	-0.593065	4.48329	3.89996	0.0482874	0.629065
	ENSMUSG00000043962	-0.508495	4.9816	3.89361	0.0484702	0.629065
	ENSMUSG00000049672	-0.435804	7.18961	3.89329	0.0484794	0.629065
	ENSMUSG00000020263	0.521681	5.76426	3.88197	0.0488074	0.630094
	ENSMUSG00000095788	1.62635	4.20467	3.88164	0.048817	0.630094
	ENSMUSG00000034940	-0.551021	5.19655	3.87508	0.0490081	0.630239
	ENSMUSG00000024924	0.382932	8.61729	3.86886	0.0491899	0.630239
	ENSMUSG00000037544	1.46449	3.89891	3.86622	0.0492674	0.630239
	ENSMUSG00000097451	-0.717207	4.39642	3.86358	0.0493449	0.630239
	ENSMUSG00000032263	-0.43065	7.55634	3.834	0.050223	0.63417
	ENSMUSG00000073617	-0.431889	5.26231	3.83003	0.0503421	0.63417
	ENSMUSG00000048280	-0.624673	4.99271	3.8218	0.05059	0.63417
	ENSMUSG00000024985	-0.843228	3.95257	3.82088	0.0506176	0.63417
	ENSMUSG00000001270	0.976811	6.34555	3.81226	0.0508789	0.63417
	ENSMUSG00000025154	0.785919	6.11394	3.81164	0.0508977	0.63417
	ENSMUSG00000030671	-0.517485	10.4169	3.81069	0.0509265	0.63417
	ENSMUSG00000045038	-0.643738	6.16764	3.80985	0.050952	0.63417
	ENSMUSG00000029816	1.53396	9.61694	3.80737	0.0510275	0.63417
	ENSMUSG00000031951	-1.04337	3.86402	3.8044	0.0511182	0.63417
	ENSMUSG00000037857	-0.471068	6.71929	3.80057	0.0512352	0.63417
	ENSMUSG00000021190	0.72515	7.17131	3.79515	0.0514012	0.63417
	ENSMUSG00000026596	0.803422	3.99619	3.79494	0.0514076	0.63417
	ENSMUSG00000061615	1.1972	6.09212	3.79283	0.0514724	0.63417
	ENSMUSG00000038633	0.538793	9.40083	3.7833	0.0517664	0.634737
	ENSMUSG00000020354	-0.695764	4.73811	3.78291	0.0517786	0.634737
	ENSMUSG00000040699	0.409092	6.39541	3.7753	0.0520145	0.636031
	ENSMUSG00000035459	1.27053	5.9288	3.7698	0.0521859	0.636531
	ENSMUSG00000033955	-0.583004	5.72426	3.75159	0.0527573	0.639931
	ENSMUSG00000026657	0.650608	4.35635	3.75147	0.0527611	0.639931
	ENSMUSG00000028469	-0.562759	5.09692	3.73787	0.0531923	0.639931
	ENSMUSG00000054612	-0.695884	5.16055	3.73491	0.0532864	0.639931
	ENSMUSG00000032112	0.486339	5.51391	3.73464	0.0532951	0.639931
	ENSMUSG00000021182	0.705852	5.49009	3.73399	0.0533158	0.639931
	ENSMUSG00000089942	1.00048	4.62951	3.72645	0.0535572	0.639931
	ENSMUSG00000059901	0.77904	4.7189	3.72095	0.0537339	0.639931
	ENSMUSG00000050103	-0.457011	6.89155	3.72013	0.0537602	0.639931
	ENSMUSG00000030754	0.313981	8.09757	3.71963	0.0537762	0.639931
	ENSMUSG00000004500	0.531232	4.41063	3.70598	0.0542177	0.642301
	ENSMUSG00000034300	-0.623131	4.16536	3.70179	0.054354	0.642301
	ENSMUSG00000052565	0.727335	7.31575	3.70129	0.0543704	0.642301
	ENSMUSG00000020580	-0.529668	8.11915	3.68288	0.0549737	0.645996
	ENSMUSG00000059049	1.19835	4.65206	3.67114	0.0553623	0.645996
	ENSMUSG00000021115	0.369047	6.54627	3.67018	0.0553941	0.645996
	ENSMUSG00000044795	-0.417065	6.19415	3.66587	0.0555375	0.645996
	ENSMUSG00000028104	-0.569823	6.07231	3.66106	0.0556983	0.645996
	ENSMUSG00000023845	-0.331646	8.22685	3.65654	0.0558495	0.645996
	ENSMUSG00000029038	0.366069	6.46126	3.65588	0.0558715	0.645996
	ENSMUSG00000061991	0.929048	6.65169	3.64808	0.0561339	0.645996
	ENSMUSG00000054793	-0.891438	3.96561	3.64761	0.0561496	0.645996
	ENSMUSG00000027423	0.637259	5.24165	3.64545	0.0562227	0.645996
	ENSMUSG00000028184	0.672162	4.71318	3.63157	0.0566934	0.645996
	ENSMUSG00000073155	0.398194	6.80077	3.63063	0.0567253	0.645996
	ENSMUSG00000048677	0.621216	6.20987	3.62831	0.0568045	0.645996
	ENSMUSG00000098112	1.12374	3.65737	3.62808	0.0568124	0.645996
	ENSMUSG00000028701	-1.07997	3.76003	3.62687	0.0568538	0.645996
	ENSMUSG00000073468	0.635194	5.20158	3.62527	0.0569084	0.645996
	ENSMUSG00000033222	0.409007	5.94405	3.62452	0.056934	0.645996
	ENSMUSG00000011114	-0.410508	5.43346	3.61435	0.057283	0.64827
	ENSMUSG00000029701	0.777351	6.45135	3.61095	0.0574002	0.64827
	ENSMUSG00000018750	-0.440111	8.29985	3.59677	0.057892	0.652315
	ENSMUSG00000052798	0.392093	5.93402	3.56684	0.0589444	0.662642
	ENSMUSG00000008475	0.472084	9.24146	3.56021	0.0591803	0.663765
	ENSMUSG00000036086	0.903017	3.93408	3.53616	0.0600444	0.668776
	ENSMUSG00000021748	0.824078	7.89802	3.53124	0.0602228	0.668776
	ENSMUSG00000031075	-0.946498	7.68814	3.52858	0.0603194	0.668776
	ENSMUSG00000028243	-0.473754	6.22803	3.52802	0.0603397	0.668776
	ENSMUSG00000026991	-0.570333	5.49342	3.52522	0.0604416	0.668776
	ENSMUSG00000082209	0.434829	6.7229	3.52501	0.0604495	0.668776
	ENSMUSG00000038578	-0.679348	4.50787	3.5012	0.0613244	0.674364
	ENSMUSG00000082361	-0.968291	7.04613	3.49423	0.0615829	0.674364
	ENSMUSG00000054520	0.666743	6.81393	3.48869	0.0617895	0.674364
	ENSMUSG00000032702	-0.442856	7.18661	3.4844	0.0619497	0.674364
	ENSMUSG00000006585	0.782214	4.90298	3.48048	0.0620967	0.674364
	ENSMUSG00000022557	0.589904	4.59316	3.47888	0.0621567	0.674364
	ENSMUSG00000017774	-0.416272	9.78336	3.47785	0.0621955	0.674364
	ENSMUSG00000022469	-0.733508	6.72019	3.47726	0.0622176	0.674364
	ENSMUSG00000045210	-0.744224	3.81775	3.47318	0.0623715	0.674364
	ENSMUSG00000092223	0.438174	6.2919	3.47143	0.0624374	0.674364
	ENSMUSG00000040263	0.380064	6.76618	3.46623	0.062634	0.674364
	ENSMUSG00000026031	-0.630282	4.76153	3.46314	0.0627509	0.674364
	ENSMUSG00000004815	0.44162	5.65947	3.46248	0.0627761	0.674364
	ENSMUSG00000004880	0.561754	4.70217	3.45566	0.0630355	0.674364
	ENSMUSG00000038244	0.537315	8.1294	3.44676	0.063376	0.674364
	ENSMUSG00000049657	-0.464382	6.31596	3.44489	0.0634477	0.674364
	ENSMUSG00000050855	-0.760474	4.28818	3.4447	0.063455	0.674364
	ENSMUSG00000029291	0.658194	4.53995	3.4397	0.0636473	0.674364
	ENSMUSG00000051212	0.826748	3.94454	3.43818	0.0637058	0.674364
	ENSMUSG00000006127	-0.368385	6.70581	3.43784	0.063719	0.674364
	ENSMUSG00000032311	-0.819869	7.70327	3.42493	0.0642191	0.678186
	ENSMUSG00000082536	-0.326329	6.92126	3.40628	0.0649489	0.6833
	ENSMUSG00000028369	-0.694593	9.41234	3.40308	0.0650746	0.6833
	ENSMUSG00000064267	0.824676	3.89579	3.39914	0.0652305	0.6833
	ENSMUSG00000058135	-0.802531	8.41663	3.3956	0.0653704	0.6833
	ENSMUSG00000097275	-0.765974	4.23328	3.3943	0.0654222	0.6833
	ENSMUSG00000028581	0.935667	4.4457	3.38682	0.0657195	0.6833
	ENSMUSG00000001467	0.554381	7.86542	3.38586	0.0657577	0.6833
	ENSMUSG00000026604	-0.412911	8.36693	3.3807	0.0659641	0.6833
	ENSMUSG00000038167	-0.899204	4.55038	3.37976	0.0660016	0.6833
	ENSMUSG00000021428	-0.356141	6.35489	3.37169	0.0663257	0.6833
	ENSMUSG00000059309	0.54737	5.91374	3.36574	0.0665658	0.6833
	ENSMUSG00000040711	0.709205	5.5145	3.35761	0.0668949	0.6833
	ENSMUSG00000040688	0.448444	5.58422	3.35355	0.0670602	0.6833
	ENSMUSG00000036073	0.416123	5.61364	3.35095	0.0671661	0.6833
	ENSMUSG00000003545	-1.99831	4.09213	3.34746	0.0673086	0.6833
	ENSMUSG00000042066	-0.640233	4.31013	3.34744	0.0673094	0.6833
	ENSMUSG00000019437	0.644773	5.71824	3.34607	0.0673655	0.6833
	ENSMUSG00000050335	1.02251	9.3171	3.34392	0.0674537	0.6833
	ENSMUSG00000044600	-0.577227	5.23637	3.34033	0.067601	0.6833
	ENSMUSG00000054469	0.793967	4.00214	3.33879	0.0676642	0.6833
	ENSMUSG00000032076	0.985399	6.30757	3.33651	0.0677582	0.6833
	ENSMUSG00000018293	0.342069	8.27786	3.33495	0.0678226	0.6833
	ENSMUSG00000036144	-0.442309	5.68112	3.33008	0.0680236	0.6833
	ENSMUSG00000038967	-0.502715	6.94858	3.31993	0.0684447	0.6833
	ENSMUSG00000068686	-0.819252	3.74416	3.31979	0.0684505	0.6833
	ENSMUSG00000024668	0.349726	6.29939	3.31918	0.0684758	0.6833
	ENSMUSG00000033739	0.627466	4.18098	3.31888	0.0684886	0.6833
	ENSMUSG00000022234	0.258756	8.46043	3.30893	0.0689041	0.6833
	ENSMUSG00000024800	0.660218	4.14281	3.30415	0.0691052	0.6833
	ENSMUSG00000074677	1.37651	4.84946	3.3039	0.0691156	0.6833
	ENSMUSG00000032766	0.660229	4.09037	3.30232	0.069182	0.6833
	ENSMUSG00000006369	-0.932661	4.76109	3.30178	0.0692048	0.6833
	ENSMUSG00000010358	-0.737741	3.74889	3.29564	0.0694641	0.6833
	ENSMUSG00000087691	0.790546	4.17802	3.29561	0.0694651	0.6833
	ENSMUSG00000031659	0.650819	7.23576	3.29047	0.0696831	0.684065
	ENSMUSG00000039449	0.314629	6.21105	3.28349	0.0699799	0.684266
	ENSMUSG00000032293	-0.57911	5.1062	3.28339	0.069984	0.684266
	ENSMUSG00000021710	0.392453	8.50195	3.2685	0.0706221	0.684478
	ENSMUSG00000049327	0.580187	7.26505	3.26745	0.0706675	0.684478
	ENSMUSG00000030298	0.470353	6.51188	3.26721	0.0706778	0.684478
	ENSMUSG00000048126	0.542666	9.37061	3.2621	0.0708982	0.684478
	ENSMUSG00000073563	0.560689	4.54289	3.25686	0.0711252	0.684478
	ENSMUSG00000051910	-0.614651	5.30995	3.24871	0.0714798	0.684478
	ENSMUSG00000032827	-0.523741	5.57906	3.24765	0.071526	0.684478
	ENSMUSG00000026254	0.377482	6.6984	3.24716	0.0715474	0.684478
	ENSMUSG00000061619	0.469143	5.73186	3.24654	0.0715742	0.684478
	ENSMUSG00000038212	-0.53601	4.66907	3.24377	0.0716954	0.684478
	ENSMUSG00000044405	-0.565807	8.7399	3.24194	0.0717756	0.684478
	ENSMUSG00000034820	-0.873916	3.71913	3.24009	0.0718568	0.684478
	ENSMUSG00000019966	-0.309152	8.79657	3.23785	0.0719549	0.684478
	ENSMUSG00000026377	-0.527515	4.48787	3.23442	0.0721056	0.684478
	ENSMUSG00000059588	0.921252	3.93354	3.23202	0.0722117	0.684478
	ENSMUSG00000032332	0.678757	5.38307	3.22212	0.0726495	0.684478
	ENSMUSG00000000317	0.56289	6.43624	3.214	0.0730106	0.684478
	ENSMUSG00000032412	0.306434	9.41408	3.21251	0.0730772	0.684478
	ENSMUSG00000030421	-0.720751	3.75263	3.21125	0.0731334	0.684478
	ENSMUSG00000092517	1.67632	5.44965	3.20757	0.0732982	0.684478
	ENSMUSG00000003810	0.529444	4.92442	3.2073	0.0733103	0.684478
	ENSMUSG00000046275	-0.553129	9.91489	3.20431	0.0734445	0.684478
	ENSMUSG00000069270	0.776814	5.76444	3.20388	0.0734638	0.684478
	ENSMUSG00000036636	0.311568	7.30203	3.20232	0.073534	0.684478
	ENSMUSG00000044060	-0.68114	4.42107	3.19678	0.0737832	0.684478
	ENSMUSG00000006299	-0.354136	7.3783	3.19649	0.0737966	0.684478
	ENSMUSG00000078945	0.76154	5.54882	3.19276	0.0739649	0.684478
	ENSMUSG00000028312	0.526697	5.95761	3.19045	0.0740696	0.684478
	ENSMUSG00000093812	0.789251	6.58779	3.18473	0.0743294	0.684478
	ENSMUSG00000074802	0.952191	6.40192	3.17967	0.0745597	0.684478
	ENSMUSG00000035790	-0.77968	4.30104	3.1782	0.0746267	0.684478
	ENSMUSG00000029227	-0.554103	4.88901	3.17817	0.0746283	0.684478
	ENSMUSG00000049037	0.543694	6.08696	3.17801	0.0746354	0.684478
	ENSMUSG00000023456	0.559312	10.4519	3.16533	0.0752173	0.688094
	ENSMUSG00000001829	-0.607338	4.0074	3.16328	0.0753117	0.688094
	ENSMUSG00000022940	-0.401718	6.96994	3.15897	0.0755107	0.688622
	ENSMUSG00000026662	0.541824	4.40565	3.15243	0.0758141	0.689166
	ENSMUSG00000026627	0.8299	4.03416	3.14488	0.0761654	0.689166
	ENSMUSG00000024098	-0.582511	6.40087	3.14471	0.0761735	0.689166
	ENSMUSG00000006611	0.662782	8.33056	3.14424	0.0761953	0.689166
	ENSMUSG00000069267	0.98852	6.43585	3.14232	0.0762854	0.689166
	ENSMUSG00000002803	-0.585887	3.89766	3.13859	0.0764597	0.689166
	ENSMUSG00000018770	0.614965	3.92088	3.13648	0.076559	0.689166
	ENSMUSG00000032898	-0.633032	7.7293	3.13043	0.0768433	0.69045
	ENSMUSG00000029823	-0.414285	6.22286	3.1212	0.0772801	0.692452
	ENSMUSG00000025085	-0.31343	10.457	3.11621	0.0775169	0.692452
	ENSMUSG00000039607	-0.392949	8.9473	3.11465	0.077591	0.692452
	ENSMUSG00000087260	0.333095	7.25719	3.11375	0.0776338	0.692452
	ENSMUSG00000074657	-1.05099	4.20774	3.10741	0.0779368	0.693886
	ENSMUSG00000020700	0.54076	4.23121	3.1003	0.078278	0.693964
	ENSMUSG00000032413	-0.380715	8.09638	3.10005	0.0782898	0.693964
	ENSMUSG00000018427	0.402895	6.48597	3.0933	0.0786153	0.693964
	ENSMUSG00000055737	-0.592161	5.64395	3.09138	0.0787078	0.693964
	ENSMUSG00000033350	-0.710057	6.42352	3.09007	0.0787713	0.693964
	ENSMUSG00000073792	0.633187	4.08799	3.0895	0.0787989	0.693964
	ENSMUSG00000041319	0.526032	4.6609	3.08169	0.0791783	0.696048
	ENSMUSG00000029050	-0.373273	6.98553	3.06793	0.0798509	0.699632
	ENSMUSG00000042787	0.515202	5.12602	3.06749	0.0798727	0.699632
	ENSMUSG00000042249	0.490934	6.16483	3.05556	0.080461	0.703073
	ENSMUSG00000026335	0.36776	11.0206	3.05369	0.0805537	0.703073
	ENSMUSG00000023031	0.503497	6.47715	3.04792	0.0808406	0.704317
	ENSMUSG00000011256	0.576175	6.77331	3.04377	0.0810476	0.704375
	ENSMUSG00000028300	-0.410814	9.54538	3.042	0.0811361	0.704375
	ENSMUSG00000022807	-0.47636	5.53405	3.02855	0.0818113	0.705582
	ENSMUSG00000028565	-0.467175	7.45783	3.02543	0.0819687	0.705582
	ENSMUSG00000023885	-1.07146	5.1728	3.02418	0.082032	0.705582
	ENSMUSG00000066571	-0.418506	8.80135	3.01968	0.0822595	0.705582
	ENSMUSG00000018286	0.297175	8.74834	3.01963	0.0822625	0.705582
	ENSMUSG00000049600	0.759841	3.81794	3.01858	0.0823156	0.705582
	ENSMUSG00000030643	0.575829	4.6543	3.01629	0.082432	0.705582
	ENSMUSG00000023960	-0.427504	6.07602	3.01629	0.082432	0.705582
	ENSMUSG00000042293	-0.606002	5.1696	3.00902	0.0828024	0.707511
	ENSMUSG00000073771	-0.538141	5.21687	3.00168	0.0831781	0.707947
	ENSMUSG00000073542	0.482218	5.23495	2.99691	0.0834236	0.707947
	ENSMUSG00000074743	-0.894217	6.01523	2.99407	0.0835701	0.707947
	ENSMUSG00000040312	-0.518103	4.32122	2.99235	0.0836587	0.707947
	ENSMUSG00000054277	0.335191	6.33516	2.99024	0.0837676	0.707947
	ENSMUSG00000021368	0.473102	5.03448	2.98306	0.0841401	0.707947
	ENSMUSG00000039050	0.375045	5.41233	2.98227	0.084181	0.707947
	ENSMUSG00000055435	-0.819585	4.95567	2.97762	0.0844235	0.707947
	ENSMUSG00000045629	-0.497687	5.8412	2.97724	0.084443	0.707947
	ENSMUSG00000031583	-0.475998	5.26437	2.97318	0.0846554	0.707947
	ENSMUSG00000045094	-0.40968	8.15777	2.96558	0.0850538	0.707947
	ENSMUSG00000028328	1.00836	4.29916	2.96256	0.0852129	0.707947
	ENSMUSG00000026393	-0.342954	7.98254	2.95184	0.0857799	0.707947
	ENSMUSG00000018217	0.367065	8.30623	2.95013	0.0858704	0.707947
	ENSMUSG00000062257	-0.80317	3.81855	2.94566	0.0861084	0.707947
	ENSMUSG00000052957	-0.716667	9.18567	2.94414	0.0861896	0.707947
	ENSMUSG00000016495	0.306895	6.99184	2.94006	0.0864077	0.707947
	ENSMUSG00000026185	-0.499519	9.30489	2.93742	0.0865489	0.707947
	ENSMUSG00000060961	-0.710913	7.34188	2.93564	0.0866445	0.707947
	ENSMUSG00000003808	0.466378	5.0496	2.92962	0.0869681	0.707947
	ENSMUSG00000027750	0.768637	10.3624	2.92444	0.0872475	0.707947
	ENSMUSG00000015980	0.37643	5.92703	2.92235	0.0873604	0.707947
	ENSMUSG00000002332	0.498103	4.79469	2.92217	0.0873705	0.707947
	ENSMUSG00000007891	0.603244	12.3272	2.92022	0.087476	0.707947
	ENSMUSG00000049241	-0.551721	7.66162	2.91625	0.0876914	0.707947
	ENSMUSG00000015451	-0.478176	7.27456	2.9118	0.0879338	0.707947
	ENSMUSG00000035376	0.677801	5.30812	2.91116	0.0879685	0.707947
	ENSMUSG00000022012	-0.80944	3.69108	2.90822	0.088129	0.707947
	ENSMUSG00000060950	0.489897	5.32985	2.90214	0.0884621	0.707947
	ENSMUSG00000021361	0.409084	6.05346	2.90131	0.0885076	0.707947
	ENSMUSG00000024302	-0.847133	5.43307	2.89537	0.0888346	0.707947
	ENSMUSG00000014303	-0.617983	4.86981	2.89104	0.0890737	0.707947
	ENSMUSG00000027288	-0.249307	8.38039	2.8904	0.0891088	0.707947
	ENSMUSG00000053935	-0.441276	5.98163	2.88696	0.0892994	0.707947
	ENSMUSG00000033075	-0.329939	6.7703	2.88551	0.0893795	0.707947
	ENSMUSG00000038773	0.454758	5.04613	2.87824	0.0897839	0.707947
	ENSMUSG00000041794	-0.593208	6.10157	2.87504	0.0899629	0.707947
	ENSMUSG00000053886	-0.684601	4.71746	2.87479	0.0899766	0.707947
	ENSMUSG00000019850	-0.676666	4.56278	2.87439	0.0899989	0.707947
	ENSMUSG00000008575	-0.553508	4.80885	2.87282	0.0900871	0.707947
	ENSMUSG00000045624	-0.361325	5.83552	2.87245	0.0901075	0.707947
	ENSMUSG00000050229	-0.306156	6.41732	2.87219	0.0901219	0.707947
	ENSMUSG00000024191	0.340091	6.03595	2.87049	0.0902175	0.707947
	ENSMUSG00000027339	0.589427	7.48093	2.8672	0.0904021	0.707947
	ENSMUSG00000040613	0.854669	7.80994	2.86536	0.0905053	0.707947
	ENSMUSG00000028479	-0.492918	5.20819	2.86155	0.0907198	0.707947
	ENSMUSG00000053985	-0.440747	4.59471	2.86134	0.0907317	0.707947
	ENSMUSG00000030029	0.471062	5.97341	2.8604	0.0907851	0.707947
	ENSMUSG00000047888	-0.52801	5.03068	2.85623	0.0910209	0.707947
	ENSMUSG00000029577	-0.360782	7.23359	2.84988	0.0913805	0.707947
	ENSMUSG00000097903	-0.886104	3.84216	2.84739	0.0915225	0.707947
	ENSMUSG00000016831	-0.737009	4.98176	2.84556	0.0916264	0.707947
	ENSMUSG00000028383	-0.4215	8.19342	2.84034	0.0919246	0.707947
	ENSMUSG00000035314	-0.591209	5.42672	2.8343	0.0922708	0.707947
	ENSMUSG00000021508	0.991243	4.92843	2.83426	0.0922734	0.707947
	ENSMUSG00000029674	0.510762	5.51243	2.8309	0.0924663	0.707947
	ENSMUSG00000041328	-0.305239	7.7904	2.82969	0.0925365	0.707947
	ENSMUSG00000020101	-0.369906	9.47999	2.82752	0.0926615	0.707947
	ENSMUSG00000038119	-0.412664	7.8167	2.82191	0.0929858	0.707947
	ENSMUSG00000039354	0.515268	4.43341	2.8198	0.0931082	0.707947
	ENSMUSG00000052928	-0.4427	5.89645	2.81713	0.0932631	0.707947
	ENSMUSG00000013663	-0.371962	8.05124	2.81354	0.093472	0.707947
	ENSMUSG00000034158	-0.370063	5.38698	2.81308	0.0934986	0.707947
	ENSMUSG00000029718	0.446743	7.87729	2.80934	0.0937166	0.707947
	ENSMUSG00000080316	0.656564	5.25773	2.80492	0.0939753	0.707947
	ENSMUSG00000038495	-0.427793	4.92762	2.80323	0.0940745	0.707947
	ENSMUSG00000017291	-0.24419	8.56646	2.80218	0.0941364	0.707947
	ENSMUSG00000038418	-1.72099	4.61832	2.79647	0.0944719	0.707947
	ENSMUSG00000025743	0.407887	8.09995	2.79513	0.094551	0.707947
	ENSMUSG00000022292	-0.404632	6.95642	2.79374	0.094633	0.707947
	ENSMUSG00000017119	-0.382301	6.1262	2.79153	0.0947636	0.707947
	ENSMUSG00000055116	1.38838	5.19537	2.79069	0.0948132	0.707947
	ENSMUSG00000024271	-0.631388	4.05972	2.79021	0.0948416	0.707947
	ENSMUSG00000017386	0.668368	5.05101	2.78588	0.0950985	0.707947
	ENSMUSG00000038663	-0.419137	7.80471	2.78571	0.0951085	0.707947
	ENSMUSG00000001098	-0.350121	7.12089	2.78568	0.0951103	0.707947
	ENSMUSG00000072825	-0.643228	5.6912	2.78479	0.0951634	0.707947
	ENSMUSG00000014606	0.332887	7.34759	2.78216	0.0953193	0.707947
	ENSMUSG00000027656	1.09616	7.874	2.78179	0.0953415	0.707947
	ENSMUSG00000021763	-0.726589	5.41633	2.78076	0.0954029	0.707947
	ENSMUSG00000054484	0.403085	5.52303	2.77819	0.0955563	0.707947
	ENSMUSG00000030162	1.19756	5.35406	2.77534	0.0957264	0.707947
	ENSMUSG00000066687	-0.545957	5.63924	2.77533	0.0957268	0.707947
	ENSMUSG00000020841	0.244046	7.97358	2.77421	0.0957938	0.707947
	ENSMUSG00000027242	0.446049	5.20737	2.77318	0.0958557	0.707947
	ENSMUSG00000046516	0.606942	4.7528	2.77042	0.0960212	0.707947
	ENSMUSG00000079491	-0.297164	7.45015	2.76789	0.0961728	0.707947
	ENSMUSG00000020733	-0.694462	5.02332	2.76609	0.0962811	0.707947
	ENSMUSG00000054814	-0.621512	4.07555	2.76466	0.0963669	0.707947
	ENSMUSG00000034042	-0.251666	7.76164	2.75955	0.0966753	0.707947
	ENSMUSG00000041482	-0.721533	5.26152	2.75346	0.097044	0.707947
	ENSMUSG00000078942	0.776087	3.65174	2.74941	0.0972901	0.707947
	ENSMUSG00000032826	-0.448923	7.97628	2.74925	0.0973	0.707947
	ENSMUSG00000020455	0.559054	4.38488	2.74893	0.0973198	0.707947
	ENSMUSG00000020085	0.419302	7.32663	2.74853	0.0973439	0.707947
	ENSMUSG00000004530	0.418993	6.74937	2.74739	0.0974135	0.707947
	ENSMUSG00000020897	0.839534	3.69292	2.74724	0.0974225	0.707947
	ENSMUSG00000033781	-0.429107	6.23227	2.74594	0.0975015	0.707947
	ENSMUSG00000022665	-0.467394	9.32571	2.74346	0.0976531	0.707947
	ENSMUSG00000011877	0.515529	4.89718	2.74248	0.097713	0.707947
	ENSMUSG00000058979	0.463149	5.16403	2.74086	0.0978122	0.707947
	ENSMUSG00000029005	0.63293	4.23644	2.73731	0.0980295	0.707947
	ENSMUSG00000019923	-0.321073	7.22793	2.73718	0.0980378	0.707947
	ENSMUSG00000008348	0.371439	9.60706	2.73709	0.0980435	0.707947
	ENSMUSG00000021846	-0.365684	7.73507	2.73409	0.0982272	0.707947
	ENSMUSG00000021987	-0.550625	4.33612	2.73398	0.0982342	0.707947
	ENSMUSG00000032018	0.738872	4.07409	2.72604	0.098724	0.708817
	ENSMUSG00000035891	0.567469	8.14612	2.72413	0.0988422	0.708817
	ENSMUSG00000032899	-0.960208	3.77208	2.72324	0.0988973	0.708817
	ENSMUSG00000064254	0.638645	5.23262	2.7124	0.0995708	0.708817
	ENSMUSG00000052539	-0.411327	5.31219	2.71107	0.099654	0.708817
	ENSMUSG00000091449	-0.633372	3.88574	2.70928	0.0997659	0.708817
	ENSMUSG00000056771	-0.511009	4.73633	2.70851	0.0998144	0.708817
	ENSMUSG00000029920	0.530969	4.8105	2.70785	0.0998557	0.708817
	ENSMUSG00000032641	0.611355	3.94424	2.70733	0.0998883	0.708817
	ENSMUSG00000006818	0.483536	8.57901	2.70694	0.0999124	0.708817
	ENSMUSG00000043923	0.577275	3.84196	2.70609	0.0999655	0.708817
	ENSMUSG00000029413	-0.308069	8.08825	2.7031	0.100153	0.708817
	ENSMUSG00000037239	-0.7212	3.5937	2.70166	0.100244	0.708817
	ENSMUSG00000054091	-0.311947	8.39898	2.698	0.100474	0.70942
	ENSMUSG00000026641	0.343596	6.2168	2.69477	0.100678	0.709642
	ENSMUSG00000032040	0.466333	4.67824	2.69125	0.1009	0.709642
	ENSMUSG00000067288	0.436985	6.41266	2.69059	0.100942	0.709642
	ENSMUSG00000030161	-0.298427	8.26387	2.686	0.101233	0.709778
	ENSMUSG00000066568	-0.3072	6.05158	2.6857	0.101252	0.709778
	ENSMUSG00000025369	-0.27287	9.15107	2.68011	0.101609	0.709829
	ENSMUSG00000004698	0.502131	6.10447	2.67899	0.10168	0.709829
	ENSMUSG00000091971	1.55073	4.49542	2.67255	0.102092	0.709829
	ENSMUSG00000001062	0.491672	4.57082	2.67167	0.102149	0.709829
	ENSMUSG00000026313	-0.479899	4.80862	2.67091	0.102197	0.709829
	ENSMUSG00000027326	0.991215	4.40546	2.66715	0.102439	0.709829
	ENSMUSG00000012819	-0.476348	5.32819	2.66535	0.102555	0.709829
	ENSMUSG00000033557	-0.428754	6.00115	2.66078	0.10285	0.709829
	ENSMUSG00000020077	0.414562	6.71196	2.6587	0.102985	0.709829
	ENSMUSG00000030208	-0.445053	10.3916	2.65842	0.103003	0.709829
	ENSMUSG00000023019	0.835767	10.1012	2.65771	0.103049	0.709829
	ENSMUSG00000022707	0.637023	8.62935	2.65654	0.103125	0.709829
	ENSMUSG00000022309	0.740696	4.84997	2.65614	0.103151	0.709829
	ENSMUSG00000032013	1.02941	4.05889	2.6478	0.103694	0.712005
	ENSMUSG00000031792	0.406868	5.40001	2.64679	0.103759	0.712005
	ENSMUSG00000032497	0.33363	6.64415	2.64017	0.104192	0.713975
	ENSMUSG00000039105	0.333063	7.35064	2.63612	0.104458	0.714792
	ENSMUSG00000026360	1.06409	6.23829	2.62854	0.104958	0.715898
	ENSMUSG00000070427	-0.539095	4.56712	2.6258	0.105139	0.715898
	ENSMUSG00000018697	-0.376446	5.8899	2.62424	0.105243	0.715898
	ENSMUSG00000021549	0.410222	8.36179	2.62218	0.10538	0.715898
	ENSMUSG00000030720	0.578981	4.60236	2.62124	0.105442	0.715898
	ENSMUSG00000028249	0.504441	5.57098	2.61947	0.10556	0.715898
	ENSMUSG00000019889	-0.361186	7.21019	2.61738	0.105699	0.715898
	ENSMUSG00000038648	-0.427557	5.51554	2.61484	0.105868	0.715898
	ENSMUSG00000023348	-0.468236	5.08326	2.61214	0.106049	0.715898
	ENSMUSG00000038608	0.342169	7.92761	2.61053	0.106156	0.715898
	ENSMUSG00000073643	0.341529	6.74412	2.6076	0.106352	0.715898
	ENSMUSG00000044792	-0.323187	7.61367	2.60607	0.106456	0.715898
	ENSMUSG00000081534	0.331288	6.33543	2.60308	0.106656	0.715898
	ENSMUSG00000022231	-0.606915	6.92319	2.59864	0.106955	0.715898
	ENSMUSG00000053040	0.904124	6.28207	2.59617	0.107122	0.715898
	ENSMUSG00000073639	-0.253877	7.04864	2.59586	0.107143	0.715898
	ENSMUSG00000005087	1.1095	5.42394	2.59508	0.107196	0.715898
	ENSMUSG00000085148	0.477427	5.06164	2.58969	0.107561	0.715898
	ENSMUSG00000063870	0.241241	8.87716	2.58938	0.107582	0.715898
	ENSMUSG00000069520	0.26796	7.57688	2.58683	0.107756	0.715898
	ENSMUSG00000014329	-0.446427	6.61753	2.58529	0.10786	0.715898
	ENSMUSG00000031668	-0.334105	6.05639	2.58294	0.108021	0.715898
	ENSMUSG00000030187	1.02145	3.67706	2.5809	0.10816	0.715898
	ENSMUSG00000097090	0.550163	4.25998	2.57885	0.1083	0.715898
	ENSMUSG00000034343	0.350335	6.43279	2.57833	0.108336	0.715898
	ENSMUSG00000005233	0.833901	3.85479	2.57689	0.108435	0.715898
	ENSMUSG00000018428	-0.37615	7.29266	2.57357	0.108662	0.716233
	ENSMUSG00000009394	-0.618169	4.31658	2.57187	0.108779	0.716233
	ENSMUSG00000022371	-0.615576	5.68735	2.56844	0.109015	0.716321
	ENSMUSG00000032643	0.54048	5.02758	2.56689	0.109122	0.716321
	ENSMUSG00000034653	0.343431	5.55238	2.56528	0.109233	0.716321
	ENSMUSG00000039167	-0.280917	7.40613	2.55873	0.109687	0.717241
	ENSMUSG00000073418	-0.448452	11.4071	2.55667	0.10983	0.717241
	ENSMUSG00000046056	-0.643057	4.47943	2.55465	0.10997	0.717241
	ENSMUSG00000030830	0.693806	4.44369	2.54925	0.110346	0.717241
	ENSMUSG00000042410	0.334612	7.24847	2.54852	0.110397	0.717241
	ENSMUSG00000063229	0.524567	9.04322	2.54607	0.110569	0.717241
	ENSMUSG00000032803	0.270458	8.41435	2.54213	0.110845	0.717241
	ENSMUSG00000038187	0.327713	6.78023	2.54156	0.110885	0.717241
	ENSMUSG00000004902	-1.06797	3.64316	2.54146	0.110892	0.717241
	ENSMUSG00000031924	0.58141	7.92666	2.53742	0.111177	0.717241
	ENSMUSG00000092984	-0.961904	10.3842	2.53698	0.111207	0.717241
	ENSMUSG00000038178	0.363349	6.68247	2.5351	0.11134	0.717241
	ENSMUSG00000004044	-0.322569	12.3242	2.53322	0.111473	0.717241
	ENSMUSG00000028207	-0.354499	9.05279	2.52775	0.111859	0.717241
	ENSMUSG00000073436	0.420383	5.40008	2.52729	0.111892	0.717241
	ENSMUSG00000023267	-0.825961	5.31418	2.52702	0.111912	0.717241
	ENSMUSG00000045100	-0.509356	4.82804	2.52689	0.11192	0.717241
	ENSMUSG00000022537	-0.477808	5.39356	2.5255	0.112019	0.717241
	ENSMUSG00000040010	0.58956	5.18414	2.51872	0.112502	0.717931
	ENSMUSG00000002963	0.51482	4.88854	2.51838	0.112526	0.717931
	ENSMUSG00000042675	-0.512323	6.77323	2.51623	0.11268	0.717931
	ENSMUSG00000034673	-0.309737	7.30756	2.5132	0.112897	0.717931
	ENSMUSG00000029059	0.624682	7.28602	2.51264	0.112937	0.717931
	ENSMUSG00000067722	-0.347217	6.2996	2.51161	0.11301	0.717931
	ENSMUSG00000041992	-0.444886	6.1061	2.50559	0.113443	0.719547
	ENSMUSG00000034525	-0.277535	7.69603	2.50301	0.113629	0.719547
	ENSMUSG00000050052	-0.36949	9.15429	2.49727	0.114044	0.719547
	ENSMUSG00000063450	-0.489599	8.71528	2.4961	0.114129	0.719547
	ENSMUSG00000073982	0.392677	6.5305	2.49607	0.114131	0.719547
	ENSMUSG00000027671	0.345084	5.92228	2.49581	0.114149	0.719547
	ENSMUSG00000042099	-0.339476	6.94824	2.49148	0.114464	0.720019
	ENSMUSG00000005371	-0.41021	5.9562	2.48851	0.11468	0.720019
	ENSMUSG00000027102	-0.769338	4.51104	2.48669	0.114813	0.720019
	ENSMUSG00000044548	-0.563673	4.63993	2.48497	0.114939	0.720019
	ENSMUSG00000029534	-0.415315	5.15675	2.48304	0.11508	0.720019
	ENSMUSG00000033991	0.280497	7.16872	2.48198	0.115158	0.720019
	ENSMUSG00000016206	-0.449785	5.75629	2.48061	0.115257	0.720019
	ENSMUSG00000027394	0.326488	6.01578	2.4769	0.11553	0.720799
	ENSMUSG00000045055	-0.553225	3.98109	2.47156	0.115923	0.721177
	ENSMUSG00000032122	0.880899	7.87196	2.47135	0.115939	0.721177
	ENSMUSG00000059939	0.387514	6.02686	2.47005	0.116034	0.721177
	ENSMUSG00000027222	0.567789	8.41454	2.46611	0.116325	0.722069
	ENSMUSG00000023224	-0.353687	8.87302	2.45892	0.116859	0.724223
	ENSMUSG00000028556	-0.354103	5.94619	2.45302	0.117299	0.724223
	ENSMUSG00000053819	-0.267568	8.90583	2.45224	0.117357	0.724223
	ENSMUSG00000039166	0.557795	5.08314	2.45144	0.117417	0.724223
	ENSMUSG00000020264	0.643818	7.94143	2.44253	0.118086	0.724223
	ENSMUSG00000042962	0.751668	3.84642	2.4416	0.118156	0.724223
	ENSMUSG00000030707	0.62245	5.89517	2.44026	0.118256	0.724223
	ENSMUSG00000016756	0.432166	6.75213	2.43952	0.118313	0.724223
	ENSMUSG00000005505	0.695108	3.7406	2.4373	0.11848	0.724223
	ENSMUSG00000038848	-0.325187	6.06691	2.43565	0.118605	0.724223
	ENSMUSG00000021831	0.433272	5.21207	2.43539	0.118625	0.724223
	ENSMUSG00000046694	-0.886414	4.91042	2.43504	0.118651	0.724223
	ENSMUSG00000019960	-0.417549	7.69759	2.43482	0.118667	0.724223
	ENSMUSG00000016024	0.620844	9.69204	2.43372	0.118751	0.724223
	ENSMUSG00000024395	-0.465063	8.16253	2.42746	0.119226	0.725329
	ENSMUSG00000040907	0.961827	5.00571	2.42742	0.119229	0.725329
	ENSMUSG00000032352	-0.804309	3.71358	2.42265	0.119593	0.726634
	ENSMUSG00000097290	-0.491003	5.08177	2.41948	0.119834	0.727197
	ENSMUSG00000046080	0.845754	3.68128	2.41638	0.120072	0.727514
	ENSMUSG00000057396	-0.610065	3.88343	2.41352	0.120292	0.727514
	ENSMUSG00000021639	0.496742	4.26873	2.4086	0.12067	0.727514
	ENSMUSG00000096910	-0.568866	4.5309	2.40728	0.120772	0.727514
	ENSMUSG00000032097	-0.944526	4.0694	2.40608	0.120864	0.727514
	ENSMUSG00000026659	0.458428	5.03805	2.40604	0.120868	0.727514
	ENSMUSG00000029394	0.681857	3.97766	2.40328	0.121081	0.727514
	ENSMUSG00000026623	0.442243	6.91664	2.40262	0.121132	0.727514
	ENSMUSG00000051735	0.604402	5.78906	2.39743	0.121535	0.727514
	ENSMUSG00000036863	-0.716548	3.72559	2.3973	0.121545	0.727514
	ENSMUSG00000044783	0.275664	7.58804	2.39554	0.121682	0.727514
	ENSMUSG00000039529	0.57472	7.00341	2.39198	0.121959	0.727514
	ENSMUSG00000004460	0.376487	7.99207	2.39171	0.12198	0.727514
	ENSMUSG00000074030	-0.671479	4.788	2.39111	0.122027	0.727514
	ENSMUSG00000027998	-0.403305	5.2781	2.38987	0.122123	0.727514
	ENSMUSG00000090145	-0.538879	5.12964	2.38711	0.122339	0.727912
	ENSMUSG00000026028	-0.225465	7.7387	2.38342	0.122629	0.728308
	ENSMUSG00000030846	0.471851	4.94809	2.38035	0.12287	0.728308
	ENSMUSG00000067787	-0.494696	6.34542	2.37818	0.123041	0.728308
	ENSMUSG00000035356	-0.541896	7.42149	2.374	0.123371	0.728308
	ENSMUSG00000075031	0.765685	6.65267	2.3737	0.123394	0.728308
	ENSMUSG00000022265	0.375787	7.50553	2.372	0.123528	0.728308
	ENSMUSG00000009647	-0.346856	5.50397	2.37166	0.123556	0.728308
	ENSMUSG00000045658	-0.57396	5.31342	2.3711	0.1236	0.728308
	ENSMUSG00000025153	1.2815	5.88353	2.36772	0.123868	0.729004
	ENSMUSG00000023723	0.397499	4.99298	2.36448	0.124125	0.729639
	ENSMUSG00000002871	0.332054	5.94253	2.35871	0.124585	0.731462
	ENSMUSG00000024677	0.938575	3.96159	2.34819	0.125429	0.734083
	ENSMUSG00000074884	0.566668	4.29609	2.34544	0.12565	0.734083
	ENSMUSG00000056124	0.382994	6.66115	2.34515	0.125673	0.734083
	ENSMUSG00000010277	-0.241498	8.2194	2.34465	0.125714	0.734083
	ENSMUSG00000051978	0.476631	4.57079	2.3434	0.125815	0.734083
	ENSMUSG00000025076	-0.372903	5.80065	2.34192	0.125934	0.734083
	ENSMUSG00000022391	0.402118	5.54014	2.3375	0.126292	0.734272
	ENSMUSG00000014426	-0.403474	5.79469	2.3369	0.12634	0.734272
	ENSMUSG00000062980	-0.365297	8.22839	2.33594	0.126418	0.734272
	ENSMUSG00000024077	0.54062	4.33611	2.32876	0.127003	0.736791
	ENSMUSG00000040250	0.359266	6.66431	2.32239	0.127524	0.738203
	ENSMUSG00000029397	-0.484913	4.39384	2.3173	0.127942	0.738203
	ENSMUSG00000031928	-0.542673	4.24903	2.31691	0.127974	0.738203
	ENSMUSG00000020097	0.286694	8.35404	2.31488	0.128141	0.738203
	ENSMUSG00000024240	-0.392355	4.91499	2.31423	0.128195	0.738203
	ENSMUSG00000059970	-0.928507	3.82644	2.31364	0.128243	0.738203
	ENSMUSG00000023994	0.430237	5.86642	2.31016	0.12853	0.738203
	ENSMUSG00000043881	-0.610152	3.90378	2.30931	0.128601	0.738203
	ENSMUSG00000032698	0.533697	5.39671	2.30923	0.128608	0.738203
	ENSMUSG00000043279	-0.296631	6.37065	2.30484	0.128971	0.739419
	ENSMUSG00000015947	0.932112	4.35711	2.29747	0.129585	0.742063
	ENSMUSG00000006362	-0.413792	5.27637	2.29536	0.129761	0.742202
	ENSMUSG00000049709	0.973843	3.49299	2.29153	0.130082	0.743164
	ENSMUSG00000032020	0.604402	5.24627	2.28736	0.130432	0.744291
	ENSMUSG00000073374	-0.476238	4.40097	2.28399	0.130716	0.744296
	ENSMUSG00000032570	-0.526705	3.79597	2.28256	0.130836	0.744296
	ENSMUSG00000059273	-0.31411	7.12901	2.27892	0.131143	0.744296
	ENSMUSG00000028524	-0.884592	4.03155	2.27839	0.131188	0.744296
	ENSMUSG00000039512	0.629817	8.74591	2.2762	0.131373	0.744296
	ENSMUSG00000087141	-0.713958	4.73534	2.27574	0.131412	0.744296
	ENSMUSG00000093930	0.42828	11.3725	2.27353	0.1316	0.744296
	ENSMUSG00000036402	0.397753	5.50104	2.27291	0.131653	0.744296
	ENSMUSG00000044258	0.954975	7.50506	2.26597	0.132243	0.744947
	ENSMUSG00000043091	0.459576	6.53524	2.26589	0.13225	0.744947
	ENSMUSG00000066842	0.620343	7.39109	2.26508	0.13232	0.744947
	ENSMUSG00000086513	0.522009	4.39587	2.26137	0.132636	0.744947
	ENSMUSG00000028101	0.530642	4.05254	2.25738	0.132979	0.744947
	ENSMUSG00000037103	0.505094	5.19606	2.25552	0.133139	0.744947
	ENSMUSG00000059810	-0.476297	6.41475	2.25393	0.133275	0.744947
	ENSMUSG00000006403	1.01272	4.4385	2.25274	0.133378	0.744947
	ENSMUSG00000030779	-0.334541	6.07283	2.25022	0.133595	0.744947
	ENSMUSG00000090386	0.496522	5.30257	2.24716	0.13386	0.744947
	ENSMUSG00000007041	0.498644	7.47522	2.2416	0.134342	0.744947
	ENSMUSG00000024414	0.313034	6.76206	2.24158	0.134343	0.744947
	ENSMUSG00000028532	-0.468917	6.30934	2.24098	0.134396	0.744947
	ENSMUSG00000037295	0.314137	6.76659	2.23911	0.134558	0.744947
	ENSMUSG00000042826	-0.563544	4.31983	2.23824	0.134635	0.744947
	ENSMUSG00000041164	0.572531	3.79916	2.23656	0.13478	0.744947
	ENSMUSG00000043259	-0.574242	4.24337	2.23564	0.134861	0.744947
	ENSMUSG00000024219	-0.303886	7.18066	2.23479	0.134935	0.744947
	ENSMUSG00000060509	0.538815	4.41221	2.23341	0.135056	0.744947
	ENSMUSG00000063952	-0.399419	5.6702	2.2312	0.135249	0.744947
	ENSMUSG00000030263	0.517753	6.70455	2.22981	0.13537	0.744947
	ENSMUSG00000021068	0.319372	7.98234	2.22543	0.135755	0.744947
	ENSMUSG00000020105	-0.568676	5.64912	2.22383	0.135896	0.744947
	ENSMUSG00000028059	0.293539	7.44421	2.22291	0.135977	0.744947
	ENSMUSG00000038024	0.359861	7.19109	2.22252	0.136011	0.744947
	ENSMUSG00000071847	-0.537731	7.68207	2.22215	0.136043	0.744947
	ENSMUSG00000056069	0.524681	6.67221	2.21701	0.136497	0.744947
	ENSMUSG00000064302	0.272291	6.69838	2.21692	0.136505	0.744947
	ENSMUSG00000026305	0.315478	7.79921	2.21592	0.136593	0.744947
	ENSMUSG00000001555	0.397886	5.43218	2.21281	0.136869	0.744947
	ENSMUSG00000028692	0.262094	8.02843	2.21219	0.136925	0.744947
	ENSMUSG00000024817	0.346617	6.85362	2.21132	0.137001	0.744947
	ENSMUSG00000043284	0.424557	5.30002	2.21048	0.137076	0.744947
	ENSMUSG00000024743	-0.601238	3.85655	2.21046	0.137078	0.744947
	ENSMUSG00000041762	0.334204	6.29594	2.21008	0.137112	0.744947
	ENSMUSG00000045672	0.513742	4.8267	2.2063	0.137448	0.745172
	ENSMUSG00000046841	0.455966	6.70029	2.20598	0.137476	0.745172
	ENSMUSG00000022800	0.283465	6.81812	2.19891	0.138108	0.745172
	ENSMUSG00000038217	0.57982	5.00553	2.19883	0.138115	0.745172
	ENSMUSG00000044847	0.438948	5.33915	2.19877	0.138121	0.745172
	ENSMUSG00000024404	0.239799	8.08057	2.19529	0.138433	0.745172
	ENSMUSG00000076432	0.259466	8.20434	2.19407	0.138543	0.745172
	ENSMUSG00000028633	-0.514534	4.18099	2.19355	0.138589	0.745172
	ENSMUSG00000032519	0.287528	6.30708	2.19293	0.138645	0.745172
	ENSMUSG00000061740	-0.374636	5.01003	2.19247	0.138687	0.745172
	ENSMUSG00000020592	0.610523	6.27794	2.19084	0.138833	0.745172
	ENSMUSG00000066000	-0.391595	5.6764	2.18591	0.139279	0.745714
	ENSMUSG00000042305	0.283884	6.24031	2.18569	0.139299	0.745714
	ENSMUSG00000021589	0.454172	5.30815	2.18448	0.139408	0.745714
	ENSMUSG00000038546	0.405062	6.84584	2.18296	0.139546	0.745714
	ENSMUSG00000051469	-0.360689	4.92434	2.17806	0.139991	0.747274
	ENSMUSG00000023020	0.2585	7.13521	2.173	0.140452	0.747348
	ENSMUSG00000049539	0.733555	5.94804	2.17209	0.140535	0.747348
	ENSMUSG00000028857	-0.406802	5.03435	2.16931	0.140789	0.747348
	ENSMUSG00000002731	0.300755	6.13574	2.16759	0.140947	0.747348
	ENSMUSG00000041671	0.323866	5.43784	2.16746	0.140959	0.747348
	ENSMUSG00000032126	0.372866	5.76193	2.16502	0.141183	0.747348
	ENSMUSG00000041915	0.426606	4.83428	2.16298	0.14137	0.747348
	ENSMUSG00000028851	-0.272234	6.72547	2.16279	0.141387	0.747348
	ENSMUSG00000029403	-0.398427	5.88328	2.16026	0.141621	0.747348
	ENSMUSG00000035759	-0.432158	5.1506	2.15942	0.141698	0.747348
	ENSMUSG00000021094	0.478745	6.95303	2.15793	0.141836	0.747348
	ENSMUSG00000022386	-0.408433	5.07876	2.15785	0.141843	0.747348
	ENSMUSG00000059975	-0.343589	5.9279	2.15584	0.142029	0.747417
	ENSMUSG00000027187	-0.385192	11.0136	2.1544	0.142162	0.747417
	ENSMUSG00000020929	-0.283254	5.95513	2.14943	0.142623	0.747625
	ENSMUSG00000028848	0.36763	5.8577	2.1459	0.142951	0.747625
	ENSMUSG00000020120	0.832367	5.53108	2.14555	0.142984	0.747625
	ENSMUSG00000044894	0.432519	7.20312	2.14307	0.143215	0.747625
	ENSMUSG00000054079	0.267993	6.96773	2.13499	0.143972	0.747625
	ENSMUSG00000027070	-1.33616	6.89563	2.12853	0.14458	0.747625
	ENSMUSG00000029468	0.453276	7.16316	2.12812	0.144618	0.747625
	ENSMUSG00000037847	0.441757	4.48207	2.12802	0.144627	0.747625
	ENSMUSG00000027351	-0.39062	6.12201	2.12716	0.144709	0.747625
	ENSMUSG00000021840	0.258308	6.96115	2.12712	0.144713	0.747625
	ENSMUSG00000040548	-0.286598	7.98344	2.12553	0.144862	0.747625
	ENSMUSG00000010660	-0.644421	4.50021	2.12369	0.145036	0.747625
	ENSMUSG00000032280	-0.408295	7.79414	2.12127	0.145266	0.747625
	ENSMUSG00000053838	0.276528	6.62021	2.11938	0.145445	0.747625
	ENSMUSG00000018042	0.406685	7.11546	2.11749	0.145625	0.747625
	ENSMUSG00000020532	0.948397	10.2751	2.11337	0.146017	0.747625
	ENSMUSG00000028992	-0.552568	3.69958	2.11292	0.14606	0.747625
	ENSMUSG00000029569	-0.271054	6.28522	2.11274	0.146078	0.747625
	ENSMUSG00000078429	-0.283311	8.6383	2.10909	0.146426	0.747625
	ENSMUSG00000068134	-0.329105	5.6483	2.10891	0.146443	0.747625
	ENSMUSG00000078780	1.20679	4.87536	2.10698	0.146628	0.747625
	ENSMUSG00000045838	-0.473074	8.83423	2.10384	0.146929	0.747625
	ENSMUSG00000030036	-0.565358	3.72774	2.10125	0.147179	0.747625
	ENSMUSG00000063524	0.46159	7.40816	2.10107	0.147196	0.747625
	ENSMUSG00000019975	-0.606447	3.82047	2.09883	0.147412	0.747625
	ENSMUSG00000055884	0.296609	5.73433	2.09855	0.147439	0.747625
	ENSMUSG00000020988	-0.574622	3.69331	2.09686	0.147602	0.747625
	ENSMUSG00000024300	0.714715	7.47147	2.09601	0.147684	0.747625
	ENSMUSG00000031974	0.437919	5.31609	2.09234	0.148039	0.747625
	ENSMUSG00000040356	0.274028	7.30244	2.09199	0.148073	0.747625
	ENSMUSG00000024542	0.243539	7.26843	2.09056	0.148212	0.747625
	ENSMUSG00000042190	-0.46605	7.45835	2.09009	0.148258	0.747625
	ENSMUSG00000073455	0.423463	4.69148	2.08965	0.1483	0.747625
	ENSMUSG00000074656	0.293351	6.76519	2.08717	0.148541	0.747625
	ENSMUSG00000028047	0.687753	5.09537	2.08505	0.148748	0.747625
	ENSMUSG00000001524	0.454605	5.3651	2.08456	0.148795	0.747625
	ENSMUSG00000024750	0.378338	7.89528	2.08446	0.148804	0.747625
	ENSMUSG00000020814	-0.408571	6.09781	2.08274	0.148972	0.747625
	ENSMUSG00000023008	0.384991	5.74184	2.0826	0.148987	0.747625
	ENSMUSG00000025931	-0.514249	4.55808	2.08087	0.149155	0.747625
	ENSMUSG00000034312	-0.397407	7.89461	2.07889	0.149349	0.747625
	ENSMUSG00000033629	0.387657	4.91787	2.07767	0.149468	0.747625
	ENSMUSG00000061207	0.293908	6.37656	2.07647	0.149585	0.747625
	ENSMUSG00000020130	-0.248857	7.43125	2.07559	0.149672	0.747625
	ENSMUSG00000060962	-1.07356	3.90062	2.0749	0.14974	0.747625
	ENSMUSG00000044017	-0.451255	7.91783	2.07443	0.149786	0.747625
	ENSMUSG00000027163	0.294888	6.79319	2.07441	0.149788	0.747625
	ENSMUSG00000078622	0.476866	4.67852	2.07406	0.149823	0.747625
	ENSMUSG00000024580	0.262112	6.88516	2.07193	0.150032	0.747625
	ENSMUSG00000019302	0.385796	7.3848	2.07191	0.150034	0.747625
	ENSMUSG00000020019	-0.585178	4.7927	2.06869	0.150351	0.747625
	ENSMUSG00000029649	0.302268	7.22341	2.06694	0.150524	0.747625
	ENSMUSG00000068329	0.428176	5.10834	2.0657	0.150645	0.747625
	ENSMUSG00000022443	-0.488711	6.3168	2.06527	0.150688	0.747625
	ENSMUSG00000033530	0.473396	6.25033	2.05988	0.151222	0.747625
	ENSMUSG00000034573	-0.622212	3.99831	2.05978	0.151232	0.747625
	ENSMUSG00000043909	-0.316874	6.55	2.05958	0.151252	0.747625
	ENSMUSG00000028108	-0.575483	4.44039	2.05915	0.151295	0.747625
	ENSMUSG00000020523	-0.364519	5.1878	2.05817	0.151392	0.747625
	ENSMUSG00000017737	-0.989744	4.30298	2.05813	0.151396	0.747625
	ENSMUSG00000026548	0.64514	5.51719	2.05586	0.151622	0.747983
	ENSMUSG00000029009	-0.380402	6.28814	2.04987	0.15222	0.748624
	ENSMUSG00000036986	-0.387025	5.69191	2.04902	0.152304	0.748624
	ENSMUSG00000029254	0.99864	4.52212	2.04775	0.152432	0.748624
	ENSMUSG00000036943	0.629577	5.57386	2.04749	0.152457	0.748624
	ENSMUSG00000020282	-0.518396	5.40308	2.04687	0.152519	0.748624
	ENSMUSG00000025314	0.384955	7.85722	2.04442	0.152765	0.749079
	ENSMUSG00000002031	0.404736	5.4438	2.03939	0.153271	0.750364
	ENSMUSG00000032850	-0.725159	3.53227	2.03876	0.153335	0.750364
	ENSMUSG00000026380	-0.759968	4.3483	2.03034	0.154186	0.752092
	ENSMUSG00000067430	-0.33744	5.8766	2.0295	0.154272	0.752092
	ENSMUSG00000040746	-0.267032	7.82187	2.02934	0.154288	0.752092
	ENSMUSG00000029203	-0.227622	7.14217	2.02917	0.154305	0.752092
	ENSMUSG00000008540	-0.329527	10.7097	2.02604	0.154623	0.752892
	ENSMUSG00000026674	0.343328	5.79909	2.02279	0.154954	0.753753
	ENSMUSG00000086825	0.608112	5.34378	2.01892	0.155349	0.754285
	ENSMUSG00000002728	0.309657	6.34877	2.01869	0.155373	0.754285
	ENSMUSG00000021427	0.252512	7.09601	2.01662	0.155585	0.754564
	ENSMUSG00000090399	0.373699	5.43624	2.00314	0.156974	0.757881
	ENSMUSG00000057963	0.537349	4.93159	2.0026	0.157029	0.757881
	ENSMUSG00000070031	0.427012	5.79624	2.00148	0.157146	0.757881
	ENSMUSG00000051669	-0.740833	4.98811	1.99698	0.157613	0.757881
	ENSMUSG00000020876	0.276667	6.21201	1.9968	0.157632	0.757881
	ENSMUSG00000024781	0.627863	10.8479	1.99627	0.157686	0.757881
	ENSMUSG00000042419	0.367787	4.95022	1.99206	0.158125	0.757881
	ENSMUSG00000006262	-0.300951	6.7775	1.991	0.158236	0.757881
	ENSMUSG00000021765	0.64824	4.96627	1.99056	0.158282	0.757881
	ENSMUSG00000043257	0.431413	4.97011	1.99026	0.158314	0.757881
	ENSMUSG00000053398	-0.54665	4.35672	1.9901	0.158331	0.757881
	ENSMUSG00000024357	0.276085	6.37673	1.98953	0.15839	0.757881
	ENSMUSG00000049538	0.771362	4.91949	1.98803	0.158547	0.757881
	ENSMUSG00000042251	0.527284	6.74516	1.98601	0.158759	0.757881
	ENSMUSG00000029108	0.493329	4.91638	1.98566	0.158795	0.757881
	ENSMUSG00000031447	0.314298	11.6385	1.98485	0.15888	0.757881
	ENSMUSG00000002741	0.299152	7.59586	1.98275	0.1591	0.757881
	ENSMUSG00000023921	-0.325771	9.0349	1.98236	0.159142	0.757881
	ENSMUSG00000039879	-0.315228	6.94011	1.97954	0.159439	0.757881
	ENSMUSG00000061175	0.63352	4.46765	1.97931	0.159463	0.757881
	ENSMUSG00000045455	0.514791	5.40785	1.97733	0.159672	0.757881
	ENSMUSG00000030452	0.247554	7.62897	1.97719	0.159686	0.757881
	ENSMUSG00000002870	0.647336	3.97034	1.9755	0.159865	0.757994
	ENSMUSG00000022999	-0.384712	4.90639	1.9722	0.160214	0.758911
	ENSMUSG00000000278	0.437343	6.92759	1.96825	0.160634	0.759643
	ENSMUSG00000047793	0.488548	5.75381	1.96741	0.160723	0.759643
	ENSMUSG00000034620	-0.21177	7.75469	1.96633	0.160837	0.759643
	ENSMUSG00000041936	-0.540019	5.96509	1.96383	0.161104	0.759643
	ENSMUSG00000051864	0.243029	6.77818	1.96343	0.161147	0.759643
	ENSMUSG00000047945	0.935355	5.96167	1.96057	0.161452	0.759868
	ENSMUSG00000004207	0.389791	13.1755	1.95625	0.161915	0.759868
	ENSMUSG00000022255	0.228361	7.12136	1.95598	0.161943	0.759868
	ENSMUSG00000046561	0.50746	4.37971	1.95429	0.162125	0.759868
	ENSMUSG00000019158	-0.322845	7.49961	1.95363	0.162196	0.759868
	ENSMUSG00000022623	-0.617572	4.09767	1.95275	0.162291	0.759868
	ENSMUSG00000015474	-0.343744	5.26165	1.95201	0.16237	0.759868
	ENSMUSG00000052760	0.851601	3.84731	1.95099	0.16248	0.759868
	ENSMUSG00000037824	0.225395	7.56246	1.9481	0.162792	0.759868
	ENSMUSG00000024065	-0.574405	5.99476	1.94767	0.162838	0.759868
	ENSMUSG00000001123	0.364835	5.43598	1.94701	0.16291	0.759868
	ENSMUSG00000037411	-1.00181	9.09301	1.94369	0.163268	0.759868
	ENSMUSG00000062524	0.601724	3.73022	1.94362	0.163276	0.759868
	ENSMUSG00000049323	-0.258459	7.61177	1.94144	0.163512	0.759868
	ENSMUSG00000095687	0.286002	6.89263	1.94009	0.163658	0.759868
	ENSMUSG00000030188	-0.350064	4.97399	1.93685	0.164011	0.759868
	ENSMUSG00000037957	0.318026	5.79505	1.93491	0.164223	0.759868
	ENSMUSG00000037601	0.381882	5.87116	1.93393	0.164329	0.759868
	ENSMUSG00000006941	-0.27357	6.11007	1.93372	0.164352	0.759868
	ENSMUSG00000000168	0.522024	8.02399	1.93359	0.164367	0.759868
	ENSMUSG00000001518	-0.473282	4.36644	1.93126	0.164621	0.759868
	ENSMUSG00000028476	-0.417307	5.87244	1.93125	0.164621	0.759868
	ENSMUSG00000071302	-0.461817	4.04698	1.92749	0.165034	0.759939
	ENSMUSG00000074867	-0.44109	4.52619	1.92688	0.1651	0.759939
	ENSMUSG00000032459	0.401798	6.60548	1.92496	0.16531	0.759939
	ENSMUSG00000038544	0.535771	4.50296	1.92402	0.165414	0.759939
	ENSMUSG00000020877	-0.609888	4.44892	1.92401	0.165416	0.759939
	ENSMUSG00000074918	-0.495193	6.04986	1.91804	0.166073	0.761592
	ENSMUSG00000020409	-0.288086	6.98349	1.91791	0.166088	0.761592
	ENSMUSG00000090150	-0.323055	8.17234	1.91128	0.166821	0.763247
	ENSMUSG00000018076	-0.523104	4.45087	1.91062	0.166894	0.763247
	ENSMUSG00000032410	-0.258268	7.69293	1.91041	0.166918	0.763247
	ENSMUSG00000024312	0.377019	5.36848	1.90251	0.167798	0.765687
	ENSMUSG00000033773	-0.259658	6.05393	1.90242	0.167808	0.765687
	ENSMUSG00000079507	0.432692	4.74182	1.90139	0.167922	0.765687
	ENSMUSG00000030612	-0.39061	4.70959	1.89641	0.168481	0.767517
	ENSMUSG00000032718	-0.541315	4.54471	1.89488	0.168652	0.767581
	ENSMUSG00000092035	0.793345	5.90099	1.89187	0.168992	0.767669
	ENSMUSG00000021051	-0.276078	6.37216	1.89183	0.168996	0.767669
	ENSMUSG00000049791	-0.315079	9.2779	1.89052	0.169144	0.767669
	ENSMUSG00000048249	-0.293488	8.11537	1.88718	0.169521	0.768664
	ENSMUSG00000080917	0.783937	4.62448	1.88577	0.16968	0.768673
	ENSMUSG00000044197	-0.471487	8.56121	1.87806	0.170555	0.769971
	ENSMUSG00000017376	0.329813	5.95669	1.87752	0.170616	0.769971
	ENSMUSG00000028779	0.301403	6.67617	1.87613	0.170774	0.769971
	ENSMUSG00000017176	-0.522959	4.08444	1.8756	0.170835	0.769971
	ENSMUSG00000075701	0.259412	5.85662	1.87437	0.170975	0.769971
	ENSMUSG00000092417	-0.39028	4.59774	1.8724	0.1712	0.769971
	ENSMUSG00000020015	0.288369	7.33828	1.87225	0.171218	0.769971
	ENSMUSG00000034729	0.250903	6.91123	1.87215	0.171229	0.769971
	ENSMUSG00000037259	-0.668476	4.24661	1.86987	0.17149	0.770433
	ENSMUSG00000042203	-0.473824	4.5314	1.86676	0.171847	0.770787
	ENSMUSG00000028899	0.348427	5.54394	1.86503	0.172045	0.770787
	ENSMUSG00000020154	-0.296594	10.6112	1.86421	0.17214	0.770787
	ENSMUSG00000040584	-0.457792	6.20777	1.86256	0.17233	0.770787
	ENSMUSG00000021147	0.269898	7.0357	1.86231	0.172358	0.770787
	ENSMUSG00000022540	-0.947097	3.64937	1.85811	0.172843	0.77223
	ENSMUSG00000056116	-0.281266	10.1464	1.85653	0.173025	0.77223
	ENSMUSG00000031691	0.271953	6.29925	1.85495	0.173209	0.77223
	ENSMUSG00000031979	-0.275507	7.34752	1.85404	0.173314	0.77223
	ENSMUSG00000055485	-0.245502	8.2657	1.84936	0.173857	0.773722
	ENSMUSG00000040596	-0.361119	5.21435	1.84843	0.173966	0.773722
	ENSMUSG00000018474	0.48072	7.61606	1.84601	0.174249	0.774272
	ENSMUSG00000079227	0.538489	8.06883	1.83955	0.175003	0.775639
	ENSMUSG00000022365	-0.303398	6.60084	1.83877	0.175096	0.775639
	ENSMUSG00000063480	0.287846	6.26891	1.83806	0.175179	0.775639
	ENSMUSG00000027746	0.255585	7.84657	1.83754	0.175239	0.775639
	ENSMUSG00000037235	0.283097	6.32105	1.83588	0.175434	0.775639
	ENSMUSG00000020189	0.34302	9.3667	1.83516	0.175519	0.775639
	ENSMUSG00000020044	-0.414868	8.81222	1.83283	0.175794	0.775639
	ENSMUSG00000070867	0.635582	4.37445	1.83113	0.175994	0.775639
	ENSMUSG00000061315	-0.603438	3.78902	1.83077	0.176036	0.775639
	ENSMUSG00000040481	-0.429017	4.97281	1.82874	0.176276	0.775639
	ENSMUSG00000070436	0.474424	11.2569	1.82759	0.176412	0.775639
	ENSMUSG00000044338	0.456057	6.86991	1.82633	0.176562	0.775639
	ENSMUSG00000036427	0.265213	9.68634	1.82581	0.176623	0.775639
	ENSMUSG00000054434	0.432255	6.56773	1.82125	0.177164	0.777316
	ENSMUSG00000022018	-0.382419	10.7279	1.81667	0.17771	0.778174
	ENSMUSG00000030536	0.301647	9.62991	1.81542	0.17786	0.778174
	ENSMUSG00000019899	0.323807	8.79157	1.81453	0.177966	0.778174
	ENSMUSG00000022285	0.257382	7.70821	1.81426	0.177998	0.778174
	ENSMUSG00000090641	-0.447227	4.52985	1.80651	0.178928	0.78154
	ENSMUSG00000021069	0.447601	9.22581	1.80396	0.179235	0.781926
	ENSMUSG00000086688	0.475762	4.38921	1.80234	0.17943	0.781926
	ENSMUSG00000057497	0.356486	6.12758	1.80178	0.179497	0.781926
	ENSMUSG00000017692	0.654462	3.67571	1.79784	0.179974	0.782224
	ENSMUSG00000022558	-0.600535	4.18221	1.79696	0.180081	0.782224
	ENSMUSG00000025911	-0.628264	5.43666	1.79646	0.180141	0.782224
	ENSMUSG00000037098	-0.504501	5.24921	1.79592	0.180207	0.782224
	ENSMUSG00000024921	-0.275822	7.2894	1.79186	0.1807	0.783669
	ENSMUSG00000071856	-0.296932	6.61698	1.7905	0.180866	0.783689
	ENSMUSG00000069769	0.347824	7.80967	1.78874	0.18108	0.783922
	ENSMUSG00000028649	0.254538	7.32551	1.78719	0.181269	0.784043
	ENSMUSG00000069833	-0.471128	9.0079	1.78195	0.18191	0.784894
	ENSMUSG00000025885	-0.929162	5.33759	1.78128	0.181992	0.784894
	ENSMUSG00000027313	-0.439061	5.36689	1.77897	0.182276	0.784894
	ENSMUSG00000060477	-0.31288	6.59872	1.77797	0.182399	0.784894
	ENSMUSG00000018906	-0.250554	6.19682	1.77731	0.18248	0.784894
	ENSMUSG00000037242	-0.260046	10.5039	1.7772	0.182494	0.784894
	ENSMUSG00000021136	-0.330025	8.36879	1.7764	0.182591	0.784894
	ENSMUSG00000034936	-0.736034	5.34939	1.77352	0.182947	0.78517
	ENSMUSG00000026436	-0.280398	6.62078	1.77327	0.182977	0.78517
	ENSMUSG00000032743	-0.521622	3.59988	1.77181	0.183159	0.785233
	ENSMUSG00000063316	0.351449	5.27736	1.76939	0.183457	0.785233
	ENSMUSG00000021322	0.52786	4.55819	1.76925	0.183475	0.785233
	ENSMUSG00000069273	0.434274	5.45858	1.766	0.183878	0.785346
	ENSMUSG00000081833	0.680528	3.89131	1.76598	0.18388	0.785346
	ENSMUSG00000029725	0.412971	4.73405	1.76365	0.18417	0.785346
	ENSMUSG00000046312	0.366981	8.73341	1.76226	0.184343	0.785346
	ENSMUSG00000030788	-0.261977	9.37467	1.76008	0.184614	0.785346
	ENSMUSG00000036528	0.369573	6.05713	1.75917	0.184728	0.785346
	ENSMUSG00000022452	0.303156	8.15814	1.75875	0.18478	0.785346
	ENSMUSG00000031740	0.53032	7.06429	1.75868	0.184789	0.785346
	ENSMUSG00000081189	-0.489993	4.99878	1.75521	0.185223	0.786505
	ENSMUSG00000086679	-0.487999	5.3366	1.7508	0.185776	0.788165
	ENSMUSG00000000530	-0.23183	7.96885	1.74299	0.18676	0.78869
	ENSMUSG00000020009	-0.392087	7.54765	1.74182	0.186909	0.78869
	ENSMUSG00000033576	-0.317616	9.81736	1.74046	0.187081	0.78869
	ENSMUSG00000024043	-0.383115	6.44842	1.73853	0.187326	0.78869
	ENSMUSG00000047603	-0.500265	3.70337	1.73821	0.187365	0.78869
	ENSMUSG00000034473	0.248935	6.7048	1.73663	0.187566	0.78869
	ENSMUSG00000037337	0.611452	5.29763	1.7342	0.187875	0.78869
	ENSMUSG00000027408	0.478272	5.51769	1.73305	0.188022	0.78869
	ENSMUSG00000059474	0.392321	7.10872	1.73128	0.188248	0.78869
	ENSMUSG00000032252	-0.332743	5.19733	1.73098	0.188286	0.78869
	ENSMUSG00000040234	-0.262225	8.27351	1.73093	0.188293	0.78869
	ENSMUSG00000019718	-0.396031	6.16855	1.73056	0.188339	0.78869
	ENSMUSG00000021621	0.24156	6.6004	1.7299	0.188424	0.78869
	ENSMUSG00000021646	-0.390786	6.6908	1.72818	0.188644	0.78869
	ENSMUSG00000022770	-0.353914	5.69163	1.72754	0.188725	0.78869
	ENSMUSG00000051041	-0.258331	8.21797	1.72565	0.188968	0.78869
	ENSMUSG00000073968	-0.387452	5.02446	1.72489	0.189064	0.78869
	ENSMUSG00000005803	-0.278587	8.16767	1.72466	0.189094	0.78869
	ENSMUSG00000026187	-0.438845	5.43911	1.72371	0.189216	0.78869
	ENSMUSG00000032615	0.454814	3.98368	1.71696	0.190084	0.78869
	ENSMUSG00000025969	0.34455	7.13823	1.71578	0.190237	0.78869
	ENSMUSG00000012429	-0.453707	4.57291	1.71429	0.190429	0.78869
	ENSMUSG00000036560	0.506843	4.72404	1.71408	0.190457	0.78869
	ENSMUSG00000051236	-0.523087	4.45958	1.71219	0.190702	0.78869
	ENSMUSG00000036435	0.522521	4.06034	1.71164	0.190773	0.78869
	ENSMUSG00000024672	0.86975	4.6404	1.71097	0.190859	0.78869
	ENSMUSG00000027882	0.400868	4.97039	1.71033	0.190942	0.78869
	ENSMUSG00000028412	0.462165	3.92056	1.71001	0.190983	0.78869
	ENSMUSG00000028790	0.252065	7.20279	1.706	0.191505	0.78869
	ENSMUSG00000038080	-0.407794	5.49102	1.70547	0.191574	0.78869
	ENSMUSG00000026869	0.273463	6.68602	1.7039	0.191778	0.78869
	ENSMUSG00000032492	0.4573	5.4803	1.70229	0.191988	0.78869
	ENSMUSG00000049516	-0.486568	3.81346	1.70149	0.192094	0.78869
	ENSMUSG00000023828	-0.33152	6.61462	1.70098	0.19216	0.78869
	ENSMUSG00000027533	0.466521	7.16903	1.70095	0.192164	0.78869
	ENSMUSG00000002308	0.361886	6.95956	1.70009	0.192276	0.78869
	ENSMUSG00000025784	-0.350186	7.23353	1.69895	0.192425	0.78869
	ENSMUSG00000030577	0.896234	4.68222	1.69447	0.193013	0.78869
	ENSMUSG00000032374	0.463341	7.66504	1.69348	0.193143	0.78869
	ENSMUSG00000032135	-0.314662	8.77701	1.69131	0.193428	0.78869
	ENSMUSG00000034575	-0.426111	4.20134	1.68909	0.193721	0.78869
	ENSMUSG00000055980	-0.378854	5.2444	1.68889	0.193748	0.78869
	ENSMUSG00000037531	-0.370399	4.6176	1.68826	0.19383	0.78869
	ENSMUSG00000033793	0.317055	6.16214	1.68726	0.193963	0.78869
	ENSMUSG00000070372	0.444091	5.01985	1.68626	0.194095	0.78869
	ENSMUSG00000055835	-0.411649	4.42995	1.68603	0.194126	0.78869
	ENSMUSG00000019947	0.327897	6.15109	1.68491	0.194274	0.78869
	ENSMUSG00000031787	0.367429	5.48062	1.68489	0.194276	0.78869
	ENSMUSG00000028007	0.432285	4.74737	1.6833	0.194487	0.78869
	ENSMUSG00000019977	-0.296367	5.58932	1.68229	0.19462	0.78869
	ENSMUSG00000093077	0.830851	7.15926	1.682	0.194659	0.78869
	ENSMUSG00000022556	-0.407015	4.87337	1.68088	0.194807	0.78869
	ENSMUSG00000046230	-0.301683	8.34432	1.68043	0.194868	0.78869
	ENSMUSG00000001794	0.233141	10.0353	1.67842	0.195134	0.78869
	ENSMUSG00000024218	-0.316126	5.04919	1.67636	0.195409	0.78869
	ENSMUSG00000042772	-0.227248	7.50252	1.67271	0.195896	0.78869
	ENSMUSG00000047388	0.211875	6.40195	1.67244	0.195932	0.78869
	ENSMUSG00000038422	0.701018	3.64178	1.67222	0.195961	0.78869
	ENSMUSG00000073684	-0.323838	5.6897	1.67143	0.196067	0.78869
	ENSMUSG00000006463	-0.360789	4.47316	1.66772	0.196564	0.78869
	ENSMUSG00000030423	-0.315984	5.23667	1.66648	0.19673	0.78869
	ENSMUSG00000025358	0.326051	5.22086	1.66571	0.196834	0.78869
	ENSMUSG00000038028	0.339298	6.03578	1.66493	0.19694	0.78869
	ENSMUSG00000002885	-0.258048	9.00472	1.66441	0.197009	0.78869
	ENSMUSG00000041642	0.442857	6.0752	1.66343	0.197141	0.78869
	ENSMUSG00000024513	0.335041	5.68426	1.66168	0.197377	0.78869
	ENSMUSG00000039735	0.507723	6.441	1.65715	0.197988	0.78869
	ENSMUSG00000035799	0.467116	4.25068	1.65633	0.1981	0.78869
	ENSMUSG00000022941	-0.498815	4.16769	1.65517	0.198256	0.78869
	ENSMUSG00000027425	-0.259931	6.22648	1.65515	0.198259	0.78869
	ENSMUSG00000038545	-0.638488	3.67907	1.65446	0.198353	0.78869
	ENSMUSG00000050587	-0.598081	3.77095	1.6526	0.198605	0.78869
	ENSMUSG00000049932	0.654723	3.82597	1.65253	0.198616	0.78869
	ENSMUSG00000021371	0.30514	9.72753	1.6515	0.198755	0.78869
	ENSMUSG00000022969	0.619602	4.39185	1.65117	0.198799	0.78869
	ENSMUSG00000000154	-0.85082	3.69371	1.64619	0.199478	0.78869
	ENSMUSG00000022967	0.339399	5.34149	1.64453	0.199705	0.78869
	ENSMUSG00000038375	0.37122	10.4735	1.64359	0.199833	0.78869
	ENSMUSG00000029913	0.418933	4.34589	1.64173	0.200088	0.78869
	ENSMUSG00000000804	-0.627968	3.69069	1.64103	0.200184	0.78869
	ENSMUSG00000026709	-0.270595	5.67192	1.64097	0.200193	0.78869
	ENSMUSG00000030086	-0.367914	5.06964	1.64036	0.200275	0.78869
	ENSMUSG00000092460	-0.45371	4.15772	1.64004	0.20032	0.78869
	ENSMUSG00000060038	-0.534056	4.14787	1.63889	0.200478	0.78869
	ENSMUSG00000026196	0.6095	3.77667	1.63853	0.200528	0.78869
	ENSMUSG00000031486	0.524343	5.11304	1.63811	0.200585	0.78869
	ENSMUSG00000079588	0.443883	7.038	1.63748	0.200672	0.78869
	ENSMUSG00000036686	0.355916	6.22202	1.63593	0.200885	0.78869
	ENSMUSG00000033943	-0.256409	8.91213	1.63452	0.201079	0.78869
	ENSMUSG00000086784	0.400769	5.93892	1.63339	0.201234	0.78869
	ENSMUSG00000001065	-0.436496	4.82369	1.63326	0.201253	0.78869
	ENSMUSG00000007777	0.29782	6.0655	1.63309	0.201276	0.78869
	ENSMUSG00000045382	0.680373	5.37839	1.63306	0.201281	0.78869
	ENSMUSG00000070348	0.594935	6.72335	1.6326	0.201344	0.78869
	ENSMUSG00000031078	0.202246	8.85645	1.63248	0.20136	0.78869
	ENSMUSG00000038299	-0.23967	5.89721	1.63097	0.201569	0.78869
	ENSMUSG00000070934	-0.496498	4.27916	1.62987	0.201721	0.78869
	ENSMUSG00000071604	0.621286	5.36611	1.62813	0.201961	0.78869
	ENSMUSG00000038521	-0.356868	9.66729	1.62748	0.202053	0.78869
	ENSMUSG00000033364	-0.274314	5.91111	1.62669	0.202162	0.78869
	ENSMUSG00000032673	0.362788	5.27633	1.62519	0.20237	0.78869
	ENSMUSG00000021079	0.377634	5.4006	1.62276	0.202707	0.78869
	ENSMUSG00000041645	-0.302057	6.10964	1.62226	0.202776	0.78869
	ENSMUSG00000015134	-0.446426	6.23845	1.62189	0.202828	0.78869
	ENSMUSG00000019194	0.325253	6.55559	1.62157	0.202873	0.78869
	ENSMUSG00000040462	-0.236325	8.66501	1.61803	0.203367	0.789194
	ENSMUSG00000018920	0.522118	7.11824	1.618	0.203371	0.789194
	ENSMUSG00000087150	0.524264	4.5832	1.61716	0.203488	0.789194
	ENSMUSG00000042406	0.253595	7.34598	1.61254	0.204135	0.790801
	ENSMUSG00000018654	0.373647	5.63707	1.60981	0.204519	0.790801
	ENSMUSG00000027206	-0.362119	5.2768	1.60899	0.204633	0.790801
	ENSMUSG00000033902	-0.321322	7.95786	1.60877	0.204665	0.790801
	ENSMUSG00000037321	0.267151	7.0468	1.60843	0.204712	0.790801
	ENSMUSG00000039196	0.461059	8.82465	1.60422	0.205306	0.791103
	ENSMUSG00000014077	-0.262565	11.6291	1.60413	0.205319	0.791103
	ENSMUSG00000033379	0.260125	8.36058	1.60332	0.205434	0.791103
	ENSMUSG00000000915	-0.428424	4.49741	1.60322	0.205447	0.791103
	ENSMUSG00000033715	0.813256	6.2484	1.60213	0.205601	0.791103
	ENSMUSG00000030168	-0.354512	9.97158	1.59926	0.206008	0.791213
	ENSMUSG00000011254	0.464603	4.1204	1.59847	0.20612	0.791213
	ENSMUSG00000003549	-0.330451	5.45056	1.59845	0.206123	0.791213
	ENSMUSG00000026131	-0.263542	6.4605	1.59637	0.206419	0.791213
	ENSMUSG00000032265	-0.293281	7.41318	1.59396	0.206761	0.791213
	ENSMUSG00000056602	-0.412425	8.52891	1.59343	0.206837	0.791213
	ENSMUSG00000028419	-0.345437	6.52945	1.59339	0.206843	0.791213
	ENSMUSG00000020205	-0.520296	3.90128	1.5928	0.206927	0.791213
	ENSMUSG00000020776	-0.382373	5.23928	1.58952	0.207395	0.79143
	ENSMUSG00000031442	-0.410865	7.90397	1.58797	0.207616	0.79143
	ENSMUSG00000089682	-0.254511	6.32229	1.58767	0.207659	0.79143
	ENSMUSG00000023832	0.448446	4.50082	1.58429	0.208144	0.79143
	ENSMUSG00000034518	-0.242152	6.01815	1.58421	0.208155	0.79143
	ENSMUSG00000020652	0.322049	5.52524	1.58382	0.208212	0.79143
	ENSMUSG00000020777	-0.290571	9.80363	1.5835	0.208257	0.79143
	ENSMUSG00000032409	0.251213	6.28325	1.58037	0.208707	0.79143
	ENSMUSG00000044768	0.329261	5.92255	1.58017	0.208737	0.79143
	ENSMUSG00000092203	0.57163	5.20197	1.57969	0.208805	0.79143
	ENSMUSG00000039599	0.29858	5.03094	1.57962	0.208815	0.79143
	ENSMUSG00000041130	-0.477389	4.44004	1.57882	0.20893	0.79143
	ENSMUSG00000021550	-0.383103	4.54173	1.57295	0.209779	0.793733
	ENSMUSG00000027180	-0.293038	5.819	1.57236	0.209864	0.793733
	ENSMUSG00000052593	0.373954	5.11532	1.56779	0.210529	0.794673
	ENSMUSG00000041939	0.372529	7.33206	1.56663	0.210697	0.794673
	ENSMUSG00000032875	0.457819	6.13008	1.56639	0.210733	0.794673
	ENSMUSG00000034024	0.185671	9.12076	1.56391	0.211093	0.794673
	ENSMUSG00000029482	0.525758	7.67196	1.55901	0.211811	0.794673
	ENSMUSG00000047330	-0.688724	5.21899	1.55744	0.21204	0.794673
	ENSMUSG00000032089	0.44965	8.00982	1.55723	0.212072	0.794673
	ENSMUSG00000085741	0.4839	3.57701	1.55607	0.212242	0.794673
	ENSMUSG00000027737	1.0199	4.33835	1.556	0.212252	0.794673
	ENSMUSG00000006057	0.301869	6.6203	1.55548	0.212328	0.794673
	ENSMUSG00000023170	-0.305946	5.7214	1.55436	0.212494	0.794673
	ENSMUSG00000027843	0.674902	4.35926	1.55373	0.212586	0.794673
	ENSMUSG00000026600	0.561858	6.69772	1.55283	0.212719	0.794673
	ENSMUSG00000038563	-0.372226	4.7061	1.55185	0.212863	0.794673
	ENSMUSG00000033819	0.38263	4.13136	1.55174	0.212879	0.794673
	ENSMUSG00000053965	1.19642	7.54455	1.55174	0.212879	0.794673
	ENSMUSG00000066043	0.374529	5.53346	1.55172	0.212881	0.794673
	ENSMUSG00000029658	0.690659	3.80069	1.54921	0.213252	0.795447
	ENSMUSG00000027198	-0.229145	7.01662	1.54714	0.213558	0.795982
	ENSMUSG00000061544	-0.416922	4.41402	1.5449	0.21389	0.79661
	ENSMUSG00000019505	-0.232173	10.3166	1.54232	0.214273	0.796955
	ENSMUSG00000021003	0.369936	6.49496	1.54207	0.214309	0.796955
	ENSMUSG00000074604	0.503261	5.24723	1.53916	0.214743	0.797477
	ENSMUSG00000038400	-0.563273	8.709	1.53697	0.215069	0.797477
	ENSMUSG00000092341	0.263906	13.445	1.5356	0.215274	0.797477
	ENSMUSG00000061482	0.271161	9.02219	1.53054	0.216032	0.797477
	ENSMUSG00000000489	0.473133	4.96221	1.53047	0.216042	0.797477
	ENSMUSG00000060981	-0.448953	5.40433	1.5302	0.216083	0.797477
	ENSMUSG00000030148	0.611804	7.23898	1.52968	0.216161	0.797477
	ENSMUSG00000059586	-0.303729	5.74484	1.5295	0.216188	0.797477
	ENSMUSG00000029175	0.546356	4.54148	1.52936	0.216209	0.797477
	ENSMUSG00000024299	0.278195	6.21052	1.52731	0.216517	0.797477
	ENSMUSG00000047497	0.474355	4.42718	1.52675	0.2166	0.797477
	ENSMUSG00000092837	0.326409	14.2987	1.52611	0.216697	0.797477
	ENSMUSG00000053929	-0.23833	6.51775	1.52353	0.217086	0.797477
	ENSMUSG00000036737	-0.182962	8.42826	1.52308	0.217153	0.797477
	ENSMUSG00000085037	-0.492977	4.09526	1.52068	0.217517	0.797477
	ENSMUSG00000031458	-0.338817	5.02341	1.51883	0.217797	0.797477
	ENSMUSG00000022427	0.267337	6.18692	1.51845	0.217855	0.797477
	ENSMUSG00000035305	-0.622023	4.97138	1.51765	0.217976	0.797477
	ENSMUSG00000062729	0.294022	5.60041	1.51697	0.218078	0.797477
	ENSMUSG00000070780	0.407548	7.0467	1.51551	0.2183	0.797477
	ENSMUSG00000030811	0.523509	3.82017	1.51493	0.218388	0.797477
	ENSMUSG00000057637	-0.217067	6.96092	1.51205	0.218827	0.797477
	ENSMUSG00000073565	0.503758	3.91801	1.50959	0.219202	0.797477
	ENSMUSG00000078190	0.876724	4.18325	1.50834	0.219392	0.797477
	ENSMUSG00000059878	0.480461	4.27435	1.50708	0.219585	0.797477
	ENSMUSG00000097352	0.556776	4.45977	1.50702	0.219595	0.797477
	ENSMUSG00000024014	0.641476	4.25805	1.50638	0.219692	0.797477
	ENSMUSG00000056418	-0.720729	3.80333	1.50631	0.219703	0.797477
	ENSMUSG00000006014	-0.802599	4.88239	1.50588	0.219769	0.797477
	ENSMUSG00000024068	0.184722	7.33859	1.50412	0.220039	0.797477
	ENSMUSG00000062381	-0.234394	7.35845	1.50166	0.220417	0.797477
	ENSMUSG00000003955	0.386911	4.95564	1.50152	0.220438	0.797477
	ENSMUSG00000068335	0.395328	5.99909	1.50063	0.220575	0.797477
	ENSMUSG00000024862	0.460973	4.37862	1.49933	0.220774	0.797477
	ENSMUSG00000040648	-0.211183	7.63441	1.49874	0.220865	0.797477
	ENSMUSG00000096975	-0.459905	3.58789	1.49704	0.221128	0.797477
	ENSMUSG00000025352	0.463876	4.70211	1.49646	0.221217	0.797477
	ENSMUSG00000020740	0.272648	5.59524	1.49604	0.221282	0.797477
	ENSMUSG00000021709	-0.291551	7.38551	1.49506	0.221433	0.797477
	ENSMUSG00000021028	-0.364999	4.79221	1.49347	0.221679	0.797477
	ENSMUSG00000049881	0.260815	6.16521	1.49338	0.221693	0.797477
	ENSMUSG00000060679	0.402573	5.10891	1.49316	0.221727	0.797477
	ENSMUSG00000025366	-0.303036	10.7365	1.49298	0.221755	0.797477
	ENSMUSG00000027677	-0.242962	7.06832	1.49187	0.221927	0.797477
	ENSMUSG00000021192	0.185648	7.52139	1.49184	0.221931	0.797477
	ENSMUSG00000031613	0.688049	5.99926	1.4915	0.221984	0.797477
	ENSMUSG00000066245	0.284685	7.5453	1.4888	0.222403	0.797477
	ENSMUSG00000043019	0.168731	8.73774	1.48567	0.22289	0.797477
	ENSMUSG00000034422	-0.230092	7.90925	1.48351	0.223227	0.797477
	ENSMUSG00000030123	0.330367	7.70141	1.48196	0.223467	0.797477
	ENSMUSG00000061028	0.514069	3.55724	1.48078	0.223652	0.797477
	ENSMUSG00000049755	0.579271	3.52805	1.48037	0.223716	0.797477
	ENSMUSG00000040550	0.221826	7.69491	1.48007	0.223764	0.797477
	ENSMUSG00000020850	-0.309292	6.05781	1.47975	0.223814	0.797477
	ENSMUSG00000021072	0.294656	6.18282	1.47697	0.22425	0.797477
	ENSMUSG00000073838	0.50164	4.14844	1.47614	0.224379	0.797477
	ENSMUSG00000024190	-0.62249	5.0123	1.47608	0.224389	0.797477
	ENSMUSG00000027803	-0.268802	8.66798	1.47603	0.224396	0.797477
	ENSMUSG00000030660	0.375618	5.39082	1.47463	0.224617	0.797477
	ENSMUSG00000024515	-0.436196	4.34196	1.47267	0.224925	0.797477
	ENSMUSG00000038383	0.296258	5.66854	1.47067	0.22524	0.797477
	ENSMUSG00000010608	-0.323604	6.01232	1.4706	0.225251	0.797477
	ENSMUSG00000029385	0.287711	6.40909	1.4698	0.225377	0.797477
	ENSMUSG00000021474	-0.444131	5.08944	1.46911	0.225486	0.797477
	ENSMUSG00000010290	0.371037	5.26095	1.46833	0.225609	0.797477
	ENSMUSG00000028896	0.347834	5.28633	1.46818	0.225633	0.797477
	ENSMUSG00000005057	0.595939	5.66731	1.46774	0.225702	0.797477
	ENSMUSG00000028125	-0.553709	4.57654	1.46768	0.225712	0.797477
	ENSMUSG00000030127	0.277752	6.73424	1.46758	0.225728	0.797477
	ENSMUSG00000055239	0.352226	5.24037	1.46186	0.226635	0.799325
	ENSMUSG00000069874	-0.440249	4.41547	1.46081	0.226801	0.799325
	ENSMUSG00000040859	-0.196351	8.08816	1.45981	0.22696	0.799325
	ENSMUSG00000053581	0.242251	8.61389	1.45926	0.227047	0.799325
	ENSMUSG00000006519	0.533134	8.46081	1.45912	0.22707	0.799325
	ENSMUSG00000061410	-0.276176	7.99844	1.45629	0.227522	0.799842
	ENSMUSG00000027792	0.36002	7.02291	1.45614	0.227545	0.799842
	ENSMUSG00000026289	0.226617	6.08453	1.45304	0.228041	0.801008
	ENSMUSG00000043051	0.452673	3.9645	1.44463	0.229392	0.804817
	ENSMUSG00000020865	-0.336298	7.00129	1.44424	0.229455	0.804817
	ENSMUSG00000028413	0.315228	4.95578	1.43732	0.230574	0.808161
	ENSMUSG00000003134	0.443815	4.69652	1.4349	0.230966	0.80826
	ENSMUSG00000004952	0.324874	6.18072	1.43312	0.231256	0.80826
	ENSMUSG00000054619	-0.384464	9.7123	1.43166	0.231494	0.80826
	ENSMUSG00000007029	0.289207	6.44634	1.43155	0.231512	0.80826
	ENSMUSG00000020658	0.495021	5.10927	1.43109	0.231587	0.80826
	ENSMUSG00000030353	-0.561528	3.98303	1.42982	0.231794	0.80826
	ENSMUSG00000032911	0.723333	3.83953	1.42919	0.231897	0.80826
	ENSMUSG00000060216	0.297875	7.49189	1.429	0.231928	0.80826
	ENSMUSG00000024691	-0.541245	4.48276	1.42494	0.232592	0.809722
	ENSMUSG00000022742	-0.238255	6.35714	1.4232	0.232877	0.809722
	ENSMUSG00000031712	-0.361772	5.14767	1.42168	0.233128	0.809722
	ENSMUSG00000018405	0.268771	5.80566	1.42119	0.233207	0.809722
	ENSMUSG00000020087	0.401146	6.58474	1.42107	0.233227	0.809722
	ENSMUSG00000025453	-0.272321	7.50045	1.42037	0.233343	0.809722
	ENSMUSG00000032231	0.380716	5.74507	1.41845	0.233659	0.810242
	ENSMUSG00000056220	-0.679808	6.30291	1.41424	0.234353	0.812072
	ENSMUSG00000004947	-0.286043	7.51201	1.4116	0.234791	0.813012
	ENSMUSG00000040918	-0.384646	4.64052	1.40985	0.235081	0.813342
	ENSMUSG00000055254	-0.455368	5.1871	1.40898	0.235227	0.813342
	ENSMUSG00000022757	0.22947	8.02934	1.40787	0.23541	0.813342
	ENSMUSG00000046814	0.817844	3.70566	1.40701	0.235553	0.813342
	ENSMUSG00000079462	-0.47966	4.52436	1.40586	0.235745	0.813428
	ENSMUSG00000073940	-0.946991	7.48872	1.40387	0.236077	0.813999
	ENSMUSG00000029066	0.314173	8.1124	1.40181	0.23642	0.814607
	ENSMUSG00000026437	0.799693	4.29991	1.40081	0.236589	0.814612
	ENSMUSG00000002222	-0.275709	5.67304	1.39824	0.237019	0.814777
	ENSMUSG00000020604	-0.574006	4.11515	1.3973	0.237176	0.814777
	ENSMUSG00000060739	0.341325	5.7257	1.39674	0.23727	0.814777
	ENSMUSG00000006390	0.278358	5.86402	1.39539	0.237497	0.814777
	ENSMUSG00000047534	0.754593	3.7905	1.39494	0.237572	0.814777
	ENSMUSG00000015126	-0.26334	6.20737	1.39455	0.237639	0.814777
	ENSMUSG00000040345	0.577784	5.42601	1.3933	0.237849	0.814925
	ENSMUSG00000015143	0.364299	7.83269	1.39059	0.238305	0.815698
	ENSMUSG00000061086	-0.437168	4.63225	1.38744	0.238838	0.815698
	ENSMUSG00000020520	0.326095	5.93922	1.38688	0.238932	0.815698
	ENSMUSG00000027751	-0.386754	4.64774	1.38597	0.239087	0.815698
	ENSMUSG00000037894	0.556223	3.87034	1.38563	0.239144	0.815698
	ENSMUSG00000021423	0.585503	5.09589	1.38468	0.239306	0.815698
	ENSMUSG00000037029	0.199327	7.97835	1.3844	0.239354	0.815698
	ENSMUSG00000041958	0.282037	6.40531	1.38221	0.239724	0.815698
	ENSMUSG00000059713	0.409074	4.36813	1.38169	0.239813	0.815698
	ENSMUSG00000015932	-0.402497	6.01215	1.38127	0.239885	0.815698
	ENSMUSG00000038930	-0.37343	5.79299	1.3811	0.239914	0.815698
	ENSMUSG00000022803	-0.558642	3.59419	1.37831	0.240389	0.816102
	ENSMUSG00000051234	0.216537	7.59914	1.37772	0.240491	0.816102
	ENSMUSG00000019188	0.209141	6.14861	1.37746	0.240534	0.816102
	ENSMUSG00000027508	-0.362561	4.34519	1.37493	0.240967	0.816254
	ENSMUSG00000027306	0.550004	5.26803	1.37423	0.241086	0.816254
	ENSMUSG00000032396	-0.245867	6.30962	1.37413	0.241103	0.816254
	ENSMUSG00000047676	-0.425601	4.31675	1.37329	0.241248	0.816254
	ENSMUSG00000022962	0.311023	5.34147	1.36901	0.241982	0.817994
	ENSMUSG00000027552	0.362285	4.67456	1.36834	0.242098	0.817994
	ENSMUSG00000037370	0.57956	4.74847	1.36529	0.242623	0.818246
	ENSMUSG00000040322	0.235513	7.95798	1.36512	0.242652	0.818246
	ENSMUSG00000069835	-0.423415	4.70115	1.36499	0.242675	0.818246
	ENSMUSG00000068917	0.311922	5.35856	1.3624	0.243121	0.819107
	ENSMUSG00000045005	0.397913	5.67343	1.36156	0.243267	0.819107
	ENSMUSG00000074305	0.421377	4.26167	1.36029	0.243487	0.819283
	ENSMUSG00000026248	0.265453	6.21955	1.35692	0.244072	0.819702
	ENSMUSG00000032120	0.479748	4.58206	1.35432	0.244525	0.819702
	ENSMUSG00000022124	-0.167755	8.0874	1.35417	0.244551	0.819702
	ENSMUSG00000066113	-0.718831	4.21306	1.35304	0.244748	0.819702
	ENSMUSG00000038127	0.184237	9.92815	1.35166	0.244987	0.819702
	ENSMUSG00000027293	0.286461	6.89358	1.35049	0.245193	0.819702
	ENSMUSG00000062232	-0.317304	5.73895	1.34949	0.245367	0.819702
	ENSMUSG00000091586	-0.342319	5.84062	1.34725	0.245759	0.819702
	ENSMUSG00000037940	0.258368	7.50826	1.34696	0.24581	0.819702
	ENSMUSG00000021814	0.242046	6.40227	1.34605	0.24597	0.819702
	ENSMUSG00000004473	-0.529858	4.15992	1.34524	0.246112	0.819702
	ENSMUSG00000060678	0.314056	7.68416	1.34474	0.246199	0.819702
	ENSMUSG00000007827	-0.419048	5.37193	1.34412	0.246308	0.819702
	ENSMUSG00000063430	-0.369586	6.03367	1.344	0.246331	0.819702
	ENSMUSG00000030341	-0.241971	7.08836	1.3416	0.246752	0.819702
	ENSMUSG00000020671	0.225003	7.10633	1.34037	0.246969	0.819702
	ENSMUSG00000035152	-0.167873	8.09907	1.33974	0.24708	0.819702
	ENSMUSG00000028792	0.311655	10.282	1.33842	0.247312	0.819702
	ENSMUSG00000025374	0.317352	6.31378	1.33807	0.247374	0.819702
	ENSMUSG00000047832	0.307832	5.72025	1.33801	0.247385	0.819702
	ENSMUSG00000040848	-0.154481	8.80202	1.33495	0.247926	0.819702
	ENSMUSG00000061130	-0.295983	4.94331	1.33397	0.2481	0.819702
	ENSMUSG00000040723	-0.29375	5.75681	1.33023	0.248764	0.819702
	ENSMUSG00000007880	0.306354	5.40317	1.3298	0.24884	0.819702
	ENSMUSG00000030056	-0.263309	5.1839	1.32813	0.249139	0.819702
	ENSMUSG00000032307	-0.234072	6.66788	1.32809	0.249145	0.819702
	ENSMUSG00000030055	0.318147	5.83182	1.32662	0.249407	0.819702
	ENSMUSG00000021097	-0.562976	7.01031	1.32316	0.250026	0.819702
	ENSMUSG00000038888	0.445172	4.42995	1.32225	0.250188	0.819702
	ENSMUSG00000029833	-0.337331	4.75267	1.32184	0.250263	0.819702
	ENSMUSG00000020549	0.33223	5.06197	1.31758	0.251027	0.819702
	ENSMUSG00000053333	0.373989	4.37926	1.31691	0.251148	0.819702
	ENSMUSG00000039568	-0.358894	4.64829	1.31457	0.251568	0.819702
	ENSMUSG00000006281	0.434963	3.9462	1.31408	0.251657	0.819702
	ENSMUSG00000079109	-0.349198	4.76878	1.31252	0.25194	0.819702
	ENSMUSG00000051483	-0.283905	6.43776	1.3113	0.252159	0.819702
	ENSMUSG00000036138	0.232167	8.45096	1.31042	0.252318	0.819702
	ENSMUSG00000039789	-0.330619	4.62841	1.30881	0.25261	0.819702
	ENSMUSG00000025404	0.289791	5.95334	1.30801	0.252756	0.819702
	ENSMUSG00000000340	-0.430923	6.4393	1.30792	0.252771	0.819702
	ENSMUSG00000001751	0.34087	5.29055	1.3074	0.252866	0.819702
	ENSMUSG00000021326	0.250013	6.02457	1.30707	0.252926	0.819702
	ENSMUSG00000078584	-0.307886	5.05433	1.30674	0.252986	0.819702
	ENSMUSG00000062554	0.250601	5.62246	1.30632	0.253062	0.819702
	ENSMUSG00000033373	0.348276	4.47958	1.30606	0.25311	0.819702
	ENSMUSG00000047710	-0.209551	6.44223	1.30536	0.253236	0.819702
	ENSMUSG00000022364	-0.322567	5.42684	1.30474	0.25335	0.819702
	ENSMUSG00000029228	-0.63123	4.7688	1.30433	0.253424	0.819702
	ENSMUSG00000025086	0.270356	5.98577	1.30197	0.253854	0.819702
	ENSMUSG00000074890	0.342348	4.65705	1.30092	0.254045	0.819702
	ENSMUSG00000028309	-0.168193	8.38324	1.30027	0.254164	0.819702
	ENSMUSG00000021614	0.674143	3.9306	1.30013	0.254189	0.819702
	ENSMUSG00000039108	0.27805	6.09623	1.29965	0.254277	0.819702
	ENSMUSG00000024601	-0.243073	8.58863	1.29956	0.254293	0.819702
	ENSMUSG00000024816	0.356331	5.68617	1.2971	0.254743	0.819702
	ENSMUSG00000048578	-0.201645	8.95324	1.29646	0.25486	0.819702
	ENSMUSG00000047747	-0.195212	8.2644	1.29583	0.254976	0.819702
	ENSMUSG00000024247	-0.456051	3.93964	1.29577	0.254988	0.819702
	ENSMUSG00000058392	0.324681	4.30552	1.29549	0.255039	0.819702
	ENSMUSG00000053158	0.416885	5.3964	1.29545	0.255046	0.819702
	ENSMUSG00000035279	0.429845	5.02171	1.29525	0.255082	0.819702
	ENSMUSG00000026535	0.418479	8.56144	1.29463	0.255197	0.819702
	ENSMUSG00000034681	-0.326703	4.76148	1.29388	0.255333	0.819702
	ENSMUSG00000030516	-0.277714	6.67123	1.29383	0.255343	0.819702
	ENSMUSG00000052146	-0.188222	9.99835	1.29359	0.255387	0.819702
	ENSMUSG00000026357	0.675033	4.66539	1.29186	0.255705	0.819702
	ENSMUSG00000029591	-0.363532	4.96176	1.29181	0.255714	0.819702
	ENSMUSG00000019971	-0.335412	6.37974	1.29145	0.25578	0.819702
	ENSMUSG00000023809	0.30181	4.86494	1.29093	0.255876	0.819702
	ENSMUSG00000031703	-0.232959	6.51079	1.29088	0.255886	0.819702
	ENSMUSG00000074649	0.269739	6.86439	1.28963	0.256116	0.819702
	ENSMUSG00000027642	0.181845	9.15784	1.28905	0.256224	0.819702
	ENSMUSG00000060636	0.217715	9.119	1.28879	0.25627	0.819702
	ENSMUSG00000030166	0.413888	4.24138	1.28857	0.256312	0.819702
	ENSMUSG00000053964	0.683025	3.74802	1.28831	0.25636	0.819702
	ENSMUSG00000042389	-0.357185	4.28163	1.2882	0.25638	0.819702
	ENSMUSG00000020810	-0.314171	7.27825	1.28514	0.256945	0.82097
	ENSMUSG00000061079	0.349468	5.0313	1.28131	0.257655	0.822604
	ENSMUSG00000043833	-0.493422	3.54218	1.28057	0.257793	0.822604
	ENSMUSG00000050965	-0.391959	5.06754	1.27923	0.258042	0.822622
	ENSMUSG00000033767	0.290703	5.21129	1.27785	0.258299	0.822622
	ENSMUSG00000064225	0.477008	9.07004	1.27782	0.258305	0.822622
	ENSMUSG00000067847	0.449221	4.18687	1.27502	0.258826	0.823745
	ENSMUSG00000020898	0.256473	6.56118	1.27403	0.259012	0.823799
	ENSMUSG00000032078	-0.394448	3.89455	1.27284	0.259234	0.823967
	ENSMUSG00000021572	0.384687	4.18705	1.27101	0.259576	0.824519
	ENSMUSG00000032301	0.217588	7.89325	1.26696	0.260337	0.825123
	ENSMUSG00000032359	0.329183	8.15733	1.26668	0.26039	0.825123
	ENSMUSG00000040033	0.213106	6.70437	1.26638	0.260448	0.825123
	ENSMUSG00000005198	-0.292257	6.83254	1.26628	0.260466	0.825123
	ENSMUSG00000039159	-0.223098	7.82138	1.26421	0.260855	0.825123
	ENSMUSG00000022901	0.427707	4.70386	1.26415	0.260867	0.825123
	ENSMUSG00000044646	-0.394905	5.69713	1.26284	0.261115	0.825123
	ENSMUSG00000027176	-0.316009	5.27114	1.26281	0.26112	0.825123
	ENSMUSG00000036295	-0.538541	3.6097	1.25877	0.261885	0.826572
	ENSMUSG00000034926	0.457953	6.27783	1.2586	0.261917	0.826572
	ENSMUSG00000022749	0.179436	7.84189	1.25409	0.262772	0.828735
	ENSMUSG00000020063	-0.274876	5.26149	1.24804	0.263928	0.829317
	ENSMUSG00000036067	0.612399	4.66234	1.24729	0.26407	0.829317
	ENSMUSG00000020521	-0.317538	5.7757	1.2462	0.264279	0.829317
	ENSMUSG00000051285	0.423863	4.33674	1.2461	0.264298	0.829317
	ENSMUSG00000024713	-0.284791	6.07828	1.24525	0.264461	0.829317
	ENSMUSG00000040152	-0.710427	11.6766	1.24522	0.264467	0.829317
	ENSMUSG00000018931	0.326155	5.58546	1.24488	0.264532	0.829317
	ENSMUSG00000039953	-0.242872	6.97245	1.24401	0.264699	0.829317
	ENSMUSG00000001334	0.487966	5.34207	1.24388	0.264725	0.829317
	ENSMUSG00000031841	-0.314079	4.40954	1.24362	0.264775	0.829317
	ENSMUSG00000028760	0.247408	5.70143	1.24213	0.265061	0.829317
	ENSMUSG00000030315	0.279366	6.17701	1.24143	0.265196	0.829317
	ENSMUSG00000054150	-0.276781	7.10585	1.24012	0.265448	0.829317
	ENSMUSG00000053279	-0.387392	9.33177	1.2395	0.265568	0.829317
	ENSMUSG00000030279	0.263873	5.99982	1.23867	0.265728	0.829317
	ENSMUSG00000041870	0.298599	6.56825	1.23856	0.265748	0.829317
	ENSMUSG00000017405	0.349883	4.22214	1.23763	0.265929	0.829317
	ENSMUSG00000033253	0.254265	5.11909	1.23708	0.266035	0.829317
	ENSMUSG00000020473	-0.39985	8.17717	1.23559	0.266322	0.829317
	ENSMUSG00000022546	0.375732	6.18599	1.23542	0.266356	0.829317
	ENSMUSG00000028458	0.285081	5.99545	1.23282	0.266859	0.82959
	ENSMUSG00000033863	-0.261551	8.79804	1.23195	0.267028	0.82959
	ENSMUSG00000059552	0.300943	5.13062	1.2312	0.267175	0.82959
	ENSMUSG00000027506	0.506937	6.46067	1.23071	0.267269	0.82959
	ENSMUSG00000037852	0.853642	6.18079	1.22946	0.267512	0.82959
	ENSMUSG00000021514	0.379051	4.71685	1.2291	0.267581	0.82959
	ENSMUSG00000020869	0.300907	9.8732	1.22753	0.267887	0.82959
	ENSMUSG00000026705	0.211692	6.15291	1.22726	0.26794	0.82959
	ENSMUSG00000009687	0.334024	7.82874	1.22709	0.267974	0.82959
	ENSMUSG00000025078	-0.394396	3.98354	1.22536	0.268311	0.830106
	ENSMUSG00000031090	0.246336	5.72884	1.22208	0.268953	0.830211
	ENSMUSG00000039943	-0.667398	4.43525	1.21985	0.26939	0.830211
	ENSMUSG00000023992	0.667003	8.05542	1.21932	0.269495	0.830211
	ENSMUSG00000048537	-0.446313	6.58447	1.21815	0.269725	0.830211
	ENSMUSG00000020894	-0.341249	5.051	1.21797	0.269759	0.830211
	ENSMUSG00000026536	0.374807	6.72481	1.21683	0.269983	0.830211
	ENSMUSG00000060467	0.436817	4.50877	1.21534	0.270277	0.830211
	ENSMUSG00000035878	-0.343616	5.43214	1.21528	0.270288	0.830211
	ENSMUSG00000081723	0.55213	5.59546	1.21481	0.270382	0.830211
	ENSMUSG00000097908	-0.494243	3.67825	1.21457	0.270428	0.830211
	ENSMUSG00000031788	-0.309825	6.99285	1.21426	0.27049	0.830211
	ENSMUSG00000023025	0.251522	6.47522	1.21272	0.270795	0.830211
	ENSMUSG00000026896	-0.223865	7.4762	1.21179	0.270977	0.830211
	ENSMUSG00000014444	-0.245788	9.75803	1.21162	0.271012	0.830211
	ENSMUSG00000006589	0.476633	6.07638	1.21087	0.271159	0.830211
	ENSMUSG00000036775	-0.201676	7.63432	1.20951	0.271429	0.830211
	ENSMUSG00000019539	-0.380268	6.05237	1.20945	0.27144	0.830211
	ENSMUSG00000034032	-0.244775	6.58074	1.20884	0.271561	0.830211
	ENSMUSG00000021792	-0.264535	9.01737	1.20876	0.271578	0.830211
	ENSMUSG00000031701	0.223517	6.40453	1.20599	0.272127	0.83098
	ENSMUSG00000049907	-0.798328	4.61374	1.20577	0.27217	0.83098
	ENSMUSG00000036568	-0.392327	3.79199	1.20168	0.272986	0.831209
	ENSMUSG00000040359	0.249886	5.7438	1.20145	0.273032	0.831209
	ENSMUSG00000025466	0.431092	4.98471	1.20107	0.273108	0.831209
	ENSMUSG00000047719	-0.255655	6.15903	1.201	0.273121	0.831209
	ENSMUSG00000061650	0.289857	6.11968	1.19964	0.273394	0.831209
	ENSMUSG00000033488	0.240992	6.89716	1.19842	0.273637	0.831209
	ENSMUSG00000021134	-0.340048	7.46269	1.198	0.273721	0.831209
	ENSMUSG00000001248	0.209811	7.52526	1.19722	0.273878	0.831209
	ENSMUSG00000028576	-0.636451	4.0254	1.19649	0.274024	0.831209
	ENSMUSG00000047187	0.16324	7.99402	1.19533	0.274257	0.831209
	ENSMUSG00000057113	0.294212	9.01604	1.1943	0.274465	0.831209
	ENSMUSG00000043398	-0.453104	4.1318	1.19412	0.2745	0.831209
	ENSMUSG00000035769	-0.837415	4.77811	1.19253	0.27482	0.831209
	ENSMUSG00000069268	0.60533	4.63999	1.19131	0.275065	0.831209
	ENSMUSG00000062588	0.574914	3.71794	1.19017	0.275295	0.831209
	ENSMUSG00000094026	-0.591745	4.1064	1.18965	0.2754	0.831209
	ENSMUSG00000023951	-0.425509	7.67043	1.18871	0.275591	0.831209
	ENSMUSG00000019738	-0.275371	5.61844	1.18765	0.275804	0.831209
	ENSMUSG00000027575	0.184967	7.30327	1.18699	0.275938	0.831209
	ENSMUSG00000074417	1.06164	5.17618	1.18625	0.276087	0.831209
	ENSMUSG00000024096	-0.173061	8.16954	1.18566	0.276208	0.831209
	ENSMUSG00000040822	0.308196	5.2841	1.1855	0.276239	0.831209
	ENSMUSG00000037434	-0.316584	4.86076	1.18421	0.276501	0.831209
	ENSMUSG00000053062	-0.240461	6.58033	1.18364	0.276616	0.831209
	ENSMUSG00000031790	0.423401	5.01811	1.18317	0.276711	0.831209
	ENSMUSG00000074272	-0.272438	5.56408	1.18093	0.277167	0.831209
	ENSMUSG00000042613	-0.463863	4.75672	1.17853	0.277655	0.831209
	ENSMUSG00000060073	0.175192	8.50761	1.17787	0.277789	0.831209
	ENSMUSG00000053580	0.35302	4.4773	1.17777	0.27781	0.831209
	ENSMUSG00000006442	0.412328	5.19211	1.17765	0.277835	0.831209
	ENSMUSG00000026656	-0.345779	5.38395	1.17715	0.277938	0.831209
	ENSMUSG00000041303	0.198136	6.65532	1.17653	0.278064	0.831209
	ENSMUSG00000063171	-0.36967	5.68139	1.17538	0.278298	0.831209
	ENSMUSG00000016356	-0.441739	4.13625	1.17537	0.278301	0.831209
	ENSMUSG00000028085	0.339902	4.88243	1.1751	0.278356	0.831209
	ENSMUSG00000041390	0.269135	7.91027	1.1746	0.278459	0.831209
	ENSMUSG00000048930	-0.267553	5.28145	1.17249	0.278891	0.831209
	ENSMUSG00000027236	0.194347	6.46284	1.17156	0.279081	0.831209
	ENSMUSG00000042349	0.427547	5.08916	1.17063	0.279271	0.831209
	ENSMUSG00000023942	0.372872	5.54528	1.17047	0.279305	0.831209
	ENSMUSG00000042363	0.252372	6.76355	1.16954	0.279496	0.831209
	ENSMUSG00000024413	0.20702	8.33927	1.16898	0.279611	0.831209
	ENSMUSG00000051256	0.314434	4.93269	1.16813	0.279786	0.831209
	ENSMUSG00000031976	-0.304421	5.31735	1.16706	0.280006	0.831209
	ENSMUSG00000049577	-0.410271	5.17159	1.16629	0.280164	0.831209
	ENSMUSG00000050043	0.32512	5.20852	1.16586	0.280253	0.831209
	ENSMUSG00000028860	-0.54758	4.82357	1.16514	0.280402	0.831209
	ENSMUSG00000043587	0.633996	5.05582	1.16504	0.280423	0.831209
	ENSMUSG00000022340	0.34769	4.65654	1.16377	0.280686	0.831482
	ENSMUSG00000025024	-0.405947	4.07241	1.16237	0.280975	0.831598
	ENSMUSG00000027166	0.384525	3.9351	1.16176	0.2811	0.831598
	ENSMUSG00000031996	-0.195009	11.0223	1.16111	0.281236	0.831598
	ENSMUSG00000018583	-0.232082	7.29243	1.15868	0.28174	0.832211
	ENSMUSG00000026309	0.239623	6.17678	1.15846	0.281785	0.832211
	ENSMUSG00000027304	0.192862	6.66649	1.15743	0.282	0.832343
	ENSMUSG00000034656	0.332208	5.51018	1.15447	0.282614	0.833298
	ENSMUSG00000066151	0.306595	4.9514	1.15366	0.282784	0.833298
	ENSMUSG00000027002	0.220869	5.86018	1.15341	0.282836	0.833298
	ENSMUSG00000021047	0.40871	4.22197	1.1504	0.283465	0.834514
	ENSMUSG00000024217	0.370208	3.99356	1.14909	0.28374	0.834514
	ENSMUSG00000028530	0.185889	8.60657	1.14899	0.283762	0.834514
	ENSMUSG00000022899	-0.521755	3.9962	1.14741	0.284091	0.834851
	ENSMUSG00000006931	-0.325648	5.73218	1.14681	0.284218	0.834851
	ENSMUSG00000020687	-0.184046	7.34966	1.14474	0.284653	0.835154
	ENSMUSG00000016128	-0.276285	5.72997	1.14312	0.284995	0.835154
	ENSMUSG00000041241	-0.317051	4.91367	1.14279	0.285063	0.835154
	ENSMUSG00000043190	0.279126	5.08742	1.14228	0.28517	0.835154
	ENSMUSG00000040565	-0.278666	4.57723	1.1416	0.285314	0.835154
	ENSMUSG00000022521	-0.247267	5.71658	1.14128	0.285382	0.835154
	ENSMUSG00000003814	0.322107	9.54921	1.14063	0.28552	0.835154
	ENSMUSG00000035007	-0.212518	6.39882	1.13899	0.285866	0.835431
	ENSMUSG00000070953	0.316182	5.91133	1.13856	0.285957	0.835431
	ENSMUSG00000054728	0.595524	4.65804	1.13519	0.286671	0.835964
	ENSMUSG00000003123	-0.369418	9.34436	1.13463	0.286789	0.835964
	ENSMUSG00000039804	0.389541	3.88864	1.13452	0.286814	0.835964
	ENSMUSG00000001383	-0.185351	6.68509	1.13447	0.286825	0.835964
	ENSMUSG00000004446	0.370041	5.32383	1.13161	0.287431	0.837232
	ENSMUSG00000021223	-0.364014	4.69213	1.13024	0.287724	0.837237
	ENSMUSG00000042743	-0.232915	5.58177	1.13	0.287776	0.837237
	ENSMUSG00000029070	0.278105	9.89213	1.12873	0.288046	0.837339
	ENSMUSG00000007837	0.234128	5.90442	1.12567	0.288702	0.837339
	ENSMUSG00000079523	0.361384	7.67546	1.12413	0.289031	0.837339
	ENSMUSG00000058298	0.371412	4.30253	1.12385	0.289092	0.837339
	ENSMUSG00000059796	0.213853	9.98057	1.12331	0.289206	0.837339
	ENSMUSG00000033540	0.374773	4.07148	1.12227	0.289431	0.837339
	ENSMUSG00000044749	-0.396733	7.24351	1.12157	0.28958	0.837339
	ENSMUSG00000069206	-0.320339	5.12455	1.12133	0.289632	0.837339
	ENSMUSG00000035671	0.297853	6.34581	1.12125	0.289649	0.837339
	ENSMUSG00000069743	-0.419164	4.21925	1.1201	0.289896	0.837339
	ENSMUSG00000040751	0.811087	3.93434	1.1194	0.290048	0.837339
	ENSMUSG00000072704	-0.202491	9.70439	1.11922	0.290086	0.837339
	ENSMUSG00000074794	-0.54229	6.18586	1.11884	0.290169	0.837339
	ENSMUSG00000028772	0.232698	5.91186	1.11863	0.290214	0.837339
	ENSMUSG00000049690	-0.39484	3.78029	1.11729	0.290503	0.837445
	ENSMUSG00000028926	-0.205207	7.86684	1.11661	0.29065	0.837445
	ENSMUSG00000029552	0.544326	5.26153	1.11537	0.290919	0.837445
	ENSMUSG00000029427	-0.270757	4.83682	1.11487	0.291025	0.837445
	ENSMUSG00000035401	0.43895	3.7733	1.11406	0.291202	0.837445
	ENSMUSG00000009207	0.364442	3.8419	1.11369	0.291281	0.837445
	ENSMUSG00000068923	-0.338223	4.90798	1.10686	0.292765	0.838326
	ENSMUSG00000038600	-0.698981	4.30715	1.10529	0.293107	0.838326
	ENSMUSG00000030704	-0.376152	4.64256	1.10516	0.293137	0.838326
	ENSMUSG00000073437	-0.445422	3.77177	1.10491	0.293192	0.838326
	ENSMUSG00000046756	0.256175	6.4929	1.10396	0.293398	0.838326
	ENSMUSG00000008398	0.204601	6.96317	1.10297	0.293615	0.838326
	ENSMUSG00000040552	0.503663	6.66277	1.10237	0.293746	0.838326
	ENSMUSG00000020828	-0.191114	7.01522	1.10226	0.29377	0.838326
	ENSMUSG00000079277	-0.615385	3.86884	1.10184	0.293863	0.838326
	ENSMUSG00000022472	0.415323	3.63236	1.10101	0.294044	0.838326
	ENSMUSG00000083289	-0.437414	5.62993	1.09969	0.294334	0.838326
	ENSMUSG00000005469	0.316894	8.19314	1.09892	0.294504	0.838326
	ENSMUSG00000036078	0.275028	6.14171	1.09852	0.294591	0.838326
	ENSMUSG00000021338	-0.402829	6.42224	1.0983	0.29464	0.838326
	ENSMUSG00000027091	-0.190186	6.37393	1.09775	0.29476	0.838326
	ENSMUSG00000030990	-0.284002	7.59608	1.09748	0.29482	0.838326
	ENSMUSG00000026103	-0.253682	8.26191	1.09745	0.294826	0.838326
	ENSMUSG00000024789	-0.198824	6.58447	1.09741	0.294835	0.838326
	ENSMUSG00000024446	0.279097	5.21859	1.09734	0.294852	0.838326
	ENSMUSG00000023980	0.259417	5.23306	1.09537	0.295285	0.839068
	ENSMUSG00000023087	0.431798	5.82456	1.09082	0.296289	0.840307
	ENSMUSG00000079003	0.267476	6.343	1.08994	0.296486	0.840307
	ENSMUSG00000020644	0.713354	4.67607	1.08879	0.296739	0.840307
	ENSMUSG00000078139	-0.258285	5.40815	1.08696	0.297146	0.840307
	ENSMUSG00000051730	-0.300902	4.46301	1.08618	0.297319	0.840307
	ENSMUSG00000039646	-0.237355	6.68224	1.08609	0.297339	0.840307
	ENSMUSG00000027499	-0.368067	4.84378	1.08574	0.297417	0.840307
	ENSMUSG00000020949	0.241753	5.88978	1.08562	0.297443	0.840307
	ENSMUSG00000058239	0.198284	6.59271	1.08555	0.297459	0.840307
	ENSMUSG00000066037	-0.277621	5.2884	1.0847	0.297649	0.840307
	ENSMUSG00000041355	0.216979	8.12297	1.082	0.29825	0.840307
	ENSMUSG00000041453	-0.192414	10.0862	1.082	0.298251	0.840307
	ENSMUSG00000027852	0.378374	4.26715	1.0816	0.298339	0.840307
	ENSMUSG00000027940	0.178425	8.49249	1.07968	0.29877	0.840307
	ENSMUSG00000052560	-0.214869	6.49181	1.07966	0.298773	0.840307
	ENSMUSG00000024516	0.314953	5.70027	1.07965	0.298777	0.840307
	ENSMUSG00000015247	-0.22185	6.59907	1.07938	0.298836	0.840307
	ENSMUSG00000079215	-0.335021	4.50111	1.0791	0.2989	0.840307
	ENSMUSG00000030147	0.496242	5.17537	1.07823	0.299095	0.840307
	ENSMUSG00000062373	0.228896	6.74208	1.07791	0.299165	0.840307
	ENSMUSG00000032741	-0.300811	4.18807	1.07642	0.2995	0.840763
	ENSMUSG00000063888	0.169062	7.89002	1.07529	0.299753	0.840787
	ENSMUSG00000028159	-0.384282	4.46975	1.07485	0.299853	0.840787
	ENSMUSG00000032407	-0.18328	7.71783	1.07041	0.300854	0.841647
	ENSMUSG00000024795	0.472294	3.94065	1.07022	0.300895	0.841647
	ENSMUSG00000006800	-0.229201	7.90934	1.0697	0.301012	0.841647
	ENSMUSG00000033983	0.237919	5.34034	1.0694	0.30108	0.841647
	ENSMUSG00000033705	0.231786	8.80963	1.06911	0.301147	0.841647
	ENSMUSG00000003949	-0.56546	5.60679	1.06648	0.301741	0.841647
	ENSMUSG00000066415	-0.186145	7.11881	1.06643	0.301752	0.841647
	ENSMUSG00000027797	0.401166	6.01976	1.06587	0.301881	0.841647
	ENSMUSG00000056305	0.406174	4.14314	1.06427	0.302244	0.841647
	ENSMUSG00000041343	-0.355059	4.52992	1.06376	0.302359	0.841647
	ENSMUSG00000018845	-0.371022	3.80281	1.06251	0.302644	0.841647
	ENSMUSG00000023169	0.520499	6.14453	1.06186	0.302792	0.841647
	ENSMUSG00000027782	-0.16987	7.82191	1.05992	0.303233	0.841647
	ENSMUSG00000045664	-0.32134	6.53351	1.05969	0.303286	0.841647
	ENSMUSG00000006307	-0.244787	4.93927	1.05949	0.303331	0.841647
	ENSMUSG00000022836	0.918876	7.74407	1.0582	0.303626	0.841647
	ENSMUSG00000029135	0.30783	8.4588	1.05748	0.30379	0.841647
	ENSMUSG00000022105	0.229268	7.7153	1.05709	0.30388	0.841647
	ENSMUSG00000049676	-0.438099	4.21099	1.05513	0.304329	0.841647
	ENSMUSG00000024754	0.24749	7.54868	1.05497	0.304364	0.841647
	ENSMUSG00000070720	-0.599185	4.04787	1.05435	0.304508	0.841647
	ENSMUSG00000049687	0.301555	4.98412	1.05332	0.304744	0.841647
	ENSMUSG00000057572	0.192564	6.17033	1.05239	0.304957	0.841647
	ENSMUSG00000018476	-0.35989	6.42518	1.05194	0.305061	0.841647
	ENSMUSG00000028156	0.185829	7.36636	1.05109	0.305256	0.841647
	ENSMUSG00000035469	0.365498	3.94268	1.05049	0.305395	0.841647
	ENSMUSG00000039835	-0.430973	4.52678	1.0489	0.30576	0.841647
	ENSMUSG00000026615	0.174622	9.74464	1.04841	0.305874	0.841647
	ENSMUSG00000067336	-0.200049	6.25002	1.04671	0.306267	0.841647
	ENSMUSG00000052013	-0.50844	4.38707	1.0463	0.306361	0.841647
	ENSMUSG00000032232	-0.229709	9.71263	1.04591	0.306452	0.841647
	ENSMUSG00000038866	0.224912	5.88235	1.04585	0.306464	0.841647
	ENSMUSG00000030272	0.262172	5.45487	1.04174	0.307417	0.841647
	ENSMUSG00000072692	-0.361464	4.60652	1.04103	0.307582	0.841647
	ENSMUSG00000002458	0.369407	4.40959	1.03954	0.307928	0.841647
	ENSMUSG00000022629	-0.305704	5.90795	1.03838	0.308198	0.841647
	ENSMUSG00000029535	-0.281357	5.03303	1.0377	0.308357	0.841647
	ENSMUSG00000011257	-0.284917	5.34259	1.03712	0.308493	0.841647
	ENSMUSG00000009828	0.336424	4.6544	1.03617	0.308715	0.841647
	ENSMUSG00000024132	-0.261102	6.43855	1.0361	0.308731	0.841647
	ENSMUSG00000030149	0.504966	4.06247	1.03597	0.308761	0.841647
	ENSMUSG00000026664	-0.287078	6.17944	1.03574	0.308815	0.841647
	ENSMUSG00000035798	-0.189771	7.34093	1.0355	0.308871	0.841647
	ENSMUSG00000097330	-0.297562	5.84327	1.033	0.309455	0.841647
	ENSMUSG00000047804	0.228728	5.76937	1.03175	0.309747	0.841647
	ENSMUSG00000036820	0.328953	4.52384	1.0312	0.309877	0.841647
	ENSMUSG00000032115	0.242449	6.01044	1.03111	0.309898	0.841647
	ENSMUSG00000024897	-0.388587	4.43741	1.02938	0.310305	0.841647
	ENSMUSG00000033735	-0.250684	5.48317	1.02707	0.310848	0.841647
	ENSMUSG00000024725	0.260901	7.67194	1.02592	0.311118	0.841647
	ENSMUSG00000027490	-0.299014	5.49916	1.02561	0.311193	0.841647
	ENSMUSG00000034413	0.236723	6.27265	1.02476	0.311392	0.841647
	ENSMUSG00000085519	-0.687244	4.07753	1.02472	0.311401	0.841647
	ENSMUSG00000036197	-0.171412	6.90885	1.02471	0.311404	0.841647
	ENSMUSG00000026307	0.273224	5.09352	1.02354	0.31168	0.841647
	ENSMUSG00000054942	-0.450191	4.89721	1.02344	0.311705	0.841647
	ENSMUSG00000024308	0.208554	10.6344	1.02307	0.311793	0.841647
	ENSMUSG00000025474	0.365082	4.11698	1.0228	0.311856	0.841647
	ENSMUSG00000041415	-0.229995	5.40829	1.01905	0.312744	0.841647
	ENSMUSG00000023286	0.20163	6.35167	1.01884	0.312794	0.841647
	ENSMUSG00000021596	0.581954	4.48336	1.01867	0.312834	0.841647
	ENSMUSG00000028291	0.25209	5.6833	1.01838	0.312904	0.841647
	ENSMUSG00000046562	-0.387908	4.01109	1.01811	0.312967	0.841647
	ENSMUSG00000048109	-0.272747	4.80476	1.0176	0.31309	0.841647
	ENSMUSG00000032411	-0.222313	8.29739	1.01748	0.313117	0.841647
	ENSMUSG00000055632	-0.420381	7.58493	1.01728	0.313165	0.841647
	ENSMUSG00000020528	-0.373387	4.02537	1.01671	0.3133	0.841647
	ENSMUSG00000033961	0.440748	3.82017	1.01613	0.313439	0.841647
	ENSMUSG00000018209	-0.262938	5.05384	1.01551	0.313586	0.841647
	ENSMUSG00000015944	0.228923	5.82632	1.01465	0.313793	0.841647
	ENSMUSG00000049576	-0.235467	5.59463	1.01439	0.313852	0.841647
	ENSMUSG00000021518	0.248257	5.68346	1.01379	0.313997	0.841647
	ENSMUSG00000020319	0.366338	4.70623	1.01372	0.314013	0.841647
	ENSMUSG00000059439	0.306966	4.24062	1.01321	0.314134	0.841647
	ENSMUSG00000055817	-0.326008	4.26106	1.01305	0.314172	0.841647
	ENSMUSG00000022000	-0.407941	3.94485	1.01271	0.314255	0.841647
	ENSMUSG00000030847	0.392149	5.10041	1.01266	0.314267	0.841647
	ENSMUSG00000041000	-0.4812	4.02905	1.01245	0.314316	0.841647
	ENSMUSG00000028494	0.451201	9.88832	1.01203	0.314418	0.841647
	ENSMUSG00000017801	0.313014	5.27862	1.01111	0.314637	0.841647
	ENSMUSG00000040433	-0.180972	9.39626	1.01022	0.314851	0.841647
	ENSMUSG00000024030	-0.338966	8.52225	1.0098	0.31495	0.841647
	ENSMUSG00000042476	0.454859	4.78443	1.00931	0.315067	0.841647
	ENSMUSG00000049532	-0.498688	3.67664	1.00886	0.315176	0.841647
	ENSMUSG00000016757	-0.240114	5.52268	1.00885	0.315178	0.841647
	ENSMUSG00000018740	0.410677	4.91968	1.00813	0.315352	0.841647
	ENSMUSG00000015461	0.240204	6.45089	1.00775	0.315443	0.841647
	ENSMUSG00000036864	0.490436	3.74334	1.00669	0.315696	0.841647
	ENSMUSG00000024529	0.450766	4.76307	1.00648	0.315748	0.841647
	ENSMUSG00000074405	-0.380967	3.9345	1.00584	0.315903	0.841647
	ENSMUSG00000052914	0.290757	5.02796	1.00577	0.315918	0.841647
	ENSMUSG00000076435	0.296858	6.19347	1.0053	0.31603	0.841647
	ENSMUSG00000024592	0.282941	5.17241	1.00302	0.316581	0.841881
	ENSMUSG00000031661	-0.476879	5.36754	1.00282	0.316628	0.841881
	ENSMUSG00000050796	0.27317	5.74107	1.00197	0.316835	0.841881
	ENSMUSG00000041846	0.295676	4.67899	1.00078	0.317122	0.841881
	ENSMUSG00000026820	0.344918	4.55239	1.0007	0.31714	0.841881
	ENSMUSG00000035367	0.263217	4.67082	1.00065	0.317154	0.841881
	ENSMUSG00000027661	-0.358465	4.68418	0.999523	0.317426	0.842071
	ENSMUSG00000022280	-0.182805	6.81818	0.998267	0.31773	0.842071
	ENSMUSG00000019362	0.172622	8.0624	0.998156	0.317757	0.842071
	ENSMUSG00000025245	0.302049	4.40462	0.997503	0.317915	0.842071
	ENSMUSG00000020412	0.219622	5.8845	0.994759	0.318582	0.842279
	ENSMUSG00000022426	-0.46945	3.61041	0.994653	0.318608	0.842279
	ENSMUSG00000032462	-0.294073	6.52693	0.99397	0.318774	0.842279
	ENSMUSG00000029992	-0.182744	7.95055	0.993565	0.318873	0.842279
	ENSMUSG00000028687	0.428397	4.51501	0.993364	0.318922	0.842279
	ENSMUSG00000018363	0.265497	5.08823	0.992919	0.31903	0.842279
	ENSMUSG00000089847	0.274054	5.16476	0.991251	0.319437	0.842897
	ENSMUSG00000022401	-0.323767	4.63005	0.990286	0.319672	0.84299
	ENSMUSG00000038072	-0.19956	5.84345	0.989639	0.319831	0.84299
	ENSMUSG00000050017	-0.371951	4.43866	0.988112	0.320204	0.84299
	ENSMUSG00000020423	-0.550764	5.59435	0.987164	0.320437	0.84299
	ENSMUSG00000032456	0.328802	5.33009	0.987061	0.320462	0.84299
	ENSMUSG00000026577	-0.211697	5.98012	0.986411	0.320621	0.84299
	ENSMUSG00000070871	0.205112	5.85872	0.985509	0.320842	0.84299
	ENSMUSG00000015305	0.44811	4.2813	0.985462	0.320854	0.84299
	ENSMUSG00000021033	0.321877	10.1024	0.98419	0.321166	0.843356
	ENSMUSG00000056121	-0.214108	6.66582	0.983268	0.321393	0.843498
	ENSMUSG00000072915	0.377801	3.94062	0.98095	0.321964	0.843557
	ENSMUSG00000020755	0.221229	5.06536	0.980751	0.322013	0.843557
	ENSMUSG00000068855	0.302725	6.69212	0.97992	0.322219	0.843557
	ENSMUSG00000022516	0.374526	4.61609	0.979489	0.322325	0.843557
	ENSMUSG00000033327	-0.262025	10.8147	0.979302	0.322371	0.843557
	ENSMUSG00000018965	0.230353	6.81097	0.977815	0.322739	0.843557
	ENSMUSG00000020098	-0.52859	4.09533	0.977686	0.322771	0.843557
	ENSMUSG00000022898	0.221464	6.29295	0.977194	0.322893	0.843557
	ENSMUSG00000004069	-0.270529	5.46257	0.976873	0.322972	0.843557
	ENSMUSG00000055204	-0.146137	8.26314	0.975632	0.32328	0.843909
	ENSMUSG00000079429	-0.419304	4.70163	0.97279	0.323985	0.844905
	ENSMUSG00000021113	-0.383289	4.00682	0.972701	0.324007	0.844905
	ENSMUSG00000025102	-0.273329	5.07171	0.971861	0.324217	0.844968
	ENSMUSG00000023110	0.237109	5.69403	0.971211	0.324378	0.844968
	ENSMUSG00000001995	-0.277364	5.03249	0.970467	0.324564	0.845
	ENSMUSG00000041740	0.24668	8.32056	0.96935	0.324842	0.845274
	ENSMUSG00000011096	0.233108	6.85454	0.967025	0.325423	0.845745
	ENSMUSG00000079179	0.213934	5.69432	0.96674	0.325494	0.845745
	ENSMUSG00000021767	-0.249915	5.72396	0.966545	0.325543	0.845745
	ENSMUSG00000027984	-0.248352	9.16343	0.965626	0.325774	0.845893
	ENSMUSG00000028028	0.255308	7.63392	0.962127	0.326652	0.846901
	ENSMUSG00000044807	-0.360093	4.7746	0.961055	0.326921	0.846901
	ENSMUSG00000028514	0.167929	7.1003	0.957801	0.327742	0.846901
	ENSMUSG00000020109	0.266305	5.04797	0.957094	0.32792	0.846901
	ENSMUSG00000040488	-0.312969	6.23229	0.956907	0.327967	0.846901
	ENSMUSG00000020778	0.427114	4.44483	0.956559	0.328055	0.846901
	ENSMUSG00000024193	-0.264435	6.8677	0.955453	0.328335	0.846901
	ENSMUSG00000047867	0.189382	7.38351	0.95413	0.32867	0.846901
	ENSMUSG00000015653	-0.662415	3.77848	0.953628	0.328798	0.846901
	ENSMUSG00000067212	-0.195255	9.03471	0.953306	0.328879	0.846901
	ENSMUSG00000038181	0.291482	5.11342	0.953174	0.328913	0.846901
	ENSMUSG00000028269	-0.247191	7.57061	0.952194	0.329161	0.846901
	ENSMUSG00000091512	0.22029	7.14547	0.951634	0.329304	0.846901
	ENSMUSG00000024290	-0.231969	5.8228	0.951377	0.329369	0.846901
	ENSMUSG00000054675	-0.316126	6.24139	0.951349	0.329376	0.846901
	ENSMUSG00000057842	-0.387397	4.36636	0.948795	0.330026	0.846901
	ENSMUSG00000021048	0.243822	6.28004	0.948491	0.330104	0.846901
	ENSMUSG00000027424	-0.316096	4.46646	0.947936	0.330245	0.846901
	ENSMUSG00000021725	0.354994	5.41579	0.947935	0.330246	0.846901
	ENSMUSG00000046721	-0.191009	6.60241	0.947351	0.330395	0.846901
	ENSMUSG00000017309	-0.452762	4.75809	0.947029	0.330477	0.846901
	ENSMUSG00000027284	0.275116	5.20759	0.946935	0.330501	0.846901
	ENSMUSG00000022205	0.244346	8.93167	0.945967	0.330748	0.846901
	ENSMUSG00000033849	-0.342607	9.12117	0.945857	0.330776	0.846901
	ENSMUSG00000028967	-0.801826	5.70662	0.945757	0.330802	0.846901
	ENSMUSG00000026839	-0.457962	4.95722	0.945745	0.330805	0.846901
	ENSMUSG00000034120	0.182373	7.73241	0.944992	0.330997	0.846901
	ENSMUSG00000054428	0.307165	6.78073	0.944847	0.331035	0.846901
	ENSMUSG00000044066	-0.1743	6.97655	0.943164	0.331466	0.846901
	ENSMUSG00000028495	-0.263756	5.54468	0.943146	0.33147	0.846901
	ENSMUSG00000019464	0.304489	4.89381	0.942671	0.331592	0.846901
	ENSMUSG00000039810	0.262738	5.76576	0.941448	0.331906	0.846901
	ENSMUSG00000055024	0.265849	5.29798	0.939718	0.33235	0.846901
	ENSMUSG00000027009	0.377786	6.01882	0.939454	0.332418	0.846901
	ENSMUSG00000037416	-0.205778	6.58012	0.939196	0.332485	0.846901
	ENSMUSG00000022372	0.415718	5.67347	0.938223	0.332735	0.846901
	ENSMUSG00000018287	-0.21736	5.98631	0.938196	0.332742	0.846901
	ENSMUSG00000021108	-0.303893	5.11512	0.937793	0.332846	0.846901
	ENSMUSG00000034334	0.254832	4.85555	0.937144	0.333013	0.846901
	ENSMUSG00000020440	-0.213796	7.19989	0.936789	0.333105	0.846901
	ENSMUSG00000026365	-0.275705	6.70412	0.933591	0.333932	0.848466
	ENSMUSG00000020901	0.540609	5.87951	0.933062	0.334068	0.848466
	ENSMUSG00000049606	0.248543	6.63078	0.932082	0.334322	0.848669
	ENSMUSG00000040283	-0.329806	8.13483	0.930414	0.334755	0.848751
	ENSMUSG00000038156	0.444542	8.40131	0.929543	0.334982	0.848751
	ENSMUSG00000026864	0.338166	11.1261	0.928943	0.335138	0.848751
	ENSMUSG00000040084	0.400306	5.19196	0.928483	0.335257	0.848751
	ENSMUSG00000020029	0.208899	10.2502	0.926994	0.335645	0.848751
	ENSMUSG00000005802	-0.150299	7.50855	0.925669	0.335991	0.848751
	ENSMUSG00000037731	0.25241	5.92426	0.925039	0.336155	0.848751
	ENSMUSG00000028484	-0.230925	6.19831	0.924751	0.33623	0.848751
	ENSMUSG00000039349	0.209665	11.0752	0.923141	0.336652	0.848751
	ENSMUSG00000022708	-0.244343	9.08115	0.922254	0.336884	0.848751
	ENSMUSG00000038143	0.211824	5.21938	0.921609	0.337053	0.848751
	ENSMUSG00000025510	0.415754	4.66784	0.920478	0.33735	0.848751
	ENSMUSG00000029726	-0.267974	5.71297	0.91911	0.337709	0.848751
	ENSMUSG00000027947	0.334623	4.90456	0.918895	0.337765	0.848751
	ENSMUSG00000031441	-0.293823	9.43703	0.918733	0.337808	0.848751
	ENSMUSG00000063802	-0.310937	4.85746	0.916821	0.338311	0.848751
	ENSMUSG00000082953	-0.28806	4.50922	0.916133	0.338492	0.848751
	ENSMUSG00000020692	0.377736	4.04907	0.914928	0.33881	0.848751
	ENSMUSG00000035173	-0.149879	7.58433	0.912615	0.339421	0.848751
	ENSMUSG00000036545	0.217548	8.68834	0.91254	0.339441	0.848751
	ENSMUSG00000026630	0.484085	3.84997	0.911428	0.339736	0.848751
	ENSMUSG00000083844	0.236522	5.28109	0.911301	0.339769	0.848751
	ENSMUSG00000061062	-0.450267	3.73439	0.91099	0.339852	0.848751
	ENSMUSG00000058230	0.163874	8.42692	0.910898	0.339876	0.848751
	ENSMUSG00000071757	-0.249196	6.11081	0.910818	0.339898	0.848751
	ENSMUSG00000033623	0.345448	4.23357	0.91026	0.340045	0.848751
	ENSMUSG00000028337	-0.550505	5.62912	0.909302	0.3403	0.848751
	ENSMUSG00000073412	-0.343612	4.55496	0.908562	0.340496	0.848751
	ENSMUSG00000013089	-0.196653	6.43961	0.908386	0.340543	0.848751
	ENSMUSG00000043505	0.282027	4.8083	0.908295	0.340567	0.848751
	ENSMUSG00000018672	-0.166796	7.39234	0.907843	0.340687	0.848751
	ENSMUSG00000019132	0.183616	8.0994	0.907211	0.340856	0.848751
	ENSMUSG00000052062	-0.398663	4.0724	0.905607	0.341283	0.848751
	ENSMUSG00000056050	-0.141884	8.68974	0.905282	0.341369	0.848751
	ENSMUSG00000035863	-0.316993	4.72806	0.905019	0.34144	0.848751
	ENSMUSG00000026698	0.266696	4.98435	0.904938	0.341461	0.848751
	ENSMUSG00000026000	0.200227	6.19328	0.904539	0.341567	0.848751
	ENSMUSG00000028795	0.198613	5.80371	0.904454	0.34159	0.848751
	ENSMUSG00000027111	0.250659	10.3895	0.903565	0.341828	0.848751
	ENSMUSG00000025810	-0.188612	9.12419	0.903168	0.341934	0.848751
	ENSMUSG00000037573	-0.325888	6.8639	0.902454	0.342125	0.848751
	ENSMUSG00000040181	0.25918	7.39494	0.900927	0.342533	0.848751
	ENSMUSG00000061665	-0.192575	8.3851	0.900402	0.342674	0.848751
	ENSMUSG00000022892	-0.229265	9.60442	0.899938	0.342798	0.848751
	ENSMUSG00000029392	-0.401882	4.10215	0.89992	0.342803	0.848751
	ENSMUSG00000015488	0.193496	6.80333	0.899401	0.342942	0.848751
	ENSMUSG00000036046	0.262665	8.89683	0.899007	0.343048	0.848751
	ENSMUSG00000007411	0.238736	5.80707	0.898953	0.343062	0.848751
	ENSMUSG00000052632	0.33403	4.43649	0.898675	0.343137	0.848751
	ENSMUSG00000063873	0.205954	6.68872	0.89841	0.343208	0.848751
	ENSMUSG00000030894	0.185695	8.18242	0.898013	0.343315	0.848751
	ENSMUSG00000009281	-0.265371	9.43736	0.897272	0.343514	0.848751
	ENSMUSG00000021260	-0.513776	4.4673	0.897048	0.343574	0.848751
	ENSMUSG00000024778	-0.26436	6.88522	0.896129	0.343822	0.848932
	ENSMUSG00000072623	0.217754	5.24723	0.894144	0.344357	0.849674
	ENSMUSG00000005973	-0.310922	6.5424	0.893683	0.344481	0.849674
	ENSMUSG00000033323	-0.190354	6.36447	0.890817	0.345256	0.849674
	ENSMUSG00000039308	-0.339589	3.91392	0.890358	0.34538	0.849674
	ENSMUSG00000023972	-0.644517	3.73492	0.889605	0.345584	0.849674
	ENSMUSG00000082519	-0.28193	5.50605	0.888831	0.345794	0.849674
	ENSMUSG00000024608	0.342724	4.02866	0.888742	0.345818	0.849674
	ENSMUSG00000000318	0.381429	8.88551	0.888428	0.345904	0.849674
	ENSMUSG00000034235	-0.455862	4.11368	0.887822	0.346068	0.849674
	ENSMUSG00000028497	-0.25972	8.09674	0.885888	0.346594	0.849674
	ENSMUSG00000027004	0.440182	3.98219	0.885789	0.346621	0.849674
	ENSMUSG00000045039	-0.226179	7.59592	0.885223	0.346775	0.849674
	ENSMUSG00000027752	0.403467	3.67216	0.883819	0.347158	0.849674
	ENSMUSG00000031446	-0.132136	8.79684	0.883707	0.347188	0.849674
	ENSMUSG00000048799	0.339487	4.06759	0.88296	0.347392	0.849674
	ENSMUSG00000041040	-0.214453	6.10175	0.882716	0.347459	0.849674
	ENSMUSG00000033430	-0.319182	4.64049	0.882134	0.347618	0.849674
	ENSMUSG00000028995	0.341975	4.20984	0.88069	0.348013	0.849674
	ENSMUSG00000041891	0.153176	8.1591	0.880571	0.348045	0.849674
	ENSMUSG00000048490	-0.283096	9.16343	0.879901	0.348229	0.849674
	ENSMUSG00000027395	-0.374171	4.48104	0.879764	0.348266	0.849674
	ENSMUSG00000036158	-0.319909	5.59725	0.879707	0.348282	0.849674
	ENSMUSG00000020744	0.341191	7.60211	0.879104	0.348447	0.849674
[truncated: 3,481 more rows]

## Sheet: Cross.Sex.Diet
	Gene	logFC	logCPM	LR	PValue	FDR
	ENSMUSG00000023150	2.15793	9.21933	14.8179	0.000118405	0.648862
	ENSMUSG00000027715	-2.05543	4.92194	12.673	0.000370982	0.911128
	ENSMUSG00000050345	1.97343	3.93146	11.7948	0.000593963	0.911128
	ENSMUSG00000040479	-1.63897	5.59142	11.2274	0.00080599	0.911128
	ENSMUSG00000044145	-1.69451	4.26293	10.9077	0.000957638	0.911128
	ENSMUSG00000022305	-1.80167	5.24227	10.832	0.000997585	0.911128
	ENSMUSG00000026197	-0.99656	5.29467	10.2601	0.00135938	0.94471
	ENSMUSG00000026482	0.841207	8.93881	10.2089	0.00139768	0.94471
	ENSMUSG00000006731	-2.42076	3.95722	9.50967	0.00204392	0.94471
	ENSMUSG00000020661	-1.21367	5.50898	9.30416	0.00228634	0.94471
	ENSMUSG00000049281	2.75765	4.1698	9.26306	0.00233822	0.94471
	ENSMUSG00000045328	-2.28806	3.56931	9.22466	0.00238777	0.94471
	ENSMUSG00000020594	1.20525	5.05166	9.20836	0.00240912	0.94471
	ENSMUSG00000021411	1.28437	7.58612	9.12083	0.00252715	0.94471
	ENSMUSG00000005233	-2.26682	3.85479	8.80565	0.00300299	0.94471
	ENSMUSG00000025780	1.21589	6.85684	8.66104	0.00325086	0.94471
	ENSMUSG00000022899	2.045	3.9962	8.54852	0.00345803	0.94471
	ENSMUSG00000030612	1.16494	4.70959	8.52468	0.00350363	0.94471
	ENSMUSG00000032782	-1.43686	4.35921	8.49219	0.00356675	0.94471
	ENSMUSG00000021732	1.09042	7.50965	8.48033	0.00359006	0.94471
	ENSMUSG00000068794	-2.08504	3.68268	8.46511	0.00362024	0.94471
	ENSMUSG00000026621	-1.60883	8.33854	8.1581	0.00428693	0.952818
	ENSMUSG00000020818	-0.905293	5.75088	8.05241	0.00454432	0.952818
	ENSMUSG00000026288	-1.39569	4.66045	7.99477	0.00469127	0.952818
	ENSMUSG00000018819	-1.54773	6.14492	7.92543	0.00487449	0.952818
	ENSMUSG00000036528	-1.1144	6.05713	7.81567	0.00517951	0.952818
	ENSMUSG00000051212	-1.68648	3.94454	7.7736	0.00530153	0.952818
	ENSMUSG00000025352	-1.58398	4.70211	7.6258	0.00575392	0.952818
	ENSMUSG00000018042	-1.11497	7.11546	7.61006	0.00580437	0.952818
	ENSMUSG00000017009	1.22485	7.91421	7.57307	0.00592468	0.952818
	ENSMUSG00000024371	1.20584	6.43042	7.53129	0.00606366	0.952818
	ENSMUSG00000006057	-0.940698	6.6203	7.51539	0.00611741	0.952818
	ENSMUSG00000069793	-1.25927	5.43135	7.50606	0.00614918	0.952818
	ENSMUSG00000015143	-1.21463	7.83269	7.46369	0.00629558	0.952818
	ENSMUSG00000029469	1.8509	4.66103	7.40981	0.00648693	0.952818
	ENSMUSG00000014470	-0.722486	7.04465	7.35318	0.00669444	0.952818
	ENSMUSG00000022180	-1.09256	6.20134	7.23215	0.00716095	0.952818
	ENSMUSG00000037058	0.870644	6.21144	7.22295	0.00719775	0.952818
	ENSMUSG00000031523	1.04552	6.96952	7.12356	0.00760777	0.952818
	ENSMUSG00000062417	-2.14582	3.84973	7.12117	0.00761791	0.952818
	ENSMUSG00000050930	1.26079	4.68737	7.03228	0.00800533	0.952818
	ENSMUSG00000031951	2.08845	3.86402	6.94926	0.0083854	0.952818
	ENSMUSG00000073982	-0.921059	6.5305	6.91156	0.00856401	0.952818
	ENSMUSG00000020437	-1.2691	5.83511	6.87654	0.00873343	0.952818
	ENSMUSG00000005360	2.17865	4.24327	6.86936	0.00876859	0.952818
	ENSMUSG00000038943	-1.76571	5.56725	6.81947	0.00901696	0.952818
	ENSMUSG00000021665	-1.1913	5.97876	6.7174	0.00954767	0.952818
	ENSMUSG00000028327	-3.12442	3.98031	6.63924	0.00997563	0.952818
	ENSMUSG00000020649	-1.76302	4.22197	6.57931	0.0103171	0.952818
	ENSMUSG00000032050	0.616128	8.75561	6.57715	0.0103296	0.952818
	ENSMUSG00000026358	-3.67589	6.90655	6.52048	0.0106639	0.952818
	ENSMUSG00000034656	-1.14163	5.51018	6.51536	0.0106947	0.952818
	ENSMUSG00000028850	-0.841197	5.52208	6.47763	0.0109241	0.952818
	ENSMUSG00000025795	-1.1232	8.73735	6.4693	0.0109754	0.952818
	ENSMUSG00000026321	-1.35825	5.32789	6.46259	0.0110169	0.952818
	ENSMUSG00000028581	-1.72917	4.4457	6.40108	0.0114051	0.952818
	ENSMUSG00000035783	1.77686	3.70343	6.35672	0.0116937	0.952818
	ENSMUSG00000020484	0.765074	8.64705	6.33136	0.0118621	0.952818
	ENSMUSG00000048327	-1.96005	4.37068	6.30811	0.0120187	0.952818
	ENSMUSG00000034842	1.02851	7.47009	6.3045	0.0120432	0.952818
	ENSMUSG00000051041	0.707644	8.21797	6.284	0.0121833	0.952818
	ENSMUSG00000039470	1.34417	4.44086	6.24581	0.0124488	0.952818
	ENSMUSG00000042447	1.10933	4.06872	6.22056	0.0126275	0.952818
	ENSMUSG00000062808	-1.97404	4.81592	6.20143	0.0127647	0.952818
	ENSMUSG00000030787	1.26257	7.44944	6.17854	0.0129309	0.952818
	ENSMUSG00000034158	0.832068	5.38698	6.17654	0.0129455	0.952818
	ENSMUSG00000023886	1.31543	5.21118	6.14917	0.0131474	0.952818
	ENSMUSG00000064267	-1.53984	3.89579	6.1445	0.0131821	0.952818
	ENSMUSG00000025277	1.19471	5.09545	6.1428	0.0131948	0.952818
	ENSMUSG00000022878	1.17329	10.0465	6.14223	0.0131991	0.952818
	ENSMUSG00000027070	3.26984	6.89563	6.1153	0.0134017	0.952818
	ENSMUSG00000020876	-0.684314	6.21201	6.08037	0.0136692	0.952818
	ENSMUSG00000032293	1.13499	5.1062	6.07398	0.0137187	0.952818
	ENSMUSG00000041199	1.54994	4.0299	6.06662	0.013776	0.952818
	ENSMUSG00000058385	-1.47447	6.48964	6.05153	0.0138943	0.952818
	ENSMUSG00000040612	1.40699	5.88765	6.02104	0.0141363	0.952818
	ENSMUSG00000022636	-1.28311	6.07436	5.99635	0.0143355	0.952818
	ENSMUSG00000045210	1.40546	3.81775	5.96628	0.014582	0.952818
	ENSMUSG00000032815	-3.03096	4.03987	5.9584	0.0146473	0.952818
	ENSMUSG00000059713	-1.21627	4.36813	5.95612	0.0146663	0.952818
	ENSMUSG00000040035	1.84769	6.29619	5.94149	0.0147885	0.952818
	ENSMUSG00000057396	1.3833	3.88343	5.91104	0.0150463	0.952818
	ENSMUSG00000018583	0.749969	7.29243	5.90178	0.0151256	0.952818
	ENSMUSG00000013663	0.774598	8.05124	5.89618	0.0151737	0.952818
	ENSMUSG00000021474	1.3046	5.08944	5.87096	0.0153927	0.952818
	ENSMUSG00000032217	-0.862779	5.13973	5.84426	0.0156279	0.952818
	ENSMUSG00000038252	-1.00404	5.57236	5.8403	0.0156631	0.952818
	ENSMUSG00000024187	-0.648725	8.56886	5.80512	0.0159796	0.952818
	ENSMUSG00000041731	-3.8429	5.80488	5.74786	0.0165087	0.952818
	ENSMUSG00000030424	1.16922	4.21784	5.72849	0.0166918	0.952818
	ENSMUSG00000005370	-1.02438	4.35867	5.71586	0.0168123	0.952818
	ENSMUSG00000063727	2.40653	4.38082	5.70967	0.0168717	0.952818
	ENSMUSG00000074743	1.78867	6.01523	5.705	0.0169167	0.952818
	ENSMUSG00000045414	0.886508	8.13492	5.68599	0.0171009	0.952818
	ENSMUSG00000049037	-1.01854	6.08696	5.68213	0.0171386	0.952818
	ENSMUSG00000020246	1.30992	3.76046	5.60765	0.0178822	0.952818
	ENSMUSG00000044600	1.05948	5.23637	5.59801	0.0179809	0.952818
	ENSMUSG00000024663	-0.957063	5.85344	5.59311	0.0180313	0.952818
	ENSMUSG00000057181	1.03112	4.52181	5.56275	0.0183466	0.952818
	ENSMUSG00000097462	1.58955	6.07364	5.53737	0.0186145	0.952818
	ENSMUSG00000009376	0.901961	6.7128	5.50531	0.0189588	0.952818
	ENSMUSG00000025024	1.27917	4.07241	5.49347	0.0190876	0.952818
	ENSMUSG00000032332	-1.22315	5.38307	5.47616	0.0192776	0.952818
	ENSMUSG00000042055	-1.27251	3.85139	5.47354	0.0193065	0.952818
	ENSMUSG00000044768	-0.862839	5.92255	5.467	0.0193788	0.952818
	ENSMUSG00000079553	-1.62969	3.5513	5.44917	0.0195776	0.952818
	ENSMUSG00000027288	0.489687	8.38039	5.4478	0.019593	0.952818
	ENSMUSG00000000693	-1.05862	5.00197	5.42475	0.0198533	0.952818
	ENSMUSG00000020186	1.37034	7.30509	5.40737	0.0200519	0.952818
	ENSMUSG00000024312	-0.906866	5.36848	5.40623	0.020065	0.952818
	ENSMUSG00000078249	-1.46577	6.69012	5.36965	0.0204901	0.952818
	ENSMUSG00000042761	1.15104	5.01563	5.36279	0.0205709	0.952818
	ENSMUSG00000089672	-1.67687	8.61246	5.35915	0.0206138	0.952818
	ENSMUSG00000026872	-1.54851	3.64497	5.30315	0.0212869	0.952818
	ENSMUSG00000052192	0.949591	4.48329	5.28716	0.0214833	0.952818
	ENSMUSG00000018774	-1.69762	8.97383	5.27507	0.0216329	0.952818
	ENSMUSG00000032487	-4.48434	7.59701	5.26904	0.021708	0.952818
	ENSMUSG00000028243	0.822409	6.22803	5.2111	0.0224431	0.952818
	ENSMUSG00000048677	-1.03744	6.20987	5.20519	0.0225196	0.952818
	ENSMUSG00000027304	-0.590111	6.66649	5.20284	0.02255	0.952818
	ENSMUSG00000051469	0.786273	4.92434	5.19608	0.0226379	0.952818
	ENSMUSG00000025743	-0.795027	8.09995	5.18995	0.0227178	0.952818
	ENSMUSG00000055782	1.08349	10.9916	5.18972	0.0227209	0.952818
	ENSMUSG00000041695	-1.70113	6.23513	5.18808	0.0227423	0.952818
	ENSMUSG00000029366	-0.949039	5.21344	5.18414	0.0227939	0.952818
	ENSMUSG00000051978	-0.990521	4.57079	5.16764	0.0230115	0.952818
	ENSMUSG00000039168	-0.563491	7.84332	5.1201	0.0236502	0.952818
	ENSMUSG00000060093	-1.22538	5.59251	5.1191	0.0236638	0.952818
	ENSMUSG00000027947	-1.15314	4.90456	5.11008	0.0237872	0.952818
	ENSMUSG00000037466	-1.35128	3.70927	5.09922	0.0239366	0.952818
	ENSMUSG00000056962	-1.11879	4.79064	5.09669	0.0239716	0.952818
	ENSMUSG00000038235	0.667699	7.49711	5.08255	0.0241678	0.952818
	ENSMUSG00000020021	-0.901567	5.46012	5.03763	0.0248024	0.952818
	ENSMUSG00000022836	-2.91138	7.74407	5.02882	0.0249289	0.952818
	ENSMUSG00000025722	-1.14923	3.87374	5.0259	0.0249709	0.952818
	ENSMUSG00000062593	-1.6694	7.69098	5.01501	0.0251284	0.952818
	ENSMUSG00000051910	1.12372	5.30995	4.98664	0.0255438	0.952818
	ENSMUSG00000006273	-0.958767	8.19481	4.96363	0.0258859	0.952818
	ENSMUSG00000069265	-1.20531	5.79755	4.9636	0.0258862	0.952818
	ENSMUSG00000003644	-1.10442	4.42655	4.95516	0.0260129	0.952818
	ENSMUSG00000038122	0.812026	6.80618	4.95363	0.026036	0.952818
	ENSMUSG00000039959	-0.767837	6.15468	4.93641	0.0262966	0.952818
	ENSMUSG00000034216	-0.696406	6.70071	4.93458	0.0263245	0.952818
	ENSMUSG00000095217	-1.58342	5.44529	4.92639	0.0264495	0.952818
	ENSMUSG00000032344	-1.64929	3.59309	4.91108	0.0266849	0.952818
	ENSMUSG00000030720	-1.10134	4.60236	4.90533	0.0267739	0.952818
	ENSMUSG00000021190	-1.1668	7.17131	4.88123	0.0271502	0.952818
	ENSMUSG00000029386	1.18409	4.29296	4.8704	0.0273211	0.952818
	ENSMUSG00000027177	0.650166	9.60227	4.86688	0.0273769	0.952818
	ENSMUSG00000020897	-1.52983	3.69292	4.86619	0.0273879	0.952818
	ENSMUSG00000029624	-0.997049	5.01099	4.86477	0.0274105	0.952818
	ENSMUSG00000090399	-0.843142	5.43624	4.85574	0.0275543	0.952818
	ENSMUSG00000097815	1.13407	6.41861	4.80772	0.0283326	0.952818
	ENSMUSG00000032220	-1.36293	6.99419	4.80362	0.0284	0.952818
	ENSMUSG00000029816	-2.48156	9.61694	4.80208	0.0284253	0.952818
	ENSMUSG00000031592	0.924828	5.10146	4.78709	0.0286739	0.952818
	ENSMUSG00000020592	-1.27323	6.27794	4.76982	0.0289628	0.952818
	ENSMUSG00000049307	-1.70197	4.12096	4.74805	0.0293315	0.952818
	ENSMUSG00000069274	-1.28911	6.77445	4.74469	0.0293888	0.952818
	ENSMUSG00000028459	-1.81206	4.90855	4.73835	0.0294974	0.952818
	ENSMUSG00000039167	0.55548	7.40613	4.73491	0.0295564	0.952818
	ENSMUSG00000031980	1.43784	7.16773	4.73241	0.0295994	0.952818
	ENSMUSG00000036585	0.936988	10.1257	4.70097	0.0301456	0.952818
	ENSMUSG00000005125	1.08362	7.6768	4.69696	0.030216	0.952818
	ENSMUSG00000025324	0.870378	6.95023	4.68504	0.0304263	0.952818
	ENSMUSG00000052296	-0.760312	6.58028	4.67978	0.0305196	0.952818
	ENSMUSG00000054814	1.13414	4.07555	4.67738	0.0305623	0.952818
	ENSMUSG00000046711	-1.49088	5.52795	4.67235	0.030652	0.952818
	ENSMUSG00000038024	-0.743668	7.19109	4.6512	0.0310318	0.952818
	ENSMUSG00000056888	-2.11183	5.26301	4.63628	0.0313028	0.952818
	ENSMUSG00000062257	1.41147	3.81855	4.63399	0.0313446	0.952818
	ENSMUSG00000031659	-1.09214	7.23576	4.61232	0.0317431	0.952818
	ENSMUSG00000021728	-1.90926	6.74575	4.61169	0.0317547	0.952818
	ENSMUSG00000076609	-3.89094	8.4991	4.60652	0.0318506	0.952818
	ENSMUSG00000028672	-0.80138	5.27134	4.60362	0.0319045	0.952818
	ENSMUSG00000037902	-0.89013	9.4034	4.59263	0.0321097	0.952818
	ENSMUSG00000021510	0.728454	5.55757	4.5731	0.0324777	0.952818
	ENSMUSG00000059049	-1.92598	4.65206	4.5568	0.0327882	0.952818
	ENSMUSG00000031517	1.76888	4.94405	4.53572	0.0331945	0.952818
	ENSMUSG00000036854	-1.62227	6.2319	4.52141	0.0334732	0.952818
	ENSMUSG00000023143	-1.07895	5.44439	4.52095	0.0334823	0.952818
	ENSMUSG00000051864	-0.522532	6.77818	4.50753	0.0337459	0.952818
	ENSMUSG00000070942	-1.2243	4.50611	4.50539	0.0337881	0.952818
	ENSMUSG00000027286	0.979948	4.45714	4.50055	0.033884	0.952818
	ENSMUSG00000057751	1.5386	4.07593	4.49521	0.0339899	0.952818
	ENSMUSG00000028496	0.90062	6.32228	4.49123	0.0340691	0.952818
	ENSMUSG00000003134	-1.12446	4.69652	4.48686	0.0341565	0.952818
	ENSMUSG00000035790	1.33122	4.30104	4.48452	0.0342031	0.952818
	ENSMUSG00000040433	0.549539	9.39626	4.4677	0.0345414	0.952818
	ENSMUSG00000022894	1.25624	4.61389	4.45988	0.0347	0.952818
	ENSMUSG00000050335	-1.69724	9.3171	4.4475	0.0349523	0.952818
	ENSMUSG00000052336	-1.24247	5.01503	4.43216	0.0352678	0.952818
	ENSMUSG00000073563	-0.894043	4.54289	4.43	0.0353125	0.952818
	ENSMUSG00000028402	0.472177	9.38784	4.41367	0.0356521	0.952818
	ENSMUSG00000068329	-0.883282	5.10834	4.40735	0.0357843	0.952818
	ENSMUSG00000019975	1.26559	3.82047	4.38929	0.0361653	0.952818
	ENSMUSG00000022940	0.683614	6.96994	4.3889	0.0361737	0.952818
	ENSMUSG00000029228	1.67299	4.7688	4.38838	0.0361847	0.952818
	ENSMUSG00000026483	-0.937706	8.95866	4.3859	0.0362374	0.952818
	ENSMUSG00000009013	-1.14895	3.85744	4.36944	0.0365891	0.952818
	ENSMUSG00000027843	-1.57207	4.35926	4.36141	0.0367618	0.952818
	ENSMUSG00000061991	-1.44241	6.65169	4.34301	0.0371613	0.952818
	ENSMUSG00000030275	0.424932	9.49413	4.33466	0.037344	0.952818
	ENSMUSG00000036106	0.769411	6.45452	4.32459	0.0375654	0.952818
	ENSMUSG00000006585	-1.18858	4.90298	4.31585	0.037759	0.952818
	ENSMUSG00000029203	0.478669	7.14217	4.31512	0.037775	0.952818
	ENSMUSG00000030513	1.24893	6.77534	4.31187	0.0378474	0.952818
	ENSMUSG00000030554	-2.93053	6.37734	4.30643	0.0379686	0.952818
	ENSMUSG00000020463	0.679619	5.29488	4.28751	0.0383935	0.952818
	ENSMUSG00000059901	-1.18343	4.7189	4.28445	0.0384626	0.952818
	ENSMUSG00000063931	-0.522034	8.07349	4.28224	0.0385125	0.952818
	ENSMUSG00000033735	0.722467	5.48317	4.26855	0.038824	0.952818
	ENSMUSG00000011877	-0.925111	4.89718	4.25811	0.0390634	0.952818
	ENSMUSG00000023942	-0.976153	5.54528	4.24583	0.0393467	0.952818
	ENSMUSG00000032263	0.654612	7.55634	4.2434	0.0394032	0.952818
	ENSMUSG00000025586	1.03019	4.48757	4.24156	0.0394459	0.952818
	ENSMUSG00000048799	-1.0842	4.06759	4.23997	0.0394829	0.952818
	ENSMUSG00000002847	-1.12255	6.92838	4.20974	0.0401926	0.952818
	ENSMUSG00000020354	1.1003	4.73811	4.20395	0.0403298	0.952818
	ENSMUSG00000033417	-0.708894	4.757	4.20162	0.0403855	0.952818
	ENSMUSG00000006941	0.561586	6.11007	4.17081	0.0411262	0.952818
	ENSMUSG00000074867	0.928634	4.52619	4.16224	0.0413347	0.952818
	ENSMUSG00000014195	-0.642601	6.17038	4.15383	0.0415405	0.952818
	ENSMUSG00000026463	0.789053	7.60899	4.14771	0.0416908	0.952818
	ENSMUSG00000028028	-0.75863	7.63392	4.1389	0.0419084	0.952818
	ENSMUSG00000026193	-0.98209	9.88077	4.12885	0.0421579	0.952818
	ENSMUSG00000024759	0.755009	5.88726	4.12623	0.0422234	0.952818
	ENSMUSG00000036086	-1.31787	3.93408	4.12436	0.04227	0.952818
	ENSMUSG00000028300	0.690615	9.54538	4.12164	0.0423381	0.952818
	ENSMUSG00000006715	-1.27952	4.19883	4.1138	0.0425346	0.952818
	ENSMUSG00000043090	-0.906311	4.95134	4.09979	0.0428885	0.952818
	ENSMUSG00000076613	-3.67392	4.2323	4.09853	0.0429205	0.952818
	ENSMUSG00000026360	-1.90971	6.23829	4.09706	0.0429578	0.952818
	ENSMUSG00000040950	0.808049	7.51891	4.09641	0.0429744	0.952818
	ENSMUSG00000038648	0.7745	5.51554	4.07728	0.0434635	0.952818
	ENSMUSG00000037280	-1.912	4.49882	4.06105	0.0438833	0.952818
	ENSMUSG00000019960	0.773929	7.69759	4.06071	0.0438921	0.952818
	ENSMUSG00000067288	-0.770663	6.41266	4.05815	0.0439586	0.952818
	ENSMUSG00000074649	-0.686519	6.86439	4.03988	0.0444369	0.952818
	ENSMUSG00000021322	-1.16243	4.55819	4.03118	0.0446667	0.952818
	ENSMUSG00000013997	1.252	3.58013	4.01844	0.0450054	0.952818
	ENSMUSG00000030204	-0.505105	6.6902	4.01629	0.0450627	0.952818
	ENSMUSG00000027346	-0.60399	6.20084	4.0083	0.0452768	0.952818
	ENSMUSG00000039473	-0.507212	6.81301	3.99424	0.045656	0.952818
	ENSMUSG00000087150	-1.14497	4.5832	3.99032	0.0457623	0.952818
	ENSMUSG00000028896	-0.802163	5.28633	3.9845	0.0459207	0.952818
	ENSMUSG00000006304	-0.644438	6.80673	3.95757	0.0466611	0.952818
	ENSMUSG00000033705	-0.644268	8.80963	3.95361	0.0467709	0.952818
	ENSMUSG00000000282	-0.842603	5.14464	3.94398	0.0470394	0.952818
[truncated: 5,231 more rows]

## Sheet: Sex
	Gene	logFC	logCPM	LR	PValue	FDR
[truncated: 5,480 more rows]

## Sheet: Diet
	Gene	logFC	logCPM	LR	PValue	FDR
[truncated: 5,480 more rows]

[truncated: 1 more sheets: PerContextLog2(FC)]
