# Supplementary material for: Parent-of-origin effects propagate through networks to shape metabolic traits
Source: bioRxiv preprint, doi:10.1101/2021.08.10.455860, version 1 (2021-08-11)
Supplement: Supplemental Table 4 [file 455860_file06.xlsx]

## Sheet: WAT
	No Propogation										Affinity Propogation
	GeneSet	Description	Size	Expect	Ratio	P value	FDR	Class	Count		GeneSet	Description	Size	Expect	Ratio	P value	FDR	Class	Count
	GO:0051046	regulation of secretion	231	1.6583	6.0302	3.2257e-06	0.0118	GO_Biological Process	9.99988		GO:0016021	integral component of membrane	1149	8.2485	2.7884	1.9353e-07	0.0019615	GO_Cell Component	23.0001
	GO:0002790	peptide secretion	186	1.3353	6.7402	4.4383e-06	0.0118	GO_Biological Process	9.00019		GO:0006875	cellular metal ion homeostasis	146	1.0481	7.6327	6.5874e-06	0.01265	GO_Biological Process	7.99983
	GO:0006875	cellular metal ion homeostasis	146	1.0481	7.6327	6.5874e-06	0.01265	GO_Biological Process	7.99983		GO:0002791	regulation of peptide secretion	156	1.1199	7.1435	1.0771e-05	0.01482	GO_Biological Process	8.00001
	GO:0046903	secretion	325	2.3331	4.7147	1.0264e-05	0.01482	GO_Biological Process	10.9999		GO:0050709	negative regulation of protein secretion	49	0.35177	14.214	2.1865e-05	0.01482	GO_Biological Process	5.00006
	GO:0002791	regulation of peptide secretion	156	1.1199	7.1435	1.0771e-05	0.01482	GO_Biological Process	8.00001		GO:0051047	positive regulation of secretion	130	0.93326	7.5006	3.0273e-05	0.015855	GO_Biological Process	7.00001
	GO:0050801	ion homeostasis	210	1.5076	5.9699	1.1997e-05	0.01482	GO_Biological Process	9.00022		MP:0003121	genetic imprinting	10	0.071789	41.789	3.9491e-05	0.0175	Mammalian Phenotype Ontology	2.99999
	GO:0055082	cellular chemical homeostasis	215	1.5435	5.831	1.4518e-05	0.01482	GO_Biological Process	9.00015		GO:0023052	signaling	1514	10.869	2.0241	0.00012845	0.04	GO_Biological Process	21.9999
	GO:0055065	metal ion homeostasis	163	1.1702	6.8367	1.4884e-05	0.01482	GO_Biological Process	8.00031		MP:0005466	abnormal T-helper 2 physiology	19	0.1364	21.994	0.00030498	0.073209	Mammalian Phenotype Ontology	2.99998
	GO:1903530	regulation of secretion by cell	218	1.565	5.7508	1.6238e-05	0.01482	GO_Biological Process	9		GO:0050877	nervous system process	192	1.3783	5.0785	0.00035516	0.081844	GO_Biological Process	6.9997
	GO:0030003	cellular cation homeostasis	166	1.1917	6.7131	1.7014e-05	0.01482	GO_Biological Process	8		GO:0090196	regulation of chemokine secretion	5	0.035894	55.719	0.00049475	0.096619	GO_Biological Process	1.99998
	GO:0006874	cellular calcium ion homeostasis	122	0.87582	7.9925	2.0006e-05	0.01482	GO_Biological Process	6.99999		GO:0006044	N-acetylglucosamine metabolic process	5	0.035894	55.719	0.00049475	0.096619	GO_Biological Process	1.99998
	GO:0006873	cellular ion homeostasis	170	1.2204	6.5552	2.0251e-05	0.01482	GO_Biological Process	7.99997		MP:0010942	abnormal respiratory epithelium morphology	61	0.43791	9.1342	0.00087603	0.14628	Mammalian Phenotype Ontology	3.99996
	GO:0050709	negative regulation of protein secretion	49	0.35177	14.214	2.1865e-05	0.01482	GO_Biological Process	5.00006		GO:0051482	positive regulation of cytosolic calcium ion concentration involved in phospholipase C-activating G protein-coupled signaling pathway	8	0.057431	34.824	0.0013666	0.19439	GO_Biological Process	1.99998
	GO:0055074	calcium ion homeostasis	126	0.90454	7.7387	2.4701e-05	0.015527	GO_Biological Process	6.99996		GO:0042127	regulation of cell proliferation	488	3.5033	2.8545	0.0017498	0.22401	GO_Biological Process	10.0002
	GO:0072503	cellular divalent inorganic cation homeostasis	127	0.91172	7.6778	2.6008e-05	0.015527	GO_Biological Process	7
	GO:0032940	secretion by cell	294	2.1106	4.738	2.749e-05	0.015527	GO_Biological Process	10
	GO:0009306	protein secretion	178	1.2778	6.2606	2.8299e-05	0.015527	GO_Biological Process	7.99979
	GO:0051047	positive regulation of secretion	130	0.93326	7.5006	3.0273e-05	0.015855	GO_Biological Process	7.00001
	GO:0002792	negative regulation of peptide secretion	53	0.38048	13.141	3.2229e-05	0.016145	GO_Biological Process	4.99989
	GO:0072507	divalent inorganic cation homeostasis	133	0.95479	7.3314	3.5101e-05	0.016852	GO_Biological Process	6.99995
	GO:0055080	cation homeostasis	185	1.3281	6.0237	3.7401e-05	0.017238	GO_Biological Process	8.00008
	GO:0051480	regulation of cytosolic calcium ion concentration	93	0.66764	8.9869	4.3471e-05	0.017952	GO_Biological Process	6.00001
	GO:0098771	inorganic ion homeostasis	189	1.3568	5.8962	4.3626e-05	0.017952	GO_Biological Process	7.99996
	GO:0048878	chemical homeostasis	319	2.2901	4.3667	5.5576e-05	0.021739	GO_Biological Process	10.0002
	GO:0019725	cellular homeostasis	255	1.8306	4.9164	5.6603e-05	0.021739	GO_Biological Process	8.99996
	GO:0050708	regulation of protein secretion	147	1.0553	6.6332	6.6817e-05	0.024834	GO_Biological Process	7.00002
	GO:0050707	regulation of cytokine secretion	62	0.44509	11.234	6.9354e-05	0.024972	GO_Biological Process	5.00014
	GO:0042592	homeostatic process	577	4.1422	3.1384	0.00010546	0.036418	GO_Biological Process	12.9999
	GO:1903531	negative regulation of secretion by cell	68	0.48816	10.242	0.00010829	0.036418	GO_Biological Process	4.99973
	GO:0032879	regulation of localization	852	6.1164	2.6159	0.00011063	0.036418	GO_Biological Process	15.9999
	GO:0050663	cytokine secretion	69	0.49534	10.094	0.00011615	0.037174	GO_Biological Process	4.99996
	GO:0023052	signaling	1514	10.869	2.0241	0.00012845	0.04	GO_Biological Process	21.9999
	GO:0051048	negative regulation of secretion	71	0.5097	9.8097	0.00013317	0.040378	GO_Biological Process	5
	GO:0051224	negative regulation of protein transport	72	0.51688	9.6734	0.00014236	0.042059	GO_Biological Process	4.99999
	GO:1904950	negative regulation of establishment of protein localization	73	0.52406	9.5409	0.00015204	0.043795	GO_Biological Process	5
	GO:0050877	nervous system process	192	1.3783	5.0785	0.00035516	0.081844	GO_Biological Process	6.9997
	GO:0090196	regulation of chemokine secretion	5	0.035894	55.719	0.00049475	0.096619	GO_Biological Process	1.99998
	GO:0006044	N-acetylglucosamine metabolic process	5	0.035894	55.719	0.00049475	0.096619	GO_Biological Process	1.99998
	GO:0042221	response to chemical	1184	8.4998	2.1177	0.00052672	0.099489	GO_Biological Process	18
	GO:0051482	positive regulation of cytosolic calcium ion concentration involved in phospholipase C-activating G protein-coupled signaling pathway	8	0.057431	34.824	0.0013666	0.19439	GO_Biological Process	1.99998
	GO:0042127	regulation of cell proliferation	488	3.5033	2.8545	0.0017498	0.22401	GO_Biological Process	10.0002
	GO:0016021	integral component of membrane	1149	8.2485	2.7884	1.9353e-07	0.0019615	GO_Cell Component	23.0001
	GO:0031224	intrinsic component of membrane	1183	8.4926	2.7082	3.4047e-07	0.0019615	GO_Cell Component	22.9997
	GO:0044425	membrane part	1603	11.508	2.1724	5.1206e-06	0.0118	GO_Cell Component	25
	mmu04060	Cytokine-cytokine receptor interaction	49	0.35177	14.214	2.1865e-05	0.01482	KEGG	5.00006
	MP:0003121	genetic imprinting	10	0.071789	41.789	3.9491e-05	0.0175	Mammalian Phenotype Ontology	2.99999
	MP:0005466	abnormal T-helper 2 physiology	19	0.1364	21.994	0.00030498	0.073209	Mammalian Phenotype Ontology	2.99998
	MP:0010942	abnormal respiratory epithelium morphology	61	0.43791	9.1342	0.00087603	0.14628	Mammalian Phenotype Ontology	3.99996
	MP:0002152	abnormal brain morphology	478	3.4315	2.9142	0.0014939	0.20491	Mammalian Phenotype Ontology	10.0001

## Sheet: GeneSets
Net Query			Background Set
Gene	Ensembl		Ensembl
Atp2b4	ENSMUSG00000026463		ENSMUSG00000026621
Car3	ENSMUSG00000027559		ENSMUSG00000042761
1190002N15Rik	ENSMUSG00000045414		ENSMUSG00000026197
Cdkn1c	ENSMUSG00000037664		ENSMUSG00000024747
Sgce	ENSMUSG00000004631		ENSMUSG00000040035
Mrap2	ENSMUSG00000042761		ENSMUSG00000021411
Prr5	ENSMUSG00000036106		ENSMUSG00000049281
Ildr2	ENSMUSG00000040612		ENSMUSG00000021665
Peg3	ENSMUSG00000002265		ENSMUSG00000023886
Nfib	ENSMUSG00000008575		ENSMUSG00000058454
Il33	ENSMUSG00000024810		ENSMUSG00000033417
Scn3b	ENSMUSG00000049281		ENSMUSG00000030225
Disp2	ENSMUSG00000040035		ENSMUSG00000005370
Nnat	ENSMUSG00000067786		ENSMUSG00000017670
Chst2	ENSMUSG00000033350		ENSMUSG00000027715
Plcd1	ENSMUSG00000010660		ENSMUSG00000028496
Tnfrsf11a	ENSMUSG00000026321		ENSMUSG00000029716
F2r	ENSMUSG00000048376		ENSMUSG00000023150
Hexb	ENSMUSG00000021665		ENSMUSG00000052336
Hmgcr	ENSMUSG00000021670		ENSMUSG00000029366
Tpcn2	ENSMUSG00000048677		ENSMUSG00000026358
Rpa2	ENSMUSG00000028884		ENSMUSG00000024810
Srgn	ENSMUSG00000020077		ENSMUSG00000026482
Slc48a1	ENSMUSG00000081534		ENSMUSG00000022878
Tnfrsf21	ENSMUSG00000023915		ENSMUSG00000041895
Il1rl1	ENSMUSG00000026069		ENSMUSG00000029675
Dhcr7	ENSMUSG00000058454		ENSMUSG00000069274
Tfr2	ENSMUSG00000029716		ENSMUSG00000045414
Art2a-ps	ENSMUSG00000092517		ENSMUSG00000057751
B430306N03Rik	ENSMUSG00000043740		ENSMUSG00000042978
Marc1	ENSMUSG00000026621		ENSMUSG00000050345
Cdk18	ENSMUSG00000026437		ENSMUSG00000024371
Galnt6	ENSMUSG00000037280		ENSMUSG00000027559
Ero1l	ENSMUSG00000021831		ENSMUSG00000031980
Nrcam	ENSMUSG00000020598		ENSMUSG00000001786
Wisp2	ENSMUSG00000027656		ENSMUSG00000025780
Cx3cr1	ENSMUSG00000052336		ENSMUSG00000041773
H13	ENSMUSG00000019188		ENSMUSG00000040612
			ENSMUSG00000036106
			ENSMUSG00000041199
			ENSMUSG00000049624
			ENSMUSG00000001768
			ENSMUSG00000039168
			ENSMUSG00000028850
			ENSMUSG00000028024
			ENSMUSG00000038235
			ENSMUSG00000020173
			ENSMUSG00000022636
			ENSMUSG00000024481
			ENSMUSG00000003644
			ENSMUSG00000020594
			ENSMUSG00000032841
			ENSMUSG00000040950
			ENSMUSG00000038943
			ENSMUSG00000021732
			ENSMUSG00000022180
			ENSMUSG00000032038
			ENSMUSG00000028128
			ENSMUSG00000050930
			ENSMUSG00000038776
			ENSMUSG00000024187
			ENSMUSG00000001630
			ENSMUSG00000062417
			ENSMUSG00000020818
			ENSMUSG00000020315
			ENSMUSG00000006304
			ENSMUSG00000027076
			ENSMUSG00000020661
			ENSMUSG00000007872
			ENSMUSG00000087070
			ENSMUSG00000048376
			ENSMUSG00000037902
			ENSMUSG00000028884
			ENSMUSG00000029234
			ENSMUSG00000031592
			ENSMUSG00000029624
			ENSMUSG00000027177
			ENSMUSG00000082286
			ENSMUSG00000028402
			ENSMUSG00000032026
			ENSMUSG00000016487
			ENSMUSG00000069793
			ENSMUSG00000034687
			ENSMUSG00000030513
			ENSMUSG00000063931
			ENSMUSG00000028459
			ENSMUSG00000006273
			ENSMUSG00000024074
			ENSMUSG00000020917
			ENSMUSG00000038393
			ENSMUSG00000020023
			ENSMUSG00000060093
			ENSMUSG00000022305
			ENSMUSG00000040479
			ENSMUSG00000051748
			ENSMUSG00000029765
			ENSMUSG00000022754
			ENSMUSG00000037466
			ENSMUSG00000052396
			ENSMUSG00000002847
			ENSMUSG00000000301
			ENSMUSG00000044285
			ENSMUSG00000097815
			ENSMUSG00000042985
			ENSMUSG00000027346
			ENSMUSG00000067786
			ENSMUSG00000039701
			ENSMUSG00000021670
			ENSMUSG00000045328
			ENSMUSG00000020458
			ENSMUSG00000036819
			ENSMUSG00000021807
			ENSMUSG00000042055
			ENSMUSG00000032782
			ENSMUSG00000069265
			ENSMUSG00000029919
			ENSMUSG00000022178
			ENSMUSG00000026288
			ENSMUSG00000038725
			ENSMUSG00000064246
			ENSMUSG00000032344
			ENSMUSG00000024663
			ENSMUSG00000046711
			ENSMUSG00000031604
			ENSMUSG00000002265
			ENSMUSG00000026463
			ENSMUSG00000097462
			ENSMUSG00000032418
			ENSMUSG00000035783
			ENSMUSG00000062808
			ENSMUSG00000003099
			ENSMUSG00000027282
			ENSMUSG00000028909
			ENSMUSG00000050555
			ENSMUSG00000072244
			ENSMUSG00000031489
			ENSMUSG00000038252
			ENSMUSG00000026170
			ENSMUSG00000074211
			ENSMUSG00000068794
			ENSMUSG00000005124
			ENSMUSG00000034842
			ENSMUSG00000041577
			ENSMUSG00000030751
			ENSMUSG00000046070
			ENSMUSG00000003660
			ENSMUSG00000037278
			ENSMUSG00000068114
			ENSMUSG00000032220
			ENSMUSG00000020359
			ENSMUSG00000005360
			ENSMUSG00000006850
			ENSMUSG00000020176
			ENSMUSG00000022974
			ENSMUSG00000021510
			ENSMUSG00000001552
			ENSMUSG00000056888
			ENSMUSG00000055320
			ENSMUSG00000009013
			ENSMUSG00000064168
			ENSMUSG00000018501
			ENSMUSG00000049502
			ENSMUSG00000085471
			ENSMUSG00000020246
			ENSMUSG00000032531
			ENSMUSG00000006517
			ENSMUSG00000024053
			ENSMUSG00000048387
			ENSMUSG00000069272
			ENSMUSG00000020653
			ENSMUSG00000036098
			ENSMUSG00000034216
			ENSMUSG00000025105
			ENSMUSG00000026321
			ENSMUSG00000016458
			ENSMUSG00000006494
			ENSMUSG00000067106
			ENSMUSG00000015837
			ENSMUSG00000075254
			ENSMUSG00000021708
			ENSMUSG00000026782
			ENSMUSG00000006715
			ENSMUSG00000029430
			ENSMUSG00000028264
			ENSMUSG00000028671
			ENSMUSG00000069300
			ENSMUSG00000058297
			ENSMUSG00000025722
			ENSMUSG00000020186
			ENSMUSG00000023915
			ENSMUSG00000031503
			ENSMUSG00000032802
			ENSMUSG00000031517
			ENSMUSG00000020914
			ENSMUSG00000071337
			ENSMUSG00000020484
			ENSMUSG00000031647
			ENSMUSG00000025586
			ENSMUSG00000032812
			ENSMUSG00000021666
			ENSMUSG00000027247
			ENSMUSG00000028970
			ENSMUSG00000028124
			ENSMUSG00000021806
			ENSMUSG00000021466
			ENSMUSG00000055782
			ENSMUSG00000014470
			ENSMUSG00000009907
			ENSMUSG00000020634
			ENSMUSG00000029076
			ENSMUSG00000037280
			ENSMUSG00000025795
			ENSMUSG00000051950
			ENSMUSG00000044674
			ENSMUSG00000019872
			ENSMUSG00000028270
			ENSMUSG00000017715
			ENSMUSG00000022884
			ENSMUSG00000066026
			ENSMUSG00000032452
			ENSMUSG00000027217
			ENSMUSG00000006731
			ENSMUSG00000002297
			ENSMUSG00000038122
			ENSMUSG00000048327
			ENSMUSG00000047222
			ENSMUSG00000094320
			ENSMUSG00000027605
			ENSMUSG00000020463
			ENSMUSG00000030787
			ENSMUSG00000024168
			ENSMUSG00000041559
			ENSMUSG00000025348
			ENSMUSG00000027610
			ENSMUSG00000029386
			ENSMUSG00000029073
			ENSMUSG00000050549
			ENSMUSG00000094947
			ENSMUSG00000045287
			ENSMUSG00000063727
			ENSMUSG00000058385
			ENSMUSG00000003534
			ENSMUSG00000062593
			ENSMUSG00000031523
			ENSMUSG00000010554
			ENSMUSG00000028862
			ENSMUSG00000078234
			ENSMUSG00000020415
			ENSMUSG00000020843
			ENSMUSG00000053317
			ENSMUSG00000029456
			ENSMUSG00000024283
			ENSMUSG00000031628
			ENSMUSG00000054951
			ENSMUSG00000095217
			ENSMUSG00000057181
			ENSMUSG00000024369
			ENSMUSG00000030203
			ENSMUSG00000034282
			ENSMUSG00000089672
			ENSMUSG00000000693
			ENSMUSG00000071984
			ENSMUSG00000034187
			ENSMUSG00000030204
			ENSMUSG00000042594
			ENSMUSG00000038587
			ENSMUSG00000038437
			ENSMUSG00000027001
			ENSMUSG00000064043
			ENSMUSG00000015027
			ENSMUSG00000018819
			ENSMUSG00000020649
			ENSMUSG00000032050
			ENSMUSG00000005125
			ENSMUSG00000053754
			ENSMUSG00000036941
			ENSMUSG00000029096
			ENSMUSG00000022361
			ENSMUSG00000034667
			ENSMUSG00000024927
			ENSMUSG00000027463
			ENSMUSG00000030323
			ENSMUSG00000018362
			ENSMUSG00000045917
			ENSMUSG00000078249
			ENSMUSG00000021701
			ENSMUSG00000037936
			ENSMUSG00000052837
			ENSMUSG00000032652
			ENSMUSG00000032294
			ENSMUSG00000062646
			ENSMUSG00000022808
			ENSMUSG00000002083
			ENSMUSG00000026142
			ENSMUSG00000044145
			ENSMUSG00000035901
			ENSMUSG00000048960
			ENSMUSG00000020900
			ENSMUSG00000048218
			ENSMUSG00000000958
			ENSMUSG00000001525
			ENSMUSG00000061068
			ENSMUSG00000020380
			ENSMUSG00000001741
			ENSMUSG00000021226
			ENSMUSG00000029469
			ENSMUSG00000020476
			ENSMUSG00000021215
			ENSMUSG00000028980
			ENSMUSG00000024505
			ENSMUSG00000024079
			ENSMUSG00000039470
			ENSMUSG00000036620
			ENSMUSG00000009376
			ENSMUSG00000016918
			ENSMUSG00000027513
			ENSMUSG00000024258
			ENSMUSG00000056492
			ENSMUSG00000028327
			ENSMUSG00000048442
			ENSMUSG00000022403
			ENSMUSG00000020598
			ENSMUSG00000028962
			ENSMUSG00000036242
			ENSMUSG00000063286
			ENSMUSG00000054555
			ENSMUSG00000020437
			ENSMUSG00000078517
			ENSMUSG00000081058
			ENSMUSG00000033970
			ENSMUSG00000015536
			ENSMUSG00000000957
			ENSMUSG00000027386
			ENSMUSG00000063146
			ENSMUSG00000031710
			ENSMUSG00000003420
			ENSMUSG00000030244
			ENSMUSG00000024063
			ENSMUSG00000026669
			ENSMUSG00000027331
			ENSMUSG00000027660
			ENSMUSG00000001143
			ENSMUSG00000052712
			ENSMUSG00000015749
			ENSMUSG00000035944
			ENSMUSG00000020534
			ENSMUSG00000052698
			ENSMUSG00000057666
			ENSMUSG00000020142
			ENSMUSG00000056962
			ENSMUSG00000052681
			ENSMUSG00000032561
			ENSMUSG00000055128
			ENSMUSG00000039740
			ENSMUSG00000030424
			ENSMUSG00000059248
			ENSMUSG00000028961
			ENSMUSG00000042447
			ENSMUSG00000091498
			ENSMUSG00000041695
			ENSMUSG00000034297
			ENSMUSG00000036585
			ENSMUSG00000068735
			ENSMUSG00000070709
			ENSMUSG00000097379
			ENSMUSG00000049878
			ENSMUSG00000028149
			ENSMUSG00000046223
			ENSMUSG00000005873
			ENSMUSG00000018774
			ENSMUSG00000025816
			ENSMUSG00000057789
			ENSMUSG00000040253
			ENSMUSG00000052192
			ENSMUSG00000043962
			ENSMUSG00000049672
			ENSMUSG00000020263
			ENSMUSG00000095788
			ENSMUSG00000034940
			ENSMUSG00000024924
			ENSMUSG00000037544
			ENSMUSG00000097451
			ENSMUSG00000032263
			ENSMUSG00000073617
			ENSMUSG00000048280
			ENSMUSG00000024985
			ENSMUSG00000001270
			ENSMUSG00000025154
			ENSMUSG00000030671
			ENSMUSG00000045038
			ENSMUSG00000029816
			ENSMUSG00000031951
			ENSMUSG00000037857
			ENSMUSG00000021190
			ENSMUSG00000026596
			ENSMUSG00000061615
			ENSMUSG00000038633
			ENSMUSG00000020354
			ENSMUSG00000040699
			ENSMUSG00000035459
			ENSMUSG00000033955
			ENSMUSG00000026657
			ENSMUSG00000028469
			ENSMUSG00000054612
			ENSMUSG00000032112
			ENSMUSG00000021182
			ENSMUSG00000089942
			ENSMUSG00000059901
			ENSMUSG00000050103
			ENSMUSG00000030754
			ENSMUSG00000004500
			ENSMUSG00000034300
			ENSMUSG00000052565
			ENSMUSG00000020580
			ENSMUSG00000059049
			ENSMUSG00000021115
			ENSMUSG00000044795
			ENSMUSG00000028104
			ENSMUSG00000023845
			ENSMUSG00000029038
			ENSMUSG00000061991
			ENSMUSG00000054793
			ENSMUSG00000027423
			ENSMUSG00000028184
			ENSMUSG00000073155
			ENSMUSG00000048677
			ENSMUSG00000098112
			ENSMUSG00000028701
			ENSMUSG00000073468
			ENSMUSG00000033222
			ENSMUSG00000011114
			ENSMUSG00000029701
			ENSMUSG00000018750
			ENSMUSG00000052798
			ENSMUSG00000008475
			ENSMUSG00000036086
			ENSMUSG00000021748
			ENSMUSG00000031075
			ENSMUSG00000028243
			ENSMUSG00000026991
			ENSMUSG00000082209
			ENSMUSG00000038578
			ENSMUSG00000082361
			ENSMUSG00000054520
			ENSMUSG00000032702
			ENSMUSG00000006585
			ENSMUSG00000022557
			ENSMUSG00000017774
			ENSMUSG00000022469
			ENSMUSG00000045210
			ENSMUSG00000092223
			ENSMUSG00000040263
			ENSMUSG00000026031
			ENSMUSG00000004815
			ENSMUSG00000004880
			ENSMUSG00000038244
			ENSMUSG00000049657
			ENSMUSG00000050855
			ENSMUSG00000029291
			ENSMUSG00000051212
			ENSMUSG00000006127
			ENSMUSG00000032311
			ENSMUSG00000082536
			ENSMUSG00000028369
			ENSMUSG00000064267
			ENSMUSG00000058135
			ENSMUSG00000097275
			ENSMUSG00000028581
			ENSMUSG00000001467
			ENSMUSG00000026604
			ENSMUSG00000038167
			ENSMUSG00000021428
			ENSMUSG00000059309
			ENSMUSG00000040711
			ENSMUSG00000040688
			ENSMUSG00000036073
			ENSMUSG00000003545
			ENSMUSG00000042066
			ENSMUSG00000019437
			ENSMUSG00000050335
			ENSMUSG00000044600
			ENSMUSG00000054469
			ENSMUSG00000032076
			ENSMUSG00000018293
			ENSMUSG00000036144
			ENSMUSG00000038967
			ENSMUSG00000068686
			ENSMUSG00000024668
			ENSMUSG00000033739
			ENSMUSG00000022234
			ENSMUSG00000024800
			ENSMUSG00000074677
			ENSMUSG00000032766
			ENSMUSG00000006369
			ENSMUSG00000010358
			ENSMUSG00000087691
			ENSMUSG00000031659
			ENSMUSG00000039449
			ENSMUSG00000032293
			ENSMUSG00000021710
			ENSMUSG00000049327
			ENSMUSG00000030298
			ENSMUSG00000048126
			ENSMUSG00000073563
			ENSMUSG00000051910
			ENSMUSG00000032827
			ENSMUSG00000026254
			ENSMUSG00000061619
			ENSMUSG00000038212
			ENSMUSG00000044405
			ENSMUSG00000034820
			ENSMUSG00000019966
			ENSMUSG00000026377
			ENSMUSG00000059588
			ENSMUSG00000032332
			ENSMUSG00000000317
			ENSMUSG00000032412
			ENSMUSG00000030421
			ENSMUSG00000092517
			ENSMUSG00000003810
			ENSMUSG00000046275
			ENSMUSG00000069270
			ENSMUSG00000036636
			ENSMUSG00000044060
			ENSMUSG00000006299
			ENSMUSG00000078945
			ENSMUSG00000028312
			ENSMUSG00000093812
			ENSMUSG00000074802
			ENSMUSG00000035790
			ENSMUSG00000029227
			ENSMUSG00000049037
			ENSMUSG00000023456
			ENSMUSG00000001829
			ENSMUSG00000022940
			ENSMUSG00000026662
			ENSMUSG00000026627
			ENSMUSG00000024098
			ENSMUSG00000006611
			ENSMUSG00000069267
			ENSMUSG00000002803
			ENSMUSG00000018770
			ENSMUSG00000032898
			ENSMUSG00000029823
			ENSMUSG00000025085
			ENSMUSG00000039607
			ENSMUSG00000087260
			ENSMUSG00000074657
			ENSMUSG00000020700
			ENSMUSG00000032413
			ENSMUSG00000018427
			ENSMUSG00000055737
			ENSMUSG00000033350
			ENSMUSG00000073792
			ENSMUSG00000041319
			ENSMUSG00000029050
			ENSMUSG00000042787
			ENSMUSG00000042249
			ENSMUSG00000026335
			ENSMUSG00000023031
			ENSMUSG00000011256
			ENSMUSG00000028300
			ENSMUSG00000022807
			ENSMUSG00000028565
			ENSMUSG00000023885
			ENSMUSG00000066571
			ENSMUSG00000018286
			ENSMUSG00000049600
			ENSMUSG00000030643
			ENSMUSG00000023960
			ENSMUSG00000042293
			ENSMUSG00000073771
			ENSMUSG00000073542
			ENSMUSG00000074743
			ENSMUSG00000040312
			ENSMUSG00000054277
			ENSMUSG00000021368
			ENSMUSG00000039050
			ENSMUSG00000055435
			ENSMUSG00000045629
			ENSMUSG00000031583
			ENSMUSG00000045094
			ENSMUSG00000028328
			ENSMUSG00000026393
			ENSMUSG00000018217
			ENSMUSG00000062257
			ENSMUSG00000052957
			ENSMUSG00000016495
			ENSMUSG00000026185
			ENSMUSG00000060961
			ENSMUSG00000003808
			ENSMUSG00000027750
			ENSMUSG00000015980
			ENSMUSG00000002332
			ENSMUSG00000007891
			ENSMUSG00000049241
			ENSMUSG00000015451
			ENSMUSG00000035376
			ENSMUSG00000022012
			ENSMUSG00000060950
			ENSMUSG00000021361
			ENSMUSG00000024302
			ENSMUSG00000014303
			ENSMUSG00000027288
			ENSMUSG00000053935
			ENSMUSG00000033075
			ENSMUSG00000038773
			ENSMUSG00000041794
			ENSMUSG00000053886
			ENSMUSG00000019850
			ENSMUSG00000008575
			ENSMUSG00000045624
			ENSMUSG00000050229
			ENSMUSG00000024191
			ENSMUSG00000027339
			ENSMUSG00000040613
			ENSMUSG00000028479
			ENSMUSG00000053985
			ENSMUSG00000030029
			ENSMUSG00000047888
			ENSMUSG00000029577
			ENSMUSG00000097903
			ENSMUSG00000016831
			ENSMUSG00000028383
			ENSMUSG00000035314
			ENSMUSG00000021508
			ENSMUSG00000029674
			ENSMUSG00000041328
			ENSMUSG00000020101
			ENSMUSG00000038119
			ENSMUSG00000039354
			ENSMUSG00000052928
			ENSMUSG00000013663
			ENSMUSG00000034158
			ENSMUSG00000029718
			ENSMUSG00000080316
			ENSMUSG00000038495
			ENSMUSG00000017291
			ENSMUSG00000038418
			ENSMUSG00000025743
			ENSMUSG00000022292
			ENSMUSG00000017119
			ENSMUSG00000055116
			ENSMUSG00000024271
			ENSMUSG00000017386
			ENSMUSG00000038663
			ENSMUSG00000001098
			ENSMUSG00000072825
			ENSMUSG00000014606
			ENSMUSG00000027656
			ENSMUSG00000021763
			ENSMUSG00000054484
			ENSMUSG00000030162
			ENSMUSG00000066687
			ENSMUSG00000020841
			ENSMUSG00000027242
			ENSMUSG00000046516
			ENSMUSG00000079491
			ENSMUSG00000020733
			ENSMUSG00000054814
			ENSMUSG00000034042
			ENSMUSG00000041482
			ENSMUSG00000078942
			ENSMUSG00000032826
			ENSMUSG00000020455
			ENSMUSG00000020085
			ENSMUSG00000004530
			ENSMUSG00000020897
			ENSMUSG00000033781
			ENSMUSG00000022665
			ENSMUSG00000011877
			ENSMUSG00000058979
			ENSMUSG00000029005
			ENSMUSG00000019923
			ENSMUSG00000008348
			ENSMUSG00000021846
			ENSMUSG00000021987
			ENSMUSG00000032018
			ENSMUSG00000035891
			ENSMUSG00000032899
			ENSMUSG00000064254
			ENSMUSG00000052539
			ENSMUSG00000091449
			ENSMUSG00000056771
			ENSMUSG00000029920
			ENSMUSG00000032641
			ENSMUSG00000006818
			ENSMUSG00000043923
			ENSMUSG00000029413
			ENSMUSG00000037239
			ENSMUSG00000054091
			ENSMUSG00000026641
			ENSMUSG00000032040
			ENSMUSG00000067288
			ENSMUSG00000030161
			ENSMUSG00000066568
			ENSMUSG00000025369
			ENSMUSG00000004698
			ENSMUSG00000091971
			ENSMUSG00000001062
			ENSMUSG00000026313
			ENSMUSG00000027326
			ENSMUSG00000012819
			ENSMUSG00000033557
			ENSMUSG00000020077
			ENSMUSG00000030208
			ENSMUSG00000023019
			ENSMUSG00000022707
			ENSMUSG00000022309
			ENSMUSG00000032013
			ENSMUSG00000031792
			ENSMUSG00000032497
			ENSMUSG00000039105
			ENSMUSG00000026360
			ENSMUSG00000070427
			ENSMUSG00000018697
			ENSMUSG00000021549
			ENSMUSG00000030720
			ENSMUSG00000028249
			ENSMUSG00000019889
			ENSMUSG00000038648
			ENSMUSG00000023348
			ENSMUSG00000038608
			ENSMUSG00000073643
			ENSMUSG00000044792
			ENSMUSG00000081534
			ENSMUSG00000022231
			ENSMUSG00000053040
			ENSMUSG00000073639
			ENSMUSG00000005087
			ENSMUSG00000085148
			ENSMUSG00000063870
			ENSMUSG00000069520
			ENSMUSG00000014329
			ENSMUSG00000031668
			ENSMUSG00000030187
			ENSMUSG00000097090
			ENSMUSG00000034343
			ENSMUSG00000005233
			ENSMUSG00000018428
			ENSMUSG00000009394
			ENSMUSG00000022371
			ENSMUSG00000032643
			ENSMUSG00000034653
			ENSMUSG00000039167
			ENSMUSG00000073418
			ENSMUSG00000046056
			ENSMUSG00000030830
			ENSMUSG00000042410
			ENSMUSG00000063229
			ENSMUSG00000032803
			ENSMUSG00000038187
			ENSMUSG00000004902
			ENSMUSG00000031924
			ENSMUSG00000092984
			ENSMUSG00000038178
			ENSMUSG00000004044
			ENSMUSG00000028207
			ENSMUSG00000073436
			ENSMUSG00000023267
			ENSMUSG00000045100
			ENSMUSG00000022537
			ENSMUSG00000040010
			ENSMUSG00000002963
			ENSMUSG00000042675
			ENSMUSG00000034673
			ENSMUSG00000029059
			ENSMUSG00000067722
			ENSMUSG00000041992
			ENSMUSG00000034525
			ENSMUSG00000050052
			ENSMUSG00000063450
			ENSMUSG00000073982
			ENSMUSG00000027671
			ENSMUSG00000042099
			ENSMUSG00000005371
			ENSMUSG00000027102
			ENSMUSG00000044548
			ENSMUSG00000029534
			ENSMUSG00000033991
			ENSMUSG00000016206
			ENSMUSG00000027394
			ENSMUSG00000045055
			ENSMUSG00000032122
			ENSMUSG00000059939
			ENSMUSG00000027222
			ENSMUSG00000023224
			ENSMUSG00000028556
			ENSMUSG00000053819
			ENSMUSG00000039166
			ENSMUSG00000020264
			ENSMUSG00000042962
			ENSMUSG00000030707
			ENSMUSG00000016756
			ENSMUSG00000005505
			ENSMUSG00000038848
			ENSMUSG00000021831
			ENSMUSG00000046694
			ENSMUSG00000019960
			ENSMUSG00000016024
			ENSMUSG00000024395
			ENSMUSG00000040907
			ENSMUSG00000032352
			ENSMUSG00000097290
			ENSMUSG00000046080
			ENSMUSG00000057396
			ENSMUSG00000021639
			ENSMUSG00000096910
			ENSMUSG00000032097
			ENSMUSG00000026659
			ENSMUSG00000029394
			ENSMUSG00000026623
			ENSMUSG00000051735
			ENSMUSG00000036863
			ENSMUSG00000044783
			ENSMUSG00000039529
			ENSMUSG00000004460
			ENSMUSG00000074030
			ENSMUSG00000027998
			ENSMUSG00000090145
			ENSMUSG00000026028
			ENSMUSG00000030846
			ENSMUSG00000067787
			ENSMUSG00000035356
			ENSMUSG00000075031
			ENSMUSG00000022265
			ENSMUSG00000009647
			ENSMUSG00000045658
			ENSMUSG00000025153
			ENSMUSG00000023723
			ENSMUSG00000002871
			ENSMUSG00000024677
			ENSMUSG00000074884
			ENSMUSG00000056124
			ENSMUSG00000010277
			ENSMUSG00000051978
			ENSMUSG00000025076
			ENSMUSG00000022391
			ENSMUSG00000014426
			ENSMUSG00000062980
			ENSMUSG00000024077
			ENSMUSG00000040250
			ENSMUSG00000029397
			ENSMUSG00000031928
			ENSMUSG00000020097
			ENSMUSG00000024240
			ENSMUSG00000059970
			ENSMUSG00000023994
			ENSMUSG00000043881
			ENSMUSG00000032698
			ENSMUSG00000043279
			ENSMUSG00000015947
			ENSMUSG00000006362
			ENSMUSG00000049709
			ENSMUSG00000032020
			ENSMUSG00000073374
			ENSMUSG00000032570
			ENSMUSG00000059273
			ENSMUSG00000028524
			ENSMUSG00000039512
			ENSMUSG00000087141
			ENSMUSG00000093930
			ENSMUSG00000036402
			ENSMUSG00000044258
			ENSMUSG00000043091
			ENSMUSG00000066842
			ENSMUSG00000086513
			ENSMUSG00000028101
			ENSMUSG00000037103
			ENSMUSG00000059810
			ENSMUSG00000006403
			ENSMUSG00000030779
			ENSMUSG00000090386
			ENSMUSG00000007041
			ENSMUSG00000024414
			ENSMUSG00000028532
			ENSMUSG00000037295
			ENSMUSG00000042826
			ENSMUSG00000041164
			ENSMUSG00000043259
			ENSMUSG00000024219
			ENSMUSG00000060509
			ENSMUSG00000063952
			ENSMUSG00000030263
			ENSMUSG00000021068
			ENSMUSG00000020105
			ENSMUSG00000028059
			ENSMUSG00000038024
			ENSMUSG00000071847
			ENSMUSG00000056069
			ENSMUSG00000064302
			ENSMUSG00000026305
			ENSMUSG00000001555
			ENSMUSG00000028692
			ENSMUSG00000024817
			ENSMUSG00000043284
			ENSMUSG00000024743
			ENSMUSG00000041762
			ENSMUSG00000045672
			ENSMUSG00000046841
			ENSMUSG00000022800
			ENSMUSG00000038217
			ENSMUSG00000044847
			ENSMUSG00000024404
			ENSMUSG00000076432
			ENSMUSG00000028633
			ENSMUSG00000032519
			ENSMUSG00000061740
			ENSMUSG00000020592
			ENSMUSG00000066000
			ENSMUSG00000042305
			ENSMUSG00000021589
			ENSMUSG00000038546
			ENSMUSG00000051469
			ENSMUSG00000023020
			ENSMUSG00000049539
			ENSMUSG00000028857
			ENSMUSG00000002731
			ENSMUSG00000041671
			ENSMUSG00000032126
			ENSMUSG00000041915
			ENSMUSG00000028851
			ENSMUSG00000029403
			ENSMUSG00000035759
			ENSMUSG00000021094
			ENSMUSG00000022386
			ENSMUSG00000059975
			ENSMUSG00000027187
			ENSMUSG00000020929
			ENSMUSG00000028848
			ENSMUSG00000020120
			ENSMUSG00000044894
			ENSMUSG00000054079
			ENSMUSG00000027070
			ENSMUSG00000029468
			ENSMUSG00000037847
			ENSMUSG00000027351
			ENSMUSG00000021840
			ENSMUSG00000040548
			ENSMUSG00000010660
			ENSMUSG00000032280
			ENSMUSG00000053838
			ENSMUSG00000018042
			ENSMUSG00000020532
			ENSMUSG00000028992
			ENSMUSG00000029569
			ENSMUSG00000078429
			ENSMUSG00000068134
			ENSMUSG00000078780
			ENSMUSG00000045838
			ENSMUSG00000030036
			ENSMUSG00000063524
			ENSMUSG00000019975
			ENSMUSG00000055884
			ENSMUSG00000020988
			ENSMUSG00000024300
			ENSMUSG00000031974
			ENSMUSG00000040356
			ENSMUSG00000024542
			ENSMUSG00000042190
			ENSMUSG00000073455
			ENSMUSG00000074656
			ENSMUSG00000028047
			ENSMUSG00000001524
			ENSMUSG00000024750
			ENSMUSG00000020814
			ENSMUSG00000023008
			ENSMUSG00000025931
			ENSMUSG00000034312
			ENSMUSG00000033629
			ENSMUSG00000061207
			ENSMUSG00000020130
			ENSMUSG00000060962
			ENSMUSG00000044017
			ENSMUSG00000027163
			ENSMUSG00000078622
			ENSMUSG00000024580
			ENSMUSG00000019302
			ENSMUSG00000020019
			ENSMUSG00000029649
			ENSMUSG00000068329
			ENSMUSG00000022443
			ENSMUSG00000033530
			ENSMUSG00000034573
			ENSMUSG00000043909
			ENSMUSG00000028108
			ENSMUSG00000020523
			ENSMUSG00000017737
			ENSMUSG00000026548
			ENSMUSG00000029009
			ENSMUSG00000036986
			ENSMUSG00000029254
			ENSMUSG00000036943
			ENSMUSG00000020282
			ENSMUSG00000025314
			ENSMUSG00000002031
			ENSMUSG00000032850
			ENSMUSG00000026380
			ENSMUSG00000067430
			ENSMUSG00000040746
			ENSMUSG00000029203
			ENSMUSG00000008540
			ENSMUSG00000026674
			ENSMUSG00000086825
			ENSMUSG00000002728
			ENSMUSG00000021427
			ENSMUSG00000090399
			ENSMUSG00000057963
			ENSMUSG00000070031
			ENSMUSG00000051669
			ENSMUSG00000020876
			ENSMUSG00000024781
			ENSMUSG00000042419
			ENSMUSG00000006262
			ENSMUSG00000021765
			ENSMUSG00000043257
			ENSMUSG00000053398
			ENSMUSG00000024357
			ENSMUSG00000049538
			ENSMUSG00000042251
			ENSMUSG00000029108
			ENSMUSG00000031447
			ENSMUSG00000002741
			ENSMUSG00000023921
			ENSMUSG00000039879
			ENSMUSG00000061175
			ENSMUSG00000045455
			ENSMUSG00000030452
			ENSMUSG00000002870
			ENSMUSG00000022999
			ENSMUSG00000000278
			ENSMUSG00000047793
			ENSMUSG00000034620
			ENSMUSG00000041936
			ENSMUSG00000051864
			ENSMUSG00000047945
			ENSMUSG00000004207
			ENSMUSG00000022255
			ENSMUSG00000046561
			ENSMUSG00000019158
			ENSMUSG00000022623
			ENSMUSG00000015474
			ENSMUSG00000052760
			ENSMUSG00000037824
			ENSMUSG00000024065
			ENSMUSG00000001123
			ENSMUSG00000037411
			ENSMUSG00000062524
			ENSMUSG00000049323
			ENSMUSG00000095687
			ENSMUSG00000030188
			ENSMUSG00000037957
			ENSMUSG00000037601
			ENSMUSG00000006941
			ENSMUSG00000000168
			ENSMUSG00000001518
			ENSMUSG00000028476
			ENSMUSG00000071302
			ENSMUSG00000074867
			ENSMUSG00000032459
			ENSMUSG00000038544
			ENSMUSG00000020877
			ENSMUSG00000074918
			ENSMUSG00000020409
			ENSMUSG00000090150
			ENSMUSG00000018076
			ENSMUSG00000032410
			ENSMUSG00000024312
			ENSMUSG00000033773
			ENSMUSG00000079507
			ENSMUSG00000030612
			ENSMUSG00000032718
			ENSMUSG00000092035
			ENSMUSG00000021051
			ENSMUSG00000049791
			ENSMUSG00000048249
			ENSMUSG00000080917
			ENSMUSG00000044197
			ENSMUSG00000017376
			ENSMUSG00000028779
			ENSMUSG00000017176
			ENSMUSG00000075701
			ENSMUSG00000092417
			ENSMUSG00000020015
			ENSMUSG00000034729
			ENSMUSG00000037259
			ENSMUSG00000042203
			ENSMUSG00000028899
			ENSMUSG00000020154
			ENSMUSG00000040584
			ENSMUSG00000021147
			ENSMUSG00000022540
			ENSMUSG00000056116
			ENSMUSG00000031691
			ENSMUSG00000031979
			ENSMUSG00000055485
			ENSMUSG00000040596
			ENSMUSG00000018474
			ENSMUSG00000079227
			ENSMUSG00000022365
			ENSMUSG00000063480
			ENSMUSG00000027746
			ENSMUSG00000037235
			ENSMUSG00000020189
			ENSMUSG00000020044
			ENSMUSG00000070867
			ENSMUSG00000061315
			ENSMUSG00000040481
			ENSMUSG00000070436
			ENSMUSG00000044338
			ENSMUSG00000036427
			ENSMUSG00000054434
			ENSMUSG00000022018
			ENSMUSG00000030536
			ENSMUSG00000019899
			ENSMUSG00000022285
			ENSMUSG00000090641
			ENSMUSG00000021069
			ENSMUSG00000086688
			ENSMUSG00000057497
			ENSMUSG00000017692
			ENSMUSG00000022558
			ENSMUSG00000025911
			ENSMUSG00000037098
			ENSMUSG00000024921
			ENSMUSG00000071856
			ENSMUSG00000069769
			ENSMUSG00000028649
			ENSMUSG00000069833
			ENSMUSG00000025885
			ENSMUSG00000027313
			ENSMUSG00000060477
			ENSMUSG00000018906
			ENSMUSG00000037242
			ENSMUSG00000021136
			ENSMUSG00000034936
			ENSMUSG00000026436
			ENSMUSG00000032743
			ENSMUSG00000063316
			ENSMUSG00000021322
			ENSMUSG00000069273
			ENSMUSG00000081833
			ENSMUSG00000029725
			ENSMUSG00000046312
			ENSMUSG00000030788
			ENSMUSG00000036528
			ENSMUSG00000022452
			ENSMUSG00000031740
			ENSMUSG00000081189
			ENSMUSG00000086679
			ENSMUSG00000000530
			ENSMUSG00000020009
			ENSMUSG00000033576
			ENSMUSG00000024043
			ENSMUSG00000047603
			ENSMUSG00000034473
			ENSMUSG00000037337
			ENSMUSG00000027408
			ENSMUSG00000059474
			ENSMUSG00000032252
			ENSMUSG00000040234
			ENSMUSG00000019718
			ENSMUSG00000021621
			ENSMUSG00000021646
			ENSMUSG00000022770
			ENSMUSG00000051041
			ENSMUSG00000073968
			ENSMUSG00000005803
			ENSMUSG00000026187
			ENSMUSG00000032615
			ENSMUSG00000025969
			ENSMUSG00000012429
			ENSMUSG00000036560
			ENSMUSG00000051236
			ENSMUSG00000036435
			ENSMUSG00000024672
			ENSMUSG00000027882
			ENSMUSG00000028412
			ENSMUSG00000028790
			ENSMUSG00000038080
			ENSMUSG00000026869
			ENSMUSG00000032492
			ENSMUSG00000049516
			ENSMUSG00000023828
			ENSMUSG00000027533
			ENSMUSG00000002308
			ENSMUSG00000025784
			ENSMUSG00000030577
			ENSMUSG00000032374
			ENSMUSG00000032135
			ENSMUSG00000034575
			ENSMUSG00000055980
			ENSMUSG00000037531
			ENSMUSG00000033793
			ENSMUSG00000070372
			ENSMUSG00000055835
			ENSMUSG00000019947
			ENSMUSG00000031787
			ENSMUSG00000028007
			ENSMUSG00000019977
			ENSMUSG00000093077
			ENSMUSG00000022556
			ENSMUSG00000046230
			ENSMUSG00000001794
			ENSMUSG00000024218
			ENSMUSG00000042772
			ENSMUSG00000047388
			ENSMUSG00000038422
			ENSMUSG00000073684
			ENSMUSG00000006463
			ENSMUSG00000030423
			ENSMUSG00000025358
			ENSMUSG00000038028
			ENSMUSG00000002885
			ENSMUSG00000041642
			ENSMUSG00000024513
			ENSMUSG00000039735
			ENSMUSG00000035799
			ENSMUSG00000022941
			ENSMUSG00000027425
			ENSMUSG00000038545
			ENSMUSG00000050587
			ENSMUSG00000049932
			ENSMUSG00000021371
			ENSMUSG00000022969
			ENSMUSG00000000154
			ENSMUSG00000022967
			ENSMUSG00000038375
			ENSMUSG00000029913
			ENSMUSG00000000804
			ENSMUSG00000026709
			ENSMUSG00000030086
			ENSMUSG00000092460
			ENSMUSG00000060038
			ENSMUSG00000026196
			ENSMUSG00000031486
			ENSMUSG00000079588
			ENSMUSG00000036686
			ENSMUSG00000033943
			ENSMUSG00000086784
			ENSMUSG00000001065
			ENSMUSG00000007777
			ENSMUSG00000045382
			ENSMUSG00000070348
			ENSMUSG00000031078
			ENSMUSG00000038299
			ENSMUSG00000070934
			ENSMUSG00000071604
			ENSMUSG00000038521
			ENSMUSG00000033364
			ENSMUSG00000032673
			ENSMUSG00000021079
			ENSMUSG00000041645
			ENSMUSG00000015134
			ENSMUSG00000019194
			ENSMUSG00000040462
			ENSMUSG00000018920
			ENSMUSG00000087150
			ENSMUSG00000042406
			ENSMUSG00000018654
			ENSMUSG00000027206
			ENSMUSG00000033902
			ENSMUSG00000037321
			ENSMUSG00000039196
			ENSMUSG00000014077
			ENSMUSG00000033379
			ENSMUSG00000000915
			ENSMUSG00000033715
			ENSMUSG00000030168
			ENSMUSG00000011254
			ENSMUSG00000003549
			ENSMUSG00000026131
			ENSMUSG00000032265
			ENSMUSG00000056602
			ENSMUSG00000028419
			ENSMUSG00000020205
			ENSMUSG00000020776
			ENSMUSG00000031442
			ENSMUSG00000089682
			ENSMUSG00000023832
			ENSMUSG00000034518
			ENSMUSG00000020652
			ENSMUSG00000020777
			ENSMUSG00000032409
			ENSMUSG00000044768
			ENSMUSG00000092203
			ENSMUSG00000039599
			ENSMUSG00000041130
			ENSMUSG00000021550
			ENSMUSG00000027180
			ENSMUSG00000052593
			ENSMUSG00000041939
			ENSMUSG00000032875
			ENSMUSG00000034024
			ENSMUSG00000029482
			ENSMUSG00000047330
			ENSMUSG00000032089
			ENSMUSG00000085741
			ENSMUSG00000027737
			ENSMUSG00000006057
			ENSMUSG00000023170
			ENSMUSG00000027843
			ENSMUSG00000026600
			ENSMUSG00000038563
			ENSMUSG00000033819
			ENSMUSG00000053965
			ENSMUSG00000066043
			ENSMUSG00000029658
			ENSMUSG00000027198
			ENSMUSG00000061544
			ENSMUSG00000019505
			ENSMUSG00000021003
			ENSMUSG00000074604
			ENSMUSG00000038400
			ENSMUSG00000092341
			ENSMUSG00000061482
			ENSMUSG00000000489
			ENSMUSG00000060981
			ENSMUSG00000030148
			ENSMUSG00000059586
			ENSMUSG00000029175
			ENSMUSG00000024299
			ENSMUSG00000047497
			ENSMUSG00000092837
			ENSMUSG00000053929
			ENSMUSG00000036737
			ENSMUSG00000085037
			ENSMUSG00000031458
			ENSMUSG00000022427
			ENSMUSG00000035305
			ENSMUSG00000062729
			ENSMUSG00000070780
			ENSMUSG00000030811
			ENSMUSG00000057637
			ENSMUSG00000073565
			ENSMUSG00000078190
			ENSMUSG00000059878
			ENSMUSG00000097352
			ENSMUSG00000024014
			ENSMUSG00000056418
			ENSMUSG00000006014
			ENSMUSG00000024068
			ENSMUSG00000062381
			ENSMUSG00000003955
			ENSMUSG00000068335
			ENSMUSG00000024862
			ENSMUSG00000040648
			ENSMUSG00000096975
			ENSMUSG00000025352
			ENSMUSG00000020740
			ENSMUSG00000021709
			ENSMUSG00000021028
			ENSMUSG00000049881
			ENSMUSG00000060679
			ENSMUSG00000025366
			ENSMUSG00000027677
			ENSMUSG00000021192
			ENSMUSG00000031613
			ENSMUSG00000066245
			ENSMUSG00000043019
			ENSMUSG00000034422
			ENSMUSG00000030123
			ENSMUSG00000061028
			ENSMUSG00000049755
			ENSMUSG00000040550
			ENSMUSG00000020850
			ENSMUSG00000021072
			ENSMUSG00000073838
			ENSMUSG00000024190
			ENSMUSG00000027803
			ENSMUSG00000030660
			ENSMUSG00000024515
			ENSMUSG00000038383
			ENSMUSG00000010608
			ENSMUSG00000029385
			ENSMUSG00000021474
			ENSMUSG00000010290
			ENSMUSG00000028896
			ENSMUSG00000005057
			ENSMUSG00000028125
			ENSMUSG00000030127
			ENSMUSG00000055239
			ENSMUSG00000069874
			ENSMUSG00000040859
			ENSMUSG00000053581
			ENSMUSG00000006519
			ENSMUSG00000061410
			ENSMUSG00000027792
			ENSMUSG00000026289
			ENSMUSG00000043051
			ENSMUSG00000020865
			ENSMUSG00000028413
			ENSMUSG00000003134
			ENSMUSG00000004952
			ENSMUSG00000054619
			ENSMUSG00000007029
			ENSMUSG00000020658
			ENSMUSG00000030353
			ENSMUSG00000032911
			ENSMUSG00000060216
			ENSMUSG00000024691
			ENSMUSG00000022742
			ENSMUSG00000031712
			ENSMUSG00000018405
			ENSMUSG00000020087
			ENSMUSG00000025453
			ENSMUSG00000032231
			ENSMUSG00000056220
			ENSMUSG00000004947
			ENSMUSG00000040918
			ENSMUSG00000055254
			ENSMUSG00000022757
			ENSMUSG00000046814
			ENSMUSG00000079462
			ENSMUSG00000073940
			ENSMUSG00000029066
			ENSMUSG00000026437
			ENSMUSG00000002222
			ENSMUSG00000020604
			ENSMUSG00000060739
			ENSMUSG00000006390
			ENSMUSG00000047534
			ENSMUSG00000015126
			ENSMUSG00000040345
			ENSMUSG00000015143
			ENSMUSG00000061086
			ENSMUSG00000020520
			ENSMUSG00000027751
			ENSMUSG00000037894
			ENSMUSG00000021423
			ENSMUSG00000037029
			ENSMUSG00000041958
			ENSMUSG00000059713
			ENSMUSG00000015932
			ENSMUSG00000038930
			ENSMUSG00000022803
			ENSMUSG00000051234
			ENSMUSG00000019188
			ENSMUSG00000027508
			ENSMUSG00000027306
			ENSMUSG00000032396
			ENSMUSG00000047676
			ENSMUSG00000022962
			ENSMUSG00000027552
			ENSMUSG00000037370
			ENSMUSG00000040322
			ENSMUSG00000069835
			ENSMUSG00000068917
			ENSMUSG00000045005
			ENSMUSG00000074305
			ENSMUSG00000026248
			ENSMUSG00000032120
			ENSMUSG00000022124
			ENSMUSG00000066113
			ENSMUSG00000038127
			ENSMUSG00000027293
			ENSMUSG00000062232
			ENSMUSG00000091586
			ENSMUSG00000037940
			ENSMUSG00000021814
			ENSMUSG00000004473
			ENSMUSG00000060678
			ENSMUSG00000007827
			ENSMUSG00000063430
			ENSMUSG00000030341
			ENSMUSG00000020671
			ENSMUSG00000035152
			ENSMUSG00000028792
			ENSMUSG00000025374
			ENSMUSG00000047832
			ENSMUSG00000040848
			ENSMUSG00000061130
			ENSMUSG00000040723
			ENSMUSG00000007880
			ENSMUSG00000030056
			ENSMUSG00000032307
			ENSMUSG00000030055
			ENSMUSG00000021097
			ENSMUSG00000038888
			ENSMUSG00000029833
			ENSMUSG00000020549
			ENSMUSG00000053333
			ENSMUSG00000039568
			ENSMUSG00000006281
			ENSMUSG00000079109
			ENSMUSG00000051483
			ENSMUSG00000036138
			ENSMUSG00000039789
			ENSMUSG00000025404
			ENSMUSG00000000340
			ENSMUSG00000001751
			ENSMUSG00000021326
			ENSMUSG00000078584
			ENSMUSG00000062554
			ENSMUSG00000033373
			ENSMUSG00000047710
			ENSMUSG00000022364
			ENSMUSG00000029228
			ENSMUSG00000025086
			ENSMUSG00000074890
			ENSMUSG00000028309
			ENSMUSG00000021614
			ENSMUSG00000039108
			ENSMUSG00000024601
			ENSMUSG00000024816
			ENSMUSG00000048578
			ENSMUSG00000047747
			ENSMUSG00000024247
			ENSMUSG00000058392
			ENSMUSG00000053158
			ENSMUSG00000035279
			ENSMUSG00000026535
			ENSMUSG00000034681
			ENSMUSG00000030516
			ENSMUSG00000052146
			ENSMUSG00000026357
			ENSMUSG00000029591
			ENSMUSG00000019971
			ENSMUSG00000023809
			ENSMUSG00000031703
			ENSMUSG00000074649
			ENSMUSG00000027642
			ENSMUSG00000060636
			ENSMUSG00000030166
			ENSMUSG00000053964
			ENSMUSG00000042389
			ENSMUSG00000020810
			ENSMUSG00000061079
			ENSMUSG00000043833
			ENSMUSG00000050965
			ENSMUSG00000033767
			ENSMUSG00000064225
			ENSMUSG00000067847
			ENSMUSG00000020898
			ENSMUSG00000032078
			ENSMUSG00000021572
			ENSMUSG00000032301
			ENSMUSG00000032359
			ENSMUSG00000040033
			ENSMUSG00000005198
			ENSMUSG00000039159
			ENSMUSG00000022901
			ENSMUSG00000044646
			ENSMUSG00000027176
			ENSMUSG00000036295
			ENSMUSG00000034926
			ENSMUSG00000022749
			ENSMUSG00000020063
			ENSMUSG00000036067
			ENSMUSG00000020521
			ENSMUSG00000051285
			ENSMUSG00000024713
			ENSMUSG00000040152
			ENSMUSG00000018931
			ENSMUSG00000039953
			ENSMUSG00000001334
			ENSMUSG00000031841
			ENSMUSG00000028760
			ENSMUSG00000030315
			ENSMUSG00000054150
			ENSMUSG00000053279
			ENSMUSG00000030279
			ENSMUSG00000041870
			ENSMUSG00000017405
			ENSMUSG00000033253
			ENSMUSG00000020473
			ENSMUSG00000022546
			ENSMUSG00000028458
			ENSMUSG00000033863
			ENSMUSG00000059552
			ENSMUSG00000027506
			ENSMUSG00000037852
			ENSMUSG00000021514
			ENSMUSG00000020869
			ENSMUSG00000026705
			ENSMUSG00000009687
			ENSMUSG00000025078
			ENSMUSG00000031090
			ENSMUSG00000039943
			ENSMUSG00000023992
			ENSMUSG00000048537
			ENSMUSG00000020894
			ENSMUSG00000026536
			ENSMUSG00000060467
			ENSMUSG00000035878
			ENSMUSG00000081723
			ENSMUSG00000097908
			ENSMUSG00000031788
			ENSMUSG00000023025
			ENSMUSG00000026896
			ENSMUSG00000014444
			ENSMUSG00000006589
			ENSMUSG00000036775
			ENSMUSG00000019539
			ENSMUSG00000034032
			ENSMUSG00000021792
			ENSMUSG00000031701
			ENSMUSG00000049907
			ENSMUSG00000036568
			ENSMUSG00000040359
			ENSMUSG00000025466
			ENSMUSG00000047719
			ENSMUSG00000061650
			ENSMUSG00000033488
			ENSMUSG00000021134
			ENSMUSG00000001248
			ENSMUSG00000028576
			ENSMUSG00000047187
			ENSMUSG00000057113
			ENSMUSG00000043398
			ENSMUSG00000035769
			ENSMUSG00000069268
			ENSMUSG00000062588
			ENSMUSG00000094026
			ENSMUSG00000023951
			ENSMUSG00000019738
			ENSMUSG00000027575
			ENSMUSG00000074417
			ENSMUSG00000024096
			ENSMUSG00000040822
			ENSMUSG00000037434
			ENSMUSG00000053062
			ENSMUSG00000031790
			ENSMUSG00000074272
			ENSMUSG00000042613
			ENSMUSG00000060073
			ENSMUSG00000053580
			ENSMUSG00000006442
			ENSMUSG00000026656
			ENSMUSG00000041303
			ENSMUSG00000063171
			ENSMUSG00000016356
			ENSMUSG00000028085
			ENSMUSG00000041390
			ENSMUSG00000048930
			ENSMUSG00000027236
			ENSMUSG00000042349
			ENSMUSG00000023942
			ENSMUSG00000042363
			ENSMUSG00000024413
			ENSMUSG00000051256
			ENSMUSG00000031976
			ENSMUSG00000049577
			ENSMUSG00000050043
			ENSMUSG00000028860
			ENSMUSG00000043587
			ENSMUSG00000022340
			ENSMUSG00000025024
			ENSMUSG00000027166
			ENSMUSG00000031996
			ENSMUSG00000018583
			ENSMUSG00000026309
			ENSMUSG00000027304
			ENSMUSG00000034656
			ENSMUSG00000066151
			ENSMUSG00000027002
			ENSMUSG00000021047
			ENSMUSG00000024217
			ENSMUSG00000028530
			ENSMUSG00000022899
			ENSMUSG00000006931
			ENSMUSG00000020687
			ENSMUSG00000016128
			ENSMUSG00000041241
			ENSMUSG00000043190
			ENSMUSG00000040565
			ENSMUSG00000022521
			ENSMUSG00000003814
			ENSMUSG00000035007
			ENSMUSG00000070953
			ENSMUSG00000054728
			ENSMUSG00000003123
			ENSMUSG00000039804
			ENSMUSG00000001383
			ENSMUSG00000004446
			ENSMUSG00000021223
			ENSMUSG00000042743
			ENSMUSG00000029070
			ENSMUSG00000007837
			ENSMUSG00000079523
			ENSMUSG00000058298
			ENSMUSG00000059796
			ENSMUSG00000033540
			ENSMUSG00000044749
			ENSMUSG00000069206
			ENSMUSG00000035671
			ENSMUSG00000069743
			ENSMUSG00000040751
			ENSMUSG00000072704
			ENSMUSG00000074794
			ENSMUSG00000028772
			ENSMUSG00000049690
			ENSMUSG00000028926
			ENSMUSG00000029552
			ENSMUSG00000029427
			ENSMUSG00000035401
			ENSMUSG00000009207
			ENSMUSG00000068923
			ENSMUSG00000038600
			ENSMUSG00000030704
			ENSMUSG00000073437
			ENSMUSG00000046756
			ENSMUSG00000008398
			ENSMUSG00000040552
			ENSMUSG00000020828
			ENSMUSG00000079277
			ENSMUSG00000022472
			ENSMUSG00000083289
			ENSMUSG00000005469
			ENSMUSG00000036078
			ENSMUSG00000021338
			ENSMUSG00000027091
			ENSMUSG00000030990
			ENSMUSG00000026103
			ENSMUSG00000024789
			ENSMUSG00000024446
			ENSMUSG00000023980
			ENSMUSG00000023087
			ENSMUSG00000079003
			ENSMUSG00000020644
			ENSMUSG00000078139
			ENSMUSG00000051730
			ENSMUSG00000039646
			ENSMUSG00000027499
			ENSMUSG00000020949
			ENSMUSG00000058239
			ENSMUSG00000066037
			ENSMUSG00000041355
			ENSMUSG00000041453
			ENSMUSG00000027852
			ENSMUSG00000027940
			ENSMUSG00000052560
			ENSMUSG00000024516
			ENSMUSG00000015247
			ENSMUSG00000079215
			ENSMUSG00000030147
			ENSMUSG00000062373
			ENSMUSG00000032741
			ENSMUSG00000063888
			ENSMUSG00000028159
			ENSMUSG00000032407
			ENSMUSG00000024795
			ENSMUSG00000006800
			ENSMUSG00000033983
			ENSMUSG00000033705
			ENSMUSG00000003949
			ENSMUSG00000066415
			ENSMUSG00000027797
			ENSMUSG00000056305
			ENSMUSG00000041343
			ENSMUSG00000018845
			ENSMUSG00000023169
			ENSMUSG00000027782
			ENSMUSG00000045664
			ENSMUSG00000006307
			ENSMUSG00000022836
			ENSMUSG00000029135
			ENSMUSG00000022105
			ENSMUSG00000049676
			ENSMUSG00000024754
			ENSMUSG00000070720
			ENSMUSG00000049687
			ENSMUSG00000057572
			ENSMUSG00000018476
			ENSMUSG00000028156
			ENSMUSG00000035469
			ENSMUSG00000039835
			ENSMUSG00000026615
			ENSMUSG00000067336
			ENSMUSG00000052013
			ENSMUSG00000032232
			ENSMUSG00000038866
			ENSMUSG00000030272
			ENSMUSG00000072692
			ENSMUSG00000002458
			ENSMUSG00000022629
			ENSMUSG00000029535
			ENSMUSG00000011257
			ENSMUSG00000009828
			ENSMUSG00000024132
			ENSMUSG00000030149
			ENSMUSG00000026664
			ENSMUSG00000035798
			ENSMUSG00000097330
			ENSMUSG00000047804
			ENSMUSG00000036820
			ENSMUSG00000032115
			ENSMUSG00000024897
			ENSMUSG00000033735
			ENSMUSG00000024725
			ENSMUSG00000027490
			ENSMUSG00000034413
			ENSMUSG00000085519
			ENSMUSG00000036197
			ENSMUSG00000026307
			ENSMUSG00000054942
			ENSMUSG00000024308
			ENSMUSG00000025474
			ENSMUSG00000041415
			ENSMUSG00000023286
			ENSMUSG00000021596
			ENSMUSG00000028291
			ENSMUSG00000046562
			ENSMUSG00000048109
			ENSMUSG00000032411
			ENSMUSG00000055632
			ENSMUSG00000020528
			ENSMUSG00000033961
			ENSMUSG00000018209
			ENSMUSG00000015944
			ENSMUSG00000049576
			ENSMUSG00000021518
			ENSMUSG00000020319
			ENSMUSG00000059439
			ENSMUSG00000055817
			ENSMUSG00000022000
			ENSMUSG00000030847
			ENSMUSG00000041000
			ENSMUSG00000028494
			ENSMUSG00000017801
			ENSMUSG00000040433
			ENSMUSG00000024030
			ENSMUSG00000042476
			ENSMUSG00000049532
			ENSMUSG00000016757
			ENSMUSG00000018740
			ENSMUSG00000015461
			ENSMUSG00000036864
			ENSMUSG00000024529
			ENSMUSG00000074405
			ENSMUSG00000052914
			ENSMUSG00000076435
			ENSMUSG00000024592
			ENSMUSG00000031661
			ENSMUSG00000050796
			ENSMUSG00000041846
			ENSMUSG00000026820
			ENSMUSG00000035367
			ENSMUSG00000027661
			ENSMUSG00000022280
			ENSMUSG00000019362
			ENSMUSG00000025245
			ENSMUSG00000020412
			ENSMUSG00000022426
			ENSMUSG00000032462
			ENSMUSG00000029992
			ENSMUSG00000028687
			ENSMUSG00000018363
			ENSMUSG00000089847
			ENSMUSG00000022401
			ENSMUSG00000038072
			ENSMUSG00000050017
			ENSMUSG00000020423
			ENSMUSG00000032456
			ENSMUSG00000026577
			ENSMUSG00000070871
			ENSMUSG00000015305
			ENSMUSG00000021033
			ENSMUSG00000056121
			ENSMUSG00000072915
			ENSMUSG00000020755
			ENSMUSG00000068855
			ENSMUSG00000022516
			ENSMUSG00000033327
			ENSMUSG00000018965
			ENSMUSG00000020098
			ENSMUSG00000022898
			ENSMUSG00000004069
			ENSMUSG00000055204
			ENSMUSG00000079429
			ENSMUSG00000021113
			ENSMUSG00000025102
			ENSMUSG00000023110
			ENSMUSG00000001995
			ENSMUSG00000041740
			ENSMUSG00000011096
			ENSMUSG00000079179
			ENSMUSG00000021767
			ENSMUSG00000027984
			ENSMUSG00000028028
			ENSMUSG00000044807
			ENSMUSG00000028514
			ENSMUSG00000020109
			ENSMUSG00000040488
			ENSMUSG00000020778
			ENSMUSG00000024193
			ENSMUSG00000047867
			ENSMUSG00000015653
			ENSMUSG00000067212
			ENSMUSG00000038181
			ENSMUSG00000028269
			ENSMUSG00000091512
			ENSMUSG00000024290
			ENSMUSG00000054675
			ENSMUSG00000057842
			ENSMUSG00000021048
			ENSMUSG00000027424
			ENSMUSG00000021725
			ENSMUSG00000046721
			ENSMUSG00000017309
			ENSMUSG00000027284
			ENSMUSG00000022205
			ENSMUSG00000033849
			ENSMUSG00000028967
			ENSMUSG00000026839
			ENSMUSG00000034120
			ENSMUSG00000054428
			ENSMUSG00000044066
			ENSMUSG00000028495
			ENSMUSG00000019464
			ENSMUSG00000039810
			ENSMUSG00000055024
			ENSMUSG00000027009
			ENSMUSG00000037416
			ENSMUSG00000022372
			ENSMUSG00000018287
			ENSMUSG00000021108
			ENSMUSG00000034334
			ENSMUSG00000020440
			ENSMUSG00000026365
			ENSMUSG00000020901
			ENSMUSG00000049606
			ENSMUSG00000040283
			ENSMUSG00000038156
			ENSMUSG00000026864
			ENSMUSG00000040084
			ENSMUSG00000020029
			ENSMUSG00000005802
			ENSMUSG00000037731
			ENSMUSG00000028484
			ENSMUSG00000039349
			ENSMUSG00000022708
			ENSMUSG00000038143
			ENSMUSG00000025510
			ENSMUSG00000029726
			ENSMUSG00000027947
			ENSMUSG00000031441
			ENSMUSG00000063802
			ENSMUSG00000082953
			ENSMUSG00000020692
			ENSMUSG00000035173
			ENSMUSG00000036545
			ENSMUSG00000026630
			ENSMUSG00000083844
			ENSMUSG00000061062
			ENSMUSG00000058230
			ENSMUSG00000071757
			ENSMUSG00000033623
			ENSMUSG00000028337
			ENSMUSG00000073412
			ENSMUSG00000013089
			ENSMUSG00000043505
			ENSMUSG00000018672
			ENSMUSG00000019132
			ENSMUSG00000052062
			ENSMUSG00000056050
			ENSMUSG00000035863
			ENSMUSG00000026698
			ENSMUSG00000026000
			ENSMUSG00000028795
			ENSMUSG00000027111
			ENSMUSG00000025810
			ENSMUSG00000037573
			ENSMUSG00000040181
			ENSMUSG00000061665
			ENSMUSG00000022892
			ENSMUSG00000029392
			ENSMUSG00000015488
			ENSMUSG00000036046
			ENSMUSG00000007411
			ENSMUSG00000052632
			ENSMUSG00000063873
			ENSMUSG00000030894
			ENSMUSG00000009281
			ENSMUSG00000021260
			ENSMUSG00000024778
			ENSMUSG00000072623
			ENSMUSG00000005973
			ENSMUSG00000033323
			ENSMUSG00000039308
			ENSMUSG00000023972
			ENSMUSG00000082519
			ENSMUSG00000024608
			ENSMUSG00000000318
			ENSMUSG00000034235
			ENSMUSG00000028497
			ENSMUSG00000027004
			ENSMUSG00000045039
			ENSMUSG00000027752
			ENSMUSG00000031446
			ENSMUSG00000048799
			ENSMUSG00000041040
			ENSMUSG00000033430
			ENSMUSG00000028995
			ENSMUSG00000041891
			ENSMUSG00000048490
			ENSMUSG00000027395
			ENSMUSG00000036158
[truncated: 3,482 more rows]
