# Supplementary material for: Parent-of-origin effects propagate through networks to shape metabolic traits
Source: bioRxiv preprint, doi:10.1101/2021.08.10.455860, version 1 (2021-08-11)
Supplement: Supplemental Table 11 [file 455860_file13.xlsx]

## Sheet: GeneNameToEnsembl
	Ensembl ID	Gene Name Used
	ENSMUSG00000000001	Gnai3
	ENSMUSG00000000028	Cdc45
	ENSMUSG00000000031	H19
	ENSMUSG00000000049	Apoh
	ENSMUSG00000000056	Narf
	ENSMUSG00000000058	Cav2
	ENSMUSG00000000078	Klf6
	ENSMUSG00000000085	Scmh1
	ENSMUSG00000000088	Cox5a
	ENSMUSG00000000093	Tbx2
	ENSMUSG00000000094	Tbx4
	ENSMUSG00000000120	Ngfr
	ENSMUSG00000000125	Wnt3
	ENSMUSG00000000126	Wnt9a
	ENSMUSG00000000127	Fer
	ENSMUSG00000000131	Xpo6
	ENSMUSG00000000142	Axin2
	ENSMUSG00000000148	Brat1
	ENSMUSG00000000149	Gna12
	ENSMUSG00000000154	Slc22a18
	ENSMUSG00000000157	Itgb2l
	ENSMUSG00000000159	Igsf5
	ENSMUSG00000000167	Pih1d2
	ENSMUSG00000000168	Dlat
	ENSMUSG00000000171	Sdhd
	ENSMUSG00000000182	Fgf23
	ENSMUSG00000000183	Fgf6
	ENSMUSG00000000184	Ccnd2
	ENSMUSG00000000194	Gpr107
	ENSMUSG00000000197	Nalcn
	ENSMUSG00000000202	Btbd17
	ENSMUSG00000000204	Slfn4
	ENSMUSG00000000214	Th
	ENSMUSG00000000215	Ins2
	ENSMUSG00000000216	Scnn1g
	ENSMUSG00000000244	Tspan32
	ENSMUSG00000000247	Lhx2
	ENSMUSG00000000248	Clec2g
	ENSMUSG00000000253	Gmpr
	ENSMUSG00000000263	Glra1
	ENSMUSG00000000275	Trim25
	ENSMUSG00000000276	Dgke
	ENSMUSG00000000278	Scpep1
	ENSMUSG00000000282	Mnt
	ENSMUSG00000000290	Itgb2
	ENSMUSG00000000295	Hddc2
	ENSMUSG00000000296	Tpd52l1
	ENSMUSG00000000301	Pemt
	ENSMUSG00000000303	Cdh1
	ENSMUSG00000000305	Cdh4
	ENSMUSG00000000308	Ckmt1
	ENSMUSG00000000317	Bcl6b
	ENSMUSG00000000318	Clec10a
	ENSMUSG00000000320	Alox12
	ENSMUSG00000000325	Arvcf
	ENSMUSG00000000326	Comt
	ENSMUSG00000000339	Rtca
	ENSMUSG00000000340	Dbt
	ENSMUSG00000000346	Dazap2
	ENSMUSG00000000359	Rem1
	ENSMUSG00000000365	Rnf17
	ENSMUSG00000000374	Trappc10
	ENSMUSG00000000378	Ccm2
	ENSMUSG00000000381	Wap
	ENSMUSG00000000384	Tbrg4
	ENSMUSG00000000385	Tmprss2
	ENSMUSG00000000386	Mx1
	ENSMUSG00000000392	Fap
	ENSMUSG00000000394	Gcg
	ENSMUSG00000000399	Ndufa9
	ENSMUSG00000000409	Lck
	ENSMUSG00000000411	Tssk3
	ENSMUSG00000000416	Cttnbp2
	ENSMUSG00000000420	Galnt1
	ENSMUSG00000000435	Myf5
	ENSMUSG00000000439	Mkrn2
	ENSMUSG00000000440	Pparg
	ENSMUSG00000000441	Raf1
	ENSMUSG00000000486	Sept1
	ENSMUSG00000000489	Pdgfb
	ENSMUSG00000000530	Acvrl1
	ENSMUSG00000000531	Grasp
	ENSMUSG00000000532	Acvr1b
	ENSMUSG00000000538	Tom1l2
	ENSMUSG00000000544	Gpa33
	ENSMUSG00000000552	Zfp385a
	ENSMUSG00000000555	Itga5
	ENSMUSG00000000560	Gabra2
	ENSMUSG00000000561	Wdr77
	ENSMUSG00000000562	Adora3
	ENSMUSG00000000563	Atp5f1
	ENSMUSG00000000567	Sox9
	ENSMUSG00000000568	Hnrnpd
	ENSMUSG00000000579	Dynlt1c
	ENSMUSG00000000581	C1d
	ENSMUSG00000000594	Gm2a
	ENSMUSG00000000600	Krit1
	ENSMUSG00000000605	Clcn4-2
	ENSMUSG00000000606	Vmn2r88
	ENSMUSG00000000617	Grm6
	ENSMUSG00000000627	Sema4f
	ENSMUSG00000000628	Hk2
	ENSMUSG00000000631	Myo18a
	ENSMUSG00000000632	Sez6
	ENSMUSG00000000673	Haao
	ENSMUSG00000000682	Cd52
	ENSMUSG00000000686	Abhd15
	ENSMUSG00000000690	Hoxb6
	ENSMUSG00000000693	Loxl3
	ENSMUSG00000000701	Tcl1b5
	ENSMUSG00000000706	Btn1a1
	ENSMUSG00000000708	Kat2b
	ENSMUSG00000000711	Rab5b
	ENSMUSG00000000724	Cryba1
	ENSMUSG00000000730	Dnmt3l
	ENSMUSG00000000731	Aire
	ENSMUSG00000000732	Icosl
	ENSMUSG00000000738	Spg7
	ENSMUSG00000000739	Sult5a1
	ENSMUSG00000000740	Rpl13
	ENSMUSG00000000743	Chmp1a
	ENSMUSG00000000751	Rpa1
	ENSMUSG00000000753	Serpinf1
	ENSMUSG00000000759	Tubgcp3
	ENSMUSG00000000766	Oprm1
	ENSMUSG00000000776	Polr3d
	ENSMUSG00000000782	Tcf7
	ENSMUSG00000000791	Il12rb1
	ENSMUSG00000000792	Slc5a5
	ENSMUSG00000000794	Kcnn3
	ENSMUSG00000000804	Usp32
	ENSMUSG00000000805	Car4
	ENSMUSG00000000811	Txnrd3
	ENSMUSG00000000817	Fasl
	ENSMUSG00000000823	Znf512b
	ENSMUSG00000000826	Dnajc5
	ENSMUSG00000000827	Tpd52l2
	ENSMUSG00000000861	Bcl11a
	ENSMUSG00000000869	Il4
	ENSMUSG00000000876	Pxmp4
	ENSMUSG00000000884	Gnb1l
	ENSMUSG00000000889	Dbh
	ENSMUSG00000000901	Mmp11
	ENSMUSG00000000902	Smarcb1
	ENSMUSG00000000903	Vpreb3
	ENSMUSG00000000915	Hip1r
	ENSMUSG00000000916	Nsun5
	ENSMUSG00000000934	Top1mt
	ENSMUSG00000000938	Hoxa10
	ENSMUSG00000000942	Hoxa4
	ENSMUSG00000000948	Snrpn
	ENSMUSG00000000957	Mmp14
	ENSMUSG00000000958	Slc7a7
	ENSMUSG00000000959	Oxa1l
	ENSMUSG00000000976	Heatr6
	ENSMUSG00000000982	Ccl3
	ENSMUSG00000000983	Wfdc18
	ENSMUSG00000001014	Icam4
	ENSMUSG00000001016	Ilf2
	ENSMUSG00000001017	Chtop
	ENSMUSG00000001018	Snapin
	ENSMUSG00000001020	S100a4
	ENSMUSG00000001021	S100a3
	ENSMUSG00000001023	S100a5
	ENSMUSG00000001025	S100a6
	ENSMUSG00000001027	Scn4a
	ENSMUSG00000001029	Icam2
	ENSMUSG00000001034	Mapk7
	ENSMUSG00000001036	Epn2
	ENSMUSG00000001039	B9d1
	ENSMUSG00000001052	Sec24b
	ENSMUSG00000001053	N4bp3
	ENSMUSG00000001054	Rmnd5b
	ENSMUSG00000001056	Nhp2
	ENSMUSG00000001062	Vps9d1
	ENSMUSG00000001065	Zfp276
	ENSMUSG00000001076	C1ql4
	ENSMUSG00000001082	Mfsd10
	ENSMUSG00000001089	Luzp1
	ENSMUSG00000001095	Slc13a2
	ENSMUSG00000001098	Kctd10
	ENSMUSG00000001100	Poldip2
	ENSMUSG00000001103	Sebox
	ENSMUSG00000001105	Ift20
	ENSMUSG00000001119	Col6a1
	ENSMUSG00000001120	Pcbp3
	ENSMUSG00000001123	Lgals9
	ENSMUSG00000001138	Cnnm3
	ENSMUSG00000001143	Lman2l
	ENSMUSG00000001150	Mcm3ap
	ENSMUSG00000001151	Pcnt
	ENSMUSG00000001155	Ftcd
	ENSMUSG00000001156	Mxd1
	ENSMUSG00000001157	Gmcl1
	ENSMUSG00000001158	Snrnp27
	ENSMUSG00000001166	Oas1c
	ENSMUSG00000001168	Oas1h
	ENSMUSG00000001175	Calm1
	ENSMUSG00000001211	Agpat3
	ENSMUSG00000001225	Slc26a3
	ENSMUSG00000001227	Sema6b
	ENSMUSG00000001228	Uhrf1
	ENSMUSG00000001229	Dpp9
	ENSMUSG00000001240	Ramp2
	ENSMUSG00000001247	Lsr
	ENSMUSG00000001248	Gramd1a
	ENSMUSG00000001249	Hpn
	ENSMUSG00000001260	Gabrg1
	ENSMUSG00000001270	Ckb
	ENSMUSG00000001280	Sp1
	ENSMUSG00000001281	Itgb7
	ENSMUSG00000001285	Myg1
	ENSMUSG00000001288	Rarg
	ENSMUSG00000001289	Pfdn5
	ENSMUSG00000001300	Efnb2
	ENSMUSG00000001305	Rrp15
	ENSMUSG00000001313	Rnd2
	ENSMUSG00000001323	Srr
	ENSMUSG00000001333	Sync
	ENSMUSG00000001334	Fndc5
	ENSMUSG00000001348	Acp5
	ENSMUSG00000001349	Cnn1
	ENSMUSG00000001366	Fbxo9
	ENSMUSG00000001376	Ccdc132
	ENSMUSG00000001379	Apbb3
	ENSMUSG00000001380	Hars
	ENSMUSG00000001383	Zmat2
	ENSMUSG00000001403	Ube2c
	ENSMUSG00000001415	Smg5
	ENSMUSG00000001416	Cct3
	ENSMUSG00000001417	Rhbg
	ENSMUSG00000001418	0610031J06Rik
	ENSMUSG00000001419	Mef2d
	ENSMUSG00000001420	Tmem79
	ENSMUSG00000001424	Snd1
	ENSMUSG00000001435	Col18a1
	ENSMUSG00000001436	Slc19a1
	ENSMUSG00000001440	Kpnb1
	ENSMUSG00000001441	Npepps
	ENSMUSG00000001444	Tbx21
	ENSMUSG00000001445	Mrpl10
	ENSMUSG00000001467	Cyp51
	ENSMUSG00000001472	Tcf25
	ENSMUSG00000001473	Tubb6
	ENSMUSG00000001482	Def8
	ENSMUSG00000001493	Meox1
	ENSMUSG00000001494	Sost
	ENSMUSG00000001496	Nkx2-1
	ENSMUSG00000001497	Pax9
	ENSMUSG00000001504	Irx2
	ENSMUSG00000001506	Col1a1
	ENSMUSG00000001507	Itga3
	ENSMUSG00000001508	Sgca
	ENSMUSG00000001510	Dlx3
	ENSMUSG00000001517	Foxm1
	ENSMUSG00000001518	Itfg2
	ENSMUSG00000001520	Nrip2
	ENSMUSG00000001521	Tulp3
	ENSMUSG00000001524	Gtf2h4
	ENSMUSG00000001525	Tubb5
	ENSMUSG00000001542	Ell2
	ENSMUSG00000001552	Jup
	ENSMUSG00000001555	Fkbp10
	ENSMUSG00000001558	Klhl10
	ENSMUSG00000001566	Mnx1
	ENSMUSG00000001569	Nom1
	ENSMUSG00000001576	Ergic1
	ENSMUSG00000001583	Tnk1
	ENSMUSG00000001588	Acap1
	ENSMUSG00000001604	Tcea3
	ENSMUSG00000001622	Csn3
	ENSMUSG00000001627	Ifrd1
	ENSMUSG00000001630	Stk38l
	ENSMUSG00000001632	Brpf1
	ENSMUSG00000001642	Akr1b3
	ENSMUSG00000001655	Hoxc13
	ENSMUSG00000001656	Hoxc11
	ENSMUSG00000001657	Hoxc8
	ENSMUSG00000001661	Hoxc6
	ENSMUSG00000001663	Gstt1
	ENSMUSG00000001665	Gstt3
	ENSMUSG00000001666	Ddt
	ENSMUSG00000001670	Tat
	ENSMUSG00000001672	Marveld3
	ENSMUSG00000001674	Ddx18
	ENSMUSG00000001687	Ubl3
	ENSMUSG00000001700	Gramd3
	ENSMUSG00000001707	Eef1e1
	ENSMUSG00000001729	Akt1
	ENSMUSG00000001739	Cldn15
	ENSMUSG00000001741	Il16
	ENSMUSG00000001750	Tcirg1
	ENSMUSG00000001751	Naglu
	ENSMUSG00000001755	Coasy
	ENSMUSG00000001761	Smo
	ENSMUSG00000001763	Tspan33
	ENSMUSG00000001767	Crnkl1
	ENSMUSG00000001768	Rin2
	ENSMUSG00000001773	Folh1
	ENSMUSG00000001774	Chordc1
	ENSMUSG00000001783	D10Wsu52e
	ENSMUSG00000001785	Pwp1
	ENSMUSG00000001786	Fbxo7
	ENSMUSG00000001794	Capns1
	ENSMUSG00000001802	Lrp3
	ENSMUSG00000001804	Dsg4
	ENSMUSG00000001815	Evx2
	ENSMUSG00000001819	Hoxd13
	ENSMUSG00000001823	Hoxd12
	ENSMUSG00000001827	Folr1
	ENSMUSG00000001829	Clpb
	ENSMUSG00000001833	Sept7
	ENSMUSG00000001844	Zdhhc4
	ENSMUSG00000001847	Rac1
	ENSMUSG00000001855	Nup214
	ENSMUSG00000001864	Aif1l
	ENSMUSG00000001865	Cpa3
	ENSMUSG00000001870	Ltbp1
	ENSMUSG00000001891	Ugp2
	ENSMUSG00000001901	Kcnh6
	ENSMUSG00000001909	Trmt1
	ENSMUSG00000001910	Nacc1
	ENSMUSG00000001911	Nfix
	ENSMUSG00000001918	Slc1a5
	ENSMUSG00000001930	Vwf
	ENSMUSG00000001942	Siae
	ENSMUSG00000001943	Vsig2
	ENSMUSG00000001946	Esam
	ENSMUSG00000001948	Spa17
	ENSMUSG00000001983	Taco1
	ENSMUSG00000001985	Grik3
	ENSMUSG00000001988	Npas1
	ENSMUSG00000001995	Sipa1l2
	ENSMUSG00000001998	Ap4e1
	ENSMUSG00000001999	Blvra
	ENSMUSG00000002017	Fam98a
	ENSMUSG00000002020	Ltbp2
	ENSMUSG00000002028	Mll1
	ENSMUSG00000002031	Ift46
	ENSMUSG00000002032	Tmem25
	ENSMUSG00000002033	Cd3g
	ENSMUSG00000002043	Trappc6a
	ENSMUSG00000002052	Supt6
	ENSMUSG00000002055	Spag5
	ENSMUSG00000002057	Foxn1
	ENSMUSG00000002058	Unc119
	ENSMUSG00000002059	Rab34
	ENSMUSG00000002064	Sdf2
	ENSMUSG00000002068	Ccne1
	ENSMUSG00000002076	Hsf2bp
	ENSMUSG00000002083	Bbc3
	ENSMUSG00000002100	Mybpc3
	ENSMUSG00000002102	Psmc3
	ENSMUSG00000002103	Acp2
	ENSMUSG00000002104	Rapsn
	ENSMUSG00000002105	Slc39a13
	ENSMUSG00000002107	Celf2
	ENSMUSG00000002108	Nr1h3
	ENSMUSG00000002109	Ddb2
	ENSMUSG00000002111	Sfpi1
	ENSMUSG00000002129	Sf3a1
	ENSMUSG00000002147	Stat6
	ENSMUSG00000002190	Clgn
	ENSMUSG00000002204	Napsa
	ENSMUSG00000002205	Vrk3
	ENSMUSG00000002210	Smg9
	ENSMUSG00000002221	Paxip1
	ENSMUSG00000002222	Rmnd5a
	ENSMUSG00000002227	Mov10
	ENSMUSG00000002228	Ppm1j
	ENSMUSG00000002233	Rhoc
	ENSMUSG00000002240	4930432K09Rik
	ENSMUSG00000002249	Tead3
	ENSMUSG00000002250	Ppard
	ENSMUSG00000002257	Def6
	ENSMUSG00000002265	Peg3
	ENSMUSG00000002266	Zim1
	ENSMUSG00000002274	Metrn
	ENSMUSG00000002279	Lmf1
	ENSMUSG00000002280	Narfl
	ENSMUSG00000002289	Angptl4
	ENSMUSG00000002297	Dbf4
	ENSMUSG00000002307	Daxx
	ENSMUSG00000002308	Cd320
	ENSMUSG00000002319	Ipo4
	ENSMUSG00000002320	Tm9sf1
	ENSMUSG00000002324	Rec8
	ENSMUSG00000002325	Irf9
	ENSMUSG00000002326	Gmpr2
	ENSMUSG00000002329	Mdp1
	ENSMUSG00000002332	Dhrs1
	ENSMUSG00000002341	Ncan
	ENSMUSG00000002342	Tmem161a
	ENSMUSG00000002343	Armc6
	ENSMUSG00000002345	2310045N01Rik
	ENSMUSG00000002346	Slc25a42
	ENSMUSG00000002365	Snx9
	ENSMUSG00000002372	Ranbp3
	ENSMUSG00000002379	Ndufa11
	ENSMUSG00000002384	Bmp8b
	ENSMUSG00000002393	Nr2f6
	ENSMUSG00000002395	Use1
	ENSMUSG00000002396	Ocel1
	ENSMUSG00000002409	Dyrk1b
	ENSMUSG00000002413	Braf
	ENSMUSG00000002416	Ndufb2
	ENSMUSG00000002428	Hltf
	ENSMUSG00000002455	Prpf6
	ENSMUSG00000002458	Rgs19
	ENSMUSG00000002459	Rgs20
	ENSMUSG00000002475	Abhd3
	ENSMUSG00000002477	Snrpd1
	ENSMUSG00000002486	Tchp
	ENSMUSG00000002489	Tiam1
	ENSMUSG00000002496	Tsc2
	ENSMUSG00000002500	Rpl3l
	ENSMUSG00000002504	Slc9a3r2
	ENSMUSG00000002524	Puf60
	ENSMUSG00000002546	Golga2
	ENSMUSG00000002550	Uck1
	ENSMUSG00000002565	Scin
	ENSMUSG00000002578	Ikzf4
	ENSMUSG00000002580	Mien1
	ENSMUSG00000002588	Pon1
	ENSMUSG00000002602	Axl
	ENSMUSG00000002603	Tgfb1
	ENSMUSG00000002608	Ccdc97
	ENSMUSG00000002617	Zfp40
	ENSMUSG00000002625	Akap8l
	ENSMUSG00000002633	Shh
	ENSMUSG00000002635	Pdcd2l
	ENSMUSG00000002658	Gtf2f1
	ENSMUSG00000002660	Clpp
	ENSMUSG00000002661	Alkbh7
	ENSMUSG00000002664	Pspn
	ENSMUSG00000002668	Dennd1c
	ENSMUSG00000002679	Med6
	ENSMUSG00000002688	Prkd1
	ENSMUSG00000002699	Lcp2
	ENSMUSG00000002718	Cse1l
	ENSMUSG00000002728	Naa20
	ENSMUSG00000002731	Prkra
	ENSMUSG00000002732	Fkbp7
	ENSMUSG00000002733	Plekha3
	ENSMUSG00000002741	Ykt6
	ENSMUSG00000002748	Baz1b
	ENSMUSG00000002763	Pex6
	ENSMUSG00000002767	Mrpl2
	ENSMUSG00000002768	Mea1
	ENSMUSG00000002769	Gnmt
	ENSMUSG00000002771	Grin2d
	ENSMUSG00000002778	Kdelr1
	ENSMUSG00000002781	Tmem143
	ENSMUSG00000002791	Pdxk-ps
	ENSMUSG00000002797	Ggct
	ENSMUSG00000002799	Jag2
	ENSMUSG00000002803	Btbd6
	ENSMUSG00000002804	Nudt14
	ENSMUSG00000002808	Epdr1
	ENSMUSG00000002812	Flii
	ENSMUSG00000002814	Top3a
	ENSMUSG00000002820	Atg4d
	ENSMUSG00000002825	Qtrt1
	ENSMUSG00000002831	Plin4
	ENSMUSG00000002833	Hdgfrp2
	ENSMUSG00000002835	Chaf1a
	ENSMUSG00000002844	Adprh
	ENSMUSG00000002845	Tmem39a
	ENSMUSG00000002846	Timmdc1
	ENSMUSG00000002847	Pla1a
	ENSMUSG00000002870	Mcm2
	ENSMUSG00000002871	Tpra1
	ENSMUSG00000002881	Nab1
	ENSMUSG00000002885	Cd97
	ENSMUSG00000002897	Il17ra
	ENSMUSG00000002900	Lamb1
	ENSMUSG00000002908	Kcnn1
	ENSMUSG00000002910	Arrdc2
	ENSMUSG00000002930	Ppp1r17
	ENSMUSG00000002944	Cd36
	ENSMUSG00000002948	Map2k7
	ENSMUSG00000002949	Timm44
	ENSMUSG00000002957	Ap2a2
	ENSMUSG00000002963	Pnkp
	ENSMUSG00000002968	Med25
	ENSMUSG00000002980	Bcam
	ENSMUSG00000002981	Clptm1
	ENSMUSG00000002983	Relb
	ENSMUSG00000002984	Tomm40
	ENSMUSG00000002985	Apoe
	ENSMUSG00000002992	Apoc2
	ENSMUSG00000002996	Hbp1
	ENSMUSG00000002997	Prkar2b
	ENSMUSG00000003031	Cdkn1b
	ENSMUSG00000003032	Klf4
	ENSMUSG00000003033	Ap1m1
	ENSMUSG00000003037	Rab8a
	ENSMUSG00000003038	Hmgn2
	ENSMUSG00000003039	Fam32a
	ENSMUSG00000003051	Elf3
	ENSMUSG00000003053	Cyp2c29
	ENSMUSG00000003062	Stard3nl
	ENSMUSG00000003068	Stk11
	ENSMUSG00000003070	Efna2
	ENSMUSG00000003072	Atp5d
	ENSMUSG00000003099	Ppp5c
	ENSMUSG00000003119	Cdk12
	ENSMUSG00000003123	Lipe
	ENSMUSG00000003131	Pafah1b2
	ENSMUSG00000003134	Tbc1d8
	ENSMUSG00000003135	Cnot11
	ENSMUSG00000003153	Slc2a3
	ENSMUSG00000003154	Foxj2
	ENSMUSG00000003161	Sri
	ENSMUSG00000003166	Dgcr2
	ENSMUSG00000003178	Mical3
	ENSMUSG00000003184	Irf3
	ENSMUSG00000003190	Bcl2l12
	ENSMUSG00000003198	Zfp959
	ENSMUSG00000003199	Mpnd
	ENSMUSG00000003200	Sh3gl1
	ENSMUSG00000003206	Ebi3
	ENSMUSG00000003208	Ccdc94
	ENSMUSG00000003226	Ranbp2
	ENSMUSG00000003227	Edar
	ENSMUSG00000003228	Grk5
	ENSMUSG00000003233	Dvl3
	ENSMUSG00000003234	Abcf3
	ENSMUSG00000003235	Eif2b5
	ENSMUSG00000003269	Cyth2
	ENSMUSG00000003271	Sult2b1
	ENSMUSG00000003273	Car11
	ENSMUSG00000003279	Dlgap1
	ENSMUSG00000003282	Plag1
	ENSMUSG00000003283	Hck
	ENSMUSG00000003299	Mrpl4
	ENSMUSG00000003308	Keap1
	ENSMUSG00000003309	Ap1m2
	ENSMUSG00000003316	Glg1
	ENSMUSG00000003341	Atp8b3
	ENSMUSG00000003344	Btbd2
	ENSMUSG00000003345	Csnk1g2
	ENSMUSG00000003346	Abhd17a
	ENSMUSG00000003348	Mob3a
	ENSMUSG00000003352	Cacnb3
	ENSMUSG00000003354	Ccdc65
	ENSMUSG00000003355	Fkbp11
	ENSMUSG00000003360	Ddx23
	ENSMUSG00000003363	Pld3
	ENSMUSG00000003378	Grik5
	ENSMUSG00000003379	Cd79a
	ENSMUSG00000003380	Rabac1
	ENSMUSG00000003382	Etv3
	ENSMUSG00000003402	Prkcsh
	ENSMUSG00000003410	Elavl3
	ENSMUSG00000003411	Rab3b
	ENSMUSG00000003418	St8sia6
	ENSMUSG00000003420	Fcgrt
	ENSMUSG00000003421	Nosip
	ENSMUSG00000003423	Pih1d1
	ENSMUSG00000003429	Rps11
	ENSMUSG00000003435	Supt5
	ENSMUSG00000003436	Dll3
	ENSMUSG00000003437	Paf1
	ENSMUSG00000003438	Timm50
	ENSMUSG00000003444	Med29
	ENSMUSG00000003452	Bicd1
	ENSMUSG00000003458	Ncstn
	ENSMUSG00000003464	Pex19
	ENSMUSG00000003469	Phyhip
	ENSMUSG00000003476	Crhr2
	ENSMUSG00000003477	Inmt
	ENSMUSG00000003484	Cyp4f18
	ENSMUSG00000003500	Impdh1
	ENSMUSG00000003505	Psg18
	ENSMUSG00000003518	Dusp3
	ENSMUSG00000003526	Prodh
	ENSMUSG00000003527	Dgcr14
	ENSMUSG00000003528	Slc25a1
	ENSMUSG00000003531	Dgcr6
	ENSMUSG00000003534	Ddr1
	ENSMUSG00000003541	Ier3
	ENSMUSG00000003545	Fosb
	ENSMUSG00000003546	Klc4
	ENSMUSG00000003549	Ercc1
	ENSMUSG00000003555	Cyp17a1
	ENSMUSG00000003559	As3mt
	ENSMUSG00000003573	Homer3
	ENSMUSG00000003575	Crtc1
	ENSMUSG00000003581	Rnf215
	ENSMUSG00000003585	Sec14l2
	ENSMUSG00000003604	Aven
	ENSMUSG00000003617	Cp
	ENSMUSG00000003623	Crot
	ENSMUSG00000003644	Rps6ka1
	ENSMUSG00000003657	Calb2
	ENSMUSG00000003660	Snrnp200
	ENSMUSG00000003662	Ciao1
	ENSMUSG00000003665	Has1
	ENSMUSG00000003680	Taf6l
	ENSMUSG00000003721	Insig2
	ENSMUSG00000003731	Kpna6
	ENSMUSG00000003746	Man1a
	ENSMUSG00000003752	Itpkc
	ENSMUSG00000003762	Adck4
	ENSMUSG00000003778	Brd8
	ENSMUSG00000003779	Kif20a
	ENSMUSG00000003808	Farsa
	ENSMUSG00000003809	Gcdh
	ENSMUSG00000003810	Mast2
	ENSMUSG00000003812	Dnase2a
	ENSMUSG00000003813	Rad23a
	ENSMUSG00000003814	Calr
	ENSMUSG00000003824	Syce2
	ENSMUSG00000003847	Nfat5
	ENSMUSG00000003848	Nob1
	ENSMUSG00000003849	Nqo1
	ENSMUSG00000003863	Ppfia3
	ENSMUSG00000003865	Gys1
	ENSMUSG00000003868	Ruvbl2
	ENSMUSG00000003872	Lin7b
	ENSMUSG00000003873	Bax
	ENSMUSG00000003882	Il7r
	ENSMUSG00000003923	Tfam
	ENSMUSG00000003929	Zfp81
	ENSMUSG00000003934	Efnb3
	ENSMUSG00000003948	Mmd
	ENSMUSG00000003949	Hlf
	ENSMUSG00000003955	Fam162a
	ENSMUSG00000003970	Rpl8
	ENSMUSG00000003974	Grm3
	ENSMUSG00000003992	Ssbp2
	ENSMUSG00000004018	Fancl
	ENSMUSG00000004031	Fam5b
	ENSMUSG00000004032	Gstm5
	ENSMUSG00000004035	Gstm7
	ENSMUSG00000004038	Gstm3
	ENSMUSG00000004040	Stat3
	ENSMUSG00000004043	Stat5a
	ENSMUSG00000004044	Ptrf
	ENSMUSG00000004054	Map3k11
	ENSMUSG00000004056	Akt2
	ENSMUSG00000004069	Dnaja3
	ENSMUSG00000004070	Hmox2
	ENSMUSG00000004071	Cdip1
	ENSMUSG00000004085	B230120H23Rik
	ENSMUSG00000004096	Cwc15
	ENSMUSG00000004098	Col5a3
	ENSMUSG00000004099	Dnmt1
	ENSMUSG00000004100	Ppan
	ENSMUSG00000004105	Angptl2
	ENSMUSG00000004110	Cacna1e
	ENSMUSG00000004113	Cacna1b
	ENSMUSG00000004127	Trmt10a
	ENSMUSG00000004151	Etv1
	ENSMUSG00000004187	Kifc2
	ENSMUSG00000004207	Psap
	ENSMUSG00000004231	Pax2
	ENSMUSG00000004233	Wars2
	ENSMUSG00000004263	Atn1
	ENSMUSG00000004264	Phb2
	ENSMUSG00000004266	Ptpn6
	ENSMUSG00000004267	Eno2
	ENSMUSG00000004268	Emg1
	ENSMUSG00000004270	Lpcat3
	ENSMUSG00000004285	Atp6v1f
	ENSMUSG00000004296	Il12b
	ENSMUSG00000004319	Clcn3
	ENSMUSG00000004328	Hif3a
	ENSMUSG00000004341	Gpx6
	ENSMUSG00000004344	Gpx5
	ENSMUSG00000004347	Pde1c
	ENSMUSG00000004356	Utp20
	ENSMUSG00000004359	Spic
	ENSMUSG00000004360	9330159F19Rik
	ENSMUSG00000004364	Cul3
	ENSMUSG00000004366	Sst
	ENSMUSG00000004371	Il11
	ENSMUSG00000004383	Large
	ENSMUSG00000004393	Ddx56
	ENSMUSG00000004394	Tmed4
	ENSMUSG00000004415	Col26a1
	ENSMUSG00000004446	Bid
	ENSMUSG00000004451	Ralb
	ENSMUSG00000004455	Ppp1cc
	ENSMUSG00000004460	Dnajb11
	ENSMUSG00000004462	Tbccd1
	ENSMUSG00000004473	Clec11a
	ENSMUSG00000004500	Zfp324
	ENSMUSG00000004508	Gab2
	ENSMUSG00000004530	Coro1c
	ENSMUSG00000004535	Tax1bp1
	ENSMUSG00000004540	Psg17
	ENSMUSG00000004542	Psg19
	ENSMUSG00000004552	Ctse
	ENSMUSG00000004558	Ndrg2
	ENSMUSG00000004561	Mettl17
	ENSMUSG00000004562	Arhgef40
	ENSMUSG00000004565	Pnpla6
	ENSMUSG00000004567	Mcoln1
	ENSMUSG00000004568	Arhgef18
	ENSMUSG00000004591	Pkn2
	ENSMUSG00000004609	Cd33
	ENSMUSG00000004610	Etfb
	ENSMUSG00000004612	Nkg7
	ENSMUSG00000004613	Lim2
	ENSMUSG00000004626	Stxbp2
	ENSMUSG00000004630	Pcp2
	ENSMUSG00000004631	Sgce
	ENSMUSG00000004633	Chn2
	ENSMUSG00000004637	Wwox
	ENSMUSG00000004642	Slbp
	ENSMUSG00000004651	Tyr
	ENSMUSG00000004654	Ghrhr
	ENSMUSG00000004655	Aqp1
	ENSMUSG00000004661	Arid3b
	ENSMUSG00000004665	Cnn2
	ENSMUSG00000004667	Polr2e
	ENSMUSG00000004668	Abca13
	ENSMUSG00000004677	Myo9b
	ENSMUSG00000004698	Hdac9
	ENSMUSG00000004707	Ly9
	ENSMUSG00000004709	Cd244
	ENSMUSG00000004730	Emr1
	ENSMUSG00000004748	Mtfp1
	ENSMUSG00000004768	Rab23
	ENSMUSG00000004771	Rab11a
	ENSMUSG00000004788	Eif2b2
	ENSMUSG00000004789	Dlst
	ENSMUSG00000004791	Pgf
	ENSMUSG00000004798	Ulk2
	ENSMUSG00000004814	Ccl24
	ENSMUSG00000004815	Dgkq
	ENSMUSG00000004821	Tmed11
	ENSMUSG00000004837	Grap
	ENSMUSG00000004842	Pou1f1
	ENSMUSG00000004843	Chmp2b
	ENSMUSG00000004846	Plod3
	ENSMUSG00000004849	Ap1s1
	ENSMUSG00000004864	Mapk13
	ENSMUSG00000004865	Srpk1
	ENSMUSG00000004872	Pax3
	ENSMUSG00000004880	Lbr
	ENSMUSG00000004885	Crabp2
	ENSMUSG00000004891	Nes
	ENSMUSG00000004892	Bcan
	ENSMUSG00000004894	Hapln2
	ENSMUSG00000004895	Prcc
	ENSMUSG00000004896	Rrnad1
	ENSMUSG00000004897	Hdgf
	ENSMUSG00000004902	Slc25a18
	ENSMUSG00000004929	Thop1
	ENSMUSG00000004931	Apba3
	ENSMUSG00000004933	Matk
	ENSMUSG00000004934	Pias4
	ENSMUSG00000004936	Map2k1
	ENSMUSG00000004937	Sgta
	ENSMUSG00000004939	Nmrk2
	ENSMUSG00000004945	Tmem242
	ENSMUSG00000004947	Dtx2
	ENSMUSG00000004948	Zp3
	ENSMUSG00000004951	Hspb1
	ENSMUSG00000004952	Rasa4
	ENSMUSG00000004961	Syt5
	ENSMUSG00000004980	Hnrnpa2b1
	ENSMUSG00000004988	Fxyd4
	ENSMUSG00000004994	Ccdc130
	ENSMUSG00000004996	Mri1
	ENSMUSG00000005034	Prkacb
	ENSMUSG00000005043	Sgsh
	ENSMUSG00000005045	Chd5
	ENSMUSG00000005054	Cstb
	ENSMUSG00000005057	Sh2b2
	ENSMUSG00000005069	Pex5
	ENSMUSG00000005078	Jkamp
	ENSMUSG00000005087	Cd44
	ENSMUSG00000005089	Slc1a2
	ENSMUSG00000005102	Eif2ak4
	ENSMUSG00000005103	Wdr1
	ENSMUSG00000005107	Slc2a9
	ENSMUSG00000005124	Wisp1
	ENSMUSG00000005125	Ndrg1
	ENSMUSG00000005131	4930550C14Rik
	ENSMUSG00000005142	Man2b1
	ENSMUSG00000005148	Klf5
	ENSMUSG00000005150	Wdr83
	ENSMUSG00000005161	Prdx2
	ENSMUSG00000005198	Polr2a
	ENSMUSG00000005202	Shbg
	ENSMUSG00000005204	Senp3
	ENSMUSG00000005220	Corin
	ENSMUSG00000005225	Plekha8
	ENSMUSG00000005232	G6pc2
	ENSMUSG00000005233	Spc25
	ENSMUSG00000005237	Dnahc2
	ENSMUSG00000005251	Ripk4
	ENSMUSG00000005262	Ufd1l
	ENSMUSG00000005267	Zfp287
	ENSMUSG00000005268	Prlr
	ENSMUSG00000005299	Letm1
	ENSMUSG00000005312	Ubqln1
	ENSMUSG00000005320	Fgfr4
	ENSMUSG00000005338	Cadm3
	ENSMUSG00000005339	Fcer1a
	ENSMUSG00000005354	Txn2
	ENSMUSG00000005355	Casp14
	ENSMUSG00000005357	Slc1a6
	ENSMUSG00000005360	Slc1a3
	ENSMUSG00000005362	Crbn
	ENSMUSG00000005364	Il5ra
	ENSMUSG00000005370	Msh6
	ENSMUSG00000005371	Fbxo11
	ENSMUSG00000005373	Mlxipl
	ENSMUSG00000005374	Tbl2
	ENSMUSG00000005378	Wbscr22
	ENSMUSG00000005397	Nid1
	ENSMUSG00000005410	Mcm5
	ENSMUSG00000005413	Hmox1
	ENSMUSG00000005417	Mprip
	ENSMUSG00000005442	Cic
	ENSMUSG00000005447	Pafah1b3
	ENSMUSG00000005465	Il27ra
	ENSMUSG00000005469	Prkaca
	ENSMUSG00000005470	Asf1b
	ENSMUSG00000005474	Myl10
	ENSMUSG00000005481	Ddx39
	ENSMUSG00000005483	Dnajb1
	ENSMUSG00000005493	Msh4
	ENSMUSG00000005501	Usp40
	ENSMUSG00000005503	Evx1
	ENSMUSG00000005505	Kbtbd4
	ENSMUSG00000005506	Celf1
	ENSMUSG00000005510	Ndufs3
	ENSMUSG00000005514	Por
	ENSMUSG00000005533	Igf1r
	ENSMUSG00000005534	Insr
	ENSMUSG00000005540	Fcer2a
	ENSMUSG00000005547	Cyp2a5
	ENSMUSG00000005553	Atp4a
	ENSMUSG00000005566	Trim28
	ENSMUSG00000005575	Ube2m
	ENSMUSG00000005580	Adcy9
	ENSMUSG00000005583	Mef2c
	ENSMUSG00000005609	Ctr9
	ENSMUSG00000005610	Eif4g2
	ENSMUSG00000005611	Mrvi1
	ENSMUSG00000005615	Pcyt1a
	ENSMUSG00000005621	Zfp592
	ENSMUSG00000005625	Psmd4
	ENSMUSG00000005628	Tmod4
	ENSMUSG00000005640	Insrr
	ENSMUSG00000005649	Cabp5
	ENSMUSG00000005656	Snx6
	ENSMUSG00000005667	Mthfd2
	ENSMUSG00000005672	Kit
	ENSMUSG00000005674	Tomm40l
	ENSMUSG00000005677	Nr1i3
	ENSMUSG00000005681	Apoa2
	ENSMUSG00000005682	Pan2
	ENSMUSG00000005683	Cs
	ENSMUSG00000005686	Ampd3
	ENSMUSG00000005687	Bcas2
	ENSMUSG00000005698	Ctcf
	ENSMUSG00000005699	Pard6a
	ENSMUSG00000005705	Agrp
	ENSMUSG00000005716	Pvalb
	ENSMUSG00000005718	Tfap4
	ENSMUSG00000005732	Ranbp1
	ENSMUSG00000005763	Cd247
	ENSMUSG00000005774	Rfx5
	ENSMUSG00000005779	Psmb4
	ENSMUSG00000005800	Mmp8
	ENSMUSG00000005802	Slc30a4
	ENSMUSG00000005803	Sqrdl
	ENSMUSG00000005804	Bloc1s6
	ENSMUSG00000005813	Metap1
	ENSMUSG00000005823	Gpr108
	ENSMUSG00000005824	Tnfsf14
	ENSMUSG00000005836	Gata6
	ENSMUSG00000005846	Rsl1d1
	ENSMUSG00000005871	Apc
	ENSMUSG00000005873	Reep5
	ENSMUSG00000005881	Ergic3
	ENSMUSG00000005882	Uqcc
	ENSMUSG00000005883	Spo11
	ENSMUSG00000005886	Ncoa2
	ENSMUSG00000005891	Prl4a1
	ENSMUSG00000005892	Trh
	ENSMUSG00000005893	Nr2c2
	ENSMUSG00000005897	Nr2c1
	ENSMUSG00000005899	Smpd4
	ENSMUSG00000005907	Pex1
	ENSMUSG00000005917	Otx1
	ENSMUSG00000005936	Kctd20
	ENSMUSG00000005947	Itgae
	ENSMUSG00000005949	Ctns
	ENSMUSG00000005950	P2rx5
	ENSMUSG00000005951	Shpk
	ENSMUSG00000005952	Trpv1
	ENSMUSG00000005958	Ephb3
	ENSMUSG00000005968	Tuft1
	ENSMUSG00000005973	Rcn1
	ENSMUSG00000005980	Dnase1
	ENSMUSG00000005981	Trap1
	ENSMUSG00000005982	Naa60
	ENSMUSG00000005983	1700037C18Rik
	ENSMUSG00000005986	Ankrd13d
	ENSMUSG00000005994	Tyrp1
	ENSMUSG00000006005	Tpr
	ENSMUSG00000006007	Pdc
	ENSMUSG00000006010	BC003331
	ENSMUSG00000006014	Prg4
	ENSMUSG00000006019	Dhx34
	ENSMUSG00000006021	Kptn
	ENSMUSG00000006024	Napa
	ENSMUSG00000006050	Sra1
	ENSMUSG00000006056	Calcoco2
	ENSMUSG00000006057	Atp5g1
	ENSMUSG00000006058	Snf8
	ENSMUSG00000006095	Tbcb
	ENSMUSG00000006127	Inpp5k
	ENSMUSG00000006134	Crkl
	ENSMUSG00000006143	Upk3bl
	ENSMUSG00000006154	Eps8l1
	ENSMUSG00000006169	Clint1
	ENSMUSG00000006179	Prss16
	ENSMUSG00000006191	Cdkal1
	ENSMUSG00000006204	5430419D17Rik
	ENSMUSG00000006205	Htra1
	ENSMUSG00000006215	Zbtb17
	ENSMUSG00000006216	Clcnkb
	ENSMUSG00000006218	Fam131c
	ENSMUSG00000006219	Fblim1
	ENSMUSG00000006221	Hspb7
	ENSMUSG00000006235	Epor
	ENSMUSG00000006241	Ccdc159
	ENSMUSG00000006262	Mob1b
	ENSMUSG00000006269	Atp6v1b1
	ENSMUSG00000006270	Vax1
	ENSMUSG00000006273	Atp6v1b2
	ENSMUSG00000006276	Eps15l1
	ENSMUSG00000006281	Tep1
	ENSMUSG00000006288	Ttc5
	ENSMUSG00000006289	Osgep
	ENSMUSG00000006299	Aamp
	ENSMUSG00000006301	Tmbim1
	ENSMUSG00000006304	Arpc2
	ENSMUSG00000006307	Wbp7
	ENSMUSG00000006310	Zbtb32
	ENSMUSG00000006311	Etv2
	ENSMUSG00000006313	Upk1a
	ENSMUSG00000006315	Tmem147
	ENSMUSG00000006333	Rps9
	ENSMUSG00000006335	Tfpt
	ENSMUSG00000006342	Susd2
	ENSMUSG00000006344	Ggt5
	ENSMUSG00000006345	Ggt1
	ENSMUSG00000006356	Crip2
	ENSMUSG00000006360	Crip1
	ENSMUSG00000006362	Cbfa2t3
	ENSMUSG00000006369	Fbln1
	ENSMUSG00000006378	Gcat
	ENSMUSG00000006386	Tek
	ENSMUSG00000006389	Mpl
	ENSMUSG00000006390	Elovl1
	ENSMUSG00000006392	Med8
	ENSMUSG00000006395	Hyi
	ENSMUSG00000006398	Cdc20
	ENSMUSG00000006403	Adamts4
	ENSMUSG00000006411	Pvrl4
	ENSMUSG00000006412	Pfdn2
	ENSMUSG00000006418	Rnf114
	ENSMUSG00000006435	Neurl1a
	ENSMUSG00000006442	Srm
	ENSMUSG00000006445	Epha2
	ENSMUSG00000006456	Rbm14
	ENSMUSG00000006457	Actn3
	ENSMUSG00000006462	A530013C23Rik
	ENSMUSG00000006463	Zdhhc24
	ENSMUSG00000006464	Bbs1
	ENSMUSG00000006469	Slc34a3
	ENSMUSG00000006471	Ndor1
	ENSMUSG00000006476	Nsmf
	ENSMUSG00000006488	Prl7a1
	ENSMUSG00000006490	Prl8a9
	ENSMUSG00000006494	Pdk1
	ENSMUSG00000006498	Ptbp1
	ENSMUSG00000006517	Mvd
	ENSMUSG00000006519	Cyba
	ENSMUSG00000006522	Itih3
	ENSMUSG00000006526	Tmem110
	ENSMUSG00000006527	Sfmbt1
	ENSMUSG00000006529	Itih1
	ENSMUSG00000006538	Ihh
	ENSMUSG00000006542	Prkag3
	ENSMUSG00000006546	Cryba2
	ENSMUSG00000006567	Atp7b
	ENSMUSG00000006570	Defb2
	ENSMUSG00000006574	Slc4a1
	ENSMUSG00000006575	Rundc3a
	ENSMUSG00000006576	Slc4a3
	ENSMUSG00000006585	Cdt1
	ENSMUSG00000006586	Runx1t1
	ENSMUSG00000006587	Snai3
	ENSMUSG00000006589	Aprt
	ENSMUSG00000006599	Gtf2h1
	ENSMUSG00000006611	Hfe
	ENSMUSG00000006638	Abhd1
	ENSMUSG00000006641	Slc5a6
	ENSMUSG00000006642	Tcf23
	ENSMUSG00000006649	Nphs1
	ENSMUSG00000006651	Aplp1
	ENSMUSG00000006673	Qrich1
	ENSMUSG00000006675	P4htm
	ENSMUSG00000006676	Usp19
	ENSMUSG00000006699	Cdc42
	ENSMUSG00000006705	Pknox1
	ENSMUSG00000006711	D130043K22Rik
	ENSMUSG00000006715	Gmnn
	ENSMUSG00000006717	Acot13
	ENSMUSG00000006720	Zfp184
	ENSMUSG00000006724	Cyp27b1
	ENSMUSG00000006728	Cdk4
	ENSMUSG00000006731	B4galnt1
	ENSMUSG00000006732	Mettl1
	ENSMUSG00000006736	Tspan31
	ENSMUSG00000006740	Kif5b
	ENSMUSG00000006763	Saal1
	ENSMUSG00000006764	Tph2
	ENSMUSG00000006777	Krt23
	ENSMUSG00000006782	Cnp
	ENSMUSG00000006784	Ttc25
	ENSMUSG00000006800	Sulf2
	ENSMUSG00000006818	Sod2
	ENSMUSG00000006850	Tmco6
	ENSMUSG00000006906	Stambp
	ENSMUSG00000006920	Ezh1
	ENSMUSG00000006930	Hap1
	ENSMUSG00000006931	Leprel4
	ENSMUSG00000006932	Ctnnb1
	ENSMUSG00000006941	Eif1b
	ENSMUSG00000006948	Klk4
	ENSMUSG00000006958	Chrd
	ENSMUSG00000006998	Psmd2
	ENSMUSG00000007021	Syngr3
	ENSMUSG00000007029	Vars
	ENSMUSG00000007030	Vwa7
	ENSMUSG00000007033	Hspa1l
	ENSMUSG00000007034	Slc44a4
	ENSMUSG00000007035	Msh5
	ENSMUSG00000007036	Abhd16a
	ENSMUSG00000007038	Neu1
	ENSMUSG00000007039	Ddah2
	ENSMUSG00000007041	Clic1
	ENSMUSG00000007050	Lsm2
	ENSMUSG00000007080	Pole
	ENSMUSG00000007097	Atp1a2
	ENSMUSG00000007107	Atp1a4
	ENSMUSG00000007122	Casq1
	ENSMUSG00000007207	Stx1a
	ENSMUSG00000007209	Ceacam9
	ENSMUSG00000007216	Zfp775
	ENSMUSG00000007279	Scube2
	ENSMUSG00000007338	Mrpl49
	ENSMUSG00000007379	Dennd2c
	ENSMUSG00000007411	Mark3
	ENSMUSG00000007415	Gatad1
	ENSMUSG00000007440	Pcdhac1
	ENSMUSG00000007457	2310003L06Rik
	ENSMUSG00000007458	M6pr
	ENSMUSG00000007476	Lrrc8a
	ENSMUSG00000007480	Mc5r
	ENSMUSG00000007564	Ppp2r1a
	ENSMUSG00000007570	Fance
	ENSMUSG00000007589	Tinf2
	ENSMUSG00000007591	Tssk4
	ENSMUSG00000007594	Hapln4
	ENSMUSG00000007603	Dus3l
	ENSMUSG00000007610	Gtpbp3
	ENSMUSG00000007613	Tgfbr1
	ENSMUSG00000007617	Homer1
	ENSMUSG00000007646	Rad51c
	ENSMUSG00000007653	Gabrb2
	ENSMUSG00000007655	Cav1
	ENSMUSG00000007656	Arpp19
	ENSMUSG00000007659	Bcl2l1
	ENSMUSG00000007670	Khsrp
	ENSMUSG00000007682	Dio2
	ENSMUSG00000007721	Ccdc124
	ENSMUSG00000007739	Cct4
	ENSMUSG00000007777	0610009B22Rik
	ENSMUSG00000007783	Cpt1c
	ENSMUSG00000007805	Twist2
	ENSMUSG00000007812	Zfp655
	ENSMUSG00000007815	Rhoa
	ENSMUSG00000007817	Zmiz1
	ENSMUSG00000007827	Ankrd26
	ENSMUSG00000007833	Aldh16a1
	ENSMUSG00000007836	Hnrnpa0
	ENSMUSG00000007837	Prrg2
	ENSMUSG00000007850	Hnrnph1
	ENSMUSG00000007867	Ift43
	ENSMUSG00000007872	Id3
	ENSMUSG00000007877	Tcap
	ENSMUSG00000007880	Arid1a
	ENSMUSG00000007888	Crlf1
	ENSMUSG00000007891	Ctsd
	ENSMUSG00000007892	Rplp1
	ENSMUSG00000007907	Cabs1
	ENSMUSG00000007908	Hmgcll1
	ENSMUSG00000007944	Ttc9b
	ENSMUSG00000007946	Phox2a
	ENSMUSG00000007950	Abhd8
	ENSMUSG00000007987	Rabl5
	ENSMUSG00000007989	Fzd3
	ENSMUSG00000008028	1700008O03Rik
	ENSMUSG00000008036	Ap2s1
	ENSMUSG00000008090	Fgfrl1
	ENSMUSG00000008129	4930432K21Rik
	ENSMUSG00000008136	Fhl2
	ENSMUSG00000008140	Emc10
	ENSMUSG00000008153	Clstn3
	ENSMUSG00000008167	Fbxw9
	ENSMUSG00000008193	Spib
	ENSMUSG00000008200	Fnbp4
	ENSMUSG00000008206	Cers4
	ENSMUSG00000008226	Scrn3
	ENSMUSG00000008301	Phax
	ENSMUSG00000008305	Tle1
	ENSMUSG00000008307	1700109H08Rik
	ENSMUSG00000008318	Relt
	ENSMUSG00000008333	Snrpb2
	ENSMUSG00000008348	Ubc
	ENSMUSG00000008373	Prpf31
	ENSMUSG00000008384	Sertad1
	ENSMUSG00000008393	Carhsp1
	ENSMUSG00000008398	Elk3
	ENSMUSG00000008429	Herpud2
	ENSMUSG00000008435	Rdh13
	ENSMUSG00000008438	Adam21
	ENSMUSG00000008450	Nutf2
	ENSMUSG00000008461	Fut1
	ENSMUSG00000008475	Arpc5
	ENSMUSG00000008482	Rnf151
	ENSMUSG00000008489	Elavl2
	ENSMUSG00000008496	Pou2f2
	ENSMUSG00000008540	Mgst1
	ENSMUSG00000008575	Nfib
	ENSMUSG00000008590	Htr3b
	ENSMUSG00000008601	Rab25
	ENSMUSG00000008604	Ubqln4
	ENSMUSG00000008658	Rbfox1
	ENSMUSG00000008668	Rps18
	ENSMUSG00000008683	Rps15a
	ENSMUSG00000008690	Ncaph2
	ENSMUSG00000008730	Hipk1
	ENSMUSG00000008734	Gprc5b
	ENSMUSG00000008763	Man1a2
	ENSMUSG00000008789	Ceacam5
	ENSMUSG00000008813	Tppp2
	ENSMUSG00000008822	Acyp1
	ENSMUSG00000008843	Cldn13
	ENSMUSG00000008845	Cd163
	ENSMUSG00000008855	Hdac5
	ENSMUSG00000008859	Rala
	ENSMUSG00000008874	Clec3a
	ENSMUSG00000008892	Vdac3
	ENSMUSG00000008932	Slc1a7
	ENSMUSG00000008958	Vps72
	ENSMUSG00000008976	Gabpa
	ENSMUSG00000008999	Bmp7
	ENSMUSG00000009013	Dynll1
	ENSMUSG00000009030	Pdcl
	ENSMUSG00000009035	Tmem184b
	ENSMUSG00000009047	Gm5965
	ENSMUSG00000009070	Rtdr1
	ENSMUSG00000009073	Nf2
	ENSMUSG00000009075	Cabp7
	ENSMUSG00000009076	Zmat5
	ENSMUSG00000009079	Ewsr1
	ENSMUSG00000009090	Ap1b1
	ENSMUSG00000009092	Derl3
	ENSMUSG00000009093	Gstt4
	ENSMUSG00000009097	Tbx1
	ENSMUSG00000009108	Gnat2
	ENSMUSG00000009112	Bcl2l13
	ENSMUSG00000009114	2610028H24Rik
	ENSMUSG00000009115	Spatc1l
	ENSMUSG00000009145	Dqx1
	ENSMUSG00000009185	Ccl8
	ENSMUSG00000009207	Lnp
	ENSMUSG00000009210	2310007L24Rik
	ENSMUSG00000009214	Tmem8c
	ENSMUSG00000009216	Fam163b
	ENSMUSG00000009246	Trpm5
	ENSMUSG00000009248	Ascl2
	ENSMUSG00000009281	Rarres2
	ENSMUSG00000009291	Pttg1ip
	ENSMUSG00000009292	Trpm2
	ENSMUSG00000009293	Ube2g2
	ENSMUSG00000009350	Mpo
	ENSMUSG00000009356	Lpo
	ENSMUSG00000009376	Met
	ENSMUSG00000009378	Slc16a12
	ENSMUSG00000009394	Syn2
	ENSMUSG00000009418	Nav1
	ENSMUSG00000009470	Tnpo1
	ENSMUSG00000009471	Myod1
	ENSMUSG00000009487	Otog
	ENSMUSG00000009535	Rnmt
	ENSMUSG00000009545	Kcnq1
	ENSMUSG00000009549	Srp14
	ENSMUSG00000009551	6330409D20Rik
	ENSMUSG00000009555	Cdk9
	ENSMUSG00000009563	Tor2a
	ENSMUSG00000009566	Fpgs
	ENSMUSG00000009569	Mkl2
	ENSMUSG00000009575	Cbx5
	ENSMUSG00000009580	Odam
	ENSMUSG00000009585	Apobec3
	ENSMUSG00000009588	St6galnac1
	ENSMUSG00000009614	Sardh
	ENSMUSG00000009621	Vav2
	ENSMUSG00000009628	Tex15
	ENSMUSG00000009630	Ppp2cb
	ENSMUSG00000009633	G0s2
	ENSMUSG00000009640	Dmap1
	ENSMUSG00000009646	Pla2g12b
	ENSMUSG00000009647	Mcu
	ENSMUSG00000009654	Oit3
	ENSMUSG00000009681	Bcr
	ENSMUSG00000009687	Fxyd5
	ENSMUSG00000009733	Tfcp2
	ENSMUSG00000009734	Pou6f2
	ENSMUSG00000009739	Pou6f1
	ENSMUSG00000009741	Ubp1
	ENSMUSG00000009772	Nuak2
	ENSMUSG00000009828	Ick
	ENSMUSG00000009863	Sdhb
	ENSMUSG00000009876	Cox4i2
	ENSMUSG00000009894	Snap47
	ENSMUSG00000009900	Wnt3a
	ENSMUSG00000009905	Kdsr
	ENSMUSG00000009907	Vps4b
	ENSMUSG00000009927	Rps25
	ENSMUSG00000010021	Kif19a
	ENSMUSG00000010025	Aldh3a2
	ENSMUSG00000010044	Zmynd10
	ENSMUSG00000010045	Tmem115
	ENSMUSG00000010047	Hyal2
	ENSMUSG00000010048	Ifrd2
	ENSMUSG00000010051	Hyal1
	ENSMUSG00000010054	Tusc2
	ENSMUSG00000010057	Nprl2
	ENSMUSG00000010064	Slc38a3
	ENSMUSG00000010066	Cacna2d2
	ENSMUSG00000010067	Rassf1
	ENSMUSG00000010080	Epn3
	ENSMUSG00000010086	Rnf112
	ENSMUSG00000010095	Slc3a2
	ENSMUSG00000010097	Nxf1
	ENSMUSG00000010110	Stx5a
	ENSMUSG00000010122	Slc47a1
	ENSMUSG00000010136	Pifo
	ENSMUSG00000010142	Tnfrsf13b
	ENSMUSG00000010154	Spire2
	ENSMUSG00000010175	Prox1
	ENSMUSG00000010205	Raver1
	ENSMUSG00000010277	2610507B11Rik
	ENSMUSG00000010290	AI597479
	ENSMUSG00000010307	Tmem86a
	ENSMUSG00000010311	Optc
	ENSMUSG00000010342	Tex14
	ENSMUSG00000010358	Ifi35
	ENSMUSG00000010362	Rdm1
	ENSMUSG00000010376	Nedd8
	ENSMUSG00000010392	Gosr1
	ENSMUSG00000010406	Mrpl52
	ENSMUSG00000010435	Spaca7
	ENSMUSG00000010453	Kansl3
	ENSMUSG00000010461	Eya4
	ENSMUSG00000010476	Ebf3
	ENSMUSG00000010492	Gm16119
	ENSMUSG00000010505	Myt1
	ENSMUSG00000010517	Faf1
	ENSMUSG00000010529	Gm266
	ENSMUSG00000010538	Tsacc
	ENSMUSG00000010554	Mettl16
	ENSMUSG00000010592	Dazl
	ENSMUSG00000010601	Apol7a
	ENSMUSG00000010607	Pigyl
	ENSMUSG00000010608	Rbm25
	ENSMUSG00000010609	Psen2
	ENSMUSG00000010651	Acaa1b
	ENSMUSG00000010660	Plcd1
	ENSMUSG00000010663	Fads1
	ENSMUSG00000010721	Lmbr1
	ENSMUSG00000010751	Tnfrsf22
	ENSMUSG00000010755	Cars
	ENSMUSG00000010760	Phlda2
	ENSMUSG00000010796	Asz1
	ENSMUSG00000010797	Wnt2
	ENSMUSG00000010803	Gabra1
	ENSMUSG00000010825	Grid2ip
	ENSMUSG00000010830	Kdelr3
	ENSMUSG00000010841	1700006E09Rik
	ENSMUSG00000010911	Apip
	ENSMUSG00000010914	Pdhx
	ENSMUSG00000010936	Vac14
	ENSMUSG00000011008	Mcoln2
	ENSMUSG00000011034	Slc5a1
	ENSMUSG00000011052	1700049J03Rik
	ENSMUSG00000011096	Akt1s1
	ENSMUSG00000011114	Tbrg1
	ENSMUSG00000011118	Panx3
	ENSMUSG00000011148	Adssl1
	ENSMUSG00000011154	1700026D08Rik
	ENSMUSG00000011158	Brf1
	ENSMUSG00000011171	Vipr2
	ENSMUSG00000011179	Odc1
	ENSMUSG00000011254	Thg1l
	ENSMUSG00000011256	Adam19
	ENSMUSG00000011257	Pabpc4
	ENSMUSG00000011263	Exoc3l2
	ENSMUSG00000011267	Zfp296
	ENSMUSG00000011305	Plin5
	ENSMUSG00000011306	Sugp1
	ENSMUSG00000011349	Dmrtc2
	ENSMUSG00000011350	Gm5893
	ENSMUSG00000011382	Dhdh
	ENSMUSG00000011427	Zfp790
	ENSMUSG00000011463	Cpb1
	ENSMUSG00000011486	Slc25a41
	ENSMUSG00000011589	Fsd1
	ENSMUSG00000011632	Pinlyp
	ENSMUSG00000011658	Fuz
	ENSMUSG00000011751	Sptbn4
	ENSMUSG00000011752	Pgam1
	ENSMUSG00000011831	Evi5
	ENSMUSG00000011832	Evi5l
	ENSMUSG00000011837	Snapc2
	ENSMUSG00000011877	Git1
	ENSMUSG00000011884	Gltp
	ENSMUSG00000011958	Bnip2
	ENSMUSG00000011960	Ccnt1
	ENSMUSG00000012017	Scarf2
	ENSMUSG00000012042	4930579F01Rik
	ENSMUSG00000012076	Brms1l
	ENSMUSG00000012114	Med15
	ENSMUSG00000012117	Dhdds
	ENSMUSG00000012123	Aim1l
	ENSMUSG00000012126	Ubxn11
	ENSMUSG00000012187	Mogat1
	ENSMUSG00000012211	Tex22
	ENSMUSG00000012282	Wnt8a
	ENSMUSG00000012296	Tjap1
	ENSMUSG00000012350	Ehf
	ENSMUSG00000012396	Nanog
	ENSMUSG00000012405	Rpl15
	ENSMUSG00000012422	Tmem167
	ENSMUSG00000012428	Steap4
	ENSMUSG00000012429	Mplkip
	ENSMUSG00000012443	Kif11
	ENSMUSG00000012483	Rpa3
	ENSMUSG00000012519	Mlkl
	ENSMUSG00000012520	Phox2b
	ENSMUSG00000012535	Tnpo3
	ENSMUSG00000012609	Ttll5
	ENSMUSG00000012640	Zfp715
	ENSMUSG00000012705	Retn
	ENSMUSG00000012777	Acpt
	ENSMUSG00000012819	Cdh23
	ENSMUSG00000012848	Rps5
	ENSMUSG00000012889	Podnl1
	ENSMUSG00000013033	Lphn1
	ENSMUSG00000013076	Amotl1
	ENSMUSG00000013083	2200002J24Rik
	ENSMUSG00000013089	Etv5
	ENSMUSG00000013091	Tmem190
	ENSMUSG00000013150	Gfod2
	ENSMUSG00000013155	Enkd1
	ENSMUSG00000013158	4933405L10Rik
	ENSMUSG00000013160	Atp6v0d1
	ENSMUSG00000013236	Ptprs
	ENSMUSG00000013275	Slc41a1
	ENSMUSG00000013338	Fer1l4
	ENSMUSG00000013353	4931406B18Rik
	ENSMUSG00000013367	Iglon5
	ENSMUSG00000013415	Igf2bp1
	ENSMUSG00000013418	B4galnt2
	ENSMUSG00000013419	Zfp651
	ENSMUSG00000013465	Nelfb
	ENSMUSG00000013483	Card14
	ENSMUSG00000013495	Tmem175
	ENSMUSG00000013523	Bcas1
	ENSMUSG00000013539	Tango2
	ENSMUSG00000013562	4833413E03Rik
	ENSMUSG00000013584	Aldh1a2
	ENSMUSG00000013593	Ndufs2
	ENSMUSG00000013611	Snx31
	ENSMUSG00000013622	Atraid
	ENSMUSG00000013629	Cad
	ENSMUSG00000013643	Lypd8
	ENSMUSG00000013646	Sh3bp5l
	ENSMUSG00000013653	1810065E05Rik
	ENSMUSG00000013662	Atad1
	ENSMUSG00000013663	Pten
	ENSMUSG00000013668	4933402N03Rik
	ENSMUSG00000013698	Pea15a
	ENSMUSG00000013701	Timm23
	ENSMUSG00000013707	Tnfaip8l2
	ENSMUSG00000013736	Trnt1
	ENSMUSG00000013766	Ly6g6e
	ENSMUSG00000013787	Ehmt2
	ENSMUSG00000013822	Elof1
	ENSMUSG00000013833	Med16
	ENSMUSG00000013846	St3gal1
	ENSMUSG00000013858	Tmem259
	ENSMUSG00000013878	Rnf170
	ENSMUSG00000013921	Clip3
	ENSMUSG00000013928	Thap8
	ENSMUSG00000013936	Myl2
	ENSMUSG00000013973	Dedd
	ENSMUSG00000013974	1810033B17Rik
	ENSMUSG00000013997	Nit1
	ENSMUSG00000014030	Pax5
	ENSMUSG00000014039	Prdm15
	ENSMUSG00000014074	Rnf168
	ENSMUSG00000014075	Tctex1d2
	ENSMUSG00000014077	Chp1
	ENSMUSG00000014104	Sval2
	ENSMUSG00000014158	Trpv4
	ENSMUSG00000014164	Klhl3
	ENSMUSG00000014177	Tvp23b
	ENSMUSG00000014195	Dnajc7
	ENSMUSG00000014198	Zfp385c
	ENSMUSG00000014226	Cacybp
	ENSMUSG00000014232	Cluap1
	ENSMUSG00000014243	Zswim7
	ENSMUSG00000014245	Pigl
	ENSMUSG00000014294	Ndufa2
	ENSMUSG00000014301	Pam16
	ENSMUSG00000014303	Glis2
	ENSMUSG00000014313	Cox6c
	ENSMUSG00000014329	Bicc1
	ENSMUSG00000014349	Ube2z
	ENSMUSG00000014351	Gip
	ENSMUSG00000014353	Tmem87b
	ENSMUSG00000014355	Anapc1
	ENSMUSG00000014361	Mertk
	ENSMUSG00000014402	Tsg101
	ENSMUSG00000014418	Hps5
	ENSMUSG00000014426	Map3k4
	ENSMUSG00000014444	Piezo1
	ENSMUSG00000014453	Blk
	ENSMUSG00000014470	Rnf166
	ENSMUSG00000014496	Ankrd28
	ENSMUSG00000014498	Ankrd52
	ENSMUSG00000014503	Pkd2l2
	ENSMUSG00000014504	Srp19
	ENSMUSG00000014529	4930511M11Rik
	ENSMUSG00000014542	Clec4f
	ENSMUSG00000014543	Klra17
	ENSMUSG00000014547	Wdfy2
	ENSMUSG00000014550	Zfyve20
	ENSMUSG00000014551	Mrps25
	ENSMUSG00000014554	Dguok
	ENSMUSG00000014592	Camta1
	ENSMUSG00000014599	Csf1
	ENSMUSG00000014601	Strip1
	ENSMUSG00000014602	Kif1a
	ENSMUSG00000014603	Alx3
	ENSMUSG00000014606	Slc25a11
	ENSMUSG00000014609	Chrne
	ENSMUSG00000014633	Cmc2
	ENSMUSG00000014668	Chfr
	ENSMUSG00000014686	Ceacam16
	ENSMUSG00000014704	Hoxa2
	ENSMUSG00000014725	Adam28
	ENSMUSG00000014747	Ankrd53
	ENSMUSG00000014748	Tex261
	ENSMUSG00000014763	Fam120b
	ENSMUSG00000014767	Tbp
	ENSMUSG00000014769	Psmb1
	ENSMUSG00000014771	Pdcd2
	ENSMUSG00000014773	Dll1
	ENSMUSG00000014776	Nol3
	ENSMUSG00000014778	Fhod1
	ENSMUSG00000014782	Plekhg4
	ENSMUSG00000014786	Slc9a5
	ENSMUSG00000014791	Elmo3
	ENSMUSG00000014813	Stc1
	ENSMUSG00000014837	4931428F04Rik
	ENSMUSG00000014846	Tppp3
	ENSMUSG00000014850	Msh3
	ENSMUSG00000014852	Adamts13
	ENSMUSG00000014856	Tmem208
	ENSMUSG00000014859	E2f4
	ENSMUSG00000014867	Surf4
	ENSMUSG00000014873	Surf2
	ENSMUSG00000014905	Dnajb9
	ENSMUSG00000014907	Naf1
	ENSMUSG00000014932	Yes1
	ENSMUSG00000014956	Ppp1cb
	ENSMUSG00000014959	Gorasp2
	ENSMUSG00000014980	Tsen15
	ENSMUSG00000015001	Oc90
	ENSMUSG00000015002	Efr3a
	ENSMUSG00000015013	Trappc2l
	ENSMUSG00000015016	Acsf3
	ENSMUSG00000015023	Ddx19a
	ENSMUSG00000015027	Galns
	ENSMUSG00000015053	Gata2
	ENSMUSG00000015083	C8g
	ENSMUSG00000015085	Entpd2
	ENSMUSG00000015087	Rabl6
	ENSMUSG00000015090	Ptgds
	ENSMUSG00000015092	Edf1
	ENSMUSG00000015093	Clic3
	ENSMUSG00000015094	Npdc1
	ENSMUSG00000015095	Fbxw5
	ENSMUSG00000015112	Slc25a13
	ENSMUSG00000015120	Ube2i
	ENSMUSG00000015126	Tsr3
	ENSMUSG00000015127	Unkl
	ENSMUSG00000015133	Lrrk1
	ENSMUSG00000015134	Aldh1a3
	ENSMUSG00000015143	Actn1
	ENSMUSG00000015149	Sirt2
	ENSMUSG00000015165	Hnrnpl
	ENSMUSG00000015176	Nolc1
	ENSMUSG00000015189	Casd1
	ENSMUSG00000015202	Cnksr3
	ENSMUSG00000015222	Map2
	ENSMUSG00000015224	Cyp2j9
	ENSMUSG00000015242	Nipsnap3a
	ENSMUSG00000015243	Abca1
	ENSMUSG00000015247	Nipsnap3b
	ENSMUSG00000015305	Sash1
	ENSMUSG00000015312	Gadd45b
	ENSMUSG00000015314	Slamf6
	ENSMUSG00000015316	Slamf1
	ENSMUSG00000015335	Zdhhc12
	ENSMUSG00000015337	Endog
	ENSMUSG00000015341	Golga7
	ENSMUSG00000015354	Pcolce2
	ENSMUSG00000015355	Cd48
	ENSMUSG00000015357	Clpx
	ENSMUSG00000015363	Trabd
	ENSMUSG00000015365	Mov10l1
	ENSMUSG00000015377	Dennd6b
	ENSMUSG00000015396	Cd83
	ENSMUSG00000015437	Gzmb
	ENSMUSG00000015441	Gzmf
	ENSMUSG00000015443	Gzmn
	ENSMUSG00000015451	C4a
	ENSMUSG00000015452	Ager
	ENSMUSG00000015461	Atf6b
	ENSMUSG00000015467	Egfl8
	ENSMUSG00000015468	Notch4
	ENSMUSG00000015474	Ppt2
	ENSMUSG00000015476	Prrt1
	ENSMUSG00000015478	Rnf5
	ENSMUSG00000015484	Fam163a
	ENSMUSG00000015488	Cacfd1
	ENSMUSG00000015501	Hivep2
	ENSMUSG00000015519	2310057J18Rik
	ENSMUSG00000015522	Arnt
	ENSMUSG00000015533	Itga2
	ENSMUSG00000015536	Mocs2
	ENSMUSG00000015542	Nat9
	ENSMUSG00000015568	Lpl
	ENSMUSG00000015575	Atp6v0e
	ENSMUSG00000015579	Nkx2-5
	ENSMUSG00000015597	Zfp318
	ENSMUSG00000015599	Ttbk1
	ENSMUSG00000015605	Srf
	ENSMUSG00000015619	Gata3
	ENSMUSG00000015627	Gata5
	ENSMUSG00000015647	Lama5
	ENSMUSG00000015652	Steap1
	ENSMUSG00000015653	Steap2
	ENSMUSG00000015656	Hspa8
	ENSMUSG00000015659	Serac1
	ENSMUSG00000015671	Psma2
	ENSMUSG00000015672	Mrpl32
	ENSMUSG00000015697	Setdb1
	ENSMUSG00000015702	Anxa9
	ENSMUSG00000015709	Arnt2
	ENSMUSG00000015711	Prune
	ENSMUSG00000015714	Cers2
	ENSMUSG00000015721	Nlrp5
	ENSMUSG00000015733	Capza2
	ENSMUSG00000015745	Plekho1
	ENSMUSG00000015747	Vps45
	ENSMUSG00000015748	Prpf3
	ENSMUSG00000015749	Anp32e
	ENSMUSG00000015750	Aph1a
	ENSMUSG00000015755	Tab2
	ENSMUSG00000015757	Ppil4
	ENSMUSG00000015759	Cnih
	ENSMUSG00000015766	Eps8
	ENSMUSG00000015776	Med22
	ENSMUSG00000015787	Abo
	ENSMUSG00000015790	Surf1
	ENSMUSG00000015804	Med28
	ENSMUSG00000015806	Qdpr
	ENSMUSG00000015812	Gnrh1
	ENSMUSG00000015829	Tnr
	ENSMUSG00000015837	Sqstm1
	ENSMUSG00000015839	Nfe2l2
	ENSMUSG00000015843	Rxrg
	ENSMUSG00000015846	Rxra
	ENSMUSG00000015850	Adamtsl4
	ENSMUSG00000015852	Fcrls
	ENSMUSG00000015854	Cd5l
	ENSMUSG00000015869	Prpsap1
	ENSMUSG00000015879	Fam184b
	ENSMUSG00000015880	Ncapg
	ENSMUSG00000015882	Lcorl
	ENSMUSG00000015889	Lta4h
	ENSMUSG00000015890	Amdhd1
	ENSMUSG00000015932	Dstn
	ENSMUSG00000015937	H2afy
	ENSMUSG00000015942	Gtf2ird2
	ENSMUSG00000015943	Bola1
	ENSMUSG00000015944	Gatsl2
	ENSMUSG00000015947	Fcgr1
	ENSMUSG00000015950	Ncf1
	ENSMUSG00000015957	Wnt11
	ENSMUSG00000015961	Adss
	ENSMUSG00000015962	1700016C15Rik
	ENSMUSG00000015966	Il17rb
	ENSMUSG00000015968	Cacna1d
	ENSMUSG00000015970	Chdh
	ENSMUSG00000015971	Actr8
	ENSMUSG00000015980	Lrrc27
	ENSMUSG00000015981	Stk32c
	ENSMUSG00000015994	Fnta
	ENSMUSG00000016018	Skiv2l2
	ENSMUSG00000016024	Lbp
	ENSMUSG00000016028	Celsr1
	ENSMUSG00000016087	Fli1
	ENSMUSG00000016128	Stard13
	ENSMUSG00000016179	Camk1g
	ENSMUSG00000016181	Diexf
	ENSMUSG00000016194	Hsd11b1
	ENSMUSG00000016200	Syt14
	ENSMUSG00000016206	H2-M3
	ENSMUSG00000016252	Atp5e
	ENSMUSG00000016253	Nelfcd
	ENSMUSG00000016255	Tubb1
	ENSMUSG00000016256	Ctsz
	ENSMUSG00000016257	Slmo2
	ENSMUSG00000016262	Sertad4
	ENSMUSG00000016283	H2-M2
	ENSMUSG00000016344	Ppdpf
	ENSMUSG00000016346	Kcnq2
	ENSMUSG00000016349	Eef1a2
	ENSMUSG00000016356	Col20a1
	ENSMUSG00000016386	Mpped2
	ENSMUSG00000016458	Wt1
	ENSMUSG00000016477	E2f3
	ENSMUSG00000016481	Cr1l
	ENSMUSG00000016487	Ppfibp1
	ENSMUSG00000016493	Cd46
	ENSMUSG00000016494	Cd34
	ENSMUSG00000016495	Plgrkt
	ENSMUSG00000016496	Cd274
	ENSMUSG00000016498	Pdcd1lg2
	ENSMUSG00000016503	Gtf3a
	ENSMUSG00000016510	Mtif3
	ENSMUSG00000016520	Lnx2
	ENSMUSG00000016524	Il19
	ENSMUSG00000016526	Dyrk3
	ENSMUSG00000016528	Mapkapk2
	ENSMUSG00000016529	Il10
	ENSMUSG00000016541	Atxn10
	ENSMUSG00000016552	Foxred2
	ENSMUSG00000016554	Eif3d
	ENSMUSG00000016559	H3f3b
	ENSMUSG00000016619	Nup50
	ENSMUSG00000016624	Phf21b
	ENSMUSG00000016626	Nlrp14
	ENSMUSG00000016637	Ift27
	ENSMUSG00000016664	Pacsin2
	ENSMUSG00000016756	Cmah
	ENSMUSG00000016757	Ttll12
	ENSMUSG00000016758	Bik
	ENSMUSG00000016763	Scube1
	ENSMUSG00000016831	Tox4
	ENSMUSG00000016833	Mrps18c
	ENSMUSG00000016918	Sulf1
	ENSMUSG00000016921	Srsf6
	ENSMUSG00000016933	Plcg1
	ENSMUSG00000016940	Kctd2
	ENSMUSG00000016942	Tmprss6
	ENSMUSG00000016946	Kctd5
	ENSMUSG00000016982	Pom121l2
	ENSMUSG00000016984	Etaa1
	ENSMUSG00000016995	Matn4
	ENSMUSG00000016998	Svs4
	ENSMUSG00000017000	Svs6
	ENSMUSG00000017002	Slpi
	ENSMUSG00000017003	Svs3a
	ENSMUSG00000017004	Svs5
	ENSMUSG00000017007	Rbpjl
	ENSMUSG00000017009	Sdc4
	ENSMUSG00000017049	Ccdc70
	ENSMUSG00000017064	Prl5a1
	ENSMUSG00000017119	Nbr1
	ENSMUSG00000017132	Cyth1
	ENSMUSG00000017144	Rnd3
	ENSMUSG00000017146	Brca1
	ENSMUSG00000017165	Gast
	ENSMUSG00000017167	Cntnap1
	ENSMUSG00000017176	Nt5c3b
	ENSMUSG00000017188	Coa3
	ENSMUSG00000017195	Zpbp2
	ENSMUSG00000017204	Gsdma
	ENSMUSG00000017210	Med24
	ENSMUSG00000017211	Gsdma2
	ENSMUSG00000017221	Psmd3
	ENSMUSG00000017264	Exosc10
	ENSMUSG00000017286	Glod4
	ENSMUSG00000017288	Vps53
	ENSMUSG00000017291	Taok1
	ENSMUSG00000017299	Dnttip1
	ENSMUSG00000017300	Tnnc2
	ENSMUSG00000017307	Acot8
	ENSMUSG00000017309	Cd300lg
	ENSMUSG00000017310	Spint4
	ENSMUSG00000017311	Pyy
	ENSMUSG00000017314	Mpp2
	ENSMUSG00000017316	Ppy
	ENSMUSG00000017344	Vtn
	ENSMUSG00000017376	Nlk
	ENSMUSG00000017386	Traf4
	ENSMUSG00000017390	Aldoc
	ENSMUSG00000017400	Stac2
	ENSMUSG00000017404	Rpl19
	ENSMUSG00000017405	Nek8
	ENSMUSG00000017412	Cacnb4
	ENSMUSG00000017417	Plxdc1
	ENSMUSG00000017418	Arl5b
	ENSMUSG00000017421	Zfp207
	ENSMUSG00000017428	Psmd11
	ENSMUSG00000017446	C1qtnf1
	ENSMUSG00000017453	Pipox
	ENSMUSG00000017466	Timp2
	ENSMUSG00000017478	Zc3h18
	ENSMUSG00000017485	Top2b
	ENSMUSG00000017491	Rarb
	ENSMUSG00000017493	Igfbp4
	ENSMUSG00000017499	Cdc6
	ENSMUSG00000017548	Suz12
	ENSMUSG00000017550	Atad5
	ENSMUSG00000017561	Crlf3
	ENSMUSG00000017588	Krt27
	ENSMUSG00000017607	Tns4
	ENSMUSG00000017615	Tnfaip1
	ENSMUSG00000017631	Abr
	ENSMUSG00000017639	Rab11fip4
	ENSMUSG00000017652	Cd40
	ENSMUSG00000017664	Slc35c2
	ENSMUSG00000017667	Zfp334
	ENSMUSG00000017670	Elmo2
	ENSMUSG00000017677	Wsb1
	ENSMUSG00000017679	Ttpal
	ENSMUSG00000017686	Rhot1
	ENSMUSG00000017688	Hnf4g
	ENSMUSG00000017692	Rhbdl3
	ENSMUSG00000017697	Ada
	ENSMUSG00000017707	Serinc3
	ENSMUSG00000017713	Tha1
	ENSMUSG00000017715	Pgs1
	ENSMUSG00000017716	Birc5
	ENSMUSG00000017718	Afmid
	ENSMUSG00000017720	Trp53tg5
	ENSMUSG00000017721	Pigt
	ENSMUSG00000017723	Wfdc2
	ENSMUSG00000017724	Etv4
	ENSMUSG00000017733	Eppin
	ENSMUSG00000017734	Dbndd2
	ENSMUSG00000017737	Mmp9
	ENSMUSG00000017740	Slc12a5
	ENSMUSG00000017747	Ghdc
	ENSMUSG00000017754	Pltp
	ENSMUSG00000017756	Slc12a7
	ENSMUSG00000017760	Ctsa
	ENSMUSG00000017764	Zswim1
	ENSMUSG00000017765	Slc12a4
	ENSMUSG00000017767	Spata25
	ENSMUSG00000017774	Myo1c
	ENSMUSG00000017776	Crk
	ENSMUSG00000017778	Cox7c
	ENSMUSG00000017781	Pitpna
	ENSMUSG00000017801	Mlx
	ENSMUSG00000017802	Fam134c
	ENSMUSG00000017817	Jph2
	ENSMUSG00000017830	Dhx58
	ENSMUSG00000017831	Rab5a
	ENSMUSG00000017832	Hspb9
	ENSMUSG00000017837	Nkiras2
	ENSMUSG00000017843	Ppp2r5c
	ENSMUSG00000017858	Ift52
	ENSMUSG00000017861	Mybl2
	ENSMUSG00000017868	Sgk2
	ENSMUSG00000017897	Eya2
	ENSMUSG00000017914	BC034902
	ENSMUSG00000017922	Prl3c1
	ENSMUSG00000017929	B4galt5
	ENSMUSG00000017943	Gdap1l1
	ENSMUSG00000017950	Hnf4a
	ENSMUSG00000017969	Ptgis
	ENSMUSG00000017978	Cadps2
	ENSMUSG00000017999	Ddx27
	ENSMUSG00000018001	Cyth3
	ENSMUSG00000018008	Cyth4
	ENSMUSG00000018012	Rac3
	ENSMUSG00000018040	Rrp7a
	ENSMUSG00000018042	Cyb5r3
	ENSMUSG00000018068	Ints2
	ENSMUSG00000018076	Med13l
	ENSMUSG00000018102	Hist1h2bc
	ENSMUSG00000018126	Baiap2l2
	ENSMUSG00000018143	Mafk
	ENSMUSG00000018160	Med1
	ENSMUSG00000018166	Erbb3
	ENSMUSG00000018167	Stard3
	ENSMUSG00000018168	Ikzf3
	ENSMUSG00000018169	Mfng
	ENSMUSG00000018171	Vmp1
	ENSMUSG00000018189	Uchl5
	ENSMUSG00000018196	Glrx2
	ENSMUSG00000018199	Trove2
	ENSMUSG00000018209	Stk4
	ENSMUSG00000018211	Wfdc15b
	ENSMUSG00000018217	Pmp22
	ENSMUSG00000018238	Gdf9
	ENSMUSG00000018239	Zcchc10
	ENSMUSG00000018259	Prl8a2
	ENSMUSG00000018263	Tbx5
	ENSMUSG00000018286	Psmb6
	ENSMUSG00000018287	Spag7
	ENSMUSG00000018293	Pfn1
	ENSMUSG00000018322	Tomm34
	ENSMUSG00000018326	Ywhab
	ENSMUSG00000018334	Ksr1
	ENSMUSG00000018339	Gpx3
	ENSMUSG00000018340	Anxa6
	ENSMUSG00000018341	Il12rb2
	ENSMUSG00000018347	Zkscan6
	ENSMUSG00000018362	Kpna2
	ENSMUSG00000018363	Smurf2
	ENSMUSG00000018372	Cep95
	ENSMUSG00000018377	Vezf1
	ENSMUSG00000018378	Cuedc1
	ENSMUSG00000018379	Srsf1
	ENSMUSG00000018381	Abi3
	ENSMUSG00000018387	Shroom1
	ENSMUSG00000018395	Kif3a
	ENSMUSG00000018398	Sept8
	ENSMUSG00000018401	Mtmr4
	ENSMUSG00000018405	Mrm1
	ENSMUSG00000018411	Mapt
	ENSMUSG00000018412	Kansl1
	ENSMUSG00000018415	Gid4
	ENSMUSG00000018417	Myo1b
	ENSMUSG00000018425	Dhx40
	ENSMUSG00000018427	Ypel2
	ENSMUSG00000018428	Akap1
	ENSMUSG00000018433	Nol11
	ENSMUSG00000018442	Derl2
	ENSMUSG00000018446	C1qbp
	ENSMUSG00000018449	Rpain
	ENSMUSG00000018451	6330403K07Rik
	ENSMUSG00000018459	Slc13a3
	ENSMUSG00000018470	Kcnab3
	ENSMUSG00000018474	Chd3
	ENSMUSG00000018476	Kdm6b
	ENSMUSG00000018479	1700125H20Rik
	ENSMUSG00000018481	Appbp2
	ENSMUSG00000018486	Wnt9b
	ENSMUSG00000018500	Adora2b
	ENSMUSG00000018501	Ncor1
	ENSMUSG00000018507	Trpv2
	ENSMUSG00000018509	Cenpv
	ENSMUSG00000018537	Pcgf2
	ENSMUSG00000018541	Cwc25
	ENSMUSG00000018543	1700001P01Rik
	ENSMUSG00000018547	Pip4k2b
	ENSMUSG00000018548	Trim37
	ENSMUSG00000018554	Ybx2
	ENSMUSG00000018559	Ctdnep1
	ENSMUSG00000018565	Elp5
	ENSMUSG00000018566	Slc2a4
	ENSMUSG00000018567	Gabarap
	ENSMUSG00000018569	Cldn7
	ENSMUSG00000018570	2810408A11Rik
	ENSMUSG00000018572	Phf23
	ENSMUSG00000018574	Acadvl
	ENSMUSG00000018581	Dnahc11
	ENSMUSG00000018583	G3bp1
	ENSMUSG00000018585	Atox1
	ENSMUSG00000018593	Sparc
	ENSMUSG00000018599	Smcr7
	ENSMUSG00000018604	Tbx3
	ENSMUSG00000018620	Mmp20
	ENSMUSG00000018623	Mmp7
	ENSMUSG00000018634	Crhr1
	ENSMUSG00000018648	Dusp14
	ENSMUSG00000018651	Tada2a
	ENSMUSG00000018654	Ikzf1
	ENSMUSG00000018656	Fam115e
	ENSMUSG00000018659	Pnpo
	ENSMUSG00000018661	Cog1
	ENSMUSG00000018666	Cbx1
	ENSMUSG00000018669	Cdk5rap3
	ENSMUSG00000018672	Copz2
	ENSMUSG00000018677	Slc25a39
	ENSMUSG00000018678	Sp2
	ENSMUSG00000018697	Aatf
	ENSMUSG00000018698	Lhx1
	ENSMUSG00000018707	Dync1h1
	ENSMUSG00000018727	Cpsf4l
	ENSMUSG00000018733	Pex12
	ENSMUSG00000018736	Ndel1
	ENSMUSG00000018740	Slc25a35
	ENSMUSG00000018750	Zbtb4
	ENSMUSG00000018752	BC096441
	ENSMUSG00000018761	Mpdu1
	ENSMUSG00000018765	Fxr2
	ENSMUSG00000018770	Atp5g3
	ENSMUSG00000018774	Cd68
	ENSMUSG00000018776	Slc35g3
	ENSMUSG00000018796	Acsl1
	ENSMUSG00000018800	Abca5
	ENSMUSG00000018809	Smyd4
	ENSMUSG00000018819	Lsp1
	ENSMUSG00000018820	Zfyve27
	ENSMUSG00000018821	Avpi1
	ENSMUSG00000018822	Sfrp5
	ENSMUSG00000018830	Myh11
	ENSMUSG00000018841	Rad51d
	ENSMUSG00000018844	Fndc8
	ENSMUSG00000018845	Unc45b
	ENSMUSG00000018846	Pank3
	ENSMUSG00000018848	Rars
	ENSMUSG00000018849	Wwc1
	ENSMUSG00000018858	Ict1
	ENSMUSG00000018861	Fdxr
	ENSMUSG00000018862	Otop3
	ENSMUSG00000018865	Sult4a1
	ENSMUSG00000018868	Pnpla5
	ENSMUSG00000018882	Mrpl45
	ENSMUSG00000018893	Mb
	ENSMUSG00000018899	Irf1
	ENSMUSG00000018900	Slc22a5
	ENSMUSG00000018906	P4ha2
	ENSMUSG00000018907	Alox12e
	ENSMUSG00000018909	Arrb1
	ENSMUSG00000018914	Il3
	ENSMUSG00000018916	Csf2
	ENSMUSG00000018919	Tm4sf5
	ENSMUSG00000018920	Cxcl16
	ENSMUSG00000018921	Pelp1
	ENSMUSG00000018923	Med11
	ENSMUSG00000018924	Alox15
	ENSMUSG00000018925	Gm11435
	ENSMUSG00000018927	Ccl6
	ENSMUSG00000018930	Ccl4
	ENSMUSG00000018931	Gm16515
	ENSMUSG00000018932	Map2k3
	ENSMUSG00000018965	Ywhah
	ENSMUSG00000018973	Hoxb1
	ENSMUSG00000018974	Sart3
	ENSMUSG00000018983	E2f2
	ENSMUSG00000018986	Slfn3
	ENSMUSG00000018995	Nars2
	ENSMUSG00000018999	Slc35b4
	ENSMUSG00000019027	Dnahc1
	ENSMUSG00000019039	Dalrd3
	ENSMUSG00000019054	Fis1
	ENSMUSG00000019055	Plod1
	ENSMUSG00000019066	Rab3d
	ENSMUSG00000019080	Mfsd3
	ENSMUSG00000019082	Slc25a22
	ENSMUSG00000019102	Aldh3a1
	ENSMUSG00000019122	Ccl9
	ENSMUSG00000019124	Scrn1
	ENSMUSG00000019132	BC005537
	ENSMUSG00000019139	Isyna1
	ENSMUSG00000019143	Hars2
	ENSMUSG00000019146	Cacng2
	ENSMUSG00000019158	Tmem160
	ENSMUSG00000019173	Rab5c
	ENSMUSG00000019178	Styxl1
	ENSMUSG00000019179	Mdh2
[truncated: 52,500 more rows]

## Sheet: Positions
	Strain.Chromosome	Start	Stop	Orientation	Gene
	LG1	3054238	3054738	+	Gm16088
	LG1	3102058	3102167	+	Gm26206
	LG1	3205886	3207302	-	Xkr4
	LG1	3213444	3216974	-	Xkr4
	LG1	3421751	3421950	-	Xkr4
	LG1	3466643	3466744	+	Gm1992
	LG1	3513473	3513621	+	Gm1992
	LG1	3670656	3671602	-	Xkr4
	LG1	3678984	3679047	-	Gm26309
	LG1	3783841	3783902	-	Gm26010
	LG1	4343556	4350140	-	Rp1
	LG1	4351961	4352132	-	Rp1
	LG1	4352253	4352888	-	Rp1
	LG1	4360251	4360365	-	Rp1
	LG1	4491029	4492769	-	Sox17
	LG1	4493201	4493591	-	Sox17
	LG1	4493873	4493964	-	Sox17
	LG1	4495237	4496043	-	Sox17
	LG1	4496392	4496514	-	Sox17
	LG1	4529124	4529230	+	Gm22307
	LG1	4688094	4689578	-	RP23-34E15.1
	LG1	4723484	4723586	-	Gm25493
	LG1	4773406	4777006	-	Mrpl15
	LG1	4777731	4777854	-	Mrpl15
	LG1	4781428	4782508	-	Mrpl15
	LG1	4782775	4782940	-	Mrpl15
	LG1	4783760	4784307	-	Mrpl15
	LG1	4785757	4785923	-	Mrpl15
	LG1	4807981	4808175	+	Lypla1
	LG1	4808430	4808558	+	Lypla1
	LG1	4808648	4808679	+	Lypla1
	LG1	4828775	4828840	+	Lypla1
	LG1	4830459	4830506	+	Lypla1
	LG1	4832502	4832572	+	Lypla1
	LG1	4837100	4839686	+	Lypla1
	LG1	4841154	4843022	+	Lypla1
	LG1	4845188	4846962	+	Lypla1
	LG1	4847007	4847106	+	Lypla1
	LG1	4848367	4848629	+	Lypla1
	LG1	4858056	4858218	+	Tcea1
	LG1	4858280	4858745	+	Tcea1
	LG1	4867728	4867790	+	Lypla1
	LG1	4867728	4867790	+	Tcea1
	LG1	4878265	4878370	+	Lypla1
	LG1	4878265	4878370	+	Tcea1
	LG1	4879424	4880891	-	Gm6104
	LG1	4886962	4887049	+	Lypla1
	LG1	4886962	4887049	+	Tcea1
	LG1	4889675	4889820	+	Tcea1
	LG1	4890958	4891014	+	Tcea1
	LG1	4892133	4892287	+	Tcea1
	LG1	4893635	4893781	+	Tcea1
	LG1	4895158	4895229	+	Tcea1
	LG1	4896580	4898132	+	Tcea1
	LG1	4909783	4910869	-	Rgs20
	LG1	4912521	4912755	-	Rgs20
	LG1	4917103	4917186	-	Rgs20
	LG1	4922736	4924198	-	Rgs20
	LG1	4927267	4927538	-	Gm17100
	LG1	4971141	4971412	+	Gm16041
	LG1	4971916	4972112	+	Gm16041
	LG1	4973849	4977084	+	Gm16041
	LG1	5018857	5019016	-	Rgs20
	LG1	5019596	5019824	-	Rgs20
	LG1	5021023	5021322	-	Rgs20
	LG1	5063113	5063518	-	Rgs20
	LG1	5063394	5064981	+	Gm17101
	LG1	5070351	5070626	-	Rgs20
	LG1	5083517	5083622	+	Atp6v1h
	LG1	5084761	5084907	+	Atp6v1h
	LG1	5089353	5089455	+	Atp6v1h
	LG1	5093714	5093803	+	Atp6v1h
	LG1	5095966	5096079	+	Atp6v1h
	LG1	5098380	5098484	+	Atp6v1h
	LG1	5101424	5101477	+	Atp6v1h
	LG1	5117759	5117856	+	Atp6v1h
	LG1	5124643	5124835	+	Atp6v1h
	LG1	5133445	5133623	+	Atp6v1h
	LG1	5136171	5136296	+	Atp6v1h
	LG1	5144108	5144209	+	Atp6v1h
	LG1	5150307	5150420	+	Atp6v1h
	LG1	5162464	5162908	+	Atp6v1h
	LG1	5588915	5589085	+	Oprk1
	LG1	5589363	5589727	+	Oprk1
	LG1	5596950	5599374	+	Oprk1
	LG1	5602684	5606567	+	Oprk1
	LG1	5645091	5645191	-	Gm22463
	LG1	5914220	5917911	-	Npbwr1
	LG1	6206678	6206751	+	Rb1cc1
	LG1	6213770	6213824	-	4732440D04Rik
	LG1	6214710	6215067	-	4732440D04Rik
	LG1	6215089	6215769	-	4732440D04Rik
	LG1	6215122	6215434	+	Rb1cc1
	LG1	6215485	6215729	+	Rb1cc1
	LG1	6224077	6224223	+	Rb1cc1
	LG1	6228429	6228538	+	Rb1cc1
	LG1	6230443	6231185	+	Rb1cc1
	LG1	6234444	6234570	+	Rb1cc1
	LG1	6234712	6234882	+	Rb1cc1
	LG1	6238748	6238950	+	Rb1cc1
	LG1	6240455	6240881	+	Rb1cc1
	LG1	6241479	6244790	+	Rb1cc1
	LG1	6245310	6245494	+	Rb1cc1
	LG1	6245673	6245859	+	Rb1cc1
	LG1	6245940	6246021	+	Rb1cc1
	LG1	6246113	6246174	+	Rb1cc1
	LG1	6248222	6248325	+	Rb1cc1
	LG1	6248588	6248714	+	Rb1cc1
	LG1	6248798	6250689	+	Rb1cc1
	LG1	6251454	6251781	+	Rb1cc1
	LG1	6261294	6261604	+	Rb1cc1
	LG1	6263347	6263455	+	Rb1cc1
	LG1	6263537	6263777	+	Rb1cc1
	LG1	6265065	6265416	+	Rb1cc1
	LG1	6266097	6266333	+	Rb1cc1
	LG1	6269223	6269281	+	Rb1cc1
	LG1	6271203	6273296	+	Rb1cc1
	LG1	6274723	6277170	+	Rb1cc1
	LG1	6359852	6360035	+	Fam150a
	LG1	6389067	6389120	+	Fam150a
	LG1	6389929	6390009	+	Fam150a
	LG1	6391525	6391601	+	Fam150a
	LG1	6394751	6395212	+	Fam150a
	LG1	6487708	6487882	+	St18
	LG1	6488095	6488218	+	St18
	LG1	6730583	6730772	+	St18
	LG1	6735411	6735513	+	St18
	LG1	6738118	6738200	+	St18
	LG1	6752817	6752889	+	St18
	LG1	6753488	6753557	+	St18
	LG1	6754077	6754123	+	St18
	LG1	6769442	6769496	+	St18
	LG1	6771487	6771517	+	St18
	LG1	6795914	6796104	+	St18
	LG1	6802881	6803666	+	St18
	LG1	6804135	6804279	+	St18
	LG1	6808103	6808237	+	St18
	LG1	6809837	6809927	+	St18
	LG1	6811134	6811238	+	St18
	LG1	6818160	6818356	+	St18
	LG1	6820474	6820685	+	St18
	LG1	6828314	6828559	+	St18
	LG1	6834094	6834209	+	St18
	LG1	6842679	6842741	+	St18
	LG1	6843413	6843481	+	St18
	LG1	6844661	6844723	+	St18
	LG1	6844831	6844911	+	St18
	LG1	6846108	6846332	+	St18
	LG1	6849446	6849534	+	St18
	LG1	6855895	6855998	+	St18
	LG1	6857830	6857973	+	St18
	LG1	6858990	6861467	+	St18
	LG1	7089374	7089670	+	Pcmtd1
	LG1	7120649	7121070	+	Pcmtd1
	LG1	7136651	7137038	-	RP24-149G24.1
	LG1	7148095	7148197	+	Pcmtd1
	LG1	7155325	7155729	+	Pcmtd1
	LG1	7160544	7161522	+	Pcmtd1
	LG1	7163707	7163830	+	Pcmtd1
	LG1	7166768	7166977	+	Pcmtd1
	LG1	7169973	7174086	+	Pcmtd1
	LG1	7178197	7179495	+	Gm9826
	LG1	7266262	7266391	+	Gm23274
	LG1	7349866	7350850	-	AC103380.1
	LG1	7352231	7352354	-	AC103380.1
	LG1	7398170	7398253	-	AC103380.1
	LG1	8362059	8364217	-	Sntg1
	LG1	8414783	8414893	-	Sntg1
	LG1	8445624	8445716	-	Sntg1
	LG1	8448583	8448735	-	Sntg1
	LG1	8464008	8464079	-	Sntg1
	LG1	8466052	8466168	-	Sntg1
	LG1	8469040	8469439	-	Gm16284
	LG1	8471025	8471134	-	Sntg1
	LG1	8555346	8555384	-	Sntg1
	LG1	8583821	8583950	-	Sntg1
	LG1	8589214	8589323	-	Gm23358
	LG1	8596012	8596142	-	Sntg1
	LG1	8607678	8607760	-	Sntg1
	LG1	8625409	8625511	-	Sntg1
	LG1	8676635	8678512	-	Sntg1
	LG1	8678601	8678644	-	Sntg1
	LG1	8679737	8679794	-	Sntg1
	LG1	8682639	8682695	-	Sntg1
	LG1	8782201	8783571	-	Sntg1
	LG1	8792603	8792842	-	Gm15452
	LG1	8804567	8804620	-	Sntg1
	LG1	8816797	8816906	+	Gm24276
	LG1	8856573	8856912	-	Gm6152
	LG1	8882804	8882857	-	Sntg1
	LG1	8951220	8951538	-	Sntg1
	LG1	8963640	8964265	-	Gm7493
	LG1	8999827	8999890	-	Sntg1
	LG1	9203710	9203791	-	Sntg1
	LG1	9249818	9249909	-	Sntg1
	LG1	9298643	9300399	-	Sntg1
	LG1	9459161	9459263	+	Gm24765
	LG1	9545899	9547945	+	Rrs1
	LG1	9548439	9548642	+	Adhfe1
	LG1	9550398	9550435	+	Adhfe1
	LG1	9551052	9551138	+	Adhfe1
	LG1	9552208	9552248	+	Adhfe1
	LG1	9553414	9553467	+	Adhfe1
	LG1	9553810	9553964	+	Adhfe1
	LG1	9554115	9554311	+	Adhfe1
	LG1	9556030	9556107	+	Adhfe1
	LG1	9557480	9557585	+	Adhfe1
	LG1	9558613	9558765	+	Adhfe1
	LG1	9560569	9560667	+	Adhfe1
	LG1	9561291	9562237	-	2610203C22Rik
	LG1	9563963	9564329	-	2610203C22Rik
	LG1	9563967	9564045	+	Adhfe1
	LG1	9564255	9564351	+	Adhfe1
	LG1	9567241	9567398	+	Adhfe1
	LG1	9575003	9576104	+	Gm6161
	LG1	9576646	9578423	+	Adhfe1
	LG1	9600864	9604137	-	2610203C22Rik
	LG1	9601650	9602101	+	3110035E14Rik
	LG1	9607438	9607493	+	3110035E14Rik
	LG1	9613757	9613919	+	3110035E14Rik
	LG1	9620012	9620101	-	2610203C22Rik
	LG1	9620298	9620359	+	3110035E14Rik
	LG1	9621417	9621544	-	2610203C22Rik
	LG1	9623055	9623146	+	3110035E14Rik
	LG1	9625175	9627605	+	3110035E14Rik
	LG1	9631523	9631637	-	2610203C22Rik
	LG1	9667874	9670471	-	Mybl1
	LG1	9672019	9672198	-	Mybl1
	LG1	9672652	9672756	-	Mybl1
	LG1	9672980	9673096	-	Mybl1
	LG1	9673541	9673655	-	Mybl1
	LG1	9674186	9674328	-	Mybl1
	LG1	9676408	9676776	-	Mybl1
	LG1	9678710	9679048	-	Mybl1
	LG1	9682223	9682327	-	Mybl1
	LG1	9683541	9683896	-	Mybl1
	LG1	9686080	9686254	-	Mybl1
	LG1	9688011	9688231	-	Mybl1
	LG1	9690531	9690623	-	Mybl1
	LG1	9693162	9693233	-	Mybl1
	LG1	9693732	9693837	-	Mybl1
	LG1	9700379	9700653	-	Mybl1
	LG1	9719076	9725798	-	Vcpip1
	LG1	9737408	9737494	-	Vcpip1
	LG1	9745890	9748822	-	Vcpip1
	LG1	9748088	9749044	+	AC158928.1
	LG1	9752890	9753005	+	AC158928.1
	LG1	9780765	9780863	+	AC158928.1
	LG1	9781162	9781245	+	AC158928.1
	LG1	9781965	9782040	+	AC158928.1
	LG1	9790088	9790212	+	AC158928.1
	LG1	9791564	9792361	+	AC158928.1
	LG1	9798569	9798685	+	Sgk3
	LG1	9802633	9802992	-	Gm6195
	LG1	9827454	9827560	+	Sgk3
	LG1	9834939	9835043	-	Gm22607
	LG1	9848721	9848825	+	Sgk3
	LG1	9848837	9848988	+	Sgk3
	LG1	9865549	9865766	+	Sgk3
	LG1	9868801	9868884	+	Sgk3
	LG1	9872045	9872117	+	Sgk3
	LG1	9872673	9872748	+	Sgk3
	LG1	9877584	9877671	+	Sgk3
	LG1	9879452	9879501	+	Sgk3
	LG1	9880758	9880815	+	Sgk3
	LG1	9882004	9882087	+	Sgk3
	LG1	9882186	9882317	+	Sgk3
	LG1	9884836	9884948	+	Sgk3
	LG1	9885054	9885090	+	Sgk3
	LG1	9886084	9886170	+	Sgk3
	LG1	9886464	9886559	+	Sgk3
	LG1	9889282	9889437	+	Sgk3
	LG1	9891777	9891866	+	Sgk3
	LG1	9899155	9902974	+	Sgk3
	LG1	9909060	9909130	+	Mcmdc2
	LG1	9911741	9912219	+	Mcmdc2
	LG1	9912317	9912447	+	Mcmdc2
	LG1	9912521	9912580	+	Mcmdc2
	LG1	9915912	9916107	+	Mcmdc2
	LG1	9916754	9916876	+	Mcmdc2
	LG1	9916988	9917092	+	Mcmdc2
	LG1	9919458	9919583	+	Mcmdc2
	LG1	9920874	9922964	+	Mcmdc2
	LG1	9924496	9924701	+	Mcmdc2
	LG1	9931193	9931359	+	Mcmdc2
	LG1	9932421	9932600	+	Mcmdc2
	LG1	9934340	9934482	+	Mcmdc2
	LG1	9937414	9937523	+	Mcmdc2
	LG1	9940796	9942503	+	Mcmdc2
	LG1	9942376	9942809	-	Snhg6
	LG1	9942881	9942967	-	Snord87
	LG1	9943028	9943642	-	Snhg6
	LG1	9944433	9944531	-	Snhg6
	LG1	9960586	9963223	-	Gm10567
	LG1	9969040	9969345	-	Ppp1r42
	LG1	9977001	9977160	-	Ppp1r42
	LG1	9979230	9979361	-	Ppp1r42
	LG1	9982801	9982853	+	Gm15818
	LG1	9986004	9986121	-	Ppp1r42
	LG1	9992179	9992781	+	Gm15818
	LG1	9995477	9995692	-	Ppp1r42
	LG1	9999810	9999948	-	Ppp1r42
	LG1	10000380	10000546	-	Ppp1r42
	LG1	10003643	10003861	-	Ppp1r42
	LG1	10009480	10009544	-	Ppp1r42
	LG1	10010222	10010325	-	Gm24674
	LG1	10025022	10025483	-	Cops5
	LG1	10027523	10027671	-	Cops5
	LG1	10031011	10031122	-	Cops5
	LG1	10031332	10032841	-	Cops5
	LG1	10033457	10033740	-	Cops5
	LG1	10034424	10034552	-	Cops5
	LG1	10035347	10035581	-	Cops5
	LG1	10038089	10038546	-	Cops5
	LG1	10038637	10038763	+	Cspp1
	LG1	10040192	10040306	+	Cspp1
	LG1	10040574	10040702	+	Cspp1
	LG1	10045489	10045597	+	Cspp1
	LG1	10047849	10047951	+	Cspp1
	LG1	10057358	10057381	+	Cspp1
	LG1	10059154	10060893	+	Cspp1
	LG1	10064776	10064856	+	Cspp1
	LG1	10065764	10065862	+	Cspp1
	LG1	10066867	10068772	+	Cspp1
	LG1	10075305	10075391	+	Cspp1
	LG1	10077620	10077690	+	Cspp1
	LG1	10082705	10082798	+	Cspp1
	LG1	10083953	10084525	+	Cspp1
	LG1	10086196	10086401	+	Cspp1
	LG1	10088196	10088633	+	Cspp1
	LG1	10089331	10089409	+	Cspp1
	LG1	10090637	10090766	+	Cspp1
	LG1	10096317	10096464	+	Cspp1
	LG1	10104650	10104802	+	Cspp1
	LG1	10108807	10108919	+	Cspp1
	LG1	10112832	10112981	+	Cspp1
	LG1	10113316	10113462	+	Cspp1
	LG1	10114040	10114144	+	Cspp1
	LG1	10115865	10116524	+	Cspp1
	LG1	10117086	10117203	+	Cspp1
	LG1	10126474	10126968	+	Cspp1
	LG1	10127909	10128049	+	Cspp1
	LG1	10130450	10130523	+	Cspp1
	LG1	10132944	10133007	+	Cspp1
	LG1	10133654	10133951	+	Cspp1
	LG1	10134462	10134722	+	Cspp1
	LG1	10136417	10137251	+	Cspp1
	LG1	10138054	10139479	-	Arfgef1
	LG1	10140952	10141069	-	Arfgef1
	LG1	10142040	10142178	-	Arfgef1
	LG1	10143057	10143225	-	Arfgef1
	LG1	10145199	10145338	-	Arfgef1
	LG1	10147879	10148011	-	Arfgef1
	LG1	10152286	10152358	-	Arfgef1
	LG1	10153883	10154021	-	Arfgef1
	LG1	10154104	10154239	-	Arfgef1
	LG1	10154778	10155028	-	Arfgef1
	LG1	10156910	10160243	-	Arfgef1
	LG1	10160380	10160563	-	Arfgef1
	LG1	10161201	10161370	-	Arfgef1
	LG1	10161463	10161806	-	Arfgef1
	LG1	10164194	10164284	-	Arfgef1
	LG1	10167037	10167276	+	Gm26348
	LG1	10173341	10173491	-	Arfgef1
	LG1	10173582	10173859	-	Arfgef1
	LG1	10174574	10174702	-	Arfgef1
	LG1	10180335	10180486	-	Arfgef1
	LG1	10181379	10181550	-	Arfgef1
	LG1	10184172	10184256	-	Arfgef1
	LG1	10184485	10184690	-	Arfgef1
	LG1	10184895	10185006	-	Arfgef1
	LG1	10189286	10189487	-	Arfgef1
	LG1	10189756	10189864	-	Arfgef1
	LG1	10189968	10190207	-	Arfgef1
	LG1	10194795	10195029	-	Arfgef1
	LG1	10199379	10199512	-	Arfgef1
	LG1	10200265	10200440	-	Arfgef1
	LG1	10205354	10205455	-	Arfgef1
	LG1	10209959	10210235	-	Arfgef1
	LG1	10213593	10213772	-	Arfgef1
	LG1	10214674	10214820	-	Arfgef1
	LG1	10216390	10216546	-	Arfgef1
	LG1	10217082	10217112	-	Arfgef1
	LG1	10232929	10233228	-	Arfgef1
	LG1	10325305	10325896	-	Cpa6
	LG1	10330067	10330151	-	Cpa6
	LG1	10337866	10338068	-	Cpa6
	LG1	10408889	10408979	-	Cpa6
	LG1	10409878	10409988	-	Cpa6
	LG1	10473094	10477751	-	Cpa6
	LG1	10478349	10478445	-	Cpa6
	LG1	10481636	10481737	-	Cpa6
	LG1	10484571	10484685	-	Cpa6
	LG1	10489445	10489569	-	Cpa6
	LG1	10554771	10556226	-	Gm15604
	LG1	10556227	10556333	-	Gm25253
	LG1	10596038	10596367	-	Cpa6
	LG1	10695766	10696257	+	Gm15603
	LG1	10720267	10720600	-	Cpa6
	LG1	10922375	10922465	+	Gm22963
	LG1	10994204	10994648	+	Prex2
	LG1	11062051	11062122	+	Prex2
	LG1	11066519	11066641	+	Prex2
	LG1	11068728	11068832	+	Prex2
	LG1	11080739	11080840	+	Prex2
	LG1	11090425	11090586	+	Prex2
	LG1	11099171	11099304	+	Prex2
	LG1	11101769	11101872	+	Prex2
	LG1	11108308	11108457	+	Prex2
	LG1	11110987	11111131	+	Prex2
	LG1	11113448	11113548	+	Prex2
	LG1	11123825	11123928	+	Prex2
	LG1	11124518	11124567	+	Prex2
	LG1	11133042	11133117	+	Prex2
	LG1	11134814	11134941	-	Gm24173
	LG1	11137459	11137531	+	Prex2
	LG1	11140644	11140786	+	Prex2
	LG1	11140924	11141016	+	Prex2
	LG1	11143337	11143485	+	Prex2
	LG1	11150501	11150586	+	Prex2
	LG1	11154224	11154360	+	Prex2
	LG1	11156922	11157039	+	Prex2
	LG1	11160776	11160960	+	Prex2
	LG1	11162920	11163081	+	Prex2
	LG1	11170532	11170754	+	Prex2
	LG1	11171263	11171470	+	Prex2
	LG1	11182535	11182714	+	Prex2
	LG1	11185126	11185220	+	Prex2
	LG1	11185809	11185891	+	Prex2
	LG1	11186566	11186656	+	Prex2
	LG1	11187288	11187416	+	Prex2
	LG1	11194149	11194190	+	Prex2
	LG1	11200457	11200674	+	Prex2
	LG1	11204693	11204795	+	Prex2
	LG1	11209139	11209282	+	Prex2
	LG1	11232323	11232437	+	Prex2
	LG1	11266319	11266385	+	Prex2
	LG1	11266609	11266799	+	Prex2
	LG1	11285698	11285800	+	Prex2
	LG1	11289892	11289959	+	Prex2
	LG1	11298352	11304329	+	Prex2
	LG1	11414754	11415287	+	A830018L16Rik
	LG1	11512592	11512739	+	A830018L16Rik
	LG1	11519267	11519398	+	A830018L16Rik
	LG1	11537724	11538416	+	A830018L16Rik
	LG1	11545853	11545981	+	A830018L16Rik
	LG1	11563678	11563706	+	A830018L16Rik
	LG1	11589080	11589252	+	A830018L16Rik
	LG1	11596846	11602531	+	A830018L16Rik
	LG1	11748691	11748826	+	A830018L16Rik
	LG1	11799191	11799276	+	A830018L16Rik
	LG1	11830526	11830602	+	A830018L16Rik
	LG1	11934252	11934448	+	A830018L16Rik
	LG1	11951669	11951762	+	A830018L16Rik
	LG1	11972754	11972810	+	A830018L16Rik
	LG1	11975631	11976609	+	A830018L16Rik
	LG1	12375570	12375676	+	Gm22633
	LG1	12566207	12567013	+	RP23-138D5.1
	LG1	12656507	12657193	+	RP24-331K22.1
	LG1	12668204	12669733	+	AC136316.1
	LG1	12671957	12671996	+	AC136316.1
	LG1	12672102	12673731	+	AC136316.1
	LG1	12693047	12693301	+	Sulf1
	LG1	12719153	12719391	+	Sulf1
	LG1	12729202	12729296	+	Sulf1
	LG1	12786719	12786791	+	Sulf1
	LG1	12787108	12787338	+	Sulf1
	LG1	12797399	12797638	+	Sulf1
	LG1	12805813	12805964	+	Sulf1
	LG1	12808487	12808656	+	Sulf1
	LG1	12817962	12818112	+	Sulf1
	LG1	12819002	12819177	+	Sulf1
	LG1	12821025	12821153	+	Sulf1
	LG1	12821419	12821475	+	Sulf1
	LG1	12822606	12822735	+	Sulf1
	LG1	12836758	12836974	+	Sulf1
	LG1	12839003	12839255	+	Sulf1
	LG1	12840473	12840569	+	Sulf1
	LG1	12841047	12841141	+	Sulf1
	LG1	12842077	12842142	+	Sulf1
	LG1	12843283	12843458	+	Sulf1
	LG1	12848727	12848869	+	Sulf1
	LG1	12848963	12849086	+	Sulf1
	LG1	12851392	12851425	+	Sulf1
	LG1	12859418	12860977	+	Sulf1
	LG1	12867156	12872935	-	Slco5a1
	LG1	12876917	12876981	-	Slco5a1
	LG1	12879202	12882051	-	Slco5a1
	LG1	12895036	12895234	-	Slco5a1
	LG1	12921623	12921787	-	Slco5a1
	LG1	12925448	12925620	-	Slco5a1
	LG1	12939551	12939762	-	Slco5a1
	LG1	12944544	12944676	-	Slco5a1
	LG1	12990096	12991693	-	Slco5a1
	LG1	13062517	13062846	+	Gm5250
	LG1	13113982	13115012	-	Prdm14
	LG1	13116304	13116405	-	Prdm14
	LG1	13119281	13119483	-	Prdm14
	LG1	13122878	13123148	-	Prdm14
	LG1	13124888	13125045	-	Prdm14
	LG1	13125144	13125197	-	Prdm14
	LG1	13125692	13126382	-	Prdm14
	LG1	13127632	13127685	-	Prdm14
	LG1	13139640	13143310	-	Ncoa2
	LG1	13147128	13147493	-	Ncoa2
	LG1	13148848	13149046	-	Ncoa2
	LG1	13149462	13149639	-	Ncoa2
	LG1	13151214	13151542	-	Ncoa2
	LG1	13152903	13152980	-	Ncoa2
	LG1	13153321	13153599	-	Ncoa2
	LG1	13156895	13157060	-	Ncoa2
	LG1	13160692	13160821	-	Ncoa2
	LG1	13162605	13162820	-	Ncoa2
	LG1	13165033	13165634	-	Ncoa2
	LG1	13166460	13167641	-	Ncoa2
	LG1	13174607	13175876	-	Ncoa2
	LG1	13177602	13177749	-	Ncoa2
	LG1	13181014	13181157	-	Ncoa2
	LG1	13181749	13181850	-	Ncoa2
	LG1	13182809	13184899	-	Ncoa2
	LG1	13185142	13187445	-	Ncoa2
	LG1	13190622	13190725	-	Ncoa2
	LG1	13221835	13222007	-	Ncoa2
	LG1	13225137	13225241	-	Ncoa2
	LG1	13286525	13286581	-	Ncoa2
	LG1	13300158	13300217	-	Ncoa2
	LG1	13334999	13335110	-	Gm23169
	LG1	13372659	13372915	-	Ncoa2
	LG1	13374414	13374559	-	Ncoa2
	LG1	13565063	13566758	-	Tram1
	LG1	13569833	13569993	-	Tram1
	LG1	13570301	13570444	-	Tram1
	LG1	13572165	13572269	-	Tram1
	LG1	13572366	13572436	-	Tram1
	LG1	13576731	13576815	-	Tram1
	LG1	13578463	13578521	-	Tram1
	LG1	13579813	13579929	-	Tram1
	LG1	13580053	13580174	-	Tram1
	LG1	13581386	13581449	-	Tram1
	LG1	13589938	13590202	-	Tram1
	LG1	13625184	13627243	-	Lactb2
	LG1	13627695	13627776	-	Lactb2
	LG1	13630334	13630552	-	Lactb2
	LG1	13638564	13638744	-	Lactb2
	LG1	13647742	13647868	-	Lactb2
	LG1	13651074	13651237	-	Lactb2
	LG1	13660682	13660899	-	Lactb2
	LG1	13669136	13669232	+	Xkr9
	LG1	13672486	13673124	+	Xkr9
	LG1	13684440	13684660	+	Xkr9
	LG1	13701130	13702098	+	Xkr9
	LG1	13774733	13774863	-	Gm26273
	LG1	13786273	13787269	-	RP23-70F22.1
	LG1	13932635	13932942	+	Gm25491
	LG1	14169169	14171211	-	Eya1
	LG1	14179695	14179795	-	Eya1
	LG1	14182794	14182893	+	Gm22616
	LG1	14183373	14183494	-	Eya1
	LG1	14183597	14183711	-	Eya1
	LG1	14184565	14184725	-	Eya1
	LG1	14184842	14184900	-	Eya1
	LG1	14209112	14209201	-	Eya1
	LG1	14229711	14229794	-	Eya1
	LG1	14231628	14231767	-	Eya1
	LG1	14252620	14252806	-	Eya1
	LG1	14253212	14253294	-	Eya1
	LG1	14270897	14271034	-	Eya1
	LG1	14274257	14274399	-	Eya1
	LG1	14274725	14274794	-	Eya1
	LG1	14283321	14283401	-	Eya1
	LG1	14283513	14283531	-	Eya1
	LG1	14302972	14303099	-	Eya1
	LG1	14304620	14304669	-	Eya1
	LG1	14309852	14310406	-	Eya1
	LG1	14753654	14754633	-	Msc
	LG1	14755538	14756274	-	Msc
	LG1	14755762	14758681	+	Gm9947
	LG1	14840177	14840464	-	Smt3h2-ps4
	LG1	14865380	14866273	+	Rpl5-ps1
	LG1	14872956	14874036	-	Trpa1
	LG1	14874672	14874769	-	Trpa1
	LG1	14876157	14876267	-	Trpa1
	LG1	14880507	14880575	-	Trpa1
	LG1	14881905	14882087	-	Trpa1
	LG1	14882420	14882549	-	Trpa1
	LG1	14884418	14884587	-	Trpa1
	LG1	14886058	14886147	-	Trpa1
	LG1	14887195	14887360	-	Trpa1
	LG1	14887903	14887973	-	Trpa1
	LG1	14889702	14889800	-	Trpa1
	LG1	14890703	14890762	-	Trpa1
	LG1	14891613	14891706	-	Trpa1
	LG1	14893491	14893657	-	Trpa1
	LG1	14896800	14896914	-	Trpa1
	LG1	14898317	14898481	-	Trpa1
	LG1	14898564	14898733	-	Trpa1
	LG1	14899655	14899755	-	Trpa1
	LG1	14900373	14900472	-	Trpa1
	LG1	14902170	14902218	-	Trpa1
	LG1	14903454	14903590	-	Trpa1
	LG1	14904455	14904600	-	Trpa1
	LG1	14904761	14904869	-	Trpa1
	LG1	14906231	14906338	-	Trpa1
	LG1	14911038	14911213	-	Trpa1
	LG1	14912668	14912827	-	Trpa1
	LG1	14919033	14919170	-	Trpa1
	LG1	15019348	15019467	-	Gm26345
	LG1	15269106	15270104	-	Gm10566
	LG1	15287566	15287791	+	Kcnb2
	LG1	15312666	15313333	+	Kcnb2
	LG1	15686195	15686306	-	Gm25227
	LG1	15709745	15716633	+	Kcnb2
	LG1	15758124	15758255	+	Gm25168
	LG1	15805936	15806235	+	Terf1
	LG1	15807920	15808015	+	Terf1
	LG1	15813320	15813441	+	Terf1
	LG1	15816165	15816251	+	Terf1
	LG1	15819209	15819358	+	Terf1
	LG1	15819926	15820038	+	Terf1
	LG1	15831782	15831841	+	Terf1
	LG1	15833676	15833764	+	Terf1
	LG1	15838457	15838563	+	Terf1
	LG1	15843196	15843703	+	Terf1
	LG1	15854137	15856137	-	Sbspon
	LG1	15859164	15859340	-	Sbspon
	LG1	15860536	15860626	-	Sbspon
	LG1	15879805	15880107	+	Gm23259
	LG1	15883921	15884115	-	Sbspon
	LG1	15892714	15892997	-	Sbspon
	LG1	16066177	16066472	-	4930444P10Rik
	LG1	16068998	16069053	-	4930444P10Rik
	LG1	16078778	16078910	-	4930444P10Rik
	LG1	16081040	16081422	-	4930444P10Rik
	LG1	16081878	16082720	-	4930444P10Rik
	LG1	16093189	16093540	-	4930444P10Rik
	LG1	16101509	16102813	-	Rpl7
	LG1	16102906	16103898	-	Rpl7
	LG1	16104351	16104441	-	Rpl7
	LG1	16104579	16104876	-	Rpl7
	LG1	16105984	16106516	+	Rdh10
	LG1	16108005	16108240	+	Rdh10
	LG1	16128351	16128449	+	Rdh10
	LG1	16129382	16129527	+	Rdh10
	LG1	16130690	16131393	+	Rdh10
	LG1	16131481	16133920	+	Rdh10
	LG1	16228856	16230048	-	Stau2
	LG1	16231185	16231273	-	Stau2
	LG1	16253800	16253849	+	Gm7568
	LG1	16254039	16254253	+	Gm7568
	LG1	16258930	16259079	+	Gm7568
	LG1	16263380	16263416	+	Gm7568
	LG1	16267582	16268132	+	Gm7568
	LG1	16343624	16346228	-	Stau2
	LG1	16366296	16366356	-	Stau2
	LG1	16369972	16370103	-	Stau2
	LG1	16374891	16375028	-	Stau2
	LG1	16375560	16375612	-	Stau2
	LG1	16390034	16390246	-	Stau2
	LG1	16392730	16392837	-	Stau2
	LG1	16394264	16394423	-	Stau2
	LG1	16427760	16427871	-	Stau2
	LG1	16440543	16440678	-	Stau2
	LG1	16459935	16460639	-	Stau2
	LG1	16463255	16463414	-	Stau2
	LG1	16486240	16486370	-	Stau2
	LG1	16487835	16488189	-	Stau2
	LG1	16509566	16509632	-	Stau2
	LG1	16512154	16512235	-	Stau2
	LG1	16519393	16519544	-	Stau2
	LG1	16520238	16520349	-	Stau2
	LG1	16541026	16542025	-	Ube2w
	LG1	16544187	16544270	-	Ube2w
	LG1	16564577	16564707	-	Ube2w
	LG1	16569324	16569404	-	Ube2w
	LG1	16569645	16571521	-	Ube2w
	LG1	16582162	16582237	-	Ube2w
	LG1	16584393	16585666	-	Ube2w
	LG1	16586321	16586372	-	Ube2w
	LG1	16598187	16598289	-	Ube2w
	LG1	16602215	16602589	-	Ube2w
	LG1	16619470	16619722	-	Ube2w
	LG1	16642979	16643692	-	Tceb1
	LG1	16645897	16646040	-	Tceb1
	LG1	16648170	16648222	-	Tceb1
	LG1	16657042	16657085	-	Tceb1
	LG1	16657772	16659995	+	AC157362.1
	LG1	16660238	16660445	+	AC157362.1
	LG1	16660772	16660866	+	AC157362.1
	LG1	16662238	16662495	+	AC157362.1
	LG1	16665422	16665720	+	Tmem70
	LG1	16665923	16666026	+	Tmem70
	LG1	16667879	16667987	+	Tmem70
	LG1	16677193	16678501	+	Tmem70
	LG1	16688682	16688845	+	Ly96
	LG1	16691914	16692003	+	Ly96
	LG1	16701017	16701145	+	Ly96
	LG1	16706391	16706443	+	Ly96
	LG1	16709655	16709821	+	Ly96
	LG1	16768473	16770341	-	Gm5828
	LG1	16995161	16997782	-	Jph1
	LG1	17004114	17004757	-	Jph1
	LG1	17016262	17016380	-	Jph1
	LG1	17091521	17092280	-	Jph1
	LG1	17097449	17098112	-	Jph1
	LG1	17145585	17145811	+	Gdap1
	LG1	17147159	17147351	+	Gdap1
	LG1	17157184	17158967	+	Gdap1
	LG1	17160147	17160261	+	Gdap1
	LG1	17161350	17164494	+	Gdap1
	LG1	17520222	17520332	+	Gm25166
	LG1	17602122	17602263	+	Pi15
	LG1	17602798	17603105	+	Pi15
	LG1	17620004	17620122	+	Pi15
	LG1	17621622	17621754	+	Pi15
	LG1	17621868	17621983	+	Pi15
	LG1	17625056	17631159	+	Pi15
	LG1	17676248	17677325	-	Gm16070
	LG1	17693125	17697374	-	Gm16070
	LG1	17707891	17707947	-	Gm16070
	LG1	17709907	17710116	-	Gm16070
	LG1	17712671	17712815	-	Gm16070
	LG1	17724744	17724811	-	Gm16070
	LG1	17725206	17727194	-	Gm16070
	LG1	17727267	17727985	+	Crispld1
	LG1	17727321	17727868	-	Gm16070
	LG1	17728816	17729136	+	Crispld1
	LG1	17745576	17745694	+	Crispld1
	LG1	17746002	17746134	+	Crispld1
	LG1	17746953	17747068	+	Crispld1
	LG1	17747723	17747823	+	Crispld1
	LG1	17749729	17749869	+	Crispld1
	LG1	17750487	17750547	+	Crispld1
	LG1	17750656	17750722	+	Crispld1
	LG1	17750956	17751086	+	Crispld1
	LG1	17753060	17753103	+	Crispld1
	LG1	17753190	17753262	+	Crispld1
	LG1	17756480	17756555	+	Crispld1
	LG1	17762334	17762464	+	Crispld1
	LG1	17764285	17766566	+	Crispld1
	LG1	18115409	18115974	-	Crisp4
	LG1	18122956	18123044	-	Crisp4
	LG1	18124450	18124547	-	Crisp4
	LG1	18128860	18130467	-	Crisp4
	LG1	18134257	18134391	-	Crisp4
	LG1	18137206	18137270	-	Crisp4
	LG1	18141634	18141750	-	Crisp4
	LG1	18146062	18146120	-	Crisp4
	LG1	18210270	18210447	-	Defb44-ps
	LG1	18223741	18223781	-	Defb44-ps
	LG1	18236694	18236881	-	Defb18
	LG1	18237595	18237664	-	Defb18
	LG1	18251201	18251554	-	Defb41
	LG1	18260745	18260887	-	Gm15386
	LG1	18265247	18265359	-	Defb41
	LG1	18265247	18265359	-	Gm15386
	LG1	18969993	18970064	-	Gm24075
	LG1	19063530	19063754	-	Gm15825
	LG1	19065113	19065271	-	Gm15825
	LG1	19075332	19075695	-	Gm15825
	LG1	19103253	19103525	+	Tfap2d
	LG1	19104595	19105092	+	Tfap2d
	LG1	19104901	19105071	-	Gm15825
	LG1	19107412	19107604	+	Tfap2d
	LG1	19108481	19108541	+	Tfap2d
	LG1	19119063	19119228	+	Tfap2d
	LG1	19119395	19119513	+	Tfap2d
	LG1	19143070	19143211	+	Tfap2d
	LG1	19148537	19148650	+	Tfap2d
	LG1	19153543	19154199	-	Gm10075
	LG1	19166192	19166579	+	Tfap2d
	LG1	19209142	19209480	+	Tfap2b
	LG1	19212286	19212655	+	Tfap2b
	LG1	19214183	19214641	+	Tfap2b
	LG1	19219425	19219485	+	Tfap2b
	LG1	19226666	19226885	+	Tfap2b
	LG1	19228672	19228790	+	Tfap2b
	LG1	19231243	19231384	+	Tfap2b
	LG1	19234280	19238961	+	Tfap2b
	LG1	19514010	19514074	-	Gm24633
	LG1	19921421	19921510	-	Gm25568
	LG1	20057848	20058785	-	Pkhd1
	LG1	20070437	20070559	-	Pkhd1
	LG1	20073516	20073674	-	Pkhd1
	LG1	20081247	20081354	-	Pkhd1
	LG1	20103278	20103365	-	Pkhd1
	LG1	20104605	20104740	-	Pkhd1
	LG1	20117004	20118021	-	Pkhd1
	LG1	20198041	20198198	-	Pkhd1
	LG1	20199365	20199533	-	Pkhd1
	LG1	20200535	20201410	-	Pkhd1
	LG1	20209165	20209317	-	Pkhd1
	LG1	20211835	20211989	-	Pkhd1
	LG1	20220035	20220122	-	Pkhd1
	LG1	20222853	20222966	-	Pkhd1
	LG1	20239297	20239434	-	Pkhd1
	LG1	20275549	20275677	-	Pkhd1
	LG1	20288239	20288304	-	Pkhd1
	LG1	20310518	20310713	-	Pkhd1
	LG1	20312035	20312212	-	Pkhd1
	LG1	20347195	20347441	-	Pkhd1
	LG1	20350397	20350529	-	Pkhd1
	LG1	20358830	20358964	-	Pkhd1
	LG1	20360977	20361082	-	Pkhd1
	LG1	20364102	20364214	-	Pkhd1
	LG1	20373841	20373971	-	Pkhd1
	LG1	20374697	20374753	-	Pkhd1
	LG1	20377360	20377485	-	Pkhd1
	LG1	20381080	20381206	+	4930486I03Rik
	LG1	20381390	20381581	-	Pkhd1
	LG1	20391444	20391601	-	Pkhd1
	LG1	20391871	20392279	+	4930486I03Rik
	LG1	20391991	20392198	-	Pkhd1
	LG1	20409325	20409416	-	Pkhd1
	LG1	20414159	20414371	-	Pkhd1
	LG1	20444208	20444510	-	Gm15795
	LG1	20444761	20444862	-	Gm24162
	LG1	20450141	20450297	-	Pkhd1
	LG1	20502826	20502976	-	Pkhd1
	LG1	20508789	20509008	-	Pkhd1
	LG1	20520043	20520186	-	Pkhd1
	LG1	20522575	20524176	-	Pkhd1
	LG1	20533779	20533846	-	Pkhd1
	LG1	20534472	20534667	-	Pkhd1
	LG1	20537209	20537344	-	Pkhd1
	LG1	20540250	20540380	-	Pkhd1
	LG1	20547203	20547478	-	Pkhd1
	LG1	20548022	20548127	-	Pkhd1
	LG1	20549611	20549733	-	Pkhd1
	LG1	20550771	20550955	-	Pkhd1
	LG1	20553392	20553519	-	Pkhd1
	LG1	20555001	20555139	-	Pkhd1
	LG1	20558511	20558686	-	Pkhd1
	LG1	20559344	20559471	-	Pkhd1
	LG1	20562283	20562425	-	Pkhd1
	LG1	20563547	20563637	-	Pkhd1
	LG1	20563725	20563814	-	Pkhd1
	LG1	20565523	20565801	-	Pkhd1
	LG1	20566682	20566796	-	Pkhd1
	LG1	20567372	20567513	-	Pkhd1
	LG1	20569753	20569848	-	Pkhd1
	LG1	20571263	20571364	-	Pkhd1
	LG1	20583981	20584051	-	Pkhd1
	LG1	20585079	20585118	-	Pkhd1
	LG1	20585567	20585631	-	Pkhd1
	LG1	20586744	20586818	-	Pkhd1
	LG1	20588405	20588483	-	Pkhd1
	LG1	20592870	20593885	-	Pkhd1
	LG1	20606208	20606533	-	Pkhd1
	LG1	20608231	20608339	-	Pkhd1
	LG1	20612619	20612760	-	Pkhd1
	LG1	20613314	20613391	-	Pkhd1
	LG1	20615187	20615323	-	Pkhd1
	LG1	20617838	20617991	-	Pkhd1
	LG1	20678864	20678936	+	Mir206
	LG1	20682624	20682742	+	Mir133b
	LG1	20730751	20730834	+	Il17a
	LG1	20731942	20732153	+	Il17a
	LG1	20733467	20734341	+	Il17a
	LG1	20777001	20777854	-	Il17f
	LG1	20779141	20779361	-	Il17f
	LG1	20784023	20784120	-	Il17f
	LG1	20802824	20803504	-	Mcm3
	LG1	20804667	20804757	-	Mcm3
	LG1	20805113	20805189	-	Mcm3
	LG1	20805647	20805750	-	Mcm3
	LG1	20806592	20806732	-	Mcm3
	LG1	20808571	20808721	-	Mcm3
	LG1	20809446	20809572	-	Mcm3
	LG1	20809908	20810082	-	Mcm3
	LG1	20811815	20812023	-	Mcm3
	LG1	20812414	20812545	-	Mcm3
	LG1	20812811	20812964	-	Mcm3
	LG1	20814249	20814357	-	Mcm3
	LG1	20814539	20814777	-	Mcm3
	LG1	20816485	20816615	-	Mcm3
	LG1	20817076	20817284	-	Mcm3
	LG1	20817649	20817761	-	Mcm3
	LG1	20820008	20820155	-	Mcm3
	LG1	20842386	20842517	-	Gm24723
	LG1	20888534	20889023	-	AC156980.1
	LG1	20889360	20889539	-	AC156980.1
	LG1	20889730	20889813	-	AC156980.1
	LG1	20889992	20890357	-	AC156980.1
	LG1	20890506	20890570	+	Paqr8
	LG1	20915297	20915427	-	Gm24171
	LG1	20917761	20917776	+	Paqr8
	LG1	20922146	20922253	+	Paqr8
	LG1	20931947	20932126	+	Paqr8
	LG1	20934469	20938642	+	Paqr8
	LG1	20951513	20951683	+	Efhc1
	LG1	20955222	20955443	+	Efhc1
	LG1	20960018	20960305	+	Efhc1
	LG1	20961041	20961190	+	Efhc1
	LG1	20967212	20967404	+	Efhc1
	LG1	20972663	20972883	+	Efhc1
	LG1	20974787	20974927	+	Efhc1
	LG1	20978531	20978744	+	Efhc1
	LG1	20979298	20979445	+	Efhc1
	LG1	20989256	20989490	+	Efhc1
	LG1	20990505	20990726	+	Efhc1
	LG1	20996184	21001523	-	Tram2
	LG1	21002858	21003021	-	Tram2
	LG1	21003726	21003869	-	Tram2
	LG1	21004114	21004218	-	Tram2
	LG1	21005455	21005525	-	Tram2
	LG1	21006038	21006122	-	Tram2
	LG1	21006741	21006799	-	Tram2
	LG1	21012681	21012797	-	Tram2
	LG1	21013290	21013399	-	Tram2
	LG1	21037285	21037348	-	Tram2
	LG1	21078881	21079116	-	Tram2
	LG1	21218439	21218753	+	Tmem14a
	LG1	21225417	21225502	+	Tmem14a
	LG1	21225805	21225906	+	Tmem14a
	LG1	21226452	21226539	+	Tmem14a
	LG1	21229268	21230027	+	Tmem14a
	LG1	21240422	21240492	+	Gsta3
	LG1	21244784	21244878	+	Gsta3
	LG1	21249595	21249702	+	Gsta3
	LG1	21254537	21254676	+	Gsta3
	LG1	21257180	21257231	+	Gsta3
	LG1	21258698	21258830	+	Gsta3
	LG1	21259898	21260039	+	Gsta3
	LG1	21262646	21262777	+	Gsta3
	LG1	21264694	21265212	+	Gsta3
	LG1	21272195	21272939	+	Gm7094
	LG1	21285101	21285588	-	Gm4956
	LG1	21287998	21288129	-	Gm4956
	LG1	21289840	21289985	-	Gm4956
	LG1	21291139	21291280	-	Gm4956
	LG1	21293324	21293456	-	Gm4956
	LG1	21294769	21294820	-	Gm4956
	LG1	21297899	21298170	-	Gm4956
	LG1	21312364	21312490	-	Gm21909
	LG1	21313282	21313423	-	Gm21909
	LG1	21315099	21315220	-	Gm21909
	LG1	21316112	21316160	-	Gm21909
	LG1	21349455	21349933	+	Khdc1a
	LG1	21350072	21350254	+	Khdc1a
	LG1	21350690	21352014	+	Khdc1a
	LG1	21353820	21353917	+	Gm16329
	LG1	21354216	21354397	+	Gm16329
	LG1	21354841	21354931	+	Gm16329
	LG1	21364626	21364853	+	Gm16327
	LG1	21368155	21368581	+	Khdc1c
	LG1	21368716	21368898	+	Khdc1c
	LG1	21369334	21370664	+	Khdc1c
	LG1	21372487	21372559	+	Gm2709
	LG1	21372855	21373035	+	Gm2709
	LG1	21373486	21373581	+	Gm2709
	LG1	21379364	21379591	+	Gm16533
	LG1	21383351	21383831	+	Khdc1b
	LG1	21383970	21384152	+	Khdc1b
	LG1	21384597	21386172	+	Khdc1b
	LG1	21390705	21390900	+	Gm16328
	LG1	21398176	21402893	-	Kcnq5
	LG1	21404700	21404826	-	Kcnq5
	LG1	21405561	21405692	-	Kcnq5
	LG1	21423815	21423923	-	Kcnq5
	LG1	21457177	21457397	-	Kcnq5
	LG1	21461321	21461377	-	Kcnq5
	LG1	21466016	21466180	-	Kcnq5
	LG1	21469241	21469335	-	Kcnq5
	LG1	21479141	21479236	-	Kcnq5
	LG1	21486969	21487079	-	Kcnq5
	LG1	21505042	21505167	-	Kcnq5
	LG1	21505426	21505601	-	Kcnq5
	LG1	21511628	21512886	-	Gm7658
	LG1	21534828	21534954	-	Kcnq5
	LG1	21577439	21577818	-	Kcnq5
	LG1	21593319	21593409	-	Kcnq5
	LG1	21835723	21835756	-	Kcnq5
	LG1	21837533	21837631	-	Kcnq5
	LG1	21855670	21855727	-	Kcnq5
	LG1	21959758	21960976	+	AC125483.1
	LG1	21961046	21961263	+	AC125483.1
	LG1	21961097	21961858	-	Kcnq5
	LG1	21961789	21962446	+	AC125483.1
	LG1	22286122	22288511	-	Rims1
	LG1	22289931	22290070	-	Rims1
	LG1	22290884	22290985	-	Rims1
	LG1	22292695	22292807	-	Rims1
	LG1	22296732	22296870	-	Rims1
	LG1	22315622	22315695	-	Rims1
	LG1	22346200	22346435	-	Rims1
	LG1	22373232	22373398	-	Rims1
	LG1	22379306	22379418	-	Rims1
	LG1	22397332	22397444	-	Rims1
	LG1	22398480	22398662	-	Rims1
	LG1	22404338	22404409	-	Rims1
	LG1	22412099	22412182	-	Rims1
	LG1	22421621	22421710	-	Rims1
	LG1	22425751	22425813	-	Rims1
	LG1	22427342	22427467	-	Rims1
	LG1	22428338	22428494	-	Rims1
	LG1	22432645	22432714	-	Rims1
	LG1	22432717	22432794	-	Rims1
	LG1	22432796	22432861	-	Rims1
	LG1	22467913	22467969	-	Rims1
	LG1	22467972	22467981	-	Rims1
	LG1	22468063	22468193	-	Rims1
	LG1	22472598	22472710	-	Rims1
	LG1	22475561	22475607	-	Rims1
	LG1	22479308	22479431	-	Rims1
	LG1	22483026	22483125	-	Rims1
	LG1	22484515	22484625	-	Rims1
	LG1	22486462	22486526	-	Rims1
	LG1	22533288	22533357	-	Rims1
	LG1	22533684	22533686	-	Rims1
	LG1	22533844	22534129	-	Rims1
	LG1	22538175	22538512	-	Rims1
	LG1	22552624	22552628	-	Rims1
	LG1	22574622	22574628	-	Rims1
	LG1	22592194	22592199	-	Rims1
	LG1	22592923	22592934	-	Rims1
	LG1	22596255	22596474	-	Rims1
	LG1	22630303	22630371	-	Rims1
	LG1	22726847	22726927	-	Rims1
	LG1	22740672	22741473	+	RP23-42E3.1
	LG1	22805482	22805915	-	Rims1
	LG1	23100389	23102169	-	4933415F23Rik
	LG1	23245131	23245251	+	Gm24176
	LG1	23255907	23256326	-	Gm6420
	LG1	23272189	23272259	+	Mir30a
	LG1	23291457	23291855	+	Mir30c-2
	LG1	23291457	23291855	+	mmu-mir-30c-2
	LG1	23366344	23370368	-	Ogfrl1
	LG1	23375650	23375795	-	Ogfrl1
	LG1	23375908	23375974	-	Ogfrl1
	LG1	23376091	23376169	-	Ogfrl1
	LG1	23378646	23378724	-	Ogfrl1
	LG1	23378892	23378978	-	Ogfrl1
	LG1	23382735	23383095	-	Ogfrl1
	LG1	23479459	23480447	+	RP24-361E14.1
	LG1	23761677	23763152	+	B3gat2
	LG1	23815145	23815664	+	B3gat2
	LG1	23844770	23845281	-	Smap1
	LG1	23844797	23844945	+	B3gat2
	LG1	23845025	23849082	+	B3gat2
	LG1	23845549	23846487	-	Smap1
	LG1	23847643	23847701	-	Smap1
	LG1	23848188	23848495	-	Smap1
	LG1	23848719	23849392	-	Smap1
	LG1	23853347	23853474	-	Smap1
	LG1	23858947	23859037	-	Smap1
	LG1	23866141	23866221	-	Smap1
	LG1	23869848	23869898	-	Smap1
	LG1	23871362	23871442	-	Smap1
	LG1	23876298	23876373	-	Smap1
	LG1	23877633	23877718	-	Smap1
	LG1	23891784	23891918	-	Smap1
	LG1	23909587	23909660	-	Smap1
	LG1	23921962	23922241	-	Smap1
	LG1	23995865	23996286	-	1110058L19Rik
	LG1	24002892	24003232	-	1110058L19Rik
	LG1	24005431	24005820	+	ENSMUSG00000053484
	LG1	24005472	24005582	-	1110058L19Rik
	LG1	24010684	24012423	-	Fam135a
	LG1	24014705	24014818	-	Fam135a
	LG1	24020601	24020711	-	Fam135a
	LG1	24021780	24021931	-	Fam135a
	LG1	24024139	24024236	-	Fam135a
	LG1	24024708	24024799	-	Fam135a
	LG1	24026534	24026694	-	Fam135a
	LG1	24028126	24030454	-	Fam135a
	LG1	24030668	24030822	-	Fam135a
	LG1	24032589	24032662	-	Fam135a
	LG1	24044036	24044191	-	Fam135a
	LG1	24046280	24046329	-	Fam135a
	LG1	24053105	24053258	-	Fam135a
	LG1	24053926	24054052	-	Fam135a
	LG1	24055666	24055839	-	Fam135a
	LG1	24057126	24057196	-	Fam135a
	LG1	24057288	24057427	-	Fam135a
	LG1	24067821	24067900	-	Fam135a
	LG1	24085333	24085448	-	Fam135a
	LG1	24086442	24086533	-	Fam135a
	LG1	24099983	24100263	-	Fam135a
	LG1	24125197	24126063	+	RP23-255J24.1
	LG1	24177532	24177790	+	Col9a1
	LG1	24178181	24178254	+	Col9a1
	LG1	24179206	24179283	+	Col9a1
	LG1	24179397	24179529	+	Col9a1
	LG1	24184960	24185356	+	Col9a1
	LG1	24194605	24194688	+	Col9a1
	LG1	24195109	24195379	+	Col9a1
	LG1	24195439	24195459	+	Col9a1
	LG1	24196813	24196887	+	Col9a1
	LG1	24196939	24197257	+	Col9a1
	LG1	24197366	24197428	+	Col9a1
	LG1	24201936	24201989	+	Col9a1
	LG1	24202219	24202254	+	Col9a1
	LG1	24204580	24204603	+	Col9a1
	LG1	24204976	24205029	+	Col9a1
	LG1	24207308	24207361	+	Col9a1
	LG1	24208096	24208128	+	Col9a1
	LG1	24208981	24209037	+	Col9a1
	LG1	24210295	24210348	+	Col9a1
	LG1	24214461	24214514	+	Col9a1
	LG1	24217458	24217511	+	Col9a1
	LG1	24220666	24220719	+	Col9a1
	LG1	24221501	24221554	+	Col9a1
	LG1	24221692	24221745	+	Col9a1
	LG1	24221867	24221920	+	Col9a1
	LG1	24222344	24222397	+	Col9a1
	LG1	24223497	24223541	+	Col9a1
	LG1	24224426	24224479	+	Col9a1
	LG1	24224569	24224622	+	Col9a1
	LG1	24229439	24230171	+	Col9a1
	LG1	24230805	24230877	+	Col9a1
	LG1	24231373	24231408	+	Col9a1
	LG1	24232107	24232151	+	Col9a1
	LG1	24233493	24233525	+	Col9a1
	LG1	24237047	24237193	+	Col9a1
	LG1	24237364	24237418	+	Col9a1
	LG1	24239129	24239317	+	Col9a1
	LG1	24244280	24244357	+	Col9a1
	LG1	24251599	24252606	+	Col9a1
	LG1	24261812	24264739	-	Col19a1
	LG1	24264887	24264964	-	Col19a1
	LG1	24270288	24270416	-	Col19a1
	LG1	24279692	24279920	-	Col19a1
	LG1	24282339	24282509	-	Col19a1
	LG1	24284975	24285019	-	Col19a1
	LG1	24285176	24285211	-	Col19a1
	LG1	24289589	24289651	-	Col19a1
	LG1	24289750	24289794	-	Col19a1
	LG1	24292994	24293038	-	Col19a1
	LG1	24296682	24296735	-	Col19a1
	LG1	24300515	24300541	-	Col19a1
	LG1	24301197	24301241	-	Col19a1
	LG1	24301322	24301372	-	Col19a1
	LG1	24303378	24303422	-	Col19a1
	LG1	24306182	24306235	-	Col19a1
	LG1	24307568	24307621	-	Col19a1
	LG1	24311969	24312022	-	Col19a1
	LG1	24312234	24312287	-	Col19a1
	LG1	24312370	24312474	-	Col19a1
	LG1	24315320	24315361	-	Col19a1
	LG1	24317314	24317367	-	Col19a1
	LG1	24317455	24317508	-	Col19a1
	LG1	24317612	24317647	-	Col19a1
	LG1	24321955	24322032	-	Col19a1
	LG1	24322136	24322180	-	Col19a1
	LG1	24322861	24322950	-	Col19a1
	LG1	24323604	24323657	-	Col19a1
	LG1	24325172	24325225	-	Col19a1
	LG1	24325901	24325954	-	Col19a1
	LG1	24326053	24326088	-	Col19a1
	LG1	24327958	24327993	-	Col19a1
	LG1	24332352	24332414	-	Col19a1
	LG1	24337820	24337861	-	Col19a1
	LG1	24352204	24352257	-	Col19a1
	LG1	24374505	24374558	-	Col19a1
	LG1	24410118	24410171	-	Col19a1
	LG1	24416934	24417013	-	Col19a1
	LG1	24451684	24451719	-	Col19a1
	LG1	24452393	24452667	-	Col19a1
	LG1	24453666	24453719	-	Col19a1
	LG1	24461398	24461451	-	Col19a1
	LG1	24508106	24508150	-	Col19a1
	LG1	24510765	24510809	-	Col19a1
	LG1	24525526	24525588	-	Col19a1
	LG1	24526307	24526432	-	Col19a1
	LG1	24529850	24529930	-	Col19a1
	LG1	24533955	24534230	-	Col19a1
	LG1	24536801	24536924	-	Col19a1
	LG1	24548763	24548899	-	Gm26418
	LG1	24559576	24559675	-	Col19a1
	LG1	24561225	24561290	-	Col19a1
	LG1	24575255	24575381	-	Col19a1
	LG1	24587276	24587398	-	Col19a1
	LG1	24612351	24612647	-	Gm10222
	LG1	24678492	24678764	+	Lmbrd1
	LG1	24685345	24685521	+	Lmbrd1
	LG1	24692889	24692949	+	Lmbrd1
	LG1	24704765	24704862	+	Lmbrd1
	LG1	24705921	24705988	+	Lmbrd1
	LG1	24711456	24711544	+	Lmbrd1
	LG1	24714853	24714926	+	Lmbrd1
	LG1	24728490	24728615	+	Lmbrd1
	LG1	24731691	24731843	+	Lmbrd1
	LG1	24743827	24743891	+	Lmbrd1
	LG1	24744200	24744302	+	Lmbrd1
	LG1	24744810	24744914	+	Lmbrd1
	LG1	24746749	24746898	+	Lmbrd1
	LG1	24748744	24748822	+	Lmbrd1
	LG1	24762136	24762227	+	Lmbrd1
	LG1	24762567	24766243	+	Lmbrd1
	LG1	25067423	25068303	-	Bai3
	LG1	25074632	25074736	-	Bai3
	LG1	25084191	25084226	-	Bai3
	LG1	25091401	25094355	-	Bai3
	LG1	25098823	25098862	-	Bai3
	LG1	25101380	25101475	-	Bai3
	LG1	25111639	25111810	-	Bai3
	LG1	25112124	25112222	-	Bai3
	LG1	25117236	25117321	-	Bai3
	LG1	25126588	25126654	-	Bai3
	LG1	25128766	25128835	-	Bai3
	LG1	25131198	25131348	-	Bai3
	LG1	25204477	25204669	-	Bai3
	LG1	25217981	25221808	-	Bai3
	LG1	25223676	25224119	+	Gm15702
	LG1	25226666	25226769	-	Bai3
	LG1	25228367	25229046	-	Bai3
	LG1	25279391	25279497	-	Gm22260
	LG1	25396383	25396426	-	Bai3
	LG1	25420505	25420607	-	Bai3
	LG1	25431370	25431445	-	Bai3
	LG1	25432374	25432523	-	Bai3
	LG1	25451018	25451121	+	Gm25294
	LG1	25456939	25457047	-	Bai3
	LG1	25460690	25460758	-	Bai3
	LG1	25487872	25488066	-	Bai3
	LG1	25504380	25504486	-	Bai3
	LG1	25504860	25504961	-	Bai3
	LG1	25531817	25531981	-	Bai3
	LG1	25532422	25532586	-	Bai3
	LG1	25547363	25547527	-	Bai3
	LG1	25553622	25553783	-	Bai3
	LG1	25559702	25559812	-	Bai3
	LG1	25825950	25826721	-	Bai3
	LG1	25827853	25828032	-	Bai3
	LG1	25829408	25829653	-	Bai3
	LG1	25830603	25831824	+	Gm9884
	LG1	26566777	26566882	+	Gm24064
	LG1	26681757	26685854	-	4931408C20Rik
	LG1	26687184	26687403	-	4931408C20Rik
	LG1	26959042	26959160	-	n-R5s209
	LG1	28580468	28580738	-	Gm7846
	LG1	28776124	28778764	-	Gm597
	LG1	28780015	28780233	-	Gm597
	LG1	28800218	28802704	-	Gm5697
	LG1	28938076	28938381	+	Gm6462
	LG1	29280911	29281022	-	Gm25586
	LG1	29284554	29284622	-	Gm22754
	LG1	29301435	29301532	+	Gm22679
	LG1	29361200	29361295	-	Gm23785
	LG1	29985845	29985954	+	Gm23771
	LG1	30718385	30719036	-	Gm9898
	LG1	30719279	30719793	-	Gm9898
	LG1	30802191	30805791	-	Phf3
	LG1	30806018	30806213	-	Phf3
	LG1	30808572	30808661	-	Phf3
	LG1	30810532	30810679	-	Phf3
	LG1	30811621	30811816	-	Phf3
	LG1	30812866	30813001	-	Phf3
	LG1	30813809	30813940	-	Phf3
	LG1	30816316	30816432	-	Phf3
	LG1	30819929	30820085	-	Phf3
	LG1	30820531	30820675	-	Phf3
	LG1	30820979	30821162	-	Phf3
	LG1	30824058	30824367	-	Phf3
	LG1	30829691	30831407	-	Phf3
	LG1	30836952	30837113	-	Phf3
	LG1	30862835	30863104	-	Phf3
	LG1	30940168	30943188	-	Ptp4a1
	LG1	30943797	30944169	-	Ptp4a1
	LG1	30944401	30944531	-	Ptp4a1
	LG1	30944803	30946504	-	Ptp4a1
	LG1	30948862	30949173	-	Ptp4a1
	LG1	30949414	30949635	-	Ptp4a1
	LG1	30976816	30977869	-	Gm5698
	LG1	30978745	30978831	-	Gm5698
	LG1	30986091	30986819	-	Gm9458
	LG1	30997733	30998809	-	Gm5699
	LG1	30999685	30999771	-	Gm5699
	LG1	31140950	31141646	-	4931428L18Rik
	LG1	31176332	31176406	+	Lgsn
	LG1	31189297	31189429	+	Lgsn
	LG1	31190293	31190454	+	Lgsn
	LG1	31196699	31196865	+	Lgsn
	LG1	31202861	31203307	-	4931428L18Rik
	LG1	31203250	31204575	+	Lgsn
	LG1	31204171	31204392	-	4931428L18Rik
	LG1	31222395	31222580	-	4931428L18Rik
	LG1	31222758	31224208	+	Pih1d3
	LG1	31259515	31259641	-	Gm26145
	LG1	31286870	31287631	+	Gm6489
	LG1	31615400	31616785	+	Gm10307
	LG1	31656596	31656702	-	Gm23032
	LG1	31736027	31736867	+	Gm7910
	LG1	32172865	32173067	+	Khdrbs2
	LG1	32213186	32213292	-	Gm25814
	LG1	32243957	32244084	+	Khdrbs2
	LG1	32333580	32333696	+	Khdrbs2
	LG1	32414993	32415139	+	Khdrbs2
	LG1	32467877	32468004	+	Khdrbs2
	LG1	32472685	32472883	+	Khdrbs2
	LG1	32519661	32521097	-	Gm9839
	LG1	32543651	32547393	-	Gm5415
	LG1	32568453	32568515	-	Gm24732
	LG1	32619235	32619317	+	Khdrbs2
	LG1	32644144	32644202	+	Khdrbs2
	LG1	32657497	32657791	+	Khdrbs2
	LG1	32726692	32726983	+	Gm23024
	LG1	33192046	33192155	+	Gm24901
	LG1	33293692	33293791	+	Gm25792
	LG1	33422716	33422821	+	Gm23453
	LG1	33453790	33454283	-	Prim2
	LG1	33464034	33464102	-	Prim2
	LG1	33480423	33480505	-	Prim2
	LG1	33484647	33484773	-	Prim2
	LG1	33511981	33512166	-	Prim2
	LG1	33514110	33514182	-	Prim2
	LG1	33533253	33533320	-	Prim2
	LG1	33628353	33628490	-	Prim2
	LG1	33630296	33630391	-	Prim2
	LG1	33662203	33662323	-	Prim2
	LG1	33663734	33663813	-	Prim2
	LG1	33667002	33667105	-	Prim2
	LG1	33668815	33668977	-	Prim2
	LG1	33669581	33669743	-	Prim2
	LG1	33669800	33670669	+	1700001G17Rik
	LG1	33719861	33720152	+	Rab23
	LG1	33720387	33720563	+	Rab23
	LG1	33721588	33721679	+	Rab23
	LG1	33723766	33726871	+	Rab23
	LG1	33734522	33735345	+	Rab23
	LG1	33736648	33736873	+	Rab23
	LG1	33738126	33738369	+	Rab23
	LG1	33739242	33742553	+	Rab23
	LG1	33745473	33747005	-	Bag2
	LG1	33748206	33748708	-	Bag2
	LG1	33757538	33757753	-	Bag2
	LG1	33760431	33762168	-	Zfp451
	LG1	33765777	33765842	-	Zfp451
	LG1	33767552	33769840	-	Zfp451
	LG1	33770702	33770832	-	Zfp451
	LG1	33772826	33772966	-	Zfp451
	LG1	33776202	33777796	-	Zfp451
	LG1	33778977	33779124	-	Zfp451
	LG1	33779829	33779982	-	Zfp451
	LG1	33782001	33782127	-	Zfp451
	LG1	33782974	33783124	-	Zfp451
	LG1	33783786	33783897	-	Zfp451
	LG1	33786340	33786465	-	Zfp451
	LG1	33792071	33803548	-	Zfp451
	LG1	33805277	33805357	-	Zfp451
	LG1	33810350	33810582	-	Zfp451
	LG1	33813464	33813748	-	Zfp451
	LG1	33814066	33814147	-	Zfp451
	LG1	33814276	33814533	-	Zfp451
	LG1	33835827	33838842	-	Gm15455
	LG1	33851968	33853283	-	Bend6
	LG1	33862568	33862687	-	Bend6
	LG1	33863085	33863848	-	Bend6
	LG1	33864437	33864657	-	Bend6
	LG1	33873674	33873826	-	Bend6
	LG1	33878182	33878359	-	Bend6
	LG1	33883364	33883765	-	Bend6
	LG1	33907493	33907743	-	Bend6
	LG1	33908152	33908379	+	Dst
	LG1	33908926	33908960	+	Dst
	LG1	33968655	33968855	+	Dst
	LG1	33981362	33981454	-	Gm23792
	LG1	34005835	34005960	+	Dst
	LG1	34006079	34006350	+	Dst
	LG1	34011777	34011867	+	Dst
	LG1	34086202	34086263	+	Dst
	LG1	34089252	34089388	+	Dst
	LG1	34113895	34113984	+	Dst
	LG1	34116080	34116157	+	Dst
	LG1	34117397	34119117	+	Dst
	LG1	34121213	34122355	+	Dst
	LG1	34135089	34137136	+	Dst
	LG1	34152212	34152324	+	Dst
	LG1	34152423	34152529	+	Dst
	LG1	34154523	34154642	+	Dst
	LG1	34156609	34156704	+	Dst
	LG1	34156791	34156918	+	Dst
	LG1	34160253	34160496	+	Dst
	LG1	34160620	34160713	+	Dst
	LG1	34161000	34161154	+	Dst
	LG1	34161920	34165413	+	Dst
	LG1	34165870	34167113	-	RP23-151I7.1
	LG1	34166195	34166320	+	Dst
	LG1	34166960	34167109	+	Dst
	LG1	34167299	34167453	+	Dst
	LG1	34167634	34167760	+	Dst
	LG1	34167846	34168029	+	Dst
	LG1	34169166	34169291	-	RP23-151I7.1
	LG1	34169185	34169342	+	Dst
	LG1	34169770	34169948	+	Dst
	LG1	34170362	34170500	+	Dst
	LG1	34171118	34171311	+	Dst
	LG1	34172189	34172351	+	Dst
	LG1	34173006	34173089	+	Dst
	LG1	34174117	34174224	+	Dst
	LG1	34174699	34174797	+	Dst
	LG1	34177800	34180502	+	Dst
	LG1	34177892	34178275	-	RP23-151I7.1
	LG1	34181140	34183908	+	Dst
	LG1	34184020	34184148	+	Dst
	LG1	34185966	34186054	+	Dst
	LG1	34186823	34186955	+	Dst
	LG1	34187976	34193267	+	Dst
	LG1	34193396	34193545	+	Dst
	LG1	34194009	34194224	+	Dst
	LG1	34194519	34194668	+	Dst
	LG1	34195832	34196065	+	Dst
	LG1	34197205	34197357	+	Dst
	LG1	34198522	34198755	+	Dst
	LG1	34199296	34199562	+	Dst
	LG1	34200874	34201419	+	Dst
	LG1	34202449	34202625	+	Dst
	LG1	34208558	34208681	+	Dst
	LG1	34211158	34211366	+	Dst
	LG1	34212226	34212543	+	Dst
	LG1	34212906	34213072	+	Dst
	LG1	34214538	34214694	+	Dst
	LG1	34215490	34215616	+	Dst
	LG1	34217814	34217876	+	Dst
	LG1	34218339	34218580	+	Dst
	LG1	34219400	34219529	+	Dst
	LG1	34223808	34224007	+	Dst
	LG1	34225513	34226008	+	Dst
	LG1	34227779	34229250	+	Dst
	LG1	34236600	34238824	+	RP24-422C24.2
	LG1	34242623	34242784	+	Dst
	LG1	34244348	34244518	+	Dst
	LG1	34247653	34247819	+	Dst
	LG1	34249483	34249642	+	Dst
	LG1	34249808	34250134	+	Dst
	LG1	34250614	34250698	+	Dst
	LG1	34251700	34251941	+	Dst
	LG1	34252815	34253021	+	Dst
	LG1	34256236	34256355	+	Dst
	LG1	34256546	34256653	+	Dst
	LG1	34257726	34257944	+	Dst
	LG1	34260168	34260371	+	Dst
	LG1	34262024	34262255	+	Dst
	LG1	34263268	34263494	+	Dst
	LG1	34264529	34264651	+	Dst
	LG1	34264754	34264855	+	Dst
	LG1	34266861	34266962	+	Dst
	LG1	34268233	34268406	+	Dst
	LG1	34268739	34268894	+	Dst
	LG1	34270832	34271029	+	Dst
	LG1	34271359	34271487	+	Dst
	LG1	34274172	34274342	+	Dst
	LG1	34275209	34275364	+	Dst
	LG1	34275683	34275889	+	Dst
	LG1	34278030	34278149	+	Dst
	LG1	34282433	34282602	+	Dst
	LG1	34284269	34284428	+	Dst
	LG1	34287193	34287387	+	Dst
	LG1	34287897	34288025	+	Dst
	LG1	34289530	34289673	+	Dst
	LG1	34290365	34290553	+	Dst
	LG1	34291793	34291922	+	Dst
	LG1	34293326	34293489	+	Dst
	LG1	34294390	34294552	+	Dst
	LG1	34295160	34295314	+	Dst
	LG1	34295468	34295542	+	Dst
	LG1	34295672	34295689	+	Dst
	LG1	34296748	34296765	+	Dst
	LG1	34299727	34299844	+	Dst
	LG1	34301867	34301938	+	Dst
	LG1	34302836	34303038	+	Dst
	LG1	34303427	34303537	+	Dst
	LG1	34306534	34306657	+	Dst
	LG1	34307336	34308658	+	Dst
	LG1	34433136	34433214	-	Mir5103
	LG1	34436686	34437625	-	Ccdc115
	LG1	34437742	34437873	-	Ccdc115
	LG1	34438865	34438947	-	Ccdc115
	LG1	34439058	34439161	-	Ccdc115
	LG1	34439243	34439687	-	Ccdc115
	LG1	34439866	34439942	+	Imp4
	LG1	34439952	34440164	+	Imp4
	LG1	34442925	34443119	+	Imp4
	LG1	34443393	34443502	+	Imp4
	LG1	34443578	34443710	+	Imp4
	LG1	34443784	34444106	+	Imp4
	LG1	34444211	34444284	+	Imp4
	LG1	34444373	34445751	+	Imp4
	LG1	34459761	34459931	+	Ptpn18
	LG1	34462717	34462825	+	Ptpn18
	LG1	34463122	34463198	+	Ptpn18
	LG1	34463284	34463379	+	Ptpn18
	LG1	34463481	34463519	+	Ptpn18
	LG1	34468308	34468376	+	Ptpn18
	LG1	34469855	34469917	+	Ptpn18
	LG1	34470215	34470357	+	Ptpn18
	LG1	34471508	34471574	+	Ptpn18
	LG1	34471656	34471733	+	Ptpn18
	LG1	34471827	34471916	+	Ptpn18
	LG1	34472118	34472206	+	Ptpn18
	LG1	34472778	34472983	+	Ptpn18
	LG1	34473350	34473424	+	Ptpn18
	LG1	34473594	34473790	+	Ptpn18
	LG1	34498435	34498633	+	Prss39
	LG1	34499233	34499395	+	Prss39
	LG1	34500021	34500295	+	Prss39
	LG1	34502032	34502201	+	Prss39
	LG1	34502629	34503067	+	Prss39
	LG1	34535645	34535952	+	Cfc1
	LG1	34536195	34536244	+	Cfc1
	LG1	34536347	34536514	+	Cfc1
	LG1	34537129	34537243	+	Cfc1
	LG1	34537323	34537432	+	Cfc1
	LG1	34543972	34544742	-	Prss40
	LG1	34544022	34544308	+	Cfc1
	LG1	34552354	34552829	-	Prss40
	LG1	34555985	34556154	-	Prss40
	LG1	34557869	34558143	-	Prss40
	LG1	34559759	34559950	-	Prss40
	LG1	34560746	34560959	-	Prss40
	LG1	34579267	34579655	-	1700101I19Rik
	LG1	34579735	34579808	+	Amer3
	LG1	34586726	34591001	+	Amer3
	LG1	34678294	34678368	+	Arhgef4
	LG1	34721784	34725239	+	Arhgef4
	LG1	34721784	34725239	+	C230030N03Rik
	LG1	34732203	34732502	+	Arhgef4
	LG1	34745418	34745544	+	Arhgef4
	LG1	34750969	34751111	+	Arhgef4
	LG1	34793307	34793443	+	Arhgef4
	LG1	34801787	34802084	+	Arhgef4
	LG1	34804994	34805173	+	Arhgef4
	LG1	34806030	34806209	+	Arhgef4
	LG1	34806389	34806772	+	Arhgef4
	LG1	34807098	34809292	+	Arhgef4
	LG1	34809771	34809902	+	Arhgef4
	LG1	34810385	34810628	+	Arhgef4
	LG1	34811160	34811237	+	Arhgef4
	LG1	34811752	34813389	+	Arhgef4
	LG1	34813299	34817484	-	Fam168b
	LG1	34818077	34818206	-	Fam168b
	LG1	34819672	34819870	-	Fam168b
	LG1	34819947	34820089	-	Fam168b
	LG1	34824100	34824135	-	Fam168b
	LG1	34828722	34828927	-	Fam168b
	LG1	34836814	34836894	-	Fam168b
	LG1	34842910	34843147	-	Fam168b
	LG1	34850067	34850154	+	Plekhb2
	LG1	34851928	34852068	+	Plekhb2
	LG1	34861969	34862013	+	Plekhb2
	LG1	34863102	34863254	+	Plekhb2
	LG1	34863567	34863669	+	Plekhb2
	LG1	34864569	34864608	+	Plekhb2
	LG1	34866238	34866327	+	Plekhb2
	LG1	34869403	34874058	+	Plekhb2
	LG1	34877012	34879682	+	Plekhb2
	LG1	35178946	35179074	-	Gm25096
	LG1	35761747	35761851	+	Gm25634
	LG1	36068754	36069538	+	Hs6st1
	LG1	36103865	36106798	+	Hs6st1
	LG1	36141847	36144568	-	Uggt1
	LG1	36146349	36146502	-	Uggt1
	LG1	36146942	36147058	-	Uggt1
	LG1	36150359	36150838	-	Uggt1
	LG1	36151947	36152107	-	Uggt1
	LG1	36155387	36155569	-	Uggt1
	LG1	36156541	36156625	-	Uggt1
	LG1	36157714	36157815	-	Uggt1
	LG1	36158422	36158510	-	Uggt1
	LG1	36160255	36160339	-	Uggt1
	LG1	36161985	36162070	-	Uggt1
	LG1	36162514	36163712	-	Uggt1
	LG1	36164754	36165269	-	Uggt1
	LG1	36165837	36166139	-	Uggt1
	LG1	36170528	36170623	-	Uggt1
	LG1	36173774	36173904	-	Uggt1
	LG1	36174418	36174549	-	Uggt1
	LG1	36175235	36175441	-	Uggt1
	LG1	36176573	36176667	-	Uggt1
	LG1	36177116	36177139	-	Uggt1
	LG1	36177858	36177956	-	Uggt1
	LG1	36179590	36180015	-	Uggt1
	LG1	36182800	36182964	-	Uggt1
	LG1	36184687	36184818	-	Uggt1
	LG1	36186164	36186299	-	Uggt1
	LG1	36191865	36191950	-	Uggt1
	LG1	36192722	36192841	-	Uggt1
	LG1	36196187	36196337	-	Uggt1
	LG1	36197881	36197972	-	Uggt1
	LG1	36202045	36202105	-	Uggt1
	LG1	36203119	36203218	-	Uggt1
	LG1	36208281	36208543	-	Uggt1
	LG1	36210326	36210404	-	Uggt1
	LG1	36211730	36211826	-	Uggt1
	LG1	36216468	36216642	-	Uggt1
	LG1	36221546	36221658	-	Uggt1
	LG1	36227828	36227958	-	Uggt1
	LG1	36230981	36231063	-	Uggt1
	LG1	36235133	36235268	-	Uggt1
	LG1	36244386	36244621	-	Uggt1
	LG1	36264931	36266862	-	Neurl3
	LG1	36268957	36269010	-	Neurl3
	LG1	36269520	36270008	-	Neurl3
	LG1	36273640	36273727	-	Neurl3
	LG1	36308047	36308150	+	Arid5a
	LG1	36312188	36312282	+	Arid5a
	LG1	36316308	36318591	+	Arid5a
	LG1	36318791	36318956	+	Arid5a
	LG1	36319295	36324332	+	Arid5a
	LG1	36336045	36337966	-	Kansl3
	LG1	36343557	36343690	-	Kansl3
	LG1	36343979	36344201	-	Kansl3
	LG1	36344376	36344485	-	Kansl3
	LG1	36345222	36345352	-	Kansl3
	LG1	36345691	36345772	-	Kansl3
	LG1	36346144	36346335	-	Kansl3
	LG1	36348831	36348987	-	Kansl3
	LG1	36349124	36349324	-	Kansl3
	LG1	36349711	36349774	-	Kansl3
	LG1	36351942	36352099	-	Kansl3
	LG1	36352235	36352309	-	Kansl3
	LG1	36353899	36353970	-	Kansl3
	LG1	36354077	36354178	-	Kansl3
	LG1	36354403	36354519	-	Kansl3
	LG1	36354954	36355085	-	Kansl3
	LG1	36358345	36358530	-	Kansl3
	LG1	36358675	36358765	-	Kansl3
	LG1	36365793	36365963	-	Kansl3
	LG1	36368082	36368347	-	Kansl3
	LG1	36369417	36369493	-	Kansl3
	LG1	36372628	36372712	+	Fer1l5
	LG1	36374023	36374075	+	Fer1l5
	LG1	36374853	36374944	+	Fer1l5
	LG1	36375509	36375617	+	Fer1l5
	LG1	36377046	36377100	+	Fer1l5
	LG1	36378172	36378281	+	Fer1l5
	LG1	36378705	36378833	+	Fer1l5
	LG1	36379795	36379857	+	Fer1l5
	LG1	36383134	36383164	+	Fer1l5
	LG1	36385431	36385546	+	Fer1l5
	LG1	36385784	36385904	+	Fer1l5
	LG1	36386436	36386488	+	Fer1l5
	LG1	36387522	36387590	+	Fer1l5
	LG1	36388927	36388970	+	Fer1l5
	LG1	36389058	36389140	+	Fer1l5
	LG1	36389232	36389321	+	Fer1l5
	LG1	36390836	36390964	+	Fer1l5
	LG1	36392613	36392790	+	Fer1l5
	LG1	36401697	36401821	+	Fer1l5
	LG1	36402844	36402944	+	Fer1l5
	LG1	36403553	36403730	+	Fer1l5
	LG1	36403808	36403963	+	Fer1l5
	LG1	36405092	36405224	+	Fer1l5
	LG1	36406835	36406998	+	Fer1l5
	LG1	36407255	36407369	+	Fer1l5
	LG1	36408213	36408315	+	Fer1l5
	LG1	36408825	36409000	+	Fer1l5
	LG1	36409104	36409270	+	Fer1l5
	LG1	36409470	36409602	+	Fer1l5
	LG1	36409708	36409785	+	Fer1l5
	LG1	36411189	36411370	+	Fer1l5
	LG1	36411555	36411716	+	Fer1l5
	LG1	36411888	36411992	+	Fer1l5
	LG1	36412883	36413029	+	Fer1l5
	LG1	36413107	36413269	+	Fer1l5
	LG1	36415080	36415130	+	Fer1l5
	LG1	36415237	36415341	+	Fer1l5
	LG1	36415895	36416014	+	Fer1l5
	LG1	36416765	36416926	+	Fer1l5
	LG1	36417172	36417263	+	Fer1l5
	LG1	36417664	36417834	+	Fer1l5
	LG1	36418023	36418171	+	Fer1l5
	LG1	36418401	36418540	+	Fer1l5
	LG1	36419979	36420067	+	Fer1l5
	LG1	36420256	36420373	+	Fer1l5
	LG1	36420541	36420682	+	Fer1l5
	LG1	36420896	36420995	+	Fer1l5
	LG1	36421072	36421262	+	Fer1l5
	LG1	36421426	36421535	+	Fer1l5
	LG1	36421780	36421927	+	Fer1l5
	LG1	36422038	36422409	+	Fer1l5
	LG1	36422364	36424836	-	Lman2l
	LG1	36424839	36425290	-	Lman2l
	LG1	36428435	36428549	-	Lman2l
	LG1	36428633	36428794	-	Lman2l
	LG1	36429756	36429788	-	Lman2l
	LG1	36439046	36439128	-	Lman2l
	LG1	36439905	36442168	-	Lman2l
	LG1	36443791	36443909	-	Lman2l
	LG1	36444337	36444442	-	Lman2l
	LG1	36445350	36445571	-	Lman2l
	LG1	36471908	36473373	+	Cnnm4
	LG1	36498300	36498443	+	Cnnm4
	LG1	36498705	36498839	+	Cnnm4
	LG1	36499721	36499890	+	Cnnm4
	LG1	36500195	36500291	+	Cnnm4
	LG1	36505912	36506090	+	Cnnm4
	LG1	36506720	36509075	+	Cnnm4
	LG1	36512178	36513464	+	Cnnm3
	LG1	36519262	36519405	+	Cnnm3
	LG1	36520388	36520745	+	Cnnm3
	LG1	36520829	36520998	+	Cnnm3
	LG1	36521071	36521225	+	Cnnm3
	LG1	36521515	36521648	+	Cnnm3
	LG1	36522011	36522149	+	Cnnm3
	LG1	36524345	36524443	+	Cnnm3
	LG1	36525477	36528548	+	Cnnm3
	LG1	36530845	36531952	-	Ankrd23
	LG1	36532034	36532132	-	Ankrd23
	LG1	36532220	36532318	-	Ankrd23
	LG1	36532423	36532521	-	Ankrd23
	LG1	36532613	36532711	-	Ankrd23
	LG1	36532892	36533017	-	Ankrd23
	LG1	36534298	36534426	-	Ankrd23
	LG1	36534602	36534748	-	Ankrd23
	LG1	36535993	36536040	-	Ankrd23
	LG1	36538484	36539845	-	Ankrd39
	LG1	36542170	36542373	-	Ankrd39
	LG1	36543073	36543176	-	Ankrd39
	LG1	36547397	36547512	-	Ankrd39
	LG1	36548953	36550678	-	Sema4c
	LG1	36550816	36550886	-	Sema4c
	LG1	36550978	36551138	-	Sema4c
	LG1	36552036	36552459	-	Sema4c
	LG1	36552562	36552706	-	Sema4c
	LG1	36553029	36553204	-	Sema4c
	LG1	36553289	36553440	-	Sema4c
	LG1	36553534	36553650	-	Sema4c
	LG1	36553777	36553873	-	Sema4c
	LG1	36554022	36554120	-	Sema4c
	LG1	36554232	36554536	-	Sema4c
	LG1	36554558	36554709	-	Sema4c
	LG1	36556238	36556386	-	Sema4c
	LG1	36557109	36557391	-	Sema4c
	LG1	36557666	36557863	-	Sema4c
	LG1	36558322	36558655	-	Sema4c
	LG1	36558665	36558711	+	D430040D24Rik
	LG1	36563005	36563331	-	Fam178b
	LG1	36564617	36564679	+	D430040D24Rik
	LG1	36564641	36564793	-	Fam178b
	LG1	36565122	36565901	+	D430040D24Rik
	LG1	36565139	36565216	-	Fam178b
	LG1	36578782	36578907	-	Fam178b
	LG1	36586167	36586254	-	Fam178b
	LG1	36587756	36587938	-	Fam178b
	LG1	36589480	36589560	-	Fam178b
	LG1	36593446	36593580	-	Fam178b
	LG1	36600213	36600472	-	Fam178b
	LG1	36600658	36600834	-	Fam178b
	LG1	36601117	36601201	-	Fam178b
	LG1	36602052	36602396	+	Gm6428
	LG1	36608682	36608796	-	Fam178b
	LG1	36632681	36632765	-	Fam178b
	LG1	36635427	36635532	-	Fam178b
	LG1	36644461	36644613	-	Fam178b
	LG1	36659615	36659676	-	Fam178b
	LG1	36660987	36661301	-	Fam178b
	LG1	36664221	36664295	+	Gm24133
	LG1	36683124	36683439	-	Fam178b
	LG1	36691759	36691961	+	Cox5b
	LG1	36692483	36692556	+	Cox5b
	LG1	36692723	36692822	+	Cox5b
	LG1	36693469	36693657	+	Cox5b
	LG1	36699474	36700450	-	Actr1b
	LG1	36700609	36700649	-	Actr1b
	LG1	36700808	36700869	-	Actr1b
	LG1	36701406	36701580	-	Actr1b
	LG1	36701693	36701923	-	Actr1b
	LG1	36701944	36702455	-	Actr1b
	LG1	36702747	36702872	-	Actr1b
	LG1	36706817	36706917	-	Actr1b
	LG1	36707139	36707436	-	Actr1b
	LG1	36708456	36708520	-	Actr1b
	LG1	36709832	36709943	-	Actr1b
	LG1	36710071	36710273	-	Actr1b
	LG1	36714020	36714093	-	Actr1b
	LG1	36714487	36714705	-	Actr1b
	LG1	36762215	36762296	+	Zap70
	LG1	36765216	36766227	-	RP23-247A1.2
	LG1	36771155	36771565	+	Zap70
	LG1	36772142	36772302	+	Zap70
	LG1	36778506	36778644	+	Zap70
	LG1	36778733	36778817	+	Zap70
	LG1	36778900	36778943	+	Zap70
	LG1	36779104	36779155	+	Zap70
	LG1	36779470	36779665	+	Zap70
	LG1	36780038	36780244	+	Zap70
	LG1	36781190	36781382	+	Zap70
	LG1	36781472	36781612	+	Zap70
	LG1	36781699	36781811	+	Zap70
	LG1	36782814	36783169	+	Zap70
	LG1	36792578	36793592	-	Tmem131
	LG1	36794431	36794585	-	Tmem131
	LG1	36795191	36795288	-	Tmem131
	LG1	36795488	36795584	-	Tmem131
	LG1	36795682	36795803	-	Tmem131
	LG1	36796549	36796711	-	Tmem131
	LG1	36799320	36799469	-	Tmem131
	LG1	36799657	36799781	-	Tmem131
	LG1	36802203	36802330	-	Tmem131
	LG1	36804846	36805024	-	Tmem131
	LG1	36808264	36808856	-	Tmem131
	LG1	36809209	36809367	-	Tmem131
	LG1	36810661	36810846	-	Tmem131
	LG1	36811794	36811980	-	Tmem131
	LG1	36812546	36812688	-	Tmem131
	LG1	36812942	36813093	-	Tmem131
	LG1	36815831	36815897	-	Tmem131
	LG1	36816263	36816372	-	Tmem131
	LG1	36816485	36816623	-	Tmem131
	LG1	36819035	36819152	-	Tmem131
	LG1	36819270	36819345	-	Tmem131
	LG1	36819440	36819592	-	Tmem131
	LG1	36823449	36823535	-	Tmem131
	LG1	36825117	36825221	-	Tmem131
	LG1	36825613	36825747	-	Tmem131
	LG1	36825830	36825940	-	Tmem131
	LG1	36827411	36827581	-	Tmem131
	LG1	36827663	36827816	-	Tmem131
	LG1	36828474	36828582	-	Tmem131
	LG1	36829975	36830083	-	Tmem131
	LG1	36833908	36833969	-	Tmem131
	LG1	36835028	36835084	-	Tmem131
	LG1	36835174	36835324	-	Tmem131
	LG1	36838379	36838459	-	Tmem131
	LG1	36840809	36840931	-	Tmem131
	LG1	36842006	36842122	-	Tmem131
	LG1	36855248	36855371	-	Tmem131
	LG1	36872926	36872994	-	Tmem131
	LG1	36881757	36881797	-	Tmem131
	LG1	36889687	36889748	-	Tmem131
	LG1	36939601	36939972	-	Tmem131
	LG1	36958357	36958854	-	Rpl12-ps1
	LG1	37005848	37005966	+	n-R5s210
	LG1	37026992	37027041	+	Vwa3b
	LG1	37029711	37029835	+	Vwa3b
	LG1	37036038	37036269	+	Vwa3b
	LG1	37042717	37042811	+	Vwa3b
	LG1	37045356	37045606	+	Vwa3b
	LG1	37052124	37052286	+	Vwa3b
	LG1	37060737	37060906	+	Vwa3b
	LG1	37063843	37064058	+	Vwa3b
	LG1	37076777	37077406	+	Vwa3b
	LG1	37154279	37154478	+	Vwa3b
	LG1	37157770	37157888	+	Vwa3b
	LG1	37164937	37164987	+	Vwa3b
	LG1	37166083	37166284	+	Vwa3b
	LG1	37174283	37174394	+	Vwa3b
	LG1	37175948	37176072	+	Vwa3b
	LG1	37177781	37177918	+	Vwa3b
	LG1	37179569	37179669	+	Vwa3b
	LG1	37187004	37187180	+	Vwa3b
	LG1	37187372	37187599	+	Vwa3b
	LG1	37188029	37188080	+	Vwa3b
	LG1	37218831	37218936	+	Cnga3
	LG1	37219757	37220033	+	Cnga3
	LG1	37232700	37232836	+	Cnga3
	LG1	37242291	37242404	+	Cnga3
	LG1	37245297	37245476	+	Cnga3
	LG1	37254414	37254521	+	Cnga3
	LG1	37258479	37258585	+	Cnga3
	LG1	37261176	37263862	+	Cnga3
	LG1	37300345	37300598	+	Inpp4a
	LG1	37300788	37300906	+	Inpp4a
	LG1	37330184	37330639	-	4930439A04Rik
	LG1	37334062	37334357	-	4930439A04Rik
	LG1	37334587	37334695	-	4930439A04Rik
	LG1	37348916	37349031	+	Inpp4a
	LG1	37357865	37357926	+	Inpp4a
	LG1	37358337	37358546	+	Inpp4a
	LG1	37359030	37359074	+	Inpp4a
	LG1	37364631	37364749	+	Inpp4a
	LG1	37366684	37366800	+	Inpp4a
	LG1	37367060	37367139	+	Inpp4a
	LG1	37367391	37367502	+	Inpp4a
	LG1	37368278	37368368	+	Inpp4a
	LG1	37368798	37368945	+	Inpp4a
	LG1	37369738	37370009	+	Inpp4a
	LG1	37372238	37372342	+	Inpp4a
	LG1	37372847	37372955	+	Inpp4a
	LG1	37373129	37373134	+	Inpp4a
	LG1	37374808	37374825	+	Inpp4a
	LG1	37378053	37378064	+	Inpp4a
	LG1	37378114	37378297	+	Inpp4a
	LG1	37379377	37379595	+	Inpp4a
	LG1	37380458	37380713	+	Inpp4a
	LG1	37383874	37383906	+	Inpp4a
	LG1	37388235	37388407	+	Inpp4a
	LG1	37389324	37389447	+	Inpp4a
	LG1	37390187	37390313	+	Inpp4a
	LG1	37390586	37390726	+	Inpp4a
	LG1	37393493	37393590	+	Inpp4a
	LG1	37396624	37396736	+	Inpp4a
	LG1	37399337	37400128	+	Inpp4a
	LG1	37404017	37405010	+	Inpp4a
	LG1	37408696	37411316	+	Inpp4a
	LG1	37417638	37421182	-	Coa5
	LG1	37428917	37429000	-	Coa5
	LG1	37430443	37430677	-	Coa5
	LG1	37430744	37431067	+	Unc50
	LG1	37431867	37432150	+	Unc50
	LG1	37433125	37433245	+	Unc50
	LG1	37437736	37437875	+	Unc50
	LG1	37437951	37438186	+	Unc50
	LG1	37439255	37439697	+	Unc50
	LG1	37439913	37445262	-	Mgat4a
	LG1	37445384	37445496	-	Mgat4a
	LG1	37449673	37449739	-	Mgat4a
	LG1	37450916	37450994	-	Mgat4a
	LG1	37452818	37453011	-	Mgat4a
	LG1	37453109	37453216	-	Mgat4a
	LG1	37455313	37455443	-	Mgat4a
	LG1	37457158	37457272	-	Mgat4a
	LG1	37463461	37463536	-	Mgat4a
	LG1	37464990	37465103	-	Mgat4a
	LG1	37467106	37467152	-	Mgat4a
	LG1	37487776	37489567	-	4930594C11Rik
	LG1	37490845	37490978	-	Mgat4a
	LG1	37496458	37496718	-	Mgat4a
	LG1	37499158	37499325	-	Mgat4a
	LG1	37536553	37536918	-	Mgat4a
	LG1	37541471	37541522	-	Mgat4a
	LG1	37612177	37612899	-	2010300C02Rik
	LG1	37613837	37613981	-	2010300C02Rik
	LG1	37614759	37614844	+	4930556I23Rik
	LG1	37614981	37615168	-	2010300C02Rik
	LG1	37615399	37615872	+	4930556I23Rik
	LG1	37624269	37626576	-	2010300C02Rik
	LG1	37628719	37628928	-	2010300C02Rik
	LG1	37631822	37631983	-	2010300C02Rik
	LG1	37632317	37632452	-	2010300C02Rik
	LG1	37638367	37638535	-	2010300C02Rik
	LG1	37645067	37645146	-	2010300C02Rik
	LG1	37676837	37677274	-	2010300C02Rik
	LG1	37720070	37720585	-	2010300C02Rik
	LG1	37755088	37756037	-	Tsga10
	LG1	37761339	37761611	-	Tsga10
	LG1	37761946	37762050	-	Tsga10
	LG1	37763823	37764025	-	Tsga10
	LG1	37784333	37784542	-	Tsga10
	LG1	37801983	37802425	-	Tsga10
	LG1	37805149	37805259	-	Tsga10
	LG1	37807457	37807625	-	Tsga10
	LG1	37811492	37811547	-	Tsga10
	LG1	37816052	37816206	-	Tsga10
	LG1	37820045	37820160	-	Tsga10
	LG1	37832926	37835855	-	Tsga10
	LG1	37835942	37836112	-	Tsga10
	LG1	37840581	37841176	-	Tsga10
	LG1	37841704	37844240	-	Tsga10
	LG1	37849750	37849965	-	Tsga10
	LG1	37855763	37855892	-	Tsga10
	LG1	37865244	37865354	-	Tsga10
	LG1	37865541	37865597	-	Tsga10
	LG1	37865624	37865816	-	Tsga10
	LG1	37865817	37866024	+	AC119189.1
	LG1	37869026	37871906	+	AC119189.1
	LG1	37872256	37872549	+	Lipt1
	LG1	37872724	37872843	+	Lipt1
	LG1	37872892	37873163	+	Lipt1
	LG1	37875319	37875643	-	Mitd1
	LG1	37875382	37877905	+	Lipt1
	LG1	37879246	37879880	-	Mitd1
	LG1	37880077	37880137	-	Mitd1
	LG1	37880138	37880635	-	Mitd1
	LG1	37881444	37881559	-	Mitd1
	LG1	37882210	37882379	-	Mitd1
	LG1	37882440	37883209	-	Mitd1
	LG1	37885726	37885827	-	Mitd1
	LG1	37890671	37890922	-	Mitd1
	LG1	37890988	37891095	+	Mrpl30
	LG1	37892340	37892684	+	Mrpl30
	LG1	37893455	37893758	+	Mrpl30
	LG1	37894451	37894527	+	Mrpl30
	LG1	37895842	37895922	+	Mrpl30
	LG1	37897768	37898346	+	Mrpl30
	LG1	37898573	37899047	+	Mrpl30
	LG1	37906425	37908179	-	Lyg2
	LG1	37909373	37909511	-	Lyg2
	LG1	37910400	37910596	-	Lyg2
	LG1	37911563	37911706	-	Lyg2
	LG1	37916224	37916296	-	Lyg2
	LG1	37916740	37916997	-	Lyg2
	LG1	37934101	37934275	+	Gm15457
	LG1	37936047	37936210	+	Gm15457
	LG1	37947251	37947518	-	Lyg1
	LG1	37947692	37947824	-	Lyg1
	LG1	37949179	37949356	+	Gm15457
	LG1	37949431	37949515	-	Lyg1
	LG1	37950235	37953365	+	Gm15457
	LG1	37950316	37950509	-	Lyg1
	LG1	37951174	37951281	-	Lyg1
	LG1	37953265	37953339	-	Lyg1
	LG1	37953949	37954031	+	Gm15457
	LG1	37954398	37954661	+	Gm15457
	LG1	37958260	37958284	-	Lyg1
	LG1	37974493	37974729	+	Gm23409
	LG1	37984411	37988323	-	Txndc9
	LG1	37990530	37991001	-	Txndc9
	LG1	37994536	37994654	-	Txndc9
	LG1	37995668	37996391	-	Txndc9
	LG1	37997039	37997208	-	Txndc9
	LG1	37997443	37997888	-	Txndc9
	LG1	37998552	37998866	+	Eif5b
	LG1	38018348	38018473	+	Eif5b
	LG1	38018567	38018651	+	Eif5b
	LG1	38019407	38020076	+	Eif5b
	LG1	38022136	38022353	+	Eif5b
	LG1	38022706	38022856	+	Eif5b
[truncated: 468,238+ more rows]
